# Supplementary material for: Association of Long Noncoding RNA Biomarkers With Clinical Immune Subtype and Prediction of Immunotherapy Response in Patients With Cancer
Source: PubMed Central journal article supplement (PMC7139278; doi:10.1001/jamanetworkopen.2020.2149), 2020-04-07
Supplement: jamanetwopen-3-e202149-s001.pdf [file jamanetwopen-3-e202149-s001.pdf]

## Supplementary Online Content

Yu Y, Zhang W, Li A, et al. Association of long noncoding RNA biomarkers with clinical immune subtype and prediction of immunotherapy response in patients with cancer. *JAMA Netw Open*. 2020;3(4):e202149. doi:10.1001/jamanetworkopen.2020.2149

**eAppendix 1.** Supplemental Results 1

**eAppendix 2.** Supplemental Results 2

**eAppendix 3.** Supplemental Results 3

**eAppendix 4.** Supplemental Results 4

**eFigure 1.** Landscape of lncRNA Interactions in the IMvig210 Trial

**eFigure 2.** Unsupervised Clustering of lncRNAs for 348 Patients in the IMvig210 Trial

**eFigure 3.** Immune Molecular Expression in Immune-Functional Class Versus Immune-Nonfunctional Class in the IMvig210 Trial

**eFigure 4.** Heatmap Representation of Immune Molecules in Immune-Functional and Immune-Nonfunctional Classes in the IMvig210 Trial

**eFigure 5.** Gene Set Variation Analysis of Immune-Functional and Immune-Nonfunctional Classes in the IMvig210 Trial

**eFigure 6.** Identification of Essential lncRNAs in the Clustering in the IMvig210 Trial

**eFigure 7.** Gene Expression Analysis Between Immune-Functional and Immune-Nonfunctional Classes in the IMvig210 Trial

**eFigure 8.** Gene Set Enrichment Analysis of NF- $\kappa$ B Pathway Between Immune-Functional and Immune-Nonfunctional Classes

**eFigure 9.** Matrix Plot Showing the Correlation of NKILA Expression With Signaling Pathways in the IMvig210 Trial

**eFigure 10.** KEGG Pathway Enrichment Analysis of NKILA in the IMvig210 Trial

**eFigure 11.** Gene Ontology Enrichment Analysis of NKILA in the IMvig210 Trial

**eFigure 12.** NKILA Expression in Immune-Functional Class Versus Immune-Nonfunctional Class in the IMvig210 Trial

**eFigure 13.** Association of lncRNA-Based Class With Overall Survival in Pancancer

**eFigure 14.** Association of NKILA Expression With Overall Survival in Pancancer

**eFigure 15.** Association of Cytotoxic T Lymphocytes With Overall Survival

**eFigure 16.** Correlations Between Cytotoxic T Lymphocytes and Various Immune Molecules in the IMvig210 Trial

**eFigure 17.** Objective Response Rate Stratified by lncRNAs and Infiltration of Cytotoxic T Lymphocytes

**eFigure 18.** Association of lncRNA-CTL-Based Class With Immune Molecular Expression in the IMvig210 Trial

**eFigure 19.** Immune Molecular Expression Pattern of lncRNA-CTL-Based Classes in TCGA Bladder Cancer Cohort

**eFigure 20.** Weighted Gene Co-Expression Network Analysis of Four lncRNA-CTL-Based Classes in

the IMvigor210 Trial

**eFigure 21.** KEGG Pathway Enrichment Analysis of Four lncRNA-CTL-Based Classes in the IMvigor210 Trial

**eFigure 22.** Gene Ontology Pathway Enrichment Analysis of Four lncRNA-CTL-Based Classes in the IMvigor210 Trial

**eFigure 23.** Identification of the Optimal Cutoff for lncRNA Score

**eFigure 24.** Overall Survival Stratified by lncRNA Score in the IMvigor210 Trial

**eFigure 25.** Objective Response Rate Stratified by lncRNA Score in the IMvigor210 Trial

**eFigure 26.** Disease Control Rate Stratified by lncRNA Score in the IMvigor210 Trial

**eFigure 27.** Objective Response Rate Stratified by lncRNA Score in the Melanoma Immunotherapy Cohort

**eFigure 28.** Association of lncRNA Score With Overall Survival in TCGA Cohorts

**eFigure 29.** Association of lncRNA Score and Multiomics Biomarker With Overall Survival in the IMvigor210 Trial

**eFigure 30.** Association of lncRNA Score With Response in the IMvigor210 Trial

**eTable 1.** Characteristics and Clinical Outcomes of the Patients in IMvigor210 Trial

**eTable 2.** Baseline Characteristics of the Patients in TCGA Bladder Cancer Cohort

**eTable 3.** Kyoto Encyclopedia of Genes and Genomes Pathway Enrichment Analysis of NKILA in IMvigor210 Trial

**eTable 4.** Gene Ontology Pathway Enrichment Analysis of NKILA in IMvigor210 Trial

**eTable 5.** Kyoto Encyclopedia of Genes and Genomes Pathway Enrichment Analysis of Immune-Active Class in IMvigor210 Trial

**eTable 6.** Kyoto Encyclopedia of Genes and Genomes Pathway Enrichment Analysis of Immune-Exclusion Class in IMvigor210 Trial

**eTable 7.** Kyoto Encyclopedia of Genes and Genomes Pathway Enrichment Analysis of Immune-Dysfunctional Class in IMvigor210 Trial

**eTable 8.** Kyoto Encyclopedia of Genes and Genomes Pathway Enrichment Analysis of Immune-Desert Class in IMvigor210 Trial

**eTable 9.** Gene Ontology Pathway Enrichment Analysis of Immune-Active Class in IMvigor210 Trial

**eTable 10.** Gene Ontology Pathway Enrichment Analysis of Immune-Exclusion Class in IMvigor210 Trial

**eTable 11.** Gene Ontology Pathway Enrichment Analysis of Immune-Dysfunctional Class in IMvigor210 Trial

**eTable 12.** Gene Ontology Pathway Enrichment Analysis of Immune-Desert Class in IMvigor210 Trial

This supplementary material has been provided by the authors to give readers additional information about their work.

## eAppendix 1.

The prognostic implications of two distinct long non-coding RNA (lncRNA)-based classes for overall survival (OS) were identified in lung squamous cell carcinoma (LUSC) (HR 0.75, 95% CI 0.57–0.99;  $P=.038$ ), bladder cancer (HR 0.68, 95% CI, 0.51–0.92;  $P=.011$ ), and melanoma (HR 0.62, 95% CI 0.47–0.81;  $P<.001$ ) (eFigure 13 in the Supplement). High NF- $\kappa$ B-interacting lncRNA (NKILA) versus low NKILA was found to be prognostic of OS in lung adenocarcinoma (LUAD) (HR 0.63, 95% CI 0.45–0.88;  $P=.007$ ) and LUSC (HR 0.66, 95% CI 0.50–0.88;  $P=.004$ ) (eFigure 14 in the Supplement).

## eAppendix 2.

High tumor specific cytotoxic T lymphocyte (CTL) versus low CTL was associated with better OS from immunotherapy in bladder cancer (HR 0.57, 95% CI 0.39–0.84;  $P=.004$ ), better prognosis in LUAD (HR 0.74, 95% CI 0.55–0.98;  $P=.037$ ), breast cancer (HR 0.63, 95% CI 0.46–0.86;  $P=.004$ ), HER-2 positive breast cancer (HR 0.32, 95% CI 0.12–0.82;  $P=.013$ ), bladder cancer (HR 0.62, 95% CI 0.45–0.86;  $P=.004$ ), and melanoma (HR 0.52, 95% CI 0.39–0.69;  $P<.001$ ) (eFigure 15 in the Supplement).

The CTL was closely correlated with multiple immune molecules including immune cells such as B cells, CD8 T cells, cytotoxic cells, dendritic cells, macrophages, neutrophils, T cells, natural killer cells, and type 1 T helper cells, central memory T cells, effector memory T cells, plasmacytoid dendritic cell, T follicular helper cells, and regulatory cells; immune checkpoints such as BTLA, CD160, CD226, CD274, CD28, CD70, CD80, CD86, HAVCR2, ICOS, IDO1, CTLA4, LAG3, PDCD1LG2, PVRIG, SIRPA, and TIGIT; and human leukocyte antigens such as HLA-A, HLA-B, HLA-DMA, HLA-DMB, HLA-DOA, HLA-DOB, HLA-DPA1, HLA-DPB1, HLA-DQA2, DLA-DRA, HLA-DRB1, HLA-DRB3, HLA-DRB4, HLA-DRB6, HLA-E, and HLA-F (eFigure 16 in the Supplement).

## eAppendix 3.

The lncRNA score was calculated according to the following:  $\text{LncRNA score} = - (\text{DLGAP1-AS1} \times 0.0388404669) - (\text{RAMP2-AS1} \times 0.1155662963) - (\text{BVES-AS1} \times 0.0553720312) - (\text{LIPE-AS1} \times 0.1033882346) + (\text{LINC01118} \times 0.0796557151) - (\text{FGD5-AS1} \times 0.0289597115) - (\text{AL513365.2} \times 0.20586808) - (\text{EMC1-AS1} \times 0.0694844742) + (\text{FTX} \times 0.0852566063) + (\text{SNHG15} \times 0.1004314629) - (\text{TMEM147-AS1} \times 0.0720185014) + (\text{TTN-AS1} \times 0.0540188921) + (\text{FLG-AS1} \times 0.0526396975) - (\text{CDKN2B-AS1} \times 0.0064524961) + (\text{USP2-AS1} \times 0.0747066713) - (\text{SBF2-AS1} \times 0.1293691962) - (\text{AC113382.1} \times 0.2179618875) + (\text{NOP14-AS1} \times 0.0644565543) + (\text{AC012636.1} \times 0.1939511817) - (\text{LINC01605} \times 0.0168478032) + (\text{PCAT1} \times 0.1453946597) + (\text{BRWD1-AS2} \times 0.0298250867) - (\text{USP3-AS1} \times 0.0691270103) + (\text{VPS9D1-AS1} \times 0.0003103997) - (\text{AC093249.6} \times 0.0139283015) - (\text{SNHG8} \times 0.0014401603) - (\text{FUT8-AS1} \times 0.0852427371) + (\text{NKILA} \times 0.1318600645) - (\text{SLFN1-AS1} \times 0.0472823654).$

## eAppendix 4.

Based on the optimal threshold (-1.41), difference in objective response rate between high lncRNA score and low lncRNA score was confirmed in melanoma immunotherapy cohort (47.8% vs 39.1%) (eFigure 27 in the Supplement). Additionally, the prognostic value of a low versus high lncRNA score was shown for LUAD (HR 0.66, 95% CI 0.49–0.90;  $P=.008$ ), LUSC (HR 0.75, 95% CI 0.57–0.98,  $P=.036$ ), breast cancer (HR 0.61, 95% CI 0.44–0.84;  $P=.002$ ), HER-2 positive breast cancer (HR 0.38, 95% CI 0.15–0.97;  $P=.035$ ), bladder cancer (HR 0.60, 95% CI 0.44–0.83;  $P=.002$ ), and melanoma (HR 0.70, 95% CI 0.53–0.91;  $P=.007$ ) (eFigure 28 in the Supplement).

**eFigure 1.** Landscape of lncRNA interactions in IMvigor210 Trial.

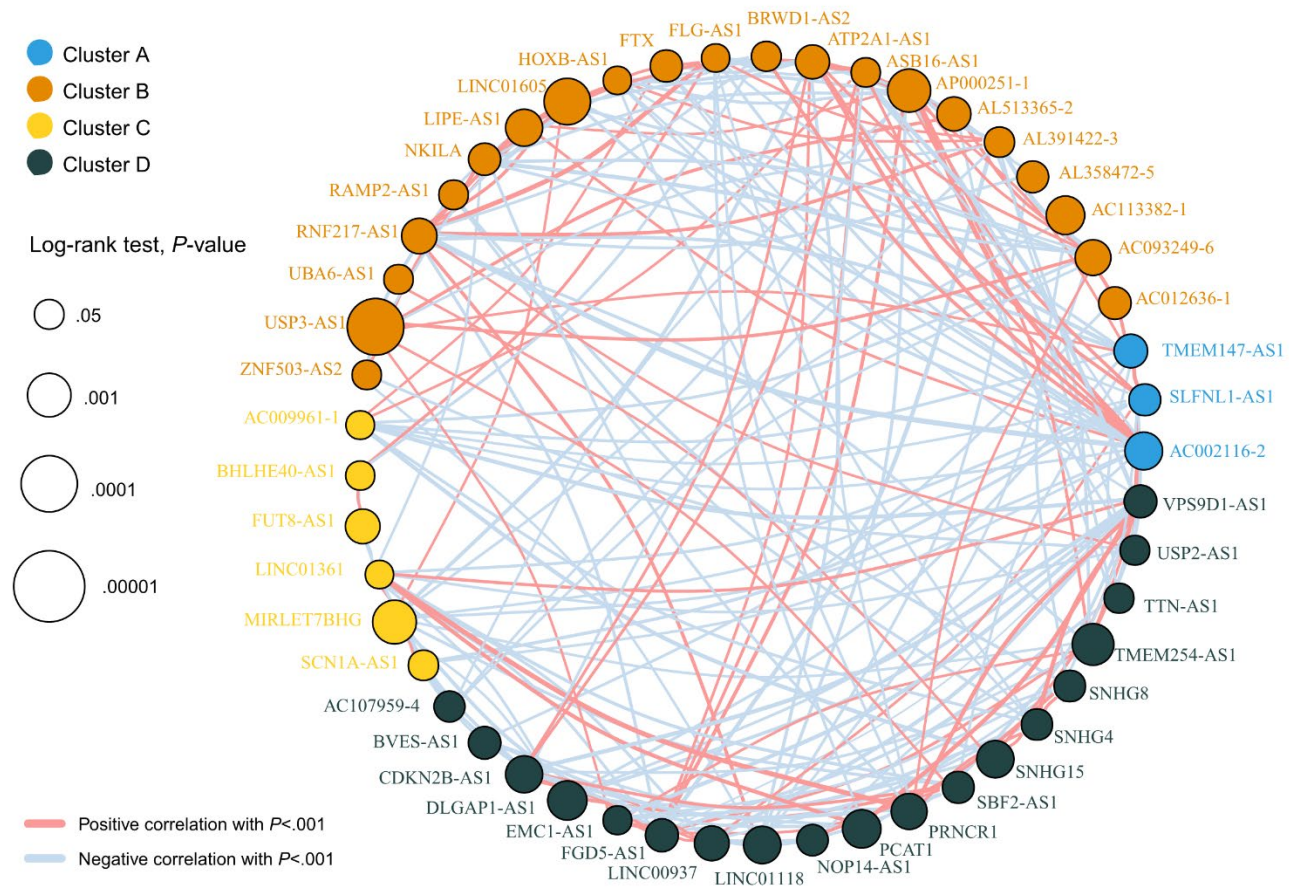



**eFigure 2. Unsupervised Clustering of lncRNAs for 348 Patients in IMvigor210 Trial.**

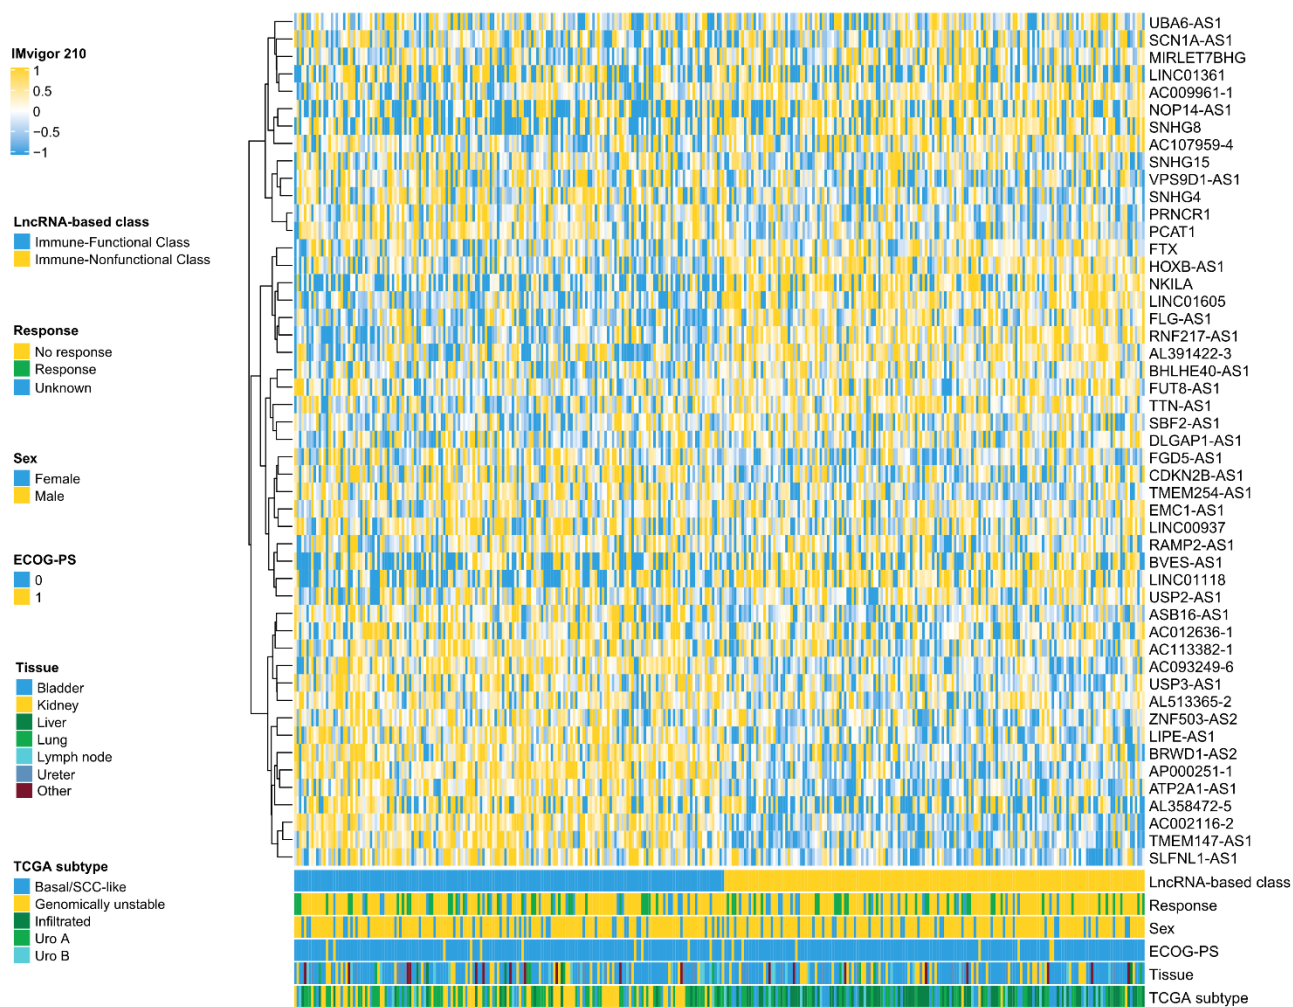

Each row of the heatmap represented a lncRNA. Each column represented a patient. The color indicates the level of expression; the color near to yellow indicates high expression, whereas the color near blue indicates low expression. lncRNA, long non-coding RNA; ECOG-PS, Eastern Cooperative Oncology Group Performance Status; TCGA, The Cancer Genome Atlas; SCC, squamous cell carcinoma.

**eFigure 3. Immune Molecular Expression in Immune-Functional Class Versus Immune-Nonfunctional Class in IMvigor210 Trial.**

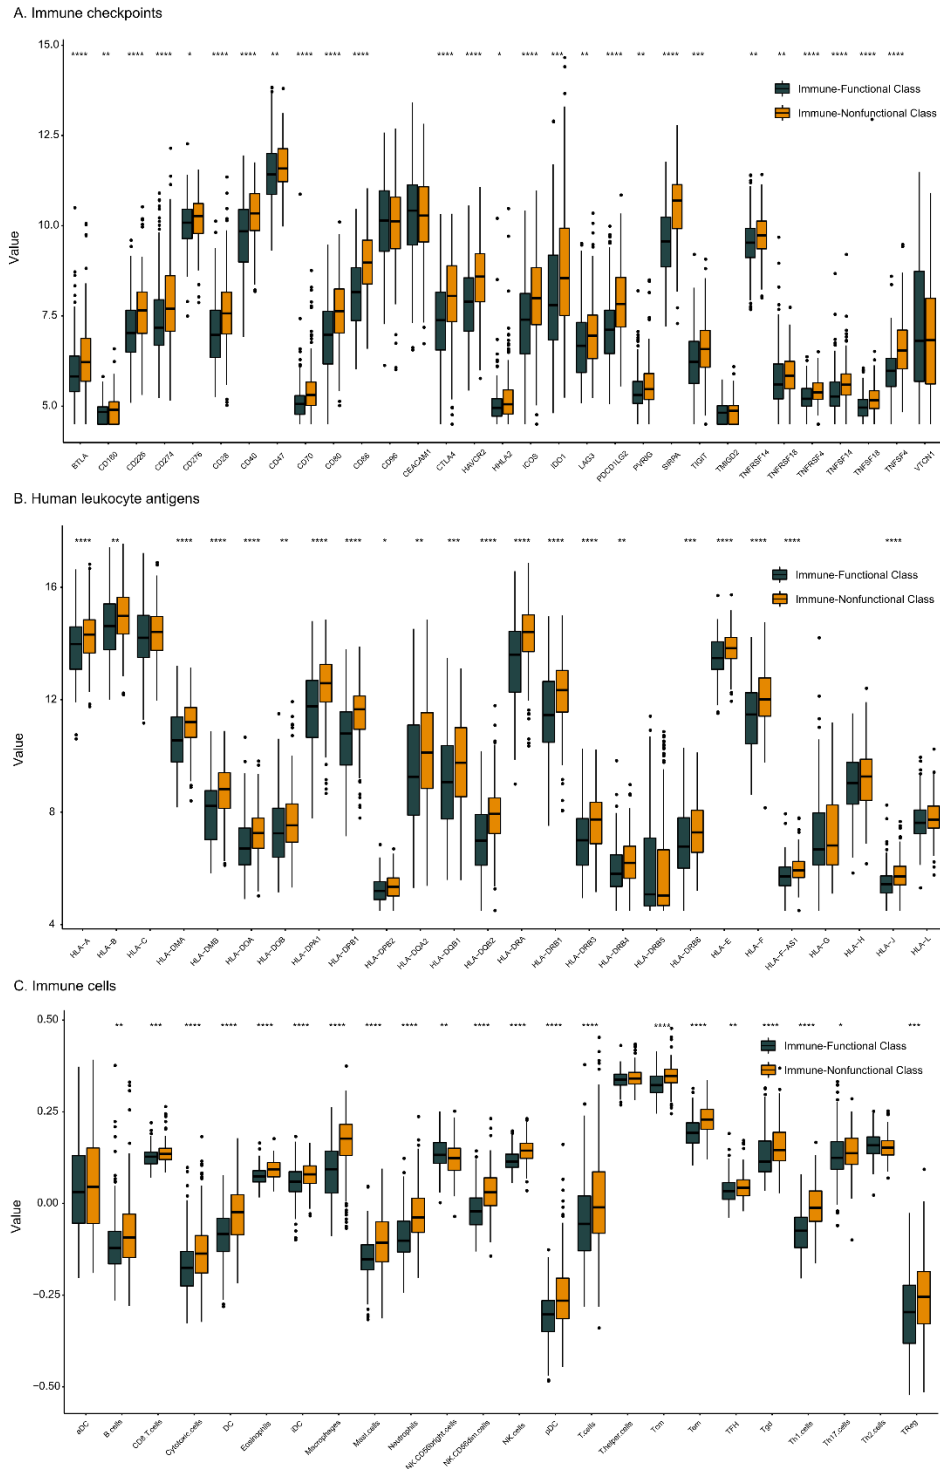

A, Immune checkpoints. B, Human leukocyte antigens. C, Immune cells. HLA, human leukocyte antigen; DC, dendritic cell; NK, natural killer; Th, helper T; Tcm, central memory T cells; Tem, effector memory T cells, pDC, plasmacytoid dendritic cell, TFH, T follicular helper cells; TReg,

---

regulatory cells.

**eFigure 4.** Heatmap representation of Immune Molecules in Immune-Functional and Immune-Nonfunctional Classes in IMvigor210 Trial.

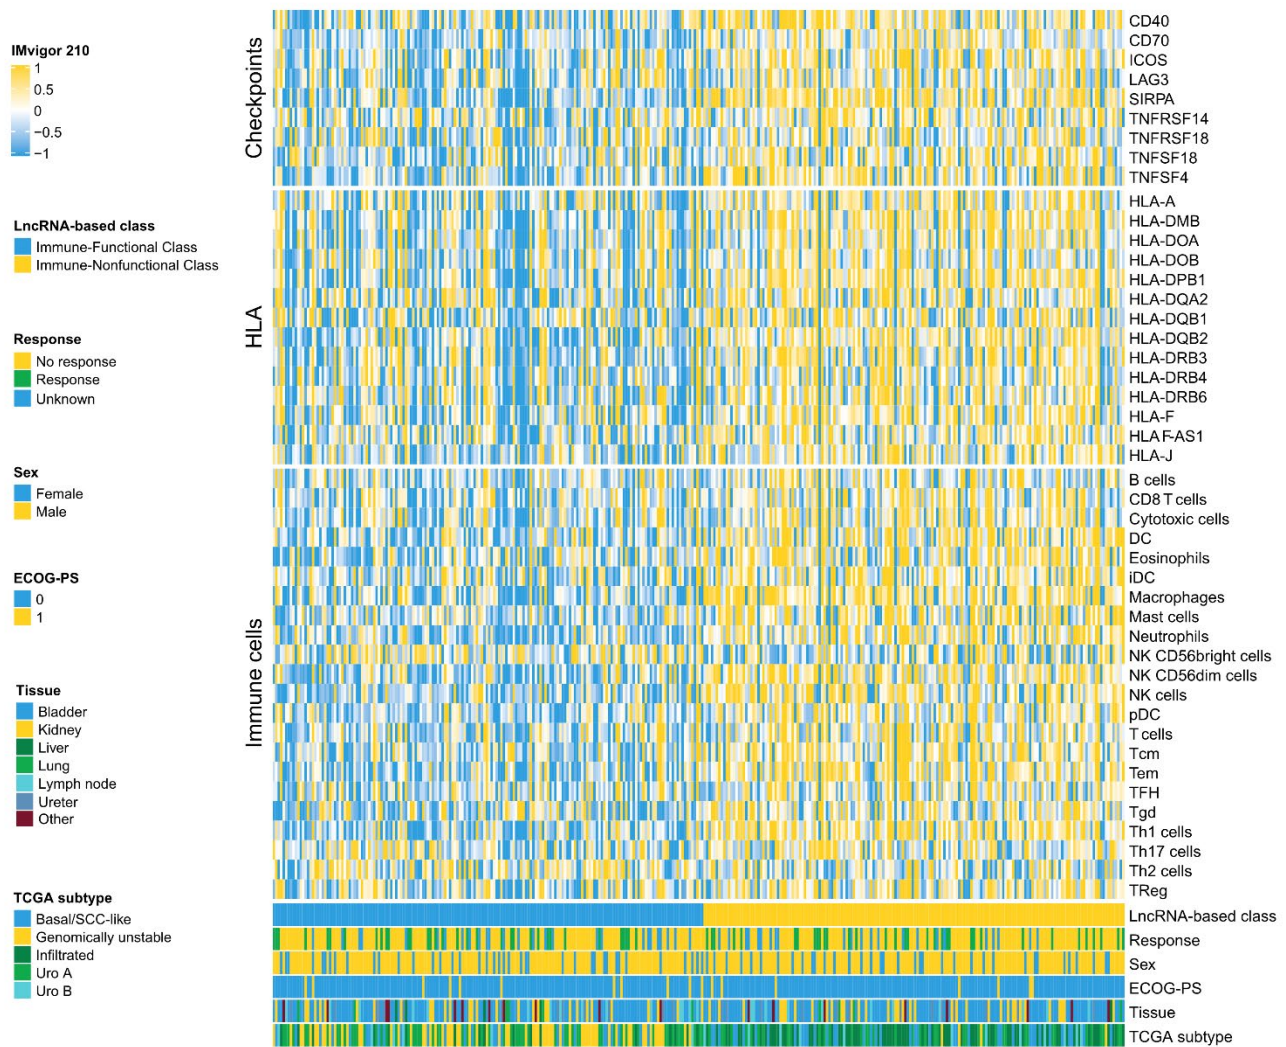

Each row of the heatmap represented an immune molecule or an immune cell. Each column represented a patient. The color indicates the level of expression; the color near to yellow indicates high expression, whereas the color near blue indicates low expression. Immune-Functional Class generally characterized by higher expressions of immune cells, immune checkpoints and human leukocyte antigens, compared to Immune-Nonfunctional Class. LncRNA, long non-coding RNA; ECOG-PS, Eastern Cooperative Oncology Group Performance Status; TCGA, The Cancer Genome Atlas; SCC, squamous cell carcinoma; HLA, human leukocyte antigen; DC, dendritic cell; NK, natural killer; Th, helper T; Tcm, central memory T cells; Tem, effector memory T cells, pDC, plasmacytoid dendritic cell, TFH, T follicular helper cells; TReg, regulatory cells.

**eFigure 5.** Gene set variation analysis of Immune-Functional and Immune-Nonfunctional Classes in IMvigor210 Trial.

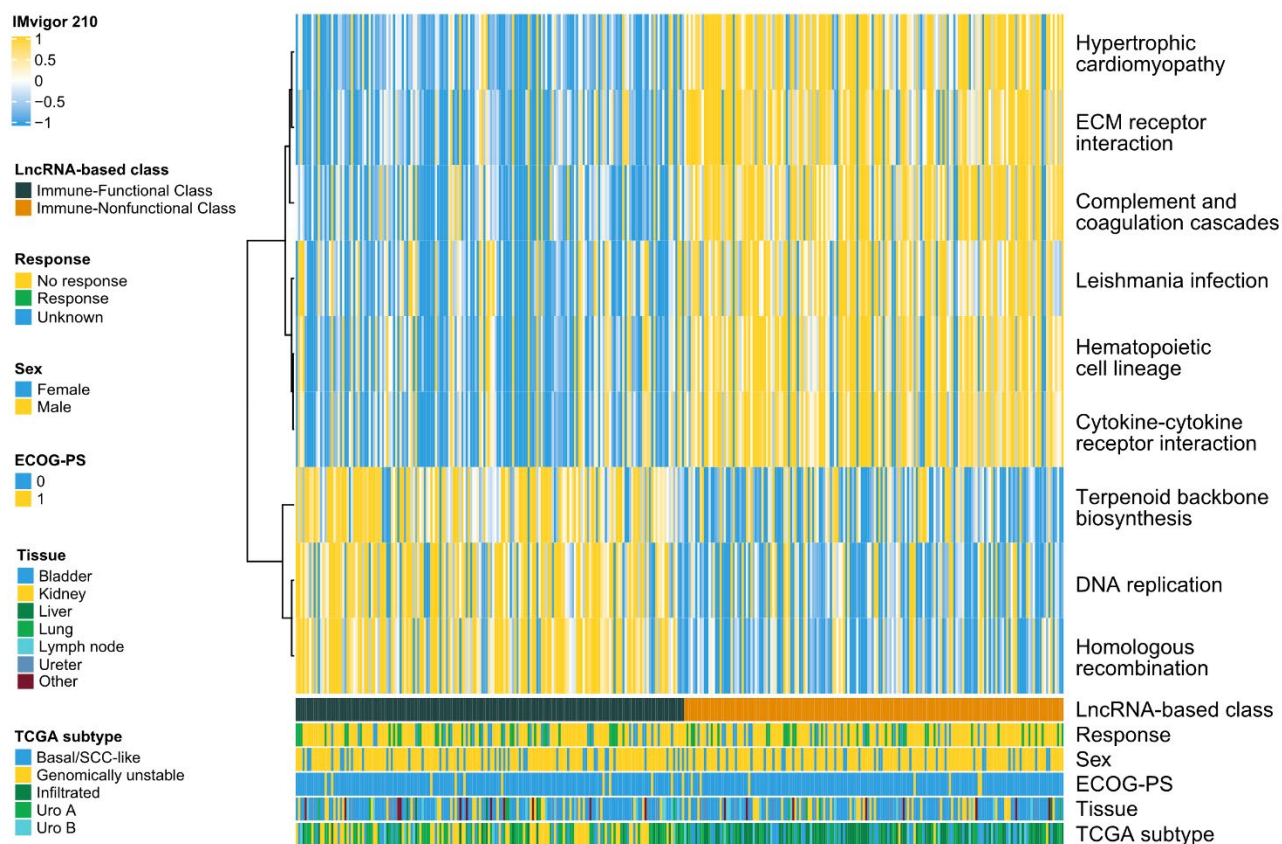

Each row of the heatmap represented a signaling pathway. Each column represented a patient. The color indicates the level of expression; the color near to yellow indicates high expression, whereas the color near blue indicates low expression. LncRNA, long non-coding RNA; ECOG-PS, Eastern Cooperative Oncology Group Performance Status; TCGA, The Cancer Genome Atlas; ECM, extracellular matrix; SCC, squamous cell carcinoma.

**eFigure 6. Identification of Essential lncRNAs in the Clustering in IMvigor210 Trial.**

**A. Application of LASSO algorithm**

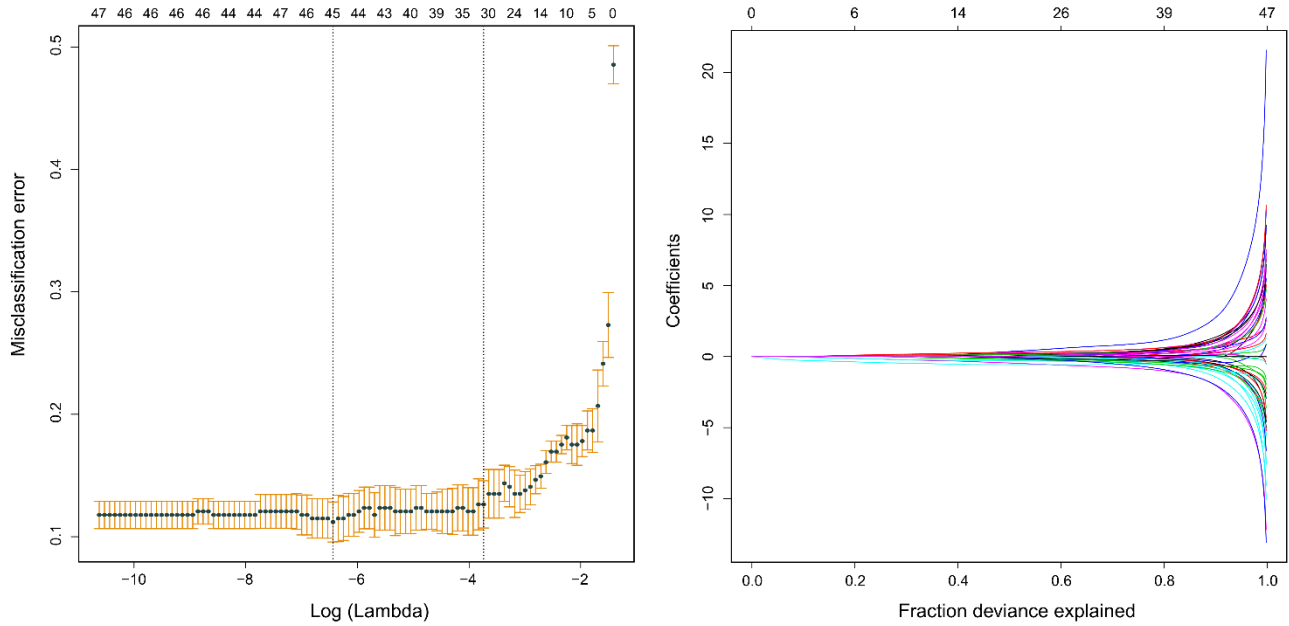

**B. Application of random forest method**

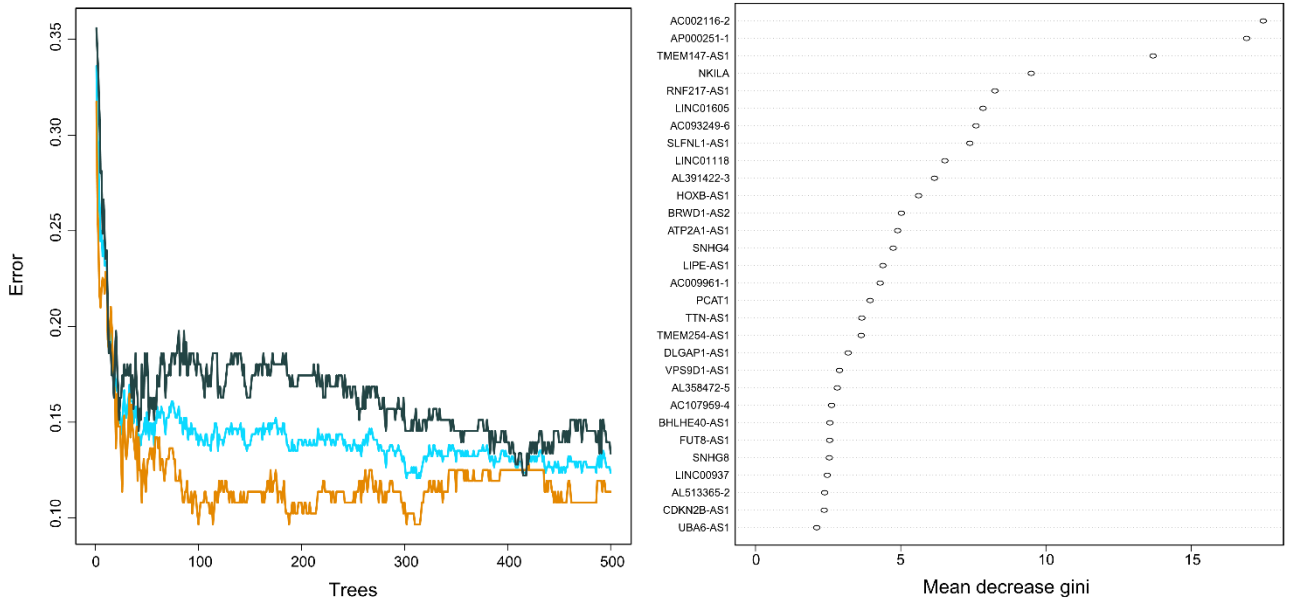

A, Application of LASSO algorithm. B, Application of random forest method. We processed 49 lncRNAs with LASSO algorithm and narrowed down the selection to 32 lncRNAs. Then, we used random forest method to rank the importance of these 32 lncRNAs. Higher scores of mean decrease gini indicated greater importance.



## eFigure 7. Gene Expression Analysis Between Immune-Functional and Immune-Nonfunctional Classes in IMvigor210 Trial.

A. Gene expression between Immune-Functional and -Nonfunctional Classes

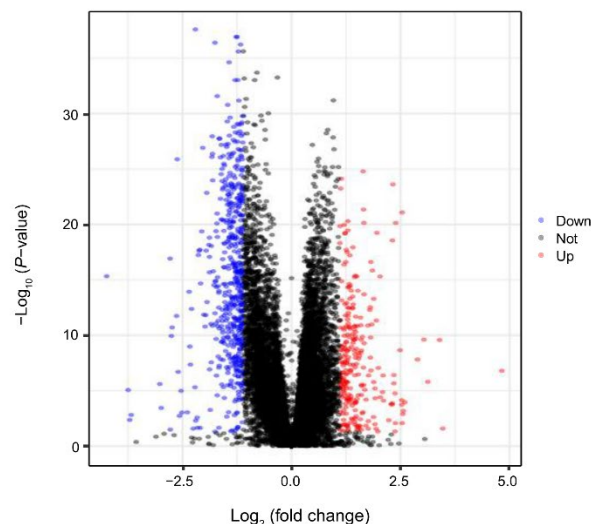

B. Heatmap representation of differentially expressed genes

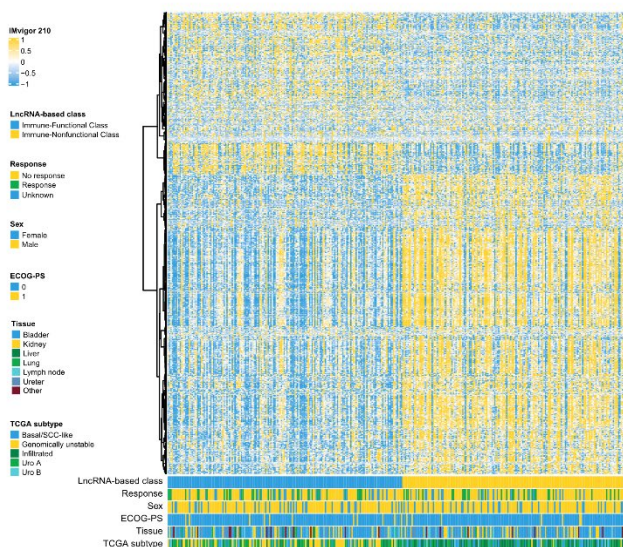

A, Volcano plot showing the gene information between the two classes. B, Heatmap representation of differentially expressed genes between the two classes. Volcano plot plotted fold-change versus significance on the x and y axes, respectively. Each dot on the plot represented one gene. Genes with absolute  $\log_2(\text{foldchange})$  values larger than the estimated cutoff value 1.11 and  $P$  values less than .05 were defined as differentially expressed genes between Immune-Functional Class and Immune-Nonfunctional Class. We identified 778 differentially expressed genes between the two classes, of which 259 genes were up-regulated in Immune-Functional Class (Red dots) and 519 genes were up-regulated in Immune-Nonfunctional Class (Blue dots). The black dots indicated genes that were not significantly differentially expressed between the two classes. Each row of the heatmap represented a gene. Each column represented a patient. The color indicates the level of expression; the color near to yellow indicates high expression, whereas the color near blue indicates low expression. LncRNA, long non-coding



---

RNA; ECOG-PS, Eastern Cooperative Oncology Group Performance Status; TCGA, The Cancer Genome Atlas; SCC, squamous cell carcinoma.

**eFigure 8.** Gene Set Enrichment Analysis of NF- $\kappa$ B Pathway Between Immune-Functional and Immune-Nonfunctional Classes in IMvigor210 Trial.

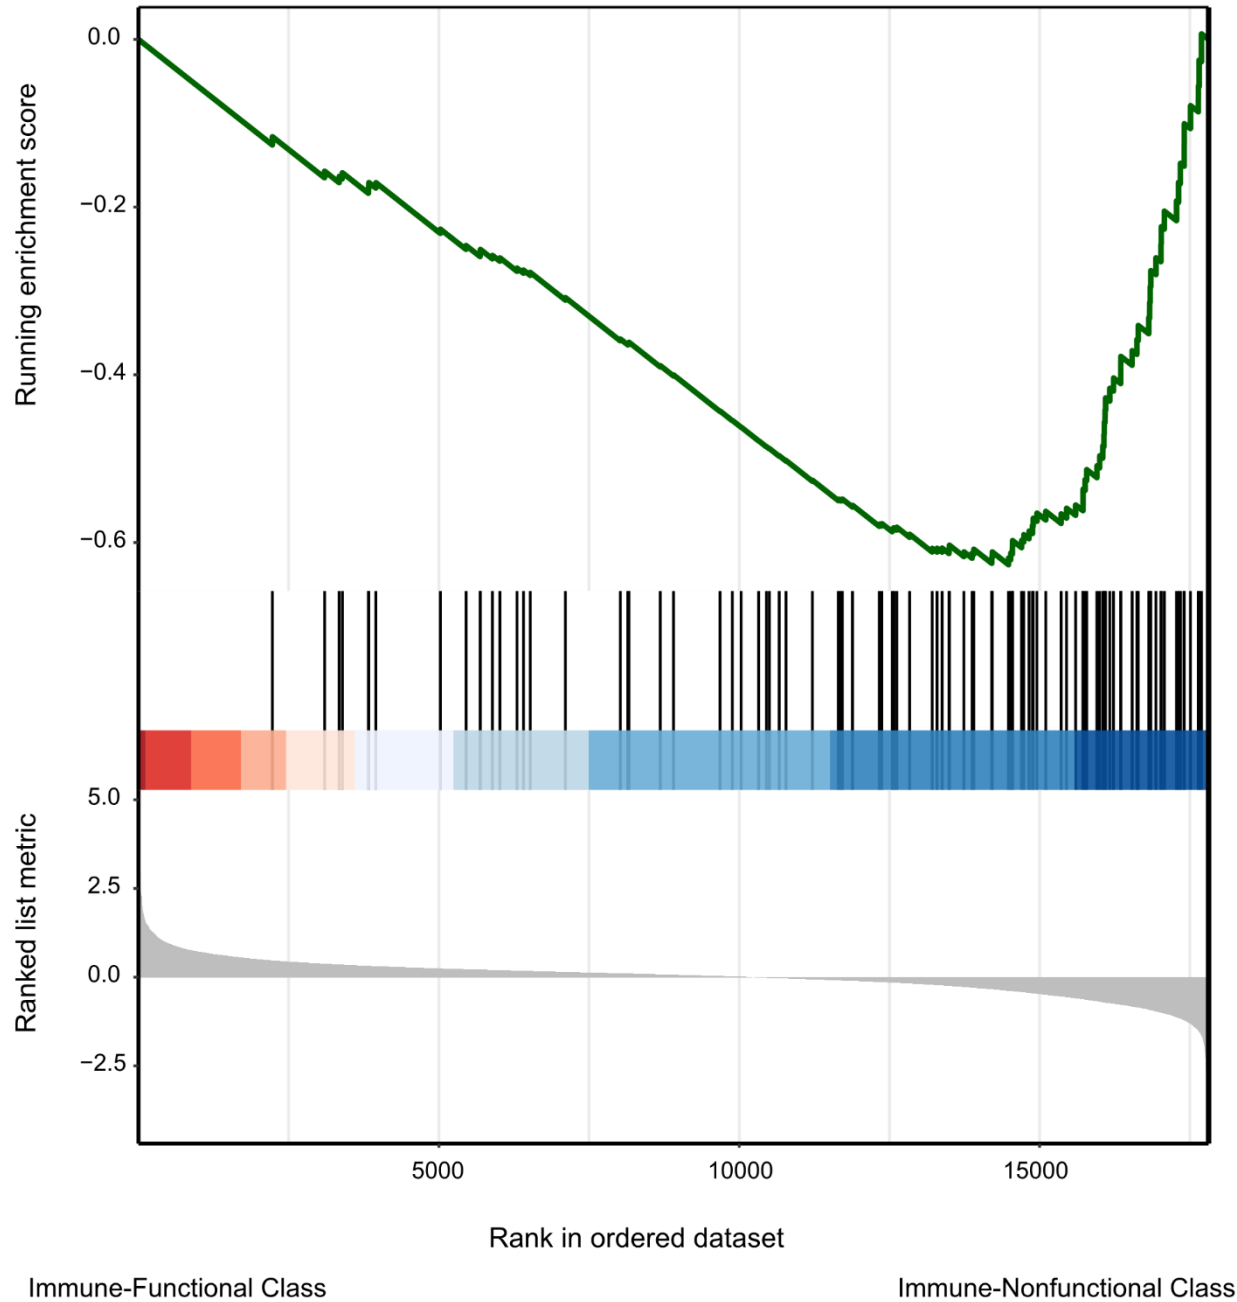

Enrichment score was negative, and vertical black solid lines in the middle of the figure were densely grouped in the right-end, indicating that most genes were low-ranked in NF- $\kappa$ B-related gene set. The results demonstrated that NF- $\kappa$ B-related gene set were highly enriched in Immune Functional Class over Immune-Nonfunctional Class.

**eFigure 9.** Matrix Plot Showing the Correlation of NKILA Expression With Signaling Pathways in IMvigor210 Trial.

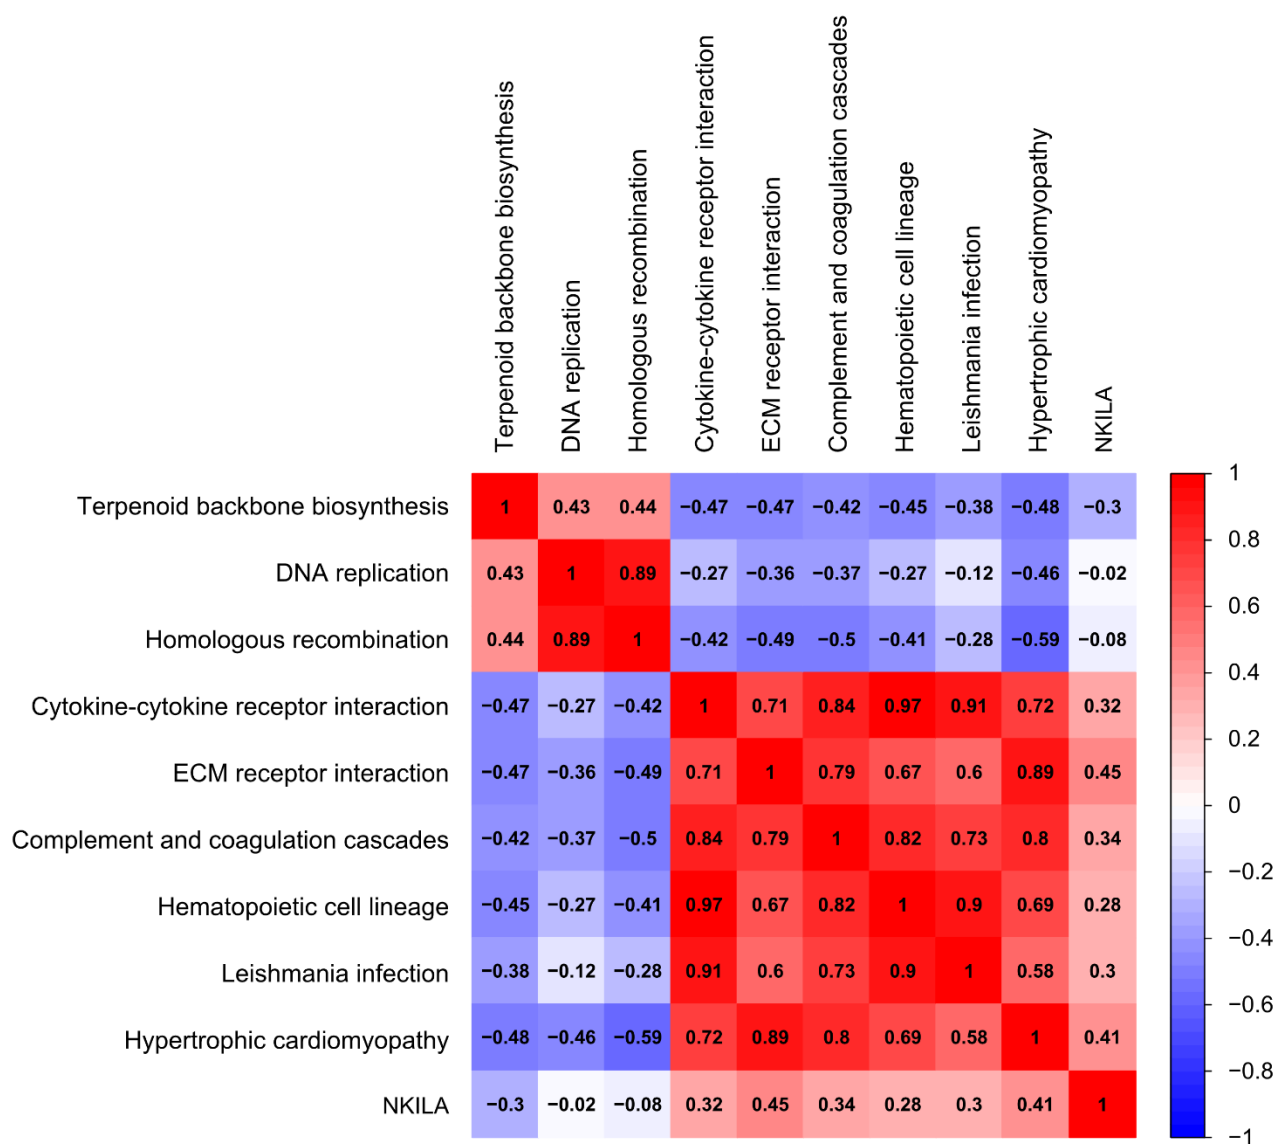

The pathways used here were consistent with those in gene set variation analysis in Immune-Functional and Immune-Nonfunctional Classes. NKILA was found to have consistent enrichment pattern with Immune-Nonfunctional Class. The correlations here were estimated using Pearson  $\rho$ . ECM, extracellular matrix.

**eFigure 10.** KEGG Pathway Enrichment Analysis of NKILA in IMvigor210 Trial.

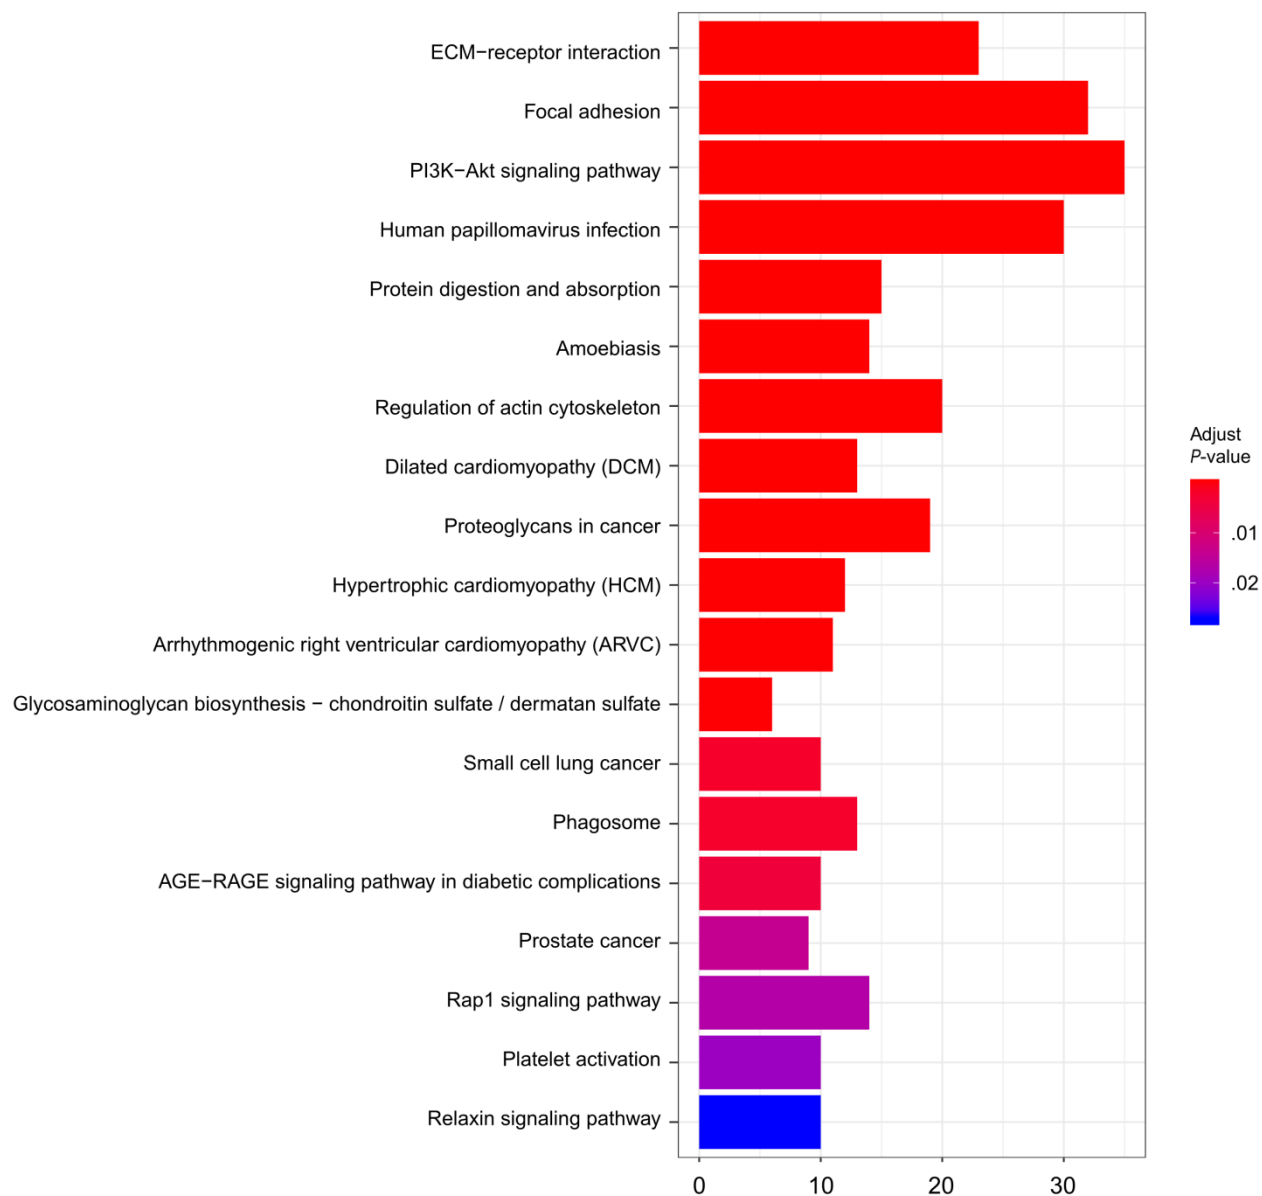

Kyoto Encyclopedia of Genes and Genomes Pathway enrichment analyses showed that NKILA displayed high enrichment in biological processes such as ECM-receptor interaction. ECM, extracellular matrix; KEGG, Kyoto Encyclopedia of Genes and Genomes.

**eFigure 11.** Gene Ontology Enrichment Analysis of NKILA in IMvigor210 Trial.

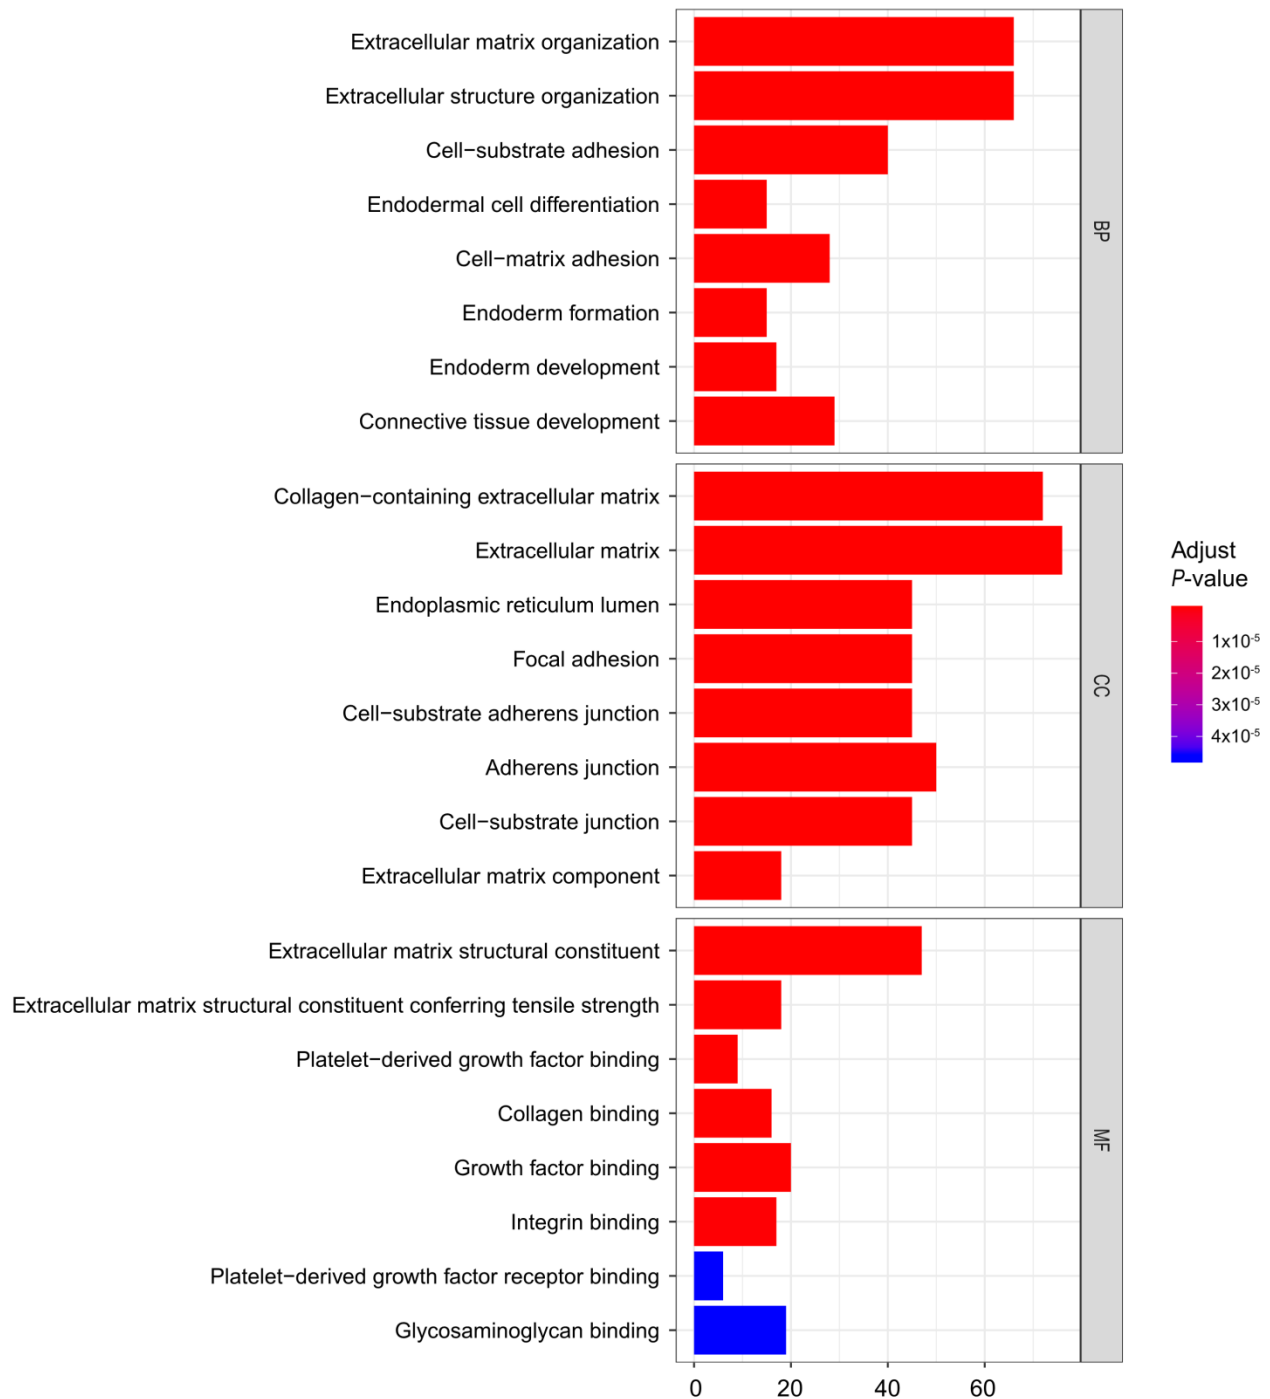

Gene Ontology enrichment analyses showed that NKILA displayed high enrichment in extracellular matrix (ECM)-related biological processes, cellular components, and molecular functions, including ECM-receptor interaction, ECM organization, ECM component, ECM structural constituent, and ECM structural constituent conferring tensile strength.

**eFigure 12.** NKILA Expression in Immune-Functional Class Versus Immune-Nonfunctional Class in IMvigor210 Trial.

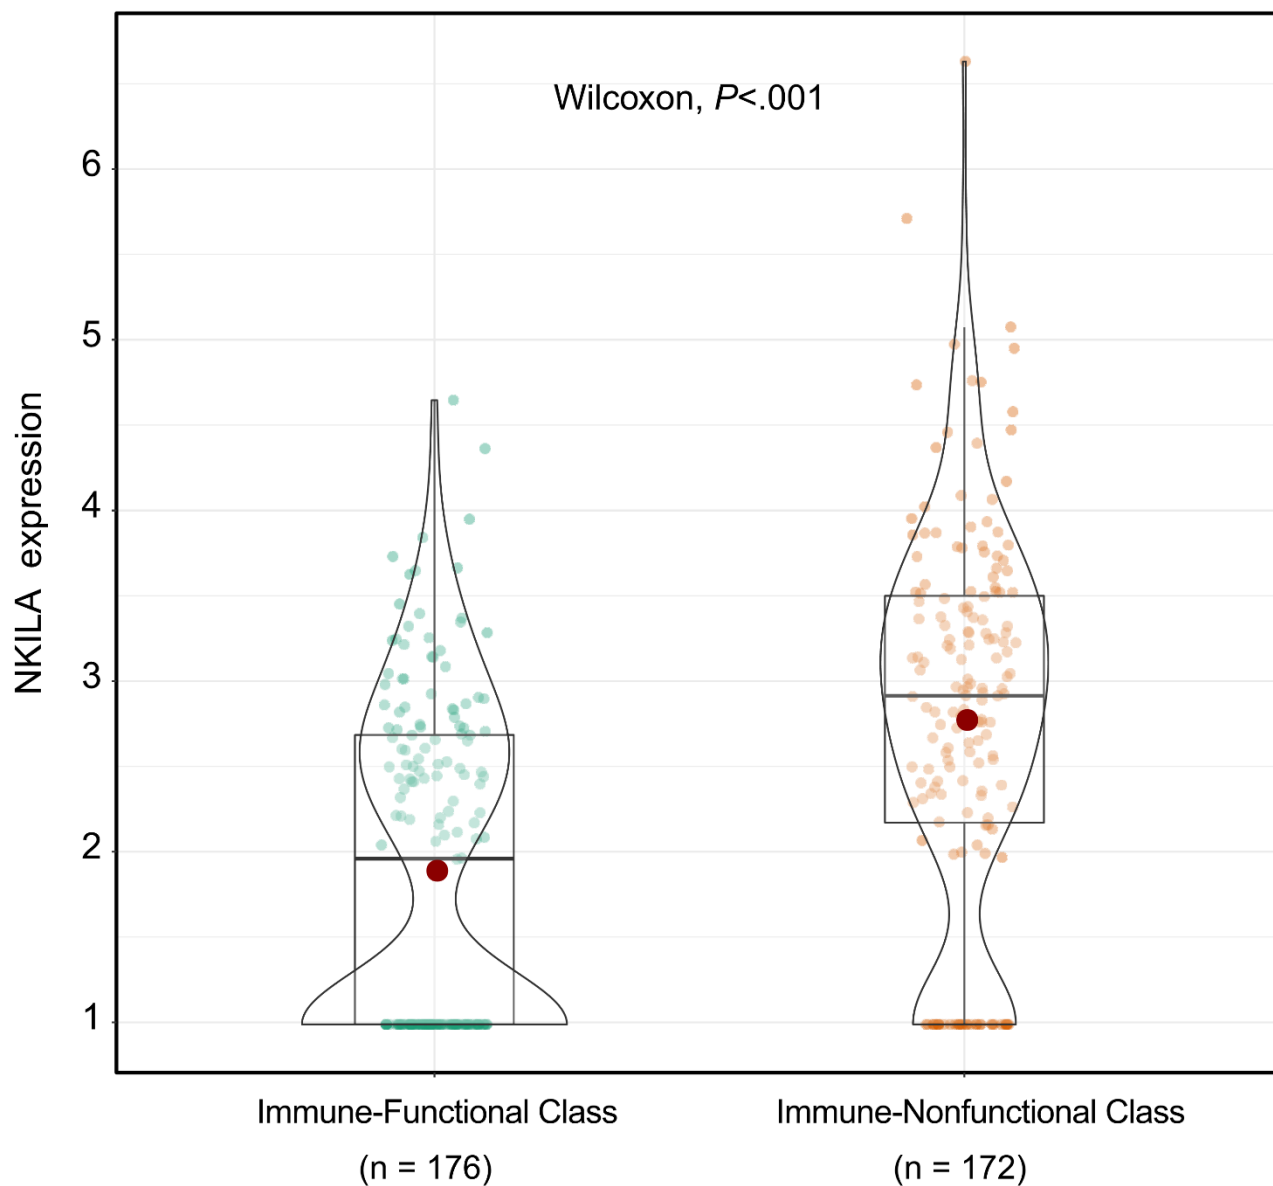

NKILA was significantly lower in Immune-Functional Class than in Immune-Nonfunctional Class.

**eFigure 13. Association of LncRNA-Based Class with Overall Survival in Pancancer.**

**A. Lung squamous cell carcinoma**

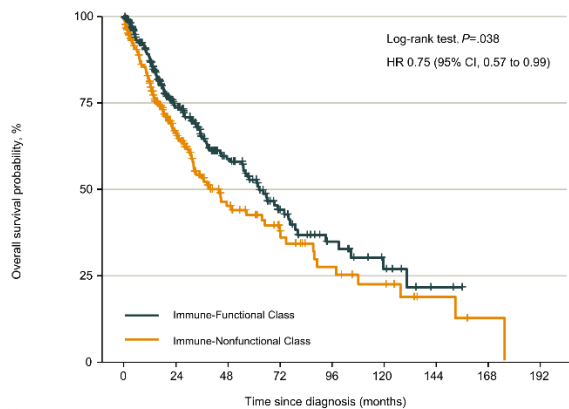

No at risk

|                      |     |     |    |    |    |   |   |   |   |
|----------------------|-----|-----|----|----|----|---|---|---|---|
| Immune-Functional    | 246 | 124 | 66 | 34 | 18 | 9 | 3 | 0 | 0 |
| Immune-Nonfunctional | 247 | 105 | 44 | 22 | 10 | 8 | 2 | 1 | 0 |

**B. Bladder cancer**

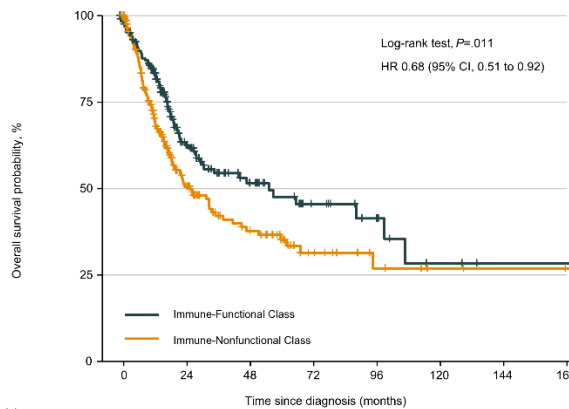

No at risk

|                      |     |    |    |    |   |   |   |   |
|----------------------|-----|----|----|----|---|---|---|---|
| Immune-Functional    | 206 | 74 | 35 | 15 | 8 | 3 | 1 | 1 |
| Immune-Nonfunctional | 200 | 65 | 34 | 13 | 6 | 3 | 2 | 1 |

**C. Melanoma**

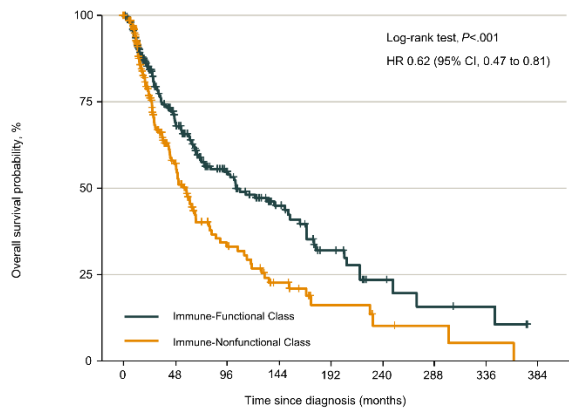

No at risk

|                      |     |     |    |    |    |   |   |   |   |
|----------------------|-----|-----|----|----|----|---|---|---|---|
| Immune-Functional    | 254 | 132 | 70 | 37 | 17 | 7 | 4 | 3 | 0 |
| Immune-Nonfunctional | 203 | 67  | 29 | 14 | 6  | 3 | 2 | 1 | 0 |



---

A, Lung squamous cell carcinoma. B, Bladder cancer. C, Melanoma. HR, hazard ratio; CI, confidence interval.

**eFigure 14.** Association of NKILA Expression with Overall Survival in Pancancer.

**A. Lung adenocarcinoma**

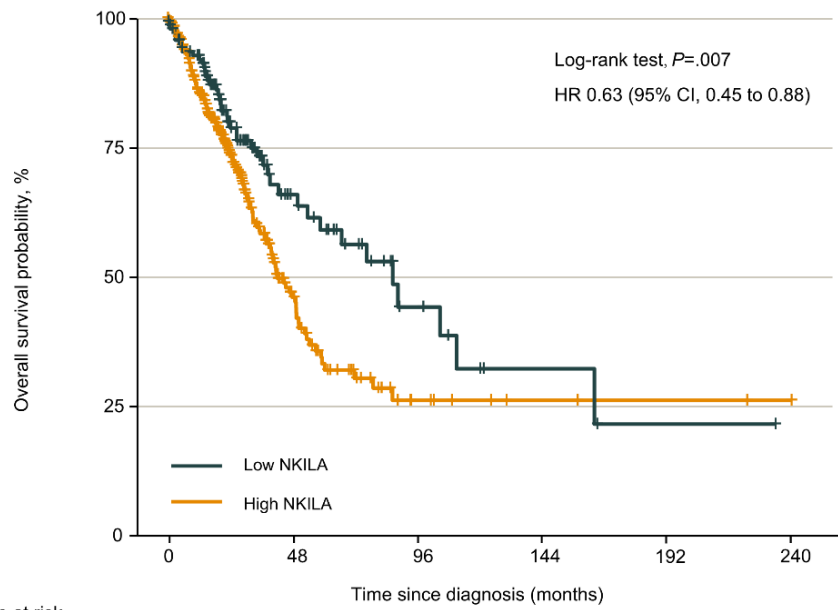

No at risk

|            |     |    |   |   |   |   |
|------------|-----|----|---|---|---|---|
| Low NKILA  | 142 | 30 | 9 | 3 | 1 | 0 |
| High NKILA | 371 | 50 | 8 | 3 | 2 | 1 |

**B. Lung squamous cell carcinoma**

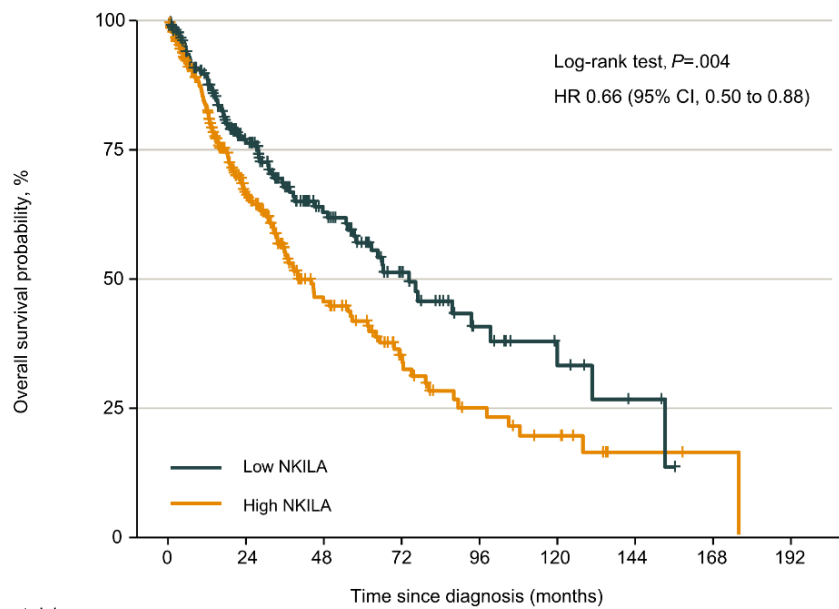

No at risk

|            |     |     |    |    |    |   |   |   |   |
|------------|-----|-----|----|----|----|---|---|---|---|
| Low NKILA  | 205 | 113 | 58 | 30 | 14 | 8 | 3 | 0 | 0 |
| High NKILA | 288 | 116 | 52 | 26 | 14 | 9 | 2 | 1 | 0 |

---

A, Lung adenocarcinoma. B, Lung squamous cell carcinoma. HR, hazard ratio; CI, confidence interval.

**eFigure 15. Association of Cytotoxic T Lymphocytes with Overall Survival.**

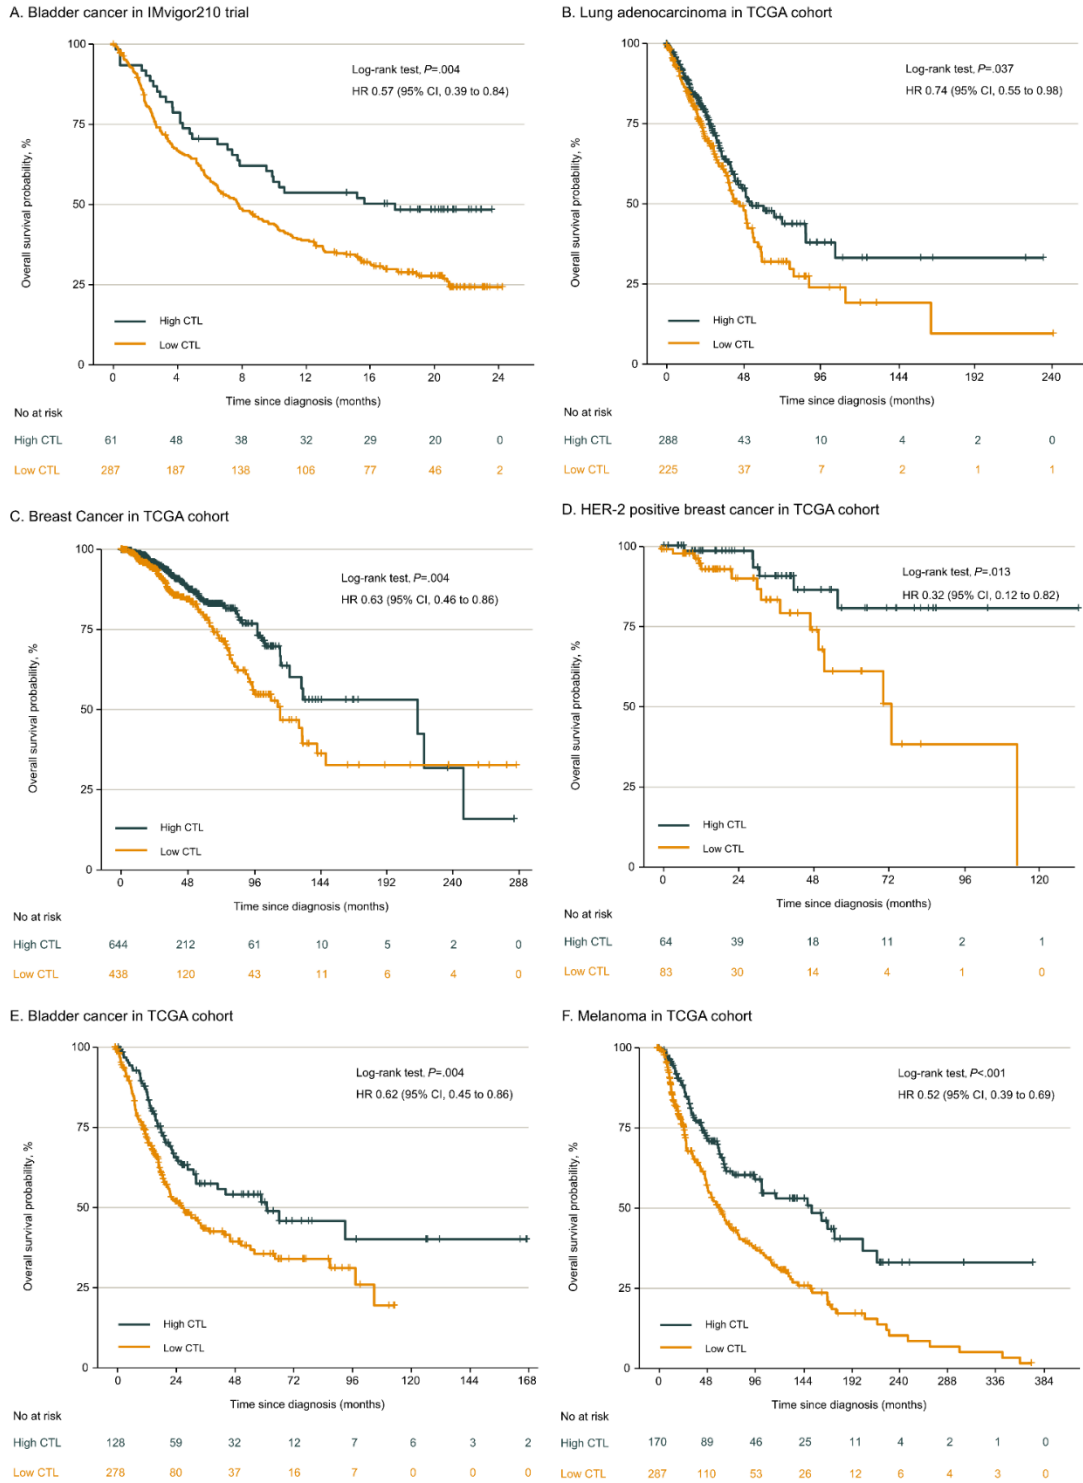

A, Bladder cancer in IMvior210 trial. B, lung adenocarcinoma in TCGA cohort. C, Breast Cancer in TCGA cohort. D, HER-2 positive breast cancer in TCGA cohort. E, Bladder cancer in TCGA cohort. F, Melanoma in TCGA cohort. HR, hazard ratio; CI, confidence interval; CTL,

---

cytotoxic T lymphocyte; TCGA, The Cancer Genome Atlas.

**eFigure 16.** Correlations Between Cytotoxic T Lymphocytes and Various Immune Molecules in IMvigor210 Trial.

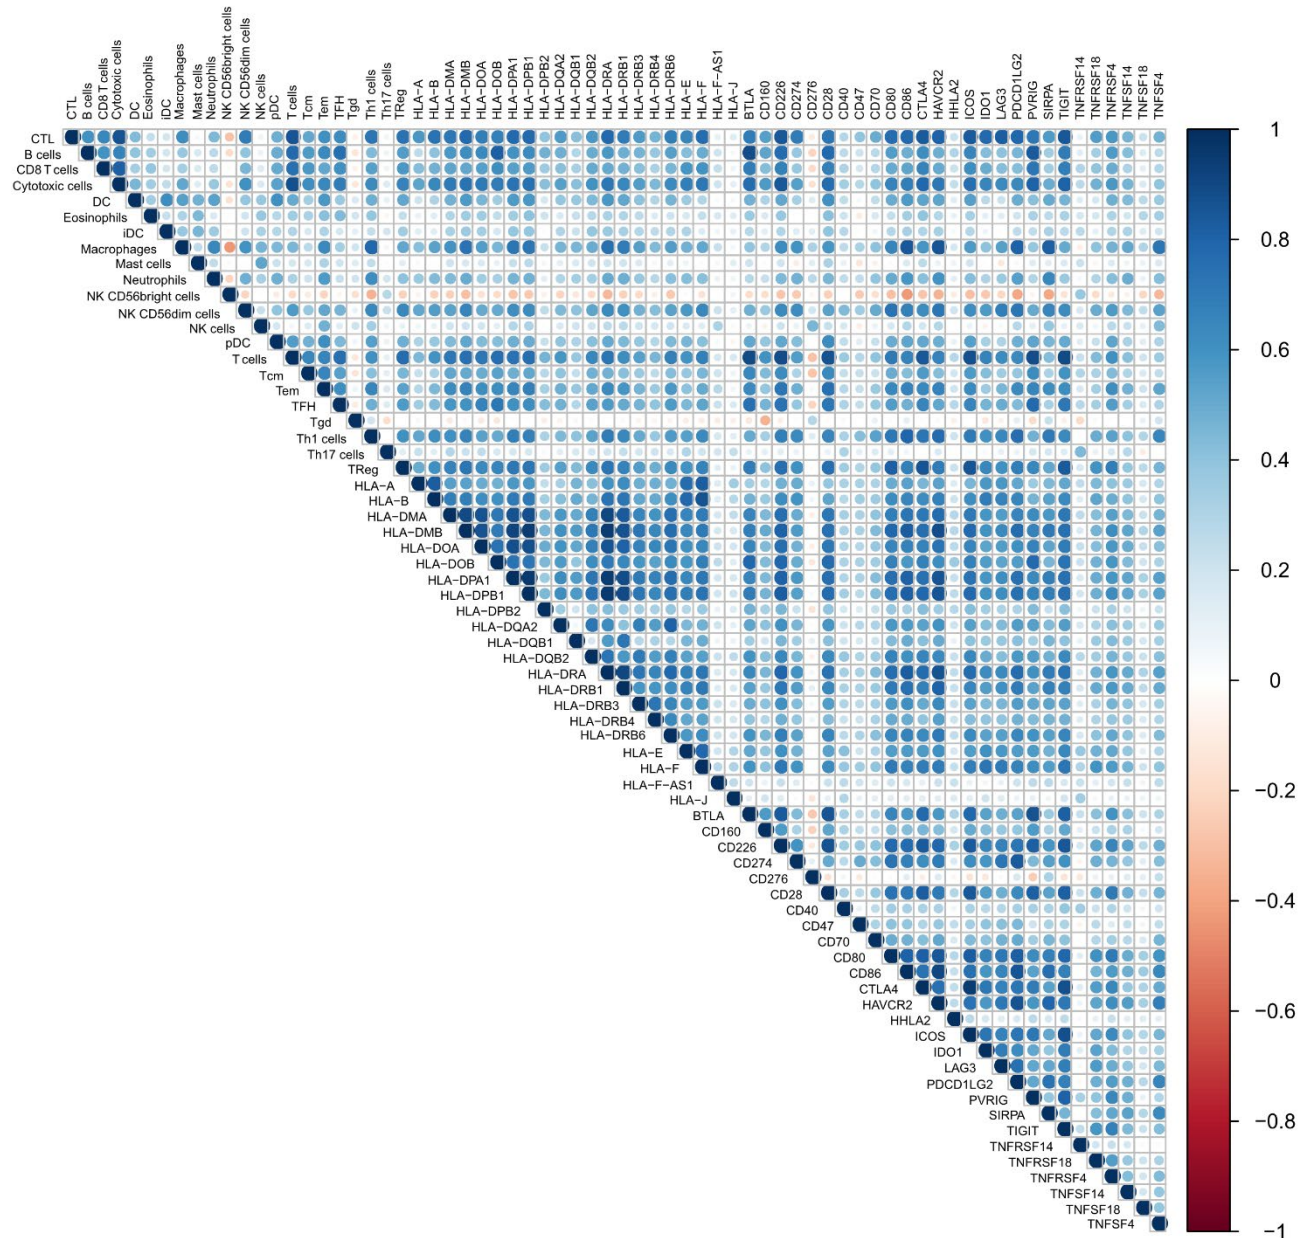

CTL was closely correlated with multiple immune molecules including immune cells such as B cells, CD8 T cells, cytotoxic cells, dendritic cells, macrophages, neutrophils, T cells, natural killer cells, and type 1 T helper cells, central memory T cells, effector memory T cells, plasmacytoid dendritic cell, T follicular helper cells, and regulatory cells; immune checkpoints such as BTLA, CD160, CD226, CD274, CD28, CD70, CD80, CD86, HAVCR2, ICOS, IDO1, CTLA4, LAG3, PDCD1LG2, PVRIG, SIRPA, and TIGIT; and human leukocyte antigens such as HLA-A, HLA-B, HLA-DMA, HLA-DMB, HLA-DOA, HLA-DOB, HLA-DPA1, HLA-DPB1, HLA-DQA2, HLA-DRA, HLA-DRB1, HLA-DRB3, HLA-DRB4, HLA-DRB6, HLA-E, and HLA-F. HLA, human leukocyte antigen; DC, dendritic cell; NK, natural killer; Th, helper T; Tcm, central memory T cells; Tem, effector memory T cells, pDC, plasmacytoid dendritic cell, TFH, T follicular helper cells; TReg, regulatory cells.

**eFigure 17.** Objective Response Rate Stratified by lncRNAs and Infiltration of Cytotoxic T Lymphocytes.

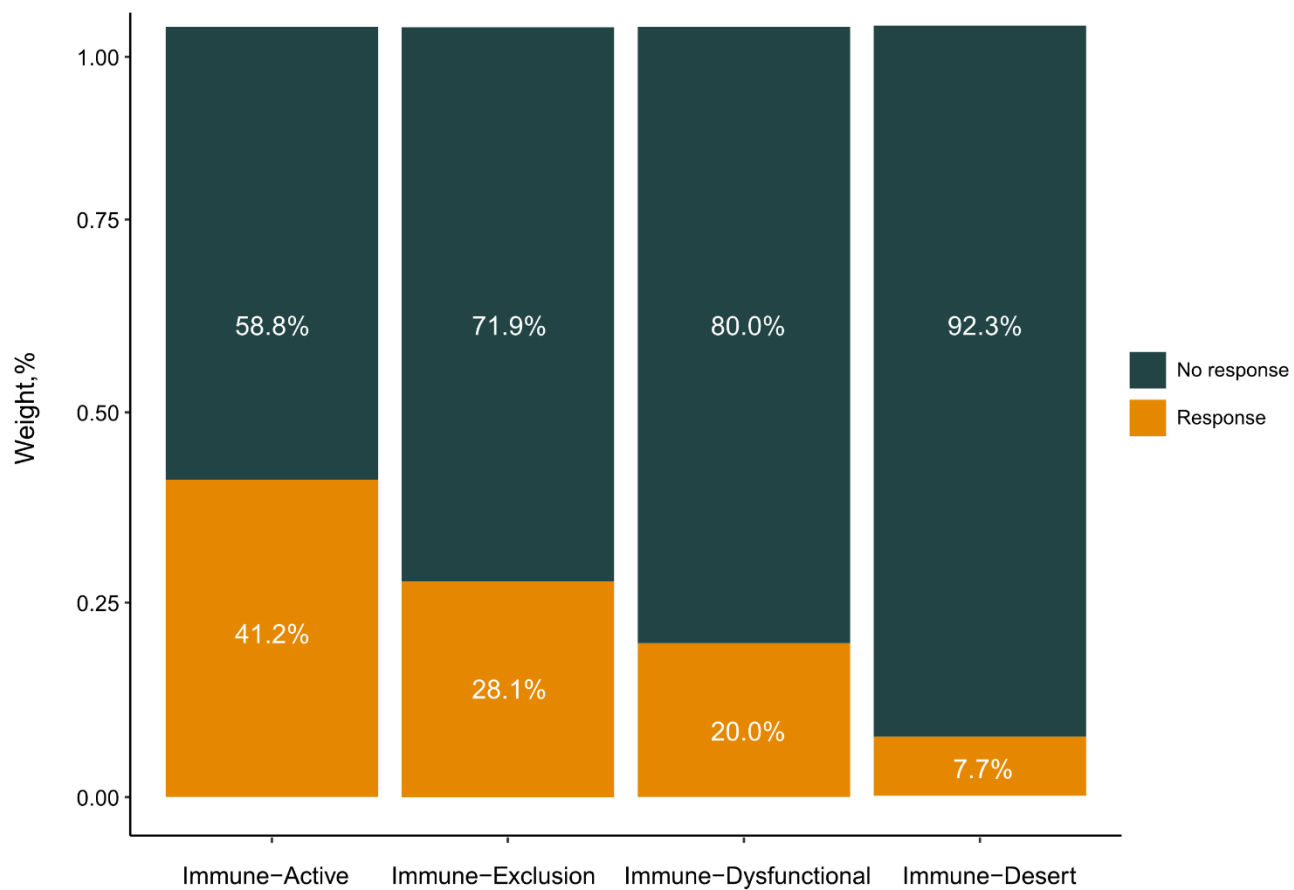



**eFigure 18.** Association of LncRNA-CTL-Based Class with Immune Molecular Expression in IMvigor210 Trial.

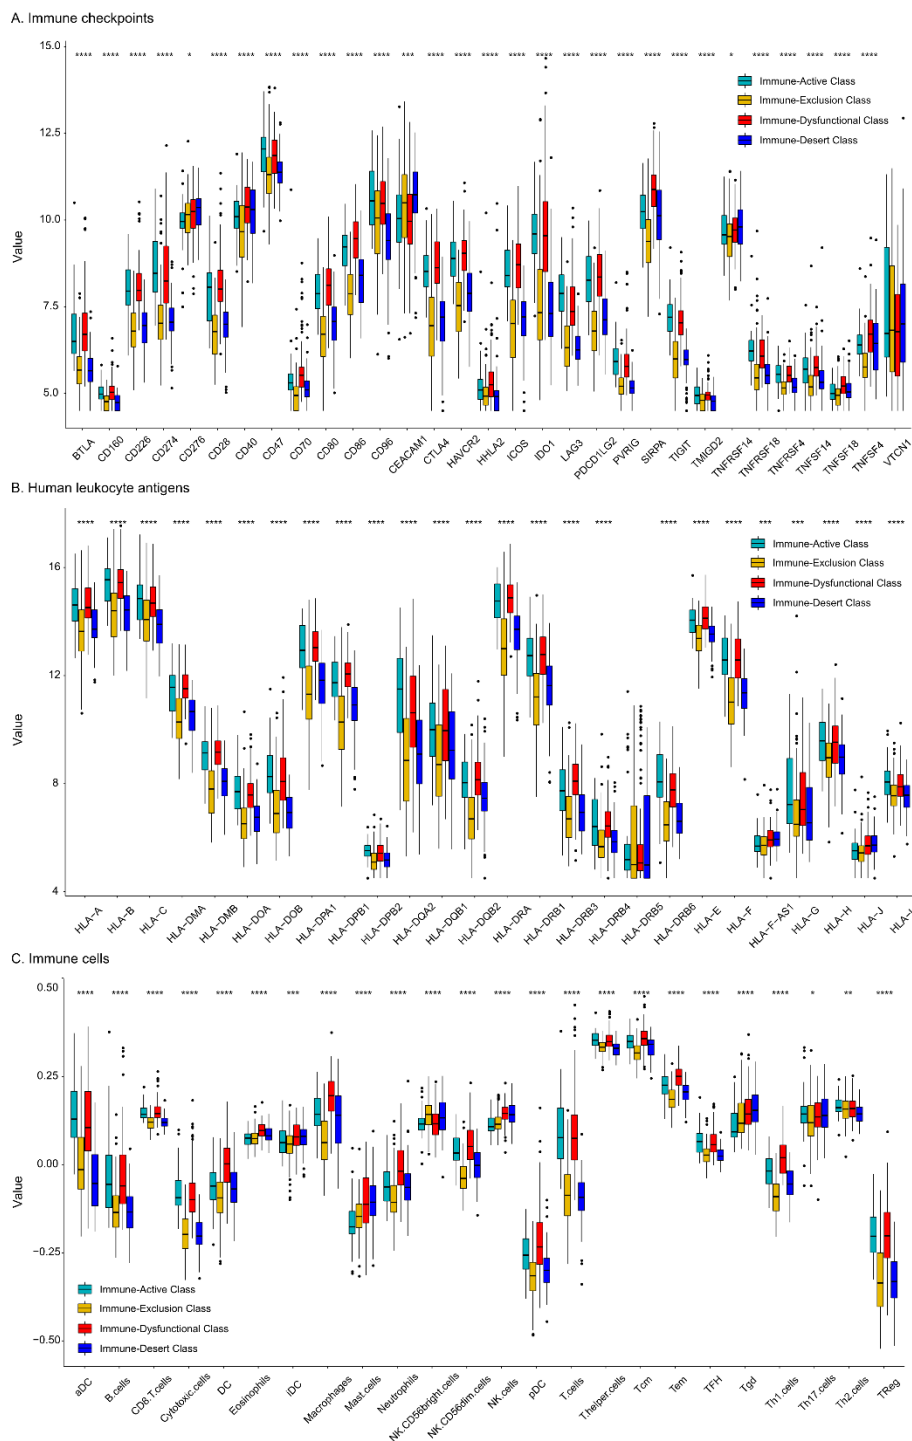

A, Immune checkpoints. B, Human leukocyte antigens. C, Immune cells. HLA, human leukocyte antigen; DC, dendritic cell; NK, natural killer; Th, helper T; Tcm, central memory T cells; Tem, effector memory T cells; pDC, plasmacytoid dendritic cell, TFH, T follicular helper cells; TReg,

---

regulatory cells.

**eFigure 19.** Immune Molecular Expression Pattern of LncRNA-CTL-Based Classes in TCGA Bladder Cancer Cohort.

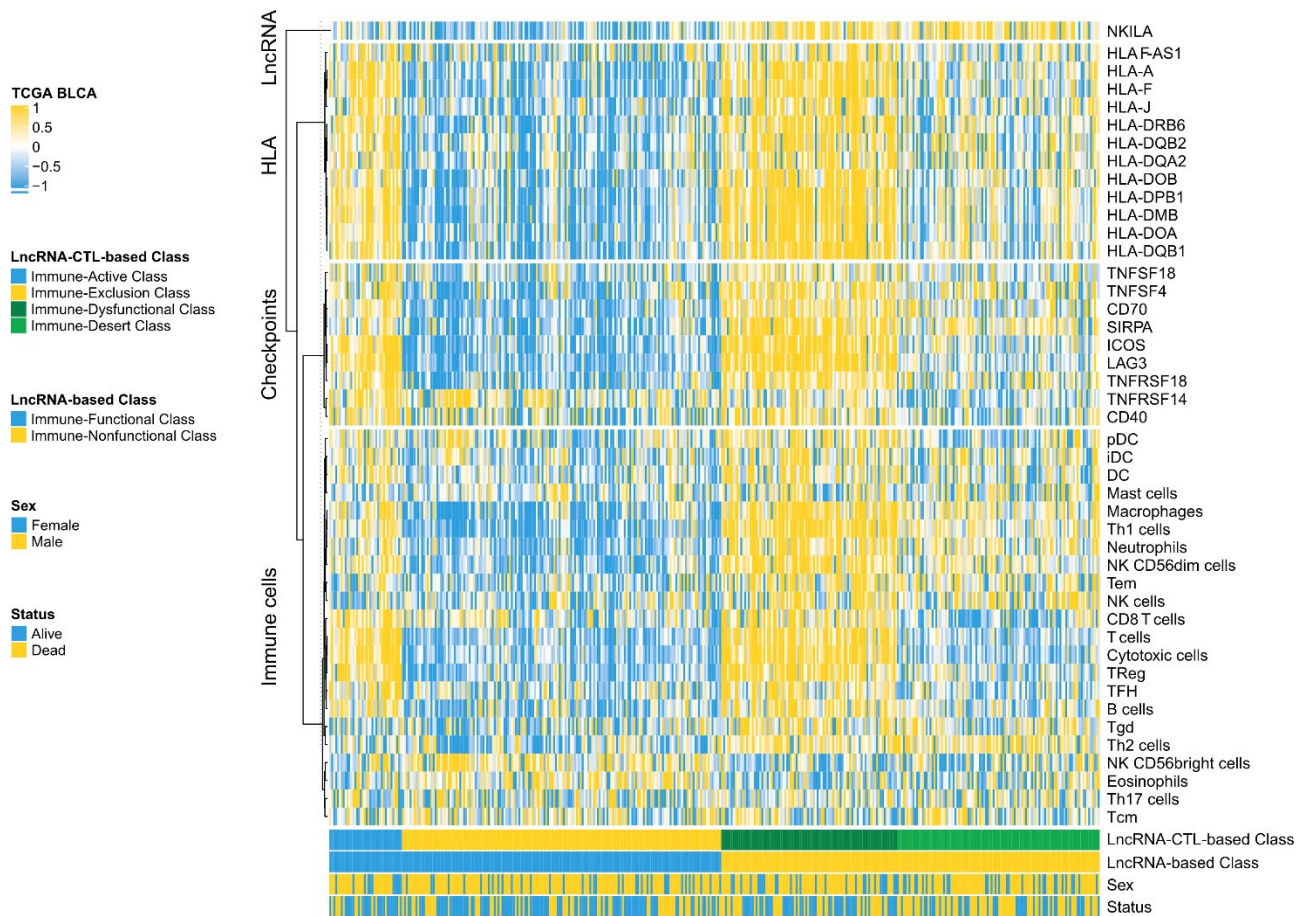

Each row of the heatmap represented an immune molecule or an immune cell. Each column represented a patient. The color indicates the level of expression; the color near to yellow indicates high expression, whereas the color near blue indicates low expression. We combined CTL expression and lncRNA signature to in-depth categorize patients with bladder cancer in TCGA cohort into four subsets. Consistent with the findings in IMvigor210 trial, Immune-Active Class and Immune-Dysfunctional Class generally characterized by higher expressions of immune cells, immune checkpoints and human leukocyte antigens, compared to Immune-Exclusion Class and Immune-Desert Class. LncRNA, long non-coding RNA; ECOG-PS, Eastern Cooperative Oncology Group Performance Status; CTL, cytotoxic T lymphocyte; BLCA, bladder cancer; HLA, human leukocyte antigen; DC, dendritic cell; NK, natural killer; Th, helper T; Tcm, central memory T cells; Tem, effector memory T cells, pDC, plasmacytoid dendritic cell, TFH, T follicular helper cells; TReg, regulatory cells.

**eFigure 20.** Weighted Gene Co-Expression Network Analysis of Four LncRNA-CTL-Based Classes in IMvigor210 Trial.

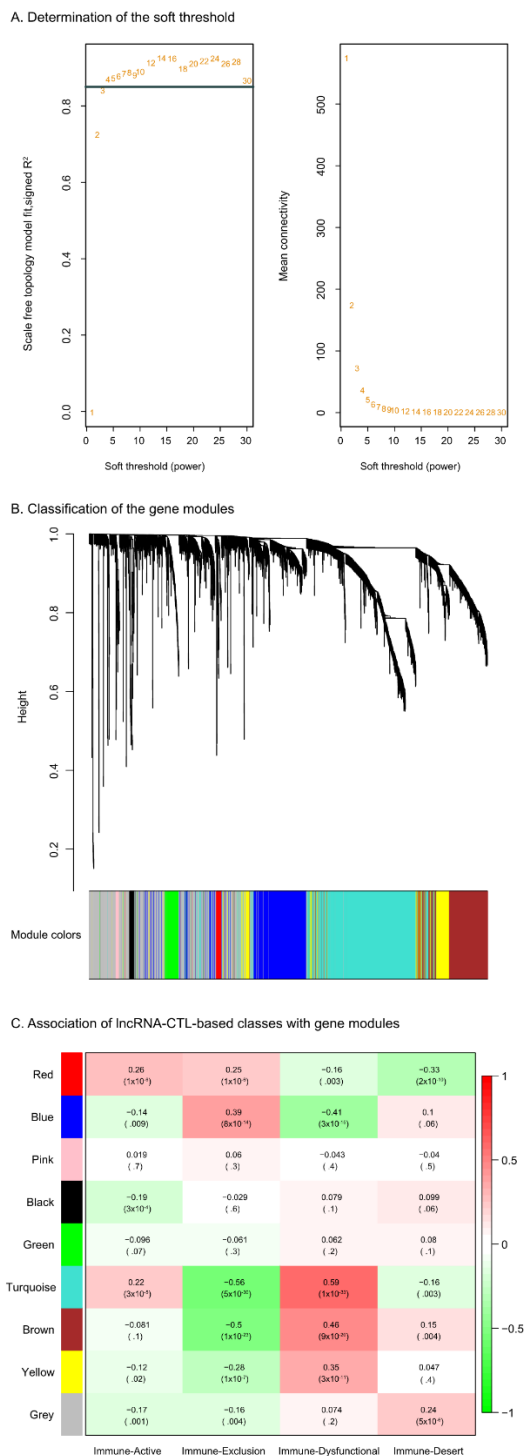

A, Determination of the soft threshold (power value). B, Classification of gene modules. C, Matrix plot showing the degree of association of Immune-Active Class, Immune-Exclusion Class, Immune-Dysfunctional Class, and Immune-Desert Class with gene modules. LncRNA, long

---

non-coding RNA; CTL, cytotoxic T lymphocyte.

**eFigure 21.** KEGG Pathway Enrichment Analysis of Four LncRNA-CTL-Based Classes in IMvigor210 Trial.

A. Immune-Active Class

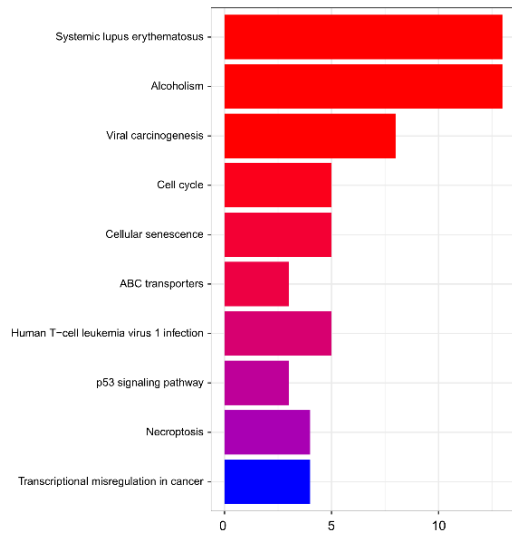

B. Immune-Exclusion Class

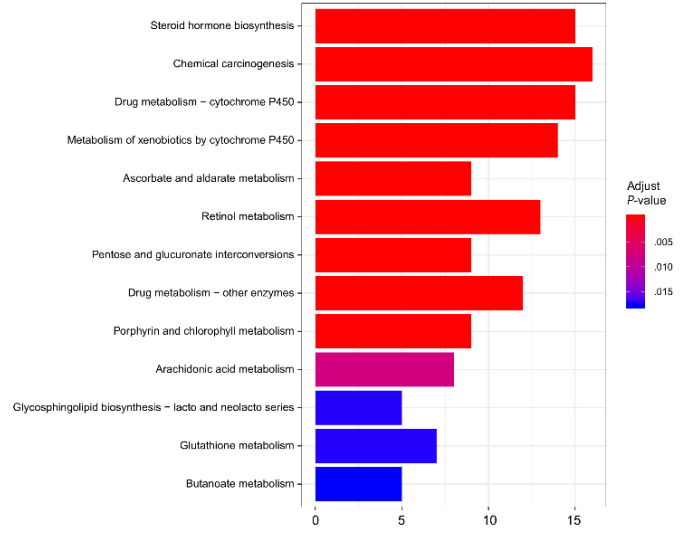

C. Immune-Dysfunctional Class

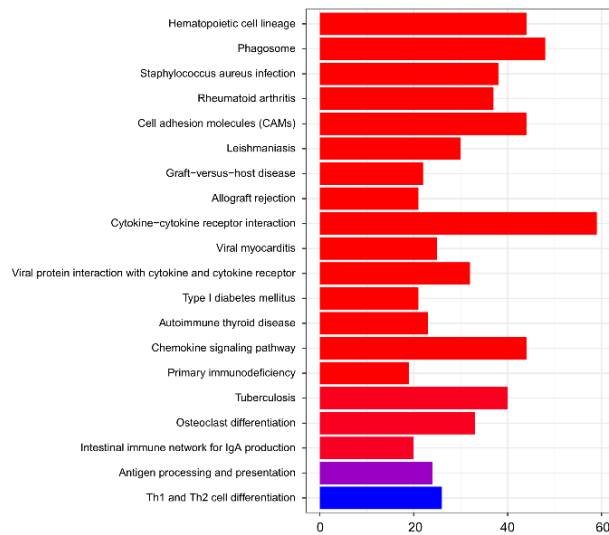

D. Immune-Desert Class

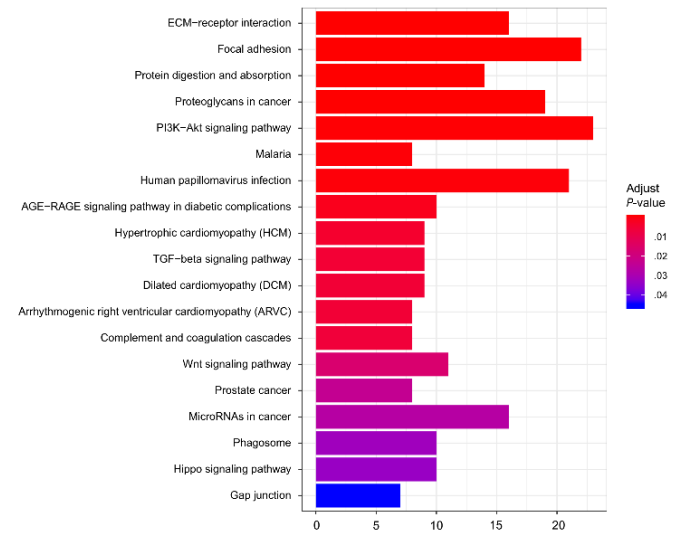

A, Immune-Active Class. B, Immune-Exclusion Class. C, Immune-Dysfunctional Class. D, Immune-Desert Class. Immune-Active Class was significantly involved in cell cycle and p53 signaling pathway; Immune-Exclusion Class was actively involved in various physiological and pathological metabolism; Immune-Dysfunctional Class was involved in phagosome, primary immunodeficiency, and Th1 and Th2 cell differentiation; and Immune-Desert Class showed enrichment in ECM-receptor interaction and PI3K-Akt signaling pathway. KEGG, Kyoto Encyclopedia of Genes and Genomes.

**eFigure 22. Gene Ontology Pathway Enrichment Analysis of Four LncRNA-CTL-Based Classes in IMvigor210 Trial.**

**A. Immune-Active Class**

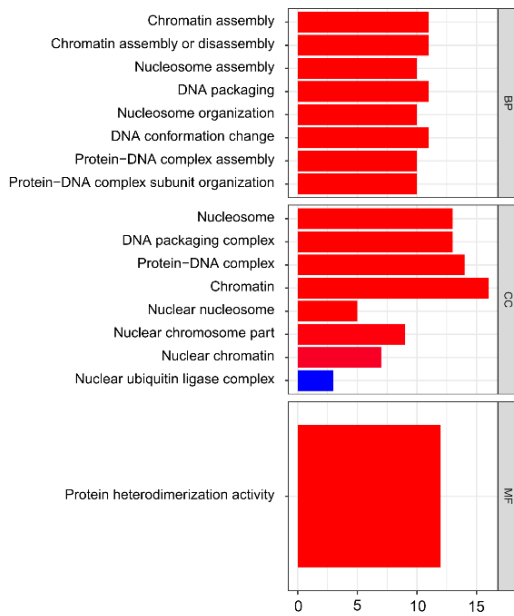

**B. Immune-Exclusion Class**

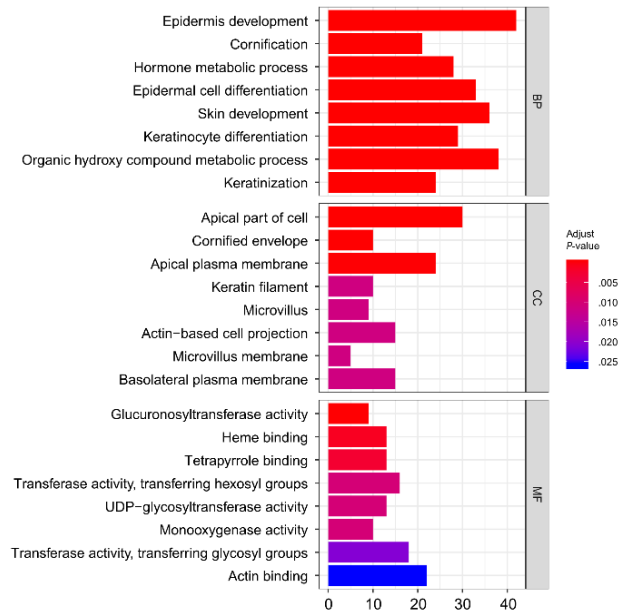

**C. Immune-Dysfunctional Class**

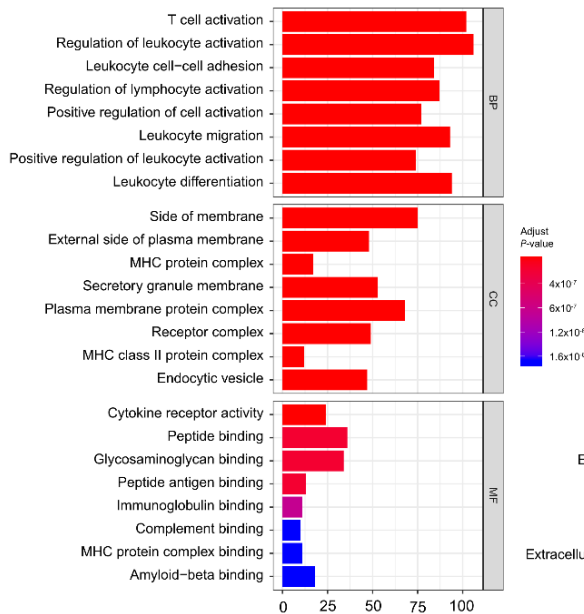

**D. Immune-Desert Class**

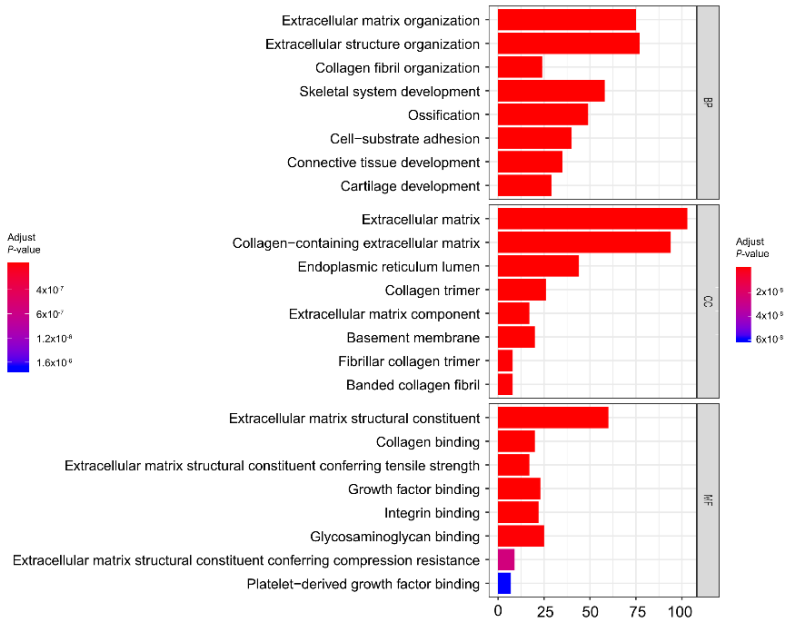

A, Immune-Active Class. B, Immune-Exclusion Class. C, Immune-Dysfunctional Class. D, Immune-Desert Class. Immune-Active Class was significantly enriched of genomic biological processes such as chromatin assembly or disassembly, nucleosome assembly, DNA packaging, nucleosome organization, and DNA conformation change; Immune-Exclusion Class was actively enriched of epithelial change such as epidermis development, cornification, keratinization, and epidermal cell or keratinocyte differentiation; Immune-Dysfunctional Class was enriched of immunologic processes such as activation of T cell and leukocyte; and Immune-Desert Class showed enrichment in ECM-related



---

processes such as ECM organization and extracellular structure organization.

**eFigure 23.** Identification of the Optimal Cutoff For LncRNA Score.

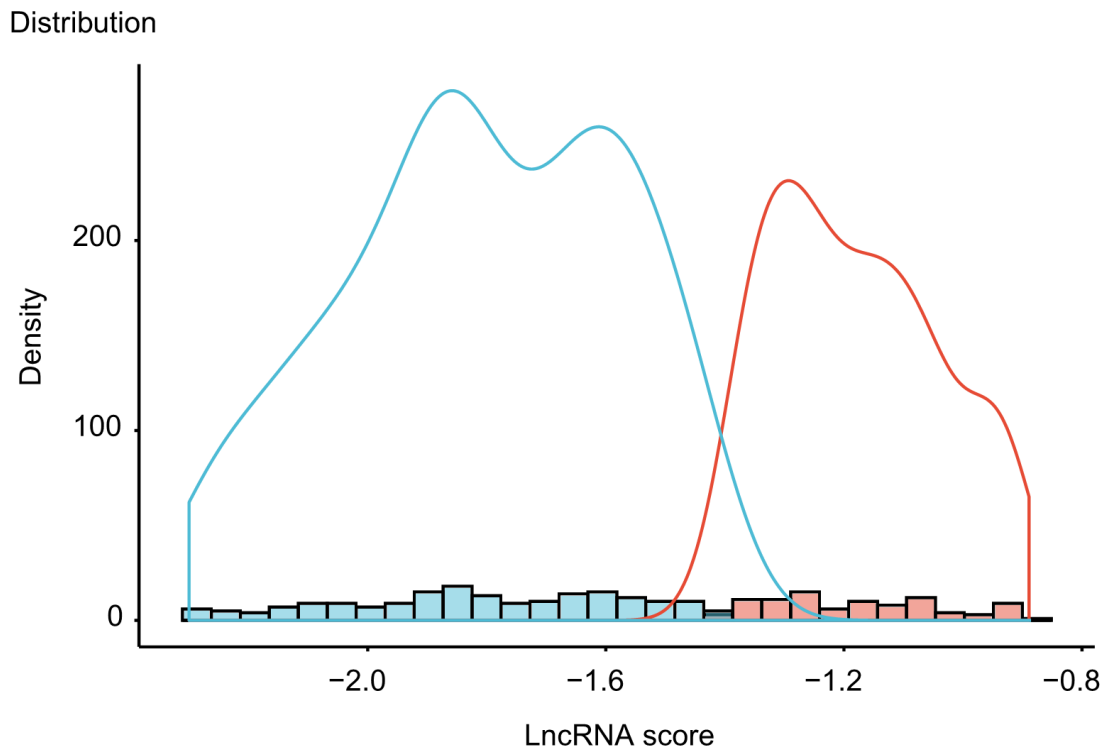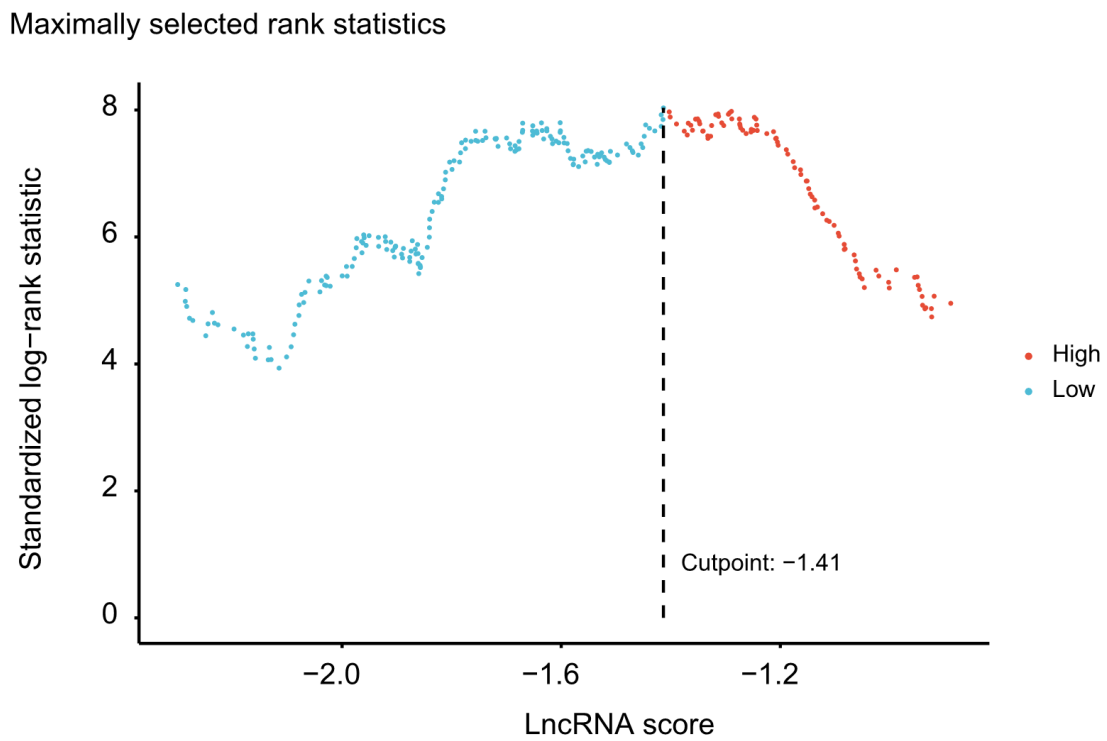

**eFigure 24.** Overall Survival Stratified by LncRNA Score in IMvigor210 Trial.

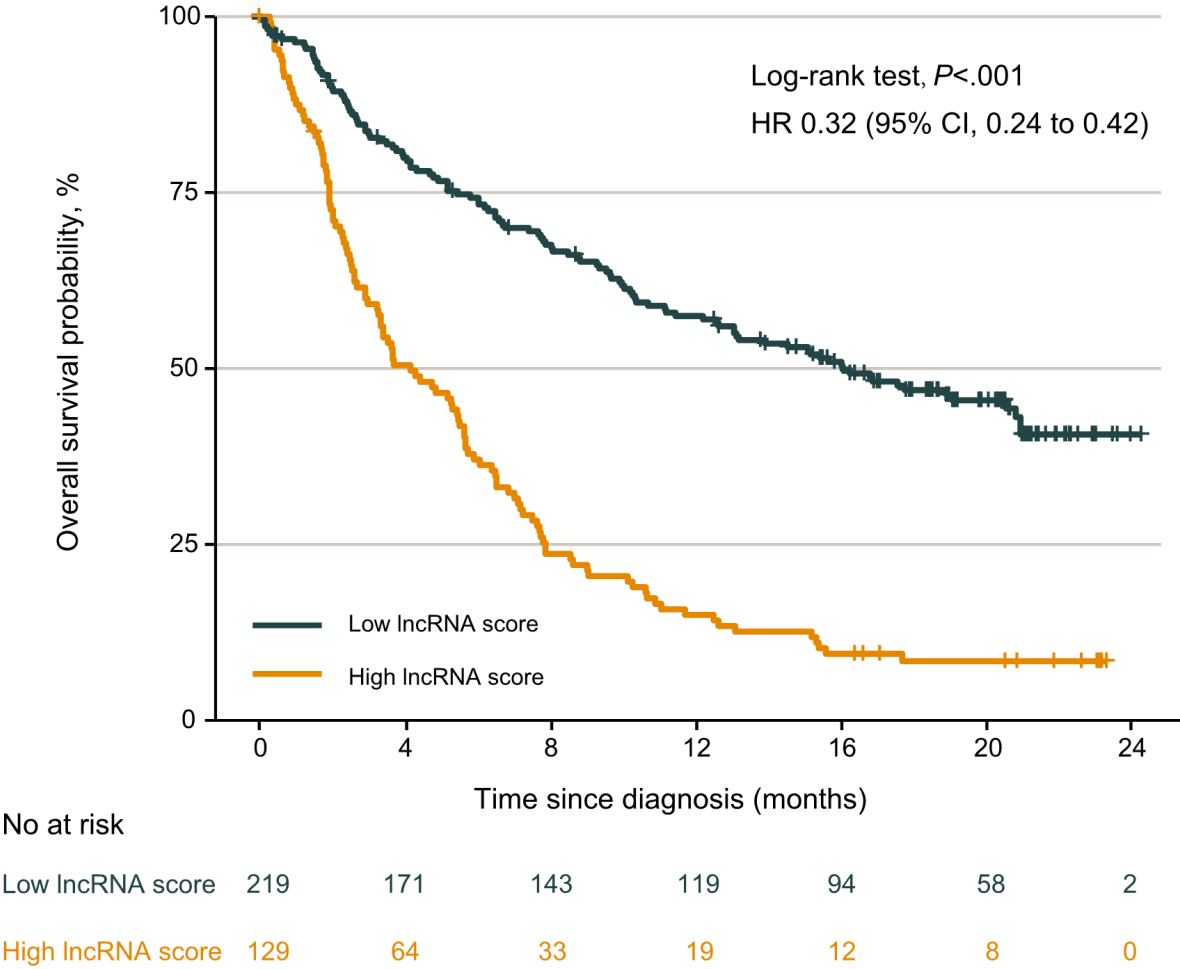

LncRNA, long non-coding RNA; HR, hazard ratio; CI, confidence interval.

**eFigure 25.** Objective Response Rate Stratified by LncRNA Score in IMvigor210 Trial.

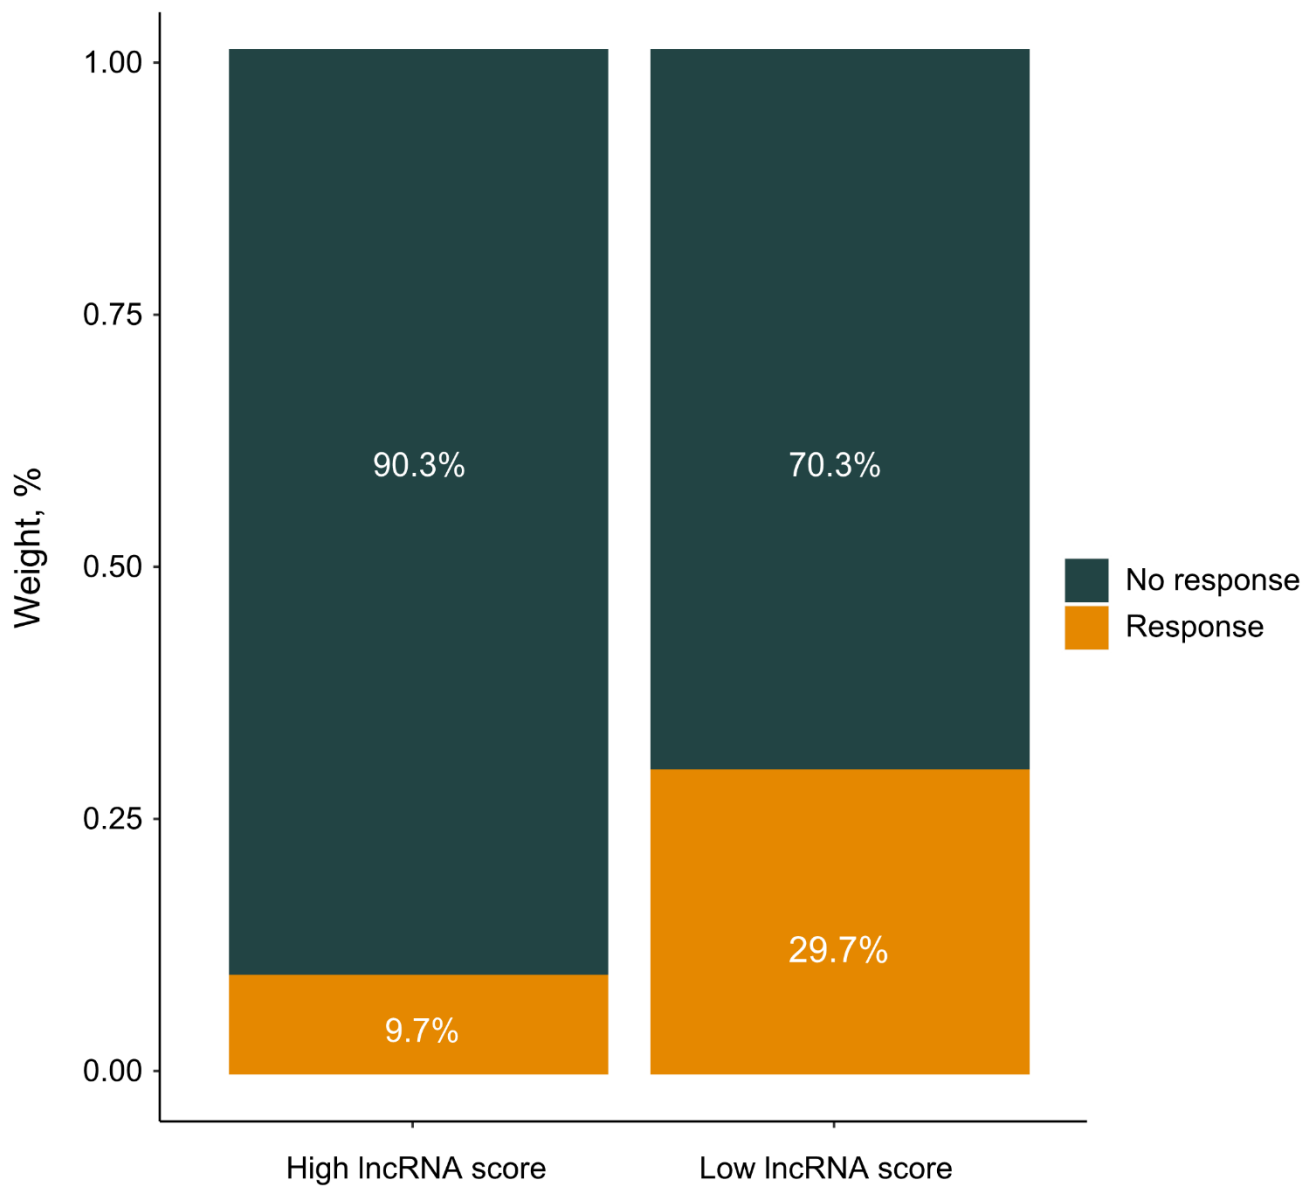

LncRNA, long non-coding RNA.

**eFigure 26.** Disease Control Rate Stratified by LncRNA Score in IMvigor210 Trial.

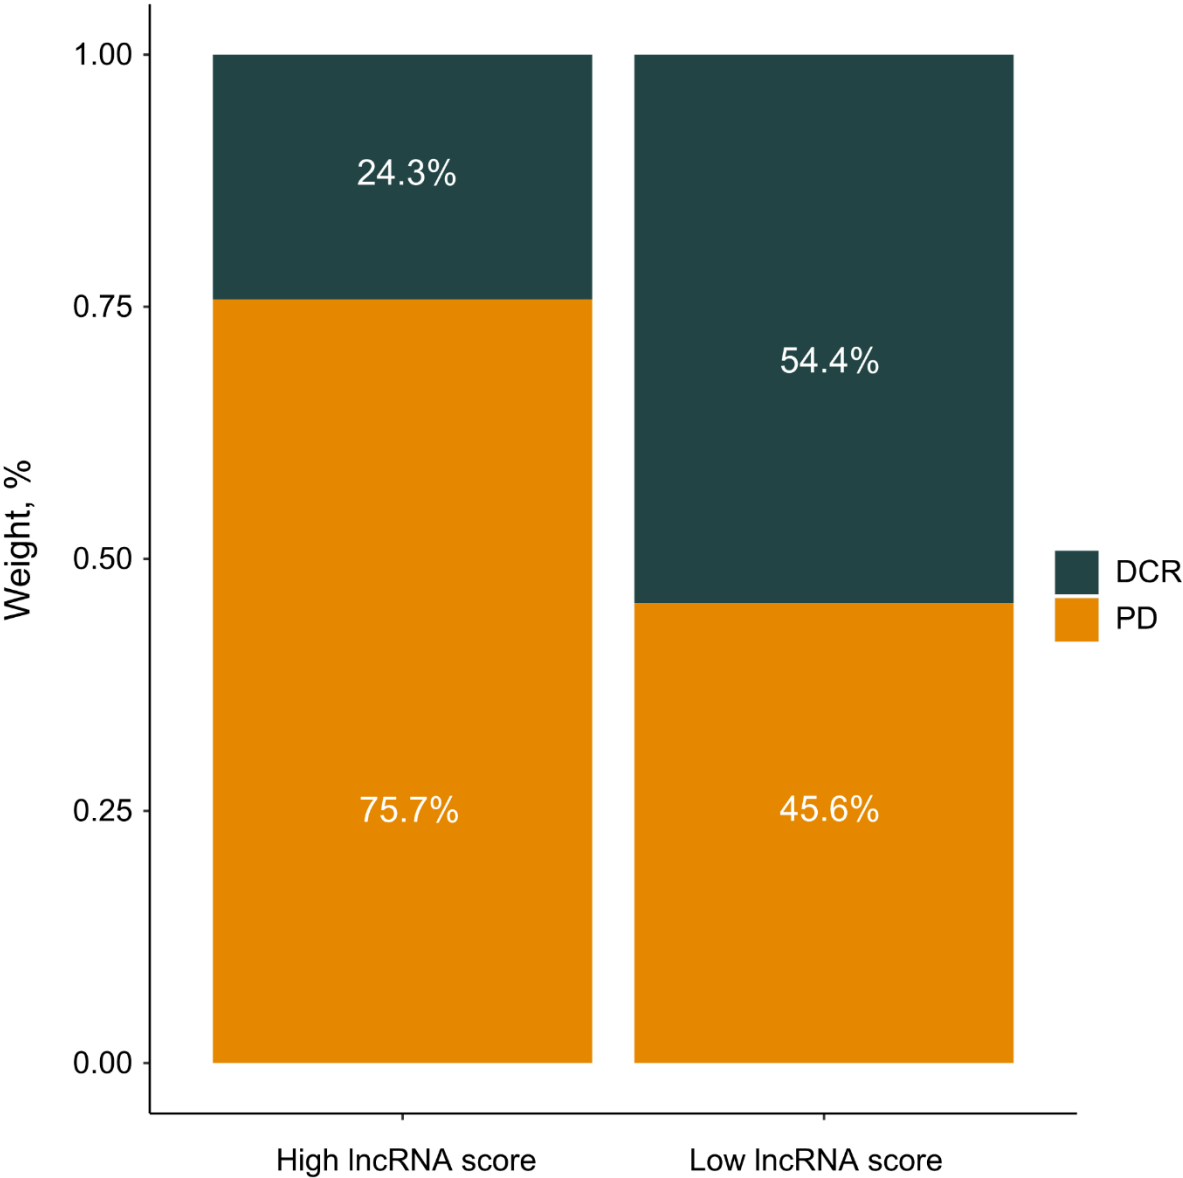

LncRNA, long non-coding RNA; DCR, disease control rate; PD, progressive disease.

**eFigure 27.** Objective Response Rate stratified by LncRNA Score in Melanoma Immunotherapy Cohort.

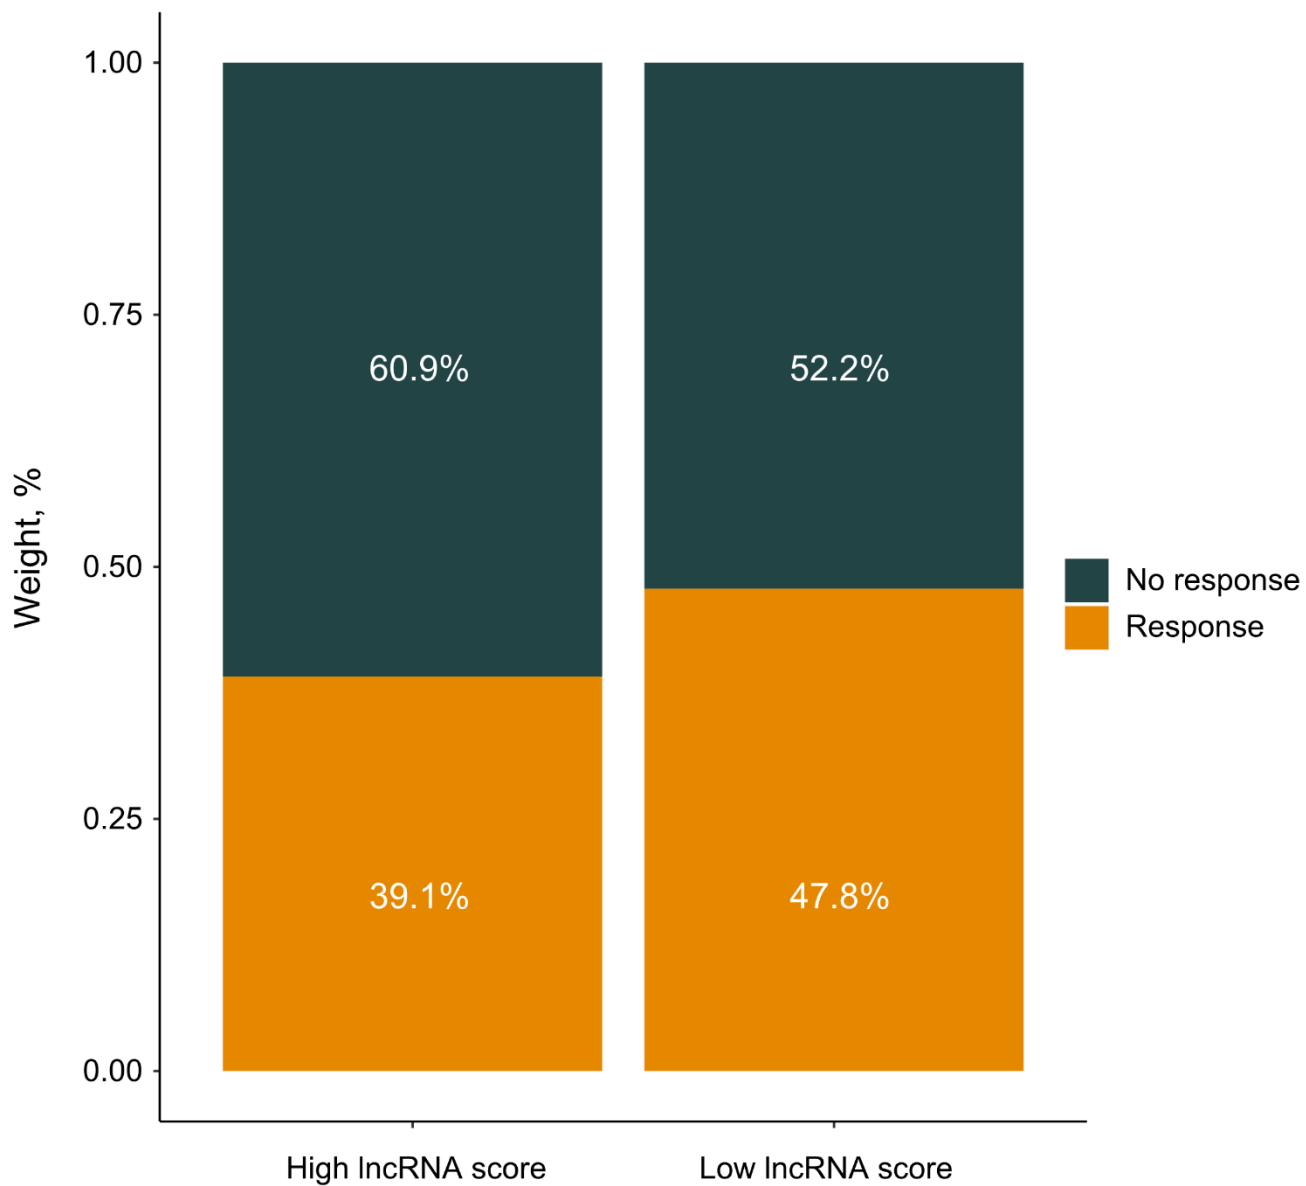

LncRNA, long non-coding RNA.

**eFigure 28.** Association of LncRNA Score with Overall Survival in TCGA Cohorts.

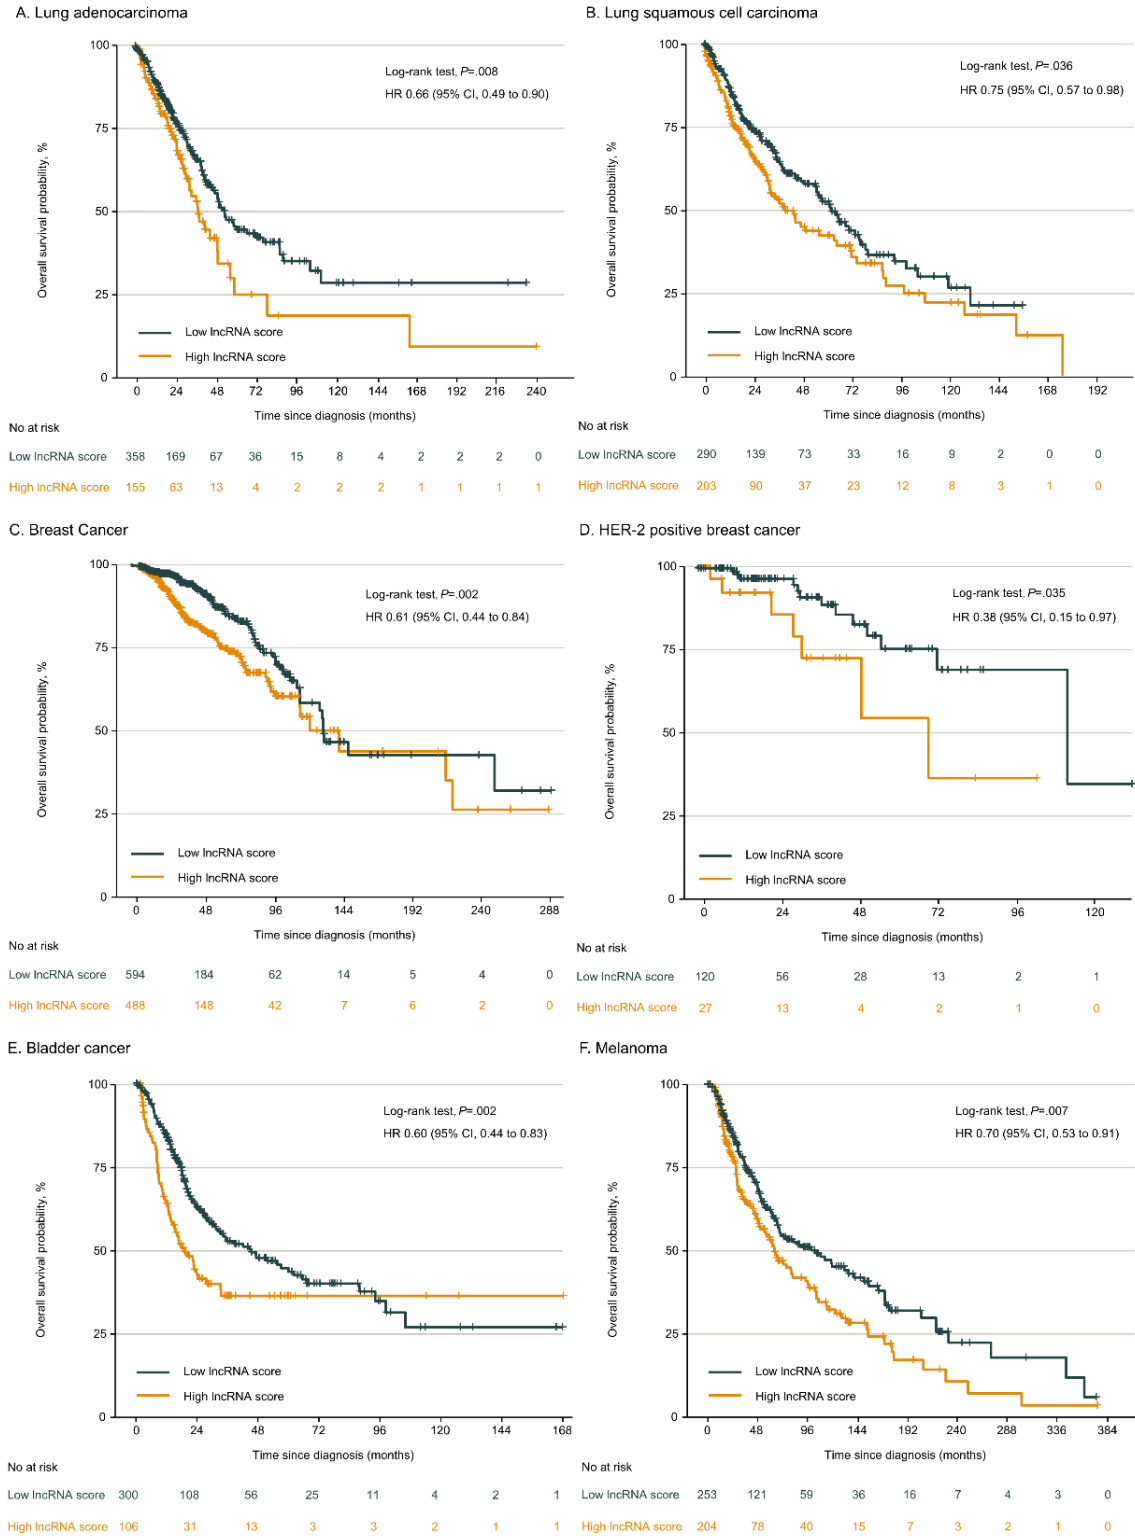

A, Lung adenocarcinoma. B, Lung squamous cell carcinoma. C, Breast Cancer. D, HER-2 positive breast cancer. E, Bladder cancer. F,

---

Melanoma. LncRNA, long non-coding RNA; HR, hazard ratio; CI, confidence interval.



**eFigure 29.** Association of LncRNA Score and Multiomics Biomarker with Overall Survival in IMvigor210 trial.

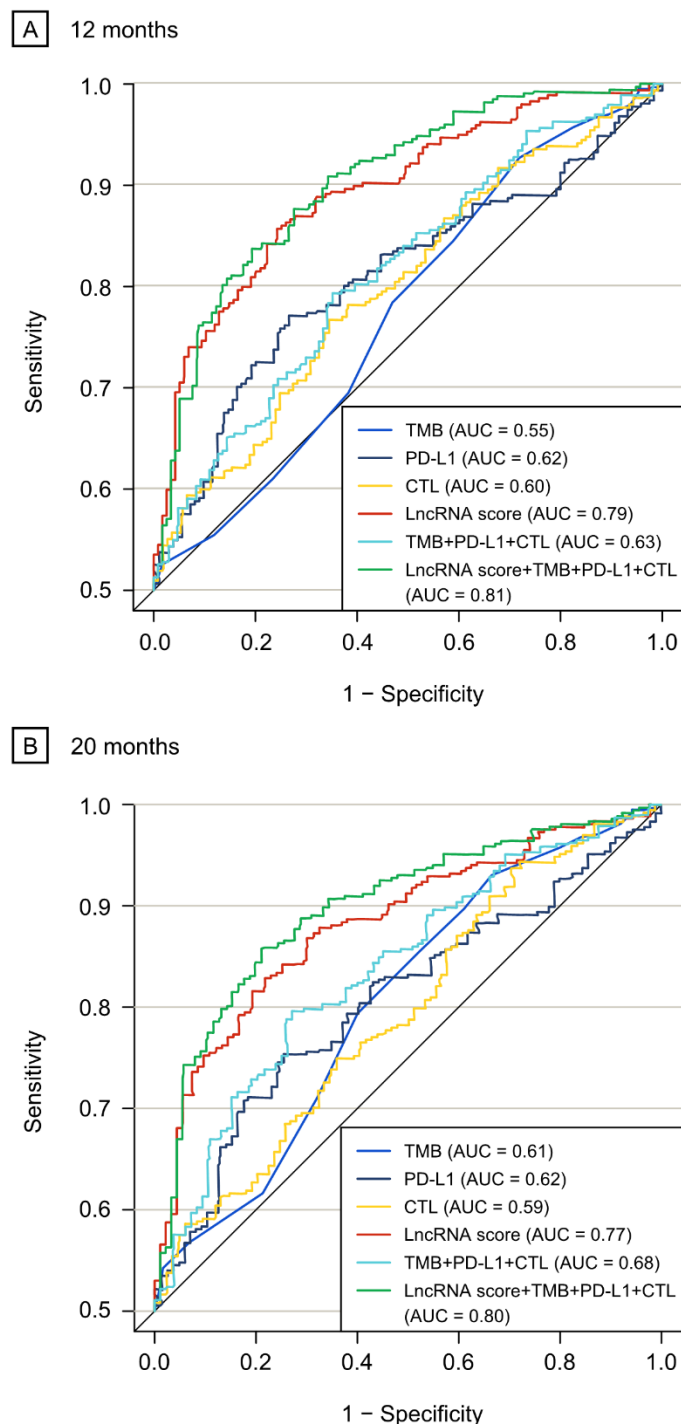

A, 12-month. B, 20-month. The lncRNA score was associated with immunotherapeutic OS benefits in IMvigor 210 trial (AUC, 12-month=0.79; 20-month=0.77) and in melanoma cohort (24-month AUC=0.87) in superior to CTL, PD-L1 expression, and TMB. We established a model combining TMB, PD-L1 expression, CTL, but did not observe a significant improvement of AUC value (12-month=0.63; 20-month=0.68) compared with single variable. We further added lncRNA to this model to build a novel multiomics algorithm and found it correlated more

---

strongly with OS in IMvigor 210 trial (AUC, 12-month=0.81; 20-month=0.80). LncRNA, Long Non-Coding RNA; PD-L1, programmed death-ligand 1; TMB, tumor mutation burden; AUC, area under the receiver operating characteristic curve; CTL, cytotoxic T lymphocytes.

**eFigure 30.** Association of LncRNA Score with Response in IMvigor210 trial.

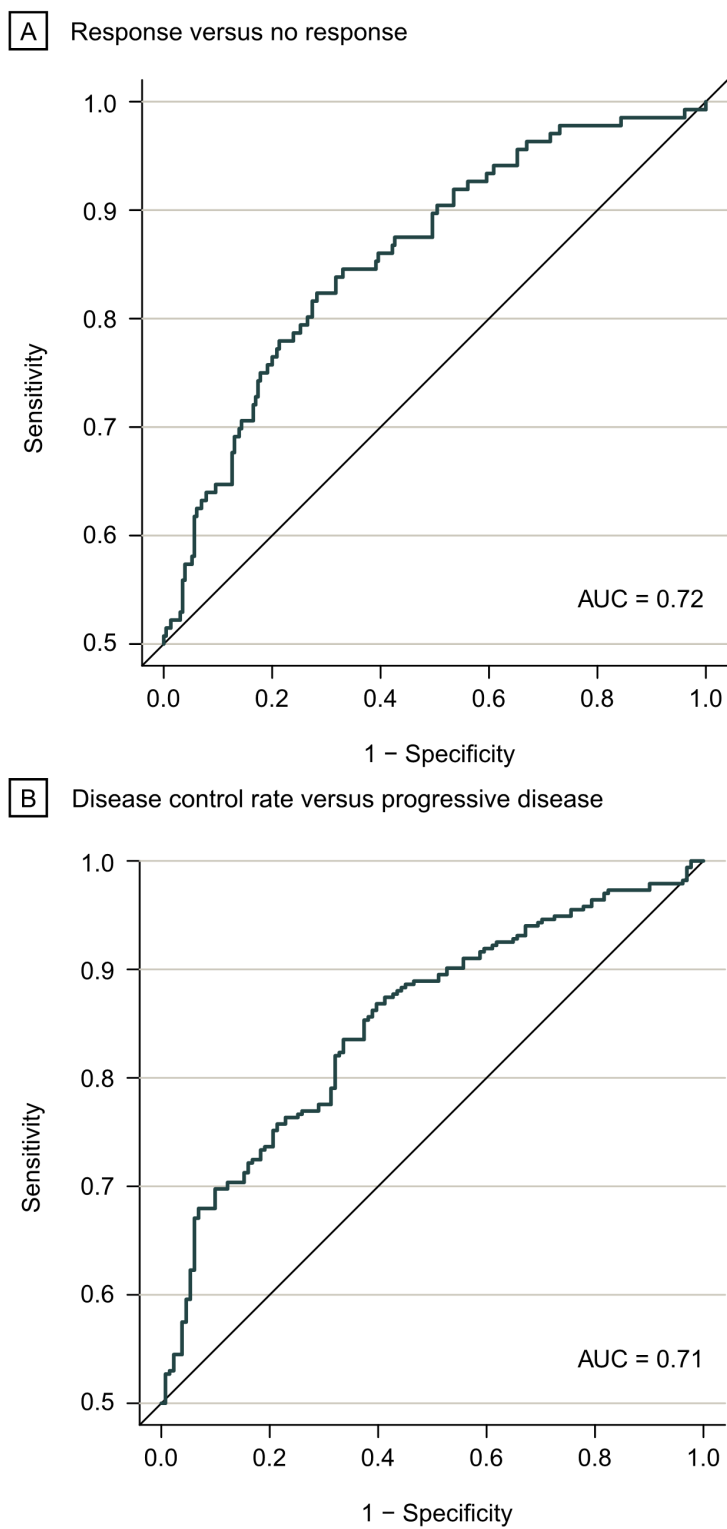

A, The ability of LncRNA score to classify patients with response versus no response. B, The ability of LncRNA score to classify patients with disease control versus progressive disease. AUC, area under the receiver operating characteristic curve.

**eTable 1. Characteristics and Clinical Outcomes of the Patients in IMvigor210 Trial.**

| <b>Characteristics/Clinical Outcomes</b>  | <b>IMvigor210 Trial</b> |
|-------------------------------------------|-------------------------|
| No. of patients                           | 348                     |
| Sex (%)                                   |                         |
| Male                                      | 272 (78.2)              |
| Female                                    | 76 (21.8)               |
| Race (%)                                  |                         |
| White                                     | 318 (91.4)              |
| Black or African American                 | 9 (2.6)                 |
| Native Hawaiian or other pacific islander | 1 (0.3)                 |
| Asian                                     | 8 (2.3)                 |
| Other                                     | 8 (2.3)                 |
| Unknown                                   | 4 (1.1)                 |
| Baseline ECOG-PS (%)                      |                         |
| 0                                         | 134 (38.5)              |
| 1                                         | 196 (56.3)              |
| 2                                         | 18 (5.2)                |
| Tissue (%)                                |                         |
| Bladder                                   | 195 (57.4)              |
| Kidney                                    | 67 (19.7)               |
| Liver                                     | 5 (1.5)                 |
| Lung                                      | 10 (2.9)                |
| Lymph node                                | 26 (7.6)                |
| Other                                     | 11 (3.2)                |
| Ureter                                    | 26 (7.6)                |
| Received platinum-based chemotherapy (%)  |                         |
| Yes                                       | 272 (78.2)              |
| No                                        | 76 (21.8)               |
| Mutation burden per Mb, mean (SD)         | 10.9 (9.6)              |
| Follow up, median (IQR), months           | 8.1 (2.9-17.8)          |
| TCGA Subtype (%)                          |                         |
| Basal/SCC-like                            | 66 (19.0)               |
| Genomically unstable                      | 70 (20.1)               |
| Infiltrated                               | 92 (26.4)               |
| UroA                                      | 102 (29.3)              |
| UroB                                      | 18 (5.2)                |
| Best confirmed overall response (%)       |                         |

---

|                     |            |
|---------------------|------------|
| Complete response   | 25 (7.2)   |
| Partial response    | 43 (12.4)  |
| Stable disease      | 63 (18.1)  |
| Progressive disease | 167 (48.0) |
| Unknown             | 50 (14.4)  |

ECOG-PS, Eastern Cooperative Oncology Group Performance Status; Mb, megabase; SD, standard deviation; IQR, interquartile range; TCGA, The Cancer Genome Atlas; SCC, squamous cell carcinoma.

**eTable 2.** Baseline Characteristics of the Patients in TCGA Bladder Cancer Cohort.

| Characteristic                                 | TCGA Bladder Cancer Cohort |
|------------------------------------------------|----------------------------|
| No. of patients                                | 406                        |
| Sex (%)                                        |                            |
| Male                                           | 300 (73.9)                 |
| Female                                         | 106 (26.1)                 |
| Race (%)                                       |                            |
| White                                          | 324 (79.8)                 |
| Black or African American                      | 22 (5.4)                   |
| Asian                                          | 43 (10.6)                  |
| Unknown                                        | 17 (4.2)                   |
| Follow up, median (IQR), months                | 17.9 (11.0-31.6)           |
| Tumor stage (%)                                |                            |
| Stage I                                        | 3 (0.7)                    |
| Stage II                                       | 128 (31.5)                 |
| Stage III                                      | 141 (34.7)                 |
| Stage IV                                       | 132 (32.5)                 |
| Unknown                                        | 2 (0.5)                    |
| History of neoadjuvant treatment (%)           |                            |
| No                                             | 396 (97.5)                 |
| Yes                                            | 10 (2.5)                   |
| Lymph-vascular invasion present (%)            |                            |
| Yes                                            | 149 (36.7)                 |
| No                                             | 128 (31.5)                 |
| Unknown                                        | 129 (31.8)                 |
| Neoplasm histologic grade (%)                  |                            |
| High grade                                     | 383 (94.3)                 |
| Low grade                                      | 20 (4.9)                   |
| Unknown                                        | 3 (0.7)                    |
| Primary lymph node presentation assessment (%) |                            |
| Yes                                            | 288 (70.9)                 |
| No                                             | 78 (19.2)                  |
| Unknown                                        | 40 (9.9)                   |
| History of radiation therapy (%)               |                            |
| Yes                                            | 18 (4.4)                   |
| No                                             | 277 (68.2)                 |
| Unknown                                        | 111 (27.3)                 |
| Primary diagnosis (%)                          |                            |
| Papillary transitional cell carcinoma          | 64 (15.8)                  |

---

|                             |            |
|-----------------------------|------------|
| Transitional cell carcinoma | 339 (83.5) |
| Other                       | 3 (0.6)    |

IQR, interquartile range; TCGA, The Cancer Genome Atlas.

**eTable 3.** Kyoto Encyclopedia of Genes and Genomes Pathway Enrichment Analysis of NKILA in IMvigor210 Trial

| ID       | Description                      | Gene ratio | Bg Ratio | P value  | P adjust | Q value  | Gene ID                                                                                                                                                                             | Count |
|----------|----------------------------------|------------|----------|----------|----------|----------|-------------------------------------------------------------------------------------------------------------------------------------------------------------------------------------|-------|
| hsa04512 | ECM-receptor interaction         | 23/206     | 86/7868  | 1.34E-17 | 3.36E-15 | 3.01E-15 | 3693/3918/2335/3371/1284/3690/3685/3678/1291/1293/1292/3909/1282/3910/1277/1278/22801/7057/7058/3673/3696/3339/284217                                                               | 23    |
| hsa04510 | Focal adhesion                   | 32/206     | 199/7868 | 5.08E-17 | 6.36E-15 | 5.70E-15 | 56034/87/2316/3693/3918/2335/5154/3371/1284/3690/3685/7791/3678/1291/1293/1292/7424/3909/1282/3910/1277/5155/1278/5159/22801/7057/7058/3673/3696/824/284217/29780                   | 32    |
| hsa04151 | PI3K-Akt signaling pathway       | 35/206     | 354/7868 | 5.69E-12 | 4.74E-10 | 4.25E-10 | 56034/2246/3693/3918/2335/5154/3371/1284/9180/3690/3685/3678/1291/1293/9586/1292/7424/3909/1021/1282/3910/1277/5155/1278/5159/22801/7057/7058/2149/1435/7097/3673/3696/90993/284217 | 35    |
| hsa05165 | Human papillomavirus infection   | 30/206     | 330/7868 | 1.72E-09 | 1.08E-07 | 9.66E-08 | 3693/3918/2335/3371/1284/3690/3685/3678/1291/1293/2535/9586/1292/3909/1021/1282/3910/1277/355/1278/5159/22801/7057/81029/7058/3673/3696/90993/83439/284217                          | 30    |
| hsa04974 | Protein digestion and absorption | 15/206     | 90/7868  | 9.08E-09 | 4.54E-07 | 4.07E-07 | 1289/1284/1290/1294/80781/1291/1293/1292/1282/1277/1301/1300/1281/1278/50509                                                                                                        | 15    |
| hsa05146 | Amoebiasis                       | 14/206     | 95/7868  | 1.44E-07 | 6.01E-06 | 5.39E-06 | 87/3918/2335/1284/7042/3909/1282/3910/1277/1281/1278/3684/7097/284217                                                                                                               | 14    |
| hsa04810 | Regulation of actin cytoskeleton | 20/206     | 214/7868 | 7.02E-07 | 2.51E-05 | 2.25E-05 | 56034/87/2246/3693/2335/5154/3690/3685/3678/4478/6237/5155/54434/5159/3684/22801/2149/3673/3696/3984                                                                                | 20    |



|          |                                                                         |           |          |             |             |             |                                                                                               |       |
|----------|-------------------------------------------------------------------------|-----------|----------|-------------|-------------|-------------|-----------------------------------------------------------------------------------------------|-------|
| hsa05414 | Dilated cardiomyopathy (DCM)                                            | 13/206    | 96/7868  | 1.11E-06    | 3.47E-05    | 3.11E-05    | 3693/6443/7042/3690/113/3685/3678/7169/22801/3673/3696/7168/284217                            | 13    |
| hsa05205 | Proteoglycans in cancer                                                 | 19/206    | 203/7868 | 1.32E-06    | 3.67E-05    | 3.29E-05    | 2316/3693/2335/7042/3690/5328/3685/3678/815/4478/2535/6237/355/7057/81029/7097/3673/5329/3339 | 19    |
| hsa05410 | Hypertrophic cardiomyopathy (HCM)                                       | 12/206    | 90/7868  | 3.43E-06    | 8.58E-05    | 7.69E-05    | 3693/6443/7042/3690/3685/3678/7169/22801/3673/3696/7168/284217                                | 12    |
| hsa05412 | Arrhythmogenic right ventricular cardiomyopathy (ARVC)                  | 11/206    | 77/7868  | 4.46E-06    | 0.000101429 | 9.10E-05    | 3693/6443/3690/3685/3678/1000/22801/3673/3696/83439/284217                                    | 11    |
| ID       | Description                                                             | GeneRatio | BgRatio  | pvalue      | p.adjust    | qvalue      | geneID                                                                                        | Count |
| hsa00532 | Glycosaminoglycan biosynthesis - chondroitin sulfate / dermatan sulfate | 6/206     | 20/7868  | 8.54E-06    | 0.000177974 | 0.000159615 | 50515/51363/29940/55454/337876/9469                                                           | 6     |
| hsa05222 | Small cell lung cancer                                                  | 10/206    | 93/7868  | 0.000147954 | 0.002845277 | 0.002551764 | 3918/2335/1284/3685/3909/1021/1282/3910/3673/284217                                           | 10    |
| hsa04145 | Phagosome                                                               | 13/206    | 152/7868 | 0.00016585  | 0.002961614 | 0.0026561   | 3693/9902/3690/84617/3685/3678/2212/3684/7057/7058/7097/3673/4688                             | 13    |
| hsa04933 | AGE-RAGE signaling pathway in diabetic complications                    | 10/206    | 100/7868 | 0.000270397 | 0.004506621 | 0.004041728 | 2335/1284/7042/50507/7424/1282/1277/2152/1281/1278                                            | 10    |
| hsa05215 | Prostate cancer                                                         | 9/206     | 97/7868  | 0.000945551 | 0.014774227 | 0.013250149 | 56034/5154/2119/5328/9586/5155/5159/90993/83439                                               | 9     |

|          |                           |        |          |             |             |             |                                                                       |    |
|----------|---------------------------|--------|----------|-------------|-------------|-------------|-----------------------------------------------------------------------|----|
| hsa04015 | Rap1 signaling pathway    | 14/206 | 210/7868 | 0.00119227  | 0.017533389 | 0.015724681 | 56034/2246/5154/3690/9732/113/7424/6237/5155/5159/3684/7057/2149/1435 | 14 |
| hsa04611 | Platelet activation       | 10/206 | 124/7868 | 0.001479855 | 0.020553544 | 0.018433284 | 3690/113/1277/2212/1281/5592/1278/5739/2149/3673                      | 10 |
| hsa04926 | Relaxin signaling pathway | 10/206 | 130/7868 | 0.002109689 | 0.02775907  | 0.024895503 | 1284/113/9586/7424/1282/59350/1277/1281/1278/90993                    | 10 |

**eTable 4. Gene Ontology Pathway Enrichment Analysis of NKILA in IMvigor210 Trial**

| Ontology | ID         | Description                          | Gene ratio | Bg ratio  | P value  | P adjust | Q value  | Gene ID                                                                                                                                                                                                                                                                                                                                               | Count |
|----------|------------|--------------------------------------|------------|-----------|----------|----------|----------|-------------------------------------------------------------------------------------------------------------------------------------------------------------------------------------------------------------------------------------------------------------------------------------------------------------------------------------------------------|-------|
| BP       | GO:0030198 | extracellular matrix organization    | 66/434     | 334/17913 | 3.88E-41 | 1.47E-37 | 1.26E-37 | 8728/649/323/4241/55959/23187/3693/4017/3918/2191/2335/5154/7837/1289/3371/9509/84695/1284/7042/1307/3690/23213/1290/1294/80781/140766/4323/3685/3678/1291/30008/84168/1293/1295/1292/7076/3909/1462/165/1282/3910/1277/633/10609/1301/1300/1281/1296/11117/5155/6662/1278/3684/22801/7057/6678/3673/8038/22795/3696/90993/824/4237/3339/50509/284217 | 66    |
| BP       | GO:0043062 | extracellular structure organization | 66/434     | 387/17913 | 5.85E-37 | 1.11E-33 | 9.47E-34 | 8728/649/323/4241/55959/23187/3693/4017/3918/2191/2335/5154/7837/1289/3371/9509/84695/1284/7042/1307/3690/23213/1290/1294/80781/140766/4323/3685/3678/1291/30008/84168/1293/1295/1292/7076/3909/1462/165/1282/3910/1277/633/10609/1301/1300/1281/1296/11117/5155/6662/1278/3684/22801/7057/6678/3673/8038/22795/3696/90993/824/4237/3339/50509/284217 | 66    |
| BP       | GO:0031589 | cell-substrate adhesion              | 40/434     | 322/17913 | 1.63E-17 | 2.06E-14 | 1.77E-14 | 558/3956/81792/87/342184/2316/4241/3693/2335/91663/1307/3690/51330/5328/4323/9448/3685/7791/3678/8829/84168/1295/1021/1277/23499/10631/1281/6695/11117/3897/1012/22801/7057/23603/1435/3673/22795/340485/50509/10085                                                                                                                                  | 40    |
| BP       | GO:0035987 | endodermal cell differentiation      | 15/434     | 45/17913  | 8.12E-14 | 7.70E-11 | 6.58E-11 | 8091/3624/3693/2335/1289/1284/1290/1294/4323/3685/3678/1291/1295/3909/1301                                                                                                                                                                                                                                                                            | 15    |
| BP       | GO:0007160 | cell-matrix adhesion                 | 28/434     | 214/17913 | 3.59E-13 | 2.72E-10 | 2.32E-10 | 81792/87/342184/3693/2335/1307/3690/5328/4323/9448/3685/7791/8829/1021/23499/10631/1281/11117/3897/1012/22801/7057/23603/1435/3673/22795/340485/50509                                                                                                                                                                                                 | 28    |
| BP       | GO:00      | endoderm                             | 15/434     | 50/17913  | 4.75E-   | 3.00E-10 | 2.56     | 8091/3624/3693/2335/1289/1284/1290/1294/                                                                                                                                                                                                                                                                                                              | 15    |

|    |            |                                       |        |           |          |          |          |                                                                                                                                                                                                     |    |
|----|------------|---------------------------------------|--------|-----------|----------|----------|----------|-----------------------------------------------------------------------------------------------------------------------------------------------------------------------------------------------------|----|
|    | 01706      | formation                             |        |           | 13       |          | E-10     | 4323/3685/3678/1291/1295/3909/1301                                                                                                                                                                  |    |
| BP | GO:0007492 | endoderm development                  | 17/434 | 73/17913  | 1.27E-12 | 6.80E-10 | 5.82E-10 | 8091/3624/3693/2335/1289/1284/1290/1294/4323/3685/3678/1291/1295/3909/1301/53918/2131                                                                                                               | 17 |
| BP | GO:0061448 | connective tissue development         | 29/434 | 243/17913 | 1.44E-12 | 6.80E-10 | 5.82E-10 | 8091/7045/81792/649/8609/55959/2121/50515/4017/4094/1289/23213/353500/91252/7076/1277/1301/7227/5155/6662/5159/81029/2822/860/1435/2736/3696/658/1893                                               | 29 |
| BP | GO:0030199 | collagen fibril organization          | 14/434 | 45/17913  | 1.64E-12 | 6.91E-10 | 5.91E-10 | 4017/1289/9509/7042/1290/140766/165/1277/10609/1301/1281/11117/1278/50509                                                                                                                           | 14 |
| BP | GO:0032963 | collagen metabolic process            | 18/434 | 102/17913 | 4.08E-11 | 1.55E-08 | 1.32E-08 | 9902/2191/64175/1289/9509/7431/57333/140766/4323/1277/10609/11117/1278/5159/1508/2149/3673/90993                                                                                                    | 18 |
| BP | GO:0051216 | cartilage development                 | 23/434 | 182/17913 | 9.73E-11 | 3.35E-08 | 2.87E-08 | 8091/7045/81792/649/55959/2121/50515/4017/4094/23213/353500/7076/1277/1301/7227/6662/81029/2822/860/2736/3696/658/1893                                                                              | 23 |
| BP | GO:0010810 | regulation of cell-substrate adhesion | 24/434 | 201/17913 | 1.26E-10 | 3.97E-08 | 3.40E-08 | 3956/342184/2316/4241/2335/91663/1307/5328/4323/9448/3678/8829/1295/1021/1277/23499/10631/6695/1012/7057/23603/1435/340485/10085                                                                    | 24 |
| BP | GO:0002062 | chondrocyte differentiation           | 17/434 | 97/17913  | 1.60E-10 | 4.66E-08 | 3.99E-08 | 8091/7045/81792/55959/50515/4017/4094/23213/1301/7227/6662/81029/2822/860/2736/658/1893                                                                                                             | 17 |
| BP | GO:0001501 | skeletal system development           | 37/434 | 479/17913 | 5.42E-10 | 1.47E-07 | 1.25E-07 | 8091/7045/81792/56034/649/342184/56172/55959/2121/50515/4017/4094/64175/56975/7042/23213/4323/353500/7076/1277/1301/1300/1281/7227/6662/1278/81029/6678/2822/860/2131/53834/2736/3696/9060/658/1893 | 37 |
| BP | GO:0001704 | formation of primary germ layer       | 17/434 | 117/17913 | 3.25E-09 | 8.20E-07 | 7.01E-07 | 8091/3624/3693/2335/1289/1284/3690/1290/1294/4323/3685/3678/1291/1295/3909/1301/3673                                                                                                                | 17 |
| BP | GO:0006029 | proteoglycan metabolic process        | 14/434 | 79/17913  | 5.78E-09 | 1.37E-06 | 1.17E-06 | 81792/55959/50515/51363/29940/23213/55454/1462/633/337876/1301/2131/9469/658                                                                                                                        | 14 |
| BP | GO:00      | glycosamino                           | 16/434 | 107/1791  | 6.17E-   | 1.37E-06 | 1.17     | 50515/51363/10402/29940/8534/55454/1462/                                                                                                                                                            | 16 |

|    |            |                                          |        |           |          |          |          |                                                                                                                                                                   |    |
|----|------------|------------------------------------------|--------|-----------|----------|----------|----------|-------------------------------------------------------------------------------------------------------------------------------------------------------------------|----|
|    | 06024      | glycan biosynthetic process              |        | 3         | 09       |          | E-06     | 633/337876/2239/5155/10082/5159/2131/9469/3339                                                                                                                    |    |
| BP | GO:0001503 | ossification                             | 31/434 | 388/17913 | 6.50E-09 | 1.37E-06 | 1.17E-06 | 9260/649/56172/9902/3371/56975/25937/7042/115908/1290/4330/4323/23601/353500/1291/1462/1021/1277/1301/6662/1278/22801/6678/2822/860/1435/2131/2736/90993/658/1893 | 31 |
| BP | GO:0006023 | aminoglycan biosynthetic process         | 16/434 | 108/17913 | 7.09E-09 | 1.41E-06 | 1.21E-06 | 50515/51363/10402/29940/8534/55454/1462/633/337876/2239/5155/10082/5159/2131/9469/3339                                                                            | 16 |
| BP | GO:0007369 | gastrulation                             | 20/434 | 178/17913 | 1.29E-08 | 2.44E-06 | 2.09E-06 | 8091/3624/23187/3693/2335/1289/91663/1284/3690/1290/1294/4323/3685/3678/1291/1295/3909/1301/3673/2131                                                             | 20 |
| BP | GO:0007229 | integrin-mediated signaling pathway      | 14/434 | 94/17913  | 5.81E-08 | 1.05E-05 | 8.97E-06 | 2316/3693/84695/1307/3690/3685/7791/3678/8829/7076/1281/3684/22801/3673                                                                                           | 14 |
| BP | GO:0034330 | cell junction organization               | 24/434 | 277/17913 | 7.63E-08 | 1.26E-05 | 1.08E-05 | 87/342184/2316/1002/3918/2335/7042/1307/143098/79983/4323/9448/3678/8829/1000/3909/23499/1012/7057/11228/23603/2149/3673/861                                      | 24 |
| BP | GO:0007044 | cell-substrate junction assembly         | 14/434 | 96/17913  | 7.64E-08 | 1.26E-05 | 1.08E-05 | 87/342184/3918/2335/1307/4323/9448/3678/8829/3909/23499/7057/23603/3673                                                                                           | 14 |
| BP | GO:0002576 | platelet degranulation                   | 16/434 | 128/17913 | 8.35E-08 | 1.32E-05 | 1.13E-05 | 87/2316/135228/2335/5154/7042/3690/308/7076/7424/5155/7057/6678/5265/12/1893                                                                                      | 16 |
| BP | GO:0030206 | chondroitin sulfate biosynthetic process | 8/434  | 26/17913  | 1.19E-07 | 1.80E-05 | 1.54E-05 | 50515/51363/29940/55454/1462/633/337876/9469                                                                                                                      | 8  |
| BP | GO:0002063 | chondrocyte development                  | 8/434  | 27/17913  | 1.65E-07 | 2.40E-05 | 2.06E-05 | 55959/50515/23213/1301/6662/860/658/1893                                                                                                                          | 8  |
| BP | GO:00      | glycosamino                              | 17/434 | 157/1791  | 2.74E-   | 3.84E-05 | 3.29     | 50515/51363/10402/29940/8534/55454/1462/                                                                                                                          | 17 |

|    |            |                                                       |        |           |          |             |             |                                                                                              |    |
|----|------------|-------------------------------------------------------|--------|-----------|----------|-------------|-------------|----------------------------------------------------------------------------------------------|----|
|    | 30203      | glycan metabolic process                              |        | 3         | 07       |             | E-05        | 633/337876/2239/5155/10082/5159/2131/9469/3339/11261                                         |    |
| BP | GO:0014909 | smooth muscle cell migration                          | 13/434 | 91/17913  | 2.86E-07 | 3.87E-05    | 3.31E-05    | 5154/3690/9732/5328/8829/50507/10631/5155/5592/54434/5159/3673/7168                          | 13 |
| BP | GO:0050650 | chondroitin sulfate proteoglycan biosynthetic process | 8/434  | 29/17913  | 3.06E-07 | 3.99E-05    | 3.42E-05    | 50515/51363/29940/55454/1462/633/337876/9469                                                 | 8  |
| BP | GO:0006022 | aminoglycan metabolic process                         | 17/434 | 161/17913 | 3.93E-07 | 4.97E-05    | 4.25E-05    | 50515/51363/10402/29940/8534/55454/1462/633/337876/2239/5155/10082/5159/2131/9469/3339/11261 | 17 |
| BP | GO:0045773 | positive regulation of axon extension                 | 9/434  | 41/17913  | 4.66E-07 | 5.54E-05    | 4.74E-05    | 1002/2335/8766/51330/8829/23499/3897/3984/51393                                              | 9  |
| BP | GO:0030166 | proteoglycan biosynthetic process                     | 10/434 | 53/17913  | 4.83E-07 | 5.54E-05    | 4.74E-05    | 50515/51363/29940/55454/1462/633/337876/2131/9469/658                                        | 10 |
| BP | GO:0032964 | collagen biosynthetic process                         | 10/434 | 53/17913  | 4.83E-07 | 5.54E-05    | 4.74E-05    | 1289/7431/57333/1277/10609/11117/5159/2149/3673/90993                                        | 10 |
| BP | GO:0001952 | regulation of cell-matrix adhesion                    | 14/434 | 117/17913 | 9.24E-07 | 0.000101235 | 8.66E-05    | 342184/1307/5328/4323/9448/8829/1021/23499/10631/1012/7057/23603/1435/340485                 | 14 |
| BP | GO:0014910 | regulation of smooth muscle cell migration            | 12/434 | 85/17913  | 9.35E-07 | 0.000101235 | 8.66E-05    | 5154/9732/5328/8829/50507/10631/5155/5592/54434/5159/3673/7168                               | 12 |
| BP | GO:0014812 | muscle cell migration                                 | 13/434 | 103/17913 | 1.23E-06 | 0.000129083 | 0.000110387 | 5154/3690/9732/5328/8829/50507/10631/5155/5592/54434/5159/3673/7168                          | 13 |

|    |            |                                                |        |           |          |             |             |                                                                                                         |    |
|----|------------|------------------------------------------------|--------|-----------|----------|-------------|-------------|---------------------------------------------------------------------------------------------------------|----|
| BP | GO:0010811 | positive regulation of cell-substrate adhesion | 13/434 | 110/17913 | 2.61E-06 | 0.000266863 | 0.000228211 | 342184/2316/2335/91663/1307/9448/3678/8829/1295/1021/1012/1435/10085                                    | 13 |
| BP | GO:0071230 | cellular response to amino acid stimulus       | 10/434 | 64/17913  | 2.96E-06 | 0.000294887 | 0.000252175 | 56034/1307/1290/1291/1282/1277/1281/2729/1278/824                                                       | 10 |
| BP | GO:0030204 | chondroitin sulfate metabolic process          | 8/434  | 39/17913  | 3.54E-06 | 0.000344277 | 0.000294411 | 50515/51363/29940/55454/1462/633/337876/9469                                                            | 8  |
| BP | GO:0010812 | negative regulation of cell-substrate adhesion | 10/434 | 67/17913  | 4.54E-06 | 0.000417838 | 0.000357318 | 3956/4241/4323/9448/1277/10631/6695/7057/23603/340485                                                   | 10 |
| BP | GO:0006929 | substrate-dependent cell migration             | 7/434  | 29/17913  | 4.59E-06 | 0.000417838 | 0.000357318 | 2335/8828/51330/8829/7424/22801/3673                                                                    | 7  |
| BP | GO:0034332 | adherens junction organization                 | 14/434 | 134/17913 | 4.73E-06 | 0.000417838 | 0.000357318 | 87/342184/1002/1307/4323/9448/8829/1000/23499/1012/7057/11228/23603/3673                                | 14 |
| BP | GO:0022612 | gland morphogenesis                            | 13/434 | 116/17913 | 4.74E-06 | 0.000417838 | 0.000357318 | 55959/5154/2119/3371/7042/23213/8829/4478/6662/1435/2736/7052/284217                                    | 13 |
| BP | GO:0034329 | cell junction assembly                         | 18/434 | 214/17913 | 4.97E-06 | 0.000427966 | 0.000365979 | 87/342184/2316/3918/2335/1307/143098/79983/4323/9448/3678/8829/3909/23499/7057/23603/3673/861           | 18 |
| BP | GO:0071559 | response to transforming growth factor beta    | 19/434 | 239/17913 | 6.20E-06 | 0.000522493 | 0.000446814 | 56937/4053/3693/7041/50515/135228/1284/7042/7791/50507/1277/10631/1281/11117/94031/6662/1278/7057/25878 | 19 |
| BP | GO:0050654 | chondroitin sulfate proteoglycan metabolic     | 8/434  | 42/17913  | 6.38E-06 | 0.000525445 | 0.000449339 | 50515/51363/29940/55454/1462/633/337876/9469                                                            | 8  |

|    |            |                                             |        |           |          |             |             |                                                                                                                                                     |    |
|----|------------|---------------------------------------------|--------|-----------|----------|-------------|-------------|-----------------------------------------------------------------------------------------------------------------------------------------------------|----|
|    |            | process                                     |        |           |          |             |             |                                                                                                                                                     |    |
| BP | GO:0022604 | regulation of cell morphogenesis            | 27/434 | 430/17913 | 6.83E-06 | 0.000550571 | 0.000470826 | 114299/2316/4241/1002/2335/91663/8766/51330/4651/8829/91010/4478/1627/23499/2048/10631/2035/57194/3897/55785/11135/6678/23603/7168/3984/51393/29780 | 27 |
| BP | GO:0034446 | substrate adhesion-dependent cell spreading | 11/434 | 86/17913  | 7.11E-06 | 0.00055499  | 0.000474604 | 558/2316/4241/2335/91663/3690/3685/8829/84168/10631/23603                                                                                           | 11 |
| BP | GO:0061138 | morphogenesis of a branching epithelium     | 16/434 | 178/17913 | 7.18E-06 | 0.00055499  | 0.000474604 | 2246/5154/2119/3371/23213/4323/8829/1282/1909/170690/6662/5311/1435/2736/7052/284217                                                                | 16 |
| BP | GO:0045785 | positive regulation of cell adhesion        | 25/434 | 388/17913 | 9.64E-06 | 0.000730885 | 0.000625023 | 8728/3956/342184/2316/2335/91663/7042/1307/9448/3685/3678/4651/8829/1295/1021/1012/1435/3673/861/2736/7292/7052/7168/10085/55083                    | 25 |
| BP | GO:0071774 | response to fibroblast growth factor        | 14/434 | 145/17913 | 1.18E-05 | 0.000879531 | 0.000752139 | 2246/55959/3371/56975/23213/161742/1277/10631/2729/7057/860/3730/53834/90993                                                                        | 14 |
| BP | GO:0032330 | regulation of chondrocyte differentiation   | 8/434  | 46/17913  | 1.30E-05 | 0.000944064 | 0.000807325 | 81792/4017/4094/7227/6662/860/2736/658                                                                                                              | 8  |
| BP | GO:0001667 | ameboidal-type cell migration               | 27/434 | 446/17913 | 1.32E-05 | 0.000944813 | 0.000807965 | 2246/4017/29775/2191/2335/8828/7042/3690/8766/9448/8829/161742/7076/7424/23499/5155/79899/6662/1012/7057/22846/6678/2822/23603/3673/85360/5793      | 27 |
| BP | GO:0001655 | urogenital system development               | 22/434 | 324/17913 | 1.47E-05 | 0.001034313 | 0.000884502 | 342184/2246/55959/84662/5154/3371/25937/7042/23213/8829/9244/1282/3976/2048/170690/5155/6662/5159/5311/2736/5017/55083                              | 22 |
| BP | GO:0033627 | cell adhesion mediated by                   | 9/434  | 61/17913  | 1.50E-05 | 0.001034313 | 0.000884502 | 7042/1307/3690/5328/3685/3678/22801/3673/340485                                                                                                     | 9  |



|    |            |                                                               |        |           |          |             |             |                                                                                                                                          |    |
|----|------------|---------------------------------------------------------------|--------|-----------|----------|-------------|-------------|------------------------------------------------------------------------------------------------------------------------------------------|----|
|    |            | integrin                                                      |        |           |          |             |             |                                                                                                                                          |    |
| BP | GO:0014911 | positive regulation of smooth muscle cell migration           | 8/434  | 47/17913  | 1.53E-05 | 0.001034313 | 0.000884502 | 9732/8829/50507/10631/5155/54434/5159/3673                                                                                               | 8  |
| BP | GO:1901342 | regulation of vasculature development                         | 26/434 | 425/17913 | 1.59E-05 | 0.0010481   | 0.000896292 | 8091/2246/29775/1284/7042/8877/23213/51330/3678/8829/161742/7424/6237/2152/11117/5155/7057/22846/6678/7058/861/8038/3696/90993/3339/1893 | 26 |
| BP | GO:0071560 | cellular response to transforming growth factor beta stimulus | 18/434 | 233/17913 | 1.60E-05 | 0.0010481   | 0.000896292 | 56937/4053/3693/7041/50515/135228/1284/7042/7791/50507/1277/10631/1281/11117/94031/6662/1278/7057                                        | 18 |
| BP | GO:1903510 | mucopolysaccharide metabolic process                          | 12/434 | 112/17913 | 1.74E-05 | 0.00111883  | 0.000956778 | 50515/51363/10402/29940/8534/55454/1462/633/337876/5155/9469/11261                                                                       | 12 |
| BP | GO:0060485 | mesenchyme development                                        | 19/434 | 258/17913 | 1.84E-05 | 0.001154703 | 0.000987455 | 8091/23187/7041/4017/359845/2335/8828/84695/25937/7042/8829/1277/1909/54796/6662/5159/5311/23603/23414                                   | 19 |
| BP | GO:0001763 | morphogenesis of a branching structure                        | 16/434 | 192/17913 | 1.86E-05 | 0.001154703 | 0.000987455 | 2246/5154/2119/3371/23213/4323/8829/1282/1909/170690/6662/5311/1435/2736/7052/284217                                                     | 16 |
| BP | GO:0010631 | epithelial cell migration                                     | 23/434 | 354/17913 | 1.92E-05 | 0.001154703 | 0.000987455 | 2246/4017/29775/2191/8828/7042/3690/8766/9448/8829/161742/7424/23499/5155/6662/1012/7057/22846/6678/2822/23603/3673/5793                 | 23 |
| BP | GO:0060560 | developmental growth involved in morphogenesis                | 17/434 | 214/17913 | 1.92E-05 | 0.001154703 | 0.000987455 | 342184/2246/1002/2335/8828/3371/8766/51330/8829/23499/10631/6662/3897/1435/3984/51393/55083                                              | 17 |

|    |            |                                           |        |           |          |             |             |                                                                                                                                |    |
|----|------------|-------------------------------------------|--------|-----------|----------|-------------|-------------|--------------------------------------------------------------------------------------------------------------------------------|----|
| BP | GO:0001101 | response to acid chemical                 | 22/434 | 330/17913 | 1.96E-05 | 0.001159269 | 0.000991359 | 56034/3371/1307/1290/80781/1291/1282/1277/1281/5155/6662/2729/1278/5159/81029/6678/5311/7097/3673/7292/340485/824              | 22 |
| BP | GO:0060541 | respiratory system development            | 16/434 | 193/17913 | 1.99E-05 | 0.001159269 | 0.000991359 | 2246/5154/3371/9509/84695/57333/4323/3976/6662/5159/6678/53834/2736/9242/284217/23414                                          | 16 |
| BP | GO:0090132 | epithelium migration                      | 23/434 | 357/17913 | 2.19E-05 | 0.00125808  | 0.001075858 | 2246/4017/29775/2191/8828/7042/3690/8766/9448/8829/161742/7424/23499/5155/6662/1012/7057/22846/6678/2822/23603/3673/5793       | 23 |
| BP | GO:0045765 | regulation of angiogenesis                | 24/434 | 383/17913 | 2.29E-05 | 0.001295485 | 0.001107846 | 8091/2246/29775/1284/7042/8877/23213/51330/3678/8829/161742/6237/2152/11117/7057/22846/6678/7058/861/8038/3696/90993/3339/1893 | 24 |
| BP | GO:0007045 | cell-substrate adherens junction assembly | 10/434 | 81/17913  | 2.54E-05 | 0.001395987 | 0.001193791 | 87/342184/1307/4323/9448/8829/23499/7057/23603/3673                                                                            | 10 |
| BP | GO:0048041 | focal adhesion assembly                   | 10/434 | 81/17913  | 2.54E-05 | 0.001395987 | 0.001193791 | 87/342184/1307/4323/9448/8829/23499/7057/23603/3673                                                                            | 10 |
| BP | GO:0060562 | epithelial tube morphogenesis             | 21/434 | 313/17913 | 2.75E-05 | 0.001487134 | 0.001271736 | 81792/342184/2246/57822/2119/3371/7042/115908/4323/8829/2535/1282/9645/1909/170690/6662/5311/1435/2736/284217/55083            | 21 |
| BP | GO:0090130 | tissue migration                          | 23/434 | 363/17913 | 2.85E-05 | 0.001505468 | 0.001287414 | 2246/4017/29775/2191/8828/7042/3690/8766/9448/8829/161742/7424/23499/5155/6662/1012/7057/22846/6678/2822/23603/3673/5793       | 23 |
| BP | GO:0061035 | regulation of cartilage development       | 9/434  | 66/17913  | 2.88E-05 | 0.001505468 | 0.001287414 | 81792/649/4017/4094/7227/6662/860/2736/658                                                                                     | 9  |
| BP | GO:0071229 | cellular response to acid chemical        | 16/434 | 199/17913 | 2.90E-05 | 0.001505468 | 0.001287414 | 56034/3371/1307/1290/1291/1282/1277/1281/5155/6662/2729/1278/81029/5311/7292/824                                               | 16 |

|    |            |                                                           |        |           |          |             |             |                                                                                                              |    |
|----|------------|-----------------------------------------------------------|--------|-----------|----------|-------------|-------------|--------------------------------------------------------------------------------------------------------------|----|
| BP | GO:0072273 | metanephric nephron morphogenesis                         | 6/434  | 26/17913  | 2.98E-05 | 0.001526442 | 0.00130535  | 342184/3976/6662/5159/5311/55083                                                                             | 6  |
| BP | GO:0072001 | renal system development                                  | 20/434 | 291/17913 | 3.02E-05 | 0.001528038 | 0.001306716 | 342184/2246/55959/84662/5154/25937/7042/23213/8829/9244/1282/3976/170690/5155/6662/5159/5311/2736/5017/55083 | 20 |
| BP | GO:0044344 | cellular response to fibroblast growth factor stimulus    | 13/434 | 138/17913 | 3.14E-05 | 0.00156696  | 0.00134     | 2246/55959/56975/23213/161742/1277/10631/2729/7057/860/3730/53834/90993                                      | 13 |
| BP | GO:0007266 | Rho protein signal transduction                           | 14/434 | 159/17913 | 3.36E-05 | 0.00165166  | 0.001412432 | 26230/9639/8829/7204/64857/1281/1012/1278/5159/55785/9828/2149/3984/55701                                    | 14 |
| BP | GO:0010632 | regulation of epithelial cell migration                   | 20/434 | 294/17913 | 3.50E-05 | 0.001699495 | 0.001453338 | 2246/29775/8828/7042/3690/8766/9448/8829/161742/7424/23499/5155/6662/7057/22846/6678/2822/23603/3673/5793    | 20 |
| BP | GO:0001822 | kidney development                                        | 19/434 | 276/17913 | 4.66E-05 | 0.002233752 | 0.001910213 | 342184/2246/55959/84662/5154/25937/7042/23213/8829/9244/3976/170690/5155/6662/5159/5311/2736/5017/55083      | 19 |
| BP | GO:0048008 | platelet-derived growth factor receptor signaling pathway | 8/434  | 55/17913  | 5.00E-05 | 0.002366934 | 0.002024105 | 56034/5154/8829/5782/2152/5155/5159/5739                                                                     | 8  |
| BP | GO:0072210 | metanephric nephron development                           | 7/434  | 41/17913  | 5.15E-05 | 0.002379614 | 0.002034949 | 342184/3976/5155/6662/5159/5311/55083                                                                        | 7  |
| BP | GO:1903053 | regulation of extracellular matrix                        | 7/434  | 41/17913  | 5.15E-05 | 0.002379614 | 0.002034949 | 4241/23187/2191/84168/165/11117/6662                                                                         | 7  |

|    |            |                                                               |        |           |          |             |             |                                                                                                           |    |
|----|------------|---------------------------------------------------------------|--------|-----------|----------|-------------|-------------|-----------------------------------------------------------------------------------------------------------|----|
|    |            | organization                                                  |        |           |          |             |             |                                                                                                           |    |
| BP | GO:0048754 | branching morphogenesis of an epithelial tube                 | 13/434 | 146/17913 | 5.67E-05 | 0.002590549 | 0.002215331 | 2246/2119/3371/4323/8829/1282/1909/170690/6662/5311/1435/2736/284217                                      | 13 |
| BP | GO:0050772 | positive regulation of axonogenesis                           | 9/434  | 72/17913  | 5.84E-05 | 0.002632982 | 0.002251618 | 1002/2335/8766/51330/8829/23499/3897/3984/51393                                                           | 9  |
| BP | GO:0034333 | adherens junction assembly                                    | 10/434 | 90/17913  | 6.38E-05 | 0.002843867 | 0.002431958 | 87/342184/1307/4323/9448/8829/23499/7057/23603/3673                                                       | 10 |
| BP | GO:0030324 | lung development                                              | 14/434 | 169/17913 | 6.56E-05 | 0.002892039 | 0.002473153 | 2246/5154/3371/9509/84695/57333/4323/3976/6662/5159/6678/2736/284217/23414                                | 14 |
| BP | GO:0006909 | phagocytosis                                                  | 20/434 | 308/17913 | 6.70E-05 | 0.002920779 | 0.00249773  | 558/4240/6556/8877/3690/196051/3685/140885/4651/10417/2212/3684/7057/23603/7097/3673/7052/11031/4688/3984 | 20 |
| BP | GO:0030193 | regulation of blood coagulation                               | 9/434  | 74/17913  | 7.26E-05 | 0.003127405 | 0.002674428 | 2191/5154/5328/2152/5155/5592/7057/2149/5329                                                              | 9  |
| BP | GO:0046578 | regulation of Ras protein signal transduction                 | 16/434 | 215/17913 | 7.37E-05 | 0.00313663  | 0.002682317 | 26230/7042/9639/9448/8829/22821/7204/2048/64857/1281/5159/55785/9828/2149/1435/55701                      | 16 |
| BP | GO:1900046 | regulation of hemostasis                                      | 9/434  | 75/17913  | 8.08E-05 | 0.003401605 | 0.002908913 | 2191/5154/5328/2152/5155/5592/7057/2149/5329                                                              | 9  |
| BP | GO:0048010 | vascular endothelial growth factor receptor signaling pathway | 10/434 | 93/17913  | 8.45E-05 | 0.003444575 | 0.002945659 | 558/8828/3690/23213/3685/3678/8829/7424/11117/4688                                                        | 10 |

|    |            |                                                                   |        |           |             |             |             |                                                                                                          |    |
|----|------------|-------------------------------------------------------------------|--------|-----------|-------------|-------------|-------------|----------------------------------------------------------------------------------------------------------|----|
| BP | GO:0010634 | positive regulation of epithelial cell migration                  | 14/434 | 173/17913 | 8.45E-05    | 0.003444575 | 0.002945659 | 2246/8828/7042/3690/8766/9448/8829/7424/5155/6662/7057/6678/2822/3673                                    | 14 |
| BP | GO:0030323 | respiratory tube development                                      | 14/434 | 173/17913 | 8.45E-05    | 0.003444575 | 0.002945659 | 2246/5154/3371/9509/84695/57333/4323/3976/6662/5159/6678/2736/284217/23414                               | 14 |
| BP | GO:0070371 | ERK1 and ERK2 cascade                                             | 19/434 | 289/17913 | 8.62E-05    | 0.003475439 | 0.002972053 | 2335/5154/112464/3685/140885/8829/50507/161742/6237/3976/2048/111117/5155/6662/5159/8000/2149/91662/6098 | 19 |
| BP | GO:0030516 | regulation of axon extension                                      | 9/434  | 76/17913  | 8.97E-05    | 0.003578377 | 0.003060081 | 1002/2335/8766/51330/8829/23499/3897/3984/51393                                                          | 9  |
| BP | GO:0040036 | regulation of fibroblast growth factor receptor signaling pathway | 6/434  | 32/17913  | 0.000103727 | 0.00407025  | 0.003480711 | 55959/56975/23213/7057/860/90993                                                                         | 6  |
| BP | GO:0051893 | regulation of focal adhesion assembly                             | 8/434  | 61/17913  | 0.000106461 | 0.00407025  | 0.003480711 | 342184/1307/4323/9448/8829/23499/7057/23603                                                              | 8  |
| BP | GO:0090109 | regulation of cell-substrate junction assembly                    | 8/434  | 61/17913  | 0.000106461 | 0.00407025  | 0.003480711 | 342184/1307/4323/9448/8829/23499/7057/23603                                                              | 8  |
| BP | GO:0048762 | mesenchymal cell differentiation                                  | 15/434 | 199/17913 | 0.000106557 | 0.00407025  | 0.003480711 | 8091/23187/7041/4017/359845/2335/8828/84695/25937/7042/8829/1277/1909/6662/23603                         | 15 |
| BP | GO:0001649 | osteoblast differentiation                                        | 16/434 | 222/17913 | 0.000107394 | 0.00407025  | 0.003480711 | 9260/9902/3371/56975/25937/115908/23601/1291/1462/1021/1277/22801/860/2736/90993                         | 16 |

|    |            |                                                                          |        |           |             |             |             |                                                                                                                    |    |
|----|------------|--------------------------------------------------------------------------|--------|-----------|-------------|-------------|-------------|--------------------------------------------------------------------------------------------------------------------|----|
|    |            | n                                                                        |        |           |             |             | 11          | /658                                                                                                               |    |
| BP | GO:0007162 | negative regulation of cell adhesion                                     | 18/434 | 271/17913 | 0.00015697  | 0.004304876 | 0.003681354 | 7045/3956/4241/3371/84695/91663/4323/9448/1277/10631/6695/5592/1012/7057/23603/861/7292/340485                     | 18 |
| BP | GO:0006790 | sulfur compound metabolic process                                        | 21/434 | 346/17913 | 0.00015857  | 0.004304876 | 0.003681354 | 50515/7915/51363/10402/29940/8534/64087/50507/23597/55454/3417/1462/9645/633/337876/2729/2687/1622/9469/56922/9060 | 21 |
| BP | GO:0050818 | regulation of coagulation                                                | 9/434  | 79/17913  | 0.000121555 | 0.004472758 | 0.003824919 | 2191/5154/5328/2152/5155/5592/7057/2149/5329                                                                       | 9  |
| BP | GO:0003338 | metanephros morphogenesis                                                | 6/434  | 33/17913  | 0.000124208 | 0.00452642  | 0.003870809 | 342184/3976/6662/5159/5311/55083                                                                                   | 6  |
| BP | GO:0007178 | transmembrane receptor protein serine/threonine kinase signaling pathway | 20/434 | 323/17913 | 0.000128251 | 0.004629253 | 0.003958747 | 56937/3624/4053/3693/7041/50515/135228/25937/7042/23213/7431/7791/1281/11117/94031/1278/7057/53918/860/658         | 20 |
| BP | GO:0007265 | Ras protein signal transduction                                          | 20/434 | 324/17913 | 0.000133695 | 0.004754967 | 0.004066253 | 26230/7042/9639/9448/8829/22821/7204/6237/2048/64857/1281/1012/1278/5159/55785/9828/2149/1435/3984/55701           | 20 |
| BP | GO:2000027 | regulation of animal organ morphogenesis                                 | 17/434 | 250/17913 | 0.000134243 | 0.004754967 | 0.004066253 | 2246/55959/57822/5154/2119/7042/115908/23213/51339/2535/3976/2239/10082/6662/860/1435/4919                         | 17 |
| BP | GO:0010770 | positive regulation of cell morphogenesis involved                       | 12/434 | 138/17913 | 0.00013643  | 0.004760878 | 0.004071308 | 2316/1002/2335/91663/8766/51330/8829/1627/23499/3897/3984/51393                                                    | 12 |

|    |            |                                                           |        |           |             |             |             |                                                                                                                          |    |
|----|------------|-----------------------------------------------------------|--------|-----------|-------------|-------------|-------------|--------------------------------------------------------------------------------------------------------------------------|----|
|    |            | in differentiation                                        |        |           |             |             |             |                                                                                                                          |    |
| BP | GO:1905330 | regulation of morphogenesis of an epithelium              | 14/434 | 181/17913 | 0.000136922 | 0.004760878 | 0.004071308 | 81792/2246/57822/5154/2119/115908/23213/51339/2535/3976/2239/10082/6662/4919                                             | 14 |
| BP | GO:0090287 | regulation of cellular response to growth factor stimulus | 18/434 | 276/17913 | 0.000145523 | 0.005013942 | 0.004287718 | 56937/81792/2246/55959/7041/50515/135228/56975/3690/23213/3678/7424/11117/940317/057/53918/860/90993                     | 18 |
| BP | GO:0010712 | regulation of collagen metabolic process                  | 7/434  | 49/17913  | 0.000166515 | 0.005634743 | 0.004818601 | 2191/7431/11117/5159/2149/3673/90993                                                                                     | 7  |
| BP | GO:0030195 | negative regulation of blood coagulation                  | 7/434  | 49/17913  | 0.000166515 | 0.005634743 | 0.004818601 | 2191/5154/5328/5155/5592/7057/5329                                                                                       | 7  |
| BP | GO:0048675 | axon extension                                            | 10/434 | 101/17913 | 0.000169155 | 0.005673442 | 0.004851695 | 1002/2335/8828/8766/51330/8829/23499/3897/3984/51393                                                                     | 10 |
| BP | GO:0048839 | inner ear development                                     | 14/434 | 185/17913 | 0.000172333 | 0.005729331 | 0.004899489 | 57822/4094/7042/115908/4610/2535/2048/1301/6662/5159/6678/2736/1687/4919                                                 | 14 |
| BP | GO:0007596 | blood coagulation                                         | 20/434 | 331/17913 | 0.000177856 | 0.005841364 | 0.004995295 | 2316/2191/5154/3690/5328/308/1277/2152/1281/5155/5592/1278/7057/2149/3673/30846/9060/5329/5265/23414                     | 20 |
| BP | GO:0072006 | nephron development                                       | 12/434 | 142/17913 | 0.000178786 | 0.005841364 | 0.004995295 | 342184/2246/55959/25937/23213/3976/170690/5155/6662/5159/5311/55083                                                      | 12 |
| BP | GO:0007264 | small GTPase mediated                                     | 25/434 | 465/17913 | 0.000183218 | 0.005935002 | 0.005075371 | 26230/7042/9732/9639/58504/9448/8829/22821/7204/6237/2048/64857/1281/1012/1278/5159/55785/9828/2149/1435/85360/3984/1126 | 25 |

|    |            |                                                 |        |           |             |             |             |                                                                                                      |    |
|----|------------|-------------------------------------------------|--------|-----------|-------------|-------------|-------------|------------------------------------------------------------------------------------------------------|----|
|    |            | signal transduction                             |        |           |             |             |             | 1/57186/55701                                                                                        |    |
| BP | GO:1900047 | negative regulation of hemostasis               | 7/434  | 50/17913  | 0.000189636 | 0.00609084  | 0.005208636 | 2191/5154/5328/5155/5592/7057/5329                                                                   | 7  |
| BP | GO:0072215 | regulation of metanephros development           | 5/434  | 23/17913  | 0.000191375 | 0.006095048 | 0.005212235 | 5154/25937/3976/5155/5159                                                                            | 5  |
| BP | GO:0070208 | protein heterotrimerization                     | 4/434  | 13/17913  | 0.000204243 | 0.006450664 | 0.005516344 | 1291/1292/1277/1278                                                                                  | 4  |
| BP | GO:1903391 | regulation of adherens junction organization    | 8/434  | 67/17913  | 0.000207784 | 0.006508289 | 0.005565622 | 342184/1307/4323/9448/8829/23499/7057/23603                                                          | 8  |
| BP | GO:0001954 | positive regulation of cell-matrix adhesion     | 7/434  | 51/17913  | 0.000215281 | 0.006521621 | 0.005577023 | 342184/1307/9448/8829/1021/1012/1435                                                                 | 7  |
| BP | GO:0048146 | positive regulation of fibroblast proliferation | 7/434  | 51/17913  | 0.000215281 | 0.006521621 | 0.005577023 | 56034/2335/5154/8877/1021/5155/5159                                                                  | 7  |
| BP | GO:0008360 | regulation of cell shape                        | 11/434 | 124/17913 | 0.000215985 | 0.006521621 | 0.005577023 | 114299/2335/4651/91010/4478/2035/57194/55785/11135/7168/29780                                        | 11 |
| BP | GO:0035023 | regulation of Rho protein signal transduction   | 11/434 | 124/17913 | 0.000215985 | 0.006521621 | 0.005577023 | 26230/9639/8829/7204/64857/1281/5159/55785/9828/2149/55701                                           | 11 |
| BP | GO:0007599 | hemostasis                                      | 20/434 | 336/17913 | 0.000216814 | 0.006521621 | 0.005577023 | 2316/2191/5154/3690/5328/308/1277/2152/1281/5155/5592/1278/7057/2149/3673/30846/9060/5329/5265/23414 | 20 |
| BP | GO:00      | regulation of                                   | 26/434 | 499/17913 | 0.0002      | 0.006675    | 0.005       | 2316/9612/57822/2191/5154/3690/8766/5328                                                             | 26 |



|    |            |                                                                |        |           |             |             |             |                                                                                                                 |    |
|----|------------|----------------------------------------------------------------|--------|-----------|-------------|-------------|-------------|-----------------------------------------------------------------------------------------------------------------|----|
|    | 50878      | body fluid levels                                              |        | 3         | 23922       | 362         | 7084<br>96  | /113/308/1277/2152/2048/1281/5155/5592/1278/6338/7057/2149/3673/30846/9060/5329/5265/23414                      |    |
| BP | GO:0050817 | coagulation                                                    | 20/434 | 337/17913 | 0.000225448 | 0.006675362 | 0.005708496 | 2316/2191/5154/3690/5328/308/1277/2152/1281/5155/5592/1278/7057/2149/3673/30846/9060/5329/5265/23414            | 20 |
| BP | GO:0090103 | cochlea morphogenesis                                          | 5/434  | 24/17913  | 0.000236959 | 0.006961823 | 0.005953466 | 57822/115908/2535/6662/2736                                                                                     | 5  |
| BP | GO:0030574 | collagen catabolic process                                     | 6/434  | 37/17913  | 0.000240231 | 0.007003666 | 0.005989248 | 9902/2191/9509/140766/4323/1508                                                                                 | 6  |
| BP | GO:0043200 | response to amino acid                                         | 10/434 | 106/17913 | 0.000251955 | 0.007289378 | 0.006233577 | 56034/1307/1290/1291/1282/1277/1281/2729/1278/824                                                               | 10 |
| BP | GO:0050808 | synapse organization                                           | 22/434 | 394/17913 | 0.000262729 | 0.007543501 | 0.006450893 | 87/8828/2119/3371/58504/8829/1000/1282/1627/2048/2239/3897/54434/1821/3684/6678/7058/2149/7097/22891/5098/11346 | 22 |
| BP | GO:0051056 | regulation of small GTPase mediated signal transduction        | 19/434 | 316/17913 | 0.000272976 | 0.007759433 | 0.006635549 | 26230/7042/9639/58504/9448/8829/22821/7204/2048/64857/1281/5159/55785/9828/2149/1435/85360/57186/55701          | 19 |
| BP | GO:0050819 | negative regulation of coagulation                             | 7/434  | 53/17913  | 0.000274955 | 0.007759433 | 0.006635549 | 2191/5154/5328/5155/5592/7057/5329                                                                              | 7  |
| BP | GO:0043277 | apoptotic cell clearance                                       | 6/434  | 38/17913  | 0.000279505 | 0.007759433 | 0.006635549 | 558/4240/3690/3685/7057/7052                                                                                    | 6  |
| BP | GO:0035791 | platelet-derived growth factor receptor-beta signaling pathway | 4/434  | 14/17913  | 0.000280486 | 0.007759433 | 0.006635549 | 5154/5782/5155/5159                                                                                             | 4  |

|    |            |                                                      |        |           |             |             |             |                                                                                                                         |    |
|----|------------|------------------------------------------------------|--------|-----------|-------------|-------------|-------------|-------------------------------------------------------------------------------------------------------------------------|----|
| BP | GO:0072216 | positive regulation of metanephros development       | 4/434  | 14/17913  | 0.000280486 | 0.007759433 | 0.006635549 | 5154/3976/5155/5159                                                                                                     | 4  |
| BP | GO:0050673 | epithelial cell proliferation                        | 23/434 | 425/17913 | 0.000299951 | 0.00823778  | 0.007044612 | 2246/55959/4017/135228/2191/8828/7042/3690/23213/4323/8829/1295/1021/2152/1296/5155/6662/1012/7057/22846/6678/9572/1893 | 23 |
| BP | GO:0008543 | fibroblast growth factor receptor signaling pathway  | 10/434 | 109/17913 | 0.000316246 | 0.008622825 | 0.007373887 | 2246/55959/56975/23213/161742/7057/860/3730/53834/90993                                                                 | 10 |
| BP | GO:0061387 | regulation of extent of cell growth                  | 9/434  | 90/17913  | 0.000330119 | 0.008873424 | 0.007588188 | 1002/2335/8766/51330/8829/23499/3897/3984/51393                                                                         | 9  |
| BP | GO:1901888 | regulation of cell junction assembly                 | 9/434  | 90/17913  | 0.000330119 | 0.008873424 | 0.007588188 | 342184/1307/4323/9448/8829/23499/7057/23603/861                                                                         | 9  |
| BP | GO:0070372 | regulation of ERK1 and ERK2 cascade                  | 17/434 | 271/17913 | 0.00034809  | 0.009290561 | 0.007944907 | 2335/5154/112464/140885/8829/50507/161742/6237/3976/2048/11117/5155/5159/8000/2149/91662/6098                           | 17 |
| BP | GO:0032967 | positive regulation of collagen biosynthetic process | 5/434  | 26/17913  | 0.000352383 | 0.009339379 | 0.007986654 | 7431/5159/2149/3673/90993                                                                                               | 5  |
| BP | GO:0001656 | metanephros development                              | 9/434  | 91/17913  | 0.000358655 | 0.009439593 | 0.008072353 | 342184/5154/25937/3976/5155/6662/5159/5311/55083                                                                        | 9  |
| BP | GO:0050651 | dermatan sulfate                                     | 4/434  | 15/17913  | 0.000375192 | 0.009797999 | 0.0083788   | 29940/55454/1462/633                                                                                                    | 4  |

|    |            |                                                    |        |           |             |             |             |                                                                        |    |
|----|------------|----------------------------------------------------|--------|-----------|-------------|-------------|-------------|------------------------------------------------------------------------|----|
|    |            | proteoglycan biosynthetic process                  |        |           |             |             | 47          |                                                                        |    |
| BP | GO:0061045 | negative regulation of wound healing               | 8/434  | 73/17913  | 0.000377443 | 0.009797999 | 0.008378847 | 135228/2191/5154/5328/5155/5592/7057/5329                              | 8  |
| BP | GO:0010714 | positive regulation of collagen metabolic process  | 5/434  | 27/17913  | 0.000423938 | 0.010930102 | 0.009346975 | 7431/5159/2149/3673/90993                                              | 5  |
| BP | GO:0001953 | negative regulation of cell-matrix adhesion        | 6/434  | 42/17913  | 0.000489479 | 0.012397122 | 0.010601511 | 4323/9448/10631/7057/23603/340485                                      | 6  |
| BP | GO:0050655 | dermatan sulfate proteoglycan metabolic process    | 4/434  | 16/17913  | 0.00049073  | 0.012397122 | 0.010601511 | 29940/55454/1462/633                                                   | 4  |
| BP | GO:0060993 | kidney morphogenesis                               | 9/434  | 95/17913  | 0.000493922 | 0.012397122 | 0.010601511 | 342184/2246/25937/3976/170690/6662/5159/5311/55083                     | 9  |
| BP | GO:0061326 | renal tubule development                           | 9/434  | 95/17913  | 0.000493922 | 0.012397122 | 0.010601511 | 342184/2246/25937/1282/3976/170690/6662/5311/55083                     | 9  |
| BP | GO:0085029 | extracellular matrix assembly                      | 5/434  | 28/17913  | 0.000505923 | 0.012614783 | 0.010787645 | 30008/84168/11117/6662/1278                                            | 5  |
| BP | GO:0007179 | transforming growth factor beta receptor signaling | 13/434 | 184/17913 | 0.000563777 | 0.013965461 | 0.01194269  | 56937/4053/3693/7041/50515/135228/7042/7791/1281/11117/94031/1278/7057 | 13 |

|    |            | pathway                                                                    |        |           |             |             |             |                                                                                       |    |
|----|------------|----------------------------------------------------------------------------|--------|-----------|-------------|-------------|-------------|---------------------------------------------------------------------------------------|----|
| BP | GO:0001935 | endothelial cell proliferation                                             | 13/434 | 185/17913 | 0.000593363 | 0.014602896 | 0.012487798 | 4017/8828/3690/23213/4323/8829/2152/5155/1012/7057/22846/6678/1893                    | 13 |
| BP | GO:0040037 | negative regulation of fibroblast growth factor receptor signaling pathway | 4/434  | 17/17913  | 0.000629515 | 0.015217743 | 0.01301359  | 55959/23213/7057/90993                                                                | 4  |
| BP | GO:0061298 | retina vasculature development in camera-type eye                          | 4/434  | 17/17913  | 0.000629515 | 0.015217743 | 0.01301359  | 8829/1282/5159/284217                                                                 | 4  |
| BP | GO:0032965 | regulation of collagen biosynthetic process                                | 6/434  | 44/17913  | 0.000632366 | 0.015217743 | 0.01301359  | 7431/11117/5159/2149/3673/90993                                                       | 6  |
| BP | GO:0010769 | regulation of cell morphogenesis involved in differentiation               | 16/434 | 260/17913 | 0.000634407 | 0.015217743 | 0.01301359  | 2316/4241/1002/2335/91663/8766/51330/8829/1627/23499/2048/10631/3897/23603/3984/51393 | 16 |
| BP | GO:0072028 | nephron morphogenesis                                                      | 8/434  | 79/17913  | 0.000645819 | 0.015394039 | 0.013164351 | 342184/2246/3976/170690/6662/5159/5311/55083                                          | 8  |
| BP | GO:0043583 | ear development                                                            | 14/434 | 212/17913 | 0.000687552 | 0.016286391 | 0.013927454 | 57822/4094/7042/115908/4610/2535/2048/1301/6662/5159/6678/2736/1687/4919              | 14 |
| BP | GO:00      | regulation of                                                              | 11/434 | 143/1791  | 0.0007      | 0.017246    | 0.014       | 135228/2191/5154/51330/5328/2152/5155/55                                              | 11 |

|    |            |                                                |        |               |                 |                 |                     |                                                                                                                  |    |
|----|------------|------------------------------------------------|--------|---------------|-----------------|-----------------|---------------------|------------------------------------------------------------------------------------------------------------------|----|
|    | 61041      | wound healing                                  |        | 3             | 32634           | 488             | 7484<br>89          | 92/7057/2149/5329                                                                                                |    |
| BP | GO:0030307 | positive regulation of cell growth             | 12/434 | 166/1791<br>3 | 0.0007<br>43557 | 0.017395<br>561 | 0.014<br>8759<br>71 | 1002/2335/7042/8877/8766/51330/4323/8829/23499/3897/3984/51393                                                   | 12 |
| BP | GO:0048608 | reproductive structure development             | 22/434 | 426/1791<br>3 | 0.0007<br>54023 | 0.017532<br>186 | 0.014<br>9928<br>06 | 3624/8728/558/2316/3371/7042/23213/4323/3417/3976/5155/6662/5159/10046/22846/79733/5311/1508/2736/3696/658/23414 | 22 |
| BP | GO:0044272 | sulfur compound biosynthetic process           | 13/434 | 190/1791<br>3 | 0.0007<br>61724 | 0.017603<br>261 | 0.015<br>0535<br>87 | 50515/51363/10402/29940/8534/55454/1462/633/337876/2729/2687/9469/9060                                           | 13 |
| BP | GO:1901343 | negative regulation of vasculature development | 13/434 | 191/1791<br>3 | 0.0007<br>99814 | 0.018371<br>484 | 0.015<br>7105<br>4  | 29775/1284/7042/23213/161742/11117/5155/7057/22846/6678/7058/90993/3339                                          | 13 |
| BP | GO:0061036 | positive regulation of cartilage development   | 5/434  | 31/17913      | 0.0008<br>23999 | 0.018683<br>567 | 0.015<br>9774<br>2  | 649/4017/6662/860/658                                                                                            | 5  |
| BP | GO:0061458 | reproductive system development                | 22/434 | 429/1791<br>3 | 0.0008<br>26577 | 0.018683<br>567 | 0.015<br>9774<br>2  | 3624/8728/558/2316/3371/7042/23213/4323/3417/3976/5155/6662/5159/10046/22846/79733/5311/1508/2736/3696/658/23414 | 22 |
| BP | GO:0150063 | visual system development                      | 19/434 | 346/1791<br>3 | 0.0008<br>2819  | 0.018683<br>567 | 0.015<br>9774<br>2  | 3624/57822/1289/7042/1290/7431/8829/1295/1282/2048/1296/6662/5159/3684/84440/81029/4237/658/284217               | 19 |
| BP | GO:1990138 | neuron projection extension                    | 11/434 | 148/1791<br>3 | 0.0009<br>73558 | 0.021490<br>087 | 0.018<br>3774<br>41 | 1002/2335/8828/8766/51330/8829/23499/10631/3897/3984/51393                                                       | 11 |
| BP | GO:0048880 | sensory system                                 | 19/434 | 351/1791<br>3 | 0.0009<br>81344 | 0.021490<br>087 | 0.018<br>3774       | 3624/57822/1289/7042/1290/7431/8829/1295/1282/2048/1296/6662/5159/3684/84440/810                                 | 19 |

|    |            |                                                    |        |           |             |             |             |                                                                                                                                   |    |
|----|------------|----------------------------------------------------|--------|-----------|-------------|-------------|-------------|-----------------------------------------------------------------------------------------------------------------------------------|----|
|    |            | development                                        |        |           |             |             | 41          | 29/4237/658/284217                                                                                                                |    |
| BP | GO:0001502 | cartilage condensation                             | 4/434  | 19/17913  | 0.000986616 | 0.021490087 | 0.018377441 | 649/1301/6662/658                                                                                                                 | 4  |
| BP | GO:0032332 | positive regulation of chondrocyte differentiation | 4/434  | 19/17913  | 0.000986616 | 0.021490087 | 0.018377441 | 4017/6662/860/658                                                                                                                 | 4  |
| BP | GO:0071071 | regulation of phospholipid biosynthetic process    | 4/434  | 19/17913  | 0.000986616 | 0.021490087 | 0.018377441 | 5154/3417/5155/824                                                                                                                | 4  |
| BP | GO:0072077 | renal vesicle morphogenesis                        | 4/434  | 19/17913  | 0.000986616 | 0.021490087 | 0.018377441 | 342184/3976/6662/55083                                                                                                            | 4  |
| BP | GO:0051668 | localization within membrane                       | 10/434 | 126/17913 | 0.000993801 | 0.021522898 | 0.0184055   | 201134/2316/2119/3690/1000/1627/2239/10082/1012/54434                                                                             | 10 |
| BP | GO:0045995 | regulation of embryonic development                | 10/434 | 128/17913 | 0.001121309 | 0.024146365 | 0.020648982 | 23187/57822/1289/91663/23213/1290/2535/3909/3910/284217                                                                           | 10 |
| BP | GO:0035272 | exocrine system development                        | 6/434  | 49/17913  | 0.001131538 | 0.024228986 | 0.020719636 | 5154/7042/8829/6662/7052/284217                                                                                                   | 6  |
| BP | GO:0016055 | Wnt signaling pathway                              | 24/434 | 498/17913 | 0.001152182 | 0.024532407 | 0.020979108 | 55959/7041/57822/25937/5218/115908/23213/64359/1000/815/51339/2535/1277/23499/2239/80114/10082/6662/81029/5311/7097/86183439/4919 | 24 |
| BP | GO:0048568 | embryonic organ development                        | 21/434 | 413/17913 | 0.001197817 | 0.024791691 | 0.021200838 | 56034/50515/57822/5154/7042/115908/4323/2535/3976/9645/2048/1301/5155/6662/2284679733/5311/860/2736/4237/23414                    | 21 |

|    |            |                                             |        |           |             |             |             |                                                                                                                                    |    |
|----|------------|---------------------------------------------|--------|-----------|-------------|-------------|-------------|------------------------------------------------------------------------------------------------------------------------------------|----|
| BP | GO:0010869 | regulation of receptor biosynthetic process | 4/434  | 20/17913  | 0.001209864 | 0.024791691 | 0.021200838 | 3690/3685/22937/9572                                                                                                               | 4  |
| BP | GO:0072087 | renal vesicle development                   | 4/434  | 20/17913  | 0.001209864 | 0.024791691 | 0.021200838 | 342184/3976/6662/55083                                                                                                             | 4  |
| BP | GO:0072234 | metanephric nephron tubule development      | 4/434  | 20/17913  | 0.001209864 | 0.024791691 | 0.021200838 | 25937/3976/6662/5311                                                                                                               | 4  |
| BP | GO:0098743 | cell aggregation                            | 4/434  | 20/17913  | 0.001209864 | 0.024791691 | 0.021200838 | 649/1301/6662/658                                                                                                                  | 4  |
| BP | GO:0001764 | neuron migration                            | 11/434 | 152/17913 | 0.001210433 | 0.024791691 | 0.021200838 | 558/323/2316/8828/8829/815/1281/6695/5592/7155/54820                                                                               | 11 |
| BP | GO:0198738 | cell-cell signaling by wnt                  | 24/434 | 500/17913 | 0.001216257 | 0.024791691 | 0.021200838 | 55959/7041/57822/25937/5218/115908/23213/64359/1000/815/51339/2535/1277/23499/2239/80114/10082/6662/81029/5311/7097/861/83439/4919 | 24 |
| BP | GO:0009612 | response to mechanical stimulus             | 13/434 | 200/17913 | 0.001220525 | 0.024791691 | 0.021200838 | 3371/2115/4323/1277/10631/1301/1281/355/6662/2729/7057/5311/3673                                                                   | 13 |
| BP | GO:1903035 | negative regulation of response to wounding | 8/434  | 87/17913  | 0.001223231 | 0.024791691 | 0.021200838 | 135228/2191/5154/5328/5155/5592/7057/5329                                                                                          | 8  |
| BP | GO:0007435 | salivary gland morphogenesis                | 5/434  | 34/17913  | 0.001271405 | 0.02549537  | 0.021802596 | 5154/7042/8829/7052/284217                                                                                                         | 5  |
| BP | GO:0018149 | peptide cross-linking                       | 5/434  | 34/17913  | 0.001271405 | 0.02549537  | 0.021802596 | 2335/633/1281/7057/7052                                                                                                            | 5  |

|    |            |                                                                    |        |           |             |             |             |                                                                                                        |    |
|----|------------|--------------------------------------------------------------------|--------|-----------|-------------|-------------|-------------|--------------------------------------------------------------------------------------------------------|----|
| BP | GO:0016525 | negative regulation of angiogenesis                                | 12/434 | 177/17913 | 0.001299666 | 0.025924919 | 0.022169928 | 29775/1284/7042/23213/161742/11117/7057/22846/6678/7058/90993/3339                                     | 12 |
| BP | GO:0043687 | post-translational protein modification                            | 19/434 | 360/17913 | 0.001318549 | 0.026163869 | 0.022374268 | 3956/84141/4241/4240/2335/64175/3371/56975/51088/8766/1000/7076/1462/114907/2822/1435/23194/83987/5265 | 19 |
| BP | GO:1900024 | regulation of substrate adhesion-dependent cell spreading          | 6/434  | 51/17913  | 0.001399273 | 0.027621062 | 0.0236204   | 2316/4241/91663/8829/10631/23603                                                                       | 6  |
| BP | GO:2000181 | negative regulation of blood vessel morphogenesis                  | 12/434 | 179/17913 | 0.001430723 | 0.02809554  | 0.024026154 | 29775/1284/7042/23213/161742/11117/7057/22846/6678/7058/90993/3339                                     | 12 |
| BP | GO:0003094 | glomerular filtration                                              | 4/434  | 21/17913  | 0.001466196 | 0.028351448 | 0.024244996 | 55959/23213/5155/2149                                                                                  | 4  |
| BP | GO:0071711 | basement membrane organization                                     | 4/434  | 21/17913  | 0.001466196 | 0.028351448 | 0.024244996 | 23187/3918/1282/22795                                                                                  | 4  |
| BP | GO:1903055 | positive regulation of extracellular matrix organization           | 4/434  | 21/17913  | 0.001466196 | 0.028351448 | 0.024244996 | 4241/23187/11117/6662                                                                                  | 4  |
| BP | GO:0090288 | negative regulation of cellular response to growth factor stimulus | 11/434 | 156/17913 | 0.001492814 | 0.028433214 | 0.024314919 | 56937/81792/55959/7041/50515/135228/23213/11117/94031/7057/90993                                       | 11 |
| BP | GO:00      | low-density                                                        | 3/434  | 10/17913  | 0.0014      | 0.028433    | 0.024       | 3690/3685/22937                                                                                        | 3  |



|    |            |                                                             |        |           |                 |                 |                     |                                                                                                                      |    |
|----|------------|-------------------------------------------------------------|--------|-----------|-----------------|-----------------|---------------------|----------------------------------------------------------------------------------------------------------------------|----|
|    | 45713      | lipoprotein particle receptor biosynthetic process          |        |           | 92931           | 214             | 3149<br>19          |                                                                                                                      |    |
| BP | GO:0061299 | retina vasculature morphogenesis in camera-type eye         | 3/434  | 10/17913  | 0.0014<br>92931 | 0.028433<br>214 | 0.024<br>3149<br>19 | 8829/1282/284217                                                                                                     | 3  |
| BP | GO:0050764 | regulation of phagocytosis                                  | 8/434  | 90/17913  | 0.0015<br>23978 | 0.028879<br>381 | 0.024<br>6964<br>63 | 4240/6556/8877/3685/140885/7097/3673/11031                                                                           | 8  |
| BP | GO:0007409 | axonogenesis                                                | 20/434 | 393/17913 | 0.0015<br>38604 | 0.029011<br>493 | 0.024<br>8094<br>39 | 9260/8609/323/1002/2335/8828/8766/51330/2115/8829/23499/2048/3897/7155/3730/2131/2736/658/3984/51393                 | 20 |
| BP | GO:1904018 | positive regulation of vasculature development              | 14/434 | 232/17913 | 0.0016<br>33843 | 0.030654<br>785 | 0.026<br>2147<br>15 | 8091/2246/8877/3678/8829/7424/6237/2152/5155/7057/861/8038/3696/1893                                                 | 14 |
| BP | GO:0050769 | positive regulation of neurogenesis                         | 22/434 | 455/17913 | 0.0017<br>51498 | 0.032344<br>957 | 0.027<br>6600<br>82 | 2316/1002/2335/2119/64175/8766/51330/8829/7424/23529/1627/3976/23499/2048/3897/23531/1435/7097/2736/22891/3984/51393 | 22 |
| BP | GO:0032799 | low-density lipoprotein receptor particle metabolic process | 4/434  | 22/17913  | 0.0017<br>58064 | 0.032344<br>957 | 0.027<br>6600<br>82 | 3690/3685/22937/29116                                                                                                | 4  |
| BP | GO:0050927 | positive regulation of positive chemotaxis                  | 4/434  | 22/17913  | 0.0017<br>58064 | 0.032344<br>957 | 0.027<br>6600<br>82 | 7424/2152/1012/3673                                                                                                  | 4  |

|    |            |                                             |        |           |             |             |             |                                                                                               |    |
|----|------------|---------------------------------------------|--------|-----------|-------------|-------------|-------------|-----------------------------------------------------------------------------------------------|----|
| BP | GO:0097205 | renal filtration                            | 4/434  | 22/17913  | 0.001758064 | 0.032344957 | 0.027660082 | 55959/23213/5155/2149                                                                         | 4  |
| BP | GO:001654  | eye development                             | 18/434 | 342/17913 | 0.001803426 | 0.033019257 | 0.028236715 | 3624/57822/1289/7042/1290/7431/8829/1295/1282/2048/1296/6662/5159/84440/81029/4237/658/284217 | 18 |
| BP | GO:0072080 | nephron tubule development                  | 8/434  | 93/17913  | 0.00188055  | 0.034105199 | 0.029165368 | 342184/2246/25937/3976/170690/6662/5311/55083                                                 | 8  |
| BP | GO:0070206 | protein trimerization                       | 6/434  | 54/17913  | 0.001888199 | 0.034105199 | 0.029165368 | 1291/1292/1277/111117/1278/241                                                                | 6  |
| BP | GO:0007411 | axon guidance                               | 13/434 | 210/17913 | 0.001889734 | 0.034105199 | 0.029165368 | 9260/8609/323/1002/8828/2115/8829/2048/3897/3730/2131/2736/658                                | 13 |
| BP | GO:0048863 | stem cell differentiation                   | 14/434 | 237/17913 | 0.001992638 | 0.035791931 | 0.030607792 | 8091/2335/8828/7042/8829/81606/1021/3976/4054/1909/6662/860/23603/861                         | 14 |
| BP | GO:0031915 | positive regulation of synaptic plasticity  | 3/434  | 11/17913  | 0.002016041 | 0.035872281 | 0.030676504 | 1627/2048/54434                                                                               | 3  |
| BP | GO:1901201 | regulation of extracellular matrix assembly | 3/434  | 11/17913  | 0.002016041 | 0.035872281 | 0.030676504 | 84168/11117/6662                                                                              | 3  |
| BP | GO:0097485 | neuron projection guidance                  | 13/434 | 212/17913 | 0.002054542 | 0.0359687   | 0.030758958 | 9260/8609/323/1002/8828/2115/8829/2048/3897/3730/2131/2736/658                                | 13 |
| BP | GO:0050866 | negative regulation of cell activation      | 12/434 | 187/17913 | 0.002068889 | 0.0359687   | 0.030758958 | 3624/558/5154/84695/11117/5155/5592/2729/861/7292/9572/133396                                 | 12 |
| BP | GO:0070373 | negative regulation of                      | 7/434  | 74/17913  | 0.002078581 | 0.0359687   | 0.030758958 | 140885/161742/3976/2048/11117/8000/91662                                                      | 7  |

|    |            |                                                       |        |           |             |             |             |                                                        |    |
|----|------------|-------------------------------------------------------|--------|-----------|-------------|-------------|-------------|--------------------------------------------------------|----|
|    |            | ERK1 and ERK2 cascade                                 |        |           |             |             | 58          |                                                        |    |
| BP | GO:0050926 | regulation of positive chemotaxis                     | 4/434  | 23/17913  | 0.002087893 | 0.0359687   | 0.030758958 | 7424/2152/1012/3673                                    | 4  |
| BP | GO:0060445 | branching involved in salivary gland morphogenesis    | 4/434  | 23/17913  | 0.002087893 | 0.0359687   | 0.030758958 | 5154/8829/7052/284217                                  | 4  |
| BP | GO:0072170 | metanephric tubule development                        | 4/434  | 23/17913  | 0.002087893 | 0.0359687   | 0.030758958 | 25937/3976/6662/5311                                   | 4  |
| BP | GO:0072243 | metanephric nephron epithelium development            | 4/434  | 23/17913  | 0.002087893 | 0.0359687   | 0.030758958 | 25937/3976/6662/5311                                   | 4  |
| BP | GO:0007431 | salivary gland development                            | 5/434  | 38/17913  | 0.002118753 | 0.036171505 | 0.030932388 | 5154/7042/8829/7052/284217                             | 5  |
| BP | GO:0071604 | transforming growth factor beta production            | 5/434  | 38/17913  | 0.002118753 | 0.036171505 | 0.030932388 | 7042/3685/4054/7057/3696                               | 5  |
| BP | GO:0014066 | regulation of phosphatidylinositol 3-kinase signaling | 9/434  | 117/17913 | 0.002180085 | 0.037051676 | 0.031685075 | 5154/7042/8870/5155/79899/6662/5159/25827/2149         | 9  |
| BP | GO:0001837 | epithelial to mesenchym                               | 10/434 | 140/17913 | 0.002196376 | 0.037161889 | 0.0317793   | 8091/23187/7041/4017/359845/84695/25937/7042/1277/6662 | 10 |

|    |            |                                                       |        |           |             |             |             |                                                                                                                     |    |
|----|------------|-------------------------------------------------------|--------|-----------|-------------|-------------|-------------|---------------------------------------------------------------------------------------------------------------------|----|
|    |            | al transition                                         |        |           |             |             | 24          |                                                                                                                     |    |
| BP | GO:0060348 | bone development                                      | 12/434 | 189/17913 | 0.00226037  | 0.038074678 | 0.032559904 | 56034/55959/64175/56975/23213/4323/1277/6662/6678/860/9060/658                                                      | 12 |
| BP | GO:0017145 | stem cell division                                    | 5/434  | 39/17913  | 0.002382739 | 0.039958325 | 0.034170722 | 2119/25937/7042/81606/26354                                                                                         | 5  |
| BP | GO:0061564 | axon development                                      | 21/434 | 438/17913 | 0.002441499 | 0.040763357 | 0.034859152 | 9260/8609/323/1002/2335/8828/3371/8766/51330/2115/8829/23499/2048/3897/7155/3730/2131/2736/658/3984/51393           | 21 |
| BP | GO:0032800 | receptor biosynthetic process                         | 4/434  | 24/17913  | 0.00245808  | 0.040860183 | 0.034941953 | 3690/3685/22937/9572                                                                                                | 4  |
| BP | GO:0090183 | regulation of kidney development                      | 6/434  | 57/17913  | 0.002496581 | 0.041318962 | 0.035334283 | 5154/25937/3976/5155/6662/5159                                                                                      | 6  |
| BP | GO:0048708 | astrocyte differentiation                             | 7/434  | 77/17913  | 0.002611194 | 0.042577097 | 0.036410188 | 7431/1021/23529/3976/6662/4919/9572                                                                                 | 7  |
| BP | GO:0072088 | nephron epithelium morphogenesis                      | 7/434  | 77/17913  | 0.002611194 | 0.042577097 | 0.036410188 | 342184/2246/3976/170690/6662/5311/55083                                                                             | 7  |
| BP | GO:0048667 | cell morphogenesis involved in neuron differentiation | 23/434 | 500/17913 | 0.002621791 | 0.042577097 | 0.036410188 | 9260/8609/323/1002/2335/8828/8766/51330/2115/8829/815/1627/23499/2048/3897/7155/3730/2131/2736/22891/658/3984/51393 | 23 |
| BP | GO:0002468 | dendritic cell antigen processing and presentation    | 3/434  | 12/17913  | 0.002640005 | 0.042577097 | 0.036410188 | 6556/7057/50856                                                                                                     | 3  |
| BP | GO:00      | dermatan                                              | 3/434  | 12/17913  | 0.0026      | 0.042577    | 0.036       | 29940/1462/633                                                                                                      | 3  |

|    |            |                                                                  |        |           |             |             |             |                                              |    |
|----|------------|------------------------------------------------------------------|--------|-----------|-------------|-------------|-------------|----------------------------------------------|----|
|    | 30208      | sulfate biosynthetic process                                     |        |           | 40005       | 097         | 410188      |                                              |    |
| BP | GO:0090177 | establishment of planar polarity involved in neural tube closure | 3/434  | 12/17913  | 0.002640005 | 0.042577097 | 0.036410188 | 57822/115908/2535                            | 3  |
| BP | GO:0031952 | regulation of protein autophosphorylation                        | 5/434  | 40/17913  | 0.002669835 | 0.042875741 | 0.036665576 | 5154/7424/5155/91662/11261                   | 5  |
| BP | GO:0032233 | positive regulation of actin filament bundle assembly            | 6/434  | 58/17913  | 0.002728864 | 0.043638802 | 0.037318115 | 2316/9639/8829/50507/7168/3984               | 6  |
| BP | GO:0046718 | viral entry into host cell                                       | 9/434  | 121/17913 | 0.002740936 | 0.043647686 | 0.037325712 | 558/3956/3693/3690/3685/23601/3678/1508/3673 | 9  |
| BP | GO:0042730 | fibrinolysis                                                     | 4/434  | 25/17913  | 0.002870981 | 0.045149449 | 0.038609958 | 2191/5328/7057/5329                          | 4  |
| BP | GO:0051894 | positive regulation of focal adhesion assembly                   | 4/434  | 25/17913  | 0.002870981 | 0.045149449 | 0.038609958 | 342184/1307/9448/8829                        | 4  |
| BP | GO:0060740 | prostate gland epithelium morphogenesis                          | 4/434  | 25/17913  | 0.002870981 | 0.045149449 | 0.038609958 | 3371/23213/6662/2736                         | 4  |
| BP | GO:00      | regulation of                                                    | 11/434 | 170/1791  | 0.0029      | 0.045777    | 0.039       | 8828/3690/23213/8829/2152/5155/1012/7057     | 11 |

|    |            |                                                |        |           |             |             |             |                                                                                |    |
|----|------------|------------------------------------------------|--------|-----------|-------------|-------------|-------------|--------------------------------------------------------------------------------|----|
|    | 01936      | endothelial cell proliferation                 |        | 3         | 35103       | 947         | 1474<br>24  | /22846/6678/1893                                                               |    |
| BP | GO:0048771 | tissue remodeling                              | 11/434 | 170/17913 | 0.002935103 | 0.045777947 | 0.039147424 | 558/115908/3690/4323/50507/7076/3976/633/10609/2149/7052                       | 11 |
| BP | GO:0006911 | phagocytosis, engulfment                       | 5/434  | 41/17913  | 0.002981174 | 0.046116931 | 0.039437309 | 4240/3684/7057/3673/11031                                                      | 5  |
| BP | GO:0090184 | positive regulation of kidney development      | 5/434  | 41/17913  | 0.002981174 | 0.046116931 | 0.039437309 | 5154/3976/5155/6662/5159                                                       | 5  |
| BP | GO:0043542 | endothelial cell migration                     | 15/434 | 275/17913 | 0.003017262 | 0.046348842 | 0.03963563  | 2246/4017/29775/2191/8828/3690/8829/161742/7424/5155/1012/7057/22846/6678/2822 | 15 |
| BP | GO:0061333 | renal tubule morphogenesis                     | 7/434  | 79/17913  | 0.003020624 | 0.046348842 | 0.03963563  | 342184/2246/1282/170690/6662/5311/55083                                        | 7  |
| BP | GO:0050770 | regulation of axonogenesis                     | 10/434 | 148/17913 | 0.003289688 | 0.049902654 | 0.042674704 | 1002/2335/8766/51330/8829/23499/2048/3897/3984/51393                           | 10 |
| BP | GO:0030201 | heparan sulfate proteoglycan metabolic process | 4/434  | 26/17913  | 0.003328908 | 0.049902654 | 0.042674704 | 55959/29940/23213/2131                                                         | 4  |
| BP | GO:0050919 | negative chemotaxis                            | 4/434  | 26/17913  | 0.003328908 | 0.049902654 | 0.042674704 | 5154/8828/3690/3685                                                            | 4  |
| BP | GO:0061437 | renal system vasculature development           | 4/434  | 26/17913  | 0.003328908 | 0.049902654 | 0.042674704 | 8829/5155/5159/5311                                                            | 4  |
| BP | GO:00      | kidney                                         | 4/434  | 26/17913  | 0.0033      | 0.049902    | 0.042       | 8829/5155/5159/5311                                                            | 4  |

|    |            |                                                                    |        |           |             |             |             |                                                                                                                                                                                                                                                                                                                                                                                         |    |
|----|------------|--------------------------------------------------------------------|--------|-----------|-------------|-------------|-------------|-----------------------------------------------------------------------------------------------------------------------------------------------------------------------------------------------------------------------------------------------------------------------------------------------------------------------------------------------------------------------------------------|----|
|    | 61440      | vasculature development                                            |        |           | 28908       | 654         | 674704      |                                                                                                                                                                                                                                                                                                                                                                                         |    |
| BP | GO:1903034 | regulation of response to wounding                                 | 11/434 | 173/17913 | 0.003356589 | 0.049902654 | 0.042674704 | 135228/2191/5154/51330/5328/2152/5155/5592/7057/2149/5329                                                                                                                                                                                                                                                                                                                               | 11 |
| BP | GO:0030205 | dermatan sulfate metabolic process                                 | 3/434  | 13/17913  | 0.003370733 | 0.049902654 | 0.042674704 | 29940/1462/633                                                                                                                                                                                                                                                                                                                                                                          | 3  |
| BP | GO:1900025 | negative regulation of substrate adhesion-dependent cell spreading | 3/434  | 13/17913  | 0.003370733 | 0.049902654 | 0.042674704 | 4241/10631/23603                                                                                                                                                                                                                                                                                                                                                                        | 3  |
| BP | GO:2001044 | regulation of integrin-mediated signaling pathway                  | 3/434  | 13/17913  | 0.003370733 | 0.049902654 | 0.042674704 | 2316/84695/7076                                                                                                                                                                                                                                                                                                                                                                         | 3  |
| CC | GO:0062023 | collagen-containing extracellular matrix                           | 72/457 | 399/18678 | 1.09E-41    | 3.89E-39    | 3.09E-39    | 7045/8728/3956/4053/7041/4017/3918/4240/2335/7837/64175/1289/3371/9509/1284/7042/1307/115908/23213/1290/1294/80781/439921/1000/79883/1291/30008/308/1293/1295/1292/7076/3909/1462/165/1282/3910/1277/633/4054/2152/10631/1301/1300/2239/1281/1296/11117/5155/10082/3897/1012/5118/81794/1278/7057/81029/6678/25878/1508/7058/83872/22795/7052/4237/3339/5265/50509/284217/12/10085/1893 | 72 |
| CC | GO:0031012 | extracellular matrix                                               | 76/457 | 468/18678 | 1.20E-40    | 2.15E-38    | 1.71E-38    | 7045/8728/3956/2246/4053/7041/4017/3918/4240/2335/7837/64175/1289/3371/9509/1284/7042/1307/115908/23213/1290/1294/80781/4323/439921/1000/79883/1291/30008/308/1293/1295/1292/7076/3909/1462/165/1282/3910/1277/633/4054/2152/10631/1301/1300/223                                                                                                                                        | 76 |

|    |            |                                  |        |           |          |          |          |                                                                                                                                                                                                                                                                          |    |
|----|------------|----------------------------------|--------|-----------|----------|----------|----------|--------------------------------------------------------------------------------------------------------------------------------------------------------------------------------------------------------------------------------------------------------------------------|----|
|    |            |                                  |        |           |          |          |          | 9/1281/1296/11117/5155/10082/3897/1012/5118/81794/1278/7057/81029/6678/2822/25878/1508/7058/3730/83872/22795/7052/4237/3339/5265/50509/284217/12/10085/1893                                                                                                              |    |
| CC | GO:0005788 | endoplasmic reticulum lumen      | 45/457 | 306/18678 | 2.21E-22 | 2.64E-20 | 2.10E-20 | 79642/3956/56034/84141/4241/4240/2335/340075/5154/493869/64175/1289/3371/56975/1284/1307/1290/60681/1294/80781/57333/10001291/1293/1295/1292/7076/1462/1282/1277/1301/283208/1300/1281/1296/5155/1278/7057/81029/1622/1435/51148/5329/5265/50509                         | 45 |
| CC | GO:0005925 | focal adhesion                   | 45/457 | 397/18678 | 8.15E-18 | 7.07E-16 | 5.63E-16 | 9260/87/2316/60312/3693/7041/9902/2191/8496/3371/2275/3690/23022/7431/5328/58504/4323/9448/3685/7791/3678/8829/1000/50507/4478/308/2535/5782/6237/143903/3897/1012/5159/11135/22801/91179/23603/3673/7052/824/5329/3984/3339/11261/29780                                 | 45 |
| CC | GO:0005924 | cell-substrate adherens junction | 45/457 | 399/18678 | 9.90E-18 | 7.07E-16 | 5.63E-16 | 9260/87/2316/60312/3693/7041/9902/2191/8496/3371/2275/3690/23022/7431/5328/58504/4323/9448/3685/7791/3678/8829/1000/50507/4478/308/2535/5782/6237/143903/3897/1012/5159/11135/22801/91179/23603/3673/7052/824/5329/3984/3339/11261/29780                                 | 45 |
| CC | GO:0005912 | adherens junction                | 50/457 | 496/18678 | 1.57E-17 | 7.52E-16 | 5.99E-16 | 9260/87/342184/2316/60312/3693/7041/9902/2191/8496/3371/2275/3690/23022/143098/7431/5328/79983/58504/4323/9448/3685/7791/3678/8829/1000/50507/4478/308/2535/5782/6237/143903/3897/1012/5159/11135/22801/91179/23603/3673/7052/58538/824/5329/3984/3339/11261/23150/29780 | 50 |
| CC | GO:0030055 | cell-substrate junction          | 45/457 | 404/18678 | 1.60E-17 | 7.52E-16 | 5.99E-16 | 9260/87/2316/60312/3693/7041/9902/2191/8496/3371/2275/3690/23022/7431/5328/58504/4323/9448/3685/7791/3678/8829/1000/50507/4478/308/2535/5782/6237/143903/3897/1012/5159/11135/22801/91179/23603/3673/7052/824/5329/3984/3339/11261/29780                                 | 45 |



|    |            |                                           |        |           |          |          |          |                                                                                                                                                                   |    |
|----|------------|-------------------------------------------|--------|-----------|----------|----------|----------|-------------------------------------------------------------------------------------------------------------------------------------------------------------------|----|
| CC | GO:0044420 | extracellular matrix component            | 18/457 | 47/18678  | 1.69E-17 | 7.52E-16 | 5.99E-16 | 3918/1289/3371/1284/1290/1294/1295/3909/1282/1277/1301/1281/11117/81794/1278/4237/50509/284217                                                                    | 18 |
| CC | GO:0005604 | basement membrane                         | 22/457 | 91/18678  | 3.18E-16 | 1.26E-14 | 1.00E-14 | 7045/4017/3918/2335/1289/3371/1284/1294/80781/30008/1295/7076/3909/1282/3910/1296/6678/7058/83872/22795/3339/284217                                               | 22 |
| CC | GO:0005581 | collagen trimer                           | 20/457 | 86/18678  | 1.62E-14 | 5.77E-13 | 4.60E-13 | 1289/1284/1307/115908/1290/1294/80781/1291/1293/1295/1292/1282/1277/1301/1300/1281/1296/11117/1278/50509                                                          | 20 |
| CC | GO:0098644 | complex of collagen trimers               | 11/457 | 18/18678  | 4.56E-14 | 1.48E-12 | 1.18E-12 | 1289/1284/1290/1294/1295/1282/1277/1301/1281/1278/50509                                                                                                           | 11 |
| CC | GO:0005583 | fibrillar collagen trimer                 | 7/457  | 11/18678  | 1.52E-09 | 4.18E-08 | 3.32E-08 | 1289/1290/1277/1301/1281/1278/50509                                                                                                                               | 7  |
| CC | GO:0098643 | banded collagen fibril                    | 7/457  | 11/18678  | 1.52E-09 | 4.18E-08 | 3.32E-08 | 1289/1290/1277/1301/1281/1278/50509                                                                                                                               | 7  |
| CC | GO:0031252 | cell leading edge                         | 30/457 | 384/18678 | 2.44E-08 | 6.21E-07 | 4.95E-07 | 9260/26230/87/323/2054/2191/8572/91663/3690/23022/51330/7431/3685/3678/4651/1000/84168/1021/55704/23499/143903/54434/55785/5311/23603/7168/3984/23150/29780/23516 | 30 |
| CC | GO:0008305 | integrin complex                          | 9/457  | 30/18678  | 2.63E-08 | 6.27E-07 | 4.99E-07 | 3693/3690/3685/3678/11117/3684/22801/3673/3696                                                                                                                    | 9  |
| CC | GO:0031091 | platelet alpha granule                    | 14/457 | 91/18678  | 4.33E-08 | 9.65E-07 | 7.69E-07 | 87/135228/2335/5154/7042/3690/7076/7424/5155/7057/6678/7058/5265/12                                                                                               | 14 |
| CC | GO:0098636 | protein complex involved in cell adhesion | 9/457  | 33/18678  | 6.65E-08 | 1.40E-06 | 1.11E-06 | 3693/3690/3685/3678/11117/3684/22801/3673/3696                                                                                                                    | 9  |
| CC | GO:0030027 | lamellipodium                             | 19/457 | 191/18678 | 2.47E-07 | 4.89E-06 | 3.90E-06 | 26230/323/2054/2191/8572/3690/23022/3685/4651/1000/84168/55704/54434/55785/5311/23603/3984/29780/23516                                                            | 19 |

|    |            |                                   |        |           |             |             |             |                                                                                                                                            |    |
|----|------------|-----------------------------------|--------|-----------|-------------|-------------|-------------|--------------------------------------------------------------------------------------------------------------------------------------------|----|
| CC | GO:0031093 | platelet alpha granule lumen      | 11/457 | 67/18678  | 6.24E-07    | 1.17E-05    | 9.33E-06    | 87/2335/5154/7042/7076/7424/5155/7057/6678/5265/12                                                                                         | 11 |
| CC | GO:0001726 | ruffle                            | 17/457 | 168/18678 | 8.32E-07    | 1.49E-05    | 1.18E-05    | 9260/87/2191/91663/3690/23022/51330/3685/3678/4651/1021/23499/143903/55785/23603/7168/23150                                                | 17 |
| CC | GO:0015629 | actin cytoskeleton                | 26/457 | 432/18678 | 2.53E-05    | 0.00042968  | 0.000342071 | 84176/9260/87/342184/2316/60312/8572/91663/23022/79983/7791/4651/1000/50507/7169/5782/1627/800/541468/5311/23603/58538/824/7168/4919/11346 | 26 |
| CC | GO:0042641 | actomyosin                        | 9/457  | 67/18678  | 3.53E-05    | 0.000572764 | 0.000455982 | 9260/87/8572/7791/50507/1627/541468/7168/4919                                                                                              | 9  |
| CC | GO:0098802 | plasma membrane receptor complex  | 13/457 | 153/18678 | 0.00010174  | 0.001579179 | 0.001257197 | 3693/9180/3690/3685/3678/2892/11117/3684/22801/7097/3673/3696/658                                                                          | 13 |
| CC | GO:0005938 | cell cortex                       | 16/457 | 229/18678 | 0.000173008 | 0.00257349  | 0.002048776 | 2246/2316/23187/3918/91663/4651/1000/6764/1627/800/2035/5311/23603/83872/824/26086                                                         | 16 |
| CC | GO:0030139 | endocytic vesicle                 | 18/457 | 289/18678 | 0.000290668 | 0.004150741 | 0.003304438 | 3693/6556/8877/8766/7431/5287/3685/7791/815/2892/84251/2535/84440/81029/6678/7097/11031/4688                                               | 18 |
| CC | GO:0009897 | external side of plasma membrane  | 14/457 | 199/18678 | 0.000404766 | 0.005263607 | 0.0041904   | 4240/3685/3678/84168/308/118429/2152/2239/1012/6338/3684/7057/3673/824                                                                     | 14 |
| CC | GO:0001725 | stress fiber                      | 7/457  | 56/18678  | 0.000412832 | 0.005263607 | 0.0041904   | 9260/87/8572/7791/50507/7168/4919                                                                                                          | 7  |
| CC | GO:0097517 | contractile actin filament bundle | 7/457  | 56/18678  | 0.000412832 | 0.005263607 | 0.0041904   | 9260/87/8572/7791/50507/7168/4919                                                                                                          | 7  |
| CC | GO:0032432 | actin filament bundle             | 7/457  | 59/18678  | 0.000570265 | 0.007020163 | 0.005588807 | 9260/87/8572/7791/50507/7168/4919                                                                                                          | 7  |

|    |            |                                 |        |           |             |             |             |                                                                                                                   |    |
|----|------------|---------------------------------|--------|-----------|-------------|-------------|-------------|-------------------------------------------------------------------------------------------------------------------|----|
| CC | GO:0031527 | filopodium membrane             | 4/457  | 18/18678  | 0.000824052 | 0.009806219 | 0.007806808 | 3690/3685/4651/84168                                                                                              | 4  |
| CC | GO:0005796 | Golgi lumen                     | 9/457  | 102/18678 | 0.000891163 | 0.010262751 | 0.008170258 | 5154/4323/1462/633/2239/5155/10082/81029/3339                                                                     | 9  |
| CC | GO:0030667 | secretory granule membrane      | 17/457 | 293/18678 | 0.000941276 | 0.010501109 | 0.008360016 | 135228/6556/3690/5328/199675/3685/23601/140885/2212/148229/27180/3684/6678/7097/11031/5329/11010                  | 17 |
| CC | GO:0044853 | plasma membrane raft            | 9/457  | 106/18678 | 0.001172955 | 0.012689239 | 0.010102004 | 284119/112464/1000/161742/1012/3684/23603/2149/30846                                                              | 9  |
| CC | GO:0098797 | plasma membrane protein complex | 22/457 | 451/18678 | 0.001783966 | 0.018596599 | 0.0148049   | 3693/2121/6443/9180/3690/143098/3685/3678/1000/2892/84251/11117/355/3684/22801/23603/7097/3673/3696/4688/658/3339 | 22 |
| CC | GO:0031258 | lamellipodium membrane          | 4/457  | 22/18678  | 0.001823196 | 0.018596599 | 0.0148049   | 2191/3690/3685/84168                                                                                              | 4  |
| CC | GO:0005884 | actin filament                  | 7/457  | 74/18678  | 0.002199078 | 0.021807523 | 0.017361142 | 87/342184/2316/8572/23022/79983/5311                                                                              | 7  |
| CC | GO:0043235 | receptor complex                | 16/457 | 292/18678 | 0.002353603 | 0.022709092 | 0.018078888 | 3693/8828/9180/3690/3685/3678/8829/2892/11117/3684/22801/7097/3673/3696/4919/658                                  | 16 |
| CC | GO:0030175 | filopodium                      | 8/457  | 99/18678  | 0.002965534 | 0.027860414 | 0.022179896 | 26230/3690/3685/4651/4478/84168/10123/57451                                                                       | 8  |
| CC | GO:0005901 | caveola                         | 7/457  | 79/18678  | 0.00319234  | 0.029222185 | 0.023264013 | 284119/112464/161742/1012/23603/2149/30846                                                                        | 7  |
| CC | GO:0030863 | cortical cytoskeleton           | 7/457  | 81/18678  | 0.003673559 | 0.032786518 | 0.026101607 | 2316/91663/1000/1627/800/2035/824                                                                                 | 7  |
| CC | GO:0044448 | cell cortex part                | 9/457  | 128/18678 | 0.00426105  | 0.036218926 | 0.0288341   | 2316/23187/91663/1000/1627/800/2035/5311/824                                                                      | 9  |

|    |            |                                                                         |        |           |             |             |             |                                                                                                                                                                                                                                                       |    |
|----|------------|-------------------------------------------------------------------------|--------|-----------|-------------|-------------|-------------|-------------------------------------------------------------------------------------------------------------------------------------------------------------------------------------------------------------------------------------------------------|----|
|    |            |                                                                         |        |           |             |             | 74          |                                                                                                                                                                                                                                                       |    |
| CC | GO:0045335 | phagocytic vesicle                                                      | 9/457  | 128/18678 | 0.00426105  | 0.036218926 | 0.028834174 | 3693/6556/8766/7431/3685/7791/7097/11031/4688                                                                                                                                                                                                         | 9  |
| CC | GO:0034774 | secretory granule lumen                                                 | 16/457 | 321/18678 | 0.005871633 | 0.048748207 | 0.038808833 | 87/2335/5154/7042/3417/7076/7424/126014/5155/7057/3101/6678/978/5265/12/1893                                                                                                                                                                          | 16 |
| MF | GO:0005201 | extracellular matrix structural constituent                             | 47/426 | 158/16969 | 1.62E-37    | 9.04E-35    | 7.99E-35    | 7045/4053/3918/4240/2335/7837/1289/3371/1284/1307/115908/1290/1294/80781/1291/30008/1293/1295/1292/3909/1462/165/1282/3910/1277/633/10631/1301/1300/1281/1296/11117/5118/1278/7057/6678/25878/7058/3730/83872/22795/4237/3339/50509/284217/10085/1893 | 47 |
| MF | GO:0030020 | extracellular matrix structural constituent conferring tensile strength | 18/426 | 41/16969  | 1.31E-18    | 3.66E-16    | 3.23E-16    | 1289/1284/1307/1290/1294/80781/1291/1293/1295/1292/1282/1277/1301/1300/1281/1296/1278/50509                                                                                                                                                           | 18 |
| MF | GO:0048407 | platelet-derived growth factor binding                                  | 9/426  | 11/16969  | 1.92E-13    | 3.57E-11    | 3.16E-11    | 5154/1289/1291/1282/1277/1281/5155/1278/5159                                                                                                                                                                                                          | 9  |
| MF | GO:0005518 | collagen binding                                                        | 16/426 | 61/16969  | 1.36E-12    | 1.90E-10    | 1.68E-10    | 7045/9902/2335/5154/64175/84168/165/5155/5118/22801/7057/6678/1508/3673/22795/50509                                                                                                                                                                   | 16 |
| MF | GO:0019838 | growth factor binding                                                   | 20/426 | 121/16969 | 2.18E-11    | 2.44E-09    | 2.15E-09    | 4053/135228/5154/8828/7837/1289/9180/3690/3685/8829/1291/1282/1277/4054/1281/5155/94031/1278/5159/7057                                                                                                                                                | 20 |
| MF | GO:0005178 | integrin binding                                                        | 17/426 | 113/16969 | 3.16E-09    | 2.95E-07    | 2.60E-07    | 7045/87/2246/2191/4240/2335/1289/1307/3690/4323/3685/3678/1281/11117/7057/3673/10085                                                                                                                                                                  | 17 |
| MF | GO:0005161 | platelet-derived growth                                                 | 6/426  | 14/16969  | 6.12E-07    | 4.71E-05    | 4.16E-05    | 56034/5154/3690/3678/5155/5159                                                                                                                                                                                                                        | 6  |

|    |            |                                |        |           |          |             |             |                                                                                                                                            |    |
|----|------------|--------------------------------|--------|-----------|----------|-------------|-------------|--------------------------------------------------------------------------------------------------------------------------------------------|----|
|    |            | factor receptor binding        |        |           |          |             |             |                                                                                                                                            |    |
| MF | GO:0005539 | glycosaminoglycan binding      | 19/426 | 199/16969 | 6.74E-07 | 4.71E-05    | 4.16E-05    | 2246/4053/3918/2335/8828/1289/8829/7130/1462/633/10631/1301/143903/5118/7057/7058/7097/3730/53834                                          | 19 |
| MF | GO:0050840 | extracellular matrix binding   | 9/426  | 43/16969  | 9.63E-07 | 5.98E-05    | 5.28E-05    | 7045/3956/3690/3685/633/1301/7057/3673/1893                                                                                                | 9  |
| MF | GO:0004222 | metalloendopeptidase activity  | 12/426 | 89/16969  | 2.22E-06 | 0.000124214 | 0.000109701 | 8728/81792/649/2191/9509/140766/4323/5069/170690/11174/81794/8038                                                                          | 12 |
| MF | GO:0003779 | actin binding                  | 25/426 | 361/16969 | 5.02E-06 | 0.000254983 | 0.00022519  | 87/342184/2316/60312/170954/51088/23022/79983/4651/91010/4478/84168/7169/1627/9645/55704/23499/800/2035/54434/22846/23603/7168/56062/11346 | 25 |
| MF | GO:1901681 | sulfur compound binding        | 18/426 | 221/16969 | 1.25E-05 | 0.000580846 | 0.000512978 | 2246/4053/3918/51363/2335/8828/1289/8829/10631/1301/5118/7057/1622/7058/3673/3730/53834/56922                                              | 18 |
| MF | GO:0008201 | heparin binding                | 14/426 | 148/16969 | 2.20E-05 | 0.000899119 | 0.000794062 | 2246/4053/3918/2335/8828/1289/8829/10631/1301/5118/7057/7058/3730/53834                                                                    | 14 |
| MF | GO:0050839 | cell adhesion molecule binding | 27/426 | 444/16969 | 2.25E-05 | 0.000899119 | 0.000794062 | 7045/87/2246/2316/2191/4240/2335/8496/1289/1307/3690/143098/4323/3685/3678/4478/3417/1627/23499/800/1281/11117/1012/11135/7057/3673/10085  | 27 |
| MF | GO:0043394 | proteoglycan binding           | 7/426  | 36/16969  | 2.66E-05 | 0.000991248 | 0.000875427 | 2335/1289/3371/7057/1508/3673/50509                                                                                                        | 7  |
| MF | GO:0008237 | metallopeptidase activity      | 14/426 | 153/16969 | 3.20E-05 | 0.001118597 | 0.000987896 | 8728/81792/649/155185/2191/9509/140766/4323/5069/170690/11174/81794/22846/8038                                                             | 14 |
| MF | GO:0046332 | SMAD binding                   | 9/426  | 72/16969  | 7.64E-05 | 0.002512862 | 0.002219249 | 56937/8091/2316/7041/1290/1281/1278/90993/658                                                                                              | 9  |
| MF | GO:00      | growth                         | 13/426 | 147/16969 | 8.67E-   | 0.002692    | 0.002       | 3624/56034/649/2246/5154/7042/353500/707                                                                                                   | 13 |

|    |            |                                                     |        |           |             |             |             |                                                              |    |
|----|------------|-----------------------------------------------------|--------|-----------|-------------|-------------|-------------|--------------------------------------------------------------|----|
|    | 08083      | factor activity                                     |        | 9         | 05          | 254         | 37768       | 6/23529/3976/5155/6320/1435                                  |    |
| MF | GO:0004065 | arylsulfatase activity                              | 4/426  | 12/16969  | 0.000165197 | 0.004860258 | 0.004292366 | 79642/55959/340075/23213                                     | 4  |
| MF | GO:0019955 | cytokine binding                                    | 10/426 | 100/16969 | 0.000206781 | 0.005779541 | 0.005104236 | 135228/8828/7837/3690/3685/8829/9244/4054/7057/133396        | 10 |
| MF | GO:0001540 | amyloid-beta binding                                | 8/426  | 71/16969  | 0.000394142 | 0.01049169  | 0.009265799 | 323/7042/2892/2048/3684/7097/3673/3339                       | 8  |
| MF | GO:0008484 | sulfuric ester hydrolase activity                   | 4/426  | 15/16969  | 0.000429075 | 0.010902412 | 0.009628531 | 79642/55959/340075/23213                                     | 4  |
| MF | GO:0015026 | coreceptor activity                                 | 6/426  | 40/16969  | 0.000449959 | 0.010935964 | 0.009658162 | 3690/3685/8829/2239/10082/4919                               | 6  |
| MF | GO:0002020 | protease binding                                    | 10/426 | 121/16969 | 0.000949081 | 0.022105685 | 0.019522768 | 2191/2335/3690/3685/1277/2152/1281/1278/5265/1893            | 10 |
| MF | GO:0017048 | Rho GTPase binding                                  | 11/426 | 146/16969 | 0.001155961 | 0.025847293 | 0.022827192 | 26230/2316/9732/9639/91010/7204/64857/55785/23603/4688/55701 | 11 |
| MF | GO:0050431 | transforming growth factor beta binding             | 4/426  | 21/16969  | 0.00166984  | 0.035901561 | 0.03170668  | 135228/3685/4054/7057                                        | 4  |
| MF | GO:0005172 | vascular endothelial growth factor receptor binding | 3/426  | 11/16969  | 0.002230796 | 0.046185735 | 0.04078921  | 3690/3678/7424                                               | 3  |
| MF | GO:0004867 | serine-type endopeptidase inhibitor                 | 7/426  | 73/16969  | 0.002343002 | 0.046776365 | 0.041310828 | 135228/1294/1293/6695/3730/5265/12                           | 7  |

---

|    |            |                             |       |          |             |             |             |                                    |   |
|----|------------|-----------------------------|-------|----------|-------------|-------------|-------------|------------------------------------|---|
|    |            | activity                    |       |          |             |             |             |                                    |   |
| MF | GO:0001618 | virus receptor activity     | 7/426 | 74/16969 | 0.002533147 | 0.047200978 | 0.041685827 | 558/3693/3690/3685/23601/3678/3673 | 7 |
| MF | GO:0104005 | hijacked molecular function | 7/426 | 74/16969 | 0.002533147 | 0.047200978 | 0.041685827 | 558/3693/3690/3685/23601/3678/3673 | 7 |

**eTable 5.** Kyoto Encyclopedia of Genes and Genomes Pathway Enrichment Analysis of Immune-Active Class in IMvigor210 Trial

| ID       | Description                             | Gene ratio | Bg ratio | P value     | P adjust    | Q value     | Gene ID                                                          | Count |
|----------|-----------------------------------------|------------|----------|-------------|-------------|-------------|------------------------------------------------------------------|-------|
| hsa05322 | Systemic lupus erythematosus            | 13/33      | 133/7916 | 2.02E-15    | 1.13E-13    | 7.02E-14    | 3012/8329/8331/8332/8339/8345/8340/8342/8968/8355/8357/8354/8368 | 13    |
| hsa05034 | Alcoholism                              | 13/33      | 184/7916 | 1.45E-13    | 4.05E-12    | 2.51E-12    | 3012/8329/8331/8332/8339/8345/8340/8342/8968/8355/8357/8354/8368 | 13    |
| hsa05203 | Viral carcinogenesis                    | 8/33       | 201/7916 | 1.21E-06    | 2.26E-05    | 1.40E-05    | 898/991/1029/8339/8345/8340/8342/8368                            | 8     |
| hsa04110 | Cell cycle                              | 5/33       | 124/7916 | 0.000145275 | 0.002033854 | 0.001261601 | 898/991/1029/1869/27127                                          | 5     |
| hsa04218 | Cellular senescence                     | 5/33       | 160/7916 | 0.000475816 | 0.005329135 | 0.003305666 | 898/1029/1869/2305/4605                                          | 5     |
| hsa02010 | ABC transporters                        | 3/33       | 45/7916  | 0.000831408 | 0.007759806 | 0.004813414 | 10349/23460/10350                                                | 3     |
| hsa05166 | Human T-cell leukemia virus 1 infection | 5/33       | 219/7916 | 0.001952437 | 0.015619499 | 0.009688787 | 898/991/1029/1869/7015                                           | 5     |



---

|              |                                                       |      |              |                 |                 |                 |                     |   |
|--------------|-------------------------------------------------------|------|--------------|-----------------|-----------------|-----------------|---------------------|---|
| hsa041<br>15 | p53<br>signaling<br>pathway                           | 3/33 | 72/791<br>6  | 0.003237<br>083 | 0.022659<br>583 | 0.014055<br>756 | 898/1029/6241       | 3 |
| hsa042<br>17 | Necroptosis                                           | 4/33 | 162/79<br>16 | 0.004354<br>863 | 0.027096<br>926 | 0.016808<br>244 | 3012/8329/8331/8332 | 4 |
| hsa052<br>02 | Transcriptio<br>nal<br>misregulati<br>on in<br>cancer | 4/33 | 186/79<br>16 | 0.007089<br>377 | 0.039700<br>511 | 0.024626<br>257 | 8968/8355/8357/8354 | 4 |

**eTable 6.** Kyoto Encyclopedia of Genes and Genomes Pathway Enrichment Analysis of Immune-Exclusion Class in IMvigor210 Trial

| ID       | Description                                  | GeneRatio | BgRatio | P value  | P adjust | qvalue   | geneID                                                                                 | Count |
|----------|----------------------------------------------|-----------|---------|----------|----------|----------|----------------------------------------------------------------------------------------|-------|
| hsa00140 | Steroid hormone biosynthesis                 | 15/219    | 60/7916 | 4.66E-11 | 1.20E-08 | 1.14E-08 | 1646/8644/1551/3294/412/6783/54658/54575/54659/54657/54579/54578/54577/54600/7364      | 15    |
| hsa05204 | Chemical carcinogenesis                      | 16/219    | 82/7916 | 5.65E-10 | 6.49E-08 | 6.17E-08 | 1646/222/1551/2947/2948/4257/6822/54658/54575/54659/54657/54579/54578/54577/54600/7364 | 16    |
| hsa00982 | Drug metabolism - cytochrome P450            | 15/219    | 72/7916 | 7.55E-10 | 6.49E-08 | 6.17E-08 | 222/2330/2947/2948/4128/4257/54658/54575/54659/54657/54579/54578/54577/54600/7364      | 15    |
| hsa00980 | Metabolism of xenobiotics by cytochrome P450 | 14/219    | 76/7916 | 1.53E-08 | 9.87E-07 | 9.39E-07 | 222/2947/2948/4257/6822/54658/54575/54659/54657/54579/54578/54577/54600/7364           | 14    |
| hsa00053 | Ascorbate and aldarate metabolism            | 9/219     | 27/7916 | 2.45E-08 | 1.14E-06 | 1.08E-06 | 54658/54575/54659/54657/54579/54578/54577/54600/7364                                   | 9     |
| hsa00830 | Retinol metabolism                           | 13/219    | 67/7916 | 2.64E-08 | 1.14E-06 | 1.08E-06 | 53630/1551/9249/195814/54658/54575/54659/54657/54579/54578/54577/54600/7364            | 13    |
| hsa00040 | Pentose and glucuronate interconversions     | 9/219     | 34/7916 | 2.32E-07 | 8.53E-06 | 8.11E-06 | 54658/54575/54659/54657/54579/54578/54577/54600/7364                                   | 9     |
| hsa00983 | Drug metabolism - other enzymes              | 12/219    | 79/7916 | 1.49E-06 | 4.65E-05 | 4.42E-05 | 2947/2948/4257/54658/54575/54659/54657/54579/54578/54577/54600/7364                    | 12    |
| hsa00860 | Porphyrin and chlorophyll                    | 9/219     | 42/7916 | 1.62E-06 | 4.65E-05 | 4.42E-05 | 54658/54575/54659/54657/54579/54578/54577/54600/7364                                   | 9     |

---

|          |                                                             |       |         |             |             |             |                                              |   |
|----------|-------------------------------------------------------------|-------|---------|-------------|-------------|-------------|----------------------------------------------|---|
|          | metabolism                                                  |       |         |             |             |             |                                              |   |
| hsa00590 | Arachidonic acid metabolism                                 | 8/219 | 63/7916 | 0.000315458 | 0.00813881  | 0.007737017 | 8644/240/4051/11283/2877/64600/255189/151056 | 8 |
| hsa00601 | Glycosphingo lipid biosynthesis - lacto and neolacto series | 5/219 | 27/7916 | 0.000759957 | 0.017743034 | 0.016867103 | 10331/2525/2528/10690/6484                   | 5 |
| hsa00480 | Glutathione metabolism                                      | 7/219 | 56/7916 | 0.000825257 | 0.017743034 | 0.016867103 | 124975/2877/2947/2948/3417/4257/4953         | 7 |

**eTable 7.** Kyoto Encyclopedia of Genes and Genomes Pathway Enrichment Analysis of Immune-Dysfunctional Class in IMvigor210 Trial

| ID       | Description                     | Gene Ratio | Bg Ratio | P value  | P adjust | qvalue   | geneID                                                                                                                                                                                                                                                       | Count |
|----------|---------------------------------|------------|----------|----------|----------|----------|--------------------------------------------------------------------------------------------------------------------------------------------------------------------------------------------------------------------------------------------------------------|-------|
| hsa04640 | Hematopoietic cell lineage      | 44/540     | 98/7916  | 4.49E-26 | 1.25E-23 | 9.88E-24 | 290/929/930/911/914/933/948/951/952/915/916/917/960/921/925/1378/1380/1436/1438/1441/2208/2209/2322/2811/3108/3109/3112/3113/3115/3118/3119/3122/3123/3125/3553/7850/3559/3569/3575/3675/3676/3684/102723407/931                                             | 44    |
| hsa04145 | Phagosome                       | 48/540     | 15/27916 | 1.97E-20 | 2.54E-18 | 2.00E-18 | 718/929/30835/948/10332/64581/11151/1514/1536/2204/2209/2212/2213/9103/2214/2215/3105/3106/3107/3108/3109/3112/3113/3115/3118/3119/3122/3123/3125/3134/3684/3689/102723407/8685/4360/4481/653361/4688/4689/4973/6890/6891/7097/10333/7280/347733/10381/84617 | 48    |
| hsa05150 | Staphylococcus aureus infection | 38/540     | 96/7916  | 2.73E-20 | 2.54E-18 | 2.00E-18 | 712/713/714/717/718/719/720/721/728/629/3426/2204/2209/2212/2213/9103/2214/2215/2357/2358/2359/3108/3109/3112/3113/3115/3118/3119/3122/3123/3125/3383/3683/3684/3689/102723407/6403/6404                                                                     | 38    |
| hsa05323 | Rheumatoid arthritis            | 37/540     | 93/7916  | 7.09E-20 | 4.95E-18 | 3.90E-18 | 54/6347/6364/6348/6349/6352/940/941/942/1493/1514/2919/2920/6374/3576/3108/3109/3112/3113/3115/3118/3119/3122/3123/3125/3383/3553/3569/3683/3689/3725/102723407/4050/7097/8600/10673/7422                                                                    | 37    |
| hsa04514 | Cell adhesion molecules (CAMs)  | 44/540     | 14/7916  | 8.32E-18 | 4.64E-16 | 3.66E-16 | 57863/914/933/29126/940/923/941/942/925/999/1493/3105/3106/3107/3108/3109/3112/3113/3115/3118/3119/3122/3123/3125/3134/3383/29851/3676/3680/3683/3684/3689/3696/3897/5818/4897/80380/5788/6401/6402/6403/6404/6614/7412                                      | 44    |
| hsa05140 | Leishmaniasis                   | 30/540     | 76/7916  | 3.18E-16 | 1.48E-14 | 1.17E-14 | 718/1378/1536/1917/2209/2212/9103/2214/2215/3108/3109/3112/3113/3115/3118/3119/3122/3123/3125/3553/3676/3684/3689/3725/102723407/653361/4688/4689/5579/7097                                                                                                  | 30    |

|                      |                                                               |                |                      |              |              |              |                                                                                                                                                                                                                                                                                                                 |        |
|----------------------|---------------------------------------------------------------|----------------|----------------------|--------------|--------------|--------------|-----------------------------------------------------------------------------------------------------------------------------------------------------------------------------------------------------------------------------------------------------------------------------------------------------------------|--------|
| hs<br>a0<br>53<br>32 | Graft-versus-host disease                                     | 22<br>/5<br>40 | 41<br>/7<br>91<br>6  | 1.06<br>E-15 | 4.21E-<br>14 | 3.32E-1<br>4 | 940/941/942/355/3002/3105/3106/3107/3108/3109/3112/3113/3115/3118/3119/3122/3123/3125/3134/3553/3569/5551                                                                                                                                                                                                       | 2<br>2 |
| hs<br>a0<br>53<br>30 | Allograft rejection                                           | 21<br>/5<br>40 | 38<br>/7<br>91<br>6  | 2.15<br>E-15 | 7.51E-<br>14 | 5.92E-1<br>4 | 940/941/942/355/3002/3105/3106/3107/3108/3109/3112/3113/3115/3118/3119/3122/3123/3125/3134/102723407/5551                                                                                                                                                                                                       | 2<br>1 |
| hs<br>a0<br>40<br>60 | Cytokine-cytokine receptor interaction                        | 59<br>/5<br>40 | 29<br>/4<br>79<br>16 | 1.68<br>E-14 | 5.20E-<br>13 | 4.10E-1<br>3 | 655/6357/6362/6363/6347/6364/6366/6348/6349/6351/9560/6352/729230/1233/1236/939/1436/1438/1439/1441/2919/3627/6373/10563/2920/6374/3576/4283/3577/7852/10663/355/3587/3594/3595/3603/3553/7850/3556/9173/53832/50615/11009/3559/3560/3561/133396/9235/90865/3569/3575/3977/4050/4804/9180/4982/23495/8600/10673 | 5<br>9 |
| hs<br>a0<br>54<br>16 | Viral myocarditis                                             | 25<br>/5<br>40 | 60<br>/7<br>91<br>6  | 2.23<br>E-14 | 6.23E-<br>13 | 4.91E-1<br>3 | 940/941/942/1525/3105/3106/3107/3108/3109/3112/3113/3115/3118/3119/3122/3123/3125/3134/3383/3683/3689/284217/102723407/5551/5880                                                                                                                                                                                | 2<br>5 |
| hs<br>a0<br>40<br>61 | Viral protein interaction with cytokine and cytokine receptor | 32<br>/5<br>40 | 10<br>/0<br>79<br>16 | 3.56<br>E-14 | 9.02E-<br>13 | 7.11E-1<br>3 | 6357/6362/6363/6347/6364/6366/6348/6349/6351/9560/6352/729230/1233/1236/1436/2919/3627/6373/10563/2920/6374/3576/4283/3577/7852/3587/53832/11009/3559/3560/3561/3569                                                                                                                                            | 3<br>2 |
| hs<br>a0<br>49<br>40 | Type I diabetes mellitus                                      | 21<br>/5<br>40 | 43<br>/7<br>91<br>6  | 5.69<br>E-14 | 1.32E-<br>12 | 1.04E-1<br>2 | 940/941/942/355/3002/3105/3106/3107/3108/3109/3112/3113/3115/3118/3119/3122/3123/3125/3134/3553/5551                                                                                                                                                                                                            | 2<br>1 |
| hs<br>a0<br>53<br>20 | Autoimmune thyroid disease                                    | 23<br>/5<br>40 | 53<br>/7<br>91<br>6  | 8.65<br>E-14 | 1.86E-<br>12 | 1.46E-1<br>2 | 940/941/942/1493/355/3002/3105/3106/3107/3108/3109/3112/3113/3115/3118/3119/3122/3123/3125/3134/102723407/5551/7253                                                                                                                                                                                             | 2<br>3 |
| hs<br>a0<br>40<br>62 | Chemokine signaling pathway                                   | 44<br>/5<br>40 | 18<br>/9<br>79<br>16 | 2.03<br>E-13 | 4.05E-<br>12 | 3.19E-1<br>2 | 107/113/10000/6357/6362/6363/6347/6364/6366/6348/6349/6351/9560/6352/729230/1233/1236/2919/3627/6373/10563/2920/6374/3576/4283/3577/7852/10663/1794/9844/59345/3055/3702/3718/653361/5293/5294/23533/5330/5579/5880/10235/7409/7454                                                                             | 4<br>4 |
| hs<br>a0             | Primary immunodeficiency                                      | 19<br>/5       | 38<br>/7             | 5.35<br>E-13 | 9.96E-<br>12 | 7.85E-1<br>2 | 100/695/930/915/916/973/925/4261/29851/3561/3575/3718/3932/102723407/5788/6890/6891/23495/7535                                                                                                                                                                                                                  | 1<br>9 |

|                      |                                              |                |                       |              |              |              |                                                                                                                                                                                                                  |        |
|----------------------|----------------------------------------------|----------------|-----------------------|--------------|--------------|--------------|------------------------------------------------------------------------------------------------------------------------------------------------------------------------------------------------------------------|--------|
| 53<br>40             | y                                            | 40             | 91<br>6               |              |              |              |                                                                                                                                                                                                                  |        |
| hs<br>a0<br>51<br>52 | Tuberculosis                                 | 40<br>/5<br>40 | 17<br>9/<br>79<br>16  | 1.06<br>E-11 | 1.86E-<br>10 | 1.46E-1<br>0 | 10000/718/929/30835/972/4261/10332/64581/11151/1378/2207/2209/2212/2213/9103/2214/2215/3108/3109/3112/3113/3115/3118/3119/3122/3123/3125/3587/3553/3569/3684/3687/3689/102723407/4046/4360/64127/7096/7097/10333 | 4<br>0 |
| hs<br>a0<br>43<br>80 | Osteoclast differentiation                   | 33<br>/5<br>40 | 12<br>8/<br>79<br>16  | 1.20<br>E-11 | 1.98E-<br>10 | 1.56E-1<br>0 | 54/10000/695/1436/2209/2212/2213/9103/2214/2215/3553/3725/3932/3937/353514/79168/10859/10288/11006/10990/653361/4688/4689/5293/140885/10326/55423/9021/6688/4982/8600/54209/7305                                 | 3<br>3 |
| hs<br>a0<br>46<br>72 | Intestinal immune network for IgA production | 20<br>/5<br>40 | 49<br>/7<br>91<br>6   | 1.48<br>E-11 | 2.29E-<br>10 | 1.81E-1<br>0 | 940/941/942/7852/3108/3109/3112/3113/3115/3118/3119/3122/3123/3125/29851/3569/3676/102723407/23495/10673                                                                                                         | 2<br>0 |
| hs<br>a0<br>46<br>12 | Antigen processing and presentation          | 24<br>/5<br>40 | 78<br>/7<br>91<br>6   | 1.52<br>E-10 | 2.23E-<br>09 | 1.76E-0<br>9 | 972/925/4261/1514/3105/3106/3107/3108/3109/3112/3113/3115/3118/3119/3122/3123/3125/3134/3304/10437/3822/8302/6890/6891                                                                                           | 2<br>4 |
| hs<br>a0<br>46<br>58 | Th1 and Th2 cell differentiation             | 26<br>/5<br>40 | 92<br>/7<br>91<br>6   | 2.13<br>E-10 | 2.97E-<br>09 | 2.34E-0<br>9 | 919/915/916/917/3108/3109/3112/3113/3115/3118/3119/3122/3123/3125/3594/3595/3559/3560/3561/3718/3725/3932/4094/5588/6775/7535                                                                                    | 2<br>6 |
| hs<br>a0<br>46<br>59 | Th17 cell differentiation                    | 28<br>/5<br>40 | 10<br>/7<br>79<br>16  | 3.09<br>E-10 | 4.10E-<br>09 | 3.24E-0<br>9 | 919/915/916/917/3108/3109/3112/3113/3115/3118/3119/3122/3123/3125/3594/3553/3556/50615/3559/3560/3561/3569/3662/3718/3725/3932/5588/7535                                                                         | 2<br>8 |
| hs<br>a0<br>51<br>69 | Epstein-Barr virus infection                 | 40<br>/5<br>40 | 20<br>/1/<br>79<br>16 | 4.62<br>E-10 | 5.86E-<br>09 | 4.62E-0<br>9 | 10000/695/894/930/919/915/916/917/960/1021/1380/3627/355/2208/3105/3106/3107/3108/3109/3112/3113/3115/3118/3119/3122/3123/3125/3134/3383/3569/3683/3718/3725/102723407/4939/5293/6890/6891/7097/7128             | 4<br>0 |
| hs<br>a0<br>53<br>21 | Inflammatory bowel disease (IBD)             | 21<br>/5<br>40 | 65<br>/7<br>91<br>6   | 7.91<br>E-10 | 9.59E-<br>09 | 7.56E-0<br>9 | 3108/3109/3112/3113/3115/3118/3119/3122/3123/3125/3594/3595/3553/50615/3561/3569/3725/4094/64127/6775/7097                                                                                                       | 2<br>1 |
| hs                   | Complement                                   | 23             | 79                    | 1.25         | 1.46E-       | 1.15E-0      | 712/713/714/717/718/719/720/721/728/730/629/3426/1378/1380/2152/3684/3                                                                                                                                           | 2      |

|                      |                                                     |                |                      |              |              |              |                                                                                                                                                                                                    |        |
|----------------------|-----------------------------------------------------|----------------|----------------------|--------------|--------------|--------------|----------------------------------------------------------------------------------------------------------------------------------------------------------------------------------------------------|--------|
| a0<br>46<br>10       | and coagulation<br>cascades                         | /5<br>40       | /7<br>91<br>6        | E-09         | 08           | 8            | 687/3689/5329/5265/710/7035/11326                                                                                                                                                                  | 3      |
| hs<br>a0<br>53<br>22 | Systemic lupus<br>erythematosus                     | 30<br>/5<br>40 | 13<br>3/<br>79<br>16 | 3.47<br>E-09 | 3.87E-<br>08 | 3.05E-0<br>8 | 712/713/714/717/718/720/721/730/940/941/942/2209/2212/2214/2215/2903/2904/8356/8361/3108/3109/3112/3113/3115/3118/3119/3122/3123/3125/102723407                                                    | 3<br>0 |
| hs<br>a0<br>51<br>66 | Human T-cell<br>leukemia virus 1<br>infection       | 40<br>/5<br>40 | 21<br>9/<br>79<br>16 | 6.42<br>E-09 | 6.89E-<br>08 | 5.43E-0<br>8 | 107/113/10000/894/915/916/917/9586/1958/1959/3105/3106/3107/3108/3109/3112/3113/3115/3118/3119/3122/3123/3125/3134/3383/7850/3559/3560/3561/3569/3683/3689/3718/3725/3932/4316/5293/6513/6688/7538 | 4<br>0 |
| hs<br>a0<br>40<br>64 | NF-kappa B<br>signaling<br>pathway                  | 25<br>/5<br>40 | 10<br>2/<br>79<br>16 | 1.21<br>E-08 | 1.25E-<br>07 | 9.82E-0<br>8 | 597/330/695/6357/6363/6366/6351/9560/929/2919/2920/3576/3383/3553/3932/102723407/4050/23643/5579/5588/7128/8600/10673/7412/7535                                                                    | 2<br>5 |
| hs<br>a0<br>46<br>62 | B cell receptor<br>signaling<br>pathway             | 22<br>/5<br>40 | 82<br>/7<br>91<br>6  | 1.54<br>E-08 | 1.54E-<br>07 | 1.21E-0<br>7 | 10000/695/930/933/973/974/1380/2213/8519/3725/353514/79168/10859/10288/11006/10990/102723407/118788/5293/5579/5880/7409                                                                            | 2<br>2 |
| hs<br>a0<br>51<br>46 | Amoebiasis                                          | 24<br>/5<br>40 | 10<br>2/<br>79<br>16 | 5.54<br>E-08 | 5.33E-<br>07 | 4.20E-0<br>7 | 107/384/929/911/1285/1286/2919/2920/3576/3553/7850/3569/3684/3689/284217/3909/3914/102723407/4583/5293/5330/5579/5272/7097                                                                         | 2<br>4 |
| hs<br>a0<br>51<br>44 | Malaria                                             | 16<br>/5<br>40 | 49<br>/7<br>91<br>6  | 7.15<br>E-08 | 6.65E-<br>07 | 5.24E-0<br>7 | 2532/6347/948/1378/3576/2995/3383/3553/3569/3683/3689/3820/6401/6403/7097/7412                                                                                                                     | 1<br>6 |
| hs<br>a0<br>46<br>20 | Toll-like receptor<br>signaling<br>pathway          | 24<br>/5<br>40 | 10<br>4/<br>79<br>16 | 8.25<br>E-08 | 7.43E-<br>07 | 5.86E-0<br>7 | 10000/6348/6349/6351/9560/6352/929/941/942/3627/6373/3576/4283/3553/3569/3725/23643/5293/6696/7096/7097/10333/51284/51311                                                                          | 2<br>4 |
| hs<br>a0<br>51<br>42 | Chagas disease<br>(American<br>trypanosomiasis<br>) | 23<br>/5<br>40 | 10<br>2/<br>79<br>16 | 2.41<br>E-07 | 2.10E-<br>06 | 1.66E-0<br>6 | 107/10000/712/713/714/718/6347/6348/6349/6352/919/915/916/917/3576/3553/3559/3725/5293/5330/7097/10333                                                                                             | 2<br>3 |
| hs                   | Asthma                                              | 12             | 31                   | 3.83         | 3.23E-       | 2.55E-0      | 2207/3108/3109/3112/3113/3115/3118/3119/3122/3123/3125/102723407                                                                                                                                   | 1      |

|                      |                                                      |                |                      |              |                     |                 |                                                                                                                                                            |        |
|----------------------|------------------------------------------------------|----------------|----------------------|--------------|---------------------|-----------------|------------------------------------------------------------------------------------------------------------------------------------------------------------|--------|
| a0<br>53<br>10       |                                                      | /5<br>40       | /7<br>91<br>6        | E-07         | 06                  | 6               |                                                                                                                                                            | 2      |
| hs<br>a0<br>51<br>62 | Measles                                              | 27<br>/5<br>40 | 13<br>8/<br>79<br>16 | 4.77<br>E-07 | 3.92E-<br>06        | 3.09E-0<br>6    | 10000/894/30835/940/915/916/917/1021/10332/355/2213/3304/3553/3559/3560/3561/3569/3718/3725/4478/4599/4939/5293/6504/7097/51284/7128                       | 2<br>7 |
| hs<br>a0<br>51<br>33 | Pertussis                                            | 19<br>/5<br>40 | 76<br>/7<br>91<br>6  | 4.98<br>E-07 | 3.97E-<br>06        | 3.13E-0<br>6    | 712/713/714/717/718/720/721/929/6374/3576/3553/3569/3394/3684/3689/3725/23643/114548/710                                                                   | 1<br>9 |
| hs<br>a0<br>51<br>64 | Influenza A                                          | 30<br>/5<br>40 | 17<br>0/<br>79<br>16 | 1.13<br>E-06 | 8.75E-<br>06        | 6.90E-0<br>6    | 10000/6347/6352/1021/4261/3627/3576/355/3108/3109/3112/3113/3115/3118/3119/3122/3123/3125/3383/3553/90865/3569/4599/114548/4939/5293/5579/91543/9021/51284 | 3<br>0 |
| hs<br>a0<br>46<br>68 | TNF signaling pathway                                | 23<br>/5<br>40 | 11<br>2/<br>79<br>16 | 1.41<br>E-06 | 1.06E-<br>05        | 8.37E-0<br>6    | 10000/330/6347/6364/6352/9586/2919/3627/2920/6374/1906/355/3383/3553/3569/3725/4318/64127/5293/6401/9021/7128/7412                                         | 2<br>3 |
| hs<br>a0<br>46<br>50 | Natural killer cell mediated cytotoxicity            | 25<br>/5<br>40 | 13<br>1/<br>79<br>16 | 2.06<br>E-06 | 1.51E-<br>05        | 1.19E-0<br>5    | 919/962/355/2207/2214/2215/3002/3105/3106/3107/3383/3683/3689/3822/3932/3937/102723407/5293/5551/5579/5880/4068/7305/7409/7535                             | 2<br>5 |
| hs<br>a0<br>51<br>45 | Toxoplasmosis                                        | 22<br>/5<br>40 | 11<br>2/<br>79<br>16 | 5.16<br>E-06 | 3.69E-<br>05        | 2.91E-0<br>5    | 10000/330/4261/3108/3109/3112/3113/3115/3118/3119/3122/3123/3125/3304/3587/284217/3909/3914/23643/5294/23533/7097                                          | 2<br>2 |
| hs<br>a0<br>49<br>33 | AGE-RAGE signaling pathway in diabetic complications | 20<br>/5<br>40 | 10<br>0/<br>79<br>16 | 1.04<br>E-05 | 7.27E-<br>05        | 5.73E-0<br>5    | 10000/6347/1285/1286/3576/1536/1906/1958/2152/3383/3553/3569/3725/5293/5330/113026/5579/6401/7412/7422                                                     | 2<br>0 |
| hs<br>a0<br>46<br>60 | T cell receptor signaling pathway                    | 20<br>/5<br>40 | 10<br>4/<br>79<br>16 | 1.92<br>E-05 | 0.000<br>13057<br>8 | 0.00010<br>2965 | 10000/919/940/915/916/917/925/1493/29851/3702/3725/3932/3937/5063/5293/5588/5788/10125/7409/7535                                                           | 2<br>0 |



|                      |                                               |                |                      |                         |                     |                 |                                                                                                                                                                                                                                                          |        |
|----------------------|-----------------------------------------------|----------------|----------------------|-------------------------|---------------------|-----------------|----------------------------------------------------------------------------------------------------------------------------------------------------------------------------------------------------------------------------------------------------------|--------|
| hs<br>a0<br>52<br>02 | Transcriptional<br>misregulation in<br>cancer | 29<br>/5<br>40 | 18<br>6/<br>79<br>16 | 2.10<br>E-05            | 0.000<br>13952<br>2 | 0.00011<br>0018 | 8938/597/330/894/929/942/5218/1436/3576/2118/2209/2322/3002/8356/8091/<br>7850/3560/3569/3684/102723407/4094/4318/4804/8013/26471/5079/860/668<br>8/7102                                                                                                 | 2<br>9 |
| hs<br>a0<br>41<br>51 | PI3K-Akt<br>signaling<br>pathway              | 45<br>/5<br>40 | 35<br>4/<br>79<br>16 | 3.08<br>E-05            | 0.000<br>20008<br>4 | 0.00015<br>7772 | 10000/374/894/930/1021/1285/1286/131873/1297/9586/1436/1441/2069/2261<br>/2322/59345/3481/3559/3560/3561/3569/3575/3675/3676/3680/3691/3696/37<br>18/284217/3909/3914/102723407/23566/4804/3164/9180/118788/5293/5294/<br>23533/5649/6446/6696/7097/7422 | 4<br>5 |
| hs<br>a0<br>46<br>66 | Fc gamma<br>R-mediated<br>phagocytosis        | 18<br>/5<br>40 | 93<br>/7<br>91<br>6  | 4.55<br>E-05            | 0.000<br>28867      | 0.00022<br>7625 | 10000/274/1794/2209/2212/2213/2214/2215/3055/102723407/653361/5293/8<br>395/5579/5788/5880/7409/7454                                                                                                                                                     | 1<br>8 |
| hs<br>a0<br>51<br>35 | Yersinia<br>infection                         | 21<br>/5<br>40 | 12<br>0/<br>79<br>16 | 5.25<br>E-05            | 0.000<br>32529<br>1 | 0.00025<br>6502 | 10000/64283/6347/3576/2533/3553/3569/3676/3725/3932/3937/4210/114548/<br>5293/8395/5880/27330/7409/7454/7456/7535                                                                                                                                        | 2<br>1 |
| hs<br>a0<br>51<br>34 | Legionellosis                                 | 13<br>/5<br>40 | 56<br>/7<br>91<br>6  | 7.43<br>E-05            | 0.000<br>44876<br>9 | 0.00035<br>3868 | 718/929/1378/2919/2920/3576/1917/3304/3553/3569/3684/3689/7097                                                                                                                                                                                           | 1<br>3 |
| hs<br>a0<br>45<br>12 | ECM-receptor<br>interaction                   | 17<br>/5<br>40 | 88<br>/7<br>91<br>6  | 7.56<br>E-05            | 0.000<br>44876<br>9 | 0.00035<br>3868 | 948/960/1285/1286/131873/1297/2811/3675/3676/3680/3691/3696/284217/39<br>09/3914/5649/6696                                                                                                                                                               | 1<br>7 |
| hs<br>a0<br>51<br>43 | African<br>trypanosomiasis                    | 10<br>/5<br>40 | 37<br>/7<br>91<br>6  | 0.00<br>013<br>01       | 0.000<br>75620<br>7 | 0.00059<br>6292 | 355/3383/3620/3553/3569/102723407/5330/5579/6401/7412                                                                                                                                                                                                    | 1<br>0 |
| hs<br>a0<br>46<br>70 | Leukocyte<br>transendothelial<br>migration    | 19<br>/5<br>40 | 11<br>2/<br>79<br>16 | 0.00<br>018<br>103<br>3 | 0.001<br>03077<br>9 | 0.00081<br>2801 | 7852/1536/3383/3676/3683/3684/3689/3702/4318/4478/653361/4688/4689/52<br>93/5579/5880/7294/7409/7412                                                                                                                                                     | 1<br>9 |
| hs<br>a0<br>46<br>30 | JAK-STAT<br>signaling<br>pathway              | 23<br>/5<br>40 | 16<br>2/<br>79<br>16 | 0.00<br>059<br>850<br>7 | 0.003<br>33966<br>6 | 0.00263<br>3429 | 10000/316/894/1438/1439/1441/3587/3594/3595/53832/50615/11009/3559/35<br>60/3561/3569/3575/3718/3977/9180/5293/9021/6775                                                                                                                                 | 2<br>3 |

|                      |                                                                    |                |                      |                         |                     |                 |                                                                                                                                                         |        |
|----------------------|--------------------------------------------------------------------|----------------|----------------------|-------------------------|---------------------|-----------------|---------------------------------------------------------------------------------------------------------------------------------------------------------|--------|
| hs<br>a0<br>51<br>63 | Human<br>cytomegalovirus<br>infection                              | 29<br>/5<br>40 | 22<br>5/<br>79<br>16 | 0.00<br>063<br>823<br>8 | 0.003<br>49153<br>5 | 0.00275<br>3181 | 107/113/10000/6347/6348/6349/6351/9560/6352/1021/9586/3576/7852/355/5<br>9345/3105/3106/3107/3134/3587/3553/3569/5293/5330/5579/5880/6890/6891<br>/7422 | 2<br>9 |
| hs<br>a0<br>51<br>67 | Kaposi<br>sarcoma-associ<br>ated herpesvirus<br>infection          | 25<br>/5<br>40 | 18<br>6/<br>79<br>16 | 0.00<br>080<br>537<br>8 | 0.004<br>32116<br>5 | 0.00340<br>737  | 10000/718/1233/942/1021/9976/2919/2920/3576/355/59345/3055/3105/3106/<br>3107/3134/3383/3569/3725/5293/5294/23533/1827/7422/7538                        | 2<br>5 |
| hs<br>a0<br>46<br>11 | Platelet<br>activation                                             | 18<br>/5<br>40 | 12<br>4/<br>79<br>16 | 0.00<br>177<br>347<br>5 | 0.009<br>33584<br>2 | 0.00736<br>1596 | 107/113/10000/54518/695/2207/2212/83706/2811/3937/5293/5294/23533/533<br>0/5742/10125/10235/6916                                                        | 1<br>8 |
| hs<br>a0<br>50<br>20 | Prion diseases                                                     | 8/<br>54<br>0  | 35<br>/7<br>91<br>6  | 0.00<br>202<br>325      | 0.010<br>45345<br>7 | 0.00824<br>287  | 712/713/714/730/6352/1958/3553/3569                                                                                                                     | 8      |
| hs<br>a0<br>45<br>10 | Focal adhesion                                                     | 25<br>/5<br>40 | 19<br>9/<br>79<br>16 | 0.00<br>212<br>009<br>4 | 0.010<br>75465<br>7 | 0.00848<br>0375 | 10000/330/894/1285/1286/131873/1297/3675/3676/3680/3691/3696/3725/284<br>217/3909/3914/5063/64098/5293/5579/5880/5649/6696/7409/7422                    | 2<br>5 |
| hs<br>a0<br>52<br>35 | PD-L1<br>expression and<br>PD-1 checkpoint<br>pathway in<br>cancer | 14<br>/5<br>40 | 89<br>/7<br>91<br>6  | 0.00<br>262<br>209<br>6 | 0.013<br>06365<br>6 | 0.01030<br>1091 | 10000/919/29126/940/915/916/917/3725/3932/5293/5588/10125/7097/7535                                                                                     | 1<br>4 |
| hs<br>a0<br>46<br>21 | NOD-like<br>receptor<br>signaling<br>pathway                       | 23<br>/5<br>40 | 18<br>1/<br>79<br>16 | 0.00<br>271<br>256      | 0.013<br>08166<br>2 | 0.01031<br>5289 | 9447/330/6347/6352/2919/2920/3576/1536/2633/115361/115362/3428/3553/3<br>569/3725/4210/22861/114548/64127/4939/5027/5330/7128                           | 2<br>3 |
| hs<br>a0<br>54<br>18 | Fluid shear<br>stress and<br>atherosclerosis                       | 19<br>/5<br>40 | 13<br>9/<br>79<br>16 | 0.00<br>271<br>948<br>5 | 0.013<br>08166<br>2 | 0.01031<br>5289 | 10000/6347/1514/1843/1906/2817/3162/3383/3553/7850/3725/4318/653361/4<br>688/5293/5880/6401/7412/7422                                                   | 1<br>9 |
| hs<br>a0<br>40       | Rap1 signaling<br>pathway                                          | 24<br>/5<br>40 | 21<br>0/<br>79       | 0.00<br>855<br>402      | 0.040<br>45039<br>2 | 0.03189<br>6366 | 107/113/10000/54518/999/1436/2261/2357/2533/2903/2904/3683/3684/3689/<br>3937/23566/4804/5293/5330/5579/5880/10235/7409/7422                            | 2<br>4 |

---

|    |  |  |    |   |  |  |  |  |  |  |
|----|--|--|----|---|--|--|--|--|--|--|
| 15 |  |  | 16 | 6 |  |  |  |  |  |  |
|----|--|--|----|---|--|--|--|--|--|--|

**eTable 8.** Kyoto Encyclopedia of Genes and Genomes Pathway Enrichment Analysis of Immune-Desert Class in IMvigor210 Trial

| ID       | Description                      | Gene Ratio | BgRatio  | P value  | P adjust    | qvalue      | geneID                                                                                                                 | Count |
|----------|----------------------------------|------------|----------|----------|-------------|-------------|------------------------------------------------------------------------------------------------------------------------|-------|
| hsa04512 | ECM-receptor interaction         | 16/183     | 88/7916  | 1.17E-10 | 2.48E-08    | 2.24E-08    | 1277/1278/1291/1292/1293/1311/2335/22801/3678/3690/255743/7057/7058/7060/3371/63923                                    | 16    |
| hsa04510 | Focal adhesion                   | 22/183     | 199/7916 | 8.39E-10 | 8.90E-08    | 8.04E-08    | 857/1277/1278/1291/1292/1293/1311/2316/2335/3082/22801/3678/3690/10398/56034/5156/5159/7057/7058/7060/3371/63923       | 22    |
| hsa04974 | Protein digestion and absorption | 14/183     | 95/7916  | 3.02E-08 | 2.13E-06    | 1.93E-06    | 1300/1301/1303/1306/1277/1278/255631/1281/1289/1290/50509/1291/1292/1293                                               | 14    |
| hsa05205 | Proteoglycans in cancer          | 19/183     | 204/7916 | 2.07E-07 | 1.10E-05    | 9.92E-06    | 857/1277/1278/1634/2260/2316/2335/3082/3678/3690/4060/4313/5328/6383/7042/7057/7078/7291/7472                          | 19    |
| hsa04151 | PI3K-Akt signaling pathway       | 23/183     | 354/7916 | 6.28E-06 | 0.000266071 | 0.000240442 | 1277/1278/1291/1292/1293/1311/90993/2260/2335/2690/3082/22801/3678/3690/4915/56034/5156/5159/7057/7058/7060/3371/63923 | 23    |
| hsa05144 | Malaria                          | 8/183      | 49/7916  | 1.40E-05 | 0.00049589  | 0.000448123 | 1311/3082/6383/7042/7043/7057/7058/7060                                                                                | 8     |
| hsa05165 | Human papillomavirus infection   | 21/183     | 330/7916 | 2.24E-05 | 0.000679143 | 0.000613724 | 8313/1277/1278/1291/1292/1293/1311/90993/2335/22801/3678/3690/5159/5743/83439/7057/7058/7060/3371/63923/7472           | 21    |
| hsa04933 | AGE-RAGE signaling pathway in    | 10/183     | 100/7916 | 9.74E-05 | 0.002581782 | 0.00233309  | 185/1277/1278/1281/2335/4313/50507/5054/7042/7043                                                                      | 10    |

|          |                                                    |        |          |             |             |             |                                                            |    |
|----------|----------------------------------------------------|--------|----------|-------------|-------------|-------------|------------------------------------------------------------|----|
|          | diabetic complications                             |        |          |             |             |             |                                                            |    |
| hsa05410 | Hypertrophic cardiomyopathy (HCM)                  | 9/183  | 90/7916  | 0.000218311 | 0.005142449 | 0.004647099 | 781/22801/3678/3690/6444/7042/7043/7168/7169               | 9  |
| hsa04350 | TGF-beta signaling pathway                         | 9/183  | 94/7916  | 0.000303759 | 0.006439686 | 0.005819379 | 658/1634/2200/2331/26585/3624/7042/7043/7057               | 9  |
| hsa05414 | Dilated cardiomyopathy (DCM)                       | 9/183  | 96/7916  | 0.00035589  | 0.006666458 | 0.006024307 | 781/22801/3678/3690/6444/7042/7043/7168/7169               | 9  |
| hsa05412 | Arrhythmic right ventricular cardiomyopathy (ARVC) | 8/183  | 77/7916  | 0.000377347 | 0.006666458 | 0.006024307 | 88/781/1000/22801/3678/3690/6444/83439                     | 8  |
| hsa04610 | Complement and coagulation cascades                | 8/183  | 79/7916  | 0.00044984  | 0.007335859 | 0.006629228 | 715/716/3075/2162/2151/5328/5627/5054                      | 8  |
| hsa04310 | Wnt signaling                                      | 11/183 | 160/7916 | 0.00116434  | 0.017631442 | 0.01593308  | 8313/2239/85409/144165/4919/4920/5176/6423/6424/83439/7472 | 11 |

|          |                         |        |          |             |             |             |                                                                                   |    |
|----------|-------------------------|--------|----------|-------------|-------------|-------------|-----------------------------------------------------------------------------------|----|
|          | pathway                 |        |          |             |             |             |                                                                                   |    |
| hsa05215 | Prostate cancer         | 8/183  | 97/7916  | 0.001751662 | 0.024756827 | 0.022372108 | 90993/2260/4314/56034/5156/5159/5328/83439                                        | 8  |
| hsa05206 | MicroRNAs in cancer     | 16/183 | 310/7916 | 0.002138318 | 0.028332717 | 0.025603548 | 1545/8660/3678/3690/5156/5159/5328/5743/7042/7057/7078/3371/63923/7168/7431/23414 | 16 |
| hsa04145 | Phagosome               | 10/183 | 152/7916 | 0.002683943 | 0.033470345 | 0.03024629  | 715/81035/1311/3678/3690/9902/7057/7058/7060/7846                                 | 10 |
| hsa04390 | Hippo signaling pathway | 10/183 | 154/7916 | 0.00295181  | 0.034765759 | 0.031416922 | 8313/658/122786/2736/5054/6591/83439/7042/7043/7472                               | 10 |
| hsa04540 | Gap junction            | 7/183  | 88/7916  | 0.00412983  | 0.04608021  | 0.0416415   | 2982/3357/56034/5156/5159/5592/7846                                               | 7  |

**eTable 9. Gene Ontology Pathway Enrichment Analysis of Immune-Active Class in IMvigor210 Trial**

| ONTOLOGY | ID         | Description                                   | Gene Ratio | BgRatio   | P value  | P adjust | qvalue   | geneID                                                 | Count |
|----------|------------|-----------------------------------------------|------------|-----------|----------|----------|----------|--------------------------------------------------------|-------|
| BP       | GO:0031497 | chromatin assembly                            | 11/44      | 153/17913 | 7.39E-14 | 6.30E-11 | 5.00E-11 | 1029/3009/8339/8345/8340/8342/8968/8355/8357/8354/8368 | 11    |
| BP       | GO:0006333 | chromatin assembly or disassembly             | 11/44      | 178/17913 | 3.94E-13 | 1.68E-10 | 1.33E-10 | 1029/3009/8339/8345/8340/8342/8968/8355/8357/8354/8368 | 11    |
| BP       | GO:0006334 | nucleosome assembly                           | 10/44      | 135/17913 | 8.42E-13 | 2.17E-10 | 1.72E-10 | 3009/8339/8345/8340/8342/8968/8355/8357/8354/8368      | 10    |
| BP       | GO:0006323 | DNA packaging                                 | 11/44      | 194/17913 | 1.02E-12 | 2.17E-10 | 1.72E-10 | 1029/3009/8339/8345/8340/8342/8968/8355/8357/8354/8368 | 11    |
| BP       | GO:0034728 | nucleosome organization                       | 10/44      | 165/17913 | 6.33E-12 | 1.08E-09 | 8.57E-10 | 3009/8339/8345/8340/8342/8968/8355/8357/8354/8368      | 10    |
| BP       | GO:0071103 | DNA conformation change                       | 11/44      | 279/17913 | 5.23E-11 | 7.43E-09 | 5.90E-09 | 1029/3009/8339/8345/8340/8342/8968/8355/8357/8354/8368 | 11    |
| BP       | GO:0065004 | protein-DNA complex assembly                  | 10/44      | 210/17913 | 6.94E-11 | 8.45E-09 | 6.71E-09 | 3009/8339/8345/8340/8342/8968/8355/8357/8354/8368      | 10    |
| BP       | GO:0071824 | protein-DNA complex subunit organization      | 10/44      | 240/17913 | 2.57E-10 | 2.74E-08 | 2.18E-08 | 3009/8339/8345/8340/8342/8968/8355/8357/8354/8368      | 10    |
| BP       | GO:0051290 | protein heterotetramerization                 | 6/44       | 53/17913  | 3.24E-09 | 3.08E-07 | 2.44E-07 | 8968/8355/8357/8354/8368/6241                          | 6     |
| BP       | GO:0006335 | DNA replication-dependent nucleosome assembly | 5/44       | 32/17913  | 1.36E-08 | 1.05E-06 | 8.34E-07 | 8968/8355/8357/8354/8368                               | 5     |
| BP       | GO:0034723 | DNA replication-dependent nucleosome          | 5/44       | 32/17913  | 1.36E-08 | 1.05E-06 | 8.34E-07 | 8968/8355/8357/8354/8368                               | 5     |

|    |            |                                                   |      |           |          |          |          |                                               |   |
|----|------------|---------------------------------------------------|------|-----------|----------|----------|----------|-----------------------------------------------|---|
|    |            | organization                                      |      |           |          |          |          |                                               |   |
| BP | GO:0000183 | chromatin silencing at rDNA                       | 5/44 | 39/17913  | 3.83E-08 | 2.72E-06 | 2.16E-06 | 8968/8355/8357/8354/8368                      | 5 |
| BP | GO:0032200 | telomere organization                             | 7/44 | 167/17913 | 1.55E-07 | 1.02E-05 | 8.05E-06 | 898/8968/8355/8357/8354/8368/7015             | 7 |
| BP | GO:0060147 | regulation of posttranscriptional gene silencing  | 6/44 | 117/17913 | 3.93E-07 | 2.24E-05 | 1.78E-05 | 8968/8355/8357/8354/8368/7015                 | 6 |
| BP | GO:0060966 | regulation of gene silencing by RNA               | 6/44 | 117/17913 | 3.93E-07 | 2.24E-05 | 1.78E-05 | 8968/8355/8357/8354/8368/7015                 | 6 |
| BP | GO:0051291 | protein heterooligomerization                     | 6/44 | 128/17913 | 6.69E-07 | 3.56E-05 | 2.83E-05 | 8968/8355/8357/8354/8368/6241                 | 6 |
| BP | GO:1901990 | regulation of mitotic cell cycle phase transition | 9/44 | 428/17913 | 7.88E-07 | 3.92E-05 | 3.11E-05 | 898/991/1029/1869/7015/90381/22974/9319/11065 | 9 |
| BP | GO:0038111 | interleukin-7-mediated signaling pathway          | 4/44 | 30/17913  | 8.28E-07 | 3.92E-05 | 3.11E-05 | 8968/8355/8357/8354                           | 4 |
| BP | GO:0060968 | regulation of gene silencing                      | 6/44 | 139/17913 | 1.09E-06 | 4.87E-05 | 3.87E-05 | 8968/8355/8357/8354/8368/7015                 | 6 |
| BP | GO:0045652 | regulation of megakaryocyte differentiation       | 5/44 | 79/17913  | 1.39E-06 | 5.94E-05 | 4.71E-05 | 8968/8355/8357/8354/8368                      | 5 |
| BP | GO:1901987 | regulation of cell cycle phase                    | 9/44 | 464/17913 | 1.54E-06 | 6.25E-05 | 4.96E-05 | 898/991/1029/1869/7015/90381/22974/9319/11065 | 9 |



|    |            |                                                                               |      |           |          |             |             |                                |   |
|----|------------|-------------------------------------------------------------------------------|------|-----------|----------|-------------|-------------|--------------------------------|---|
|    |            | transition                                                                    |      |           |          |             |             |                                |   |
| BP | GO:0006342 | chromatin silencing                                                           | 5/44 | 83/17913  | 1.78E-06 | 6.91E-05    | 5.48E-05    | 8968/8355/8357/8354/8368       | 5 |
| BP | GO:0098760 | response to interleukin-7                                                     | 4/44 | 41/17913  | 3.00E-06 | 0.000104104 | 8.26E-05    | 8968/8355/8357/8354            | 4 |
| BP | GO:0098761 | cellular response to interleukin-7                                            | 4/44 | 41/17913  | 3.00E-06 | 0.000104104 | 8.26E-05    | 8968/8355/8357/8354            | 4 |
| BP | GO:0051262 | protein tetramerization                                                       | 6/44 | 166/17913 | 3.05E-06 | 0.000104104 | 8.26E-05    | 8968/8355/8357/8354/8368/6241  | 6 |
| BP | GO:0030219 | megakaryocyte differentiation                                                 | 5/44 | 96/17913  | 3.66E-06 | 0.000120179 | 9.54E-05    | 8968/8355/8357/8354/8368       | 5 |
| BP | GO:0045814 | negative regulation of gene expression, epigenetic                            | 5/44 | 101/17913 | 4.70E-06 | 0.000148613 | 0.000117922 | 8968/8355/8357/8354/8368       | 5 |
| BP | GO:0060964 | regulation of gene silencing by miRNA                                         | 5/44 | 113/17913 | 8.16E-06 | 0.000248477 | 0.000197163 | 8968/8355/8357/8354/8368       | 5 |
| BP | GO:000082  | G1/S transition of mitotic cell cycle                                         | 6/44 | 269/17913 | 4.74E-05 | 0.001373878 | 0.00109015  | 898/1029/1869/128239/6241/7015 | 6 |
| BP | GO:000083  | regulation of transcription involved in G1/S transition of mitotic cell cycle | 3/44 | 29/17913  | 4.83E-05 | 0.001373878 | 0.00109015  | 898/1869/6241                  | 3 |
| BP | GO:00      | cell cycle                                                                    | 6/44 | 288/1     | 6.93E-0  | 0.0018      | 0.0014      | 898/1029/1869/128239/6241/7015 | 6 |

|    |            |                                                            |      |           |             |             |             |                                  |   |
|----|------------|------------------------------------------------------------|------|-----------|-------------|-------------|-------------|----------------------------------|---|
|    | 44843      | G1/S phase transition                                      |      | 7913      | 5           | 48996       | 67149       |                                  |   |
| BP | GO:0051225 | spindle assembly                                           | 4/44 | 90/17913  | 6.94E-05    | 0.001848996 | 0.001467149 | 259266/991/4605/22974            | 4 |
| BP | GO:0010948 | negative regulation of cell cycle process                  | 6/44 | 344/17913 | 0.000183135 | 0.004733759 | 0.003756163 | 991/1029/1869/6241/90381/9319    | 6 |
| BP | GO:0000280 | nuclear division                                           | 6/44 | 357/17913 | 0.00022378  | 0.005614243 | 0.004454814 | 259266/991/4605/22974/9319/11065 | 6 |
| BP | GO:0006563 | L-serine metabolic process                                 | 2/44 | 10/17913  | 0.000262053 | 0.006306525 | 0.005004129 | 26227/29968                      | 2 |
| BP | GO:1901991 | negative regulation of mitotic cell cycle phase transition | 5/44 | 235/17913 | 0.000266477 | 0.006306525 | 0.005004129 | 991/1029/1869/90381/9319         | 5 |
| BP | GO:0140014 | mitotic nuclear division                                   | 5/44 | 237/17913 | 0.000277105 | 0.006306525 | 0.005004129 | 991/4605/22974/9319/11065        | 5 |
| BP | GO:0090307 | mitotic spindle assembly                                   | 3/44 | 52/17913  | 0.000280947 | 0.006306525 | 0.005004129 | 991/4605/22974                   | 3 |
| BP | GO:0045637 | regulation of myeloid cell differentiation                 | 5/44 | 250/17913 | 0.000354267 | 0.007748449 | 0.006148273 | 8968/8355/8357/8354/8368         | 5 |
| BP | GO:1901988 | negative regulation of cell cycle phase transition         | 5/44 | 254/17913 | 0.000381001 | 0.007811607 | 0.006198387 | 991/1029/1869/90381/9319         | 5 |
| BP | GO:1904668 | positive regulation of ubiquitin                           | 2/44 | 12/17913  | 0.000383145 | 0.007811607 | 0.006198387 | 991/11065                        | 2 |

|    |            |                                                            |      |           |             |             |             |                                  |   |
|----|------------|------------------------------------------------------------|------|-----------|-------------|-------------|-------------|----------------------------------|---|
|    |            | protein ligase activity                                    |      |           |             |             |             |                                  |   |
| BP | GO:0048285 | organelle fission                                          | 6/44 | 395/17913 | 0.000384628 | 0.007811607 | 0.006198387 | 259266/991/4605/22974/9319/11065 | 6 |
| BP | GO:0090342 | regulation of cell aging                                   | 3/44 | 59/17913  | 0.000408349 | 0.008100505 | 0.006427623 | 1029/2305/7015                   | 3 |
| BP | GO:0007051 | spindle organization                                       | 4/44 | 147/17913 | 0.000457916 | 0.008680051 | 0.006887484 | 259266/991/4605/22974            | 4 |
| BP | GO:0007093 | mitotic cell cycle checkpoint                              | 4/44 | 147/17913 | 0.000457916 | 0.008680051 | 0.006887484 | 991/1869/90381/9319              | 4 |
| BP | GO:0090399 | replicative senescence                                     | 2/44 | 14/17913  | 0.000526628 | 0.009765506 | 0.007748776 | 1029/7015                        | 2 |
| BP | GO:0009070 | serine family amino acid biosynthetic process              | 2/44 | 15/17913  | 0.000606699 | 0.011010941 | 0.008737009 | 26227/29968                      | 2 |
| BP | GO:0045930 | negative regulation of mitotic cell cycle                  | 5/44 | 308/17913 | 0.000912087 | 0.015996534 | 0.012692999 | 991/1029/1869/90381/9319         | 5 |
| BP | GO:2000045 | regulation of G1/S transition of mitotic cell cycle        | 4/44 | 177/17913 | 0.00091891  | 0.015996534 | 0.012692999 | 898/1029/1869/7015               | 4 |
| BP | GO:1901992 | positive regulation of mitotic cell cycle phase transition | 3/44 | 82/17913  | 0.001069508 | 0.018245804 | 0.014477759 | 898/7015/11065                   | 3 |
| BP | GO:0048477 | oogenesis                                                  | 3/44 | 84/17913  | 0.001146786 | 0.019180558 | 0.015219472 | 259266/9319/51087                | 3 |
| BP | GO:1902806 | regulation of cell cycle                                   | 4/44 | 195/17913 | 0.001315211 | 0.021248324 | 0.016860211 | 898/1029/1869/7015               | 4 |

|    |            |                                                               |      |           |             |             |             |                       |   |
|----|------------|---------------------------------------------------------------|------|-----------|-------------|-------------|-------------|-----------------------|---|
|    |            | G1/S phase transition                                         |      |           |             |             |             |                       |   |
| BP | GO:1904666 | regulation of ubiquitin protein ligase activity               | 2/44 | 22/17913  | 0.001320236 | 0.021248324 | 0.016860211 | 991/11065             | 2 |
| BP | GO:000075  | cell cycle checkpoint                                         | 4/44 | 197/17913 | 0.001365574 | 0.021571012 | 0.017116259 | 991/1869/90381/9319   | 4 |
| BP | GO:0051321 | meiotic cell cycle                                            | 4/44 | 203/17913 | 0.001524752 | 0.023647525 | 0.018763939 | 259266/991/27127/9319 | 4 |
| BP | GO:0070199 | establishment of protein localization to chromosome           | 2/44 | 24/17913  | 0.001572512 | 0.02395273  | 0.019006115 | 3009/7015             | 2 |
| BP | GO:0007052 | mitotic spindle organization                                  | 3/44 | 95/17913  | 0.001634887 | 0.024465946 | 0.019413344 | 991/4605/22974        | 3 |
| BP | GO:1901989 | positive regulation of cell cycle phase transition            | 3/44 | 97/17913  | 0.001735552 | 0.025524577 | 0.020253351 | 898/7015/11065        | 3 |
| BP | GO:0051443 | positive regulation of ubiquitin-protein transferase activity | 2/44 | 28/17913  | 0.002140271 | 0.030427522 | 0.024143761 | 991/11065             | 2 |
| BP | GO:0090344 | negative regulation of cell aging                             | 2/44 | 28/17913  | 0.002140271 | 0.030427522 | 0.024143761 | 2305/7015             | 2 |
| BP | GO:0006270 | DNA replication initiation                                    | 2/44 | 30/17913  | 0.002455347 | 0.032221712 | 0.025567423 | 898/90381             | 2 |
| BP | GO:00      | mitotic                                                       | 2/44 | 30/17     | 0.0024      | 0.0322      | 0.0255      | 991/9319              | 2 |

|    |            |                                                              |      |               |                 |                 |                 |                       |   |
|----|------------|--------------------------------------------------------------|------|---------------|-----------------|-----------------|-----------------|-----------------------|---|
|    | 07094      | spindle assembly checkpoint                                  |      | 913           | 55347           | 21712           | 67423           |                       |   |
| BP | GO:0031577 | spindle checkpoint                                           | 2/44 | 30/17<br>913  | 0.0024<br>55347 | 0.0322<br>21712 | 0.0255<br>67423 | 991/9319              | 2 |
| BP | GO:0071173 | spindle assembly checkpoint                                  | 2/44 | 30/17<br>913  | 0.0024<br>55347 | 0.0322<br>21712 | 0.0255<br>67423 | 991/9319              | 2 |
| BP | GO:0071174 | mitotic spindle checkpoint                                   | 2/44 | 30/17<br>913  | 0.0024<br>55347 | 0.0322<br>21712 | 0.0255<br>67423 | 991/9319              | 2 |
| BP | GO:000086  | G2/M transition of mitotic cell cycle                        | 4/44 | 238/1<br>7913 | 0.0027<br>19188 | 0.0350<br>10038 | 0.0277<br>79915 | 2305/9833/90381/22974 | 4 |
| BP | GO:0045841 | negative regulation of mitotic metaphase/anaphase transition | 2/44 | 32/17<br>913  | 0.0027<br>90953 | 0.0350<br>10038 | 0.0277<br>79915 | 991/9319              | 2 |
| BP | GO:2000816 | negative regulation of mitotic sister chromatid separation   | 2/44 | 32/17<br>913  | 0.0027<br>90953 | 0.0350<br>10038 | 0.0277<br>79915 | 991/9319              | 2 |
| BP | GO:0007569 | cell aging                                                   | 3/44 | 116/1<br>7913 | 0.0028<br>88414 | 0.0351<br>43495 | 0.0278<br>85812 | 1029/2305/7015        | 3 |
| BP | GO:1902850 | microtubule cytoskeleton organization involved in mitosis    | 3/44 | 116/1<br>7913 | 0.0028<br>88414 | 0.0351<br>43495 | 0.0278<br>85812 | 991/4605/22974        | 3 |
| BP | GO:1902100 | negative regulation of metaphase/anaphase transition         | 2/44 | 33/17<br>913  | 0.0029<br>66391 | 0.0351<br>43495 | 0.0278<br>85812 | 991/9319              | 2 |

|    |            |                                                             |      |           |             |             |             |                          |   |
|----|------------|-------------------------------------------------------------|------|-----------|-------------|-------------|-------------|--------------------------|---|
|    |            | naphase transition of cell cycle                            |      |           |             |             |             |                          |   |
| BP | GO:1905819 | negative regulation of chromosome separation                | 2/44 | 33/17913  | 0.002966391 | 0.035143495 | 0.027885812 | 991/9319                 | 2 |
| BP | GO:0030099 | myeloid cell differentiation                                | 5/44 | 411/17913 | 0.003229005 | 0.037730702 | 0.02993872  | 8968/8355/8357/8354/8368 | 5 |
| BP | GO:0033048 | negative regulation of mitotic sister chromatid segregation | 2/44 | 35/17913  | 0.003332416 | 0.038412849 | 0.030479992 | 991/9319                 | 2 |
| BP | GO:0060251 | regulation of glial cell proliferation                      | 2/44 | 36/17913  | 0.003522953 | 0.040067716 | 0.031793103 | 1869/7015                | 2 |
| BP | GO:0044839 | cell cycle G2/M phase transition                            | 4/44 | 257/17913 | 0.003581324 | 0.040195649 | 0.031894616 | 2305/9833/90381/22974    | 4 |
| BP | GO:0033046 | negative regulation of sister chromatid segregation         | 2/44 | 37/17913  | 0.003718473 | 0.04066484  | 0.032266912 | 991/9319                 | 2 |
| BP | GO:2000648 | positive regulation of stem cell proliferation              | 2/44 | 37/17913  | 0.003718473 | 0.04066484  | 0.032266912 | 259266/7015              | 2 |
| BP | GO:0051985 | negative regulation of chromosome segregation               | 2/44 | 38/17913  | 0.003918952 | 0.042314763 | 0.0335761   | 991/9319                 | 2 |
| BP | GO:0007292 | female gamete                                               | 3/44 | 132/17913 | 0.00415483  | 0.04430087  | 0.035152045 | 259266/9319/51087        | 3 |

|    |             |                                            |       |           |             |             |             |                                                                                  |    |
|----|-------------|--------------------------------------------|-------|-----------|-------------|-------------|-------------|----------------------------------------------------------------------------------|----|
|    |             | generation                                 |       |           |             |             |             |                                                                                  |    |
| BP | GO:0051445  | regulation of meiotic cell cycle           | 2/44  | 41/17913  | 0.0045499   | 0.046808582 | 0.037141875 | 259266/991                                                                       | 2  |
| BP | GO:0070317  | negative regulation of G0 to G1 transition | 2/44  | 41/17913  | 0.0045499   | 0.046808582 | 0.037141875 | 1869/6241                                                                        | 2  |
| BP | GO:0007059  | chromosome segregation                     | 4/44  | 275/17913 | 0.004554645 | 0.046808582 | 0.037141875 | 991/83540/27127/9319                                                             | 4  |
| BP | GO:0009069  | serine family amino acid metabolic process | 2/44  | 42/17913  | 0.004769972 | 0.048437932 | 0.038434738 | 26227/29968                                                                      | 2  |
| CC | GO:0000786  | nucleosome                                 | 13/44 | 106/18678 | 1.33E-19    | 1.25E-17    | 9.37E-18    | 3009/3012/8329/8332/8339/8345/8340/8342/8968/8355/8357/8354/8368                 | 13 |
| CC | GO:00044815 | DNA packaging complex                      | 13/44 | 113/18678 | 3.17E-19    | 1.49E-17    | 1.12E-17    | 3009/3012/8329/8332/8339/8345/8340/8342/8968/8355/8357/8354/8368                 | 13 |
| CC | GO:00032993 | protein-DNA complex                        | 14/44 | 187/18678 | 5.49E-18    | 1.72E-16    | 1.29E-16    | 3009/3012/8329/8332/8339/8345/8340/8342/8968/8355/8357/8354/8368/7015            | 14 |
| CC | GO:0000785  | chromatin                                  | 16/44 | 500/18678 | 1.15E-14    | 2.69E-13    | 2.02E-13    | 84733/1029/1869/3009/3012/8329/8332/8339/8345/8340/8342/8968/8355/8357/8354/8368 | 16 |
| CC | GO:0000788  | nuclear nucleosome                         | 5/44  | 38/18678  | 2.72E-08    | 5.11E-07    | 3.83E-07    | 8968/8355/8357/8354/8368                                                         | 5  |
| CC | GO:00044454 | nuclear chromosome part                    | 9/44  | 469/18678 | 1.19E-06    | 1.87E-05    | 1.40E-05    | 1869/3009/8968/8355/8357/8354/8368/27127/7015                                    | 9  |
| CC | GO:0000790  | nuclear chromatin                          | 7/44  | 309/18678 | 7.18E-06    | 9.65E-05    | 7.24E-05    | 1869/3009/8968/8355/8357/8354/8368                                               | 7  |
| CC | GO:0000152  | nuclear ubiquitin ligase complex           | 3/44  | 38/18678  | 9.71E-05    | 0.001141309 | 0.000856301 | 84733/991/11065                                                                  | 3  |
| CC | GO:0000792  | heterochromatin                            | 3/44  | 75/18678  | 0.00073166  | 0.007641782 | 0.005733476 | 84733/1029/3009                                                                  | 3  |

---

|    |            |                                     |       |           |             |             |             |                                                             |    |
|----|------------|-------------------------------------|-------|-----------|-------------|-------------|-------------|-------------------------------------------------------------|----|
| CC | GO:0005680 | anaphase-promoting complex          | 2/44  | 21/18678  | 0.001106978 | 0.010405592 | 0.007807107 | 991/11065                                                   | 2  |
| CC | GO:0000922 | spindle pole                        | 3/44  | 152/18678 | 0.005481824 | 0.046844681 | 0.035146625 | 259266/991/22974                                            | 3  |
| MF | GO:0046982 | protein heterodimerization activity | 12/44 | 497/16969 | 3.14E-09    | 2.57E-07    | 2.31E-07    | 3012/8329/8332/8339/8345/8340/8342/8968/8355/8357/8354/8368 | 12 |



**eTable 10.** Gene Ontology Pathway Enrichment Analysis of Immune-Exclusion Class in IMvigor210 Trial

| Ontology | ID         | Description                    | Gene ratio | Bg ratio | P value | P adjust | Q value | Gene ID                                                                                                                                                                                                                           | Count |
|----------|------------|--------------------------------|------------|----------|---------|----------|---------|-----------------------------------------------------------------------------------------------------------------------------------------------------------------------------------------------------------------------------------|-------|
| BP       | GO:0008544 | epidermal development          | 4/68       | 45/13    | 9.99E-3 | 2.17E-9  | 2.02E-9 | 8644/9620/1515/1825/1830/1999/2125/645027/79152/94234/51083/29841/57822/3713/26085/3859/3875/3880/54474/3852/3853/3854/286887/3855/3887/440050/57830/3846/55283/4488/4610/5080/5046/5493/6469/80736/6700/6703/6707/412/7051/79755 | 42    |
| BP       | GO:0070268 | cornification                  | 2/48       | 11/13    | 1.17E-2 | 2.17E-9  | 2.02E-9 | 1825/1830/2125/3713/26085/3859/3875/3880/54474/3852/3853/3854/286887/3855/3887/5046/5493/6700/6703/6707/7051                                                                                                                      | 21    |
| BP       | GO:0042445 | hormone metabolic process      | 2/48       | 21/13    | 2.51E-2 | 3.10E-9  | 2.88E-9 | 1646/8644/53630/650/84649/10202/9249/53905/50506/90527/3169/51083/2625/51301/3294/389434/5046/151056/195814/6469/80736/60482/6783/54658/54659/54577/54600/7364                                                                    | 28    |
| BP       | GO:0009913 | epidermal cell differentiation | 3/48       | 34/13    | 1.50E-0 | 1.40E-7  | 1.30E-7 | 8644/1515/1825/1830/2125/79152/29841/3713/26085/3859/3875/3880/54474/3852/3853/3854/286887/3855/3887/440050/57830/3846/55283/4488/4610/5080/5046/5493/80736/6700/6703/6707/7051                                                   | 33    |
| BP       | GO:0043588 | skin development               | 3/48       | 41/13    | 2.52E-0 | 1.87E-7  | 1.74E-7 | 8644/9620/1364/1515/1825/1830/2125/79152/94234/51083/29841/57822/3713/26085/3859/3875/3880/54474/3852/3853/3854/286887/3855/3887/440050/57830/3846/4488/5080/5046/5493/6469/6700/6703/6707/7051                                   | 36    |
| BP       | GO:003021  | keratinocyte differentiation   | 2/4        | 29/179   | 1.26E-0 | 7.79E-7  | 7.25E-7 | 8644/1515/1825/1830/2125/29841/3713/26085/3859/3875/3880/54474/3852/3853/3854/286887/3855/3887/440050/57830/3846/4488/5080/5046/5493/6700/6703/6707/7051                                                                          | 29    |

|    |                        |                                                                |                        |                       |                  |                  |                  |                                                                                                                                                                                                                         |        |
|----|------------------------|----------------------------------------------------------------|------------------------|-----------------------|------------------|------------------|------------------|-------------------------------------------------------------------------------------------------------------------------------------------------------------------------------------------------------------------------|--------|
|    | 6                      | iation                                                         | 6<br>8                 | 13                    |                  |                  |                  |                                                                                                                                                                                                                         |        |
| BP | GO:<br>190<br>161<br>5 | organic<br>hydroxy<br>compou<br>nd<br>metabol<br>ic<br>process | 3<br>8/<br>4<br>6<br>8 | 50<br>0/1<br>79<br>13 | 4.11<br>E-0<br>9 | 2.18<br>E-0<br>6 | 2.02<br>E-0<br>6 | 18/340485/1646/8644/222/8542/5205/53630/650/1050/1591/66002/4051/84649/9249/<br>1812/53905/50506/90527/2625/51301/3158/8821/389434/3990/4128/114880/255738/<br>151056/5333/51196/23007/9651/195814/11001/6653/6783/6822 | 3<br>8 |
| BP | GO:<br>003<br>142<br>4 | keratiniz<br>ation                                             | 2<br>4/<br>4<br>6<br>8 | 22<br>4/1<br>79<br>13 | 5.22<br>E-0<br>9 | 2.42<br>E-0<br>6 | 2.25<br>E-0<br>6 | 1825/1830/2125/3713/26085/3859/3875/3880/54474/3852/3853/3854/286887/3855/38<br>87/440050/57830/3846/5046/5493/6700/6703/6707/7051                                                                                      | 2<br>4 |
| BP | GO:<br>005<br>269<br>5 | cellular<br>glucuro<br>nidation                                | 8/<br>4<br>6<br>8      | 18/<br>17<br>91<br>3  | 7.11<br>E-0<br>9 | 2.93<br>E-0<br>6 | 2.73<br>E-0<br>6 | 54658/54575/54659/54657/54578/54577/54600/7364                                                                                                                                                                          | 8      |
| BP | GO:<br>003<br>475<br>4 | cellular<br>hormon<br>e<br>metabol<br>ic<br>process            | 1<br>7/<br>4<br>6<br>8 | 11<br>7/1<br>79<br>13 | 9.98<br>E-0<br>9 | 3.70<br>E-0<br>6 | 3.44<br>E-0<br>6 | 1646/8644/53630/650/84649/10202/9249/3294/151056/195814/6469/6783/54658/546<br>59/54577/54600/7364                                                                                                                      | 1<br>7 |
| BP | GO:<br>000<br>606<br>3 | uronic<br>acid<br>metabol<br>ic<br>process                     | 8/<br>4<br>6<br>8      | 23/<br>17<br>91<br>3  | 7.10<br>E-0<br>8 | 2.20<br>E-0<br>5 | 2.04<br>E-0<br>5 | 54658/54575/54659/54657/54578/54577/54600/7364                                                                                                                                                                          | 8      |
| BP | GO:<br>001<br>958<br>5 | glucuro<br>nate<br>metabol<br>ic<br>process                    | 8/<br>4<br>6<br>8      | 23/<br>17<br>91<br>3  | 7.10<br>E-0<br>8 | 2.20<br>E-0<br>5 | 2.04<br>E-0<br>5 | 54658/54575/54659/54657/54578/54577/54600/7364                                                                                                                                                                          | 8      |
| BP | GO:<br>009             | ammoni<br>um ion                                               | 2<br>0/<br>3/1         | 19<br>3/1             | 1.73<br>E-0      | 4.94<br>E-0      | 4.59<br>E-0      | 18/340485/1646/8644/635/54677/1812/79153/2822/3990/4128/84879/4953/64600/255<br>189/151056/126969/80736/60482/55304                                                                                                     | 2<br>0 |

|    |                        |                                                    |                        |                       |                  |                         |                         |                                                                                                                                        |        |
|----|------------------------|----------------------------------------------------|------------------------|-----------------------|------------------|-------------------------|-------------------------|----------------------------------------------------------------------------------------------------------------------------------------|--------|
|    | 716<br>4               | metabol<br>ic<br>process                           | 4<br>6<br>8            | 79<br>13              | 7                | 5                       | 5                       |                                                                                                                                        |        |
| BP | GO:<br>001<br>604<br>2 | lipid<br>cataboli<br>c<br>process                  | 2<br>4/<br>4<br>6<br>8 | 30<br>0/1<br>79<br>13 | 1.29<br>E-0<br>6 | 0.00<br>034<br>194<br>6 | 0.00<br>031<br>812<br>7 | 340485/51/55289/8644/54677/1591/66002/4051/79153/2822/3417/3667/3990/200879/<br>64600/151056/5333/51196/23007/9651/11001/412/6783/6822 | 2<br>4 |
| BP | GO:<br>000<br>820<br>2 | steroid<br>metabol<br>ic<br>process                | 2<br>4/<br>4<br>6<br>8 | 32<br>1/1<br>79<br>13 | 4.20<br>E-0<br>6 | 0.00<br>103<br>938<br>9 | 0.00<br>096<br>699      | 1646/8644/8542/5205/650/1050/1591/1551/84649/10202/51083/3158/3294/3990/1148<br>80/255738/6469/11001/6653/412/6783/6822/54658/7364     | 2<br>4 |
| BP | GO:<br>000<br>165<br>5 | urogenit<br>al<br>system<br>develop<br>ment        | 2<br>4/<br>4<br>6<br>8 | 32<br>4/1<br>79<br>13 | 4.93<br>E-0<br>6 | 0.00<br>114<br>268<br>7 | 0.00<br>106<br>309<br>3 | 650/100133941/1512/2018/3169/2624/2625/51301/6928/3237/3248/79191/4609/4953/<br>130497/255738/5314/51196/6382/6469/4091/4070/7380/7477 | 2<br>4 |
| BP | GO:<br>003<br>430<br>8 | primary<br>alcohol<br>metabol<br>ic<br>process     | 1<br>1/<br>4<br>6<br>8 | 78/<br>17<br>91<br>3  | 5.53<br>E-0<br>6 | 0.00<br>120<br>661<br>2 | 0.00<br>112<br>256<br>5 | 1646/8644/222/53630/650/84649/9249/151056/195814/6783/6822                                                                             | 1<br>1 |
| BP | GO:<br>004<br>240<br>3 | thyroid<br>hormon<br>e<br>metabol<br>ic<br>process | 6/<br>4<br>6<br>8      | 19/<br>17<br>91<br>3  | 6.26<br>E-0<br>6 | 0.00<br>128<br>977<br>1 | 0.00<br>119<br>993<br>1 | 53905/50506/90527/2625/51301/389434                                                                                                    | 6      |
| BP | GO:<br>004<br>883<br>9 | inner<br>ear<br>develop<br>ment                    | 1<br>7/<br>4<br>6<br>8 | 18<br>5/1<br>79<br>13 | 7.50<br>E-0<br>6 | 0.00<br>146<br>478<br>6 | 0.00<br>136<br>275<br>6 | 5205/650/64072/1050/9620/341640/2624/2625/10804/57822/3784/55283/4610/14046<br>9/5816/6469/80736                                       | 1<br>7 |
| BP | GO:<br>000             | flavonoi<br>d                                      | 5/<br>4                | 12/<br>17             | 8.11<br>E-0      | 0.00<br>150             | 0.00<br>139             | 54658/54575/54659/54577/54600                                                                                                          | 5      |

|    |                        |                                                                    |                        |                       |                  |                         |                         |                                                                                                                              |        |
|----|------------------------|--------------------------------------------------------------------|------------------------|-----------------------|------------------|-------------------------|-------------------------|------------------------------------------------------------------------------------------------------------------------------|--------|
|    | 981<br>2               | metabol<br>ic<br>process                                           | 6<br>8                 | 91<br>3               | 6                | 415<br>4                | 938<br>2                |                                                                                                                              |        |
| BP | GO:<br>007<br>200<br>1 | renal<br>system<br>develop<br>ment                                 | 2<br>2/<br>4<br>6<br>8 | 29<br>1/1<br>79<br>13 | 8.84<br>E-0<br>6 | 0.00<br>156<br>253<br>8 | 0.00<br>145<br>369<br>9 | 650/100133941/1512/2018/2625/51301/6928/3237/3248/79191/4609/4953/130497/25<br>5738/5314/51196/6382/6469/4091/4070/7380/7477 | 2<br>2 |
| BP | GO:<br>004<br>358<br>3 | ear<br>develop<br>ment                                             | 1<br>8/<br>4<br>6<br>8 | 21<br>2/1<br>79<br>13 | 1.22<br>E-0<br>5 | 0.00<br>198<br>042<br>7 | 0.00<br>184<br>248      | 5205/650/64072/1050/9620/341640/2624/2625/10804/57822/3784/55283/4610/14046<br>9/130497/5816/6469/80736                      | 1<br>8 |
| BP | GO:<br>190<br>156<br>8 | fatty<br>acid<br>derivativ<br>e<br>metabol<br>ic<br>process        | 1<br>5/<br>4<br>6<br>8 | 15<br>4/1<br>79<br>13 | 1.28<br>E-0<br>5 | 0.00<br>198<br>042<br>7 | 0.00<br>184<br>248      | 51/51703/1646/8644/240/66002/126410/4051/11283/84649/124975/3158/3248/5019/2<br>55189                                        | 1<br>5 |
| BP | GO:<br>000<br>182<br>2 | kidney<br>develop<br>ment                                          | 2<br>1/<br>4<br>6<br>8 | 27<br>6/1<br>79<br>13 | 1.28<br>E-0<br>5 | 0.00<br>198<br>042<br>7 | 0.00<br>184<br>248      | 650/100133941/1512/2625/51301/6928/3237/3248/79191/4609/4953/130497/255738/<br>5314/51196/6382/6469/4091/4070/7380/7477      | 2<br>1 |
| BP | GO:<br>000<br>657<br>5 | cellular<br>modifie<br>d amino<br>acid<br>metabol<br>ic<br>process | 1<br>6/<br>4<br>6<br>8 | 17<br>9/1<br>79<br>13 | 1.96<br>E-0<br>5 | 0.00<br>290<br>702<br>3 | 0.00<br>270<br>453<br>4 | 10840/635/54677/53905/50506/90527/2625/51301/124975/2947/2948/3417/389434/6<br>4600/255189/347735                            | 1<br>6 |
| BP | GO:<br>000<br>152<br>3 | retinoid<br>metabol<br>ic<br>process                               | 1<br>1/<br>4<br>6<br>8 | 91/<br>17<br>91<br>3  | 2.48<br>E-0<br>5 | 0.00<br>353<br>926<br>7 | 0.00<br>329<br>273<br>9 | 8644/53630/84649/9249/151056/6382/195814/54658/54659/54577/54600                                                             | 1<br>1 |

|    |                        |                                                                |                        |                       |                  |                         |                         |                                                                                                                              |        |
|----|------------------------|----------------------------------------------------------------|------------------------|-----------------------|------------------|-------------------------|-------------------------|------------------------------------------------------------------------------------------------------------------------------|--------|
| BP | GO:<br>007<br>208<br>0 | nephron<br>tubule<br>develop<br>ment                           | 1<br>1/<br>4<br>6<br>8 | 93/<br>17<br>91<br>3  | 3.05<br>E-0<br>5 | 0.00<br>418<br>827<br>9 | 0.00<br>389<br>654<br>3 | 650/100133941/2625/6928/3237/79191/4609/130497/6469/4070/7477                                                                | 1<br>1 |
| BP | GO:<br>000<br>606<br>6 | alcohol<br>metabol<br>ic<br>process                            | 2<br>3/<br>4<br>6<br>8 | 33<br>9/1<br>79<br>13 | 3.16<br>E-0<br>5 | 0.00<br>418<br>827<br>9 | 0.00<br>389<br>654<br>3 | 340485/1646/8644/222/8542/53630/650/1050/84649/9249/3158/8821/3990/255738/151056/5333/51196/23007/9651/195814/6653/6783/6822 | 2<br>3 |
| BP | GO:<br>006<br>099<br>3 | kidney<br>morpho<br>genesis                                    | 1<br>1/<br>4<br>6<br>8 | 95/<br>17<br>91<br>3  | 3.73<br>E-0<br>5 | 0.00<br>460<br>868<br>6 | 0.00<br>428<br>766<br>6 | 650/2625/51301/6928/3237/79191/4609/130497/6469/4070/7477                                                                    | 1<br>1 |
| BP | GO:<br>006<br>132<br>6 | renal<br>tubule<br>develop<br>ment                             | 1<br>1/<br>4<br>6<br>8 | 95/<br>17<br>91<br>3  | 3.73<br>E-0<br>5 | 0.00<br>460<br>868<br>6 | 0.00<br>428<br>766<br>6 | 650/100133941/2625/6928/3237/79191/4609/130497/6469/4070/7477                                                                | 1<br>1 |
| BP | GO:<br>000<br>659<br>0 | thyroid<br>hormon<br>e<br>generati<br>on                       | 5/<br>4<br>6<br>8      | 16/<br>17<br>91<br>3  | 4.10<br>E-0<br>5 | 0.00<br>490<br>765<br>1 | 0.00<br>456<br>580<br>7 | 53905/50506/90527/2625/389434                                                                                                | 5      |
| BP | GO:<br>001<br>610<br>1 | diterpen<br>oid<br>metabol<br>ic<br>process                    | 1<br>1/<br>4<br>6<br>8 | 97/<br>17<br>91<br>3  | 4.53<br>E-0<br>5 | 0.00<br>525<br>239<br>6 | 0.00<br>488<br>653<br>9 | 8644/53630/84649/9249/151056/6382/195814/54658/54659/54577/54600                                                             | 1<br>1 |
| BP | GO:<br>009<br>018<br>5 | negativ<br>e<br>regulati<br>on of<br>kidney<br>develop<br>ment | 5/<br>4<br>6<br>8      | 17/<br>17<br>91<br>3  | 5.69<br>E-0<br>5 | 0.00<br>639<br>134<br>9 | 0.00<br>594<br>615<br>8 | 2625/6928/130497/6469/4070                                                                                                   | 5      |

|    |                        |                                                |                        |                       |                         |                         |                         |                                                                                                                                                             |        |
|----|------------------------|------------------------------------------------|------------------------|-----------------------|-------------------------|-------------------------|-------------------------|-------------------------------------------------------------------------------------------------------------------------------------------------------------|--------|
| BP | GO:<br>001<br>567<br>2 | monovalent<br>inorganic<br>cation<br>transport | 2<br>8/<br>4<br>6<br>8 | 47<br>7/1<br>79<br>13 | 6.15<br>E-0<br>5        | 0.00<br>671<br>046<br>5 | 0.00<br>624<br>304<br>5 | 480/245973/776/1528/1812/5349/53828/51083/23171/3748/3755/3772/8645/3783/3784/130497/255738/148811/6338/6340/6564/81031/83959/60482/55117/6549/389015/54997 | 2<br>8 |
| BP | GO:<br>000<br>669<br>0 | icosanoid<br>metabolic<br>process              | 1<br>1/<br>4<br>6<br>8 | 10<br>2/1<br>79<br>13 | 7.22<br>E-0<br>5        | 0.00<br>765<br>220<br>8 | 0.00<br>711<br>919<br>1 | 51/1646/8644/240/66002/126410/4051/11283/124975/3248/255189                                                                                                 | 1<br>1 |
| BP | GO:<br>007<br>207<br>3 | kidney<br>epithelium<br>development            | 1<br>3/<br>4<br>6<br>8 | 14<br>0/1<br>79<br>13 | 7.89<br>E-0<br>5        | 0.00<br>812<br>609<br>2 | 0.00<br>756<br>006<br>7 | 650/100133941/2625/6928/3237/79191/4609/130497/6382/6469/4091/4070/7477                                                                                     | 1<br>3 |
| BP | GO:<br>000<br>663<br>1 | fatty<br>acid<br>metabolic<br>process          | 2<br>2/<br>4<br>6<br>8 | 33<br>9/1<br>79<br>13 | 9.02<br>E-0<br>5        | 0.00<br>904<br>510<br>5 | 0.00<br>841<br>506<br>6 | 51/55289/80221/51703/1646/8644/240/634/54677/57834/66002/4051/11283/84649/79152/2948/3248/3667/3990/255189/5468/11001                                       | 2<br>2 |
| BP | GO:<br>001<br>700<br>1 | antibiotic<br>catabolic<br>process             | 7/<br>4<br>6<br>8      | 42/<br>17<br>91<br>3  | 9.71<br>E-0<br>5        | 0.00<br>947<br>824<br>3 | 0.00<br>881<br>803<br>4 | 8644/222/53905/50506/6783/6822/54658                                                                                                                        | 7      |
| BP | GO:<br>001<br>087<br>6 | lipid<br>localization                          | 2<br>3/<br>4<br>6<br>8 | 36<br>6/1<br>79<br>13 | 0.00<br>010<br>189<br>4 | 0.00<br>951<br>620<br>3 | 0.00<br>885<br>335      | 8714/8542/80832/23120/5205/2583/634/54677/84649/83850/51083/3783/3990/84879/114880/255738/64600/255189/5468/6469/11001/28234/6653                           | 2<br>3 |
| BP | GO:<br>000<br>672<br>1 | terpenoid<br>metabolic<br>process              | 1<br>1/<br>4<br>6<br>8 | 10<br>6/1<br>79<br>13 | 0.00<br>010<br>260<br>1 | 0.00<br>951<br>620<br>3 | 0.00<br>885<br>335      | 8644/53630/84649/9249/151056/6382/195814/54658/54659/54577/54600                                                                                            | 1<br>1 |

|    |                        |                                                                          |                         |                       |                         |                         |                         |                                                               |        |
|----|------------------------|--------------------------------------------------------------------------|-------------------------|-----------------------|-------------------------|-------------------------|-------------------------|---------------------------------------------------------------|--------|
| BP | GO:<br>004<br>257<br>2 | retinol<br>metabol<br>ic<br>process                                      | 6/<br>4<br>6<br>8       | 31/<br>17<br>91<br>3  | 0.00<br>013<br>013<br>5 | 0.01<br>166<br>348      | 0.01<br>085<br>105<br>7 | 8644/53630/84649/9249/151056/195814                           | 6      |
| BP | GO:<br>007<br>200<br>9 | nephron<br>epitheli<br>um<br>develop<br>ment                             | 1/<br>1/<br>4<br>6<br>8 | 10<br>9/1<br>79<br>13 | 0.00<br>013<br>203<br>9 | 0.01<br>166<br>348      | 0.01<br>085<br>105<br>7 | 650/100133941/2625/6928/3237/79191/4609/130497/6469/4070/7477 | 1<br>1 |
| BP | GO:<br>190<br>161<br>6 | organic<br>hydroxy<br>compou<br>nd<br>cataboli<br>c<br>process           | 8/<br>4<br>6<br>8       | 59/<br>17<br>91<br>3  | 0.00<br>014<br>084<br>8 | 0.01<br>205<br>969<br>7 | 0.01<br>121<br>967<br>5 | 8644/222/1591/66002/4051/4128/6783/6822                       | 8      |
| BP | GO:<br>007<br>207<br>8 | nephron<br>tubule<br>morpho<br>genesis                                   | 9/<br>4<br>6<br>8       | 75/<br>17<br>91<br>3  | 0.00<br>014<br>302<br>6 | 0.01<br>205<br>969<br>7 | 0.01<br>121<br>967<br>5 | 650/2625/6928/3237/79191/4609/130497/6469/4070                | 9      |
| BP | GO:<br>004<br>257<br>3 | retinoic<br>acid<br>metabol<br>ic<br>process                             | 5/<br>4<br>6<br>8       | 21/<br>17<br>91<br>3  | 0.00<br>017<br>147<br>4 | 0.01<br>382<br>974<br>3 | 0.01<br>286<br>642<br>9 | 8644/54658/54659/54577/54600                                  | 5      |
| BP | GO:<br>007<br>211<br>1 | cell<br>prolifera<br>tion<br>involved<br>in<br>kidney<br>develop<br>ment | 5/<br>4<br>6<br>8       | 21/<br>17<br>91<br>3  | 0.00<br>017<br>147<br>4 | 0.01<br>382<br>974<br>3 | 0.01<br>286<br>642<br>9 | 650/2625/4609/130497/6469                                     | 5      |
| BP | GO:<br>007<br>208<br>8 | nephron<br>epitheli<br>um<br>morpho                                      | 9/<br>4<br>6<br>8       | 77/<br>17<br>91<br>3  | 0.00<br>017<br>545<br>3 | 0.01<br>384<br>956<br>6 | 0.01<br>288<br>487<br>1 | 650/2625/6928/3237/79191/4609/130497/6469/4070                | 9      |

|    |                        |                                                              |                        |                       |                         |                         |                         |                                                                                                                        |        |
|----|------------------------|--------------------------------------------------------------|------------------------|-----------------------|-------------------------|-------------------------|-------------------------|------------------------------------------------------------------------------------------------------------------------|--------|
|    |                        | genesis                                                      |                        |                       |                         |                         |                         |                                                                                                                        |        |
| BP | GO:<br>000<br>686<br>9 | lipid<br>transport                                           | 2<br>1/<br>4<br>6<br>8 | 33<br>2/1<br>79<br>13 | 0.00<br>018<br>484<br>5 | 0.01<br>428<br>694<br>9 | 0.01<br>329<br>178<br>8 | 8714/8542/80832/23120/5205/634/54677/83850/51083/3783/3990/84879/114880/255738/64600/255189/5468/6469/11001/28234/6653 | 2<br>1 |
| BP | GO:<br>006<br>133<br>3 | renal<br>tubule<br>morpho<br>genesis                         | 9/<br>4<br>6<br>8      | 79/<br>17<br>91<br>3  | 0.00<br>021<br>378<br>1 | 0.01<br>586<br>256<br>7 | 0.01<br>475<br>765<br>6 | 650/2625/6928/3237/79191/4609/130497/6469/4070                                                                         | 9      |
| BP | GO:<br>007<br>202<br>8 | nephron<br>morpho<br>genesis                                 | 9/<br>4<br>6<br>8      | 79/<br>17<br>91<br>3  | 0.00<br>021<br>378<br>1 | 0.01<br>586<br>256<br>7 | 0.01<br>475<br>765<br>6 | 650/2625/6928/3237/79191/4609/130497/6469/4070                                                                         | 9      |
| BP | GO:<br>002<br>261<br>2 | gland<br>morpho<br>genesis                                   | 1<br>1/<br>4<br>6<br>8 | 11<br>6/1<br>79<br>13 | 0.00<br>022<br>975<br>6 | 0.01<br>671<br>363<br>2 | 0.01<br>554<br>944      | 634/1999/80004/3169/4488/59277/5080/10512/6469/6909/6926                                                               | 1<br>1 |
| BP | GO:<br>000<br>165<br>7 | ureteric<br>bud<br>develop<br>ment                           | 1<br>0/<br>4<br>6<br>8 | 98/<br>17<br>91<br>3  | 0.00<br>024<br>183<br>1 | 0.01<br>725<br>368<br>6 | 0.01<br>605<br>187<br>5 | 650/2625/6928/3237/4609/130497/6382/6469/4091/4070                                                                     | 1<br>0 |
| BP | GO:<br>006<br>113<br>8 | morpho<br>genesis<br>of a<br>branchi<br>ng<br>epitheli<br>um | 1<br>4/<br>4<br>6<br>8 | 17<br>8/1<br>79<br>13 | 0.00<br>024<br>996<br>2 | 0.01<br>741<br>359<br>3 | 0.01<br>620<br>064<br>4 | 650/9620/1512/80004/3169/6928/3237/4488/4609/59277/10512/6469/4070/6926                                                | 1<br>4 |
| BP | GO:<br>001<br>571<br>8 | monoca<br>rboxylic<br>acid<br>transport                      | 1<br>2/<br>4<br>6<br>8 | 13<br>7/1<br>79<br>13 | 0.00<br>025<br>535<br>8 | 0.01<br>741<br>359<br>3 | 0.01<br>620<br>064<br>4 | 18/8714/5205/634/54677/84879/64600/255189/5468/6566/11001/28234                                                        | 1<br>2 |



|    |                        |                                                          |                        |                      |                         |                         |                         |                                                                  |        |
|----|------------------------|----------------------------------------------------------|------------------------|----------------------|-------------------------|-------------------------|-------------------------|------------------------------------------------------------------|--------|
| BP | GO:<br>007<br>216<br>3 | mesone<br>phric<br>epitheli<br>um<br>develop<br>ment     | 1<br>0/<br>4<br>6<br>8 | 99/<br>17<br>91<br>3 | 0.00<br>026<br>284<br>7 | 0.01<br>741<br>359<br>3 | 0.01<br>620<br>064<br>4 | 650/2625/6928/3237/4609/130497/6382/6469/4091/4070               | 1<br>0 |
| BP | GO:<br>007<br>216<br>4 | mesone<br>phric<br>tubule<br>develop<br>ment             | 1<br>0/<br>4<br>6<br>8 | 99/<br>17<br>91<br>3 | 0.00<br>026<br>284<br>7 | 0.01<br>741<br>359<br>3 | 0.01<br>620<br>064<br>4 | 650/2625/6928/3237/4609/130497/6382/6469/4091/4070               | 1<br>0 |
| BP | GO:<br>002<br>197<br>8 | telence<br>phalon<br>regional<br>ization                 | 4/<br>4<br>6<br>8      | 13/<br>17<br>91<br>3 | 0.00<br>027<br>264<br>2 | 0.01<br>743<br>971<br>8 | 0.01<br>622<br>495      | 650/2018/5080/6469                                               | 4      |
| BP | GO:<br>003<br>253<br>0 | regulati<br>on of<br>microvill<br>us<br>organiz<br>ation | 4/<br>4<br>6<br>8      | 13/<br>17<br>91<br>3 | 0.00<br>027<br>264<br>2 | 0.01<br>743<br>971<br>8 | 0.01<br>622<br>495      | 5205/6624/5357/5909                                              | 4      |
| BP | GO:<br>004<br>647<br>0 | phosph<br>atidylch<br>oline<br>metabol<br>ic<br>process  | 9/<br>4<br>6<br>8      | 82/<br>17<br>91<br>3 | 0.00<br>028<br>413      | 0.01<br>786<br>647<br>7 | 0.01<br>662<br>198<br>3 | 79153/2822/3990/84879/64600/255189/151056/126969/80736           | 9      |
| BP | GO:<br>005<br>118<br>7 | cofactor<br>cataboli<br>c<br>process                     | 7/<br>4<br>6<br>8      | 50/<br>17<br>91<br>3 | 0.00<br>030<br>028      | 0.01<br>826<br>291      | 0.01<br>699<br>080<br>2 | 10840/57834/53905/50506/124975/54658/54657                       | 7      |
| BP | GO:<br>006<br>042<br>5 | lung<br>morpho<br>genesis                                | 7/<br>4<br>6<br>8      | 50/<br>17<br>91<br>3 | 0.00<br>030<br>028      | 0.01<br>826<br>291      | 0.01<br>699<br>080<br>2 | 9620/1512/80004/3169/3397/6469/7477                              | 7      |
| BP | GO:                    | isopren                                                  | 1                      | 12                   | 0.00                    | 0.01                    | 0.01                    | 8644/53630/84649/9249/151056/6382/195814/54658/54659/54577/54600 | 1      |

|    |            |                                            |        |           |             |             |             |                                                                                     |    |
|----|------------|--------------------------------------------|--------|-----------|-------------|-------------|-------------|-------------------------------------------------------------------------------------|----|
|    | 0006720    | oid metabolic process                      | 1/468  | 1/17138   | 0332152     | 9711275     | 8338281     |                                                                                     | 1  |
| BP | GO:0021871 | forebrain regionalization                  | 5/468  | 24/17913  | 0.000335739 | 0.019711275 | 0.018338281 | 650/2018/5080/6469/7477                                                             | 5  |
| BP | GO:0015850 | organic hydroxy compound transport         | 16/468 | 22/817913 | 0.000341194 | 0.019711275 | 0.018338281 | 18/8714/5205/634/1812/51083/3990/114880/255738/5468/10928/6469/6566/6532/28234/6623 | 16 |
| BP | GO:0072171 | mesonephric tubule morphogenesis           | 8/468  | 67/17913  | 0.000345346 | 0.019711275 | 0.018338281 | 650/2625/6928/3237/4609/130497/6469/4070                                            | 8  |
| BP | GO:0072006 | nephron development                        | 12/468 | 14/217913 | 0.000355571 | 0.019987392 | 0.018595165 | 650/100133941/2625/6928/3237/79191/4609/130497/51196/6469/4070/7477                 | 12 |
| BP | GO:001823  | mesonephros development                    | 10/468 | 10/317913 | 0.000362839 | 0.020091519 | 0.018692038 | 650/2625/6928/3237/4609/130497/6382/6469/4091/4070                                  | 10 |
| BP | GO:0050891 | multicellular organismal water homeostasis | 8/468  | 68/17913  | 0.000382601 | 0.020874245 | 0.019420244 | 1364/66002/79152/29841/57822/4645/6338/6340                                         | 8  |

|    |                        |                                                                    |                        |                       |                         |                         |                         |                                                                              |        |
|----|------------------------|--------------------------------------------------------------------|------------------------|-----------------------|-------------------------|-------------------------|-------------------------|------------------------------------------------------------------------------|--------|
| BP | GO:<br>000<br>666<br>5 | sphingo<br>lipid<br>metabol<br>ic<br>process                       | 1<br>2/<br>4<br>6<br>8 | 14<br>4/1<br>79<br>13 | 0.00<br>040<br>407<br>1 | 0.02<br>172<br>614<br>1 | 0.02<br>021<br>280<br>1 | 340485/222/2583/83850/79152/2525/2528/347735/55304/165679/8869/412           | 1<br>2 |
| BP | GO:<br>004<br>875<br>4 | branchi<br>ng<br>morpho<br>genesis<br>of an<br>epitheli<br>al tube | 1<br>2/<br>4<br>6<br>8 | 14<br>6/1<br>79<br>13 | 0.00<br>045<br>804<br>4 | 0.02<br>427<br>635<br>4 | 0.02<br>258<br>537<br>8 | 650/9620/1512/80004/3169/6928/3237/4488/4609/6469/4070/6926                  | 1<br>2 |
| BP | GO:<br>003<br>431<br>0 | primary<br>alcohol<br>cataboli<br>c<br>process                     | 4/<br>4<br>6<br>8      | 15/<br>17<br>91<br>3  | 0.00<br>049<br>931<br>7 | 0.02<br>572<br>872<br>1 | 0.02<br>393<br>658      | 8644/222/6783/6822                                                           | 4      |
| BP | GO:<br>005<br>192<br>3 | sulfation                                                          | 4/<br>4<br>6<br>8      | 15/<br>17<br>91<br>3  | 0.00<br>049<br>931<br>7 | 0.02<br>572<br>872<br>1 | 0.02<br>393<br>658      | 222537/6783/6822/10090                                                       | 4      |
| BP | GO:<br>000<br>664<br>3 | membra<br>ne lipid<br>metabol<br>ic<br>process                     | 1<br>4/<br>4<br>6<br>8 | 19<br>1/1<br>79<br>13 | 0.00<br>051<br>186<br>7 | 0.02<br>601<br>407<br>1 | 0.02<br>420<br>205<br>4 | 340485/222/2583/83850/79152/2525/2528/2822/347735/55304/165679/6484/8869/412 | 1<br>4 |
| BP | GO:<br>000<br>176<br>3 | morpho<br>genesis<br>of a<br>branchi<br>ng<br>structur<br>e        | 1<br>4/<br>4<br>6<br>8 | 19<br>2/1<br>79<br>13 | 0.00<br>053<br>926<br>5 | 0.02<br>703<br>612<br>8 | 0.02<br>515<br>291<br>9 | 650/9620/1512/80004/3169/6928/3237/4488/4609/59277/10512/6469/4070/6926      | 1<br>4 |
| BP | GO:<br>001<br>699<br>9 | antibioti<br>c<br>metabol<br>ic                                    | 1<br>1/<br>4<br>6      | 13<br>0/1<br>79<br>13 | 0.00<br>061<br>325<br>5 | 0.03<br>027<br>326<br>6 | 0.02<br>816<br>457<br>3 | 1646/8644/222/1580/53905/50506/90527/3417/6783/6822/54658                    | 1<br>1 |

|    |                        |                                               |                        |                       |                         |                         |                         |                                                                                                     |        |
|----|------------------------|-----------------------------------------------|------------------------|-----------------------|-------------------------|-------------------------|-------------------------|-----------------------------------------------------------------------------------------------------|--------|
|    |                        | process                                       | 8                      |                       |                         |                         |                         |                                                                                                     |        |
| BP | GO:<br>003<br>085<br>6 | regulation of epithelial cell differentiation | 1<br>2/<br>4<br>6<br>8 | 15<br>1/1<br>79<br>13 | 0.00<br>062<br>015<br>3 | 0.03<br>027<br>326<br>6 | 0.02<br>816<br>457<br>3 | 84913/100133941/634/1515/2625/29841/3397/4488/4610/130497/5080/6926                                 | 1<br>2 |
| BP | GO:<br>000<br>669<br>2 | prostanoid metabolic process                  | 6/<br>4<br>6<br>8      | 41/<br>17<br>91<br>3  | 0.00<br>063<br>739<br>5 | 0.03<br>031<br>714<br>1 | 0.02<br>820<br>539<br>2 | 51/1646/8644/11283/3248/255189                                                                      | 6      |
| BP | GO:<br>000<br>669<br>3 | prostaglandin metabolic process               | 6/<br>4<br>6<br>8      | 41/<br>17<br>91<br>3  | 0.00<br>063<br>739<br>5 | 0.03<br>031<br>714<br>1 | 0.02<br>820<br>539<br>2 | 51/1646/8644/11283/3248/255189                                                                      | 6      |
| BP | GO:<br>007<br>218<br>9 | ureter development                            | 4/<br>4<br>6<br>8      | 16/<br>17<br>91<br>3  | 0.00<br>065<br>208<br>8 | 0.03<br>062<br>335<br>2 | 0.02<br>849<br>027<br>4 | 2018/2625/130497/6469                                                                               | 4      |
| BP | GO:<br>009<br>018<br>3 | regulation of kidney development              | 7/<br>4<br>6<br>8      | 57/<br>17<br>91<br>3  | 0.00<br>067<br>941<br>8 | 0.03<br>118<br>173      | 0.02<br>900<br>975<br>8 | 100133941/2625/6928/4609/130497/6469/4070                                                           | 7      |
| BP | GO:<br>003<br>010<br>4 | water homeostasis                             | 8/<br>4<br>6<br>8      | 74/<br>17<br>91<br>3  | 0.00<br>068<br>078<br>7 | 0.03<br>118<br>173      | 0.02<br>900<br>975<br>8 | 1364/66002/79152/29841/57822/4645/6338/6340                                                         | 8      |
| BP | GO:<br>000<br>300<br>2 | regionalization                               | 1<br>9/<br>4<br>6<br>8 | 31<br>8/1<br>79<br>13 | 0.00<br>074<br>145<br>4 | 0.03<br>354<br>627<br>6 | 0.03<br>120<br>960<br>2 | 8092/650/9620/2018/3169/6928/3237/79191/4488/130497/5080/5046/168507/10512/6405/6469/4091/6926/7477 | 1<br>9 |
| BP | GO:                    | long-ch                                       | 9/<br>94/              | 94/                   | 0.00                    | 0.03                    | 0.03                    | 51/51703/8644/240/66002/4051/2948/3248/11001                                                        | 9      |

|    |                        |                                                                                  |                        |                       |                         |                         |                         |                                                                                                                         |        |
|----|------------------------|----------------------------------------------------------------------------------|------------------------|-----------------------|-------------------------|-------------------------|-------------------------|-------------------------------------------------------------------------------------------------------------------------|--------|
|    | 000<br>167<br>6        | ain fatty<br>acid<br>metabol<br>ic<br>process                                    | 4<br>6<br>8            | 17<br>91<br>3         | 078<br>328<br>1         | 501<br>170<br>5         | 257<br>295<br>5         |                                                                                                                         |        |
| BP | GO:<br>006<br>044<br>1 | epitheli<br>al tube<br>branchi<br>ng<br>involved<br>in lung<br>morpho<br>genesis | 5/<br>4<br>6<br>8      | 29/<br>17<br>91<br>3  | 0.00<br>084<br>244<br>5 | 0.03<br>706<br>179<br>9 | 0.03<br>448<br>025      | 9620/1512/80004/3169/6469                                                                                               | 5      |
| BP | GO:<br>005<br>067<br>3 | epitheli<br>al cell<br>prolifera<br>tion                                         | 2<br>3/<br>4<br>6<br>8 | 42<br>5/1<br>79<br>13 | 0.00<br>084<br>912<br>5 | 0.03<br>706<br>179<br>9 | 0.03<br>448<br>025      | 84913/650/634/26298/2064/80004/9982/2624/2625/6928/3397/3486/4609/130497/5080/5468/5797/195814/9037/6469/4070/7049/7051 | 2<br>3 |
| BP | GO:<br>006<br>041<br>1 | cardiac<br>septum<br>morpho<br>genesis                                           | 8/<br>4<br>6<br>8      | 77/<br>17<br>91<br>3  | 0.00<br>088<br>802<br>5 | 0.03<br>830<br>897<br>2 | 0.03<br>564<br>055      | 9249/8701/4488/10512/4091/6909/6926/7049                                                                                | 8      |
| BP | GO:<br>001<br>895<br>8 | phenol-<br>containi<br>ng<br>compou<br>nd<br>metabol<br>ic<br>process            | 9/<br>4<br>6<br>8      | 96/<br>17<br>91<br>3  | 0.00<br>091<br>205<br>9 | 0.03<br>889<br>356<br>3 | 0.03<br>618<br>442<br>1 | 18/1812/53905/50506/90527/2625/51301/389434/4128                                                                        | 9      |
| BP | GO:<br>000<br>599<br>6 | monosa<br>ccharid<br>e<br>metabol<br>ic<br>process                               | 1<br>7/<br>4<br>6<br>8 | 27<br>7/1<br>79<br>13 | 0.00<br>103<br>463<br>8 | 0.04<br>361<br>940<br>2 | 0.04<br>058<br>108      | 669/1528/84649/2203/2528/10690/2822/3486/3667/54658/54575/54659/54657/54578/54577/54600/7364                            | 1<br>7 |

|        |                        |                                                              |                        |                       |                         |                         |                         |                                                                                                                                                                                  |        |
|--------|------------------------|--------------------------------------------------------------|------------------------|-----------------------|-------------------------|-------------------------|-------------------------|----------------------------------------------------------------------------------------------------------------------------------------------------------------------------------|--------|
| BP     | GO:<br>003<br>355<br>9 | unsatur<br>ated<br>fatty<br>acid<br>metabol<br>ic<br>process | 9/<br>4<br>6<br>8      | 98/<br>17<br>91<br>3  | 0.00<br>105<br>751<br>9 | 0.04<br>408<br>309<br>8 | 0.04<br>101<br>247<br>8 | 51/1646/8644/240/66002/4051/11283/3248/255189                                                                                                                                    | 9      |
| BP     | GO:<br>000<br>738<br>9 | pattern<br>specific<br>ation<br>process                      | 2<br>2/<br>4<br>6<br>8 | 40<br>8/1<br>79<br>13 | 0.00<br>114<br>464<br>7 | 0.04<br>718<br>489<br>9 | 0.04<br>389<br>822<br>2 | 8092/650/9620/8701/2018/3169/57822/6928/3237/79191/4488/130497/5080/5046/168<br>507/10512/6405/6469/4091/6909/6926/7477                                                          | 2<br>2 |
| C<br>C | GO:<br>004<br>517<br>7 | apical<br>part of<br>cell                                    | 3<br>0/<br>4<br>9<br>1 | 36<br>5/1<br>86<br>78 | 3.87<br>E-0<br>8        | 1.30<br>E-0<br>5        | 1.19<br>E-0<br>5        | 5205/762/634/22802/1364/1515/66002/1600/53905/50506/2064/2065/10804/9455/411<br>8/4257/200958/4645/100506658/5314/151056/92840/6338/6340/80736/113278/38901<br>5/11045/7348/7380 | 3<br>0 |
| C<br>C | GO:<br>000<br>153<br>3 | cornifie<br>d<br>envelop<br>e                                | 1<br>0/<br>4<br>9<br>1 | 44/<br>18<br>67<br>8  | 1.60<br>E-0<br>7        | 2.69<br>E-0<br>5        | 2.47<br>E-0<br>5        | 1825/1830/2125/645027/3713/5493/6700/6703/6707/7051                                                                                                                              | 1<br>0 |
| C<br>C | GO:<br>001<br>632<br>4 | apical<br>plasma<br>membra<br>ne                             | 2<br>4/<br>4<br>9<br>1 | 30<br>0/1<br>86<br>78 | 1.45<br>E-0<br>6        | 0.00<br>016<br>290<br>5 | 0.00<br>014<br>953<br>4 | 5205/762/634/22802/1364/66002/53905/50506/2064/2065/10804/4118/200958/10050<br>6658/5314/151056/6338/6340/80736/113278/389015/11045/7348/7380                                    | 2<br>4 |
| C<br>C | GO:<br>004<br>509<br>5 | keratin<br>filament                                          | 1<br>0/<br>4<br>9<br>1 | 97/<br>18<br>67<br>8  | 0.00<br>023<br>400<br>9 | 0.01<br>213<br>454<br>4 | 0.01<br>113<br>853<br>8 | 3875/3852/3853/3854/286887/3855/3887/440050/57830/3846                                                                                                                           | 1<br>0 |
| C<br>C | GO:<br>000<br>590<br>2 | microvill<br>us                                              | 9/<br>4<br>9<br>1      | 80/<br>18<br>67<br>8  | 0.00<br>024<br>684<br>3 | 0.01<br>213<br>454<br>4 | 0.01<br>113<br>853<br>8 | 634/1515/3169/6624/200958/55200/150696/6286/84958                                                                                                                                | 9      |

|        |                        |                                                          |                        |                       |                         |                         |                         |                                                                                         |        |
|--------|------------------------|----------------------------------------------------------|------------------------|-----------------------|-------------------------|-------------------------|-------------------------|-----------------------------------------------------------------------------------------|--------|
| C<br>C | GO:<br>009<br>885<br>8 | actin-ba<br>sed cell<br>projecti<br>on                   | 1<br>5/<br>4<br>9<br>1 | 20<br>0/1<br>86<br>78 | 0.00<br>027<br>381<br>1 | 0.01<br>213<br>454<br>4 | 0.01<br>113<br>853<br>8 | 5205/64072/634/1515/3169/6624/9455/200958/140469/55200/150696/5816/6286/849<br>58/57451 | 1<br>5 |
| C<br>C | GO:<br>003<br>152<br>8 | microvill<br>us<br>membra<br>ne                          | 5/<br>4<br>9<br>1      | 23/<br>18<br>67<br>8  | 0.00<br>027<br>961<br>6 | 0.01<br>213<br>454<br>4 | 0.01<br>113<br>853<br>8 | 634/200958/150696/6286/84958                                                            | 5      |
| C<br>C | GO:<br>001<br>632<br>3 | basolat<br>eral<br>plasma<br>membra<br>ne                | 1<br>5/<br>4<br>9<br>1 | 20<br>1/1<br>86<br>78 | 0.00<br>028<br>891<br>8 | 0.01<br>213<br>454<br>4 | 0.01<br>113<br>853<br>8 | 634/1364/1366/2064/2065/3248/3784/200958/150696/57127/6563/83959/389015/282<br>34/4070  | 1<br>5 |
| C<br>C | GO:<br>003<br>005<br>7 | desmos<br>ome                                            | 5/<br>4<br>9<br>1      | 25/<br>18<br>67<br>8  | 0.00<br>042<br>276<br>8 | 0.01<br>578<br>332<br>4 | 0.01<br>448<br>782<br>6 | 1825/1830/2125/79983/5493                                                               | 5      |
| C<br>C | GO:<br>001<br>632<br>7 | apicolat<br>eral<br>plasma<br>membra<br>ne               | 4/<br>4<br>9<br>1      | 19/<br>18<br>67<br>8  | 0.00<br>133<br>566      | 0.04<br>332<br>201<br>1 | 0.03<br>976<br>613<br>2 | 1364/1366/3880/100506658                                                                | 4      |
| C<br>C | GO:<br>009<br>886<br>2 | cluster<br>of<br>actin-ba<br>sed cell<br>projecti<br>ons | 1<br>1/<br>4<br>9<br>1 | 14<br>3/1<br>86<br>78 | 0.00<br>141<br>828      | 0.04<br>332<br>201<br>1 | 0.03<br>976<br>613<br>2 | 5205/762/64072/1600/9455/79784/140469/5357/5816/85477/6564                              | 1<br>1 |
| M<br>F | GO:<br>001<br>502<br>0 | glucuro<br>nosyltra<br>nsferas<br>e<br>activity          | 9/<br>4<br>6<br>6      | 32/<br>16<br>96<br>9  | 1.32<br>E-0<br>7        | 7.19<br>E-0<br>5        | 6.08<br>E-0<br>5        | 54658/54575/54659/54657/54579/54578/54577/54600/7364                                    | 9      |
| M<br>F | GO:<br>002             | heme<br>binding                                          | 1<br>3/                | 10<br>6/1             | 6.66<br>E-0             | 0.00<br>182             | 0.00<br>153             | 1528/1591/1551/1580/57834/66002/126410/4051/11283/163720/53905/50506/79152              | 1<br>3 |

|        |                        |                                                                |                        |                       |                         |                         |                         |                                                                                                                               |        |
|--------|------------------------|----------------------------------------------------------------|------------------------|-----------------------|-------------------------|-------------------------|-------------------------|-------------------------------------------------------------------------------------------------------------------------------|--------|
|        | 003<br>7               |                                                                | 4<br>6<br>6            | 69<br>69              | 6                       | 163<br>4                | 891<br>5                |                                                                                                                               |        |
| M<br>F | GO:<br>004<br>690<br>6 | tetrapyrrole<br>binding                                        | 1<br>3/<br>4<br>6<br>6 | 11<br>6/1<br>69<br>69 | 1.80<br>E-0<br>5        | 0.00<br>327<br>434<br>7 | 0.00<br>276<br>616<br>6 | 1528/1591/1551/1580/57834/66002/126410/4051/11283/163720/53905/50506/79152                                                    | 1<br>3 |
| M<br>F | GO:<br>001<br>675<br>8 | transferase<br>activity,<br>transferring<br>hexosyl<br>groups  | 1<br>6/<br>4<br>6<br>6 | 19<br>4/1<br>69<br>69 | 9.35<br>E-0<br>5        | 0.01<br>106<br>088<br>4 | 0.00<br>934<br>422<br>8 | 10331/2583/2525/2528/10690/51301/3038/54658/54575/54659/54657/54579/54578/54577/54600/7364                                    | 1<br>6 |
| M<br>F | GO:<br>000<br>819<br>4 | UDP-glycosyltransferase<br>activity                            | 1<br>3/<br>4<br>6<br>6 | 13<br>8/1<br>69<br>69 | 0.00<br>011<br>154<br>2 | 0.01<br>106<br>088<br>4 | 0.00<br>934<br>422<br>8 | 10331/2583/51301/3038/54658/54575/54659/54657/54579/54578/54577/54600/7364                                                    | 1<br>3 |
| M<br>F | GO:<br>000<br>449<br>7 | monooxygenase<br>activity                                      | 1<br>0/<br>4<br>6<br>6 | 86/<br>16<br>96<br>9  | 0.00<br>012<br>132<br>6 | 0.01<br>106<br>088<br>4 | 0.00<br>934<br>422<br>8 | 1646/8644/1591/1551/1580/57834/66002/126410/4051/11283                                                                        | 1<br>0 |
| M<br>F | GO:<br>001<br>675<br>7 | transferase<br>activity,<br>transferring<br>glycosyl<br>groups | 1<br>8/<br>4<br>6<br>6 | 25<br>7/1<br>69<br>69 | 0.00<br>027<br>735<br>9 | 0.02<br>167<br>359<br>1 | 0.01<br>830<br>983<br>7 | 10331/2583/2525/2528/10690/51301/3038/6484/8869/54658/54575/54659/54657/54579/54578/54577/54600/7364                          | 1<br>8 |
| M<br>F | GO:<br>000<br>377<br>9 | actin<br>binding                                               | 2<br>2/<br>4<br>6<br>6 | 36<br>1/1<br>69<br>69 | 0.00<br>043<br>514<br>3 | 0.02<br>635<br>582<br>9 | 0.02<br>226<br>538<br>8 | 634/57530/22837/54869/6624/9455/22998/126353/79784/140469/4645/55930/79983/6275/85477/134549/6532/54212/84501/7134/50853/7739 | 2<br>2 |



|        |                        |                                                                                |                        |                       |                         |                         |                         |                                                                                                                                                    |        |
|--------|------------------------|--------------------------------------------------------------------------------|------------------------|-----------------------|-------------------------|-------------------------|-------------------------|----------------------------------------------------------------------------------------------------------------------------------------------------|--------|
| M<br>F | GO:<br>004<br>803<br>7 | cofactor<br>binding                                                            | 2<br>5/<br>4<br>6<br>6 | 43<br>8/1<br>69<br>69 | 0.00<br>048<br>299<br>5 | 0.02<br>635<br>582<br>9 | 0.02<br>226<br>538<br>8 | 18/51/150209/1528/1591/1551/1580/57834/66002/126410/4051/11283/163720/53905/<br>50506/79152/2330/23171/2947/2948/3248/3417/389434/4257/55304       | 2<br>5 |
| M<br>F | GO:<br>005<br>101<br>5 | actin<br>filament<br>binding                                                   | 1<br>2/<br>4<br>6<br>6 | 14<br>3/1<br>69<br>69 | 0.00<br>058<br>845<br>9 | 0.02<br>635<br>582<br>9 | 0.02<br>226<br>538<br>8 | 6624/126353/79784/4645/55930/79983/85477/134549/6532/7134/50853/7739                                                                               | 1<br>2 |
| M<br>F | GO:<br>000<br>802<br>8 | monoca<br>rboxylic<br>acid<br>transme<br>mbrane<br>transpor<br>ter<br>activity | 5/<br>4<br>6<br>6      | 26/<br>16<br>96<br>9  | 0.00<br>062<br>384<br>2 | 0.02<br>635<br>582<br>9 | 0.02<br>226<br>538<br>8 | 8714/634/84879/6566/28234                                                                                                                          | 5      |
| M<br>F | GO:<br>001<br>640<br>5 | CoA-lig<br>ase<br>activity                                                     | 5/<br>4<br>6<br>6      | 26/<br>16<br>96<br>9  | 0.00<br>062<br>384<br>2 | 0.02<br>635<br>582<br>9 | 0.02<br>226<br>538<br>8 | 80221/51703/6296/142827/11001                                                                                                                      | 5      |
| M<br>F | GO:<br>000<br>550<br>6 | iron ion<br>binding                                                            | 1<br>2/<br>4<br>6<br>6 | 14<br>4/1<br>69<br>69 | 0.00<br>062<br>637<br>3 | 0.02<br>635<br>582<br>9 | 0.02<br>226<br>538<br>8 | 240/1591/1551/1580/57834/66002/126410/4051/11283/163720/79152/4241                                                                                 | 1<br>2 |
| M<br>F | GO:<br>000<br>832<br>4 | cation<br>transme<br>mbrane<br>transpor<br>ter<br>activity                     | 2<br>6/<br>4<br>6<br>6 | 48<br>4/1<br>69<br>69 | 0.00<br>092<br>087<br>5 | 0.03<br>216<br>442<br>6 | 0.02<br>717<br>248<br>8 | 480/774/776/1528/53828/3748/3755/8645/3783/3784/152519/348938/168507/57127/6<br>338/6340/6564/81031/29986/80736/83959/60482/55117/6532/57156/55503 | 2<br>6 |
| M<br>F | GO:<br>000<br>500<br>1 | transme<br>mbrane<br>receptor<br>protein                                       | 4/<br>4<br>6<br>6      | 17/<br>16<br>96<br>9  | 0.00<br>100<br>544<br>8 | 0.03<br>216<br>442<br>6 | 0.02<br>717<br>248<br>8 | 5797/5801/10076/5803                                                                                                                               | 4      |

|        |                        |                                                     |                        |                       |                         |                         |                         |                                                                                                              |        |
|--------|------------------------|-----------------------------------------------------|------------------------|-----------------------|-------------------------|-------------------------|-------------------------|--------------------------------------------------------------------------------------------------------------|--------|
|        |                        | tyrosine phosphatase activity                       |                        |                       |                         |                         |                         |                                                                                                              |        |
| M<br>F | GO:<br>001<br>919<br>8 | transmembrane receptor protein phosphatase activity | 4/<br>4<br>6<br>6      | 17/<br>16<br>96<br>9  | 0.00<br>100<br>544<br>8 | 0.03<br>216<br>442<br>6 | 0.02<br>717<br>248<br>8 | 5797/5801/10076/5803                                                                                         | 4      |
| M<br>F | GO:<br>004<br>687<br>3 | metal ion transmembrane transporter activity        | 2<br>0/<br>4<br>6<br>6 | 33<br>7/1<br>69<br>69 | 0.00<br>108<br>212<br>1 | 0.03<br>216<br>442<br>6 | 0.02<br>717<br>248<br>8 | 480/774/776/53828/3748/3755/8645/3783/3784/152519/348938/168507/6338/6340/29986/83959/60482/55117/6532/55503 | 2<br>0 |
| M<br>F | GO:<br>000<br>425<br>2 | serine-type endopeptidase activity                  | 1<br>1/<br>4<br>6<br>6 | 13<br>3/1<br>69<br>69 | 0.00<br>110<br>970<br>3 | 0.03<br>216<br>442<br>6 | 0.02<br>717<br>248<br>8 | 1512/5655/11012/26085/341277/5046/255738/64063/54933/71113/56649                                             | 1<br>1 |
| M<br>F | GO:<br>003<br>329<br>3 | monocarboxylic acid binding                         | 7/<br>4<br>6<br>6      | 59/<br>16<br>96<br>9  | 0.00<br>111<br>900<br>8 | 0.03<br>216<br>442<br>6 | 0.02<br>717<br>248<br>8 | 1646/57834/5468/54658/54659/54577/54600                                                                      | 7      |
| M<br>F | GO:<br>000<br>520<br>0 | structural constituent of cytoskeleton              | 8/<br>4<br>6<br>6      | 77/<br>16<br>96<br>9  | 0.00<br>122<br>042      | 0.03<br>216<br>442<br>6 | 0.02<br>717<br>248<br>8 | 3880/54474/3852/3853/3854/5357/5493/50853                                                                    | 8      |

|        |                        |                                                                                                                                                     |                        |                       |                         |                         |                         |                                                                                                                                    |        |
|--------|------------------------|-----------------------------------------------------------------------------------------------------------------------------------------------------|------------------------|-----------------------|-------------------------|-------------------------|-------------------------|------------------------------------------------------------------------------------------------------------------------------------|--------|
| M<br>F | GO:<br>001<br>687<br>8 | acid-thi<br>ol ligase<br>activity                                                                                                                   | 5/<br>4<br>6<br>6      | 30/<br>16<br>96<br>9  | 0.00<br>123<br>483<br>2 | 0.03<br>216<br>442<br>6 | 0.02<br>717<br>248<br>8 | 80221/51703/6296/142827/11001                                                                                                      | 5      |
| M<br>F | GO:<br>002<br>289<br>0 | inorgani<br>c cation<br>transme<br>mbrane<br>transport<br>er<br>activity                                                                            | 2<br>4/<br>4<br>6<br>6 | 44<br>4/1<br>69<br>69 | 0.00<br>131<br>666<br>7 | 0.03<br>273<br>712<br>5 | 0.02<br>765<br>630<br>3 | 480/774/776/1528/53828/3748/3755/8645/3783/3784/152519/348938/168507/6338/6340/6564/81031/29986/83959/60482/55117/6532/57156/55503 | 2<br>4 |
| M<br>F | GO:<br>001<br>670<br>5 | oxidore<br>ductase<br>activity,<br>acting<br>on<br>paired<br>donors,<br>with<br>incorpor<br>ation or<br>reductio<br>n of<br>molecul<br>ar<br>oxygen | 1<br>1/<br>4<br>6<br>6 | 13<br>7/1<br>69<br>69 | 0.00<br>141<br>235<br>7 | 0.03<br>358<br>952<br>8 | 0.02<br>837<br>641<br>2 | 1646/8644/1591/1551/1580/57834/66002/126410/4051/11283/163720                                                                      | 1<br>1 |
| M<br>F | GO:<br>000<br>197<br>2 | retinoic<br>acid<br>binding                                                                                                                         | 4/<br>4<br>6<br>6      | 19/<br>16<br>96<br>9  | 0.00<br>156<br>773      | 0.03<br>573<br>118<br>7 | 0.03<br>018<br>568<br>4 | 54658/54659/54577/54600                                                                                                            | 4      |
| M<br>F | GO:<br>000<br>851<br>9 | ammoni<br>um<br>transme<br>mbrane<br>transport<br>er                                                                                                | 4/<br>4<br>6<br>6      | 20/<br>16<br>96<br>9  | 0.00<br>191<br>755<br>4 | 0.03<br>875<br>428<br>7 | 0.03<br>273<br>959<br>8 | 57127/80736/60482/6532                                                                                                             | 4      |

|        |                        |                                                                                                                                                                                                                                                    |                   |                      |                         |                         |                         |                                                  |   |
|--------|------------------------|----------------------------------------------------------------------------------------------------------------------------------------------------------------------------------------------------------------------------------------------------|-------------------|----------------------|-------------------------|-------------------------|-------------------------|--------------------------------------------------|---|
|        |                        | activity                                                                                                                                                                                                                                           |                   |                      |                         |                         |                         |                                                  |   |
| M<br>F | GO:<br>001<br>670<br>9 | oxidore<br>ductase<br>activity,<br>acting<br>on<br>paired<br>donors,<br>with<br>incorpor<br>ation or<br>reductio<br>n of<br>molecul<br>ar<br>oxygen,<br>NAD(P)<br>H as<br>one<br>donor,<br>and<br>incorpor<br>ation of<br>one<br>atom of<br>oxygen | 5/<br>4<br>6<br>6 | 33/<br>16<br>96<br>9 | 0.00<br>192<br>223<br>6 | 0.03<br>875<br>428<br>7 | 0.03<br>273<br>959<br>8 | 1646/8644/57834/66002/4051                       | 5 |
| M<br>F | GO:<br>000<br>462<br>0 | phosph<br>olipase<br>activity                                                                                                                                                                                                                      | 8/<br>4<br>6<br>6 | 83/<br>16<br>96<br>9 | 0.00<br>198<br>372<br>4 | 0.03<br>875<br>428<br>7 | 0.03<br>273<br>959<br>8 | 2822/3990/200879/64600/255189/151056/51196/23007 | 8 |
| M<br>F | GO:<br>007<br>234<br>1 | modifie<br>d amino<br>acid<br>binding                                                                                                                                                                                                              | 7/<br>4<br>6<br>6 | 65/<br>16<br>96<br>9 | 0.00<br>198<br>376<br>6 | 0.03<br>875<br>428<br>7 | 0.03<br>273<br>959<br>8 | 8416/2947/2948/4257/84069/85477/54843            | 7 |
| M<br>F | GO:<br>000             | acyl-Co<br>A ligase                                                                                                                                                                                                                                | 3/<br>4           | 10/<br>16            | 0.00<br>213             | 0.03<br>898             | 0.03<br>293             | 80221/51703/11001                                | 3 |

|        |                        |                                                                                        |                        |                       |                         |                         |                         |                                                                                                         |        |
|--------|------------------------|----------------------------------------------------------------------------------------|------------------------|-----------------------|-------------------------|-------------------------|-------------------------|---------------------------------------------------------------------------------------------------------|--------|
|        | 399<br>6               | activity                                                                               | 6<br>6                 | 96<br>9               | 814<br>4                | 549<br>9                | 492<br>6                |                                                                                                         |        |
| M<br>F | GO:<br>007<br>069<br>6 | transme<br>mbrane<br>receptor<br>protein<br>serine/t<br>hreonin<br>e kinase<br>binding | 3/<br>4<br>6<br>6      | 10/<br>16<br>96<br>9  | 0.00<br>213<br>814<br>4 | 0.03<br>898<br>549<br>9 | 0.03<br>293<br>492<br>6 | 650/651/4091                                                                                            | 3      |
| M<br>F | GO:<br>007<br>033<br>0 | aromata<br>se<br>activity                                                              | 4/<br>4<br>6<br>6      | 21/<br>16<br>96<br>9  | 0.00<br>231<br>789<br>2 | 0.04<br>089<br>958      | 0.03<br>455<br>194      | 1551/1580/66002/11283                                                                                   | 4      |
| M<br>F | GO:<br>002<br>283<br>8 | substrat<br>e-specifi<br>c<br>channel<br>activity                                      | 1<br>9/<br>4<br>6<br>6 | 33<br>8/1<br>69<br>69 | 0.00<br>263<br>865<br>7 | 0.04<br>310<br>532<br>9 | 0.03<br>641<br>535<br>5 | 8542/774/776/22802/1364/5349/53828/3748/3755/8645/3783/3784/168507/6338/6340<br>/6563/83959/57156/55503 | 1<br>9 |
| M<br>F | GO:<br>000<br>850<br>9 | anion<br>transme<br>mbrane<br>transpor<br>ter<br>activity                              | 1<br>5/<br>4<br>6<br>6 | 24<br>0/1<br>69<br>69 | 0.00<br>269<br>014<br>4 | 0.04<br>310<br>532<br>9 | 0.03<br>641<br>535<br>5 | 8714/8542/5205/634/22802/1364/5349/84879/6566/80736/83959/113278/55117/6532/<br>28234                   | 1<br>5 |
| M<br>F | GO:<br>190<br>161<br>8 | organic<br>hydroxy<br>compou<br>nd<br>transme<br>mbrane<br>transpor<br>ter<br>activity | 5/<br>4<br>6<br>6      | 36/<br>16<br>96<br>9  | 0.00<br>285<br>435      | 0.04<br>310<br>532<br>9 | 0.03<br>641<br>535<br>5 | 8714/634/6566/6532/28234                                                                                | 5      |
| M<br>F | GO:<br>004<br>329      | glutathi<br>one<br>binding                                                             | 3/<br>4<br>6           | 11/<br>16<br>96       | 0.00<br>288<br>035      | 0.04<br>310<br>532      | 0.03<br>641<br>535      | 2947/2948/4257                                                                                          | 3      |

|        | 5                      |                                                                                                                                 | 6                      | 9                     | 1                       | 9                       | 5                       |                                                                                     |        |
|--------|------------------------|---------------------------------------------------------------------------------------------------------------------------------|------------------------|-----------------------|-------------------------|-------------------------|-------------------------|-------------------------------------------------------------------------------------|--------|
| M<br>F | GO:<br>001<br>507<br>7 | monovalent<br>inorganic<br>cation<br>transmembrane<br>transporter<br>activity                                                   | 1<br>6/<br>4<br>6<br>6 | 26<br>6/1<br>69<br>69 | 0.00<br>289<br>034<br>3 | 0.04<br>310<br>532<br>9 | 0.03<br>641<br>535<br>5 | 480/1528/53828/3748/3755/8645/3783/3784/6338/6340/6564/81031/83959/60482/55117/6532 | 1<br>6 |
| M<br>F | GO:<br>001<br>661<br>6 | oxidoreductase<br>activity,<br>acting<br>on the<br>CH-OH<br>group of<br>donors,<br>NAD or<br>NADP<br>as<br>acceptor             | 9/<br>4<br>6<br>6      | 10<br>8/1<br>69<br>69 | 0.00<br>291<br>571<br>7 | 0.04<br>310<br>532<br>9 | 0.03<br>641<br>535<br>5 | 1646/8644/650/10202/9249/3248/3294/3417/195814                                      | 9      |
| M<br>F | GO:<br>001<br>671<br>2 | oxidoreductase<br>activity,<br>acting<br>on<br>paired<br>donors,<br>with<br>incorporation<br>or<br>reduction<br>of<br>molecules | 4/<br>4<br>6<br>6      | 23/<br>16<br>96<br>9  | 0.00<br>328<br>394<br>6 | 0.04<br>727<br>154      | 0.03<br>993<br>496<br>7 | 1551/1580/66002/11283                                                               | 4      |

|        |                        |                                                                                                 |                   |                       |                         |                         |                         |                                                   |   |
|--------|------------------------|-------------------------------------------------------------------------------------------------|-------------------|-----------------------|-------------------------|-------------------------|-------------------------|---------------------------------------------------|---|
|        |                        | ar oxygen, reduced flavin or flavoprotein as one donor, and incorporation of one atom of oxygen |                   |                       |                         |                         |                         |                                                   |   |
| M<br>F | GO:<br>001<br>529<br>3 | symporter activity                                                                              | 9/<br>4<br>6<br>6 | 11<br>2/1<br>69<br>69 | 0.00<br>372<br>224<br>2 | 0.04<br>900<br>501<br>1 | 0.04<br>139<br>940<br>3 | 84879/6564/6566/9121/81031/83959/60482/55117/6532 | 9 |
| M<br>F | GO:<br>000<br>841<br>7 | fucosyltransferase activity                                                                     | 3/<br>4<br>6<br>6 | 12/<br>16<br>96<br>9  | 0.00<br>376<br>272<br>5 | 0.04<br>900<br>501<br>1 | 0.04<br>139<br>940<br>3 | 2525/2528/10690                                   | 3 |
| M<br>F | GO:<br>001<br>512<br>5 | bile acid transmembrane transporter activity                                                    | 3/<br>4<br>6<br>6 | 12/<br>16<br>96<br>9  | 0.00<br>376<br>272<br>5 | 0.04<br>900<br>501<br>1 | 0.04<br>139<br>940<br>3 | 8714/634/28234                                    | 3 |
| M<br>F | GO:<br>190<br>075<br>0 | oligopeptide binding                                                                            | 3/<br>4<br>6<br>6 | 12/<br>16<br>96<br>9  | 0.00<br>376<br>272<br>5 | 0.04<br>900<br>501<br>1 | 0.04<br>139<br>940<br>3 | 2947/2948/4257                                    | 3 |

**eTable 11.** Gene Ontology Pathway Enrichment Analysis of Immune-Dysfunctional Class in IMvigor210 Trial

| O<br>n<br>t<br>o<br>l<br>o<br>g<br>y | ID         | Description                        | Gene<br>ratio | Bg<br>ratio | P<br>va<br>lu<br>e | P<br>ad<br>ju<br>st | Q value  | Gene ID                                                                                                                                                                                                                                                                                                                                                                                                                                                                                                                                                                  | C<br>o<br>u<br>n<br>t |
|--------------------------------------|------------|------------------------------------|---------------|-------------|--------------------|---------------------|----------|--------------------------------------------------------------------------------------------------------------------------------------------------------------------------------------------------------------------------------------------------------------------------------------------------------------------------------------------------------------------------------------------------------------------------------------------------------------------------------------------------------------------------------------------------------------------------|-----------------------|
| B<br>P                               | GO:0042110 | T cell activation                  | 102/926       | 443/17913   | 6.98E-39           | 3.54E-35            | 2.61E-35 | 100/199/301/54518/384/6363/6347/6366/6352/729230/1236/911/914/30835/939/29126/940/915/916/917/960/923/972/941/942/925/1021/64581/11151/1378/1493/1525/56603/1794/1803/1958/1960/8320/2213/10875/10457/1880/84868/3109/3113/3115/3383/29851/3620/3481/3594/3553/3559/3569/3575/3662/3683/3702/3718/120425/3902/54900/3932/3936/10859/10288/11006/4063/4478/3071/197358/114548/64127/5027/5063/80380/5293/5294/26279/639/5588/26191/5788/5880/10125/9750/91543/860/54440/55423/114836/6556/11005/9840/387357/8600/10673/7409/7412/11326/7454/7535                          | 102                   |
| B<br>P                               | GO:002694  | regulation of leukocyte activation | 106/926       | 492/17913   | 1.32E-37           | 3.34E-34            | 2.47E-34 | 100/30817/199/301/384/55024/695/712/728/6363/6347/6366/6348/6352/729230/1236/930/914/30835/933/939/29126/940/952/916/923/972/941/8832/942/11151/1378/1493/56603/1803/1960/2207/2213/115352/10457/1880/84868/3109/3113/3115/3134/3162/29851/3620/3481/22806/3594/3553/9173/3559/133396/90865/3569/3575/3662/3684/3689/3718/3902/54900/3932/10859/10288/11006/120892/4332/51237/3071/150372/114548/64127/8013/5063/80380/639/5588/26191/5788/5880/10125/9750/64092/54440/55423/56833/6622/11005/26228/6812/9840/10333/7128/8600/10673/9760/54209/7305/7409/7412/11326/7535 | 106                   |
| B<br>P                               | GO:0007159 | leukocyte cell-cell adhesion       | 84/926        | 328/17913   | 9.52E-36           | 1.61E-32            | 1.19E-32 | 100/119/84830/199/301/384/655/6363/6347/6366/6352/729230/1236/30835/939/29126/940/916/960/923/972/941/942/10332/11151/1493/1803/1960/2213/83706/2650/10457/84868/3109/3113/3115/3383/29851/3620/3481/3594/3553/3559/3569/3575/3676/3683/3689/3718/3902/54900/3932/10859/10288/11006/4478/3071/114548/64127/8013/4907/5063/80380/                                                                                                                                                                                                                                         | 84                    |



|        |                |                                                      |            |               |                      |                      |          |                                                                                                                                                                                                                                                                                                                                                                                                                                                                                             |        |
|--------|----------------|------------------------------------------------------|------------|---------------|----------------------|----------------------|----------|---------------------------------------------------------------------------------------------------------------------------------------------------------------------------------------------------------------------------------------------------------------------------------------------------------------------------------------------------------------------------------------------------------------------------------------------------------------------------------------------|--------|
|        |                |                                                      |            |               |                      |                      |          | 50512/5588/26191/5788/5880/10125/9750/6279/54440/6401/6402/6403/6404/55423/9840/8600/10673/7409/7412/11326/7535                                                                                                                                                                                                                                                                                                                                                                             |        |
| B<br>P | GO:00<br>51249 | regulation of<br>lymphocyte<br>activation            | 87/92<br>6 | 401/1791<br>3 | 3.<br>72<br>E-<br>31 | 4.<br>71<br>E-<br>28 | 3.48E-28 | 100/199/301/384/55024/695/6363/6347/6366/6352/729230/1236/930/914/30835/933/939/29126/940/952/916/923/972/941/942/11151/1378/1493/56603/1803/1960/2213/115352/10457/1880/84868/3109/3113/3115/3134/29851/3620/3481/22806/3594/3553/3559/3569/3575/3662/3718/3902/54900/3932/10859/10288/11006/4332/51237/3071/150372/114548/64127/5063/80380/639/5588/26191/5788/5880/10125/9750/64092/54440/55423/56833/11005/9840/7128/8600/10673/9760/7305/7409/7412/11326/7535                          | 8<br>7 |
| B<br>P | GO:00<br>50867 | positive<br>regulation of<br>cell<br>activation      | 77/92<br>6 | 319/1791<br>3 | 6.<br>17<br>E-<br>31 | 6.<br>25<br>E-<br>28 | 4.62E-28 | 100/199/301/695/712/6363/6347/6366/6348/6352/729230/1236/914/30835/939/29126/940/952/916/923/972/941/942/11151/1493/1803/1960/2207/115352/1880/84868/3109/3113/3115/3134/29851/3481/3594/3553/9173/3559/90865/3569/3575/3684/3689/3932/353514/10859/10288/11006/120892/3071/114548/64127/8013/5063/80380/5341/5588/5788/10125/54440/6403/55423/26228/6812/9840/10333/8600/10673/9760/54209/7305/7409/7412/7535                                                                              | 7<br>7 |
| B<br>P | GO:00<br>50900 | leukocyte<br>migration                               | 93/92<br>6 | 467/1791<br>3 | 3.<br>36<br>E-<br>30 | 2.<br>83<br>E-<br>27 | 2.09E-27 | 100/119/30817/84830/199/301/719/728/6357/6363/6347/6364/6366/6348/6351/6352/729230/1236/914/960/962/972/8832/9023/11151/1441/1525/3627/6373/10563/3576/3577/7852/1843/1906/2207/2358/2650/2817/2838/1880/2995/3055/3162/3383/3603/90865/3569/3675/3676/3680/3683/3684/3687/3689/120425/3512/3897/3932/4318/4354/4478/64005/3071/4973/11240/5142/5293/5294/7941/50512/5800/5880/5979/9750/6279/6401/6402/6403/6404/140885/55423/56833/9056/124976/26228/8600/54210/54209/7409/7412/7422/7535 | 9<br>3 |
| B<br>P | GO:00<br>02696 | positive<br>regulation of<br>leukocyte<br>activation | 74/92<br>6 | 305/1791<br>3 | 6.<br>46<br>E-<br>30 | 4.<br>68<br>E-<br>27 | 3.45E-27 | 100/199/301/695/712/6363/6347/6366/6348/6352/729230/1236/914/30835/939/29126/940/952/916/923/972/941/942/11151/1493/1803/1960/2207/115352/1880/84868/3109/3113/3115/3134/29851/3481/3594/3553/9173/3559/90865/3569/3575/3684/3689/3932/10859/10288/11006/120892/3071/114548/64127/8013/5063/80380/5588/5788/10125/54440/55423/26228/6812/9840/10333/8600/10673/9760/54209/7305/7409/7412/7535                                                                                               | 7<br>4 |

|        |                |                                                                 |            |               |                      |                      |          |                                                                                                                                                                                                                                                                                                                                                                                                                                                                                                             |        |
|--------|----------------|-----------------------------------------------------------------|------------|---------------|----------------------|----------------------|----------|-------------------------------------------------------------------------------------------------------------------------------------------------------------------------------------------------------------------------------------------------------------------------------------------------------------------------------------------------------------------------------------------------------------------------------------------------------------------------------------------------------------|--------|
| B<br>P | GO:00<br>02521 | leukocyte<br>differentiation                                    | 94/92<br>6 | 485/1791<br>3 | 1.<br>46<br>E-<br>29 | 9.<br>27<br>E-<br>27 | 6.84E-27 | 100/222487/301/695/714/6363/6348/729230/1236/135228/930/914/939/940/915/916/972/973/941/942/1021/1378/1380/1436/1493/56603/55619/139818/1794/1958/1960/8320/2124/2207/2213/115352/2322/1880/3059/9734/3428/10320/22806/3594/3559/133396/3569/3575/3662/3676/9452/3718/3725/3902/3932/10859/10288/11006/4057/4063/4318/931/3071/150372/114548/5293/8544/26279/23228/639/26191/5788/10125/91543/860/54440/114836/56833/6688/11005/9840/387357/7097/55365/28959/8600/9760/54209/7305/10537/7409/7412/7422/7535 | 9<br>4 |
| B<br>P | GO:19<br>03037 | regulation of<br>leukocyte<br>cell-cell<br>adhesion             | 69/92<br>6 | 295/1791<br>3 | 6.<br>29<br>E-<br>27 | 3.<br>54<br>E-<br>24 | 2.62E-24 | 100/84830/199/301/384/6363/6347/6366/6352/729230/1236/30835/939/29126/940/916/960/923/972/941/942/11151/1493/1803/1960/2213/10457/84868/3109/3113/3115/3383/29851/3620/3481/3594/3553/3559/3569/3575/3676/3689/3718/3902/54900/3932/10859/10288/11006/3071/114548/64127/8013/5063/80380/5588/26191/5788/10125/9750/54440/55423/9840/8600/10673/7409/7412/11326/7535                                                                                                                                         | 6<br>9 |
| B<br>P | GO:00<br>50863 | regulation of<br>T cell<br>activation                           | 70/92<br>6 | 307/1791<br>3 | 1.<br>37<br>E-<br>26 | 6.<br>95<br>E-<br>24 | 5.13E-24 | 100/199/301/384/6363/6347/6366/6352/729230/1236/914/30835/939/29126/940/916/923/972/941/942/11151/1378/1493/56603/1803/1960/2213/10457/84868/3109/3113/3115/29851/3620/3481/3594/3553/3559/3569/3575/3662/3718/3902/54900/3932/10859/10288/11006/3071/114548/64127/5063/80380/639/5588/26191/5788/5880/10125/9750/54440/55423/11005/9840/8600/10673/7409/7412/11326/7535                                                                                                                                    | 7<br>0 |
| B<br>P | GO:00<br>30098 | lymphocyte<br>differentiation                                   | 72/92<br>6 | 325/1791<br>3 | 1.<br>68<br>E-<br>26 | 7.<br>74<br>E-<br>24 | 5.71E-24 | 100/222487/301/695/6363/729230/1236/930/914/939/940/915/916/972/973/941/942/1021/1378/1380/1493/56603/55619/139818/1794/1958/1960/8320/2213/115352/2322/1880/9734/10320/22806/3594/3559/3569/3575/3662/3676/9452/3718/3902/3932/10288/11006/4063/931/3071/150372/114548/5293/26279/23228/639/26191/5788/10125/91543/860/54440/114836/56833/6688/11005/9840/387357/9760/7409/7412/7535                                                                                                                       | 7<br>2 |
| B<br>P | GO:19<br>03039 | positive<br>regulation of<br>leukocyte<br>cell-cell<br>adhesion | 58/92<br>6 | 214/1791<br>3 | 2.<br>45<br>E-<br>26 | 1.<br>04<br>E-<br>23 | 7.64E-24 | 100/199/301/6363/6347/6366/6352/729230/1236/30835/939/29126/940/916/960/923/972/941/942/11151/1493/1803/1960/84868/3109/3113/3115/3383/29851/3481/3594/3553/3559/3569/3575/3676/3689/3932/10859/10288/11006/3071/114548/64127/8013/5063/80380/5588/5788/10125/54440/55423/9840/8600/10673/7409/7412/7535                                                                                                                                                                                                    | 5<br>8 |

|        |                |                                                     |            |               |                      |                      |          |                                                                                                                                                                                                                                                                                                                                                                                                                                                                                          |        |
|--------|----------------|-----------------------------------------------------|------------|---------------|----------------------|----------------------|----------|------------------------------------------------------------------------------------------------------------------------------------------------------------------------------------------------------------------------------------------------------------------------------------------------------------------------------------------------------------------------------------------------------------------------------------------------------------------------------------------|--------|
| B<br>P | GO:00<br>70661 | leukocyte<br>proliferation                          | 65/92<br>6 | 270/1791<br>3 | 3.<br>51<br>E-<br>26 | 1.<br>37<br>E-<br>23 | 1.01E-23 | 100/199/301/384/695/6363/6352/729230/930/30835/933/291<br>26/940/952/916/923/972/973/11151/1380/1436/1493/1794/2<br>213/115352/2322/10457/1880/84868/3109/3113/3115/3620/<br>3481/22806/3594/3553/3559/90865/3569/3575/10859/10288<br>/4332/931/4478/51237/3071/5027/80380/5294/23228/5588/2<br>6191/5788/5880/54440/6556/7128/8600/10673/7305/7412/1<br>1326/7535                                                                                                                       | 6<br>5 |
| B<br>P | GO:00<br>34341 | response to<br>interferon-g<br>amma                 | 52/92<br>6 | 173/1791<br>3 | 4.<br>56<br>E-<br>26 | 1.<br>65<br>E-<br>23 | 1.22E-23 | 199/6347/6348/6352/960/4261/1906/2209/2633/115361/115<br>362/3055/3105/3106/3107/3113/3115/3118/3119/3120/3122/<br>3123/3125/3134/3136/3383/10437/8519/10581/10410/3594/<br>3662/3664/3394/4210/4360/4502/84166/4939/8638/140885/<br>6556/6622/9021/6812/7097/10346/11074/7294/10537/7412/<br>7454                                                                                                                                                                                       | 5<br>2 |
| B<br>P | GO:00<br>22409 | positive<br>regulation of<br>cell-cell<br>adhesion  | 62/92<br>6 | 251/1791<br>3 | 1.<br>13<br>E-<br>25 | 3.<br>83<br>E-<br>23 | 2.83E-23 | 100/8728/199/301/655/6363/6347/6366/6352/729230/1236/3<br>0835/939/29126/940/916/960/923/972/941/942/11151/1493/<br>10563/1803/1960/2651/84868/3109/3113/3115/3383/29851/<br>3481/3594/3553/3559/3569/3575/3676/3689/3932/10859/10<br>288/11006/3071/114548/64127/8013/5063/80380/5588/5788<br>/10125/54440/55423/9840/8600/10673/7409/7412/7535                                                                                                                                         | 6<br>2 |
| B<br>P | GO:00<br>01819 | positive<br>regulation of<br>cytokine<br>production | 84/92<br>6 | 446/1791<br>3 | 1.<br>39<br>E-<br>25 | 4.<br>21<br>E-<br>23 | 3.10E-23 | 150/199/9447/301/330/718/719/728/147372/6363/6348/7292<br>30/1236/929/914/29126/940/948/916/923/972/941/942/1436/<br>1536/55601/1958/2069/2207/2219/55612/115362/51704/848<br>68/29923/3113/3115/3134/3162/3304/3620/3428/3594/3595/<br>3553/3556/9173/90865/3569/3662/3394/353514/10859/1028<br>8/4023/120892/4050/4063/23643/4321/150372/22861/11454<br>8/64127/8013/5027/5142/5588/26191/5788/10125/91543/54<br>440/114836/6556/7096/7097/10333/51284/51311/54209/729<br>4/7305/81030 | 8<br>4 |
| B<br>P | GO:00<br>46651 | lymphocyte<br>proliferation                         | 61/92<br>6 | 244/1791<br>3 | 1.<br>41<br>E-<br>25 | 4.<br>21<br>E-<br>23 | 3.10E-23 | 100/199/301/384/695/6363/6352/729230/930/30835/933/291<br>26/940/952/916/923/972/973/11151/1380/1493/1794/2213/1<br>15352/2322/10457/1880/84868/3109/3113/3115/3620/3481/<br>22806/3594/3553/3559/3569/3575/10859/10288/4332/931/4<br>478/51237/3071/5027/80380/5294/23228/5588/26191/5788/<br>5880/54440/6556/10673/7305/7412/11326/7535                                                                                                                                                | 6<br>1 |
| B<br>P | GO:00<br>32943 | mononuclea<br>r cell<br>proliferation               | 61/92<br>6 | 246/1791<br>3 | 2.<br>26<br>E-       | 6.<br>38<br>E-       | 4.71E-23 | 100/199/301/384/695/6363/6352/729230/930/30835/933/291<br>26/940/952/916/923/972/973/11151/1380/1493/1794/2213/1<br>15352/2322/10457/1880/84868/3109/3113/3115/3620/3481/                                                                                                                                                                                                                                                                                                                | 6<br>1 |

|        |                |                                                                            |            |               |                      |                      |          |                                                                                                                                                                                                                                                                                                                                                                                                                           |        |
|--------|----------------|----------------------------------------------------------------------------|------------|---------------|----------------------|----------------------|----------|---------------------------------------------------------------------------------------------------------------------------------------------------------------------------------------------------------------------------------------------------------------------------------------------------------------------------------------------------------------------------------------------------------------------------|--------|
|        |                |                                                                            |            |               | 25                   | 23                   |          | 22806/3594/3553/3559/3569/3575/10859/10288/4332/931/478/51237/3071/5027/80380/5294/23228/5588/26191/5788/5880/54440/6556/10673/7305/7412/11326/7535                                                                                                                                                                                                                                                                       |        |
| B<br>P | GO:00<br>22407 | regulation of<br>cell-cell<br>adhesion                                     | 77/92<br>6 | 389/1791<br>3 | 6.<br>08<br>E-<br>25 | 1.<br>62<br>E-<br>22 | 1.20E-22 | 100/8728/84830/199/301/384/655/6363/6347/6366/6352/729230/1236/30835/939/29126/940/916/960/923/972/941/942/999/1952/11151/1493/10563/1803/1960/2213/83706/2651/10457/84868/3109/3113/3115/3383/29851/3620/3481/3594/3553/3559/3569/3575/3676/3689/3718/3902/54900/3932/10859/10288/11006/266727/3071/114548/64127/8013/5063/80380/5588/26191/5788/10125/9750/54440/55423/9840/8600/10673/7409/7412/11326/7535             | 7<br>7 |
| B<br>P | GO:00<br>02697 | regulation of<br>immune<br>effector<br>process                             | 81/92<br>6 | 441/1791<br>3 | 5.<br>93<br>E-<br>24 | 1.<br>50<br>E-<br>21 | 1.11E-21 | 30817/9447/301/330/695/712/713/714/717/718/719/720/721/728/730/6363/729230/930/933/940/948/972/941/8832/942/10225/629/3426/1378/1380/55601/1776/2207/2208/2213/115352/10875/51704/84868/51191/3109/3134/3162/3434/3594/3553/3559/90865/3569/3575/11213/3662/3684/3689/3718/5650/3902/10859/4321/51237/114548/64127/8013/5027/5788/5880/10125/91543/54440/5272/710/4068/114836/56833/11005/6812/55061/7128/7409/11326/7454 | 8<br>1 |
| B<br>P | GO:00<br>50870 | positive<br>regulation of<br>T cell<br>activation                          | 53/92<br>6 | 198/1791<br>3 | 6.<br>97<br>E-<br>24 | 1.<br>68<br>E-<br>21 | 1.24E-21 | 100/199/301/6363/6347/6366/6352/729230/1236/30835/939/29126/940/916/923/972/941/942/11151/1493/1803/1960/84868/3109/3113/3115/29851/3481/3594/3553/3559/3569/3575/3932/10859/10288/11006/3071/114548/64127/5063/80380/5880/5788/10125/54440/55423/9840/8600/10673/7409/7412/7535                                                                                                                                          | 5<br>3 |
| B<br>P | GO:00<br>51251 | positive<br>regulation of<br>lymphocyte<br>activation                      | 60/92<br>6 | 258/1791<br>3 | 2.<br>08<br>E-<br>23 | 4.<br>79<br>E-<br>21 | 3.54E-21 | 100/199/301/695/6363/6347/6366/6352/729230/1236/30835/939/29126/940/952/916/923/972/941/942/11151/1493/1803/1960/115352/1880/84868/3109/3113/3115/3134/29851/3481/3594/3553/3559/3569/3575/3932/10859/10288/11006/3071/114548/64127/5063/80380/5588/5788/10125/54440/55423/9840/8600/10673/9760/7305/7409/7412/7535                                                                                                       | 6<br>0 |
| B<br>P | GO:00<br>02768 | immune<br>response-re<br>gulating cell<br>surface<br>receptor<br>signaling | 78/92<br>6 | 434/1791<br>3 | 1.<br>75<br>E-<br>22 | 3.<br>86<br>E-<br>20 | 2.85E-20 | 100/640/695/719/728/1236/930/30835/933/919/952/915/916/917/973/10462/1378/1380/1493/26999/9844/2207/2209/2212/2213/2214/2219/115352/2358/2533/2633/3055/3113/3115/3118/3119/3120/3122/3123/3125/3702/3725/89857/54900/3932/3937/10859/10288/11006/4332/931/94025/4583/64005/3071/150372/8013/5063/5079/5142/5293/23228/5579/5588/                                                                                         | 7<br>8 |

|        |                |                                                                                       |            |               |                      |                      |          |                                                                                                                                                                                                                                                                                                                                                                                        |        |
|--------|----------------|---------------------------------------------------------------------------------------|------------|---------------|----------------------|----------------------|----------|----------------------------------------------------------------------------------------------------------------------------------------------------------------------------------------------------------------------------------------------------------------------------------------------------------------------------------------------------------------------------------------|--------|
|        |                | pathway                                                                               |            |               |                      |                      |          | 5696/5698/26191/5788/26228/9840/387357/9473/50852/7294/7409/7454/7456/7535                                                                                                                                                                                                                                                                                                             |        |
| B<br>P | GO:00<br>60326 | cell<br>chemotaxis                                                                    | 58/92<br>6 | 253/1791<br>3 | 2.<br>48<br>E-<br>22 | 5.<br>23<br>E-<br>20 | 3.86E-20 | 30817/199/301/51411/719/728/6357/6363/6347/6364/6366/6348/6351/6352/729230/1236/972/9023/11151/1441/1525/3627/6373/10563/3576/3577/7852/1843/1906/1960/2358/1880/1839/3603/3569/3680/3689/120425/4354/3071/3164/11240/5142/5293/5294/7941/5365/5588/5800/5880/9750/6279/56833/26228/8600/7409/7412/7422                                                                                | 5<br>8 |
| B<br>P | GO:00<br>45785 | positive<br>regulation of<br>cell<br>adhesion                                         | 73/92<br>6 | 388/1791<br>3 | 2.<br>58<br>E-<br>22 | 5.<br>23<br>E-<br>20 | 3.86E-20 | 100/8728/199/301/54518/655/6363/6347/6366/6352/729230/1236/30835/939/29126/940/948/916/960/923/972/941/942/1021/11151/1493/10563/1803/1960/55612/342184/2651/84868/3109/3113/3115/3383/29851/3481/3594/3553/3559/3569/3575/3675/3676/3689/3932/10859/10288/11006/3071/114548/64127/8013/5063/80380/5588/5788/10125/5979/6281/54440/55423/9806/9840/7052/8600/10673/7409/7412/7422/7535 | 7<br>3 |
| B<br>P | GO:00<br>71346 | cellular<br>response to<br>interferon-g<br>amma                                       | 45/92<br>6 | 153/1791<br>3 | 2.<br>74<br>E-<br>22 | 5.<br>33<br>E-<br>20 | 3.94E-20 | 199/6347/6348/6352/960/4261/1906/2209/2633/115361/115362/3055/3105/3106/3107/3113/3115/3118/3119/3120/3122/3123/3125/3134/3136/3383/10437/3594/3662/3664/3394/4360/4502/84166/4939/8638/140885/9021/6812/7097/10346/11074/7294/7412/7454                                                                                                                                               | 4<br>5 |
| B<br>P | GO:00<br>02429 | immune<br>response-ac<br>tivating cell<br>surface<br>receptor<br>signaling<br>pathway | 74/92<br>6 | 399/1791<br>3 | 3.<br>22<br>E-<br>22 | 6.<br>04<br>E-<br>20 | 4.46E-20 | 100/640/695/719/728/1236/930/30835/933/919/952/915/916/917/973/10462/1378/1380/1493/26999/9844/2207/2209/2212/2213/2214/2219/115352/2533/2633/3055/3113/3115/3118/3119/3120/3122/3123/3125/3702/89857/54900/3932/3937/11006/4332/931/94025/4583/64005/3071/150372/8013/5063/5079/5142/5293/23228/5579/5588/5696/5698/26191/5788/26228/9840/387357/9473/50852/7294/7409/7454/7456/7535  | 7<br>4 |
| B<br>P | GO:00<br>50851 | antigen<br>receptor-me<br>diated<br>signaling<br>pathway                              | 54/92<br>6 | 224/1791<br>3 | 5.<br>78<br>E-<br>22 | 1.<br>05<br>E-<br>19 | 7.72E-20 | 100/640/695/1236/930/933/919/952/915/916/917/973/1493/2213/115352/2533/2633/3113/3115/3118/3119/3120/3122/3123/3125/3702/89857/54900/3932/3937/11006/4332/931/3071/150372/5063/5079/5142/5293/23228/5579/5588/5696/5698/26191/5788/26228/9840/387357/9473/50852/7294/7454/7535                                                                                                         | 5<br>4 |
| B<br>P | GO:00<br>30595 | leukocyte<br>chemotaxis                                                               | 49/92<br>6 | 188/1791<br>3 | 1.<br>28<br>E-<br>21 | 2.<br>23<br>E-<br>19 | 1.65E-19 | 30817/199/301/719/728/6357/6363/6347/6366/6348/6351/6352/729230/1236/972/9023/11151/1441/1525/3627/6373/10563/3576/3577/7852/1843/1906/2358/1880/3603/3569/3680/3689/120425/4354/3071/11240/5142/5293/5294/7941/5800/5                                                                                                                                                                 | 4<br>9 |

|        |                |                                                                  |            |               |                      |                      |          |                                                                                                                                                                                                                                                                                                                                                                                                                                                           |        |
|--------|----------------|------------------------------------------------------------------|------------|---------------|----------------------|----------------------|----------|-----------------------------------------------------------------------------------------------------------------------------------------------------------------------------------------------------------------------------------------------------------------------------------------------------------------------------------------------------------------------------------------------------------------------------------------------------------|--------|
|        |                |                                                                  |            |               |                      |                      |          | 880/9750/6279/56833/26228/8600/7409                                                                                                                                                                                                                                                                                                                                                                                                                       |        |
| B<br>P | GO:00<br>50727 | regulation of<br>inflammatory<br>response                        | 81/92<br>6 | 479/1791<br>3 | 1.<br>45<br>E-<br>21 | 2.<br>46<br>E-<br>19 | 1.81E-19 | 54/100/113/301/348/330/695/712/713/714/717/718/719/720/<br>721/728/730/6348/6352/729230/1236/930/940/923/629/3426<br>/1378/1380/1776/2099/2207/2213/2358/115362/51704/3055/<br>3620/3553/7850/9173/3559/90865/3569/3684/3689/353514/<br>4023/120892/4210/4318/197358/22861/114548/64127/4907/<br>26471/9180/5187/118788/5294/7941/5788/6279/6401/710/8<br>9790/140885/56833/6622/9021/26228/55061/7052/81793/70<br>97/10333/51284/7128/8600/54209/11326   | 8<br>1 |
| B<br>P | GO:00<br>32103 | positive<br>regulation of<br>response to<br>external<br>stimulus | 63/92<br>6 | 315/1791<br>3 | 7.<br>90<br>E-<br>21 | 1.<br>29<br>E-<br>18 | 9.53E-19 | 199/695/712/718/719/728/6363/6366/6348/6351/6352/72923<br>0/1233/1236/4064/940/923/972/3627/10563/3576/7852/5560<br>1/1906/2152/2207/2358/115362/51704/84868/3620/3603/35<br>53/9173/90865/3569/3684/3689/5650/353514/4023/120892/<br>23643/3071/64127/26471/9180/5294/7941/5880/9750/6279/<br>6622/26228/7052/81793/7097/10333/51284/8600/54209/347<br>733/7422                                                                                          | 6<br>3 |
| B<br>P | GO:00<br>02683 | negative<br>regulation of<br>immune<br>system<br>process         | 77/92<br>6 | 451/1791<br>3 | 8.<br>43<br>E-<br>21 | 1.<br>33<br>E-<br>18 | 9.85E-19 | 100/84830/301/384/55024/695/714/6347/6366/6348/729230/<br>929/933/29126/972/8832/10225/1021/1378/1493/1843/2207/<br>2213/115352/127943/10875/2633/10457/29909/84868/8361/<br>3112/3134/3162/3218/3620/3428/9173/3559/133396/90865/<br>3575/11213/3662/3718/3902/54900/10859/10288/11006/405<br>7/23643/4321/4332/197358/84166/11240/80380/23228/2619<br>1/5788/9750/64092/5272/710/56833/6662/11005/26228/103<br>33/55365/28959/7128/1831/7305/11326/7538 | 7<br>7 |
| B<br>P | GO:00<br>50670 | regulation of<br>lymphocyte<br>proliferation                     | 49/92<br>6 | 199/1791<br>3 | 1.<br>82<br>E-<br>20 | 2.<br>80<br>E-<br>18 | 2.07E-18 | 100/199/301/384/695/6363/6352/729230/30835/933/29126/9<br>40/952/916/923/972/11151/1493/2213/115352/10457/1880/8<br>4868/3109/3113/3115/3620/3481/22806/3594/3553/3559/35<br>69/10859/10288/4332/51237/3071/80380/5588/26191/5788/<br>5880/54440/10673/7305/7412/11326/7535                                                                                                                                                                               | 4<br>9 |
| B<br>P | GO:00<br>32944 | regulation of<br>mononuclear<br>cell<br>proliferation            | 49/92<br>6 | 200/1791<br>3 | 2.<br>30<br>E-<br>20 | 3.<br>42<br>E-<br>18 | 2.53E-18 | 100/199/301/384/695/6363/6352/729230/30835/933/29126/9<br>40/952/916/923/972/11151/1493/2213/115352/10457/1880/8<br>4868/3109/3113/3115/3620/3481/22806/3594/3553/3559/35<br>69/10859/10288/4332/51237/3071/80380/5588/26191/5788/<br>5880/54440/10673/7305/7412/11326/7535                                                                                                                                                                               | 4<br>9 |
| B<br>P | GO:00<br>02237 | response to<br>molecule of<br>bacterial                          | 61/92<br>6 | 309/1791<br>3 | 6.<br>64<br>E-       | 9.<br>62<br>E-       | 7.10E-18 | 54/249/27063/721/728/6347/6348/6352/1236/929/4064/948/<br>923/10225/1439/3627/2920/3576/1906/2213/84868/3055/33<br>83/3620/3587/3595/3553/11009/3569/11213/3394/8564/108                                                                                                                                                                                                                                                                                  | 6<br>1 |

|        |                |                                                                                                                                                                    |            |               |                      |                      |          |                                                                                                                                                                                                                                                                                                     |        |
|--------|----------------|--------------------------------------------------------------------------------------------------------------------------------------------------------------------|------------|---------------|----------------------|----------------------|----------|-----------------------------------------------------------------------------------------------------------------------------------------------------------------------------------------------------------------------------------------------------------------------------------------------------|--------|
|        |                | origin                                                                                                                                                             |            |               | 20                   | 18                   |          | 59/10288/4057/23643/4129/4360/114548/64127/389643/5027/5142/10891/26191/6279/6401/6403/140885/6556/6622/26228/7035/7054/7096/7097/10333/7128/54209/7412/7538                                                                                                                                        |        |
| B<br>P | GO:00<br>70663 | regulation of<br>leukocyte<br>proliferation                                                                                                                        | 50/92<br>6 | 214/1791<br>3 | 8.<br>55<br>E-<br>20 | 1.<br>20<br>E-<br>17 | 8.88E-18 | 100/199/301/384/695/6363/6352/729230/30835/933/29126/940/952/916/923/972/11151/1493/2213/115352/10457/1880/84868/3109/3113/3115/3620/3481/22806/3594/3553/3559/3569/10859/10288/4332/51237/3071/80380/5588/26191/5788/5880/54440/7128/10673/7305/7412/11326/7535                                    | 5<br>0 |
| B<br>P | GO:00<br>02460 | adaptive<br>immune<br>response<br>based on<br>somatic<br>recombinati<br>on of<br>immune<br>receptors<br>built from<br>immunoglob<br>ulin<br>superfamily<br>domains | 58/92<br>6 | 295/1791<br>3 | 6.<br>82<br>E-<br>19 | 9.<br>34<br>E-<br>17 | 6.89E-17 | 100/301/695/712/713/714/717/718/720/721/730/6363/729230/930/939/29126/940/972/941/3426/1378/1380/10563/2207/2208/2213/10875/84868/3119/3134/3383/3594/3553/9173/90865/3569/3575/3662/3718/89857/10859/4063/64005/114548/5027/5551/5588/5788/91543/54440/710/114836/6556/55061/51311/7128/10673/7454 | 5<br>8 |
| B<br>P | GO:00<br>60333 | interferon-g<br>amma-medi<br>ated<br>signaling<br>pathway                                                                                                          | 32/92<br>6 | 91/17913      | 7.<br>98<br>E-<br>19 | 1.<br>06<br>E-<br>16 | 7.86E-17 | 960/4261/2209/2633/3055/3105/3106/3107/3113/3115/3118/3119/3120/3122/3123/3125/3134/3136/3383/10437/3662/3664/3394/4502/84166/4939/8638/9021/10346/11074/7294/7412                                                                                                                                  | 3<br>2 |
| B<br>P | GO:00<br>30217 | T cell<br>differentiatio<br>n                                                                                                                                      | 50/92<br>6 | 234/1791<br>3 | 4.<br>92<br>E-<br>18 | 6.<br>39<br>E-<br>16 | 4.72E-16 | 100/301/6363/729230/1236/914/939/940/915/916/972/941/942/1021/1378/1493/56603/1794/1958/1960/8320/1880/3594/3559/3569/3575/3662/3718/3902/3932/10288/11006/4063/3071/114548/5293/26279/639/26191/5788/10125/91543/860/54440/114836/11005/9840/387357/7409/7535                                      | 5<br>0 |
| B<br>P | GO:00<br>32496 | response to<br>lipopolysacc<br>haride                                                                                                                              | 56/92<br>6 | 295/1791<br>3 | 1.<br>49<br>E-<br>17 | 1.<br>89<br>E-<br>15 | 1.39E-15 | 54/249/27063/728/6347/6348/6352/1236/929/4064/948/923/10225/1439/3627/3576/1906/84868/3055/3383/3620/3587/3595/3553/11009/3569/11213/3394/8564/10859/10288/4057/23643/4129/4360/114548/64127/389643/5027/5142/10891/26191/6279/6401/6403/140885/6556/6622/26228/7035/7054/                          | 5<br>6 |

|        |                |                                                   |            |               |                      |                      |          |                                                                                                                                                                                                                                                                                                                                                                                                                           |        |
|--------|----------------|---------------------------------------------------|------------|---------------|----------------------|----------------------|----------|---------------------------------------------------------------------------------------------------------------------------------------------------------------------------------------------------------------------------------------------------------------------------------------------------------------------------------------------------------------------------------------------------------------------------|--------|
|        |                |                                                   |            |               |                      |                      |          | 7097/7128/54209/7412/7538                                                                                                                                                                                                                                                                                                                                                                                                 |        |
| B<br>P | GO:00<br>97529 | myeloid<br>leukocyte<br>migration                 | 41/92<br>6 | 170/1791<br>3 | 5.<br>50<br>E-<br>17 | 6.<br>80<br>E-<br>15 | 5.02E-15 | 30817/199/301/719/728/6357/6363/6347/6366/6348/6352/72<br>9230/1236/972/1441/1525/3627/3576/1843/1906/2358/3569/<br>3680/3689/120425/4354/3071/5142/5293/5294/7941/5800/5<br>880/9750/6279/140885/56833/26228/8600/54209/7409                                                                                                                                                                                             | 4<br>1 |
| B<br>P | GO:00<br>06909 | phagocytosi<br>s                                  | 56/92<br>6 | 308/1791<br>3 | 1.<br>13<br>E-<br>16 | 1.<br>36<br>E-<br>14 | 1.00E-14 | 575/199/301/306/51411/717/718/720/721/6347/929/919/948/<br>917/64581/11151/26999/1794/9844/2207/2209/2212/2213/2<br>214/2219/2358/3055/3553/3560/3561/3394/3683/3684/3689/<br>8685/4481/64005/4647/4688/4689/3071/5027/5031/5788/58<br>06/140885/6504/6556/26228/7052/7097/54209/7305/7409/7<br>454/7456                                                                                                                  | 5<br>6 |
| B<br>P | GO:00<br>42119 | neutrophil<br>activation                          | 74/92<br>6 | 499/1791<br>3 | 1.<br>69<br>E-<br>16 | 1.<br>99<br>E-<br>14 | 1.47E-14 | 51816/84658/222487/290/306/23526/64333/10396/51411/71<br>8/719/728/6352/929/948/960/963/978/1116/1118/160364/13<br>78/1476/2919/3576/3577/1536/8560/1776/1794/2171/2204/2<br>207/2212/2213/2215/2219/10875/2357/2358/11010/3101/31<br>36/3304/10788/3683/3684/3687/3689/3903/10288/4057/406<br>9/4318/4332/3071/150372/4973/11240/51316/5329/5788/58<br>06/54509/6279/6402/5265/140885/10326/6556/6515/6518/7<br>097/7305 | 7<br>4 |
| B<br>P | GO:00<br>42098 | T cell<br>proliferation                           | 41/92<br>6 | 177/1791<br>3 | 2.<br>55<br>E-<br>16 | 2.<br>94<br>E-<br>14 | 2.17E-14 | 199/301/384/6363/6352/729230/30835/29126/940/916/923/1<br>1151/1493/1794/10457/84868/3109/3113/3115/3620/3481/3<br>594/3553/3559/3569/10859/10288/4478/3071/5027/80380/5<br>294/5588/5788/5880/54440/6556/10673/7412/11326/7535                                                                                                                                                                                           | 4<br>1 |
| B<br>P | GO:19<br>02105 | regulation of<br>leukocyte<br>differentiatio<br>n | 51/92<br>6 | 267/1791<br>3 | 3.<br>27<br>E-<br>16 | 3.<br>68<br>E-<br>14 | 2.72E-14 | 100/301/695/714/6363/6348/729230/914/939/940/972/941/9<br>42/1021/1378/1493/56603/1960/2124/2213/115352/3059/22<br>806/3594/3559/3575/3662/3718/3725/3902/10859/10288/11<br>006/4057/3071/150372/114548/639/5788/10125/54440/5683<br>3/11005/9840/55365/28959/8600/9760/54209/7305/7535                                                                                                                                   | 5<br>1 |
| B<br>P | GO:00<br>45088 | regulation of<br>innate<br>immune<br>response     | 68/92<br>6 | 440/1791<br>3 | 3.<br>59<br>E-<br>16 | 3.<br>96<br>E-<br>14 | 2.92E-14 | 9447/348/330/695/6352/929/30835/948/10225/10462/64581/<br>1378/1514/55601/2069/2099/2207/2213/2219/115352/2358/<br>115362/84868/3055/3134/3304/3428/11213/3662/3684/3689<br>/3902/10859/4057/23643/8685/4321/4332/94025/4583/1973<br>58/84166/64127/5063/118788/5696/5698/26191/149628/101<br>25/91543/6279/5272/710/4068/114836/56833/9021/7096/81<br>793/7097/10333/51284/51311/7128/7294/7409/11326                    | 6<br>8 |
| B      | GO:00          | B cell                                            | 45/92      | 215/1791      | 5.                   | 5.                   | 4.24E-14 | 100/222487/55024/695/930/933/939/940/952/972/973/1380/                                                                                                                                                                                                                                                                                                                                                                    | 4      |



|        |                |                                                               |            |               |                      |                      |          |                                                                                                                                                                                                                                                                                                                                                                                     |        |
|--------|----------------|---------------------------------------------------------------|------------|---------------|----------------------|----------------------|----------|-------------------------------------------------------------------------------------------------------------------------------------------------------------------------------------------------------------------------------------------------------------------------------------------------------------------------------------------------------------------------------------|--------|
| P      | 42113          | activation                                                    | 6          | 3             | 32<br>E-<br>16       | 74<br>E-<br>14       |          | 1493/55619/139818/2213/115350/115352/2322/1880/9734/2806/3569/3575/3676/9452/3718/54900/4332/931/51237/3071/150372/64127/5293/23228/5579/5788/64092/56833/7128/10673/7305/7412/7535                                                                                                                                                                                                 | 5      |
| B<br>P | GO:00<br>02449 | lymphocyte<br>mediated<br>immunity                            | 53/92<br>6 | 293/1791<br>3 | 9.<br>49<br>E-<br>16 | 1.<br>00<br>E-<br>13 | 7.39E-14 | 695/712/713/714/717/718/720/721/730/729230/930/939/940/972/10225/3426/11151/1378/1380/2207/2208/2213/10875/3002/84868/3119/3134/3383/3594/3553/3569/3575/3822/3902/10859/64005/114548/5027/5551/5788/10125/91543/54440/5272/710/4068/114836/57823/6556/55061/51311/7409/7454                                                                                                        | 5<br>3 |
| B<br>P | GO:00<br>19882 | antigen<br>processing<br>and<br>presentation                  | 45/92<br>6 | 220/1791<br>3 | 1.<br>32<br>E-<br>15 | 1.<br>37<br>E-<br>13 | 1.01E-13 | 6363/6366/1236/30835/948/972/925/10332/1514/1536/64167/2209/2213/10875/3105/3106/3107/3108/3109/3112/3113/3115/3118/3119/3120/3122/3123/3125/3134/3136/3383/10437/3902/10288/653361/4688/4689/64127/5696/5698/6556/6890/6891/54209/7454                                                                                                                                             | 4<br>5 |
| B<br>P | GO:00<br>02446 | neutrophil<br>mediated<br>immunity                            | 72/92<br>6 | 499/1791<br>3 | 1.<br>91<br>E-<br>15 | 1.<br>94<br>E-<br>13 | 1.43E-13 | 51816/84658/222487/290/306/23526/64333/10396/51411/718/719/728/929/948/960/963/978/1116/1118/160364/1378/1476/2919/3577/1536/8560/1776/1794/2171/2204/2207/2212/2215/2219/10875/2357/2358/11010/3101/3136/3304/3569/10788/3683/3684/3687/3689/3903/10288/4057/4069/4318/4332/3071/150372/4973/11240/51316/5329/5788/5806/54509/6279/6402/5265/140885/10326/6556/6515/6518/7097/7305 | 7<br>2 |
| B<br>P | GO:00<br>02283 | neutrophil<br>activation<br>involved in<br>immune<br>response | 71/92<br>6 | 488/1791<br>3 | 1.<br>96<br>E-<br>15 | 1.<br>95<br>E-<br>13 | 1.44E-13 | 51816/84658/222487/290/306/23526/64333/10396/51411/718/719/728/929/948/960/963/978/1116/1118/160364/1378/1476/2919/3577/1536/8560/1776/1794/2171/2204/2207/2212/2215/2219/10875/2357/2358/11010/3101/3136/3304/10788/3683/3684/3687/3689/3903/10288/4057/4069/4318/4332/3071/150372/4973/11240/51316/5329/5788/5806/54509/6279/6402/5265/140885/10326/6556/6515/6518/7097/7305      | 7<br>1 |
| B<br>P | GO:00<br>02699 | positive<br>regulation of<br>immune<br>effector<br>process    | 42/92<br>6 | 198/1791<br>3 | 3.<br>09<br>E-<br>15 | 3.<br>01<br>E-<br>13 | 2.22E-13 | 30817/301/695/718/6363/729230/940/948/972/941/8832/942/55601/2207/2208/51704/3109/3134/3162/3594/3553/90865/3569/3684/3689/5650/3902/10859/51237/114548/64127/8013/5027/5788/5880/10125/91543/54440/4068/114836/6812/7409                                                                                                                                                           | 4<br>2 |
| B<br>P | GO:00<br>50671 | positive<br>regulation of<br>lymphocyte                       | 33/92<br>6 | 125/1791<br>3 | 3.<br>64<br>E-       | 3.<br>48<br>E-       | 2.57E-13 | 100/199/301/6363/6352/729230/30835/29126/940/952/916/923/972/11151/115352/1880/84868/3109/3113/3115/3481/3594/3553/3559/3569/10288/3071/5588/5788/54440/10673/74                                                                                                                                                                                                                    | 3<br>3 |

|        |                |                                                                   |            |               |                      |                      |          |                                                                                                                                                                                                                                                                                                                                                                           |        |
|--------|----------------|-------------------------------------------------------------------|------------|---------------|----------------------|----------------------|----------|---------------------------------------------------------------------------------------------------------------------------------------------------------------------------------------------------------------------------------------------------------------------------------------------------------------------------------------------------------------------------|--------|
|        |                | proliferation                                                     |            |               | 15                   | 13                   |          | 12/7535                                                                                                                                                                                                                                                                                                                                                                   |        |
| B<br>P | GO:00<br>42129 | regulation of<br>T cell<br>proliferation                          | 36/92<br>6 | 149/1791<br>3 | 4.<br>20<br>E-<br>15 | 3.<br>94<br>E-<br>13 | 2.91E-13 | 199/301/384/6363/6352/729230/30835/29126/940/916/923/11151/1493/10457/84868/3109/3113/3115/3620/3481/3594/3553/3559/3569/10859/10288/3071/80380/5588/5788/5880/54440/10673/7412/11326/7535                                                                                                                                                                                | 3<br>6 |
| B<br>P | GO:00<br>42102 | positive<br>regulation of<br>T cell<br>proliferation              | 28/92<br>6 | 90/17913      | 4.<br>56<br>E-<br>15 | 4.<br>20<br>E-<br>13 | 3.10E-13 | 199/301/6363/6352/729230/30835/29126/940/916/923/11151/84868/3109/3113/3115/3481/3594/3553/3559/3569/10288/3071/5588/5788/54440/10673/7412/7535                                                                                                                                                                                                                           | 2<br>8 |
| B<br>P | GO:00<br>32946 | positive<br>regulation of<br>mononuclear<br>cell<br>proliferation | 33/92<br>6 | 126/1791<br>3 | 4.<br>69<br>E-<br>15 | 4.<br>20<br>E-<br>13 | 3.10E-13 | 100/199/301/6363/6352/729230/30835/29126/940/952/916/923/972/11151/115352/1880/84868/3109/3113/3115/3481/3594/3553/3559/3569/10288/3071/5588/5788/54440/10673/7412/7535                                                                                                                                                                                                   | 3<br>3 |
| B<br>P | GO:00<br>43312 | neutrophil<br>degranulation                                       | 70/92<br>6 | 485/1791<br>3 | 4.<br>72<br>E-<br>15 | 4.<br>20<br>E-<br>13 | 3.10E-13 | 51816/84658/222487/290/306/23526/64333/10396/51411/718/719/728/929/948/960/963/978/1116/1118/160364/1378/1476/2919/3577/1536/8560/1794/2171/2204/2207/2212/2215/2219/10875/2357/2358/11010/3101/3136/3304/10788/3683/3684/3687/3689/3903/10288/4057/4069/4318/4332/3071/150372/4973/11240/51316/5329/5788/5806/54509/6279/6402/5265/140885/10326/6556/6515/6518/7097/7305 | 7<br>0 |
| B<br>P | GO:00<br>02819 | regulation of<br>adaptive<br>immune<br>response                   | 36/92<br>6 | 150/1791<br>3 | 5.<br>26<br>E-<br>15 | 4.<br>59<br>E-<br>13 | 3.39E-13 | 100/113/301/695/718/6363/729230/29126/940/962/941/1378/2207/2208/2213/84868/3134/3594/3553/9173/90865/3569/3575/3718/10859/114548/5027/5588/5788/91543/64092/54440/6556/7128/10673/7454                                                                                                                                                                                   | 3<br>6 |
| B<br>P | GO:00<br>71621 | granulocyte<br>chemotaxis                                         | 27/92<br>6 | 84/17913      | 5.<br>64<br>E-<br>15 | 4.<br>85<br>E-<br>13 | 3.58E-13 | 30817/301/719/728/6357/6363/6366/6348/6352/1236/972/1441/1525/3576/1906/3680/3689/120425/4354/3071/5142/5293/5294/5880/9750/6279/7409                                                                                                                                                                                                                                     | 2<br>7 |
| B<br>P | GO:00<br>32609 | interferon-gamma<br>production                                    | 30/92<br>6 | 105/1791<br>3 | 6.<br>38<br>E-<br>15 | 5.<br>39<br>E-<br>13 | 3.98E-13 | 729230/1236/929/914/29126/916/10225/8320/84868/3113/3115/3594/3595/3553/9173/90865/3394/3702/10859/80380/5142/26191/10125/54440/140885/114836/6556/51284/51311/7294                                                                                                                                                                                                       | 3<br>0 |
| B<br>P | GO:00<br>30593 | neutrophil<br>chemotaxis                                          | 23/92<br>6 | 60/17913      | 7.<br>39<br>E-       | 6.<br>09<br>E-       | 4.49E-13 | 719/728/6363/6366/6348/1236/972/1441/1525/3576/1906/3680/3689/120425/4354/3071/5142/5293/5294/5880/9750/6279/7409                                                                                                                                                                                                                                                         | 2<br>3 |

|        |                |                                                               |            |               |                      |                      |          |                                                                                                                                                                                                                                                  |        |
|--------|----------------|---------------------------------------------------------------|------------|---------------|----------------------|----------------------|----------|--------------------------------------------------------------------------------------------------------------------------------------------------------------------------------------------------------------------------------------------------|--------|
|        |                |                                                               |            |               | 15                   | 13                   |          |                                                                                                                                                                                                                                                  |        |
| B<br>P | GO:00<br>50663 | cytokine<br>secretion                                         | 45/92<br>6 | 230/1791<br>3 | 7.<br>44<br>E-<br>15 | 6.<br>09<br>E-<br>13 | 4.49E-13 | 199/9447/301/384/55024/6363/6348/1236/929/914/29126/948/11116/1436/2213/2219/55612/2633/115362/84868/9734/3553/7850/3556/9173/90865/3937/353514/10859/4023/120892/4321/22861/114548/64127/5027/26191/10125/5552/7096/81793/7097/10333/51311/7128 | 4<br>5 |
| B<br>P | GO:00<br>50729 | positive<br>regulation of<br>inflammatory<br>response         | 36/92<br>6 | 153/1791<br>3 | 1.<br>02<br>E-<br>14 | 8.<br>20<br>E-<br>13 | 6.05E-13 | 695/712/718/6348/729230/1236/940/923/2207/115362/51704/3620/3553/9173/90865/3569/3684/3689/353514/4023/120892/64127/26471/9180/5294/7941/6279/6622/26228/7052/81793/7097/10333/51284/8600/54209                                                  | 3<br>6 |
| B<br>P | GO:00<br>32649 | regulation of<br>interferon-gamma<br>production               | 28/92<br>6 | 93/17913      | 1.<br>17<br>E-<br>14 | 9.<br>24<br>E-<br>13 | 6.82E-13 | 729230/1236/929/914/29126/916/10225/84868/3113/3115/3594/3595/3553/9173/90865/3394/10859/80380/5142/26191/10125/54440/140885/114836/6556/51284/51311/7294                                                                                        | 2<br>8 |
| B<br>P | GO:00<br>72676 | lymphocyte<br>migration                                       | 27/92<br>6 | 87/17913      | 1.<br>51<br>E-<br>14 | 1.<br>17<br>E-<br>12 | 8.67E-13 | 84830/199/6347/6364/6366/6348/6351/6352/729230/1236/9023/3627/6373/10563/2838/1880/3383/3676/4478/64005/11240/5293/5294/5979/9750/124976/7535                                                                                                    | 2<br>7 |
| B<br>P | GO:00<br>45619 | regulation of<br>lymphocyte<br>differentiation                | 37/92<br>6 | 164/1791<br>3 | 1.<br>80<br>E-<br>14 | 1.<br>38<br>E-<br>12 | 1.02E-12 | 100/301/695/6363/729230/914/939/940/972/941/942/1378/1493/56603/1960/115352/22806/3594/3559/3575/3662/3718/3902/10288/11006/3071/150372/114548/639/5788/10125/54440/56833/11005/9840/9760/7535                                                   | 3<br>7 |
| B<br>P | GO:00<br>06959 | humoral<br>immune<br>response                                 | 49/92<br>6 | 276/1791<br>3 | 2.<br>50<br>E-<br>14 | 1.<br>89<br>E-<br>12 | 1.40E-12 | 712/713/714/717/718/719/720/721/728/730/6357/6347/729230/1236/930/940/629/3426/1378/1380/10563/2208/2213/2219/10578/1880/3119/3553/3569/3512/5650/4057/4069/931/5079/5266/5450/5788/6279/710/4068/6556/11005/124976/6480/55061/54210/54209/11326 | 4<br>9 |
| B<br>P | GO:00<br>71219 | cellular<br>response to<br>molecule of<br>bacterial<br>origin | 39/92<br>6 | 183/1791<br>3 | 2.<br>59<br>E-<br>14 | 1.<br>93<br>E-<br>12 | 1.43E-12 | 27063/6347/6348/6352/929/4064/948/923/3627/3576/2213/84868/3055/3383/3553/11009/3569/3394/8564/10859/10288/4057/23643/4360/114548/64127/389643/5142/10891/26191/140885/26228/7035/7096/7097/10333/7128/54209/7538                                | 3<br>9 |
| B<br>P | GO:00<br>50707 | regulation of<br>cytokine<br>secretion                        | 41/92<br>6 | 201/1791<br>3 | 2.<br>72<br>E-<br>14 | 2.<br>00<br>E-<br>12 | 1.47E-12 | 199/9447/301/384/55024/6363/6348/1236/929/914/29126/1436/2213/2219/55612/2633/84868/9734/3553/7850/3556/9173/90865/353514/10859/4023/120892/4321/22861/114548/64127/5027/26191/10125/5552/7096/81793/7097/10333/51311                            | 4<br>1 |

|        |                |                                                                                                                                                                                     |            |               |                      |                      |          |                                                                                                                                                                                                                   |        |
|--------|----------------|-------------------------------------------------------------------------------------------------------------------------------------------------------------------------------------|------------|---------------|----------------------|----------------------|----------|-------------------------------------------------------------------------------------------------------------------------------------------------------------------------------------------------------------------|--------|
|        |                |                                                                                                                                                                                     |            |               |                      |                      |          | /7128                                                                                                                                                                                                             |        |
| B<br>P | GO:00<br>42116 | macrophage<br>activation                                                                                                                                                            | 28/92<br>6 | 96/17913      | 2.<br>87<br>E-<br>14 | 2.<br>08<br>E-<br>12 | 1.53E-12 | 199/712/728/6348/972/2213/2358/84868/9173/133396/9086<br>5/3569/3684/3689/3725/120892/5788/6556/6622/26228/709<br>6/7097/10333/51284/51311/54209/7305/11326                                                       | 2<br>8 |
| B<br>P | GO:00<br>70665 | positive<br>regulation of<br>leukocyte<br>proliferation                                                                                                                             | 33/92<br>6 | 134/1791<br>3 | 3.<br>25<br>E-<br>14 | 2.<br>32<br>E-<br>12 | 1.71E-12 | 100/199/301/6363/6352/729230/30835/29126/940/952/916/9<br>23/972/11151/115352/1880/84868/3109/3113/3115/3481/35<br>94/3553/3559/3569/10288/3071/5588/5788/54440/10673/74<br>12/7535                               | 3<br>3 |
| B<br>P | GO:00<br>02822 | regulation of<br>adaptive<br>immune<br>response<br>based on<br>somatic<br>recombinati<br>on of<br>immune<br>receptors<br>built from<br>immunoglob<br>ulin<br>superfamily<br>domains | 33/92<br>6 | 135/1791<br>3 | 4.<br>10<br>E-<br>14 | 2.<br>88<br>E-<br>12 | 2.13E-12 | 100/301/695/718/6363/729230/29126/940/941/1378/2207/22<br>08/2213/84868/3134/3594/3553/9173/90865/3569/3575/371<br>8/10859/114548/5027/5588/5788/91543/54440/6556/7128/1<br>0673/7454                             | 3<br>3 |
| B<br>P | GO:00<br>02685 | regulation of<br>leukocyte<br>migration                                                                                                                                             | 39/92<br>6 | 186/1791<br>3 | 4.<br>54<br>E-<br>14 | 3.<br>15<br>E-<br>12 | 2.33E-12 | 100/84830/199/301/719/728/6363/6347/6364/6366/6348/635<br>1/6352/729230/1236/972/3627/10563/3576/1843/1906/2358/<br>3162/3383/90865/3569/3676/4354/4478/3071/11240/7941/5<br>880/9750/6403/56833/26228/54209/7422 | 3<br>9 |
| B<br>P | GO:00<br>50853 | B cell<br>receptor<br>signaling<br>pathway                                                                                                                                          | 21/92<br>6 | 53/17913      | 5.<br>05<br>E-<br>14 | 3.<br>46<br>E-<br>12 | 2.55E-12 | 640/695/930/933/952/973/1493/2213/115352/89857/4332/93<br>1/3071/150372/5079/5293/23228/5579/26191/5788/26228                                                                                                     | 2<br>1 |
| B<br>P | GO:19<br>90266 | neutrophil<br>migration                                                                                                                                                             | 24/92<br>6 | 72/17913      | 7.<br>34<br>E-<br>14 | 4.<br>96<br>E-<br>12 | 3.66E-12 | 719/728/6363/6366/6348/1236/972/1441/1525/3576/1906/36<br>80/3689/120425/4354/3071/5142/5293/5294/5880/9750/627<br>9/56833/7409                                                                                   | 2<br>4 |

|        |                |                                                                                       |            |               |                      |                      |          |                                                                                                                                                                                                                                                                                                                                                                                             |        |
|--------|----------------|---------------------------------------------------------------------------------------|------------|---------------|----------------------|----------------------|----------|---------------------------------------------------------------------------------------------------------------------------------------------------------------------------------------------------------------------------------------------------------------------------------------------------------------------------------------------------------------------------------------------|--------|
| B<br>P | GO:00<br>97530 | granulocyte<br>migration                                                              | 28/92<br>6 | 100/1791<br>3 | 8.<br>96<br>E-<br>14 | 5.<br>91<br>E-<br>12 | 4.36E-12 | 30817/301/719/728/6357/6363/6366/6348/6352/1236/972/14<br>41/1525/3576/1906/3680/3689/120425/4354/3071/5142/529<br>3/5294/5880/9750/6279/56833/7409                                                                                                                                                                                                                                         | 2<br>8 |
| B<br>P | GO:19<br>03555 | regulation of<br>tumor<br>necrosis<br>factor<br>superfamily<br>cytokine<br>production | 35/92<br>6 | 155/1791<br>3 | 8.<br>97<br>E-<br>14 | 5.<br>91<br>E-<br>12 | 4.36E-12 | 54/384/6363/6348/729230/929/914/29126/948/942/1536/220<br>7/10457/84868/11213/353514/10859/4023/120892/4057/236<br>43/197358/64127/26191/5788/10125/54440/140885/6504/70<br>96/7097/7128/54209/7305/7538                                                                                                                                                                                    | 3<br>5 |
| B<br>P | GO:00<br>98542 | defense<br>response to<br>other<br>organism                                           | 67/92<br>6 | 481/1791<br>3 | 1.<br>06<br>E-<br>13 | 6.<br>88<br>E-<br>12 | 5.08E-12 | 54/575/9447/306/384/330/728/6364/948/64581/3627/10563/<br>4283/55601/10875/2358/2633/10578/84868/51191/3428/342<br>9/10964/2537/3434/10410/3594/3553/3559/90865/3569/366<br>2/3394/3512/5650/10859/4057/4069/4321/219972/4599/841<br>66/22861/114548/64127/4939/8638/5027/51316/5551/5788/<br>91543/6279/6403/56833/6556/91607/11005/23166/55576/70<br>97/10333/51284/51311/7128/10346/7728 | 6<br>7 |
| B<br>P | GO:00<br>45089 | positive<br>regulation of<br>innate<br>immune<br>response                             | 57/92<br>6 | 373/1791<br>3 | 1.<br>57<br>E-<br>13 | 1.<br>00<br>E-<br>11 | 7.41E-12 | 9447/330/695/6352/929/30835/948/10462/64581/1514/5560<br>1/2069/2099/2207/2219/115352/2358/115362/84868/3055/3<br>134/3304/3428/11213/3662/3684/3689/3902/4057/23643/86<br>85/4321/4332/94025/4583/84166/64127/5063/118788/5696/<br>5698/26191/149628/10125/91543/6279/4068/114836/7096/8<br>1793/7097/10333/51284/51311/7128/7294/7409                                                     | 5<br>7 |
| B<br>P | GO:00<br>01774 | microglial<br>cell<br>activation                                                      | 20/92<br>6 | 50/17913      | 1.<br>64<br>E-<br>13 | 1.<br>02<br>E-<br>11 | 7.55E-12 | 199/712/728/6348/2358/90865/3569/3684/3689/3725/12089<br>2/5788/6622/26228/7097/10333/51284/51311/54209/7305                                                                                                                                                                                                                                                                                | 2<br>0 |
| B<br>P | GO:00<br>02269 | leukocyte<br>activation<br>involved in<br>inflammator<br>y response                   | 20/92<br>6 | 50/17913      | 1.<br>64<br>E-<br>13 | 1.<br>02<br>E-<br>11 | 7.55E-12 | 199/712/728/6348/2358/90865/3569/3684/3689/3725/12089<br>2/5788/6622/26228/7097/10333/51284/51311/54209/7305                                                                                                                                                                                                                                                                                | 2<br>0 |
| B<br>P | GO:00<br>32623 | interleukin-2<br>production                                                           | 22/92<br>6 | 62/17913      | 1.<br>85<br>E-<br>13 | 1.<br>15<br>E-<br>11 | 8.45E-12 | 301/729230/919/940/916/941/942/2207/2633/84868/3553/35<br>56/3662/3902/5142/5588/5788/54440/6556/7128/11326/753<br>8                                                                                                                                                                                                                                                                        | 2<br>2 |

|        |                |                                                                      |            |               |                      |                      |          |                                                                                                                                                                                                                                                                                                                                                |        |
|--------|----------------|----------------------------------------------------------------------|------------|---------------|----------------------|----------------------|----------|------------------------------------------------------------------------------------------------------------------------------------------------------------------------------------------------------------------------------------------------------------------------------------------------------------------------------------------------|--------|
| B<br>P | GO:00<br>02703 | regulation of<br>leukocyte<br>mediated<br>immunity                   | 38/92<br>6 | 185/1791<br>3 | 1.<br>91<br>E-<br>13 | 1.<br>17<br>E-<br>11 | 8.62E-12 | 30817/695/718/729230/940/8832/10225/1378/1776/2207/2208/2213/84868/3134/3162/3594/3553/3569/3575/3684/3689/3718/3902/10859/114548/64127/5027/5788/5880/10125/91543/54440/5272/4068/114836/6812/7409/7454                                                                                                                                       | 3<br>8 |
| B<br>P | GO:00<br>50920 | regulation of<br>chemotaxis                                          | 38/92<br>6 | 186/1791<br>3 | 2.<br>29<br>E-<br>13 | 1.<br>38<br>E-<br>11 | 1.02E-11 | 199/719/728/6363/6347/6366/6348/6351/6352/729230/1233/1236/972/3627/10563/3576/7852/1843/1906/2152/2358/1880/3603/3569/4354/3071/11240/7941/5800/5880/9750/6091/10371/56833/26228/54209/347733/7422                                                                                                                                            | 3<br>8 |
| B<br>P | GO:01<br>50076 | neuroinflam<br>matory<br>response                                    | 24/92<br>6 | 76/17913      | 2.<br>85<br>E-<br>13 | 1.<br>69<br>E-<br>11 | 1.25E-11 | 107/199/712/728/6348/2358/3553/90865/3569/3684/3689/3725/120892/4318/26471/5788/6622/26228/7097/10333/51284/51311/54209/7305                                                                                                                                                                                                                   | 2<br>4 |
| B<br>P | GO:19<br>03706 | regulation of<br>hemopoiesi<br>s                                     | 65/92<br>6 | 468/1791<br>3 | 2.<br>87<br>E-<br>13 | 1.<br>69<br>E-<br>11 | 1.25E-11 | 100/301/695/714/6363/6348/729230/914/939/940/972/941/942/1021/1378/1441/1493/56603/1960/2124/2213/115352/2811/29909/3059/8356/8361/3218/3304/22806/3594/3559/3575/3662/3718/3725/3902/10859/10288/11006/4057/3071/150372/114548/8013/639/5579/5588/5696/5698/5788/10125/54440/56833/6688/11005/9840/55365/28959/8600/9760/54209/7305/7535/7538 | 6<br>5 |
| B<br>P | GO:00<br>71706 | tumor<br>necrosis<br>factor<br>superfamily<br>cytokine<br>production | 35/92<br>6 | 161/1791<br>3 | 2.<br>98<br>E-<br>13 | 1.<br>73<br>E-<br>11 | 1.28E-11 | 54/384/6363/6348/729230/929/914/29126/948/942/1536/2207/10457/84868/11213/353514/10859/4023/120892/4057/23643/197358/64127/26191/5788/10125/54440/140885/6504/7096/7097/7128/54209/7305/7538                                                                                                                                                   | 3<br>5 |
| B<br>P | GO:00<br>71216 | cellular<br>response to<br>biotic<br>stimulus                        | 40/92<br>6 | 206/1791<br>3 | 3.<br>08<br>E-<br>13 | 1.<br>77<br>E-<br>11 | 1.31E-11 | 27063/695/6347/6348/6352/929/4064/948/923/3627/3576/2213/84868/3055/3383/3553/11009/3569/3394/8564/10859/10288/4057/23643/4360/114548/64127/389643/5142/10891/26191/140885/26228/7035/7096/7097/10333/7128/54209/7538                                                                                                                          | 4<br>0 |
| B<br>P | GO:00<br>61900 | glial cell<br>activation                                             | 21/92<br>6 | 59/17913      | 6.<br>13<br>E-<br>13 | 3.<br>49<br>E-<br>11 | 2.58E-11 | 199/712/728/6348/2358/3553/90865/3569/3684/3689/3725/120892/5788/6622/26228/7097/10333/51284/51311/54209/7305                                                                                                                                                                                                                                  | 2<br>1 |
| B<br>P | GO:00<br>02285 | lymphocyte<br>activation<br>involved in                              | 34/92<br>6 | 158/1791<br>3 | 8.<br>86<br>E-       | 4.<br>99<br>E-       | 3.68E-11 | 100/301/54518/6363/930/911/940/941/942/11151/55619/139818/8320/2213/10875/1880/84868/3109/3134/3383/3594/3569/3662/3683/9452/3718/3936/10859/4063/114548/23228/5                                                                                                                                                                               | 3<br>4 |

|        |                |                                                |            |               |                      |                      |          |                                                                                                                                                                                                                                                              |        |
|--------|----------------|------------------------------------------------|------------|---------------|----------------------|----------------------|----------|--------------------------------------------------------------------------------------------------------------------------------------------------------------------------------------------------------------------------------------------------------------|--------|
|        |                | immune response                                |            |               | 13                   | 11                   |          | 788/114836/6556                                                                                                                                                                                                                                              |        |
| B<br>P | GO:00<br>32680 | regulation of tumor necrosis factor production | 33/92<br>6 | 151/1791<br>3 | 1.<br>22<br>E-<br>12 | 6.<br>78<br>E-<br>11 | 5.00E-11 | 54/384/6363/6348/729230/929/914/948/1536/2207/10457/84868/11213/353514/10859/4023/120892/4057/23643/197358/64127/26191/5788/10125/54440/140885/6504/7096/7097/7128/54209/7305/7538                                                                           | 3<br>3 |
| B<br>P | GO:00<br>02688 | regulation of leukocyte chemotaxis             | 27/92<br>6 | 105/1791<br>3 | 2.<br>33<br>E-<br>12 | 1.<br>28<br>E-<br>10 | 9.45E-11 | 199/719/728/6363/6347/6366/6348/6351/6352/729230/1236/972/3627/10563/3576/1843/1906/2358/3569/4354/3071/11240/7941/5880/9750/56833/26228                                                                                                                     | 2<br>7 |
| B<br>P | GO:00<br>32640 | tumor necrosis factor production               | 33/92<br>6 | 155/1791<br>3 | 2.<br>63<br>E-<br>12 | 1.<br>42<br>E-<br>10 | 1.05E-10 | 54/384/6363/6348/729230/929/914/948/1536/2207/10457/84868/11213/353514/10859/4023/120892/4057/23643/197358/64127/26191/5788/10125/54440/140885/6504/7096/7097/7128/54209/7305/7538                                                                           | 3<br>3 |
| B<br>P | GO:00<br>01818 | negative regulation of cytokine production     | 47/92<br>6 | 290/1791<br>3 | 2.<br>63<br>E-<br>12 | 1.<br>42<br>E-<br>10 | 1.05E-10 | 54/113/301/384/55024/695/29126/8832/10225/2213/2633/10457/84868/9734/51191/3134/3162/3620/7850/9173/90865/3569/11213/3718/3902/353514/10859/4057/4210/3071/197358/84166/114548/80380/26191/5788/140885/6504/6556/5552/10333/51311/7128/54209/7305/11326/7538 | 4<br>7 |
| B<br>P | GO:00<br>60337 | type I interferon signaling pathway            | 25/92<br>6 | 91/17913      | 3.<br>05<br>E-<br>12 | 1.<br>61<br>E-<br>10 | 1.19E-10 | 1958/3105/3106/3107/3134/3136/3429/2537/3434/3433/3437/8519/10581/10410/3662/3664/3394/4321/4599/84166/4939/8638/5696/91543/54739                                                                                                                            | 2<br>5 |
| B<br>P | GO:00<br>71357 | cellular response to type I interferon         | 25/92<br>6 | 91/17913      | 3.<br>05<br>E-<br>12 | 1.<br>61<br>E-<br>10 | 1.19E-10 | 1958/3105/3106/3107/3134/3136/3429/2537/3434/3433/3437/8519/10581/10410/3662/3664/3394/4321/4599/84166/4939/8638/5696/91543/54739                                                                                                                            | 2<br>5 |
| B<br>P | GO:00<br>45580 | regulation of T cell differentiation           | 31/92<br>6 | 139/1791<br>3 | 3.<br>33<br>E-<br>12 | 1.<br>74<br>E-<br>10 | 1.28E-10 | 100/301/6363/729230/914/939/940/972/941/942/1378/1493/56603/1960/3594/3559/3575/3662/3718/3902/10288/11006/3071/114548/639/5788/10125/54440/11005/9840/7535                                                                                                  | 3<br>1 |
| B<br>P | GO:00<br>42100 | B cell proliferation                           | 22/92<br>6 | 71/17913      | 4.<br>31<br>E-<br>12 | 2.<br>23<br>E-<br>10 | 1.64E-10 | 100/695/930/933/952/972/973/1380/1493/2213/115352/1880/22806/3575/4332/931/51237/3071/23228/5788/10673/7305                                                                                                                                                  | 2<br>2 |

|        |                |                                                                       |            |               |                      |                      |          |                                                                                                                                                                                                         |        |
|--------|----------------|-----------------------------------------------------------------------|------------|---------------|----------------------|----------------------|----------|---------------------------------------------------------------------------------------------------------------------------------------------------------------------------------------------------------|--------|
| B<br>P | GO:00<br>71222 | cellular<br>response to<br>lipopolysacc<br>haride                     | 35/92<br>6 | 176/1791<br>3 | 4.<br>60<br>E-<br>12 | 2.<br>36<br>E-<br>10 | 1.74E-10 | 27063/6347/6348/6352/929/4064/948/923/3627/3576/84868/<br>3055/3383/3553/11009/3569/3394/8564/10859/10288/4057/<br>23643/4360/114548/64127/389643/5142/10891/26191/1408<br>85/26228/7035/7097/7128/7538 | 3<br>5 |
| B<br>P | GO:00<br>32612 | interleukin-1<br>production                                           | 27/92<br>6 | 108/1791<br>3 | 4.<br>79<br>E-<br>12 | 2.<br>43<br>E-<br>10 | 1.79E-10 | 54/9447/301/384/6363/6348/1236/948/1958/115362/84868/3<br>428/3553/7850/353514/4023/4210/22861/114548/64127/502<br>7/140885/10333/51311/7128/54209/7305                                                 | 2<br>7 |
| B<br>P | GO:00<br>72678 | T cell<br>migration                                                   | 20/92<br>6 | 59/17913      | 6.<br>22<br>E-<br>12 | 3.<br>12<br>E-<br>10 | 2.31E-10 | 199/6347/6364/6366/6348/6352/729230/3627/6373/10563/2<br>838/1880/3383/3676/4478/64005/5293/5294/9750/7535                                                                                              | 2<br>0 |
| B<br>P | GO:00<br>48002 | antigen<br>processing<br>and<br>presentation<br>of peptide<br>antigen | 36/92<br>6 | 188/1791<br>3 | 7.<br>27<br>E-<br>12 | 3.<br>61<br>E-<br>10 | 2.67E-10 | 30835/948/972/10332/1514/1536/64167/2209/2213/3105/31<br>06/3107/3108/3109/3112/3113/3115/3118/3119/3120/3122/3<br>123/3125/3134/3136/10437/3902/653361/4688/4689/5696/5<br>698/6556/6890/6891/54209    | 3<br>6 |
| B<br>P | GO:00<br>50777 | negative<br>regulation of<br>immune<br>response                       | 31/92<br>6 | 143/1791<br>3 | 7.<br>34<br>E-<br>12 | 3.<br>61<br>E-<br>10 | 2.67E-10 | 301/384/729230/8832/10225/1378/1493/2213/127943/84868<br>/3134/3162/3428/9173/3559/90865/3575/11213/3718/10859/<br>4321/197358/84166/5788/64092/5272/710/56833/11005/712<br>8/11326                     | 3<br>1 |
| B<br>P | GO:00<br>34340 | response to<br>type I<br>interferon                                   | 25/92<br>6 | 95/17913      | 8.<br>68<br>E-<br>12 | 4.<br>23<br>E-<br>10 | 3.12E-10 | 1958/3105/3106/3107/3134/3136/3429/2537/3434/3433/343<br>7/8519/10581/10410/3662/3664/3394/4321/4599/84166/493<br>9/8638/5696/91543/54739                                                               | 2<br>5 |
| B<br>P | GO:00<br>50852 | T cell<br>receptor<br>signaling<br>pathway                            | 35/92<br>6 | 180/1791<br>3 | 9.<br>03<br>E-<br>12 | 4.<br>36<br>E-<br>10 | 3.22E-10 | 100/1236/919/915/916/917/2533/2633/3113/3115/3118/3119<br>/3120/3122/3123/3125/3702/3932/3937/11006/5063/5142/52<br>93/5588/5696/5698/26191/5788/9840/387357/9473/50852/7<br>294/7454/7535              | 3<br>5 |
| B<br>P | GO:00<br>71887 | leukocyte<br>apoptotic<br>process                                     | 26/92<br>6 | 103/1791<br>3 | 9.<br>38<br>E-<br>12 | 4.<br>49<br>E-<br>10 | 3.31E-10 | 100/384/695/6363/6366/6352/1236/939/29126/917/972/1514<br>/2207/3059/3620/3559/3569/3575/3718/10859/64127/8013/5<br>027/5293/5588/1831                                                                  | 2<br>6 |
| B<br>P | GO:00<br>02286 | T cell<br>activation                                                  | 24/92<br>6 | 88/17913      | 9.<br>85             | 4.<br>67             | 3.44E-10 | 301/54518/6363/911/941/942/8320/2213/10875/1880/84868/<br>3109/3383/3594/3569/3662/3683/3718/3936/10859/4063/11                                                                                         | 2<br>4 |



|        |             |                                                          |        |           |          |          |          |                                                                                                                                                                                                                                                                                                                                        |    |
|--------|-------------|----------------------------------------------------------|--------|-----------|----------|----------|----------|----------------------------------------------------------------------------------------------------------------------------------------------------------------------------------------------------------------------------------------------------------------------------------------------------------------------------------------|----|
|        |             | involved in immune response                              |        |           | E-12     | E-10     |          | 4548/114836/6556                                                                                                                                                                                                                                                                                                                       |    |
| B<br>P | GO:0009615  | response to virus                                        | 49/926 | 323/17913 | 1.08E-11 | 5.07E-10 | 3.74E-10 | 9447/330/6363/6351/6352/1021/3627/4283/7852/9201/55601/10875/2633/51191/8091/3428/3429/10561/10964/2537/3434/3433/3437/8519/10581/10410/3594/3553/3559/90865/3569/11213/10859/4321/4599/84166/114548/4939/8638/11040/5551/5788/91543/91607/51284/51311/7128/10346/7728                                                                 | 49 |
| B<br>P | GO:0002791  | regulation of peptide secretion                          | 63/926 | 483/17913 | 1.10E-11 | 5.11E-10 | 3.77E-10 | 150/84830/199/9447/27063/301/8862/348/384/8938/55024/640/777/6363/6348/6352/1236/929/914/933/29126/952/972/1436/1803/2213/2219/55612/2633/84868/9734/3553/7850/3556/9173/90865/3569/353514/10859/4023/120892/4321/22861/114548/64127/5027/26191/10125/91543/6279/6513/80725/5552/7096/81793/7097/10333/51311/7128/8600/54209/7273/7447 | 63 |
| B<br>P | GO:0002440  | production of molecular mediator of immune response      | 36/926 | 191/17913 | 1.18E-11 | 5.42E-10 | 4.00E-10 | 695/729230/933/940/948/972/10225/2207/2213/115352/10875/51704/3119/3134/3162/3553/90865/3569/3575/11213/9452/3718/5650/54900/10859/51237/114548/64127/8013/5788/91543/54440/6556/11005/7097/10673                                                                                                                                      | 36 |
| B<br>P | GO:0002577  | regulation of antigen processing and presentation        | 12/926 | 19/17913  | 1.22E-11 | 5.59E-10 | 4.12E-10 | 6363/6366/1236/972/2213/10875/3112/10288/64127/6556/54209/7454                                                                                                                                                                                                                                                                         | 12 |
| B<br>P | GO:2000106  | regulation of leukocyte apoptotic process                | 23/926 | 82/17913  | 1.41E-11 | 6.38E-10 | 4.71E-10 | 100/384/695/6363/6366/6352/1236/939/29126/917/972/2207/3059/3620/3575/3718/10859/64127/8013/5027/5293/5588/1831                                                                                                                                                                                                                        | 23 |
| B<br>P | GO:00050731 | positive regulation of peptidyl-tyrosine phosphorylation | 35/926 | 184/17913 | 1.73E-11 | 7.78E-10 | 5.74E-10 | 150/389658/374/55024/6352/948/916/960/972/941/1436/5168/2069/2209/2261/2322/51704/1839/3059/3383/3481/11009/133396/3569/353514/4038/653361/3084/5788/5649/9021/80725/26228/54209/7422                                                                                                                                                  | 35 |
| B      | GO:00       | positive                                                 | 20/92  | 62/17913  | 1.       | 7.       | 5.80E-10 | 729230/929/914/916/84868/3113/3115/3594/3595/3553/339                                                                                                                                                                                                                                                                                  | 20 |

|        |                |                                                      |            |           |                      |                      |          |                                                                                                                                                                                                                                                                                                                                                 |        |
|--------|----------------|------------------------------------------------------|------------|-----------|----------------------|----------------------|----------|-------------------------------------------------------------------------------------------------------------------------------------------------------------------------------------------------------------------------------------------------------------------------------------------------------------------------------------------------|--------|
| P      | 32729          | regulation of interferon-gamma production            | 6          |           | 77<br>E-<br>11       | 86<br>E-<br>10       |          | 4/5142/26191/10125/54440/114836/6556/51284/51311/7294                                                                                                                                                                                                                                                                                           | 0      |
| B<br>P | GO:00<br>42108 | positive regulation of cytokine biosynthetic process | 20/92<br>6 | 63/17913  | 2.<br>47<br>E-<br>11 | 1.<br>09<br>E-<br>09 | 8.02E-10 | 729230/940/916/941/942/1536/1958/2069/3162/3553/3569/3662/4050/5588/5788/7096/10333/51284/51311/7305                                                                                                                                                                                                                                            | 2<br>0 |
| B<br>P | GO:00<br>46631 | alpha-beta T cell activation                         | 29/92<br>6 | 133/17913 | 3.<br>00<br>E-<br>11 | 1.<br>31<br>E-<br>09 | 9.67E-10 | 100/301/384/6363/729230/29126/940/916/941/942/1794/8320/1880/3594/3569/3662/3718/10859/4063/3071/114548/26279/639/5588/5788/91543/54440/114836/7535                                                                                                                                                                                             | 2<br>9 |
| B<br>P | GO:00<br>32611 | interleukin-1 beta production                        | 24/92<br>6 | 93/17913  | 3.<br>56<br>E-<br>11 | 1.<br>54<br>E-<br>09 | 1.14E-09 | 54/9447/384/6363/6348/1236/948/1958/115362/3428/3553/353514/4023/4210/22861/114548/64127/5027/140885/10333/51311/7128/54209/7305                                                                                                                                                                                                                | 2<br>4 |
| B<br>P | GO:00<br>43410 | positive regulation of MAPK cascade                  | 63/92<br>6 | 499/17913 | 4.<br>47<br>E-<br>11 | 1.<br>92<br>E-<br>09 | 1.42E-09 | 150/389658/348/55024/728/6363/6366/6348/1236/939/948/960/972/50937/1116/1436/7852/1906/10595/2213/115352/2261/2322/2357/2358/64762/2651/10457/1880/84868/3383/3481/3553/3569/3725/353514/23566/120892/11184/8685/653361/64127/3084/5027/5031/5063/5294/23533/26191/5788/10125/5979/6091/388325/10371/6504/6899/10333/8600/23043/54209/7422/9839 | 6<br>3 |
| B<br>P | GO:00<br>50864 | regulation of B cell activation                      | 26/92<br>6 | 110/17913 | 4.<br>66<br>E-<br>11 | 1.<br>99<br>E-<br>09 | 1.47E-09 | 100/55024/695/930/933/939/940/952/972/1493/2213/115352/1880/22806/3569/4332/51237/3071/150372/64127/5788/64092/56833/7128/10673/7305                                                                                                                                                                                                            | 2<br>6 |
| B<br>P | GO:00<br>02526 | acute inflammatory response                          | 38/92<br>6 | 220/17913 | 4.<br>85<br>E-<br>11 | 2.<br>05<br>E-<br>09 | 1.51E-09 | 695/712/713/714/717/718/719/720/721/728/730/1236/9332/930/923/629/3426/1378/1380/1776/2152/2207/2213/3383/3553/3569/114548/26471/9180/5294/6279/5265/710/55061/8600/54210/7412/11326                                                                                                                                                            | 3<br>8 |
| B<br>P | GO:20<br>00107 | negative regulation of leukocyte apoptotic           | 17/92<br>6 | 46/17913  | 4.<br>93<br>E-<br>11 | 2.<br>06<br>E-<br>09 | 1.52E-09 | 100/384/6363/6366/6352/1236/939/972/2207/3059/3620/3575/3718/10859/64127/5588/1831                                                                                                                                                                                                                                                              | 1<br>7 |

|        |                | process                                                                                                                                                                                         |            |               |                      |                      |          |                                                                                                                                                                                                                                                                                                                                         |        |
|--------|----------------|-------------------------------------------------------------------------------------------------------------------------------------------------------------------------------------------------|------------|---------------|----------------------|----------------------|----------|-----------------------------------------------------------------------------------------------------------------------------------------------------------------------------------------------------------------------------------------------------------------------------------------------------------------------------------------|--------|
| B<br>P | GO:00<br>45123 | cellular<br>extravasatio<br>n                                                                                                                                                                   | 19/92<br>6 | 59/17913      | 5.<br>86<br>E-<br>11 | 2.<br>44<br>E-<br>09 | 1.80E-09 | 119/6347/6366/729230/2650/3383/3676/3689/120425/5293/<br>5294/50512/9750/6401/6402/6403/6404/140885/7412                                                                                                                                                                                                                                | 1<br>9 |
| B<br>P | GO:00<br>06911 | phagocytosi<br>s,<br>engulfment                                                                                                                                                                 | 16/92<br>6 | 41/17913      | 6.<br>97<br>E-<br>11 | 2.<br>87<br>E-<br>09 | 2.12E-09 | 575/199/51411/718/948/9844/2207/2209/2213/3684/3689/86<br>85/4481/3071/26228/54209                                                                                                                                                                                                                                                      | 1<br>6 |
| B<br>P | GO:00<br>50708 | regulation of<br>protein<br>secretion                                                                                                                                                           | 59/92<br>6 | 456/1791<br>3 | 7.<br>04<br>E-<br>11 | 2.<br>88<br>E-<br>09 | 2.12E-09 | 150/84830/199/9447/27063/301/348/384/8938/55024/640/77<br>7/6363/6348/6352/1236/929/914/933/29126/952/1436/1803/<br>2213/2219/55612/2633/84868/9734/3553/7850/3556/9173/9<br>0865/3569/353514/10859/4023/120892/4321/22861/114548/<br>64127/5027/26191/10125/91543/6513/80725/5552/7096/817<br>93/7097/10333/51311/7128/54209/7273/7447 | 5<br>9 |
| B<br>P | GO:00<br>02687 | positive<br>regulation of<br>leukocyte<br>migration                                                                                                                                             | 27/92<br>6 | 121/1791<br>3 | 8.<br>20<br>E-<br>11 | 3.<br>32<br>E-<br>09 | 2.45E-09 | 199/719/728/6363/6364/6366/6348/6351/6352/729230/1236/<br>972/3627/10563/3576/1906/2358/3383/3569/3676/3071/794<br>1/5880/9750/6403/54209/7422                                                                                                                                                                                          | 2<br>7 |
| B<br>P | GO:00<br>02824 | positive<br>regulation of<br>adaptive<br>immune<br>response<br>based on<br>somatic<br>recombinati<br>on of<br>immune<br>receptors<br>built from<br>immunoglob<br>ulin<br>superfamily<br>domains | 23/92<br>6 | 89/17913      | 8.<br>83<br>E-<br>11 | 3.<br>55<br>E-<br>09 | 2.62E-09 | 100/301/695/718/6363/729230/29126/940/941/2207/2208/31<br>34/3594/3553/3569/114548/5027/5588/5788/91543/54440/6<br>556/10673                                                                                                                                                                                                            | 2<br>3 |
| B<br>P | GO:00<br>50921 | positive<br>regulation of                                                                                                                                                                       | 28/92<br>6 | 130/1791<br>3 | 8.<br>92             | 3.<br>56             | 2.63E-09 | 199/719/728/6363/6366/6348/6351/6352/729230/1233/1236/<br>972/3627/10563/3576/7852/1906/2152/2358/3603/3569/307                                                                                                                                                                                                                         | 2<br>8 |

|        |                |                                                           |            |           |          |          |          |                                                                                                                                                                                                                                                                         |        |
|--------|----------------|-----------------------------------------------------------|------------|-----------|----------|----------|----------|-------------------------------------------------------------------------------------------------------------------------------------------------------------------------------------------------------------------------------------------------------------------------|--------|
|        |                | chemotaxis                                                |            |           | E-11     | E-09     |          | 1/7941/5880/9750/54209/347733/7422                                                                                                                                                                                                                                      |        |
| B<br>P | GO:00<br>32663 | regulation of interleukin-2 production                    | 18/92<br>6 | 54/17913  | 9.<br>80 | 3.<br>88 | 2.86E-09 | 301/729230/940/916/941/942/2633/84868/3553/3662/3902/5142/5588/5788/54440/7128/11326/7538                                                                                                                                                                               | 1<br>8 |
| B<br>P | GO:00<br>50715 | positive regulation of cytokine secretion                 | 28/92<br>6 | 132/17913 | 1.<br>30 | 5.<br>13 | 3.78E-09 | 199/9447/6363/6348/929/914/29126/1436/2219/55612/84868/3553/3556/9173/90865/353514/4023/120892/4321/22861/114548/64127/5027/26191/10125/7096/7097/51311                                                                                                                 | 2<br>8 |
| B<br>P | GO:00<br>01776 | leukocyte homeostasis                                     | 22/92<br>6 | 84/17913  | 1.<br>71 | 6.<br>65 | 4.91E-09 | 100/301/729230/972/11151/55619/139818/2207/2322/84636/1880/3559/3569/3718/3071/5027/5142/5293/124976/7128/10673/1831                                                                                                                                                    | 2<br>2 |
| B<br>P | GO:00<br>50854 | regulation of antigen receptor-mediated signaling pathway | 19/92<br>6 | 63/17913  | 2.<br>11 | 8.<br>18 | 6.04E-09 | 100/640/1236/930/933/2213/115352/2633/3932/11006/150372/5079/23228/5579/26191/5788/26228/9840/50852                                                                                                                                                                     | 1<br>9 |
| B<br>P | GO:00<br>43062 | extracellular structure organization                      | 52/92<br>6 | 387/17913 | 2.<br>49 | 9.<br>52 | 7.02E-09 | 8728/56999/54507/84830/341/348/655/146206/948/960/999/1071/1310/1285/1286/1297/55790/1514/1803/2201/55612/3383/3569/3675/3676/3680/3683/3684/3687/3689/3691/3696/5650/284217/3909/3914/3936/4018/4023/4321/4316/4318/4868/7941/5806/5268/6662/11005/9806/6696/4982/7412 | 5<br>2 |
| B<br>P | GO:00<br>02695 | negative regulation of leukocyte activation               | 31/92<br>6 | 163/17913 | 2.<br>50 | 9.<br>52 | 7.02E-09 | 301/384/55024/695/729230/29126/972/8832/1493/2213/10457/84868/3134/3162/3620/3559/133396/3718/3902/54900/10859/10288/4332/80380/26191/5788/9750/64092/7128/7305/11326                                                                                                   | 3<br>1 |
| B<br>P | GO:00<br>02706 | regulation of lymphocyte mediated immunity                | 28/92<br>6 | 136/17913 | 2.<br>72 | 1.<br>03 | 7.60E-09 | 695/718/729230/940/10225/1378/2207/2208/2213/84868/3134/3594/3553/3569/3575/3902/10859/114548/5027/5788/10125/91543/54440/5272/4068/114836/7409/7454                                                                                                                    | 2<br>8 |
| B<br>P | GO:00<br>01910 | regulation of leukocyte mediated                          | 19/92<br>6 | 64/17913  | 2.<br>86 | 1.<br>07 | 7.93E-09 | 1776/2213/84868/3134/3383/3594/3575/3684/3902/10859/5027/5788/10125/5272/4068/114836/26228/7305/7409                                                                                                                                                                    | 1<br>9 |

|        |                |                                                                                  |            |               |                      |                      |          |                                                                                                                                                                                                                                                       |        |
|--------|----------------|----------------------------------------------------------------------------------|------------|---------------|----------------------|----------------------|----------|-------------------------------------------------------------------------------------------------------------------------------------------------------------------------------------------------------------------------------------------------------|--------|
|        |                | cytotoxicity                                                                     |            |               | 10                   | 08                   |          |                                                                                                                                                                                                                                                       |        |
| B<br>P | GO:00<br>02821 | positive<br>regulation of<br>adaptive<br>immune<br>response                      | 23/92<br>6 | 94/17913      | 2.<br>91<br>E-<br>10 | 1.<br>08<br>E-<br>08 | 8.00E-09 | 100/301/695/718/6363/729230/29126/940/941/2207/2208/3134/3594/3553/3569/114548/5027/5588/5788/91543/54440/6556/10673                                                                                                                                  | 2<br>3 |
| B<br>P | GO:00<br>02700 | regulation of<br>production<br>of molecular<br>mediator of<br>immune<br>response | 28/92<br>6 | 138/1791<br>3 | 3.<br>89<br>E-<br>10 | 1.<br>44<br>E-<br>08 | 1.06E-08 | 695/729230/933/940/948/972/10225/2207/2213/115352/51704/3134/3162/3553/90865/3569/11213/3718/5650/10859/51237/114548/64127/8013/5788/91543/54440/11005                                                                                                | 2<br>8 |
| B<br>P | GO:00<br>18108 | peptidyl-tyro<br>sine<br>phosphoryla<br>tion                                     | 48/92<br>6 | 346/1791<br>3 | 4.<br>14<br>E-<br>10 | 1.<br>52<br>E-<br>08 | 1.12E-08 | 150/389658/374/55024/640/695/6352/948/916/960/972/941/1436/5168/2048/2069/2209/2261/2322/51704/1839/3055/3059/3383/3481/3595/11009/133396/3569/3689/3718/3932/353514/4038/653361/3084/5788/5649/5979/6098/64092/9021/80725/26228/54209/7273/7422/7535 | 4<br>8 |
| B<br>P | GO:00<br>32652 | regulation of<br>interleukin-1<br>production                                     | 23/92<br>6 | 96/17913      | 4.<br>57<br>E-<br>10 | 1.<br>67<br>E-<br>08 | 1.23E-08 | 54/9447/301/384/6363/6348/1236/1958/84868/3428/7850/353514/4023/4210/22861/114548/64127/5027/140885/51311/7128/54209/7305                                                                                                                             | 2<br>3 |
| B<br>P | GO:00<br>32675 | regulation of<br>interleukin-6<br>production                                     | 28/92<br>6 | 139/1791<br>3 | 4.<br>63<br>E-<br>10 | 1.<br>68<br>E-<br>08 | 1.24E-08 | 199/55024/948/2069/2207/84868/3553/3556/90865/3569/11213/353514/10288/4023/3071/197358/64127/5027/26191/140885/6504/7096/7097/10333/51311/7128/54209/7305                                                                                             | 2<br>8 |
| B<br>P | GO:00<br>30183 | B cell<br>differentiatio<br>n                                                    | 25/92<br>6 | 113/1791<br>3 | 4.<br>97<br>E-<br>10 | 1.<br>79<br>E-<br>08 | 1.32E-08 | 100/222487/695/930/939/973/1380/55619/139818/2213/115352/2322/1880/9734/22806/3676/9452/3718/931/3071/150372/23228/5788/56833/7412                                                                                                                    | 2<br>5 |
| B<br>P | GO:00<br>50866 | negative<br>regulation of<br>cell<br>activation                                  | 33/92<br>6 | 187/1791<br>3 | 5.<br>13<br>E-<br>10 | 1.<br>82<br>E-<br>08 | 1.35E-08 | 301/348/384/55024/695/729230/29126/972/8832/1493/2213/2729/10457/84868/3134/3162/3620/3559/133396/3718/3902/54900/10859/10288/4332/80380/26191/5788/9750/64092/7128/7305/11326                                                                        | 3<br>3 |
| B<br>P | GO:00<br>43030 | regulation of<br>macrophage<br>activation                                        | 19/92<br>6 | 66/17913      | 5.<br>15<br>E-       | 1.<br>82<br>E-       | 1.35E-08 | 712/728/6348/972/2213/84868/9173/133396/90865/3569/3684/3689/120892/5788/6622/26228/10333/54209/11326                                                                                                                                                 | 1<br>9 |

|        |                |                                                                                                   |            |               |                      |                      |          |                                                                                                                                                                                                                                                                       |        |
|--------|----------------|---------------------------------------------------------------------------------------------------|------------|---------------|----------------------|----------------------|----------|-----------------------------------------------------------------------------------------------------------------------------------------------------------------------------------------------------------------------------------------------------------------------|--------|
|        |                |                                                                                                   |            |               | 10                   | 08                   |          |                                                                                                                                                                                                                                                                       |        |
| B<br>P | GO:00<br>19932 | second-mes<br>senger-medi<br>ated<br>signaling                                                    | 49/92<br>6 | 360/1791<br>3 | 5.<br>28<br>E-<br>10 | 1.<br>86<br>E-<br>08 | 1.37E-08 | 100/107/113/150/348/695/6364/6348/6351/933/948/916/362<br>7/6373/3576/4283/7852/1906/2357/2358/2633/8477/27201/2<br>903/2904/120892/79772/4502/9722/3084/5027/5031/10846/<br>5140/5341/5788/51655/1827/5997/6401/6403/6662/8600/50<br>852/54209/7253/7412/7422/7535   | 4<br>9 |
| B<br>P | GO:00<br>02690 | positive<br>regulation of<br>leukocyte<br>chemotaxis                                              | 21/92<br>6 | 81/17913      | 5.<br>44<br>E-<br>10 | 1.<br>89<br>E-<br>08 | 1.39E-08 | 199/719/728/6363/6366/6348/6351/6352/729230/1236/972/3<br>627/10563/3576/1906/2358/3569/3071/7941/5880/9750                                                                                                                                                           | 2<br>1 |
| B<br>P | GO:19<br>03557 | positive<br>regulation of<br>tumor<br>necrosis<br>factor<br>superfamily<br>cytokine<br>production | 21/92<br>6 | 81/17913      | 5.<br>44<br>E-<br>10 | 1.<br>89<br>E-<br>08 | 1.39E-08 | 6363/6348/729230/929/914/948/942/1536/2207/84868/3535<br>14/4023/120892/23643/64127/5788/10125/54440/7096/7097<br>/7305                                                                                                                                               | 2<br>1 |
| B<br>P | GO:00<br>18212 | peptidyl-tyro<br>sine<br>modification                                                             | 48/92<br>6 | 349/1791<br>3 | 5.<br>57<br>E-<br>10 | 1.<br>92<br>E-<br>08 | 1.42E-08 | 150/389658/374/55024/640/695/6352/948/916/960/972/941/<br>1436/5168/2048/2069/2209/2261/2322/51704/1839/3055/30<br>59/3383/3481/3595/11009/133396/3569/3689/3718/3932/35<br>3514/4038/653361/3084/5788/5649/5979/6098/64092/9021/<br>80725/26228/54209/7273/7422/7535 | 4<br>8 |
| B<br>P | GO:00<br>01909 | leukocyte<br>mediated<br>cytotoxicity                                                             | 23/92<br>6 | 97/17913      | 5.<br>70<br>E-<br>10 | 1.<br>95<br>E-<br>08 | 1.44E-08 | 11151/1776/2213/3002/84868/3134/3383/3594/3575/3684/3<br>902/10859/5027/5551/5788/10125/5272/4068/114836/57823<br>/26228/7305/7409                                                                                                                                    | 2<br>3 |
| B<br>P | GO:00<br>06968 | cellular<br>defense<br>response                                                                   | 17/92<br>6 | 53/17913      | 6.<br>46<br>E-<br>10 | 2.<br>20<br>E-<br>08 | 1.62E-08 | 728/729230/4283/9214/10578/3702/3822/10288/4046/23643<br>/4332/653361/4688/5551/4068/50852/7305                                                                                                                                                                       | 1<br>7 |
| B<br>P | GO:00<br>31341 | regulation of<br>cell killing                                                                     | 21/92<br>6 | 82/17913      | 6.<br>96<br>E-<br>10 | 2.<br>35<br>E-<br>08 | 1.74E-08 | 1776/2208/2213/84868/3134/3383/3594/3575/3684/3902/10<br>859/5027/5551/5788/10125/5272/4068/114836/26228/7305/<br>7409                                                                                                                                                | 2<br>1 |
| B      | GO:19          | positive                                                                                          | 28/92      | 143/1791      | 9.                   | 3.                   | 2.27E-08 | 100/301/695/6363/939/972/941/942/1960/2124/3059/3594/3                                                                                                                                                                                                                | 2      |

|        |                |                                                                  |            |               |                      |                      |          |                                                                                                                                                                                                                                                               |        |
|--------|----------------|------------------------------------------------------------------|------------|---------------|----------------------|----------------------|----------|---------------------------------------------------------------------------------------------------------------------------------------------------------------------------------------------------------------------------------------------------------------|--------|
| P      | 02107          | regulation of leukocyte differentiation                          | 6          | 3             | 17<br>E-<br>10       | 08<br>E-<br>08       |          | 559/3575/3725/10288/11006/3071/114548/5788/10125/54440/9840/8600/9760/54209/7305/7535                                                                                                                                                                         | 8      |
| B<br>P | GO:00<br>34113 | heterotypic cell-cell adhesion                                   | 18/92<br>6 | 61/17913      | 9.<br>41<br>E-<br>10 | 3.<br>14<br>E-<br>08 | 2.32E-08 | 655/914/960/1525/1824/1829/2651/3553/3676/3687/3689/3932/10288/4897/64065/5788/140885/7412                                                                                                                                                                    | 1<br>8 |
| B<br>P | GO:00<br>02920 | regulation of humoral immune response                            | 27/92<br>6 | 135/1791<br>3 | 1.<br>12<br>E-<br>09 | 3.<br>70<br>E-<br>08 | 2.73E-08 | 712/713/714/717/718/719/720/721/728/730/1236/930/629/3426/1378/1380/10563/2208/2213/3553/5650/5788/710/11005/124976/55061/11326                                                                                                                               | 2<br>7 |
| B<br>P | GO:00<br>51897 | positive regulation of protein kinase B signaling                | 31/92<br>6 | 173/1791<br>3 | 1.<br>16<br>E-<br>09 | 3.<br>82<br>E-<br>08 | 2.82E-08 | 374/6363/6366/6348/1236/930/940/941/942/1116/2069/2099/2152/2261/2651/1839/3059/29851/3481/3932/3084/145957/118788/5293/5294/23533/5880/5979/8600/50852/7409                                                                                                  | 3<br>1 |
| B<br>P | GO:00<br>02478 | antigen processing and presentation of exogenous peptide antigen | 31/92<br>6 | 174/1791<br>3 | 1.<br>34<br>E-<br>09 | 4.<br>40<br>E-<br>08 | 3.25E-08 | 948/972/1514/1536/2209/2213/3105/3106/3107/3108/3109/3112/3113/3115/3118/3119/3120/3122/3123/3125/3134/3136/10437/3902/653361/4688/4689/5696/5698/6890/6891                                                                                                   | 3<br>1 |
| B<br>P | GO:00<br>52548 | regulation of endopeptidase activity                             | 49/92<br>6 | 370/1791<br>3 | 1.<br>36<br>E-<br>09 | 4.<br>40<br>E-<br>08 | 3.25E-08 | 9447/653145/274/330/718/720/721/135228/939/960/340267/1285/1378/1476/26999/1800/112399/2152/355/2903/2904/3428/2537/27074/3932/4018/4057/4210/4318/4804/22861/114548/89932/64065/5266/5329/5696/5698/6091/6279/5272/6622/11005/9806/50859/7035/7980/8626/7422 | 4<br>9 |
| B<br>P | GO:00<br>45621 | positive regulation of lymphocyte differentiation                | 22/92<br>6 | 93/17913      | 1.<br>41<br>E-<br>09 | 4.<br>56<br>E-<br>08 | 3.37E-08 | 100/301/695/6363/939/972/941/942/1960/3594/3559/3575/10288/11006/3071/114548/5788/10125/54440/9840/9760/7535                                                                                                                                                  | 2<br>2 |
| B      | GO:00          | regulation of                                                    | 58/92      | 480/1791      | 1.                   | 4.                   | 3.46E-08 | 107/30817/150/301/321/8862/341/348/8938/274/717/718/72                                                                                                                                                                                                        | 5      |

|        |                |                                                          |            |               |                      |                      |          |                                                                                                                                                                                                                                           |        |
|--------|----------------|----------------------------------------------------------|------------|---------------|----------------------|----------------------|----------|-------------------------------------------------------------------------------------------------------------------------------------------------------------------------------------------------------------------------------------------|--------|
| P      | 60627          | vesicle-mediated transport                               | 6          | 3             | 46<br>E-<br>09       | 69<br>E-<br>08       |          | 0/721/6363/6347/6366/729230/929/933/948/8832/11151/1601/9829/1794/2207/2213/2358/3055/3134/3162/3553/3560/3561/3684/3689/10859/120892/79772/4478/3071/5579/5788/5806/5874/5880/6401/140885/6556/9892/6622/26228/85439/6812/7097/7422/7447 | 8      |
| B<br>P | GO:00<br>42035 | regulation of cytokine biosynthetic process              | 24/92<br>6 | 110/1791<br>3 | 1.<br>49<br>E-<br>09 | 4.<br>74<br>E-<br>08 | 3.50E-08 | 729230/940/916/941/942/1536/1958/2069/3162/10643/3553/3569/3662/3902/10859/4050/5588/5788/7096/10333/51284/51311/7305/7538                                                                                                                | 2<br>4 |
| B<br>P | GO:00<br>01906 | cell killing                                             | 29/92<br>6 | 156/1791<br>3 | 1.<br>64<br>E-<br>09 | 5.<br>21<br>E-<br>08 | 3.85E-08 | 718/6357/11151/1776/2208/2213/10578/3002/84868/3134/3383/3594/3575/3684/3902/10859/4057/4069/5027/5551/5788/10125/5272/4068/114836/57823/26228/7305/7409                                                                                  | 2<br>9 |
| B<br>P | GO:00<br>32760 | positive regulation of tumor necrosis factor production  | 20/92<br>6 | 78/17913      | 1.<br>73<br>E-<br>09 | 5.<br>45<br>E-<br>08 | 4.02E-08 | 6363/6348/729230/929/914/948/1536/2207/84868/353514/4023/120892/23643/64127/5788/10125/54440/7096/7097/7305                                                                                                                               | 2<br>0 |
| B<br>P | GO:00<br>19884 | antigen processing and presentation of exogenous antigen | 31/92<br>6 | 176/1791<br>3 | 1.<br>80<br>E-<br>09 | 5.<br>62<br>E-<br>08 | 4.15E-08 | 948/972/1514/1536/2209/2213/3105/3106/3107/3108/3109/3112/3113/3115/3118/3119/3120/3122/3123/3125/3134/3136/10437/3902/653361/4688/4689/5696/5698/6890/6891                                                                               | 3<br>1 |
| B<br>P | GO:00<br>42089 | cytokine biosynthetic process                            | 25/92<br>6 | 120/1791<br>3 | 1.<br>89<br>E-<br>09 | 5.<br>88<br>E-<br>08 | 4.34E-08 | 729230/940/916/941/942/1536/1958/2069/3162/10643/3553/3556/3569/3662/3902/10859/4050/5588/5788/7096/10333/51284/51311/7305/7538                                                                                                           | 2<br>5 |
| B<br>P | GO:00<br>70372 | regulation of ERK1 and ERK2 cascade                      | 40/92<br>6 | 271/1791<br>3 | 1.<br>97<br>E-<br>09 | 6.<br>07<br>E-<br>08 | 4.48E-08 | 389658/348/467/728/6363/6366/6348/1236/948/960/972/1116/1436/1843/2048/2261/2358/64762/2633/2651/10457/1880/84868/3383/3553/3725/8685/64127/5031/26191/5788/10125/6098/27330/388325/57556/140885/6504/8600/54209                          | 4<br>0 |
| B<br>P | GO:00<br>52547 | regulation of peptidase                                  | 51/92<br>6 | 398/1791<br>3 | 1.<br>98             | 6.<br>07             | 4.48E-08 | 9447/653145/274/330/718/720/721/135228/939/960/340267/1285/1378/1476/26999/1800/112399/2152/355/2903/2904/3                                                                                                                               | 5<br>1 |



|        |                | activity                                            |            |           | E-09                 | E-08                 |          |                                                                                                                                                                                                                                              |        |
|--------|----------------|-----------------------------------------------------|------------|-----------|----------------------|----------------------|----------|----------------------------------------------------------------------------------------------------------------------------------------------------------------------------------------------------------------------------------------------|--------|
| B<br>P | GO:00<br>99024 | plasma<br>membrane<br>invagination                  | 16/92<br>6 | 50/17913  | 2.<br>14<br>E-<br>09 | 6.<br>55<br>E-<br>08 | 4.83E-08 | 428/2537/27074/3932/4018/4057/4210/4318/4804/22861/114548/89932/26577/64065/51050/5266/5329/5696/5698/6091/6279/5272/6622/11005/9806/50859/7035/7980/8626/7422                                                                               | 1<br>6 |
| B<br>P | GO:00<br>42107 | cytokine<br>metabolic<br>process                    | 25/92<br>6 | 121/17913 | 2.<br>27<br>E-<br>09 | 6.<br>89<br>E-<br>08 | 5.08E-08 | 729230/940/916/941/942/1536/1958/2069/3162/10643/3553/3556/3569/3662/3902/10859/4050/5588/5788/7096/10333/51284/51311/7305/7538                                                                                                              | 2<br>5 |
| B<br>P | GO:00<br>32635 | interleukin-6<br>production                         | 28/92<br>6 | 149/17913 | 2.<br>43<br>E-<br>09 | 7.<br>34<br>E-<br>08 | 5.42E-08 | 199/55024/948/2069/2207/84868/3553/3556/90865/3569/11213/353514/10288/4023/3071/197358/64127/5027/26191/140885/6504/7096/7097/10333/51311/7128/54209/7305                                                                                    | 2<br>8 |
| B<br>P | GO:00<br>48872 | homeostasi<br>s of number<br>of cells               | 37/92<br>6 | 241/17913 | 2.<br>66<br>E-<br>09 | 7.<br>97<br>E-<br>08 | 5.88E-08 | 100/10000/301/729230/1233/1236/972/1021/11151/55619/139818/2207/2322/84636/1880/3059/3162/3216/3304/10320/3559/3569/3575/3718/3071/5027/5142/5293/54440/6662/6688/124976/7128/10673/1831/7422/7538                                           | 3<br>7 |
| B<br>P | GO:00<br>02218 | activation of<br>innate<br>immune<br>response       | 44/92<br>6 | 319/17913 | 2.<br>68<br>E-<br>09 | 7.<br>99<br>E-<br>08 | 5.90E-08 | 9447/330/695/929/30835/948/10462/64581/1514/55601/2099/2207/2219/115352/84868/3055/3304/3428/11213/3662/3684/3689/4057/23643/8685/4332/94025/4583/64127/5063/118788/5696/5698/26191/149628/91543/6279/7096/81793/7097/10333/51284/51311/7128 | 4<br>4 |
| B<br>P | GO:00<br>42094 | interleukin-2<br>biosynthetic<br>process            | 11/92<br>6 | 22/17913  | 2.<br>77<br>E-<br>09 | 8.<br>22<br>E-<br>08 | 6.07E-08 | 940/916/941/942/3553/3556/3662/3902/5588/5788/7538                                                                                                                                                                                           | 1<br>1 |
| B<br>P | GO:00<br>50702 | interleukin-1<br>beta<br>secretion                  | 16/92<br>6 | 51/17913  | 2.<br>98<br>E-<br>09 | 8.<br>77<br>E-<br>08 | 6.47E-08 | 9447/384/6363/6348/1236/948/115362/353514/4023/22861/114548/64127/5027/10333/51311/7128                                                                                                                                                      | 1<br>6 |
| B<br>P | GO:00<br>02673 | regulation of<br>acute<br>inflammator<br>y response | 29/92<br>6 | 160/17913 | 3.<br>03<br>E-<br>09 | 8.<br>87<br>E-<br>08 | 6.55E-08 | 695/712/713/714/717/718/719/720/721/728/730/1236/930/629/3426/1378/1380/1776/2207/2213/3553/3569/114548/9180/5294/710/55061/8600/11326                                                                                                       | 2<br>9 |

|        |                |                                                               |            |               |                      |                      |          |                                                                                                                                                                                                                       |        |
|--------|----------------|---------------------------------------------------------------|------------|---------------|----------------------|----------------------|----------|-----------------------------------------------------------------------------------------------------------------------------------------------------------------------------------------------------------------------|--------|
| B<br>P | GO:00<br>45807 | positive<br>regulation of<br>endocytosis                      | 27/92<br>6 | 141/1791<br>3 | 3.<br>05<br>E-<br>09 | 8.<br>89<br>E-<br>08 | 6.56E-08 | 8862/348/717/718/720/721/6363/6347/6366/929/948/1601/1794/2213/2358/3553/3560/3561/120892/3071/5788/5806/6401/6556/6622/26228/7422                                                                                    | 2<br>7 |
| B<br>P | GO:00<br>51250 | negative<br>regulation of<br>lymphocyte<br>activation         | 26/92<br>6 | 132/1791<br>3 | 3.<br>19<br>E-<br>09 | 9.<br>25<br>E-<br>08 | 6.82E-08 | 301/384/55024/695/29126/972/1493/2213/10457/84868/3134/3620/3559/3718/3902/54900/10859/10288/4332/80380/26191/9750/64092/7128/7305/11326                                                                              | 2<br>6 |
| B<br>P | GO:00<br>70371 | ERK1 and<br>ERK2<br>cascade                                   | 41/92<br>6 | 289/1791<br>3 | 4.<br>07<br>E-<br>09 | 1.<br>17<br>E-<br>07 | 8.66E-08 | 389658/348/467/728/6363/6366/6348/1236/948/960/972/1116/1436/1843/2048/2261/2358/64762/2633/2651/10457/1880/84868/3383/3553/3725/8685/64127/5031/26191/5788/10125/6098/27330/388325/57556/140885/6504/6662/8600/54209 | 4<br>1 |
| B<br>P | GO:00<br>50730 | regulation of<br>peptidyl-tyro<br>sine<br>phosphoryla<br>tion | 37/92<br>6 | 245/1791<br>3 | 4.<br>21<br>E-<br>09 | 1.<br>21<br>E-<br>07 | 8.90E-08 | 150/389658/374/55024/6352/948/916/960/972/941/1436/5168/2069/2209/2261/2322/51704/1839/3059/3383/3481/11009/133396/3569/3689/353514/4038/653361/3084/5788/5649/64092/9021/80725/26228/54209/7422                      | 3<br>7 |
| B<br>P | GO:00<br>46634 | regulation of<br>alpha-beta T<br>cell<br>activation           | 21/92<br>6 | 90/17913      | 4.<br>35<br>E-<br>09 | 1.<br>24<br>E-<br>07 | 9.11E-08 | 100/301/384/6363/729230/29126/940/916/941/942/3594/3662/3718/10859/3071/114548/639/5588/5788/54440/7535                                                                                                               | 2<br>1 |
| B<br>P | GO:00<br>32651 | regulation of<br>interleukin-1<br>beta<br>production          | 20/92<br>6 | 82/17913      | 4.<br>46<br>E-<br>09 | 1.<br>24<br>E-<br>07 | 9.11E-08 | 54/9447/384/6363/6348/1236/1958/3428/353514/4023/4210/22861/114548/64127/5027/140885/51311/7128/54209/7305                                                                                                            | 2<br>0 |
| B<br>P | GO:00<br>30260 | entry into<br>host cell                                       | 26/92<br>6 | 134/1791<br>3 | 4.<br>46<br>E-<br>09 | 1.<br>24<br>E-<br>07 | 9.11E-08 | 290/30835/972/941/942/999/10332/1378/1380/1525/3576/7852/1803/2219/2838/3304/3383/8519/10581/10410/4360/5818/5806/6404/6504/11074                                                                                     | 2<br>6 |
| B<br>P | GO:00<br>44409 | entry into<br>host                                            | 26/92<br>6 | 134/1791<br>3 | 4.<br>46<br>E-<br>09 | 1.<br>24<br>E-<br>07 | 9.11E-08 | 290/30835/972/941/942/999/10332/1378/1380/1525/3576/7852/1803/2219/2838/3304/3383/8519/10581/10410/4360/5818/5806/6404/6504/11074                                                                                     | 2<br>6 |
| B<br>P | GO:00<br>51806 | entry into<br>cell of other<br>organism                       | 26/92<br>6 | 134/1791<br>3 | 4.<br>46<br>E-<br>09 | 1.<br>24<br>E-<br>07 | 9.11E-08 | 290/30835/972/941/942/999/10332/1378/1380/1525/3576/7852/1803/2219/2838/3304/3383/8519/10581/10410/4360/5818/5806/6404/6504/11074                                                                                     | 2<br>6 |

|        |                |                                                             |            |               |                      |                      |          |                                                                                                                                   |        |
|--------|----------------|-------------------------------------------------------------|------------|---------------|----------------------|----------------------|----------|-----------------------------------------------------------------------------------------------------------------------------------|--------|
|        |                | involved in symbiotic interaction                           |            |               | 09                   | 07                   |          |                                                                                                                                   |        |
| B<br>P | GO:00<br>51828 | entry into other organism involved in symbiotic interaction | 26/92<br>6 | 134/1791<br>3 | 4.<br>46<br>E-<br>09 | 1.<br>24<br>E-<br>07 | 9.11E-08 | 290/30835/972/941/942/999/10332/1378/1380/1525/3576/7852/1803/2219/2838/3304/3383/8519/10581/10410/4360/5818/5806/6404/6504/11074 | 2<br>6 |
| B<br>P | GO:00<br>02698 | negative regulation of immune effector process              | 24/92<br>6 | 116/1791<br>3 | 4.<br>60<br>E-<br>09 | 1.<br>27<br>E-<br>07 | 9.36E-08 | 301/729230/933/8832/10225/1378/2213/115352/10875/84868/3134/3162/3559/90865/3575/11213/3718/10859/5788/5272/710/56833/11005/11326 | 2<br>4 |
| B<br>P | GO:00<br>50701 | interleukin-1 secretion                                     | 17/92<br>6 | 60/17913      | 5.<br>49<br>E-<br>09 | 1.<br>48<br>E-<br>07 | 1.09E-07 | 9447/384/6363/6348/1236/948/115362/7850/353514/4023/2861/114548/64127/5027/10333/51311/7128                                       | 1<br>7 |
| B<br>P | GO:00<br>50766 | positive regulation of phagocytosis                         | 17/92<br>6 | 60/17913      | 5.<br>49<br>E-<br>09 | 1.<br>48<br>E-<br>07 | 1.09E-07 | 717/718/720/721/6347/948/1794/2213/2358/3553/3560/3561/3071/5788/5806/6556/26228                                                  | 1<br>7 |
| B<br>P | GO:19<br>90868 | response to chemokine                                       | 17/92<br>6 | 60/17913      | 5.<br>49<br>E-<br>09 | 1.<br>48<br>E-<br>07 | 1.09E-07 | 2532/6366/6352/729230/1233/1236/3627/6373/3577/7852/10663/1843/1906/11240/9750/6091/54209                                         | 1<br>7 |
| B<br>P | GO:19<br>90869 | cellular response to chemokine                              | 17/92<br>6 | 60/17913      | 5.<br>49<br>E-<br>09 | 1.<br>48<br>E-<br>07 | 1.09E-07 | 2532/6366/6352/729230/1233/1236/3627/6373/3577/7852/10663/1843/1906/11240/9750/6091/54209                                         | 1<br>7 |
| B<br>P | GO:00<br>45582 | positive regulation of T cell differentiation               | 20/92<br>6 | 83/17913      | 5.<br>59<br>E-<br>09 | 1.<br>50<br>E-<br>07 | 1.11E-07 | 100/301/6363/939/972/941/942/1960/3594/3559/3575/10288/11006/3071/114548/5788/10125/54440/9840/7535                               | 2<br>0 |
| B      | GO:00          | negative                                                    | 35/92      | 226/1791      | 5.                   | 1.                   | 1.11E-07 | 100/150/84830/301/348/384/55024/729230/933/972/8832/19                                                                            | 3      |

|        |                |                                                                  |            |               |                      |                      |          |                                                                                                                                                                                             |        |
|--------|----------------|------------------------------------------------------------------|------------|---------------|----------------------|----------------------|----------|---------------------------------------------------------------------------------------------------------------------------------------------------------------------------------------------|--------|
| P      | 51048          | regulation of secretion                                          | 6          | 3             | 66<br>E-<br>09       | 51<br>E-<br>07       |          | 06/2213/2633/9734/3134/3162/3553/7850/90865/353514/10859/4129/114548/3084/55607/26191/91543/6622/80725/5552/10333/51311/7128/7447                                                           | 5      |
| B<br>P | GO:19<br>02622 | regulation of neutrophil migration                               | 13/92<br>6 | 34/17913      | 5.<br>83<br>E-<br>09 | 1.<br>55<br>E-<br>07 | 1.14E-07 | 719/728/6363/6366/1236/972/3576/1906/4354/3071/5880/9750/56833                                                                                                                              | 1<br>3 |
| B<br>P | GO:00<br>71674 | mononuclear cell migration                                       | 18/92<br>6 | 68/17913      | 6.<br>48<br>E-<br>09 | 1.<br>71<br>E-<br>07 | 1.26E-07 | 199/301/719/728/6347/6348/6352/729230/3627/1843/2358/3569/120425/7941/5800/140885/56833/8600                                                                                                | 1<br>8 |
| B<br>P | GO:00<br>02604 | regulation of dendritic cell antigen processing and presentation | 8/926      | 11/17913      | 7.<br>11<br>E-<br>09 | 1.<br>85<br>E-<br>07 | 1.37E-07 | 6363/6366/1236/972/2213/10875/64127/6556                                                                                                                                                    | 8      |
| B<br>P | GO:00<br>43383 | negative T cell selection                                        | 8/926      | 11/17913      | 7.<br>11<br>E-<br>09 | 1.<br>85<br>E-<br>07 | 1.37E-07 | 1236/940/916/972/1794/5788/387357/7535                                                                                                                                                      | 8      |
| B<br>P | GO:00<br>70374 | positive regulation of ERK1 and ERK2 cascade                     | 31/92<br>6 | 186/1791<br>3 | 7.<br>12<br>E-<br>09 | 1.<br>85<br>E-<br>07 | 1.37E-07 | 389658/348/728/6363/6366/6348/1236/948/960/972/1116/1436/2261/2358/64762/2651/10457/1880/84868/3383/3725/8685/64127/5031/26191/5788/10125/388325/6504/8600/54209                            | 3<br>1 |
| B<br>P | GO:00<br>45076 | regulation of interleukin-2 biosynthetic process                 | 10/92<br>6 | 19/17913      | 7.<br>83<br>E-<br>09 | 2.<br>03<br>E-<br>07 | 1.50E-07 | 940/916/941/942/3553/3662/3902/5588/5788/7538                                                                                                                                               | 1<br>0 |
| B<br>P | GO:00<br>30100 | regulation of endocytosis                                        | 38/92<br>6 | 262/1791<br>3 | 8.<br>16<br>E-<br>09 | 2.<br>10<br>E-<br>07 | 1.55E-07 | 8862/341/348/274/717/718/720/721/6363/6347/6366/929/933/948/1601/9829/1794/2213/2358/3055/3553/3560/3561/10859/120892/79772/3071/5788/5806/6401/140885/6556/9892/6622/26228/85439/7097/7422 | 3<br>8 |
| B<br>P | GO:00<br>90023 | positive regulation of                                           | 11/92<br>6 | 24/17913      | 8.<br>92             | 2.<br>27             | 1.68E-07 | 719/728/6363/6366/1236/972/3576/1906/3071/5880/9750                                                                                                                                         | 1<br>1 |

|        |                |                                                   |        |           |          |          |          |                                                                                                                                                                                                                                                             |        |
|--------|----------------|---------------------------------------------------|--------|-----------|----------|----------|----------|-------------------------------------------------------------------------------------------------------------------------------------------------------------------------------------------------------------------------------------------------------------|--------|
|        |                | neutrophil chemotaxis                             |        |           | E-09     | E-07     |          |                                                                                                                                                                                                                                                             |        |
| B<br>P | GO:01<br>50078 | positive regulation of neuroinflammatory response | 11/926 | 24/17913  | 8.92E-09 | 2.27E-07 | 1.68E-07 | 712/6348/3553/90865/3569/3684/3689/120892/26471/26228/54209                                                                                                                                                                                                 | 1<br>1 |
| B<br>P | GO:00<br>02793 | positive regulation of peptide secretion          | 39/926 | 275/17913 | 9.84E-09 | 2.49E-07 | 1.84E-07 | 199/9447/27063/8862/8938/640/6363/6348/929/914/29126/952/1436/2219/55612/84868/3553/3556/9173/90865/3569/353514/4023/120892/4321/22861/114548/64127/5027/26191/10125/6279/7096/7097/51311/8600/54209/7273/7447                                              | 3<br>9 |
| B<br>P | GO:00<br>32653 | regulation of interleukin-10 production           | 15/926 | 48/17913  | 9.87E-09 | 2.49E-07 | 1.84E-07 | 29126/940/2207/2213/3620/3662/3718/353514/10859/64127/80380/54440/7097/54209/7305                                                                                                                                                                           | 1<br>5 |
| B<br>P | GO:00<br>51607 | defense response to virus                         | 35/926 | 231/17913 | 1.01E-08 | 2.53E-07 | 1.87E-07 | 9447/330/3627/4283/55601/10875/2633/51191/3428/3429/10964/2537/3434/10410/3594/3553/3559/90865/3569/10859/4321/4599/84166/114548/4939/8638/5551/5788/91543/91607/51284/51311/7128/10346/7728                                                                | 3<br>5 |
| B<br>P | GO:00<br>31295 | T cell costimulation                              | 16/926 | 55/17913  | 1.01E-08 | 2.53E-07 | 1.87E-07 | 6363/6366/1236/29126/940/916/941/942/1493/1803/29851/3932/5063/80380/10673/7409                                                                                                                                                                             | 1<br>6 |
| B<br>P | GO:19<br>03532 | positive regulation of secretion by cell          | 48/926 | 381/17913 | 1.03E-08 | 2.56E-07 | 1.89E-07 | 199/9447/27063/8862/8938/640/6363/6348/929/914/29126/952/1436/1906/2207/2219/55612/84868/3134/3553/3556/9173/90865/3569/3684/3689/8564/353514/4023/120892/4321/22861/114548/64127/5027/26191/5874/10125/6622/6696/6812/7096/7097/51311/8600/54209/7273/7447 | 4<br>8 |
| B<br>P | GO:00<br>46718 | viral entry into host cell                        | 24/926 | 121/17913 | 1.11E-08 | 2.73E-07 | 2.02E-07 | 290/30835/972/941/942/10332/1378/1380/1525/7852/1803/2219/2838/3304/3383/8519/10581/10410/4360/5818/5806/6404/6504/11074                                                                                                                                    | 2<br>4 |
| B<br>P | GO:00<br>30198 | extracellular matrix organization                 | 44/926 | 334/17913 | 1.11E-08 | 2.73E-07 | 2.02E-07 | 8728/56999/54507/84830/146206/960/999/1310/1285/1286/1297/55790/1514/1803/2201/55612/3383/3569/3675/3676/3680/3683/3684/3687/3689/3691/3696/5650/284217/3909/3914/3936/4321/4316/4318/4868/5806/5268/6662/11005/9806/                                       | 4<br>4 |

|        |                |                                                          |            |               |                      |                      |          |                                                                                                                                                                                                                                                                                       |        |
|--------|----------------|----------------------------------------------------------|------------|---------------|----------------------|----------------------|----------|---------------------------------------------------------------------------------------------------------------------------------------------------------------------------------------------------------------------------------------------------------------------------------------|--------|
|        |                |                                                          |            |               |                      |                      |          | 6696/4982/7412                                                                                                                                                                                                                                                                        |        |
| B<br>P | GO:00<br>48247 | lymphocyte<br>chemotaxis                                 | 14/92<br>6 | 42/17913      | 1.<br>20<br>E-<br>08 | 2.<br>94<br>E-<br>07 | 2.17E-07 | 6347/6366/6348/6351/6352/729230/9023/3627/6373/10563/<br>1880/11240/5293/5294                                                                                                                                                                                                         | 1<br>4 |
| B<br>P | GO:00<br>32743 | positive<br>regulation of<br>interleukin-2<br>production | 12/92<br>6 | 30/17913      | 1.<br>24<br>E-<br>08 | 3.<br>00<br>E-<br>07 | 2.21E-07 | 301/729230/940/916/941/942/3553/3662/5142/5588/5788/54<br>440                                                                                                                                                                                                                         | 1<br>2 |
| B<br>P | GO:00<br>90022 | regulation of<br>neutrophil<br>chemotaxis                | 12/92<br>6 | 30/17913      | 1.<br>24<br>E-<br>08 | 3.<br>00<br>E-<br>07 | 2.21E-07 | 719/728/6363/6366/1236/972/3576/1906/4354/3071/5880/97<br>50                                                                                                                                                                                                                          | 1<br>2 |
| B<br>P | GO:00<br>31294 | lymphocyte<br>costimulatio<br>n                          | 16/92<br>6 | 56/17913      | 1.<br>35<br>E-<br>08 | 3.<br>27<br>E-<br>07 | 2.41E-07 | 6363/6366/1236/29126/940/916/941/942/1493/1803/29851/3<br>932/5063/80380/10673/7409                                                                                                                                                                                                   | 1<br>6 |
| B<br>P | GO:00<br>51047 | positive<br>regulation of<br>secretion                   | 50/92<br>6 | 409/1791<br>3 | 1.<br>38<br>E-<br>08 | 3.<br>31<br>E-<br>07 | 2.45E-07 | 199/9447/27063/8862/8938/640/6363/6348/929/914/29126/9<br>52/1436/1906/2207/2219/55612/84868/3134/3553/3556/917<br>3/90865/3569/3684/3689/8564/353514/4023/120892/4321/2<br>2861/114548/64127/5027/5029/26191/5874/10125/6279/662<br>2/6696/6812/7096/7097/51311/8600/54209/7273/7447 | 5<br>0 |
| B<br>P | GO:19<br>03531 | negative<br>regulation of<br>secretion by<br>cell        | 32/92<br>6 | 202/1791<br>3 | 1.<br>46<br>E-<br>08 | 3.<br>48<br>E-<br>07 | 2.57E-07 | 150/84830/301/348/384/55024/729230/933/8832/1906/2213/<br>2633/9734/3134/3162/3553/7850/90865/353514/10859/4129<br>/114548/55607/26191/91543/6622/80725/5552/10333/51311<br>/7128/7447                                                                                                | 3<br>2 |
| B<br>P | GO:00<br>50901 | leukocyte<br>tethering or<br>rolling                     | 11/92<br>6 | 25/17913      | 1.<br>52<br>E-<br>08 | 3.<br>61<br>E-<br>07 | 2.67E-07 | 119/6366/729230/2650/3676/50512/6401/6402/6403/6404/7<br>412                                                                                                                                                                                                                          | 1<br>1 |
| B<br>P | GO:00<br>43491 | protein<br>kinase B<br>signaling                         | 38/92<br>6 | 268/1791<br>3 | 1.<br>53<br>E-<br>08 | 3.<br>62<br>E-<br>07 | 2.67E-07 | 84830/374/55024/6363/6347/6366/6348/6352/1236/930/940/<br>941/942/1116/2069/2099/2152/2261/2651/1839/3059/29851/<br>3481/3553/3932/3084/145957/118788/5293/5294/23533/588<br>0/5979/143686/6662/8600/50852/7409                                                                       | 3<br>8 |
| B<br>P | GO:00<br>48667 | cell<br>morphogen                                        | 57/92<br>6 | 500/1791<br>3 | 1.<br>69             | 3.<br>99             | 2.95E-07 | 107/575/348/655/1952/10752/23242/1436/7852/1630/9201/1<br>749/55619/1959/2048/2297/23105/2674/2817/3676/3792/38                                                                                                                                                                       | 5<br>7 |

|        |            |                                                    |        |          |          |          |          |                                                                                                                                                                                                |    |
|--------|------------|----------------------------------------------------|--------|----------|----------|----------|----------|------------------------------------------------------------------------------------------------------------------------------------------------------------------------------------------------|----|
|        |            | esis involved in neuron differentiation            |        |          | E-08     | E-07     |          | 97/23566/4038/120892/4647/5818/4744/4781/4804/4929/8013/4897/9423/10439/5063/5293/55607/5588/5800/5649/5979/9750/6091/10371/57556/6507/84189/6696/80725/6812/23043/347733/10381/7345/7422/9839 |    |
| B<br>P | GO:0030888 | regulation of B cell proliferation                 | 16/926 | 57/17913 | 1.79E-08 | 4.21E-07 | 3.10E-07 | 100/695/933/952/972/1493/2213/115352/1880/22806/4332/51237/3071/5788/10673/7305                                                                                                                | 16 |
| B<br>P | GO:002468  | dendritic cell antigen processing and presentation | 8/926  | 12/17913 | 2.04E-08 | 4.73E-07 | 3.49E-07 | 6363/6366/1236/972/2213/10875/64127/6556                                                                                                                                                       | 8  |
| B<br>P | GO:0070486 | leukocyte aggregation                              | 8/926  | 12/17913 | 2.04E-08 | 4.73E-07 | 3.49E-07 | 655/960/3553/4478/8013/5880/6279/7535                                                                                                                                                          | 8  |
| B<br>P | GO:0010324 | membrane invagination                              | 16/926 | 58/17913 | 2.36E-08 | 5.46E-07 | 4.03E-07 | 575/199/51411/718/948/9844/2207/2209/2213/3684/3689/8685/4481/3071/26228/54209                                                                                                                 | 16 |
| B<br>P | GO:002548  | monocyte chemotaxis                                | 14/926 | 44/17913 | 2.37E-08 | 5.46E-07 | 4.03E-07 | 199/301/6347/6348/6352/729230/3627/1843/2358/3569/7941/5800/56833/8600                                                                                                                         | 14 |
| B<br>P | GO:0050764 | regulation of phagocytosis                         | 20/926 | 90/17913 | 2.47E-08 | 5.65E-07 | 4.17E-07 | 717/718/720/721/6347/948/1794/2213/2358/3055/3553/3560/3561/3071/5788/5806/140885/6556/26228/7097                                                                                              | 20 |
| B<br>P | GO:0032613 | interleukin-10 production                          | 15/926 | 51/17913 | 2.49E-08 | 5.65E-07 | 4.17E-07 | 29126/940/2207/2213/3620/3662/3718/353514/10859/64127/80380/54440/7097/54209/7305                                                                                                              | 15 |
| B<br>P | GO:0070098 | chemokine-mediated                                 | 15/926 | 51/17913 | 2.49E-08 | 5.65E-07 | 4.17E-07 | 2532/6366/6352/729230/1233/1236/3627/6373/3577/7852/10663/1906/11240/6091/54209                                                                                                                | 15 |

|        |                | signaling pathway                                     |            |               | E-08                 | E-07                 |          |                                                                                                                                                                                                                        |        |
|--------|----------------|-------------------------------------------------------|------------|---------------|----------------------|----------------------|----------|------------------------------------------------------------------------------------------------------------------------------------------------------------------------------------------------------------------------|--------|
| B<br>P | GO:00<br>02825 | regulation of T-helper 1 type immune response         | 11/92<br>6 | 26/17913      | 2.<br>51<br>E-<br>08 | 5.<br>65<br>E-<br>07 | 4.17E-07 | 301/6363/729230/941/84868/3594/3553/9173/90865/3718/6556                                                                                                                                                               | 1<br>1 |
| B<br>P | GO:00<br>71624 | positive regulation of granulocyte chemotaxis         | 11/92<br>6 | 26/17913      | 2.<br>51<br>E-<br>08 | 5.<br>65<br>E-<br>07 | 4.17E-07 | 719/728/6363/6366/1236/972/3576/1906/3071/5880/9750                                                                                                                                                                    | 1<br>1 |
| B<br>P | GO:00<br>02705 | positive regulation of leukocyte mediated immunity    | 23/92<br>6 | 117/1791<br>3 | 2.<br>67<br>E-<br>08 | 5.<br>98<br>E-<br>07 | 4.42E-07 | 695/718/940/2207/2208/3134/3594/3553/3569/3684/3689/3902/114548/64127/5027/5788/10125/91543/54440/4068/114836/6812/7409                                                                                                | 2<br>3 |
| B<br>P | GO:00<br>02221 | pattern recognition receptor signaling pathway        | 31/92<br>6 | 197/1791<br>3 | 2.<br>86<br>E-<br>08 | 6.<br>40<br>E-<br>07 | 4.72E-07 | 330/695/929/948/64581/1514/55601/2099/2219/115352/84868/3304/11213/3662/3684/3689/4057/23643/8685/64127/118788/26191/91543/6279/7096/81793/7097/10333/51284/51311/7128                                                 | 3<br>1 |
| B<br>P | GO:00<br>32633 | interleukin-4 production                              | 12/92<br>6 | 32/17913      | 2.<br>93<br>E-<br>08 | 6.<br>52<br>E-<br>07 | 4.81E-07 | 940/916/942/2207/84868/3556/90865/3662/3702/114548/5588/54440                                                                                                                                                          | 1<br>2 |
| B<br>P | GO:00<br>02758 | innate immune response-activating signal transduction | 40/92<br>6 | 298/1791<br>3 | 3.<br>06<br>E-<br>08 | 6.<br>77<br>E-<br>07 | 5.00E-07 | 330/695/929/30835/948/10462/64581/1514/55601/2099/2207/2219/115352/84868/3055/3304/11213/3662/3684/3689/4057/23643/8685/94025/4583/64127/5063/118788/5696/5698/26191/91543/6279/7096/81793/7097/10333/51284/51311/7128 | 4<br>0 |
| B<br>P | GO:00<br>45058 | T cell selection                                      | 14/92<br>6 | 45/17913      | 3.<br>28<br>E-<br>08 | 7.<br>23<br>E-<br>07 | 5.33E-07 | 1236/940/915/916/972/1794/3594/3569/3662/4063/5788/114836/387357/7535                                                                                                                                                  | 1<br>4 |
| B      | GO:00          | regulation of                                         | 19/92      | 83/17913      | 3.                   | 7.                   | 5.34E-07 | 695/729230/948/972/10225/2207/51704/3134/3162/3553/35                                                                                                                                                                  | 1      |



|        |                |                                                   |            |               |                      |                      |          |                                                                                                                                                                                                                                                           |        |
|--------|----------------|---------------------------------------------------|------------|---------------|----------------------|----------------------|----------|-----------------------------------------------------------------------------------------------------------------------------------------------------------------------------------------------------------------------------------------------------------|--------|
| P      | 02718          | cytokine production involved in immune response   | 6          |               | 30<br>E-<br>08       | 24<br>E-<br>07       |          | 69/11213/3718/10859/114548/64127/8013/91543/54440                                                                                                                                                                                                         | 9      |
| B<br>P | GO:00<br>43900 | regulation of multi-organism process              | 49/92<br>6 | 408/1791<br>3 | 3.<br>41<br>E-<br>08 | 7.<br>44<br>E-<br>07 | 5.49E-07 | 100/9447/348/384/330/6348/6351/6352/4064/940/948/972/3576/7852/55601/2208/2219/10875/84868/51191/8091/3428/3429/3434/8519/10581/10410/3594/3553/3559/3394/3725/5650/27074/10859/4057/23643/4321/4599/8638/5027/5551/5806/91543/11005/6812/7128/11074/7538 | 4<br>9 |
| B<br>P | GO:00<br>02367 | cytokine production involved in immune response   | 21/92<br>6 | 101/1791<br>3 | 3.<br>84<br>E-<br>08 | 8.<br>36<br>E-<br>07 | 6.17E-07 | 695/729230/948/972/10225/2207/51704/3134/3162/3553/3569/11213/3718/10859/114548/64127/8013/91543/54440/6556/7097                                                                                                                                          | 2<br>1 |
| B<br>P | GO:19<br>02624 | positive regulation of neutrophil migration       | 11/92<br>6 | 27/17913      | 4.<br>04<br>E-<br>08 | 8.<br>74<br>E-<br>07 | 6.45E-07 | 719/728/6363/6366/1236/972/3576/1906/3071/5880/9750                                                                                                                                                                                                       | 1<br>1 |
| B<br>P | GO:00<br>70233 | negative regulation of T cell apoptotic process   | 9/926      | 17/17913      | 4.<br>24<br>E-<br>08 | 9.<br>14<br>E-<br>07 | 6.74E-07 | 100/384/6352/939/3620/3575/3718/5588/1831                                                                                                                                                                                                                 | 9      |
| B<br>P | GO:00<br>32655 | regulation of interleukin-12 production           | 15/92<br>6 | 53/17913      | 4.<br>43<br>E-<br>08 | 9.<br>51<br>E-<br>07 | 7.02E-07 | 54/6363/1236/948/3620/11213/3394/3718/353514/10859/4050/4210/6504/7097/51311                                                                                                                                                                              | 1<br>5 |
| B<br>P | GO:00<br>50714 | positive regulation of protein secretion          | 36/92<br>6 | 256/1791<br>3 | 4.<br>53<br>E-<br>08 | 9.<br>69<br>E-<br>07 | 7.15E-07 | 199/9447/27063/8938/640/6363/6348/929/914/29126/952/1436/2219/55612/84868/3553/3556/9173/90865/3569/353514/4023/120892/4321/22861/114548/64127/5027/26191/10125/7096/7097/51311/54209/7273/7447                                                           | 3<br>6 |
| B<br>P | GO:00<br>45086 | positive regulation of interleukin-2 biosynthetic | 8/926      | 13/17913      | 5.<br>05<br>E-<br>08 | 1.<br>08<br>E-<br>06 | 7.94E-07 | 940/916/941/942/3553/3662/5588/5788                                                                                                                                                                                                                       | 8      |

|        |                | process                                                        |            |               |                      |                      |          |                                                                                                                                                                                                                                                  |        |
|--------|----------------|----------------------------------------------------------------|------------|---------------|----------------------|----------------------|----------|--------------------------------------------------------------------------------------------------------------------------------------------------------------------------------------------------------------------------------------------------|--------|
| B<br>P | GO:19<br>03708 | positive<br>regulation of<br>hemopoiesi<br>s                   | 29/92<br>6 | 182/1791<br>3 | 6.<br>03<br>E-<br>08 | 1.<br>28<br>E-<br>06 | 9.44E-07 | 100/301/695/6363/939/972/941/942/1960/2124/3059/3304/3594/3559/3575/3725/10288/11006/3071/114548/5788/10125/54440/9840/8600/9760/54209/7305/7535                                                                                                 | 2<br>9 |
| B<br>P | GO:00<br>50855 | regulation of<br>B cell<br>receptor<br>signaling<br>pathway    | 11/92<br>6 | 28/17913      | 6.<br>34<br>E-<br>08 | 1.<br>34<br>E-<br>06 | 9.88E-07 | 640/930/933/2213/115352/150372/5079/23228/5579/26191/26228                                                                                                                                                                                       | 1<br>1 |
| B<br>P | GO:00<br>45730 | respiratory<br>burst                                           | 12/92<br>6 | 34/17913      | 6.<br>47<br>E-<br>08 | 1.<br>36<br>E-<br>06 | 1.00E-06 | 1043/1536/3055/3512/653361/4688/4689/5293/5294/5880/56833/6556                                                                                                                                                                                   | 1<br>2 |
| B<br>P | GO:00<br>02792 | negative<br>regulation of<br>peptide<br>secretion              | 25/92<br>6 | 142/1791<br>3 | 6.<br>69<br>E-<br>08 | 1.<br>40<br>E-<br>06 | 1.03E-06 | 150/84830/301/348/384/55024/933/972/2213/2633/9734/3553/7850/90865/353514/10859/114548/26191/91543/80725/5552/10333/51311/7128/7447                                                                                                              | 2<br>5 |
| B<br>P | GO:00<br>07409 | axonogenes<br>is                                               | 47/92<br>6 | 393/1791<br>3 | 7.<br>39<br>E-<br>08 | 1.<br>54<br>E-<br>06 | 1.14E-06 | 107/575/348/655/10752/23242/1436/7852/1630/9201/1749/1959/2048/2297/23105/2674/2817/3676/3792/3897/23566/4038/5818/4744/4781/4804/4929/8013/4897/9423/10439/5063/5293/5588/5800/5649/5979/6091/10371/57556/6696/6812/347733/10381/7345/7422/9839 | 4<br>7 |
| B<br>P | GO:00<br>32615 | interleukin-1<br>2 production                                  | 15/92<br>6 | 55/17913      | 7.<br>65<br>E-<br>08 | 1.<br>59<br>E-<br>06 | 1.17E-06 | 54/6363/1236/948/3620/11213/3394/3718/353514/10859/4050/4210/6504/7097/51311                                                                                                                                                                     | 1<br>5 |
| B<br>P | GO:00<br>32753 | positive<br>regulation of<br>interleukin-4<br>production       | 10/92<br>6 | 23/17913      | 8.<br>03<br>E-<br>08 | 1.<br>66<br>E-<br>06 | 1.23E-06 | 940/916/942/2207/84868/90865/3662/114548/5588/54440                                                                                                                                                                                              | 1<br>0 |
| B<br>P | GO:00<br>02291 | T cell<br>activation<br>via T cell<br>receptor<br>contact with | 7/926      | 10/17913      | 1.<br>01<br>E-<br>07 | 2.<br>07<br>E-<br>06 | 1.53E-06 | 54518/10875/84868/3109/3383/3683/10859                                                                                                                                                                                                           | 7      |

|        |                |                                                          |            |               |                      |                      |          |                                                                                                                                                                |        |
|--------|----------------|----------------------------------------------------------|------------|---------------|----------------------|----------------------|----------|----------------------------------------------------------------------------------------------------------------------------------------------------------------|--------|
|        |                | antigen bound to MHC molecule on antigen presenting cell |            |               |                      |                      |          |                                                                                                                                                                |        |
| B<br>P | GO:00<br>45060 | negative thymic T cell selection                         | 7/926      | 10/17913      | 1.<br>01<br>E-<br>07 | 2.<br>07<br>E-<br>06 | 1.53E-06 | 1236/940/916/972/1794/5788/7535                                                                                                                                | 7      |
| B<br>P | GO:00<br>32731 | positive regulation of interleukin-1 beta production     | 13/92<br>6 | 42/17913      | 1.<br>09<br>E-<br>07 | 2.<br>23<br>E-<br>06 | 1.64E-06 | 9447/6363/6348/1958/3428/353514/4023/22861/114548/64127/5027/51311/7305                                                                                        | 1<br>3 |
| B<br>P | GO:00<br>01771 | immunological synapse formation                          | 8/926      | 14/17913      | 1.<br>13<br>E-<br>07 | 2.<br>29<br>E-<br>06 | 1.69E-06 | 6363/6366/1236/923/1794/84868/4478/5551                                                                                                                        | 8      |
| B<br>P | GO:00<br>32755 | positive regulation of interleukin-6 production          | 18/92<br>6 | 81/17913      | 1.<br>23<br>E-<br>07 | 2.<br>49<br>E-<br>06 | 1.84E-06 | 199/948/2069/2207/3553/3556/90865/3569/353514/10288/4023/64127/5027/7096/7097/10333/51311/7305                                                                 | 1<br>8 |
| B<br>P | GO:00<br>19722 | calcium-mediated signaling                               | 29/92<br>6 | 188/1791<br>3 | 1.<br>24<br>E-<br>07 | 2.<br>51<br>E-<br>06 | 1.85E-06 | 100/695/6364/6348/6351/933/916/3576/7852/1906/2358/2633/2903/2904/120892/79772/3084/5027/5031/5341/5788/1827/6401/6403/8600/50852/54209/7412/7535              | 2<br>9 |
| B<br>P | GO:00<br>10951 | negative regulation of endopeptidase activity            | 31/92<br>6 | 210/1791<br>3 | 1.<br>28<br>E-<br>07 | 2.<br>58<br>E-<br>06 | 1.90E-06 | 653145/274/718/720/721/135228/939/960/340267/1285/1378/1476/1800/3428/2537/27074/4018/4057/4318/4804/89932/5266/5329/5272/6622/11005/9806/50859/7035/7980/7422 | 3<br>1 |
| B<br>P | GO:00<br>45824 | negative regulation of innate immune                     | 15/92<br>6 | 57/17913      | 1.<br>29<br>E-<br>07 | 2.<br>58<br>E-<br>06 | 1.90E-06 | 10225/1378/84868/3134/3428/11213/10859/4321/197358/84166/5272/710/56833/7128/11326                                                                             | 1<br>5 |

|        |                |                                                          |            |           |                      |                      |          |                                                                                                                                       |        |
|--------|----------------|----------------------------------------------------------|------------|-----------|----------------------|----------------------|----------|---------------------------------------------------------------------------------------------------------------------------------------|--------|
|        |                | response                                                 |            |           |                      |                      |          |                                                                                                                                       |        |
| B<br>P | GO:00<br>02407 | dendritic cell<br>chemotaxis                             | 10/92<br>6 | 24/17913  | 1.<br>31<br>E-<br>07 | 2.<br>62<br>E-<br>06 | 1.93E-06 | 6363/6366/6352/729230/1236/3577/7852/1880/5294/56833                                                                                  | 1<br>0 |
| B<br>P | GO:00<br>35710 | CD4-positiv<br>e,<br>alpha-beta T<br>cell<br>activation  | 19/92<br>6 | 90/17913  | 1.<br>32<br>E-<br>07 | 2.<br>62<br>E-<br>06 | 1.93E-06 | 301/384/6363/29126/941/942/1880/3594/3569/3662/3718/4063/3071/114548/26279/5588/91543/54440/114836                                    | 1<br>9 |
| B<br>P | GO:00<br>46632 | alpha-beta T<br>cell<br>differentiatio<br>n              | 20/92<br>6 | 99/17913  | 1.<br>33<br>E-<br>07 | 2.<br>64<br>E-<br>06 | 1.95E-06 | 100/301/6363/941/942/8320/1880/3594/3569/3662/3718/4063/3071/114548/26279/639/91543/54440/114836/7535                                 | 2<br>0 |
| B<br>P | GO:00<br>50709 | negative<br>regulation of<br>protein<br>secretion        | 24/92<br>6 | 137/17913 | 1.<br>34<br>E-<br>07 | 2.<br>64<br>E-<br>06 | 1.95E-06 | 150/84830/301/348/384/55024/933/2213/2633/9734/3553/7850/90865/353514/10859/114548/26191/91543/80725/5552/10333/51311/7128/7447       | 2<br>4 |
| B<br>P | GO:00<br>02224 | toll-like<br>receptor<br>signaling<br>pathway            | 25/92<br>6 | 147/17913 | 1.<br>35<br>E-<br>07 | 2.<br>64<br>E-<br>06 | 1.95E-06 | 330/695/929/948/1514/2099/115352/84868/11213/3662/3684/3689/4057/23643/118788/26191/91543/6279/7096/81793/7097/10333/51284/51311/7128 | 2<br>5 |
| B<br>P | GO:00<br>31343 | positive<br>regulation of<br>cell killing                | 14/92<br>6 | 50/17913  | 1.<br>45<br>E-<br>07 | 2.<br>82<br>E-<br>06 | 2.08E-06 | 2208/3134/3594/3684/3902/5027/5551/5788/10125/4068/114836/26228/7305/7409                                                             | 1<br>4 |
| B<br>P | GO:00<br>32732 | positive<br>regulation of<br>interleukin-1<br>production | 14/92<br>6 | 50/17913  | 1.<br>45<br>E-<br>07 | 2.<br>82<br>E-<br>06 | 2.08E-06 | 9447/6363/6348/1958/84868/3428/353514/4023/22861/114548/64127/5027/51311/7305                                                         | 1<br>4 |
| B<br>P | GO:00<br>02828 | regulation of<br>type 2<br>immune<br>response            | 11/92<br>6 | 30/17913  | 1.<br>47<br>E-<br>07 | 2.<br>85<br>E-<br>06 | 2.10E-06 | 301/384/729230/972/942/3620/90865/3569/114548/64127/91543                                                                             | 1<br>1 |
| B<br>P | GO:00<br>10466 | negative<br>regulation of                                | 32/92<br>6 | 223/17913 | 1.<br>57             | 3.<br>04             | 2.25E-06 | 653145/274/718/720/721/135228/939/960/340267/1285/1378/1476/1800/3428/2537/27074/4018/4057/4318/4804/89932/                           | 3<br>2 |

|        |                |                                                     |            |           |                  |                  |          |                                                                                                                                                                                                                                                                       |        |
|--------|----------------|-----------------------------------------------------|------------|-----------|------------------|------------------|----------|-----------------------------------------------------------------------------------------------------------------------------------------------------------------------------------------------------------------------------------------------------------------------|--------|
|        |                | peptidase activity                                  |            |           | E-07             | E-06             |          | 51050/5266/5329/5272/6622/11005/9806/50859/7035/7980/7422                                                                                                                                                                                                             |        |
| B<br>P | GO:00<br>02708 | positive regulation of lymphocyte mediated immunity | 19/92<br>6 | 91/17913  | 1.<br>58<br>E-07 | 3.<br>05<br>E-06 | 2.25E-06 | 695/718/940/2207/2208/3134/3594/3553/3569/3902/114548/5027/5788/10125/91543/54440/4068/114836/7409                                                                                                                                                                    | 1<br>9 |
| B<br>P | GO:00<br>22604 | regulation of cell morphogenesis                    | 49/92<br>6 | 430/17913 | 1.<br>75<br>E-07 | 3.<br>37<br>E-06 | 2.49E-06 | 301/348/55843/6357/6347/6348/960/11151/1436/7852/1630/5168/23136/2048/752/114793/23105/2633/23426/3055/3383/3689/3792/3897/23566/4038/120892/4478/4804/4897/9423/10439/5063/55607/5800/5649/5979/6091/6281/10371/57619/375611/6696/80725/51760/23043/347733/7422/9839 | 4<br>9 |
| B<br>P | GO:00<br>70228 | regulation of lymphocyte apoptotic process          | 14/92<br>6 | 51/17913  | 1.<br>90<br>E-07 | 3.<br>62<br>E-06 | 2.67E-06 | 100/384/695/6352/939/29126/917/972/3620/3575/3718/5027/5588/1831                                                                                                                                                                                                      | 1<br>4 |
| B<br>P | GO:01<br>50077 | regulation of neuroinflammatory response            | 14/92<br>6 | 51/17913  | 1.<br>90<br>E-07 | 3.<br>62<br>E-06 | 2.67E-06 | 712/728/6348/3553/90865/3569/3684/3689/120892/4318/26471/5788/26228/54209                                                                                                                                                                                             | 1<br>4 |
| B<br>P | GO:00<br>50706 | regulation of interleukin-1 beta secretion          | 13/92<br>6 | 44/17913  | 2.<br>01<br>E-07 | 3.<br>81<br>E-06 | 2.81E-06 | 9447/384/6363/6348/1236/353514/4023/22861/114548/64127/5027/51311/7128                                                                                                                                                                                                | 1<br>3 |
| B<br>P | GO:00<br>71622 | regulation of granulocyte chemotaxis                | 13/92<br>6 | 44/17913  | 2.<br>01<br>E-07 | 3.<br>81<br>E-06 | 2.81E-06 | 719/728/6363/6366/6352/1236/972/3576/1906/4354/3071/5880/9750                                                                                                                                                                                                         | 1<br>3 |
| B<br>P | GO:00<br>31348 | negative regulation of defense response             | 33/92<br>6 | 237/17913 | 2.<br>07<br>E-07 | 3.<br>91<br>E-06 | 2.88E-06 | 54/100/113/348/384/10225/1378/2213/10875/2358/84868/3134/3428/7850/3559/11213/10859/4210/4321/197358/84166/114548/4907/5788/5272/710/89790/140885/56833/9021/11005/7128/11326                                                                                         | 3<br>3 |
| B<br>P | GO:00<br>10818 | T cell chemotaxis                                   | 10/92<br>6 | 25/17913  | 2.<br>09<br>E-07 | 3.<br>92<br>E-06 | 2.89E-06 | 6366/6348/6352/729230/3627/6373/10563/1880/5293/5294                                                                                                                                                                                                                  | 1<br>0 |

|        |                |                                                             |            |               |                      |                      |          |                                                                                                                                                                                                                                                                             |        |
|--------|----------------|-------------------------------------------------------------|------------|---------------|----------------------|----------------------|----------|-----------------------------------------------------------------------------------------------------------------------------------------------------------------------------------------------------------------------------------------------------------------------------|--------|
| B<br>P | GO:00<br>50704 | regulation of<br>interleukin-1<br>secretion                 | 14/92<br>6 | 52/17913      | 2.<br>48<br>E-<br>07 | 4.<br>63<br>E-<br>06 | 3.42E-06 | 9447/384/6363/6348/1236/7850/353514/4023/22861/114548<br>/64127/5027/51311/7128                                                                                                                                                                                             | 1<br>4 |
| B<br>P | GO:00<br>43277 | apoptotic<br>cell<br>clearance                              | 12/92<br>6 | 38/17913      | 2.<br>64<br>E-<br>07 | 4.<br>91<br>E-<br>06 | 3.63E-06 | 575/717/718/720/721/6347/948/2219/8685/7052/54209/7305                                                                                                                                                                                                                      | 1<br>2 |
| B<br>P | GO:00<br>32490 | detection of<br>molecule of<br>bacterial<br>origin          | 7/926      | 11/17913      | 2.<br>65<br>E-<br>07 | 4.<br>92<br>E-<br>06 | 3.63E-06 | 721/23643/64127/7096/7097/10333/54209                                                                                                                                                                                                                                       | 7      |
| B<br>P | GO:20<br>00401 | regulation of<br>lymphocyte<br>migration                    | 15/92<br>6 | 60/17913      | 2.<br>68<br>E-<br>07 | 4.<br>96<br>E-<br>06 | 3.66E-06 | 84830/199/6347/6364/6366/6348/6351/6352/729230/3627/1<br>0563/3676/4478/11240/9750                                                                                                                                                                                          | 1<br>5 |
| B<br>P | GO:00<br>61756 | leukocyte<br>adhesion to<br>vascular<br>endothelial<br>cell | 13/92<br>6 | 45/17913      | 2.<br>70<br>E-<br>07 | 4.<br>98<br>E-<br>06 | 3.67E-06 | 119/6366/729230/2650/3383/3676/3689/50512/6401/6402/6<br>403/6404/7412                                                                                                                                                                                                      | 1<br>3 |
| B<br>P | GO:00<br>61564 | axon<br>developmen<br>t                                     | 49/92<br>6 | 438/1791<br>3 | 3.<br>07<br>E-<br>07 | 5.<br>63<br>E-<br>06 | 4.16E-06 | 107/575/348/655/10752/23242/1436/7852/1630/9201/1749/1<br>959/2048/2297/23105/2674/2817/3676/3725/3792/3897/235<br>66/4038/5818/4744/4781/4804/4929/8013/4897/9423/10439/<br>5063/5293/5588/5800/5649/5979/56963/6091/10371/57556/<br>6696/6812/347733/10381/7345/7422/9839 | 4<br>9 |
| B<br>P | GO:00<br>51896 | regulation of<br>protein<br>kinase B<br>signaling           | 33/92<br>6 | 241/1791<br>3 | 3.<br>08<br>E-<br>07 | 5.<br>63<br>E-<br>06 | 4.16E-06 | 374/55024/6363/6366/6348/1236/930/940/941/942/1116/206<br>9/2099/2152/2261/2651/1839/3059/29851/3481/3932/3084/1<br>45957/118788/5293/5294/23533/5880/5979/143686/8600/50<br>852/7409                                                                                       | 3<br>3 |
| B<br>P | GO:00<br>43368 | positive T<br>cell<br>selection                             | 11/92<br>6 | 32/17913      | 3.<br>15<br>E-<br>07 | 5.<br>74<br>E-<br>06 | 4.23E-06 | 915/972/1794/3594/3569/3662/4063/5788/114836/387357/7<br>535                                                                                                                                                                                                                | 1<br>1 |
| B<br>P | GO:00<br>32602 | chemokine<br>production                                     | 18/92<br>6 | 86/17913      | 3.<br>22             | 5.<br>84             | 4.31E-06 | 199/384/972/1436/1958/84868/3162/3553/9173/90865/3569/<br>4023/4210/6279/140885/7097/51284/54209                                                                                                                                                                            | 1<br>8 |

|        |                |                                                                      |            |               |                      |                      |          |                                                                                                                                                                |        |
|--------|----------------|----------------------------------------------------------------------|------------|---------------|----------------------|----------------------|----------|----------------------------------------------------------------------------------------------------------------------------------------------------------------|--------|
|        |                |                                                                      |            |               | E-07                 | E-06                 |          |                                                                                                                                                                |        |
| B<br>P | GO:00<br>02507 | tolerance<br>induction                                               | 10/92<br>6 | 26/17913      | 3.<br>23<br>E-<br>07 | 5.<br>85<br>E-<br>06 | 4.32E-06 | 1233/29126/916/84868/29851/3620/3559/11213/10288/7128                                                                                                          | 1<br>0 |
| B<br>P | GO:00<br>46635 | positive<br>regulation of<br>alpha-beta T<br>cell<br>activation      | 15/92<br>6 | 61/17913      | 3.<br>39<br>E-<br>07 | 6.<br>11<br>E-<br>06 | 4.51E-06 | 100/301/6363/729230/940/916/941/942/3594/3071/114548/5588/5788/54440/7535                                                                                      | 1<br>5 |
| B<br>P | GO:00<br>02830 | positive<br>regulation of<br>type 2<br>immune<br>response            | 8/926      | 16/17913      | 4.<br>39<br>E-<br>07 | 7.<br>87<br>E-<br>06 | 5.81E-06 | 972/942/3620/90865/3569/114548/64127/91543                                                                                                                     | 8      |
| B<br>P | GO:00<br>32695 | negative<br>regulation of<br>interleukin-1<br>2 production           | 8/926      | 16/17913      | 4.<br>39<br>E-<br>07 | 7.<br>87<br>E-<br>06 | 5.81E-06 | 54/11213/3718/353514/10859/4210/6504/51311                                                                                                                     | 8      |
| B<br>P | GO:00<br>32642 | regulation of<br>chemokine<br>production                             | 17/92<br>6 | 79/17913      | 4.<br>48<br>E-<br>07 | 8.<br>00<br>E-<br>06 | 5.91E-06 | 199/384/972/1436/1958/84868/3162/3553/9173/90865/3569/4023/4210/140885/7097/51284/54209                                                                        | 1<br>7 |
| B<br>P | GO:00<br>43032 | positive<br>regulation of<br>macrophage<br>activation                | 11/92<br>6 | 33/17913      | 4.<br>50<br>E-<br>07 | 8.<br>00<br>E-<br>06 | 5.91E-06 | 712/6348/84868/9173/90865/3684/3689/120892/26228/10333/54209                                                                                                   | 1<br>1 |
| B<br>P | GO:20<br>00116 | regulation of<br>cysteine-ty<br>p<br>e<br>endopeptida<br>se activity | 31/92<br>6 | 222/1791<br>3 | 4.<br>52<br>E-<br>07 | 8.<br>02<br>E-<br>06 | 5.92E-06 | 9447/330/939/960/1285/26999/1800/112399/2152/355/2903/2904/3428/2537/27074/3932/4057/4210/4318/4804/22861/114548/64065/5329/5698/6091/6279/5272/6622/8626/7422 | 3<br>1 |
| B<br>P | GO:00<br>02456 | T cell<br>mediated<br>immunity                                       | 18/92<br>6 | 88/17913      | 4.<br>62<br>E-<br>07 | 8.<br>16<br>E-<br>06 | 6.03E-06 | 729230/2213/3134/3383/3594/3553/3569/3575/10859/64005/114548/5027/5551/5788/91543/54440/6556/7454                                                              | 1<br>8 |

|        |                |                                                                                    |            |               |                      |                      |          |                                                                                                                                                                                                                                         |        |
|--------|----------------|------------------------------------------------------------------------------------|------------|---------------|----------------------|----------------------|----------|-----------------------------------------------------------------------------------------------------------------------------------------------------------------------------------------------------------------------------------------|--------|
| B<br>P | GO:00<br>32673 | regulation of<br>interleukin-4<br>production                                       | 10/92<br>6 | 27/17913      | 4.<br>90<br>E-<br>07 | 8.<br>59<br>E-<br>06 | 6.34E-06 | 940/916/942/2207/84868/90865/3662/114548/5588/54440                                                                                                                                                                                     | 1<br>0 |
| B<br>P | GO:00<br>36336 | dendritic cell<br>migration                                                        | 10/92<br>6 | 27/17913      | 4.<br>90<br>E-<br>07 | 8.<br>59<br>E-<br>06 | 6.34E-06 | 6363/6366/6352/729230/1236/3577/7852/1880/5294/56833                                                                                                                                                                                    | 1<br>0 |
| B<br>P | GO:00<br>01912 | positive<br>regulation of<br>leukocyte<br>mediated<br>cytotoxicity                 | 12/92<br>6 | 40/17913      | 4.<br>94<br>E-<br>07 | 8.<br>64<br>E-<br>06 | 6.38E-06 | 3134/3594/3684/3902/5027/5788/10125/4068/114836/26228<br>/7305/7409                                                                                                                                                                     | 1<br>2 |
| B<br>P | GO:00<br>70664 | negative<br>regulation of<br>leukocyte<br>proliferation                            | 16/92<br>6 | 71/17913      | 5.<br>01<br>E-<br>07 | 8.<br>73<br>E-<br>06 | 6.44E-06 | 384/695/29126/1493/2213/10457/84868/3620/3559/10859/1<br>0288/4332/80380/7128/7305/11326                                                                                                                                                | 1<br>6 |
| B<br>P | GO:00<br>32102 | negative<br>regulation of<br>response to<br>external<br>stimulus                   | 41/92<br>6 | 343/1791<br>3 | 5.<br>09<br>E-<br>07 | 8.<br>84<br>E-<br>06 | 6.52E-06 | 54/100/113/84830/199/348/384/6347/135228/10563/1843/19<br>06/83481/2213/10875/2358/2811/84868/7850/3559/4057/42<br>10/197358/114548/4907/11240/5329/5788/5800/56963/6091<br>/710/89790/140885/56833/9021/11005/6696/26228/7035/71<br>28 | 4<br>1 |
| B<br>P | GO:00<br>02573 | myeloid<br>leukocyte<br>differentiatio<br>n                                        | 29/92<br>6 | 201/1791<br>3 | 5.<br>30<br>E-<br>07 | 9.<br>17<br>E-<br>06 | 6.77E-06 | 714/6363/6348/1236/135228/972/1021/1436/2124/2207/188<br>0/3059/3428/133396/3662/3725/10859/11006/4057/4318/52<br>93/8544/6688/7097/8600/54209/7305/10537/7422                                                                          | 2<br>9 |
| B<br>P | GO:00<br>02532 | production<br>of molecular<br>mediator<br>involved in<br>inflammator<br>y response | 16/92<br>6 | 72/17913      | 6.<br>14<br>E-<br>07 | 1.<br>06<br>E-<br>05 | 7.81E-06 | 113/695/948/923/10225/2207/115362/3620/7850/4210/1973<br>58/64127/5187/140885/56833/10333                                                                                                                                               | 1<br>6 |
| B<br>P | GO:00<br>02704 | negative<br>regulation of<br>leukocyte                                             | 13/92<br>6 | 48/17913      | 6.<br>17<br>E-       | 1.<br>06<br>E-       | 7.83E-06 | 729230/8832/10225/1378/2213/84868/3134/3162/3575/3718<br>/10859/5788/5272                                                                                                                                                               | 1<br>3 |



|        |                |                                                                            |            |               |                      |                      |          |                                                                                                                                                                                                            |        |
|--------|----------------|----------------------------------------------------------------------------|------------|---------------|----------------------|----------------------|----------|------------------------------------------------------------------------------------------------------------------------------------------------------------------------------------------------------------|--------|
|        |                | mediated immunity                                                          |            |               | 07                   | 05                   |          |                                                                                                                                                                                                            |        |
| B<br>P | GO:00<br>10038 | response to metal ion                                                      | 40/92<br>6 | 335/1791<br>3 | 7.<br>20<br>E-<br>07 | 1.<br>23<br>E-<br>05 | 9.10E-06 | 107/113/84059/241/366/712/929/999/1396/1536/1800/1843/1906/2729/3162/3383/3725/120892/4129/4318/4489/4493/4499/4501/4502/653361/10397/5027/10891/10235/6279/6331/375611/6622/7020/7031/7054/4982/7273/7412 | 4<br>0 |
| B<br>P | GO:00<br>70229 | negative regulation of lymphocyte apoptotic process                        | 10/92<br>6 | 28/17913      | 7.<br>27<br>E-<br>07 | 1.<br>24<br>E-<br>05 | 9.15E-06 | 100/384/6352/939/972/3620/3575/3718/5588/1831                                                                                                                                                              | 1<br>0 |
| B<br>P | GO:00<br>43901 | negative regulation of multi-organism process                              | 27/92<br>6 | 182/1791<br>3 | 7.<br>43<br>E-<br>07 | 1.<br>26<br>E-<br>05 | 9.33E-06 | 100/384/6348/6351/6352/948/2219/10875/84868/8091/3428/3434/8519/10581/10410/3559/3394/3725/4057/4599/8638/5806/91543/11005/7128/11074/7538                                                                 | 2<br>7 |
| B<br>P | GO:00<br>19058 | viral life cycle                                                           | 39/92<br>6 | 324/1791<br>3 | 8.<br>07<br>E-<br>07 | 1.<br>37<br>E-<br>05 | 1.01E-05 | 290/348/6347/6352/30835/940/972/941/942/10332/1378/1380/1525/3576/7852/10663/1803/2219/2838/8091/3304/3383/3428/3429/3434/8519/10581/10410/27074/4057/4360/4599/5818/8638/5806/91543/6404/6504/11074       | 3<br>9 |
| B<br>P | GO:00<br>32945 | negative regulation of mononuclear cell proliferation                      | 15/92<br>6 | 65/17913      | 8.<br>20<br>E-<br>07 | 1.<br>38<br>E-<br>05 | 1.02E-05 | 384/695/29126/1493/2213/10457/84868/3620/3559/10859/10288/4332/80380/7305/11326                                                                                                                            | 1<br>5 |
| B<br>P | GO:00<br>50672 | negative regulation of lymphocyte proliferation                            | 15/92<br>6 | 65/17913      | 8.<br>20<br>E-<br>07 | 1.<br>38<br>E-<br>05 | 1.02E-05 | 384/695/29126/1493/2213/10457/84868/3620/3559/10859/10288/4332/80380/7305/11326                                                                                                                            | 1<br>5 |
| B<br>P | GO:00<br>02701 | negative regulation of production of molecular mediator of immune response | 11/92<br>6 | 35/17913      | 8.<br>82<br>E-<br>07 | 1.<br>47<br>E-<br>05 | 1.09E-05 | 933/10225/2213/115352/3134/3162/90865/11213/3718/10859/11005                                                                                                                                               | 1<br>1 |
| B      | GO:00          | heterophilic                                                               | 11/92      | 35/17913      | 8.                   | 1.                   | 1.09E-05 | 57863/30835/923/1525/3383/3683/120425/5818/6401/6403/                                                                                                                                                      | 1      |

|        |                |                                                                |            |           |                      |                      |          |                                                                                                                                                                                                                                                               |        |
|--------|----------------|----------------------------------------------------------------|------------|-----------|----------------------|----------------------|----------|---------------------------------------------------------------------------------------------------------------------------------------------------------------------------------------------------------------------------------------------------------------|--------|
| P      | 07157          | cell-cell adhesion via plasma membrane cell adhesion molecules | 6          |           | 82<br>E-<br>07       | 47<br>E-<br>05       |          | 7412                                                                                                                                                                                                                                                          | 1      |
| B<br>P | GO:00<br>42092 | type 2 immune response                                         | 11/92<br>6 | 35/17913  | 8.<br>82<br>E-<br>07 | 1.<br>47<br>E-<br>05 | 1.09E-05 | 301/384/729230/972/942/3620/90865/3569/114548/64127/91543                                                                                                                                                                                                     | 1<br>1 |
| B<br>P | GO:00<br>70838 | divalent metal ion transport                                   | 49/92<br>6 | 454/17913 | 8.<br>90<br>E-<br>07 | 1.<br>48<br>E-<br>05 | 1.09E-05 | 150/309/489/9914/274/777/6363/6347/6366/6348/6351/6352/1236/930/8832/57214/11151/3627/6373/4283/7852/115352/2903/2904/3383/3603/3932/353514/10859/10288/23566/931/9722/5027/5031/5142/5294/5579/5788/22821/6236/6556/84102/6622/6769/342667/80036/140803/7991 | 4<br>9 |
| B<br>P | GO:00<br>43367 | CD4-positive, alpha-beta T cell differentiation                | 16/92<br>6 | 74/17913  | 9.<br>10<br>E-<br>07 | 1.<br>51<br>E-<br>05 | 1.11E-05 | 301/6363/941/942/1880/3594/3569/3662/3718/4063/3071/114548/26279/91543/54440/114836                                                                                                                                                                           | 1<br>6 |
| B<br>P | GO:00<br>06816 | calcium ion transport                                          | 46/92<br>6 | 415/17913 | 9.<br>17<br>E-<br>07 | 1.<br>51<br>E-<br>05 | 1.12E-05 | 150/309/489/9914/274/777/6363/6347/6366/6348/6351/6352/1236/930/8832/57214/11151/3627/6373/4283/7852/115352/2903/2904/3383/3603/3932/353514/10859/10288/23566/931/9722/5027/5031/5142/5294/5579/5788/22821/6236/6622/6769/342667/80036/140803                 | 4<br>6 |
| B<br>P | GO:19<br>03038 | negative regulation of leukocyte cell-cell adhesion            | 21/92<br>6 | 121/17913 | 9.<br>47<br>E-<br>07 | 1.<br>56<br>E-<br>05 | 1.15E-05 | 84830/301/384/6366/29126/972/1493/2213/10457/84868/3620/3559/3718/3902/54900/10859/10288/80380/26191/9750/11326                                                                                                                                               | 2<br>1 |
| B<br>P | GO:00<br>43270 | positive regulation of ion transport                           | 34/92<br>6 | 266/17913 | 1.<br>04<br>E-<br>06 | 1.<br>71<br>E-<br>05 | 1.26E-05 | 5243/5244/150/348/9914/10396/6347/6348/6351/6352/729230/930/57214/3627/6373/4283/1906/2048/3359/3553/8564/353514/23566/9722/5027/5031/5649/6331/6622/6769/342667/6812/8600/54209                                                                              | 3<br>4 |

|        |                |                                                                                              |            |           |                      |                      |          |                                                                                                                                                                                                                                                               |        |
|--------|----------------|----------------------------------------------------------------------------------------------|------------|-----------|----------------------|----------------------|----------|---------------------------------------------------------------------------------------------------------------------------------------------------------------------------------------------------------------------------------------------------------------|--------|
| B<br>P | GO:00<br>50718 | positive<br>regulation of<br>interleukin-1<br>beta<br>secretion                              | 10/92<br>6 | 29/17913  | 1.<br>06<br>E-<br>06 | 1.<br>73<br>E-<br>05 | 1.28E-05 | 9447/6363/6348/353514/4023/22861/114548/64127/5027/51311                                                                                                                                                                                                      | 1<br>0 |
| B<br>P | GO:00<br>50857 | positive<br>regulation of<br>antigen<br>receptor-me<br>diated<br>signaling<br>pathway        | 9/926      | 23/17913  | 1.<br>07<br>E-<br>06 | 1.<br>75<br>E-<br>05 | 1.29E-05 | 100/1236/3932/150372/5579/5788/26228/9840/50852                                                                                                                                                                                                               | 9      |
| B<br>P | GO:00<br>02702 | positive<br>regulation of<br>production<br>of molecular<br>mediator of<br>immune<br>response | 18/92<br>6 | 93/17913  | 1.<br>09<br>E-<br>06 | 1.<br>77<br>E-<br>05 | 1.31E-05 | 940/948/972/2207/51704/3134/3553/90865/3569/5650/10859/51237/114548/64127/8013/5788/91543/54440                                                                                                                                                               | 1<br>8 |
| B<br>P | GO:00<br>72511 | divalent<br>inorganic<br>cation<br>transport                                                 | 49/92<br>6 | 458/17913 | 1.<br>15<br>E-<br>06 | 1.<br>86<br>E-<br>05 | 1.37E-05 | 150/309/489/9914/274/777/6363/6347/6366/6348/6351/6352/1236/930/8832/57214/11151/3627/6373/4283/7852/115352/2903/2904/3383/3603/3932/353514/10859/10288/23566/931/9722/5027/5031/5142/5294/5579/5788/22821/6236/6556/84102/6622/6769/342667/80036/140803/7991 | 4<br>9 |
| B<br>P | GO:00<br>97028 | dendritic cell<br>differentiation                                                            | 12/92<br>6 | 43/17913  | 1.<br>18<br>E-<br>06 | 1.<br>90<br>E-<br>05 | 1.40E-05 | 6363/1236/2213/2322/3662/10859/10288/6688/55365/28959/54209/10537                                                                                                                                                                                             | 1<br>2 |
| B<br>P | GO:00<br>02755 | MyD88-dep<br>endent<br>toll-like<br>receptor<br>signaling<br>pathway                         | 11/92<br>6 | 36/17913  | 1.<br>21<br>E-<br>06 | 1.<br>95<br>E-<br>05 | 1.44E-05 | 695/929/948/11213/23643/7096/81793/7097/10333/51284/51311                                                                                                                                                                                                     | 1<br>1 |
| B<br>P | GO:00<br>70227 | lymphocyte<br>apoptotic<br>process                                                           | 15/92<br>6 | 67/17913  | 1.<br>24<br>E-<br>06 | 1.<br>99<br>E-<br>05 | 1.47E-05 | 100/384/695/6352/939/29126/917/972/3620/3559/3575/3718/5027/5588/1831                                                                                                                                                                                         | 1<br>5 |

|        |                |                                                                                          |            |               |                      |                      |          |                                                                                                                                                                                                                                                   |        |
|--------|----------------|------------------------------------------------------------------------------------------|------------|---------------|----------------------|----------------------|----------|---------------------------------------------------------------------------------------------------------------------------------------------------------------------------------------------------------------------------------------------------|--------|
| B<br>P | GO:00<br>50808 | synapse<br>organization                                                                  | 44/92<br>6 | 394/1791<br>3 | 1.<br>29<br>E-<br>06 | 2.<br>06<br>E-<br>05 | 1.52E-05 | 119/575/348/712/713/714/718/728/1006/1134/22866/55619/<br>2048/2213/2904/57549/3587/3556/9118/3675/3684/3897/10<br>288/4038/120892/266727/10397/5818/4744/9722/4897/3084<br>/9423/5063/55607/5800/5649/54549/22941/84189/6622/980<br>6/80725/7097 | 4<br>4 |
| B<br>P | GO:00<br>42742 | defense<br>response to<br>bacterium                                                      | 32/92<br>6 | 245/1791<br>3 | 1.<br>34<br>E-<br>06 | 2.<br>13<br>E-<br>05 | 1.57E-05 | 54/575/306/384/728/6364/948/10563/2358/10578/84868/356<br>9/3394/3512/5650/4057/4069/219972/22861/114548/64127/<br>5027/51316/6279/6403/56833/6556/11005/23166/55576/709<br>7/10333                                                               | 3<br>2 |
| B<br>P | GO:00<br>50868 | negative<br>regulation of<br>T cell<br>activation                                        | 19/92<br>6 | 104/1791<br>3 | 1.<br>39<br>E-<br>06 | 2.<br>20<br>E-<br>05 | 1.63E-05 | 301/384/29126/972/1493/2213/10457/84868/3620/3559/371<br>8/3902/54900/10859/10288/80380/26191/9750/11326                                                                                                                                          | 1<br>9 |
| B<br>P | GO:00<br>51224 | negative<br>regulation of<br>protein<br>transport                                        | 27/92<br>6 | 189/1791<br>3 | 1.<br>58<br>E-<br>06 | 2.<br>50<br>E-<br>05 | 1.84E-05 | 150/84830/301/348/384/55024/933/948/2213/55612/2633/97<br>34/3553/7850/90865/353514/10859/120892/114548/26191/9<br>1543/80725/5552/10333/51311/7128/7447                                                                                          | 2<br>7 |
| B<br>P | GO:00<br>02260 | lymphocyte<br>homeostasi<br>s                                                            | 14/92<br>6 | 60/17913      | 1.<br>65<br>E-<br>06 | 2.<br>61<br>E-<br>05 | 1.92E-05 | 100/972/11151/55619/139818/84636/3559/3718/3071/5027/<br>124976/7128/10673/1831                                                                                                                                                                   | 1<br>4 |
| B<br>P | GO:00<br>02720 | positive<br>regulation of<br>cytokine<br>production<br>involved in<br>immune<br>response | 13/92<br>6 | 52/17913      | 1.<br>68<br>E-<br>06 | 2.<br>63<br>E-<br>05 | 1.94E-05 | 948/972/2207/51704/3134/3553/3569/10859/114548/64127/<br>8013/91543/54440                                                                                                                                                                         | 1<br>3 |
| B<br>P | GO:00<br>02886 | regulation of<br>myeloid<br>leukocyte<br>mediated<br>immunity                            | 13/92<br>6 | 52/17913      | 1.<br>68<br>E-<br>06 | 2.<br>63<br>E-<br>05 | 1.94E-05 | 30817/695/718/729230/8832/1776/2207/2213/3162/3684/36<br>89/5880/6812                                                                                                                                                                             | 1<br>3 |
| B<br>P | GO:00<br>42590 | antigen<br>processing                                                                    | 16/92<br>6 | 78/17913      | 1.<br>92             | 3.<br>00             | 2.21E-05 | 948/1536/2209/3105/3106/3107/3134/3136/10437/653361/4<br>688/4689/5696/5698/6890/6891                                                                                                                                                             | 1<br>6 |

|        |                |                                                               |            |               |                      |                      |          |                                                                                                                                                                                                                        |        |
|--------|----------------|---------------------------------------------------------------|------------|---------------|----------------------|----------------------|----------|------------------------------------------------------------------------------------------------------------------------------------------------------------------------------------------------------------------------|--------|
|        |                | and presentation of exogenous peptide antigen via MHC class I |            |               | E-06                 | E-05                 |          |                                                                                                                                                                                                                        |        |
| B<br>P | GO:00<br>02448 | mast cell mediated immunity                                   | 12/92<br>6 | 45/17913      | 2.<br>00<br>E-<br>06 | 3.<br>11<br>E-<br>05 | 2.30E-05 | 30817/695/8832/2207/3162/8013/5293/5294/5880/10125/5272/6812                                                                                                                                                           | 1<br>2 |
| B<br>P | GO:00<br>33628 | regulation of cell adhesion mediated by integrin              | 12/92<br>6 | 45/17913      | 2.<br>00<br>E-<br>06 | 3.<br>11<br>E-<br>05 | 2.30E-05 | 100/6366/6352/916/10563/1803/55612/83706/3071/5140/5294/5979                                                                                                                                                           | 1<br>2 |
| B<br>P | GO:00<br>02709 | regulation of T cell mediated immunity                        | 14/92<br>6 | 61/17913      | 2.<br>04<br>E-<br>06 | 3.<br>15<br>E-<br>05 | 2.33E-05 | 729230/2213/3134/3594/3553/3569/3575/10859/114548/5027/5788/91543/54440/7454                                                                                                                                           | 1<br>4 |
| B<br>P | GO:00<br>33627 | cell adhesion mediated by integrin                            | 14/92<br>6 | 61/17913      | 2.<br>04<br>E-<br>06 | 3.<br>15<br>E-<br>05 | 2.33E-05 | 100/6366/6352/916/10563/1803/55612/83706/3383/3676/3071/5140/5294/5979                                                                                                                                                 | 1<br>4 |
| B<br>P | GO:19<br>03978 | regulation of microglial cell activation                      | 10/92<br>6 | 31/17913      | 2.<br>13<br>E-<br>06 | 3.<br>28<br>E-<br>05 | 2.42E-05 | 712/728/6348/3569/3684/3689/120892/5788/26228/54209                                                                                                                                                                    | 1<br>0 |
| B<br>P | GO:00<br>45061 | thymic T cell selection                                       | 8/926      | 19/17913      | 2.<br>25<br>E-<br>06 | 3.<br>44<br>E-<br>05 | 2.54E-05 | 1236/940/915/916/972/1794/5788/7535                                                                                                                                                                                    | 8      |
| B<br>P | GO:00<br>90066 | regulation of anatomical structure size                       | 47/92<br>6 | 442/1791<br>3 | 2.<br>25<br>E-<br>06 | 3.<br>44<br>E-<br>05 | 2.54E-05 | 119/150/10000/8862/348/274/146206/6366/1236/952/11151/1630/1906/342184/23105/2729/3055/3059/3162/3274/3383/3575/10788/3792/3897/23566/120892/4478/3071/4868/4897/9423/10439/5027/5029/5063/5341/55607/5979/5997/10371/ | 4<br>7 |

|        |                |                                                                       |            |               |                      |                      |          |                                                                                                                                                                                                     |        |
|--------|----------------|-----------------------------------------------------------------------|------------|---------------|----------------------|----------------------|----------|-----------------------------------------------------------------------------------------------------------------------------------------------------------------------------------------------------|--------|
|        |                |                                                                       |            |               |                      |                      |          | 375611/6648/6696/7409/7422/7454                                                                                                                                                                     |        |
| B<br>P | GO:19<br>04950 | negative<br>regulation of<br>establishment of protein<br>localization | 27/92<br>6 | 193/1791<br>3 | 2.<br>38<br>E-<br>06 | 3.<br>63<br>E-<br>05 | 2.68E-05 | 150/84830/301/348/384/55024/933/948/2213/55612/2633/9734/3553/7850/90865/353514/10859/120892/114548/26191/91543/80725/5552/10333/51311/7128/7447                                                    | 2<br>7 |
| B<br>P | GO:00<br>02335 | mature B<br>cell<br>differentiation                                   | 9/926      | 25/17913      | 2.<br>45<br>E-<br>06 | 3.<br>71<br>E-<br>05 | 2.74E-05 | 100/930/55619/139818/2213/1880/9452/23228/56833                                                                                                                                                     | 9      |
| B<br>P | GO:19<br>01623 | regulation of<br>lymphocyte<br>chemotaxis                             | 9/926      | 25/17913      | 2.<br>45<br>E-<br>06 | 3.<br>71<br>E-<br>05 | 2.74E-05 | 6347/6366/6348/6351/6352/729230/3627/10563/11240                                                                                                                                                    | 9      |
| B<br>P | GO:00<br>16064 | immunoglobulin<br>mediated<br>immune<br>response                      | 25/92<br>6 | 171/1791<br>3 | 2.<br>49<br>E-<br>06 | 3.<br>76<br>E-<br>05 | 2.78E-05 | 695/712/713/714/717/718/720/721/730/930/939/940/972/3426/1378/1380/2207/2208/2213/10875/3119/5788/710/55061/51311                                                                                   | 2<br>5 |
| B<br>P | GO:00<br>34121 | regulation of<br>toll-like<br>receptor<br>signaling<br>pathway        | 15/92<br>6 | 71/17913      | 2.<br>71<br>E-<br>06 | 4.<br>08<br>E-<br>05 | 3.01E-05 | 330/929/948/2099/115352/11213/3662/4057/23643/26191/91543/7096/7097/10333/7128                                                                                                                      | 1<br>5 |
| B<br>P | GO:00<br>70555 | response to<br>interleukin-1                                          | 26/92<br>6 | 183/1791<br>3 | 2.<br>72<br>E-<br>06 | 4.<br>09<br>E-<br>05 | 3.02E-05 | 27063/6347/6348/6352/952/1116/3576/1906/1958/2633/2729/3383/3553/7850/3556/3569/11213/8564/64127/5696/5698/6401/140885/6622/6662/7035                                                               | 2<br>6 |
| B<br>P | GO:00<br>32535 | regulation of<br>cellular<br>component<br>size                        | 37/92<br>6 | 315/1791<br>3 | 2.<br>76<br>E-<br>06 | 4.<br>14<br>E-<br>05 | 3.05E-05 | 119/10000/348/274/146206/6366/1236/11151/1630/1906/342184/23105/3055/3059/3383/3575/10788/3792/3897/23566/4478/3071/4868/4897/9423/10439/5027/5063/5341/55607/5979/10371/375611/6696/7409/7422/7454 | 3<br>7 |
| B<br>P | GO:00<br>08037 | cell<br>recognition                                                   | 21/92<br>6 | 129/1791<br>3 | 2.<br>77<br>E-<br>06 | 4.<br>14<br>E-<br>05 | 3.06E-05 | 575/6363/6366/1236/30835/948/921/923/10332/64581/55790/7852/1794/2048/2219/84868/4478/4897/5551/6091/10371                                                                                          | 2<br>1 |

|        |                |                                                    |            |               |                      |                      |          |                                                                                                                           |        |
|--------|----------------|----------------------------------------------------|------------|---------------|----------------------|----------------------|----------|---------------------------------------------------------------------------------------------------------------------------|--------|
| B<br>P | GO:00<br>48525 | negative<br>regulation of<br>viral process         | 18/92<br>6 | 99/17913      | 2.<br>81<br>E-<br>06 | 4.<br>19<br>E-<br>05 | 3.09E-05 | 6348/6351/6352/2219/8091/3428/3434/8519/10581/10410/3<br>725/4057/4599/8638/5806/91543/11074/7538                         | 1<br>8 |
| B<br>P | GO:00<br>70232 | regulation of<br>T cell<br>apoptotic<br>process    | 10/92<br>6 | 32/17913      | 2.<br>96<br>E-<br>06 | 4.<br>39<br>E-<br>05 | 3.24E-05 | 100/384/6352/939/29126/3620/3575/3718/5588/1831                                                                           | 1<br>0 |
| B<br>P | GO:00<br>72376 | protein<br>activation<br>cascade                   | 23/92<br>6 | 151/1791<br>3 | 3.<br>06<br>E-<br>06 | 4.<br>53<br>E-<br>05 | 3.34E-05 | 712/713/714/717/718/719/720/721/728/730/930/629/3426/13<br>78/1380/2152/2219/2811/3553/710/55061/7035/11326               | 2<br>3 |
| B<br>P | GO:00<br>02228 | natural killer<br>cell<br>mediated<br>immunity     | 14/92<br>6 | 63/17913      | 3.<br>08<br>E-<br>06 | 4.<br>53<br>E-<br>05 | 3.34E-05 | 10225/11151/3002/84868/3134/3822/3902/10859/10125/527<br>2/4068/114836/57823/7409                                         | 1<br>4 |
| B<br>P | GO:00<br>30101 | natural killer<br>cell<br>activation               | 14/92<br>6 | 63/17913      | 3.<br>08<br>E-<br>06 | 4.<br>53<br>E-<br>05 | 3.34E-05 | 914/11151/84868/3134/50615/3689/5293/639/26191/5788/1<br>0125/57823/9760/7305                                             | 1<br>4 |
| B<br>P | GO:00<br>19724 | B cell<br>mediated<br>immunity                     | 25/92<br>6 | 173/1791<br>3 | 3.<br>08<br>E-<br>06 | 4.<br>53<br>E-<br>05 | 3.34E-05 | 695/712/713/714/717/718/720/721/730/930/939/940/972/342<br>6/1378/1380/2207/2208/2213/10875/3119/5788/710/55061/5<br>1311 | 2<br>5 |
| B<br>P | GO:00<br>50710 | negative<br>regulation of<br>cytokine<br>secretion | 15/92<br>6 | 72/17913      | 3.<br>26<br>E-<br>06 | 4.<br>77<br>E-<br>05 | 3.52E-05 | 301/384/55024/2213/2633/9734/7850/353514/10859/114548<br>/26191/5552/10333/51311/7128                                     | 1<br>5 |
| B<br>P | GO:00<br>01768 | establishe<br>ment of T cell<br>polarity           | 6/926      | 10/17913      | 3.<br>30<br>E-<br>06 | 4.<br>82<br>E-<br>05 | 3.55E-05 | 6363/6366/1236/56603/1794/9750                                                                                            | 6      |
| B<br>P | GO:00<br>31663 | lipopolysacc<br>haride-medi<br>ated<br>signaling   | 13/92<br>6 | 55/17913      | 3.<br>32<br>E-<br>06 | 4.<br>82<br>E-<br>05 | 3.56E-05 | 6347/6348/6352/4064/948/923/3055/3553/4057/23643/2619<br>1/7097/7128                                                      | 1<br>3 |

|        |                |                                                                        |            |               |                      |                      |          |                                                                                                                                                                                                              |        |
|--------|----------------|------------------------------------------------------------------------|------------|---------------|----------------------|----------------------|----------|--------------------------------------------------------------------------------------------------------------------------------------------------------------------------------------------------------------|--------|
| B<br>P | GO:00<br>32722 | pathway<br>positive<br>regulation of<br>chemokine<br>production        | 13/92<br>6 | 55/17913      | 3.<br>32<br>E-<br>06 | 4.<br>82<br>E-<br>05 | 3.56E-05 | 199/972/1436/1958/84868/3162/3553/9173/90865/3569/402<br>3/7097/51284                                                                                                                                        | 1<br>3 |
| B<br>P | GO:00<br>51924 | regulation of<br>calcium ion<br>transport                              | 31/92<br>6 | 244/1791<br>3 | 3.<br>50<br>E-<br>06 | 5.<br>07<br>E-<br>05 | 3.74E-05 | 150/9914/274/6347/6348/6351/6352/930/8832/57214/11151/<br>3627/6373/4283/7852/115352/3383/3603/353514/10859/102<br>88/23566/9722/5027/5031/5142/5294/6236/6622/6769/3426<br>67                               | 3<br>1 |
| B<br>P | GO:00<br>07411 | axon<br>guidance                                                       | 28/92<br>6 | 210/1791<br>3 | 4.<br>04<br>E-<br>06 | 5.<br>83<br>E-<br>05 | 4.30E-05 | 655/10752/1436/7852/1630/1749/1959/2048/2297/2674/281<br>7/3897/5818/4781/8013/4897/9423/5293/5588/5800/5649/59<br>79/6091/10371/57556/347733/10381/7422                                                     | 2<br>8 |
| B<br>P | GO:00<br>97242 | amyloid-bet<br>a clearance                                             | 10/92<br>6 | 33/17913      | 4.<br>05<br>E-<br>06 | 5.<br>83<br>E-<br>05 | 4.30E-05 | 348/718/728/948/3684/3689/4038/8685/4481/54209                                                                                                                                                               | 1<br>0 |
| B<br>P | GO:00<br>61098 | positive<br>regulation of<br>protein<br>tyrosine<br>kinase<br>activity | 13/92<br>6 | 56/17913      | 4.<br>12<br>E-<br>06 | 5.<br>91<br>E-<br>05 | 4.36E-05 | 150/389658/6352/1436/2069/2209/51704/353514/653361/30<br>84/5649/80725/26228                                                                                                                                 | 1<br>3 |
| B<br>P | GO:00<br>46629 | gamma-delt<br>a T cell<br>activation                                   | 7/926      | 15/17913      | 4.<br>31<br>E-<br>06 | 6.<br>17<br>E-<br>05 | 4.55E-05 | 1525/1960/120425/10859/3071/64127/5788                                                                                                                                                                       | 7      |
| B<br>P | GO:00<br>51701 | interaction<br>with host                                               | 28/92<br>6 | 211/1791<br>3 | 4.<br>44<br>E-<br>06 | 6.<br>33<br>E-<br>05 | 4.67E-05 | 290/30835/972/941/942/999/10332/1378/1380/1525/3576/78<br>52/1803/2219/2838/3304/3383/3434/8519/10581/10410/436<br>0/5818/5806/6404/5272/6504/11074                                                          | 2<br>8 |
| B<br>P | GO:00<br>43405 | regulation of<br>MAP kinase<br>activity                                | 37/92<br>6 | 322/1791<br>3 | 4.<br>62<br>E-<br>06 | 6.<br>58<br>E-<br>05 | 4.86E-05 | 150/348/655/728/6363/972/7852/1843/1906/2048/10595/232<br>2/2357/3553/11213/54900/23566/120892/11184/64127/3084<br>/5027/5063/5294/23533/26191/5788/10125/5979/5997/6091/<br>10333/8600/23043/7345/7422/9839 | 3<br>7 |
| B      | GO:00          | neuron                                                                 | 28/92      | 212/1791      | 4.                   | 6.                   | 5.10E-05 | 655/10752/1436/7852/1630/1749/1959/2048/2297/2674/281                                                                                                                                                        | 2      |



|        |                |                                                          |            |           |                      |                      |          |                                                                                                                                                                                                                                     |        |
|--------|----------------|----------------------------------------------------------|------------|-----------|----------------------|----------------------|----------|-------------------------------------------------------------------------------------------------------------------------------------------------------------------------------------------------------------------------------------|--------|
| P      | 97485          | projection guidance                                      | 6          | 3         | 86<br>E-<br>06       | 91<br>E-<br>05       |          | 7/3897/5818/4781/8013/4897/9423/5293/5588/5800/5649/5979/6091/10371/57556/347733/10381/7422                                                                                                                                         | 8      |
| B<br>P | GO:00<br>45576 | mast cell activation                                     | 13/92<br>6 | 57/17913  | 5.<br>08<br>E-<br>06 | 7.<br>20<br>E-<br>05 | 5.31E-05 | 30817/695/8832/2207/3162/3937/10397/8013/5293/5294/5880/10125/6812                                                                                                                                                                  | 1<br>3 |
| B<br>P | GO:00<br>02534 | cytokine production involved in inflammatory response    | 12/92<br>6 | 49/17913  | 5.<br>31<br>E-<br>06 | 7.<br>49<br>E-<br>05 | 5.53E-05 | 113/923/10225/115362/3620/7850/4210/197358/64127/5187/140885/10333                                                                                                                                                                  | 1<br>2 |
| B<br>P | GO:00<br>71248 | cellular response to metal ion                           | 24/92<br>6 | 167/17913 | 5.<br>32<br>E-<br>06 | 7.<br>50<br>E-<br>05 | 5.53E-05 | 107/113/84059/241/999/1536/1800/1906/3162/3725/120892/4318/4489/4493/4499/4501/4502/653361/10891/10235/6331/6622/7020/7054                                                                                                          | 2<br>4 |
| B<br>P | GO:20<br>00403 | positive regulation of lymphocyte migration              | 10/92<br>6 | 34/17913  | 5.<br>47<br>E-<br>06 | 7.<br>68<br>E-<br>05 | 5.67E-05 | 199/6364/6366/6348/6351/6352/729230/3627/10563/3676                                                                                                                                                                                 | 1<br>0 |
| B<br>P | GO:00<br>97186 | amelogenesis                                             | 8/926      | 21/17913  | 5.<br>51<br>E-<br>06 | 7.<br>72<br>E-<br>05 | 5.69E-05 | 1441/54757/3691/5818/152816/64065/6899/256764                                                                                                                                                                                       | 8      |
| B<br>P | GO:00<br>51222 | positive regulation of protein transport                 | 43/92<br>6 | 403/17913 | 5.<br>54<br>E-<br>06 | 7.<br>73<br>E-<br>05 | 5.71E-05 | 199/9447/27063/8938/640/6363/6348/929/914/29126/952/999/57214/1436/2219/55612/84868/3059/3553/3556/9173/90865/3569/3684/3689/353514/4023/120892/4321/23255/22861/114548/64127/5027/26191/5880/10125/7096/7097/51311/54209/7273/7447 | 4<br>3 |
| B<br>P | GO:00<br>02479 | antigen processing and presentation of exogenous peptide | 15/92<br>6 | 75/17913  | 5.<br>56<br>E-<br>06 | 7.<br>74<br>E-<br>05 | 5.71E-05 | 948/1536/2209/3105/3106/3107/3134/3136/653361/4688/4689/5696/5698/6890/6891                                                                                                                                                         | 1<br>5 |

|        |            |                                                                        |        |           |          |          |          |                                                                                                        |    |
|--------|------------|------------------------------------------------------------------------|--------|-----------|----------|----------|----------|--------------------------------------------------------------------------------------------------------|----|
|        |            | antigen via MHC class I, TAP-dependent                                 |        |           |          |          |          |                                                                                                        |    |
| B<br>P | GO:0042088 | T-helper 1 type immune response                                        | 11/926 | 42/17913  | 6.49E-06 | 9.01E-05 | 6.65E-05 | 301/6363/729230/941/84868/3594/3553/9173/90865/3718/6556                                               | 11 |
| B<br>P | GO:0002474 | antigen processing and presentation of peptide antigen via MHC class I | 17/926 | 95/17913  | 6.60E-06 | 9.14E-05 | 6.75E-05 | 948/1536/64167/2209/3105/3106/3107/3134/3136/10437/653361/4688/4689/5696/5698/6890/6891                | 17 |
| B<br>P | GO:0001767 | establishment of lymphocyte polarity                                   | 6/926  | 11/17913  | 6.93E-06 | 9.50E-05 | 7.01E-05 | 6363/6366/1236/56603/1794/9750                                                                         | 6  |
| B<br>P | GO:0032494 | response to peptidoglycan                                              | 6/926  | 11/17913  | 6.93E-06 | 9.50E-05 | 7.01E-05 | 728/3569/11213/114548/64127/54209                                                                      | 6  |
| B<br>P | GO:0033632 | regulation of cell-cell adhesion mediated by integrin                  | 6/926  | 11/17913  | 6.93E-06 | 9.50E-05 | 7.01E-05 | 100/6352/916/10563/1803/83706                                                                          | 6  |
| B<br>P | GO:0035747 | natural killer cell chemotaxis                                         | 6/926  | 11/17913  | 6.93E-06 | 9.50E-05 | 7.01E-05 | 6347/6348/6351/6352/5293/5294                                                                          | 6  |
| B<br>P | GO:0042476 | odontogenesis                                                          | 20/926 | 126/17913 | 7.05E-06 | 9.64E-05 | 7.11E-05 | 249/655/1441/1906/54757/3691/4038/5818/152816/64065/5251/860/6331/6899/7020/4982/8600/8626/7286/256764 | 20 |

|        |                |                                                                          |            |           |                      |                                 |          |                                                                                     |        |
|--------|----------------|--------------------------------------------------------------------------|------------|-----------|----------------------|---------------------------------|----------|-------------------------------------------------------------------------------------|--------|
| B<br>P | GO:00<br>50716 | positive<br>regulation of<br>interleukin-1<br>secretion                  | 10/92<br>6 | 35/17913  | 7.<br>30<br>E-<br>06 | 9.<br>94<br>E-<br>05            | 7.33E-05 | 9447/6363/6348/353514/4023/22861/114548/64127/5027/51311                            | 1<br>0 |
| B<br>P | GO:00<br>33631 | cell-cell<br>adhesion<br>mediated by<br>integrin                         | 7/926      | 16/17913  | 7.<br>31<br>E-<br>06 | 9.<br>94<br>E-<br>05            | 7.33E-05 | 100/6352/916/10563/1803/83706/3676                                                  | 7      |
| B<br>P | GO:00<br>30449 | regulation of<br>complement<br>activation                                | 19/92<br>6 | 116/17913 | 7.<br>45<br>E-<br>06 | 0.<br>00<br>01<br>00<br>92<br>2 | 7.45E-05 | 712/713/714/717/718/719/720/721/728/730/930/629/3426/1378/1380/3553/710/55061/11326 | 1<br>9 |
| B<br>P | GO:20<br>00514 | regulation of<br>CD4-positiv<br>e,<br>alpha-beta T<br>cell<br>activation | 13/92<br>6 | 59/17913  | 7.<br>64<br>E-<br>06 | 0.<br>00<br>01<br>03<br>20<br>9 | 7.62E-05 | 301/384/6363/29126/941/942/3594/3662/3718/3071/114548/5588/54440                    | 1<br>3 |
| B<br>P | GO:00<br>09595 | detection of<br>biotic<br>stimulus                                       | 8/926      | 22/17913  | 8.<br>27<br>E-<br>06 | 0.<br>00<br>01<br>11<br>43<br>9 | 8.22E-05 | 721/23643/114548/64127/7096/7097/10333/54209                                        | 8      |
| B<br>P | GO:00<br>43300 | regulation of<br>leukocyte<br>degranulatio<br>n                          | 11/92<br>6 | 43/17913  | 8.<br>31<br>E-<br>06 | 0.<br>00<br>01<br>11<br>43<br>9 | 8.22E-05 | 30817/729230/8832/2207/2213/3134/3162/3684/3689/5880/6812                           | 1<br>1 |
| B<br>P | GO:00<br>43303 | mast cell<br>degranulatio<br>n                                           | 11/92<br>6 | 43/17913  | 8.<br>31<br>E-<br>06 | 0.<br>00<br>01                  | 8.22E-05 | 30817/695/8832/2207/3162/8013/5293/5294/5880/10125/6812                             | 1<br>1 |

|        |                |                                                                     |            |               |                      |                                 |          |                                                                                                                                                                                                                                                           |        |
|--------|----------------|---------------------------------------------------------------------|------------|---------------|----------------------|---------------------------------|----------|-----------------------------------------------------------------------------------------------------------------------------------------------------------------------------------------------------------------------------------------------------------|--------|
|        |                |                                                                     |            |               | 06                   | 11<br>43<br>9                   |          |                                                                                                                                                                                                                                                           |        |
| B<br>P | GO:20<br>00257 | regulation of<br>protein<br>activation<br>cascade                   | 19/92<br>6 | 117/1791<br>3 | 8.<br>47<br>E-<br>06 | 0.<br>00<br>01<br>13<br>23<br>4 | 8.36E-05 | 712/713/714/717/718/719/720/721/728/730/930/629/3426/1378/1380/3553/710/55061/11326                                                                                                                                                                       | 1<br>9 |
| B<br>P | GO:00<br>71900 | regulation of<br>protein<br>serine/threo<br>nine kinase<br>activity | 48/92<br>6 | 479/1791<br>3 | 8.<br>97<br>E-<br>06 | 0.<br>00<br>01<br>19<br>60<br>1 | 8.83E-05 | 150/348/655/728/6363/894/972/57214/1436/7852/1843/1906/2048/10595/54757/2322/2357/51191/8091/3481/3553/11213/54900/23566/120892/4057/11184/64127/3084/5027/5063/5294/23533/5577/26191/5788/10125/5979/5997/6091/6622/10333/7128/8600/23043/7345/7422/9839 | 4<br>8 |
| B<br>P | GO:00<br>06956 | complement<br>activation                                            | 20/92<br>6 | 128/1791<br>3 | 9.<br>00<br>E-<br>06 | 0.<br>00<br>01<br>19<br>68<br>2 | 8.83E-05 | 712/713/714/717/718/719/720/721/728/730/930/629/3426/1378/1380/2219/3553/710/55061/11326                                                                                                                                                                  | 2<br>0 |
| B<br>P | GO:00<br>30099 | myeloid cell<br>differentiation                                     | 43/92<br>6 | 411/1791<br>3 | 9.<br>08<br>E-<br>06 | 0.<br>00<br>01<br>20<br>52<br>7 | 8.90E-05 | 714/6363/6348/1236/135228/972/1021/1436/1441/2124/2207/2811/29909/1880/3059/8356/8361/3218/3304/3428/10320/133396/3662/3394/3725/10859/11006/4057/4318/3071/8013/5293/8544/5579/5588/6688/7097/8600/54209/7305/10537/7422/7538                            | 4<br>3 |
| B<br>P | GO:00<br>02831 | regulation of<br>response to<br>biotic<br>stimulus                  | 21/92<br>6 | 139/1791<br>3 | 9.<br>27<br>E-<br>06 | 0.<br>00<br>01<br>22<br>7       | 9.06E-05 | 9447/384/330/4064/29126/948/55601/10875/84868/51191/3434/3594/3553/3559/5650/10859/4057/23643/4321/11005/7128                                                                                                                                             | 2<br>1 |
| B<br>P | GO:00<br>33077 | T cell<br>differentiation<br>in thymus                              | 14/92<br>6 | 69/17913      | 9.<br>53<br>E-<br>06 | 0.<br>00<br>01<br>25<br>83      | 9.29E-05 | 100/1236/940/915/916/972/1021/1794/1960/3575/5788/10125/9840/7535                                                                                                                                                                                         | 1<br>4 |

|        |                |                                                                                     |            |               |                      |                                 |             |                                                                                                                                                                                                                                                               |        |
|--------|----------------|-------------------------------------------------------------------------------------|------------|---------------|----------------------|---------------------------------|-------------|---------------------------------------------------------------------------------------------------------------------------------------------------------------------------------------------------------------------------------------------------------------|--------|
|        |                |                                                                                     |            |               |                      | 3                               |             |                                                                                                                                                                                                                                                               |        |
| B<br>P | GO:00<br>72606 | interleukin-8<br>secretion                                                          | 9/926      | 29/17913      | 9.<br>94<br>E-<br>06 | 0.<br>00<br>01<br>30<br>90<br>7 | 9.66E-05    | 301/929/914/1116/2219/26191/7096/7097/10333                                                                                                                                                                                                                   | 9      |
| B<br>P | GO:19<br>04951 | positive<br>regulation of<br>establishme<br>nt of protein<br>localization           | 45/92<br>6 | 440/1791<br>3 | 1.<br>02<br>E-<br>05 | 0.<br>00<br>01<br>33<br>35<br>6 | 9.84E-05    | 199/9447/27063/8938/640/6363/6348/929/914/29126/952/99<br>9/57214/1436/2219/55612/3002/84868/3059/3553/3556/917<br>3/90865/3569/3684/3689/353514/4023/120892/4321/23255/<br>22861/114548/64127/5027/26191/5880/10125/7096/7097/51<br>311/8626/54209/7273/7447 | 4<br>5 |
| B<br>P | GO:00<br>51091 | positive<br>regulation of<br>DNA-bindin<br>g<br>transcription<br>factor<br>activity | 31/92<br>6 | 257/1791<br>3 | 1.<br>02<br>E-<br>05 | 0.<br>00<br>01<br>33<br>87      | 9.88E-05    | 107/9447/306/695/948/1906/2099/3059/3304/3383/3553/355<br>6/3569/11213/3689/4057/150372/114548/64127/10891/5579<br>/5588/5649/54101/6279/7097/10333/8600/10346/11074/742<br>2                                                                                 | 3<br>1 |
| B<br>P | GO:00<br>70997 | neuron<br>death                                                                     | 38/92<br>6 | 347/1791<br>3 | 1.<br>06<br>E-<br>05 | 0.<br>00<br>01<br>39<br>00<br>4 | 0.000102589 | 348/712/728/6347/6348/6352/10752/11151/1630/112399/19<br>58/2213/2729/10457/2904/3134/3162/3684/3689/3725/8564/<br>120892/4804/22861/4929/8013/26471/5063/10891/54463/66<br>22/6648/6812/7020/7068/10333/8626/7305                                            | 3<br>8 |
| B<br>P | GO:00<br>02287 | alpha-beta T<br>cell<br>activation<br>involved in<br>immune<br>response             | 13/92<br>6 | 61/17913      | 1.<br>13<br>E-<br>05 | 0.<br>00<br>01<br>46<br>27<br>5 | 0.000107954 | 301/6363/941/942/8320/1880/3594/3569/3662/3718/4063/11<br>4548/114836                                                                                                                                                                                         | 1<br>3 |
| B<br>P | GO:00<br>02293 | alpha-beta T<br>cell<br>differentiatio<br>n involved in<br>immune                   | 13/92<br>6 | 61/17913      | 1.<br>13<br>E-<br>05 | 0.<br>00<br>01<br>46<br>27      | 0.000107954 | 301/6363/941/942/8320/1880/3594/3569/3662/3718/4063/11<br>4548/114836                                                                                                                                                                                         | 1<br>3 |

|        |                |                                                                                 |            |               |                      |                                 |             |                                                                                                                                                                                                         |        |
|--------|----------------|---------------------------------------------------------------------------------|------------|---------------|----------------------|---------------------------------|-------------|---------------------------------------------------------------------------------------------------------------------------------------------------------------------------------------------------------|--------|
|        |                | response                                                                        |            |               |                      | 5                               |             |                                                                                                                                                                                                         |        |
| B<br>P | GO:00<br>71902 | positive<br>regulation of<br>protein<br>serine/threo<br>nine kinase<br>activity | 36/92<br>6 | 322/1791<br>3 | 1.<br>14<br>E-<br>05 | 0.<br>00<br>01<br>48<br>39<br>1 | 0.000109517 | 150/728/6363/894/972/57214/1436/7852/1906/10595/54757/<br>2322/2357/8091/3481/3553/23566/120892/4057/11184/6412<br>7/3084/5027/5063/5294/23533/5788/10125/5979/6091/6622/<br>10333/8600/23043/7422/9839 | 3<br>6 |
| B<br>P | GO:00<br>07162 | negative<br>regulation of<br>cell<br>adhesion                                   | 32/92<br>6 | 271/1791<br>3 | 1.<br>15<br>E-<br>05 | 0.<br>00<br>01<br>48<br>65<br>1 | 0.000109709 | 27299/84830/301/384/6366/29126/972/999/1493/1843/2213/<br>2633/2651/10457/84868/3620/3559/3718/3902/54900/10859<br>/10288/4321/80380/5140/5365/26191/5788/5800/9750/5755<br>6/11326                     | 3<br>2 |
| B<br>P | GO:00<br>02643 | regulation of<br>tolerance<br>induction                                         | 7/926      | 17/17913      | 1.<br>19<br>E-<br>05 | 0.<br>00<br>01<br>52<br>80<br>7 | 0.000112776 | 29126/916/84868/3620/3559/11213/10288                                                                                                                                                                   | 7      |
| B<br>P | GO:19<br>03980 | positive<br>regulation of<br>microglial<br>cell<br>activation                   | 7/926      | 17/17913      | 1.<br>19<br>E-<br>05 | 0.<br>00<br>01<br>52<br>80<br>7 | 0.000112776 | 712/6348/3684/3689/120892/26228/54209                                                                                                                                                                   | 7      |
| B<br>P | GO:00<br>32637 | interleukin-8<br>production                                                     | 15/92<br>6 | 80/17913      | 1.<br>27<br>E-<br>05 | 0.<br>00<br>01<br>63<br>04<br>9 | 0.000120335 | 301/929/914/1116/2219/3304/3553/64127/26191/5788/7096/<br>7097/10333/51284/51311                                                                                                                        | 1<br>5 |
| B<br>P | GO:00<br>45861 | negative<br>regulation of<br>proteolysis                                        | 36/92<br>6 | 324/1791<br>3 | 1.<br>31<br>E-<br>05 | 0.<br>00<br>01<br>67<br>99<br>8 | 0.000123987 | 653145/274/718/720/721/135228/939/960/340267/1285/137<br>8/1476/1800/3428/2537/7850/27074/4018/120892/4057/431<br>8/4804/89932/51050/5266/5329/5272/710/6622/11005/9806/<br>50859/7035/7980/7422/11326  | 3<br>6 |

|        |                |                                                                                                                    |            |               |                      |                                 |             |                                                                                           |        |
|--------|----------------|--------------------------------------------------------------------------------------------------------------------|------------|---------------|----------------------|---------------------------------|-------------|-------------------------------------------------------------------------------------------|--------|
| B<br>P | GO:00<br>02279 | mast cell<br>activation<br>involved in<br>immune<br>response                                                       | 11/92<br>6 | 45/17913      | 1.<br>33<br>E-<br>05 | 0.<br>00<br>01<br>69<br>86<br>3 | 0.000125363 | 30817/695/8832/2207/3162/8013/5293/5294/5880/10125/68<br>12                               | 1<br>1 |
| B<br>P | GO:00<br>02820 | negative<br>regulation of<br>adaptive<br>immune<br>response                                                        | 11/92<br>6 | 45/17913      | 1.<br>33<br>E-<br>05 | 0.<br>00<br>01<br>69<br>86<br>3 | 0.000125363 | 1378/2213/84868/3134/9173/90865/3575/3718/10859/5788/<br>64092                            | 1<br>1 |
| B<br>P | GO:00<br>02495 | antigen<br>processing<br>and<br>presentation<br>of peptide<br>antigen via<br>MHC class<br>II                       | 17/92<br>6 | 100/1791<br>3 | 1.<br>34<br>E-<br>05 | 0.<br>00<br>01<br>70<br>55<br>4 | 0.000125873 | 972/1514/2213/3108/3109/3112/3113/3115/3118/3119/3120/<br>3122/3123/3125/10437/3902/54209 | 1<br>7 |
| B<br>P | GO:19<br>03556 | negative<br>regulation of<br>tumor<br>necrosis<br>factor<br>superfamily<br>cytokine<br>production                  | 14/92<br>6 | 71/17913      | 1.<br>35<br>E-<br>05 | 0.<br>00<br>01<br>70<br>82<br>3 | 0.000126072 | 54/384/29126/10457/84868/11213/10859/4057/197358/2619<br>1/140885/6504/7128/54209         | 1<br>4 |
| B<br>P | GO:00<br>02504 | antigen<br>processing<br>and<br>presentation<br>of peptide or<br>polysacchari<br>de antigen<br>via MHC<br>class II | 17/92<br>6 | 101/1791<br>3 | 1.<br>54<br>E-<br>05 | 0.<br>00<br>01<br>94<br>37<br>5 | 0.000143454 | 972/1514/2213/3108/3109/3112/3113/3115/3118/3119/3120/<br>3122/3123/3125/10437/3902/54209 | 1<br>7 |

|        |                |                                                                |            |               |                      |                                 |             |                                                                                                                            |        |
|--------|----------------|----------------------------------------------------------------|------------|---------------|----------------------|---------------------------------|-------------|----------------------------------------------------------------------------------------------------------------------------|--------|
| B<br>P | GO:00<br>32677 | regulation of<br>interleukin-8<br>production                   | 14/92<br>6 | 72/17913      | 1.<br>59<br>E-<br>05 | 0.<br>00<br>02<br>01<br>08<br>7 | 0.000148408 | 301/929/914/2219/3304/3553/64127/26191/5788/7096/7097/<br>10333/51284/51311                                                | 1<br>4 |
| B<br>P | GO:00<br>46637 | regulation of<br>alpha-beta T<br>cell<br>differentiation       | 13/92<br>6 | 63/17913      | 1.<br>63<br>E-<br>05 | 0.<br>00<br>02<br>05<br>05<br>1 | 0.000151333 | 100/301/6363/941/942/3594/3662/3718/3071/114548/639/54<br>440/7535                                                         | 1<br>3 |
| B<br>P | GO:00<br>70231 | T cell<br>apoptotic<br>process                                 | 11/92<br>6 | 46/17913      | 1.<br>67<br>E-<br>05 | 0.<br>00<br>02<br>09<br>74<br>5 | 0.000154798 | 100/384/6352/939/29126/3620/3559/3575/3718/5588/1831                                                                       | 1<br>1 |
| B<br>P | GO:00<br>32897 | negative<br>regulation of<br>viral<br>transcription            | 8/926      | 24/17913      | 1.<br>73<br>E-<br>05 | 0.<br>00<br>02<br>16<br>96      | 0.000160122 | 6348/6351/6352/8091/10410/3725/11074/7538                                                                                  | 8      |
| B<br>P | GO:00<br>71347 | cellular<br>response to<br>interleukin-1                       | 22/92<br>6 | 156/1791<br>3 | 1.<br>76<br>E-<br>05 | 0.<br>00<br>02<br>19<br>45<br>4 | 0.000161963 | 27063/6347/6348/6352/1116/3576/1906/1958/2633/3383/35<br>53/7850/3556/3569/11213/8564/64127/5696/5698/140885/6<br>662/7035 | 2<br>2 |
| B<br>P | GO:00<br>02675 | positive<br>regulation of<br>acute<br>inflammatory<br>response | 9/926      | 31/17913      | 1.<br>82<br>E-<br>05 | 0.<br>00<br>02<br>27<br>03<br>2 | 0.000167556 | 695/718/1236/2207/3553/3569/9180/5294/8600                                                                                 | 9      |
| B<br>P | GO:00<br>01911 | negative<br>regulation of                                      | 7/926      | 18/17913      | 1.<br>86             | 0.<br>00                        | 0.000169434 | 2213/84868/3134/3575/10859/5788/5272                                                                                       | 7      |



|        |             |                                                  |        |           |          |             |                                                                                                                                                                                                                        |    |  |
|--------|-------------|--------------------------------------------------|--------|-----------|----------|-------------|------------------------------------------------------------------------------------------------------------------------------------------------------------------------------------------------------------------------|----|--|
|        |             | leukocyte mediated cytotoxicity                  |        |           | E-05     | 0229578     |                                                                                                                                                                                                                        |    |  |
| B<br>P | GO:0032693  | negative regulation of interleukin-10 production | 7/926  | 18/17913  | 1.86E-05 | 0.000169434 | 29126/2213/3620/3718/10859/80380/7305                                                                                                                                                                                  | 7  |  |
| B<br>P | GO:0098581  | detection of external biotic stimulus            | 7/926  | 18/17913  | 1.86E-05 | 0.000169434 | 721/23643/64127/7096/7097/10333/54209                                                                                                                                                                                  | 7  |  |
| B<br>P | GO:0007249  | I-kappaB kinase/NF-kappaB signaling              | 30/926 | 253/17913 | 1.97E-05 | 0.00017953  | 330/695/6363/6366/1236/929/948/972/2099/51704/3162/3553/4057/23643/197358/64127/5187/11040/5579/6398/140885/7052/7097/10333/51284/51311/7128/8600/10346/10537                                                          | 30 |  |
| B<br>P | GO:0006836  | neurotransmitter transport                       | 29/926 | 241/17913 | 2.05E-05 | 0.000185766 | 100/107/321/8862/8938/695/1906/2207/8564/10859/120892/4129/79772/5027/8497/55607/5579/5997/6507/6581/6538/6535/6622/9627/6812/91683/7054/8600/9256                                                                     | 29 |  |
| B<br>P | GO:00072507 | divalent inorganic cation homeostasis            | 42/926 | 412/17913 | 2.15E-05 | 0.000194747 | 348/719/6357/6363/6366/6348/6352/729230/1236/930/948/952/1043/57214/11151/3627/6373/10563/4283/1906/2099/54757/2903/2904/3792/3932/23566/931/5027/5031/5294/5579/5788/22821/79608/6279/6556/6622/7052/147138/8600/9256 | 42 |  |
| B<br>P | GO:0001222  | regulation of NIK/NF-kappaB                      | 18/926 | 114/17913 | 2.16E-05 | 0.000194747 | 222487/655/6363/929/939/1116/1906/84868/3553/197358/14548/64127/4306/26191/7097/10333/51284/54209                                                                                                                      | 18 |  |

|        |                |                                                                                   |            |               |                      |                                 |             |                                                                                                                                                                    |        |
|--------|----------------|-----------------------------------------------------------------------------------|------------|---------------|----------------------|---------------------------------|-------------|--------------------------------------------------------------------------------------------------------------------------------------------------------------------|--------|
|        |                | signaling                                                                         |            |               | 05                   | 63                              |             |                                                                                                                                                                    |        |
|        |                |                                                                                   |            |               | 87                   | 5                               |             |                                                                                                                                                                    |        |
| B<br>P | GO:00<br>02455 | humoral<br>immune<br>response<br>mediated by<br>circulating<br>immunoglob<br>ulin | 17/92<br>6 | 104/1791<br>3 | 2.<br>28<br>E-<br>05 | 0.<br>00<br>02<br>78<br>94<br>4 | 0.000205868 | 712/713/714/717/718/720/721/730/3426/1378/1380/2208/22<br>13/3119/5788/710/55061                                                                                   | 1<br>7 |
| B<br>P | GO:00<br>07204 | positive<br>regulation of<br>cytosolic<br>calcium ion<br>concentratio<br>n        | 30/92<br>6 | 255/1791<br>3 | 2.<br>30<br>E-<br>05 | 0.<br>00<br>02<br>79<br>80<br>2 | 0.000206501 | 719/6363/6366/6348/1236/930/948/952/1043/57214/11151/3<br>627/6373/10563/4283/1906/2099/2903/2904/3932/23566/93<br>1/5027/5031/5294/5788/22821/79608/6622/7052     | 3<br>0 |
| B<br>P | GO:00<br>32733 | positive<br>regulation of<br>interleukin-1<br>0 production                        | 9/926      | 32/17913      | 2.<br>42<br>E-<br>05 | 0.<br>00<br>02<br>94<br>23<br>4 | 0.000217153 | 29126/940/2207/3662/353514/64127/54440/7097/54209                                                                                                                  | 9      |
| B<br>P | GO:00<br>90025 | regulation of<br>monocyte<br>chemotaxis                                           | 8/926      | 25/17913      | 2.<br>43<br>E-<br>05 | 0.<br>00<br>02<br>94<br>47<br>4 | 0.000217329 | 199/6352/729230/3627/1843/2358/7941/56833                                                                                                                          | 8      |
| B<br>P | GO:20<br>00482 | regulation of<br>interleukin-8<br>secretion                                       | 8/926      | 25/17913      | 2.<br>43<br>E-<br>05 | 0.<br>00<br>02<br>94<br>47<br>4 | 0.000217329 | 301/929/914/2219/26191/7096/7097/10333                                                                                                                             | 8      |
| B<br>P | GO:00<br>72593 | reactive<br>oxygen<br>species                                                     | 31/92<br>6 | 269/1791<br>3 | 2.<br>54<br>E-       | 0.<br>00<br>03                  | 0.000225926 | 54/575/199/384/655/948/1536/1906/2358/3099/3383/2537/3<br>553/3684/3689/120892/4129/653361/4688/9722/5027/5806/<br>5880/140885/6622/6648/7020/7097/10333/7305/7409 | 3<br>1 |

|        |                |                                                                                                                                                  |            |               |                      |                                 |             |                                                                                                                                                                                                                                     |        |
|--------|----------------|--------------------------------------------------------------------------------------------------------------------------------------------------|------------|---------------|----------------------|---------------------------------|-------------|-------------------------------------------------------------------------------------------------------------------------------------------------------------------------------------------------------------------------------------|--------|
|        |                | metabolic process                                                                                                                                |            |               | 05                   | 06                              |             |                                                                                                                                                                                                                                     |        |
|        |                |                                                                                                                                                  |            |               |                      | 12                              |             |                                                                                                                                                                                                                                     |        |
|        |                |                                                                                                                                                  |            |               |                      | 2                               |             |                                                                                                                                                                                                                                     |        |
| B<br>P | GO:00<br>01505 | regulation of neurotransmitter levels                                                                                                            | 35/92<br>6 | 321/1791<br>3 | 2.<br>57<br>E-<br>05 | 0.<br>00<br>03<br>09<br>33<br>2 | 0.000228295 | 54/107/199/321/384/8938/948/1806/1906/2903/3383/3553/3689/8564/120892/4129/79772/9722/5027/8497/55607/5579/5806/5997/140885/6507/6581/6622/9627/6812/91683/7054/7097/10333/9256                                                     | 3<br>5 |
| B<br>P | GO:00<br>02686 | negative regulation of leukocyte migration                                                                                                       | 11/92<br>6 | 48/17913      | 2.<br>58<br>E-<br>05 | 0.<br>00<br>03<br>09<br>33<br>2 | 0.000228295 | 100/84830/6347/6366/1843/3162/90865/11240/9750/56833/26228                                                                                                                                                                          | 1<br>1 |
| B<br>P | GO:00<br>51090 | regulation of DNA-binding transcription factor activity                                                                                          | 43/92<br>6 | 429/1791<br>3 | 2.<br>59<br>E-<br>05 | 0.<br>00<br>03<br>10<br>40<br>1 | 0.000229084 | 107/222487/9447/306/655/695/948/1906/8320/2099/84868/3055/3059/3162/3304/3383/3553/3556/3569/11213/3689/3725/4057/150372/197358/84166/114548/64127/26471/10891/5579/5588/5649/54101/6279/6446/7097/10333/7128/8600/10346/11074/7422 | 4<br>3 |
| B<br>P | GO:00<br>02823 | negative regulation of adaptive immune response based on somatic recombination of immune receptors built from immunoglobulin superfamily domains | 10/92<br>6 | 40/17913      | 2.<br>66<br>E-<br>05 | 0.<br>00<br>03<br>18<br>48<br>8 | 0.000235052 | 1378/2213/84868/3134/9173/90865/3575/3718/10859/5788                                                                                                                                                                                | 1<br>0 |

|        |                |                                                                       |            |               |                      |                                 |             |                                                                                                                                                                       |        |
|--------|----------------|-----------------------------------------------------------------------|------------|---------------|----------------------|---------------------------------|-------------|-----------------------------------------------------------------------------------------------------------------------------------------------------------------------|--------|
| B<br>P | GO:00<br>09410 | response to<br>xenobiotic<br>stimulus                                 | 31/92<br>6 | 270/1791<br>3 | 2.<br>73<br>E-<br>05 | 0.<br>00<br>03<br>25<br>28      | 0.000240065 | 5244/100/199/7852/56603/1562/1557/1573/1577/1800/1906/<br>1958/2327/2328/2729/2903/9734/3359/3383/64757/4929/10<br>891/5577/5742/26575/5997/6622/6799/27284/6999/7054 | 3<br>1 |
| B<br>P | GO:00<br>02292 | T cell<br>differentiation<br>involved in<br>immune<br>response        | 13/92<br>6 | 66/17913      | 2.<br>76<br>E-<br>05 | 0.<br>00<br>03<br>28<br>20<br>2 | 0.000242221 | 301/6363/941/942/8320/1880/3594/3569/3662/3718/4063/11<br>4548/114836                                                                                                 | 1<br>3 |
| B<br>P | GO:00<br>02827 | positive<br>regulation of<br>T-helper 1<br>type<br>immune<br>response | 7/926      | 19/17913      | 2.<br>81<br>E-<br>05 | 0.<br>00<br>03<br>32<br>69<br>8 | 0.00024554  | 301/6363/729230/941/3594/3553/6556                                                                                                                                    | 7      |
| B<br>P | GO:00<br>02922 | positive<br>regulation of<br>humoral<br>immune<br>response            | 7/926      | 19/17913      | 2.<br>81<br>E-<br>05 | 0.<br>00<br>03<br>32<br>69<br>8 | 0.00024554  | 718/1236/2208/2213/3553/5650/5788                                                                                                                                     | 7      |
| B<br>P | GO:00<br>42554 | superoxide<br>anion<br>generation                                     | 9/926      | 33/17913      | 3.<br>18<br>E-<br>05 | 0.<br>00<br>03<br>75<br>32<br>8 | 0.000277002 | 54/1536/1906/2358/3684/3689/653361/4688/7305                                                                                                                          | 9      |
| B<br>P | GO:00<br>42093 | T-helper cell<br>differentiation                                      | 12/92<br>6 | 58/17913      | 3.<br>34<br>E-<br>05 | 0.<br>00<br>03<br>93<br>66<br>7 | 0.000290536 | 301/6363/941/942/1880/3594/3569/3662/3718/4063/114548/<br>114836                                                                                                      | 1<br>2 |
| B<br>P | GO:00<br>51346 | negative<br>regulation of                                             | 42/92<br>6 | 420/1791<br>3 | 3.<br>39             | 0.<br>00                        | 0.000293839 | 653145/341/274/718/720/721/135228/939/960/340267/1285/<br>1378/1476/1800/3001/9734/3428/2537/3434/10788/27074/4                                                       | 4<br>2 |

|        |            |                                                                                   |        |           |          |             |             |                                                                                                                                                                                                                                              |    |
|--------|------------|-----------------------------------------------------------------------------------|--------|-----------|----------|-------------|-------------|----------------------------------------------------------------------------------------------------------------------------------------------------------------------------------------------------------------------------------------------|----|
|        |            | hydrolase activity                                                                |        |           | E-05     | 0398142     |             | 018/120892/4057/4318/3071/4804/89932/51050/5266/5329/5365/5806/5997/5272/6622/11005/9806/50859/7035/7980/7422                                                                                                                                |    |
| B<br>P | GO:0019886 | antigen processing and presentation of exogenous peptide antigen via MHC class II | 16/926 | 97/17913  | 3.52E-05 | 0.000304588 | 0.000304588 | 972/1514/2213/3108/3109/3112/3113/3115/3118/3119/3120/3122/3123/3125/10437/3902                                                                                                                                                              | 16 |
| B<br>P | GO:1901652 | response to peptide                                                               | 47/926 | 491/17913 | 3.58E-05 | 0.000309101 | 0.000309101 | 107/113/374/655/948/1536/1906/1958/1959/2069/2213/2358/2729/2650/9734/3383/3481/3553/3676/3718/688/4023/4321/4318/51237/4804/22861/64127/3164/4929/8013/5140/5251/5577/5579/5588/26191/143686/6513/7031/7054/7097/10333/7128/54209/7253/7412 | 47 |
| B<br>P | GO:1901214 | regulation of neuron death                                                        | 34/926 | 313/17913 | 3.61E-05 | 0.000311213 | 0.000311213 | 348/712/728/6347/6348/6352/10752/11151/1630/112399/1958/2213/2729/10457/2904/3134/3162/3684/3689/3725/8564/120892/4929/8013/26471/5063/10891/54463/6622/6648/6812/7020/10333/7305                                                            | 34 |
| B<br>P | GO:0006898 | receptor-mediated endocytosis                                                     | 33/926 | 301/17913 | 3.89E-05 | 0.000334682 | 0.000334682 | 8862/341/348/718/6363/6366/929/9332/948/8029/3576/3577/1601/9829/2207/2209/2213/2350/2358/3676/3684/3689/3512/10859/8685/4360/4481/6401/9892/6622/23166/55576/7422                                                                           | 33 |
| B<br>P | GO:0044546 | NLRP3 inflammasome complex assembly                                               | 6/926  | 14/17913  | 3.94E-05 | 0.000338128 | 0.000338128 | 948/115362/4210/197358/114548/10333                                                                                                                                                                                                          | 6  |

|        |                |                                                                          |            |               |                      |                                 |             |                                                                                                                                                                                                                      |        |
|--------|----------------|--------------------------------------------------------------------------|------------|---------------|----------------------|---------------------------------|-------------|----------------------------------------------------------------------------------------------------------------------------------------------------------------------------------------------------------------------|--------|
|        |                |                                                                          |            |               |                      | 3                               |             |                                                                                                                                                                                                                      |        |
| B<br>P | GO:00<br>42267 | natural killer<br>cell<br>mediated<br>cytotoxicity                       | 12/92<br>6 | 59/17913      | 4.<br>00<br>E-<br>05 | 0.<br>00<br>04<br>63<br>64<br>9 | 0.000342185 | 11151/3002/84868/3134/3902/10859/10125/5272/4068/1148<br>36/57823/7409                                                                                                                                               | 1<br>2 |
| B<br>P | GO:00<br>02438 | acute<br>inflammator<br>y response<br>to antigenic<br>stimulus           | 7/926      | 20/17913      | 4.<br>13<br>E-<br>05 | 0.<br>00<br>04<br>75<br>72<br>2 | 0.000351095 | 695/718/1236/923/2207/2213/3383                                                                                                                                                                                      | 7      |
| B<br>P | GO:00<br>33630 | positive<br>regulation of<br>cell<br>adhesion<br>mediated by<br>integrin | 7/926      | 20/17913      | 4.<br>13<br>E-<br>05 | 0.<br>00<br>04<br>75<br>72<br>2 | 0.000351095 | 6366/6352/916/10563/55612/3071/5979                                                                                                                                                                                  | 7      |
| B<br>P | GO:00<br>34505 | tooth<br>mineralizati<br>on                                              | 7/926      | 20/17913      | 4.<br>13<br>E-<br>05 | 0.<br>00<br>04<br>75<br>72<br>2 | 0.000351095 | 249/54757/5818/152816/6899/7020/256764                                                                                                                                                                               | 7      |
| B<br>P | GO:00<br>02715 | regulation of<br>natural killer<br>cell<br>mediated<br>immunity          | 10/92<br>6 | 42/17913      | 4.<br>21<br>E-<br>05 | 0.<br>00<br>04<br>83<br>82<br>6 | 0.000357076 | 10225/84868/3134/3902/10859/10125/5272/4068/114836/74<br>09                                                                                                                                                          | 1<br>0 |
| B<br>P | GO:00<br>45765 | regulation of<br>angiogenesi<br>s                                        | 39/92<br>6 | 383/1791<br>3 | 4.<br>30<br>E-<br>05 | 0.<br>00<br>04<br>93<br>15<br>7 | 0.000363963 | 56999/575/10000/301/306/718/719/728/147372/729230/111<br>6/1285/3627/10563/3576/7852/1536/5168/2152/10457/9734/<br>3099/8091/3162/3553/3569/3687/3689/3696/4804/5140/260<br>51/5579/57556/11005/23166/7128/7422/7453 | 3<br>9 |

|        |                |                                                 |            |               |                      |                                 |             |                                                                                                                                                                                                                                    |        |
|--------|----------------|-------------------------------------------------|------------|---------------|----------------------|---------------------------------|-------------|------------------------------------------------------------------------------------------------------------------------------------------------------------------------------------------------------------------------------------|--------|
| B<br>P | GO:00<br>19079 | viral<br>genome<br>replication                  | 18/92<br>6 | 120/1791<br>3 | 4.<br>37<br>E-<br>05 | 0.<br>00<br>04<br>99<br>67      | 0.000368769 | 6347/6352/30835/940/10332/3576/10663/8091/3428/3429/3<br>434/8519/10581/10410/4057/4599/8638/91543                                                                                                                                 | 1<br>8 |
| B<br>P | GO:19<br>01342 | regulation of<br>vasculature<br>developmen<br>t | 42/92<br>6 | 425/1791<br>3 | 4.<br>46<br>E-<br>05 | 0.<br>00<br>05<br>08<br>65<br>2 | 0.000375398 | 56999/575/10000/301/306/655/718/719/728/147372/729230/<br>1116/1285/3627/10563/3576/7852/1536/1958/5168/2152/10<br>457/9734/3099/8091/3162/3553/3569/3687/3689/3696/4804/<br>5140/26051/5579/57556/6648/11005/23166/7128/7422/7453 | 4<br>2 |
| B<br>P | GO:00<br>08361 | regulation of<br>cell size                      | 21/92<br>6 | 154/1791<br>3 | 4.<br>50<br>E-<br>05 | 0.<br>00<br>05<br>11<br>89      | 0.000377788 | 10000/348/1630/1906/23105/3575/3792/3897/23566/4478/4<br>897/9423/10439/5027/5341/5979/10371/375611/6696/7409/<br>7422                                                                                                             | 2<br>1 |
| B<br>P | GO:00<br>31214 | biomineral<br>tissue<br>developmen<br>t         | 21/92<br>6 | 154/1791<br>3 | 4.<br>50<br>E-<br>05 | 0.<br>00<br>05<br>11<br>89      | 0.000377788 | 84059/249/655/6348/54757/2201/2261/10457/4057/5818/47<br>45/152816/5027/5251/6662/6696/5552/6899/7020/7286/256<br>764                                                                                                              | 2<br>1 |
| B<br>P | GO:00<br>01782 | B cell<br>homeostasi<br>s                       | 8/926      | 27/17913      | 4.<br>56<br>E-<br>05 | 0.<br>00<br>05<br>15<br>47<br>2 | 0.000380431 | 100/972/55619/139818/3071/124976/7128/10673                                                                                                                                                                                        | 8      |
| B<br>P | GO:00<br>35456 | response to<br>interferon-b<br>eta              | 8/926      | 27/17913      | 4.<br>56<br>E-<br>05 | 0.<br>00<br>05<br>15<br>47<br>2 | 0.000380431 | 9447/3428/8519/10581/10410/4332/149628/54739                                                                                                                                                                                       | 8      |
| B<br>P | GO:00<br>01894 | tissue<br>homeostasi<br>s                       | 26/92<br>6 | 214/1791<br>3 | 4.<br>57<br>E-<br>05 | 0.<br>00<br>05<br>16            | 0.000381129 | 84059/10000/729230/952/11151/1436/8029/1525/2651/5383<br>2/3569/3512/4057/4069/4117/4583/64127/5027/5880/54440/<br>6662/7128/4982/8600/7399/7422                                                                                   | 2<br>6 |

|        |                |                                                                                               |            |               |                      |                                 |             |                                                                                                                                                                                                                                                         |        |
|--------|----------------|-----------------------------------------------------------------------------------------------|------------|---------------|----------------------|---------------------------------|-------------|---------------------------------------------------------------------------------------------------------------------------------------------------------------------------------------------------------------------------------------------------------|--------|
|        |                |                                                                                               |            |               |                      | 41<br>7                         |             |                                                                                                                                                                                                                                                         |        |
| B<br>P | GO:00<br>02294 | CD4-positive,<br>alpha-beta T<br>cell<br>differentiation<br>involved in<br>immune<br>response | 12/92<br>6 | 60/17913      | 4.<br>76<br>E-<br>05 | 0.<br>00<br>05<br>36<br>65<br>5 | 0.000396065 | 301/6363/941/942/1880/3594/3569/3662/3718/4063/114548/<br>114836                                                                                                                                                                                        | 1<br>2 |
| B<br>P | GO:00<br>50871 | positive<br>regulation of<br>B cell<br>activation                                             | 13/92<br>6 | 70/17913      | 5.<br>29<br>E-<br>05 | 0.<br>00<br>05<br>94<br>25<br>4 | 0.000438575 | 100/695/939/940/952/972/115352/1880/3569/3071/64127/57<br>88/10673                                                                                                                                                                                      | 1<br>3 |
| B<br>P | GO:00<br>50792 | regulation of<br>viral process                                                                | 25/92<br>6 | 204/1791<br>3 | 5.<br>51<br>E-<br>05 | 0.<br>00<br>06<br>18<br>39<br>2 | 0.000456389 | 348/6348/6351/6352/940/972/3576/7852/2219/8091/3428/34<br>29/3434/8519/10581/10410/3725/27074/4057/4599/8638/58<br>06/91543/11074/7538                                                                                                                  | 2<br>5 |
| B<br>P | GO:00<br>55074 | calcium ion<br>homeostasis                                                                    | 39/92<br>6 | 388/1791<br>3 | 5.<br>72<br>E-<br>05 | 0.<br>00<br>06<br>39<br>62<br>8 | 0.000472062 | 348/719/6357/6363/6366/6348/6352/729230/1236/930/948/9<br>52/1043/57214/11151/3627/6373/10563/4283/1906/2099/54<br>757/2903/2904/3792/3932/23566/931/5027/5031/5294/5579/<br>5788/22821/79608/6622/7052/8600/9256                                       | 3<br>9 |
| B<br>P | GO:00<br>48871 | multicellular<br>organismal<br>homeostasis                                                    | 45/92<br>6 | 472/1791<br>3 | 5.<br>74<br>E-<br>05 | 0.<br>00<br>06<br>41<br>19<br>3 | 0.000473217 | 107/113/84059/10000/216/8862/729230/948/952/11151/143<br>6/8029/1525/7852/56603/1958/2171/2651/3553/53832/3569/<br>3662/3512/4057/4069/4117/4583/64127/8013/5027/51316/2<br>3228/10891/5577/5880/54440/6556/6662/7128/4982/8600/8<br>626/7253/7399/7422 | 4<br>5 |
| B<br>P | GO:00<br>35455 | response to<br>interferon-alpha                                                               | 7/926      | 21/17913      | 5.<br>92<br>E-<br>06 | 0.<br>00<br>06                  | 0.000486628 | 3433/3437/8519/10581/10410/27074/149628                                                                                                                                                                                                                 | 7      |



|        |                |                                                       |            |               |                      |                                 |             |                                                                                                                                    |        |
|--------|----------------|-------------------------------------------------------|------------|---------------|----------------------|---------------------------------|-------------|------------------------------------------------------------------------------------------------------------------------------------|--------|
|        |                |                                                       |            |               | 05                   | 59                              |             |                                                                                                                                    |        |
|        |                |                                                       |            |               |                      | 36                              |             |                                                                                                                                    |        |
|        |                |                                                       |            |               |                      | 5                               |             |                                                                                                                                    |        |
| B<br>P | GO:00<br>50869 | negative<br>regulation of<br>B cell<br>activation     | 8/926      | 28/17913      | 6.<br>09<br>E-<br>05 | 0.<br>00<br>06<br>75<br>56<br>9 | 0.000498587 | 55024/695/1493/2213/4332/64092/7128/7305                                                                                           | 8      |
| B<br>P | GO:20<br>00406 | positive<br>regulation of<br>T cell<br>migration      | 8/926      | 28/17913      | 6.<br>09<br>E-<br>05 | 0.<br>00<br>06<br>75<br>56<br>9 | 0.000498587 | 199/6364/6366/6352/729230/3627/10563/3676                                                                                          | 8      |
| B<br>P | GO:00<br>22408 | negative<br>regulation of<br>cell-cell<br>adhesion    | 22/92<br>6 | 169/1791<br>3 | 6.<br>13<br>E-<br>05 | 0.<br>00<br>06<br>78<br>57<br>1 | 0.000500803 | 84830/301/384/6366/29126/972/999/1493/2213/10457/8486<br>8/3620/3559/3718/3902/54900/10859/10288/80380/26191/9<br>750/11326        | 2<br>2 |
| B<br>P | GO:00<br>02437 | inflammator<br>y response<br>to antigenic<br>stimulus | 10/92<br>6 | 44/17913      | 6.<br>46<br>E-<br>05 | 0.<br>00<br>07<br>12<br>00<br>6 | 0.000525479 | 695/718/1236/940/923/2207/2213/3383/3559/10125                                                                                     | 1<br>0 |
| B<br>P | GO:00<br>10043 | response to<br>zinc ion                               | 10/92<br>6 | 44/17913      | 6.<br>46<br>E-<br>05 | 0.<br>00<br>07<br>12<br>00<br>6 | 0.000525479 | 1396/4489/4493/4499/4501/4502/5027/6279/7054/7412                                                                                  | 1<br>0 |
| B<br>P | GO:00<br>71241 | cellular<br>response to<br>inorganic<br>substance     | 24/92<br>6 | 194/1791<br>3 | 6.<br>63<br>E-<br>05 | 0.<br>00<br>07<br>29            | 0.000538221 | 107/113/84059/241/999/1536/1800/1906/3162/3725/120892/<br>4318/4489/4493/4499/4501/4502/653361/10891/10235/6331<br>/6622/7020/7054 | 2<br>4 |

|        |                |                                                                                       |            |               |                      |                                 |             |                                                                                                                                                                           |        |
|--------|----------------|---------------------------------------------------------------------------------------|------------|---------------|----------------------|---------------------------------|-------------|---------------------------------------------------------------------------------------------------------------------------------------------------------------------------|--------|
|        |                |                                                                                       |            |               |                      | 27<br>2                         |             |                                                                                                                                                                           |        |
| B<br>P | GO:00<br>90218 | positive<br>regulation of<br>lipid kinase<br>activity                                 | 9/926      | 36/17913      | 6.<br>74<br>E-<br>05 | 0.<br>00<br>07<br>38<br>13<br>4 | 0.000544762 | 6363/6366/1236/930/1917/2261/2322/2358/64127                                                                                                                              | 9      |
| B<br>P | GO:20<br>00516 | positive<br>regulation of<br>CD4-positiv<br>e,<br>alpha-beta T<br>cell<br>activation  | 9/926      | 36/17913      | 6.<br>74<br>E-<br>05 | 0.<br>00<br>07<br>38<br>13<br>4 | 0.000544762 | 301/6363/941/942/3594/3071/114548/5588/54440                                                                                                                              | 9      |
| B<br>P | GO:00<br>46330 | positive<br>regulation of<br>JNK<br>cascade                                           | 18/92<br>6 | 124/1791<br>3 | 6.<br>79<br>E-<br>05 | 0.<br>00<br>07<br>41<br>79<br>2 | 0.000547461 | 6363/6366/1236/939/1906/10595/2213/3553/11184/653361/<br>64127/10125/10371/6504/10333/8600/23043/9839                                                                     | 1<br>8 |
| B<br>P | GO:00<br>42130 | negative<br>regulation of<br>T cell<br>proliferation                                  | 11/92<br>6 | 53/17913      | 6.<br>86<br>E-<br>05 | 0.<br>00<br>07<br>47<br>43<br>9 | 0.00055163  | 384/29126/1493/10457/84868/3620/3559/10859/10288/8038<br>0/11326                                                                                                          | 1<br>1 |
| B<br>P | GO:00<br>43903 | regulation of<br>symbiosis,<br>encompassi<br>ng<br>mutualism<br>through<br>parasitism | 27/92<br>6 | 232/1791<br>3 | 6.<br>99<br>E-<br>05 | 0.<br>00<br>07<br>59<br>87<br>2 | 0.000560805 | 348/6348/6351/6352/940/948/972/3576/7852/2219/8091/342<br>8/3429/3434/8519/10581/10410/3394/3725/27074/4057/459<br>9/8638/5806/91543/11074/7538                           | 2<br>7 |
| B<br>P | GO:00<br>72503 | cellular<br>divalent<br>inorganic                                                     | 39/92<br>6 | 392/1791<br>3 | 7.<br>14<br>E-<br>07 | 0.<br>00<br>07                  | 0.000572059 | 348/719/6357/6363/6366/6348/6352/729230/1236/930/948/9<br>52/1043/57214/11151/3627/6373/10563/4283/1906/2099/29<br>03/2904/3792/3932/23566/931/5027/5031/5294/5579/5788/2 | 3<br>9 |

|        |                |                                                    |            |               |                      |                                 |             |                                                                                                          |        |
|--------|----------------|----------------------------------------------------|------------|---------------|----------------------|---------------------------------|-------------|----------------------------------------------------------------------------------------------------------|--------|
|        |                | cation homeostasis                                 |            |               | 05                   | 75                              |             | 2821/79608/6279/6556/6622/7052/9256                                                                      |        |
| B<br>P | GO:00<br>02645 | positive regulation of tolerance induction         | 5/926      | 10/17913      | 7.<br>40<br>E-<br>05 | 0.<br>00<br>07<br>96<br>49<br>7 | 0.000587835 | 29126/916/3620/11213/10288                                                                               | 5      |
| B<br>P | GO:00<br>70099 | regulation of chemokine-mediated signaling pathway | 5/926      | 10/17913      | 7.<br>40<br>E-<br>05 | 0.<br>00<br>07<br>96<br>49<br>7 | 0.000587835 | 6352/1906/11240/6091/54209                                                                               | 5      |
| B<br>P | GO:00<br>98883 | synapse pruning                                    | 5/926      | 10/17913      | 7.<br>40<br>E-<br>05 | 0.<br>00<br>07<br>96<br>49<br>7 | 0.000587835 | 712/713/714/718/3684                                                                                     | 5      |
| B<br>P | GO:20<br>00425 | regulation of apoptotic cell clearance             | 5/926      | 10/17913      | 7.<br>40<br>E-<br>05 | 0.<br>00<br>07<br>96<br>49<br>7 | 0.000587835 | 717/718/720/721/6347                                                                                     | 5      |
| B<br>P | GO:00<br>50770 | regulation of axonogenesis                         | 20/92<br>6 | 148/1791<br>3 | 7.<br>71<br>E-<br>05 | 0.<br>00<br>08<br>28<br>49<br>4 | 0.00061145  | 348/1630/2048/23105/3792/3897/23566/4038/4804/4897/9423/10439/5800/5979/6091/10371/6696/347733/7422/9839 | 2<br>0 |
| B<br>P | GO:00<br>35914 | skeletal muscle cell differentiation               | 12/92<br>6 | 63/17913      | 7.<br>88<br>E-<br>05 | 0.<br>00<br>08<br>44            | 0.000622973 | 467/50937/56603/1958/1959/8320/2817/59269/688/26471/5079/6899                                            | 1<br>2 |

|        |                |                                                        |            |               |                      |                                 |             |                                                                                                 |        |
|--------|----------------|--------------------------------------------------------|------------|---------------|----------------------|---------------------------------|-------------|-------------------------------------------------------------------------------------------------|--------|
|        |                |                                                        |            |               |                      | 10<br>7                         |             |                                                                                                 |        |
| B<br>P | GO:00<br>71675 | regulation of<br>mononuclear<br>cell<br>migration      | 10/92<br>6 | 45/17913      | 7.<br>93<br>E-<br>05 | 0.<br>00<br>08<br>47<br>64<br>8 | 0.000625586 | 199/719/728/6352/729230/3627/1843/2358/7941/56833                                               | 1<br>0 |
| B<br>P | GO:19<br>01216 | positive<br>regulation of<br>neuron<br>death           | 15/92<br>6 | 93/17913      | 7.<br>99<br>E-<br>05 | 0.<br>00<br>08<br>52<br>71      | 0.000629322 | 712/6348/1958/2213/2904/3684/3689/3725/8564/26471/506<br>3/6622/7020/10333/7305                 | 1<br>5 |
| B<br>P | GO:00<br>06636 | unsaturated<br>fatty acid<br>biosynthetic<br>process   | 11/92<br>6 | 54/17913      | 8.<br>21<br>E-<br>05 | 0.<br>00<br>08<br>72<br>78      | 0.000644134 | 241/972/8560/1906/6785/2171/3553/5730/5742/79966/6916                                           | 1<br>1 |
| B<br>P | GO:19<br>04645 | response to<br>amyloid-beta                            | 11/92<br>6 | 54/17913      | 8.<br>21<br>E-<br>05 | 0.<br>00<br>08<br>72<br>78      | 0.000644134 | 948/2213/2358/3383/3676/4321/4318/4804/10333/54209/74<br>12                                     | 1<br>1 |
| B<br>P | GO:00<br>31342 | negative<br>regulation of<br>cell killing              | 7/926      | 22/17913      | 8.<br>29<br>E-<br>05 | 0.<br>00<br>08<br>79<br>62<br>3 | 0.000649185 | 2213/84868/3134/3575/10859/5788/5272                                                            | 7      |
| B<br>P | GO:00<br>97553 | calcium ion<br>transmembrane<br>import<br>into cytosol | 18/92<br>6 | 126/1791<br>3 | 8.<br>40<br>E-<br>05 | 0.<br>00<br>08<br>88<br>72<br>1 | 0.000655899 | 6363/6366/6348/1236/930/57214/11151/3627/6373/4283/29<br>03/2904/3932/5027/5031/5788/22821/6622 | 1<br>8 |
| B      | GO:00          | positive                                               | 20/92      | 149/1791      | 8.                   | 0.                              | 0.000661435 | 9447/695/948/3304/3383/3553/3556/11213/3689/4057/1145                                           | 2      |

|        |                |                                                       |            |               |                      |                                 |             |                                                                                                                                                                                                                               |        |
|--------|----------------|-------------------------------------------------------|------------|---------------|----------------------|---------------------------------|-------------|-------------------------------------------------------------------------------------------------------------------------------------------------------------------------------------------------------------------------------|--------|
| P      | 51092          | regulation of NF-kappaB transcription factor activity | 6          | 3             | 49<br>E-<br>05       | 00<br>08<br>96<br>22<br>3       |             | 48/64127/5579/5588/54101/6279/7097/10333/8600/10346                                                                                                                                                                           | 0      |
| B<br>P | GO:00<br>70613 | regulation of protein processing                      | 22/92<br>6 | 173/1791<br>3 | 8.<br>73<br>E-<br>05 | 0.<br>00<br>09<br>18<br>20<br>1 | 0.000677656 | 712/713/714/717/718/719/720/721/728/730/147372/930/629/3426/1378/1380/3553/7850/120892/710/55061/11326                                                                                                                        | 2<br>2 |
| B<br>P | GO:19<br>03034 | regulation of response to wounding                    | 22/92<br>6 | 173/1791<br>3 | 8.<br>73<br>E-<br>05 | 0.<br>00<br>09<br>18<br>20<br>1 | 0.000677656 | 150/84830/301/348/135228/948/7852/1906/83481/2152/2811/1839/5329/5341/5588/56963/6403/710/89790/6696/7035/7128                                                                                                                | 2<br>2 |
| B<br>P | GO:00<br>60191 | regulation of lipase activity                         | 15/92<br>6 | 94/17913      | 9.<br>06<br>E-<br>05 | 0.<br>00<br>09<br>50<br>91<br>8 | 0.000701802 | 653145/341/728/6352/2099/2261/9734/3702/4023/5031/5330/5997/6401/6622/7294                                                                                                                                                    | 1<br>5 |
| B<br>P | GO:00<br>06875 | cellular metal ion homeostasis                        | 44/92<br>6 | 467/1791<br>3 | 9.<br>10<br>E-<br>05 | 0.<br>00<br>09<br>52<br>66<br>9 | 0.000703094 | 348/719/730/6357/6363/6366/6348/6352/729230/1236/930/948/952/1043/57214/11151/3627/6373/10563/4283/1906/2099/2903/2904/3162/3792/3932/23566/4057/931/4502/5027/5031/5294/5579/5788/22821/79608/6279/6556/6622/7052/64699/9256 | 4<br>4 |
| B<br>P | GO:00<br>50678 | regulation of epithelial cell proliferation           | 37/92<br>6 | 369/1791<br>3 | 9.<br>24<br>E-<br>05 | 0.<br>00<br>09<br>65<br>24<br>7 | 0.000712377 | 10000/8862/348/374/728/6347/6352/135228/1021/1749/1960/83481/2069/2152/3162/3676/120425/3725/4321/4781/4804/197358/64127/3164/8013/26471/5365/26051/6091/6331/5268/6662/6899/7128/8626/7422/7538                              | 3<br>7 |
| B<br>P | GO:00<br>50673 | epithelial cell                                       | 41/92<br>6 | 425/1791<br>3 | 9.<br>36             | 0.<br>00                        | 0.000720129 | 10000/8862/348/374/728/6347/6352/135228/1021/1749/1960/83481/2069/2099/2152/55612/3162/3664/3676/120425/37                                                                                                                    | 4<br>1 |

|        |                |                                                                     |        |           |        |             |             |                                                                                                                                                             |    |
|--------|----------------|---------------------------------------------------------------------|--------|-----------|--------|-------------|-------------|-------------------------------------------------------------------------------------------------------------------------------------------------------------|----|
|        |                | proliferation                                                       |        |           | E-05   | 0975751     |             | 25/4321/4781/4804/197358/64127/3164/8013/26471/5365/26051/6091/6331/5268/6662/6899/7128/8600/8626/7422/7538                                                 |    |
| B<br>P | GO:20<br>01057 | reactive nitrogen species metabolic process                         | 14/926 | 84/17913  | 9.5205 | 0.000731093 | 0.000731093 | 54/199/384/948/1906/3383/3553/3689/64757/9722/5806/140885/7097/10333                                                                                        | 14 |
| B<br>P | GO:00<br>21675 | nerve development                                                   | 13/926 | 74/17913  | 9.6305 | 0.000737806 | 0.000737806 | 1959/2048/3213/3676/26018/89797/5979/10371/6507/84189/6899/7020/7412                                                                                        | 13 |
| B<br>P | GO:00<br>32757 | positive regulation of interleukin-8 production                     | 10/926 | 46/17913  | 9.6605 | 0.000737806 | 0.000737806 | 929/914/2219/3304/3553/64127/7096/7097/51284/51311                                                                                                          | 10 |
| B<br>P | GO:19<br>00015 | regulation of cytokine production involved in inflammatory response | 10/926 | 46/17913  | 9.6605 | 0.000737806 | 0.000737806 | 113/923/115362/7850/4210/197358/64127/5187/140885/10333                                                                                                     | 10 |
| B<br>P | GO:00<br>51480 | regulation of cytosolic calcium ion concentration                   | 31/926 | 289/17913 | 9.9305 | 0.000755642 | 0.000755642 | 719/6363/6366/6348/1236/930/948/952/1043/57214/11151/3627/6373/10563/4283/1906/2099/2903/2904/3932/23566/931/5027/5031/5294/5788/22821/79608/6622/7052/9256 | 31 |
| B<br>P | GO:00<br>50679 | positive regulation of epithelial cell                              | 24/926 | 199/17913 | 9.9405 | 0.000755642 | 0.000755642 | 10000/8862/374/728/6352/1749/1960/2152/3162/3676/120425/3725/4321/64127/3164/8013/5365/26051/6331/6662/6899/7128/8626/7422                                  | 24 |

|        |                |                                                                                       |            |               |                                 |                                 |             |                                                                                                                                                            |        |
|--------|----------------|---------------------------------------------------------------------------------------|------------|---------------|---------------------------------|---------------------------------|-------------|------------------------------------------------------------------------------------------------------------------------------------------------------------|--------|
|        |                | proliferation                                                                         |            |               |                                 | 87                              |             |                                                                                                                                                            |        |
| B<br>P | GO:00<br>43406 | positive<br>regulation of<br>MAP kinase<br>activity                                   | 28/92<br>6 | 250/1791<br>3 | 0.<br>00<br>01<br>01<br>41<br>3 | 0.<br>00<br>10<br>42<br>72<br>2 | 0.000769556 | 150/728/6363/972/7852/1906/10595/2322/2357/3553/23566/<br>120892/11184/64127/3084/5027/5063/5294/23533/5788/101<br>25/5979/6091/10333/8600/23043/7422/9839 | 2<br>8 |
| B<br>P | GO:00<br>02576 | platelet<br>degranulation                                                             | 18/92<br>6 | 128/1791<br>3 | 0.<br>00<br>01<br>03<br>32<br>8 | 0.<br>00<br>10<br>58<br>12      | 0.00078092  | 135228/948/1521/2207/83706/3481/22915/5341/440915/587<br>4/6414/6403/5265/710/5552/6812/7273/7422                                                          | 1<br>8 |
| B<br>P | GO:00<br>07498 | mesoderm<br>development                                                               | 18/92<br>6 | 128/1791<br>3 | 0.<br>00<br>01<br>03<br>32<br>8 | 0.<br>00<br>10<br>58<br>12      | 0.00078092  | 655/660/695/8320/3055/8091/10320/22806/3675/3691/8013/<br>5017/27330/6398/6899/8463/8626/7422                                                              | 1<br>8 |
| B<br>P | GO:19<br>03317 | regulation of<br>protein<br>maturation                                                | 22/92<br>6 | 175/1791<br>3 | 0.<br>00<br>01<br>03<br>66<br>8 | 0.<br>00<br>10<br>59<br>45<br>8 | 0.000781908 | 712/713/714/717/718/719/720/721/728/730/147372/930/629/<br>3426/1378/1380/3553/7850/120892/710/55061/11326                                                 | 2<br>2 |
| B<br>P | GO:00<br>43372 | positive<br>regulation of<br>CD4-positive,<br>alpha-beta T<br>cell<br>differentiation | 8/926      | 30/17913      | 0.<br>00<br>01<br>04<br>6       | 0.<br>00<br>10<br>62<br>55<br>9 | 0.000784196 | 301/6363/941/942/3594/3071/114548/54440                                                                                                                    | 8      |
| B<br>P | GO:00<br>46633 | alpha-beta T<br>cell<br>proliferation                                                 | 8/926      | 30/17913      | 0.<br>00<br>01<br>04            | 0.<br>00<br>10<br>62            | 0.000784196 | 384/729230/29126/940/916/1794/5788/7535                                                                                                                    | 8      |

|        |                |                                                                 |            |               |                                 |                                 |             |                                                                                                                                                                                                                                                        |        |
|--------|----------------|-----------------------------------------------------------------|------------|---------------|---------------------------------|---------------------------------|-------------|--------------------------------------------------------------------------------------------------------------------------------------------------------------------------------------------------------------------------------------------------------|--------|
|        |                |                                                                 |            |               | 6                               | 55                              |             |                                                                                                                                                                                                                                                        |        |
|        |                |                                                                 |            |               |                                 | 9                               |             |                                                                                                                                                                                                                                                        |        |
| B<br>P | GO:00<br>61082 | myeloid<br>leukocyte<br>cytokine<br>production                  | 8/926      | 30/17913      | 0.<br>00<br>01<br>04<br>6       | 0.<br>00<br>10<br>62<br>55<br>9 | 0.000784196 | 948/972/2207/51704/3162/11213/10859/8013                                                                                                                                                                                                               | 8      |
| B<br>P | GO:00<br>02707 | negative<br>regulation of<br>lymphocyte<br>mediated<br>immunity | 9/926      | 38/17913      | 0.<br>00<br>01<br>06<br>36<br>5 | 0.<br>00<br>10<br>74<br>54<br>7 | 0.000793043 | 10225/1378/2213/84868/3134/3575/10859/5788/5272                                                                                                                                                                                                        | 9      |
| B<br>P | GO:00<br>02711 | positive<br>regulation of<br>T cell<br>mediated<br>immunity     | 9/926      | 38/17913      | 0.<br>00<br>01<br>06<br>36<br>5 | 0.<br>00<br>10<br>74<br>54<br>7 | 0.000793043 | 3134/3594/3553/3569/114548/5027/5788/91543/54440                                                                                                                                                                                                       | 9      |
| B<br>P | GO:00<br>09636 | response to<br>toxic<br>substance                               | 46/92<br>6 | 499/1791<br>3 | 0.<br>00<br>01<br>06<br>41<br>6 | 0.<br>00<br>10<br>74<br>54<br>7 | 0.000793043 | 100/113/241/348/374/655/6348/6351/6352/929/939/948/999/<br>1536/1843/1906/1958/2903/2904/9734/3162/3359/3383/356<br>9/3725/3775/120892/4129/64757/4929/8013/26471/10891/5<br>5607/5742/26575/5997/6279/140885/6648/6688/7054/7097/<br>7128/140803/7412 | 4<br>6 |
| B<br>P | GO:00<br>06801 | superoxide<br>metabolic<br>process                              | 12/92<br>6 | 65/17913      | 0.<br>00<br>01<br>08<br>11<br>1 | 0.<br>00<br>10<br>89<br>49<br>7 | 0.000804077 | 54/655/948/1536/1906/2358/3684/3689/653361/4688/6648/7<br>305                                                                                                                                                                                          | 1<br>2 |
| B<br>P | GO:00<br>42475 | odontogene<br>sis of<br>dentin-conta<br>ining tooth             | 14/92<br>6 | 85/17913      | 0.<br>00<br>01<br>08<br>60      | 0.<br>00<br>10<br>90<br>12      | 0.000804542 | 655/1441/54757/3691/4038/5818/152816/64065/860/6331/6<br>899/4982/8626/256764                                                                                                                                                                          | 1<br>4 |



|        |                |                                                                              |            |               |                                 |                                 |             |                                                                                                                                                          |        |
|--------|----------------|------------------------------------------------------------------------------|------------|---------------|---------------------------------|---------------------------------|-------------|----------------------------------------------------------------------------------------------------------------------------------------------------------|--------|
|        |                |                                                                              |            |               | 4                               | 7                               |             |                                                                                                                                                          |        |
| B<br>P | GO:19<br>03901 | negative<br>regulation of<br>viral life<br>cycle                             | 14/92<br>6 | 85/17913      | 0.<br>00<br>01<br>08<br>60<br>4 | 0.<br>00<br>10<br>90<br>12<br>7 | 0.000804542 | 6352/2219/8091/3428/3434/8519/10581/10410/4057/4599/8<br>638/5806/91543/11074                                                                            | 1<br>4 |
| B<br>P | GO:19<br>01224 | positive<br>regulation of<br>NIK/NF-kap<br>paB<br>signaling                  | 13/92<br>6 | 75/17913      | 0.<br>00<br>01<br>11<br>05<br>5 | 0.<br>00<br>11<br>12<br>52<br>7 | 0.000821074 | 6363/929/939/11116/1906/84868/3553/64127/4306/7097/103<br>33/51284/54209                                                                                 | 1<br>3 |
| B<br>P | GO:00<br>32703 | negative<br>regulation of<br>interleukin-2<br>production                     | 7/926      | 23/17913      | 0.<br>00<br>01<br>13<br>94<br>2 | 0.<br>00<br>11<br>39<br>19<br>2 | 0.000840753 | 2633/84868/3902/5788/7128/11326/7538                                                                                                                     | 7      |
| B<br>P | GO:00<br>51588 | regulation of<br>neurotrans<br>mitter<br>transport                           | 18/92<br>6 | 129/1791<br>3 | 0.<br>00<br>01<br>14<br>39<br>7 | 0.<br>00<br>11<br>41<br>48<br>9 | 0.000842449 | 107/321/8862/8938/8564/10859/120892/4129/79772/5027/5<br>5607/5579/5997/6622/9627/6812/91683/8600                                                        | 1<br>8 |
| B<br>P | GO:00<br>31334 | positive<br>regulation of<br>protein<br>complex<br>assembly                  | 27/92<br>6 | 239/1791<br>3 | 0.<br>00<br>01<br>15<br>88<br>5 | 0.<br>00<br>11<br>54<br>07<br>4 | 0.000851736 | 9447/274/146206/6366/1236/948/11151/10563/2099/342184<br>/115362/3055/3304/3383/10788/3512/3725/3936/4478/3071/<br>4868/5341/10333/129293/7422/7453/7454 | 2<br>7 |
| B<br>P | GO:00<br>43370 | regulation of<br>CD4-positiv<br>e,<br>alpha-beta T<br>cell<br>differentiatio | 10/92<br>6 | 47/17913      | 0.<br>00<br>01<br>17<br>13      | 0.<br>00<br>11<br>61<br>90<br>2 | 0.000857513 | 301/6363/941/942/3594/3662/3718/3071/114548/54440                                                                                                        | 1<br>0 |

|        |                | n                                                                    |            |           |                                 |                                 |             |                                                                                                                                                                                           |        |
|--------|----------------|----------------------------------------------------------------------|------------|-----------|---------------------------------|---------------------------------|-------------|-------------------------------------------------------------------------------------------------------------------------------------------------------------------------------------------|--------|
| B<br>P | GO:00<br>46638 | positive<br>regulation of<br>alpha-beta T<br>cell<br>differentiation | 10/92<br>6 | 47/17913  | 0.<br>00<br>01<br>17<br>13      | 0.<br>00<br>11<br>61<br>90<br>2 | 0.000857513 | 100/301/6363/941/942/3594/3071/114548/54440/7535                                                                                                                                          | 1<br>0 |
| B<br>P | GO:00<br>61097 | regulation of<br>protein<br>tyrosine<br>kinase<br>activity           | 14/92<br>6 | 86/17913  | 0.<br>00<br>01<br>23<br>65<br>1 | 0.<br>00<br>12<br>24<br>18<br>9 | 0.000903483 | 150/389658/6352/1436/2069/2209/51704/353514/653361/3084/5788/5649/80725/26228                                                                                                             | 1<br>4 |
| B<br>P | GO:00<br>10517 | regulation of<br>phospholipase<br>activity                           | 12/92<br>6 | 66/17913  | 0.<br>00<br>01<br>26<br>00<br>7 | 0.<br>00<br>12<br>45<br>08<br>5 | 0.000918905 | 653145/728/6352/2099/2261/3702/5031/5330/5997/6401/6622/7294                                                                                                                              | 1<br>2 |
| B<br>P | GO:00<br>06874 | cellular<br>calcium ion<br>homeostasis                               | 37/92<br>6 | 375/17913 | 0.<br>00<br>01<br>28<br>54<br>1 | 0.<br>00<br>12<br>67<br>65<br>7 | 0.000935563 | 348/719/6357/6363/6366/6348/6352/729230/1236/930/948/952/1043/57214/11151/3627/6373/10563/4283/1906/2099/2903/2904/3792/3932/23566/931/5027/5031/5294/5579/5788/2821/79608/6622/7052/9256 | 3<br>7 |
| B<br>P | GO:00<br>33089 | positive<br>regulation of<br>T cell<br>differentiation<br>in thymus  | 5/926      | 11/17913  | 0.<br>00<br>01<br>29<br>90<br>4 | 0.<br>00<br>12<br>73<br>66<br>2 | 0.000939995 | 100/1960/3575/10125/9840                                                                                                                                                                  | 5      |
| B<br>P | GO:00<br>45059 | positive<br>thymic T cell<br>selection                               | 5/926      | 11/17913  | 0.<br>00<br>01<br>29<br>90<br>4 | 0.<br>00<br>12<br>73<br>66<br>2 | 0.000939995 | 915/972/1794/5788/7535                                                                                                                                                                    | 5      |

|        |                |                                                                     |            |               |                                 |                                 |             |                                                                                                   |        |
|--------|----------------|---------------------------------------------------------------------|------------|---------------|---------------------------------|---------------------------------|-------------|---------------------------------------------------------------------------------------------------|--------|
| B<br>P | GO:00<br>72610 | interleukin-1<br>2 secretion                                        | 5/926      | 11/17913      | 0.<br>00<br>01<br>29<br>90<br>4 | 0.<br>00<br>12<br>73<br>66<br>2 | 0.000939995 | 6363/1236/353514/10859/51311                                                                      | 5      |
| B<br>P | GO:00<br>51928 | positive<br>regulation of<br>calcium ion<br>transport               | 17/92<br>6 | 119/1791<br>3 | 0.<br>00<br>01<br>31<br>00<br>2 | 0.<br>00<br>12<br>81<br>94<br>6 | 0.000946109 | 9914/6347/6348/6351/6352/930/57214/3627/6373/4283/353<br>514/23566/5027/5031/6622/6769/342667     | 1<br>7 |
| B<br>P | GO:00<br>42269 | regulation of<br>natural killer<br>cell<br>mediated<br>cytotoxicity | 9/926      | 39/17913      | 0.<br>00<br>01<br>31<br>99<br>1 | 0.<br>00<br>12<br>89<br>13<br>8 | 0.000951417 | 84868/3134/3902/10859/10125/5272/4068/114836/7409                                                 | 9      |
| B<br>P | GO:00<br>45920 | negative<br>regulation of<br>exocytosis                             | 8/926      | 31/17913      | 0.<br>00<br>01<br>34<br>64<br>2 | 0.<br>00<br>13<br>12<br>5       | 0.000968659 | 150/301/729230/8832/2213/3134/3162/6622                                                           | 8      |
| B<br>P | GO:00<br>61041 | regulation of<br>wound<br>healing                                   | 19/92<br>6 | 143/1791<br>3 | 0.<br>00<br>01<br>44<br>99<br>2 | 0.<br>00<br>14<br>10<br>68<br>5 | 0.001041122 | 150/84830/301/348/135228/948/7852/1906/83481/2152/281<br>1/1839/5329/5341/5588/6403/710/7035/7128 | 1<br>9 |
| B<br>P | GO:00<br>50918 | positive<br>chemotaxis                                              | 12/92<br>6 | 67/17913      | 0.<br>00<br>01<br>46<br>38<br>2 | 0.<br>00<br>14<br>21<br>40<br>4 | 0.001049033 | 6348/6352/1233/11151/3627/3576/2152/2358/10457/3603/5<br>365/7422                                 | 1<br>2 |
| B      | GO:00          | immunoglob                                                          | 15/92      | 98/17913      | 0.                              | 0.                              | 0.001049033 | 695/933/940/2213/115352/10875/3119/90865/3569/3575/94                                             | 1      |

|        |                |                                                               |            |          |                                 |                                 |             |                                                                              |        |
|--------|----------------|---------------------------------------------------------------|------------|----------|---------------------------------|---------------------------------|-------------|------------------------------------------------------------------------------|--------|
| P      | 02377          | ulin production                                               | 6          |          | 00<br>01<br>46<br>93<br>5       | 00<br>14<br>21<br>40<br>4       |             | 52/54900/51237/5788/10673                                                    | 5      |
| B<br>P | GO:00<br>42136 | neurotransmitter biosynthetic process                         | 15/92<br>6 | 98/17913 | 0.<br>00<br>01<br>46<br>93<br>5 | 0.<br>00<br>14<br>21<br>40<br>4 | 0.001049033 | 54/199/384/948/1806/1906/3383/3553/3689/9722/5806/1408<br>85/6507/7054/10333 | 1<br>5 |
| B<br>P | GO:00<br>01914 | regulation of T cell mediated cytotoxicity                    | 7/926      | 24/17913 | 0.<br>00<br>01<br>53<br>72<br>1 | 0.<br>00<br>14<br>84<br>21<br>4 | 0.001095388 | 2213/3134/3594/3575/10859/5027/5788                                          | 7      |
| B<br>P | GO:19<br>05954 | positive regulation of lipid localization                     | 13/92<br>6 | 78/17913 | 0.<br>00<br>01<br>67<br>62<br>6 | 0.<br>00<br>16<br>15<br>39<br>2 | 0.001192201 | 5244/348/10396/718/948/1906/29923/3553/4023/4481/5027/<br>6696/8600          | 1<br>3 |
| B<br>P | GO:19<br>03793 | positive regulation of anion transport                        | 10/92<br>6 | 49/17913 | 0.<br>00<br>01<br>69<br>25<br>5 | 0.<br>00<br>16<br>27<br>99<br>8 | 0.001201504 | 5243/5244/348/10396/1906/3553/8564/5027/6812/8600                            | 1<br>0 |
| B<br>P | GO:00<br>43552 | positive regulation of phosphatidylinositol 3-kinase activity | 8/926      | 32/17913 | 0.<br>00<br>01<br>71<br>45<br>4 | 0.<br>00<br>16<br>42<br>91<br>4 | 0.001212513 | 6363/6366/1236/930/2261/2322/2358/64127                                      | 8      |
| B<br>P | GO:00<br>71276 | cellular response to                                          | 8/926      | 32/17913 | 0.<br>00                        | 0.<br>00                        | 0.001212513 | 1536/3162/3725/4318/4489/4493/4501/653361                                    | 8      |

|        |                |                                                         |            |               |                                 |                                 |             |                                                                                                                                                       |        |
|--------|----------------|---------------------------------------------------------|------------|---------------|---------------------------------|---------------------------------|-------------|-------------------------------------------------------------------------------------------------------------------------------------------------------|--------|
|        |                | cadmium ion                                             |            |               | 01<br>71<br>45<br>4             | 16<br>42<br>91<br>4             |             |                                                                                                                                                       |        |
| B<br>P | GO:00<br>46328 | regulation of JNK cascade                               | 21/92<br>6 | 169/1791<br>3 | 0.<br>00<br>01<br>74<br>06<br>8 | 0.<br>00<br>16<br>64<br>81<br>5 | 0.001228676 | 6363/6366/1236/939/1906/10595/2213/3553/11184/653361/64127/5187/26191/10125/10371/140885/6504/10333/8600/23043/9839                                   | 2<br>1 |
| B<br>P | GO:00<br>60402 | calcium ion transport into cytosol                      | 19/92<br>6 | 145/1791<br>3 | 0.<br>00<br>01<br>74<br>41<br>8 | 0.<br>00<br>16<br>65<br>02      | 0.001228828 | 6363/6366/6348/1236/930/57214/11151/3627/6373/4283/2903/2904/3932/931/5027/5031/5788/22821/6622                                                       | 1<br>9 |
| B<br>P | GO:00<br>45071 | negative regulation of viral genome replication         | 11/92<br>6 | 59/17913      | 0.<br>00<br>01<br>89<br>63<br>6 | 0.<br>00<br>18<br>06<br>88<br>7 | 0.001333529 | 6352/8091/3428/3434/8519/10581/10410/4057/4599/8638/91543                                                                                             | 1<br>1 |
| B<br>P | GO:00<br>99173 | postsynapse organization                                | 20/92<br>6 | 158/1791<br>3 | 0.<br>00<br>01<br>91<br>55      | 0.<br>00<br>18<br>21<br>69<br>8 | 0.00134446  | 348/22866/55619/2048/2213/2904/3556/9118/3675/10288/4038/120892/10397/4744/9722/4897/5063/55607/5649/80725                                            | 2<br>0 |
| B<br>P | GO:00<br>32720 | negative regulation of tumor necrosis factor production | 12/92<br>6 | 69/17913      | 0.<br>00<br>01<br>95<br>68<br>9 | 0.<br>00<br>18<br>57<br>57<br>5 | 0.001370938 | 54/384/10457/84868/11213/10859/197358/26191/140885/6504/7128/54209                                                                                    | 1<br>2 |
| B<br>P | GO:00<br>10769 | regulation of cell morphogen                            | 28/92<br>6 | 260/1791<br>3 | 0.<br>00<br>01                  | 0.<br>00<br>18                  | 0.001384121 | 348/1630/2048/23105/2633/3792/3897/23566/4038/120892/4804/4897/9423/10439/5063/55607/5800/5649/5979/6091/6281/10371/6696/80725/23043/347733/7422/9839 | 2<br>8 |

|        |            |                                                          |        |           |             |             |             |                                                                                                                                                                     |    |
|--------|------------|----------------------------------------------------------|--------|-----------|-------------|-------------|-------------|---------------------------------------------------------------------------------------------------------------------------------------------------------------------|----|
|        |            | esis involved in differentiation                         |        |           | 9794        | 75438       |             |                                                                                                                                                                     |    |
| B<br>P | GO:2000404 | regulation of T cell migration                           | 9/926  | 41/17913  | 0.0001848   | 0.0001859   | 0.001387871 | 199/6364/6366/6352/729230/3627/10563/3676/9750                                                                                                                      | 9  |
| B<br>P | GO:0046677 | response to antibiotic                                   | 33/926 | 328/17913 | 0.000203785 | 0.000192063 | 0.001417056 | 100/107/113/249/374/1233/929/939/4261/1396/1536/1843/1906/1958/2903/2904/3162/3359/3383/3569/3725/120892/4129/8013/5997/6279/140885/6507/375611/6688/7054/7128/7412 | 33 |
| B<br>P | GO:0090026 | positive regulation of monocyte chemotaxis               | 6/926  | 18/17913  | 0.000203786 | 0.000192063 | 0.001417056 | 199/6352/729230/3627/2358/7941                                                                                                                                      | 6  |
| B<br>P | GO:0051209 | release of sequestered calcium ion into cytosol          | 16/926 | 112/17913 | 0.00020456  | 0.00019214  | 0.001417168 | 6363/6366/6348/1236/930/57214/11151/3627/6373/4283/3932/5027/5031/5788/22821/6622                                                                                   | 16 |
| B<br>P | GO:0051283 | negative regulation of sequestering of calcium ion       | 16/926 | 112/17913 | 0.00020456  | 0.00019214  | 0.001417168 | 6363/6366/6348/1236/930/57214/11151/3627/6373/4283/3932/5027/5031/5788/22821/6622                                                                                   | 16 |
| B<br>P | GO:2001056 | positive regulation of cysteine-tyrosine phosphorylation | 18/926 | 135/17913 | 0.000202    | 0.00019     | 0.001420393 | 9447/1285/26999/112399/2152/355/2903/2904/3428/3932/4210/4804/22861/114548/64065/6091/6279/6622                                                                     | 18 |

|        |                |                                                                                    |            |               |                                 |                                 |             |                                                                                                                                                                                                                                                      |        |
|--------|----------------|------------------------------------------------------------------------------------|------------|---------------|---------------------------------|---------------------------------|-------------|------------------------------------------------------------------------------------------------------------------------------------------------------------------------------------------------------------------------------------------------------|--------|
|        |                | e<br>endopeptida<br>se activity                                                    |            |               | 05<br>40<br>5                   | 24<br>58<br>5                   |             |                                                                                                                                                                                                                                                      |        |
| B<br>P | GO:00<br>50878 | regulation of<br>body fluid<br>levels                                              | 45/92<br>6 | 499/1791<br>3 | 0.<br>00<br>02<br>07<br>30<br>7 | 0.<br>00<br>19<br>38<br>81<br>8 | 0.001430898 | 100/107/113/150/84830/653145/8862/348/948/56603/13918<br>9/139818/1906/2048/2152/2207/83706/2811/8356/3099/356<br>9/3932/3937/22915/4939/5027/5029/5294/23533/5329/5341/<br>5577/5579/5588/5800/6403/5265/710/6812/7035/7980/8626/<br>7409/7422/7454 | 4<br>5 |
| B<br>P | GO:19<br>03900 | regulation of<br>viral life<br>cycle                                               | 19/92<br>6 | 147/1791<br>3 | 0.<br>00<br>02<br>08<br>95<br>9 | 0.<br>00<br>19<br>50<br>66<br>8 | 0.001439644 | 6352/940/972/3576/2219/8091/3428/3429/3434/8519/10581/<br>10410/27074/4057/4599/8638/5806/91543/11074                                                                                                                                                | 1<br>9 |
| B<br>P | GO:00<br>02517 | T cell<br>tolerance<br>induction                                                   | 5/926      | 12/17913      | 0.<br>00<br>02<br>13<br>22<br>1 | 0.<br>00<br>19<br>61<br>55<br>2 | 0.001447676 | 916/29851/3620/3559/10288                                                                                                                                                                                                                            | 5      |
| B<br>P | GO:00<br>02863 | positive<br>regulation of<br>inflammator<br>y response<br>to antigenic<br>stimulus | 5/926      | 12/17913      | 0.<br>00<br>02<br>13<br>22<br>1 | 0.<br>00<br>19<br>61<br>55<br>2 | 0.001447676 | 695/718/1236/940/2207                                                                                                                                                                                                                                | 5      |
| B<br>P | GO:00<br>43301 | negative<br>regulation of<br>leukocyte<br>degranulatio<br>n                        | 5/926      | 12/17913      | 0.<br>00<br>02<br>13<br>22<br>1 | 0.<br>00<br>19<br>61<br>55<br>2 | 0.001447676 | 729230/8832/2213/3134/3162                                                                                                                                                                                                                           | 5      |
| B<br>P | GO:00<br>43922 | negative<br>regulation<br>by host of<br>viral                                      | 5/926      | 12/17913      | 0.<br>00<br>02<br>13            | 0.<br>00<br>19<br>61            | 0.001447676 | 6348/6351/6352/8091/3725                                                                                                                                                                                                                             | 5      |

|        |                |                                                                       |            |          |                                 |                                 |             |                                                    |        |
|--------|----------------|-----------------------------------------------------------------------|------------|----------|---------------------------------|---------------------------------|-------------|----------------------------------------------------|--------|
|        |                | transcription                                                         |            |          | 22<br>1                         | 55<br>2                         |             |                                                    |        |
| B<br>P | GO:00<br>45410 | positive<br>regulation of<br>interleukin-6<br>biosynthetic<br>process | 5/926      | 12/17913 | 0.<br>00<br>02<br>13<br>22<br>1 | 0.<br>00<br>19<br>61<br>55<br>2 | 0.001447676 | 2069/3553/7096/10333/7305                          | 5      |
| B<br>P | GO:00<br>45779 | negative<br>regulation of<br>bone<br>resorption                       | 5/926      | 12/17913 | 0.<br>00<br>02<br>13<br>22<br>1 | 0.<br>00<br>19<br>61<br>55<br>2 | 0.001447676 | 952/3569/5027/7128/4982                            | 5      |
| B<br>P | GO:00<br>72540 | T-helper 17<br>cell lineage<br>commitment                             | 5/926      | 12/17913 | 0.<br>00<br>02<br>13<br>22<br>1 | 0.<br>00<br>19<br>61<br>55<br>2 | 0.001447676 | 3594/3569/3662/4063/114836                         | 5      |
| B<br>P | GO:20<br>01198 | regulation of<br>dendritic cell<br>differentiation                    | 5/926      | 12/17913 | 0.<br>00<br>02<br>13<br>22<br>1 | 0.<br>00<br>19<br>61<br>55<br>2 | 0.001447676 | 2213/10859/10288/55365/28959                       | 5      |
| B<br>P | GO:00<br>01913 | T cell<br>mediated<br>cytotoxicity                                    | 8/926      | 33/17913 | 0.<br>00<br>02<br>16<br>15<br>5 | 0.<br>00<br>19<br>84<br>94<br>4 | 0.00146494  | 2213/3134/3594/3575/10859/5027/5551/5788           | 8      |
| B<br>P | GO:00<br>97366 | response to<br>bronchodilat<br>or                                     | 10/92<br>6 | 51/17913 | 0.<br>00<br>02<br>39<br>64      | 0.<br>00<br>21<br>96<br>65      | 0.001621186 | 6363/1236/1800/2903/9734/3383/4929/26575/5997/7054 | 1<br>0 |



|        |                |                                                                      |            |               |                                 |                                 |             |                                                                                                                                                                                        |        |
|--------|----------------|----------------------------------------------------------------------|------------|---------------|---------------------------------|---------------------------------|-------------|----------------------------------------------------------------------------------------------------------------------------------------------------------------------------------------|--------|
|        |                |                                                                      |            |               | 3                               | 3                               |             |                                                                                                                                                                                        |        |
| B<br>P | GO:00<br>07596 | blood<br>coagulation                                                 | 33/92<br>6 | 331/1791<br>3 | 0.<br>00<br>02<br>41<br>05<br>9 | 0.<br>00<br>22<br>02<br>63<br>4 | 0.001625601 | 150/84830/653145/348/948/139189/139818/1906/2152/2207<br>/83706/2811/8356/3569/3932/3937/22915/5027/5294/23533/<br>5329/5341/5577/5579/5588/6403/5265/710/6812/7035/7980/<br>7409/7454 | 3<br>3 |
| B<br>P | GO:00<br>45429 | positive<br>regulation of<br>nitric oxide<br>biosynthetic<br>process | 9/926      | 42/17913      | 0.<br>00<br>02<br>41<br>59<br>9 | 0.<br>00<br>22<br>02<br>63<br>4 | 0.001625601 | 199/948/1906/3383/3553/3689/9722/5806/10333                                                                                                                                            | 9      |
| B<br>P | GO:19<br>00271 | regulation of<br>long-term<br>synaptic<br>potentiation               | 9/926      | 42/17913      | 0.<br>00<br>02<br>41<br>59<br>9 | 0.<br>00<br>22<br>02<br>63<br>4 | 0.001625601 | 107/348/2048/2903/10288/27065/55607/5649/7305                                                                                                                                          | 9      |
| B<br>P | GO:00<br>46209 | nitric oxide<br>metabolic<br>process                                 | 13/92<br>6 | 81/17913      | 0.<br>00<br>02<br>47<br>35<br>3 | 0.<br>00<br>22<br>51<br>04<br>6 | 0.00166133  | 54/199/384/948/1906/3383/3553/3689/9722/5806/140885/70<br>97/10333                                                                                                                     | 1<br>3 |
| B<br>P | GO:00<br>51282 | regulation of<br>sequesterin<br>g of calcium<br>ion                  | 16/92<br>6 | 114/1791<br>3 | 0.<br>00<br>02<br>51<br>74<br>2 | 0.<br>00<br>22<br>86<br>88<br>1 | 0.001687777 | 6363/6366/6348/1236/930/57214/11151/3627/6373/4283/39<br>32/5027/5031/5788/22821/6622                                                                                                  | 1<br>6 |
| B<br>P | GO:00<br>07263 | nitric oxide<br>mediated<br>signal<br>transduction                   | 7/926      | 26/17913      | 0.<br>00<br>02<br>66<br>83<br>8 | 0.<br>00<br>24<br>11<br>05<br>1 | 0.001779418 | 348/948/2357/4502/9722/51655/7422                                                                                                                                                      | 7      |

|        |                |                                                                 |       |          |                                 |                                 |             |                                            |   |
|--------|----------------|-----------------------------------------------------------------|-------|----------|---------------------------------|---------------------------------|-------------|--------------------------------------------|---|
| B<br>P | GO:00<br>60142 | regulation of syncytium formation by plasma membrane fusion     | 7/926 | 26/17913 | 0.<br>00<br>02<br>66<br>83<br>8 | 0.<br>00<br>24<br>11<br>05<br>1 | 0.001779418 | 575/963/3627/4283/9750/54209/7305          | 7 |
| B<br>P | GO:00<br>60706 | cell differentiation involved in embryonic placenta development | 7/926 | 26/17913 | 0.<br>00<br>02<br>66<br>83<br>8 | 0.<br>00<br>24<br>11<br>05<br>1 | 0.001779418 | 79733/8320/2709/79977/3856/639/9021        | 7 |
| B<br>P | GO:00<br>34142 | toll-like receptor 4 signaling pathway                          | 8/926 | 34/17913 | 0.<br>00<br>02<br>69<br>97<br>7 | 0.<br>00<br>24<br>35<br>08      | 0.001797152 | 929/3684/3689/4057/23643/118788/26191/7128 | 8 |
| B<br>P | GO:00<br>02313 | mature B cell differentiation involved in immune response       | 6/926 | 19/17913 | 0.<br>00<br>02<br>84<br>87<br>7 | 0.<br>00<br>25<br>34<br>00<br>7 | 0.001870162 | 100/55619/139818/2213/1880/9452            | 6 |
| B<br>P | GO:00<br>02544 | chronic inflammatory response                                   | 6/926 | 19/17913 | 0.<br>00<br>02<br>84<br>87<br>7 | 0.<br>00<br>25<br>34<br>00<br>7 | 0.001870162 | 6352/10563/3620/6279/7128/7412             | 6 |
| B<br>P | GO:00<br>46597 | negative regulation of viral entry into host cell               | 6/926 | 19/17913 | 0.<br>00<br>02<br>84<br>87<br>7 | 0.<br>00<br>25<br>34<br>00<br>7 | 0.001870162 | 2219/8519/10581/10410/5806/11074           | 6 |

|        |                |                                                                                                                  |            |               |                                 |                                 |             |                                                                                                                                                                                      |        |
|--------|----------------|------------------------------------------------------------------------------------------------------------------|------------|---------------|---------------------------------|---------------------------------|-------------|--------------------------------------------------------------------------------------------------------------------------------------------------------------------------------------|--------|
| B<br>P | GO:00<br>51767 | nitric-oxide<br>synthase<br>biosynthetic<br>process                                                              | 6/926      | 19/17913      | 0.<br>00<br>02<br>84<br>87<br>7 | 0.<br>00<br>25<br>34<br>00<br>7 | 0.001870162 | 6347/1906/2208/120892/64127/7097                                                                                                                                                     | 6      |
| B<br>P | GO:00<br>51769 | regulation of<br>nitric-oxide<br>synthase<br>biosynthetic<br>process                                             | 6/926      | 19/17913      | 0.<br>00<br>02<br>84<br>87<br>7 | 0.<br>00<br>25<br>34<br>00<br>7 | 0.001870162 | 6347/1906/2208/120892/64127/7097                                                                                                                                                     | 6      |
| B<br>P | GO:00<br>61081 | positive<br>regulation of<br>myeloid<br>leukocyte<br>cytokine<br>production<br>involved in<br>immune<br>response | 6/926      | 19/17913      | 0.<br>00<br>02<br>84<br>87<br>7 | 0.<br>00<br>25<br>34<br>00<br>7 | 0.001870162 | 948/972/2207/51704/10859/8013                                                                                                                                                        | 6      |
| B<br>P | GO:01<br>40131 | positive<br>regulation of<br>lymphocyte<br>chemotaxis                                                            | 6/926      | 19/17913      | 0.<br>00<br>02<br>84<br>87<br>7 | 0.<br>00<br>25<br>34<br>00<br>7 | 0.001870162 | 6366/6348/6351/6352/729230/10563                                                                                                                                                     | 6      |
| B<br>P | GO:00<br>35690 | cellular<br>response to<br>drug                                                                                  | 35/92<br>6 | 362/1791<br>3 | 0.<br>00<br>02<br>84<br>94<br>5 | 0.<br>00<br>25<br>34<br>00<br>7 | 0.001870162 | 107/113/122622/199/9447/969/999/7852/1536/1800/1906/1958/2350/2729/8091/3162/3383/3553/3569/120892/11184/4502/64127/8013/5027/5029/5142/10891/26191/140885/56833/6662/6688/7054/7128 | 3<br>5 |
| B<br>P | GO:00<br>70588 | calcium ion<br>transmembrane<br>transport                                                                        | 30/92<br>6 | 293/1791<br>3 | 0.<br>00<br>02<br>88            | 0.<br>00<br>25<br>63            | 0.001891661 | 150/309/274/777/6363/6366/6348/1236/930/57214/11151/3627/6373/4283/2903/2904/3932/9722/5027/5031/5142/5294/5788/22821/6236/6622/6769/342667/80036/140803                             | 3<br>0 |

|        |                |                                                                   |            |               |                                 |                                 |             |                                                                                                                                                                                    |        |
|--------|----------------|-------------------------------------------------------------------|------------|---------------|---------------------------------|---------------------------------|-------------|------------------------------------------------------------------------------------------------------------------------------------------------------------------------------------|--------|
|        |                |                                                                   |            |               | 72<br>6                         | 13<br>7                         |             |                                                                                                                                                                                    |        |
| B<br>P | GO:00<br>50850 | positive<br>regulation of<br>calcium-me<br>diated<br>signaling    | 9/926      | 43/17913      | 0.<br>00<br>02<br>91<br>7       | 0.<br>00<br>25<br>76<br>00<br>2 | 0.001901156 | 100/6348/6351/916/3084/5031/50852/54209/7535                                                                                                                                       | 9      |
| B<br>P | GO:19<br>04407 | positive<br>regulation of<br>nitric oxide<br>metabolic<br>process | 9/926      | 43/17913      | 0.<br>00<br>02<br>91<br>7       | 0.<br>00<br>25<br>76<br>00<br>2 | 0.001901156 | 199/948/1906/3383/3553/3689/9722/5806/10333                                                                                                                                        | 9      |
| B<br>P | GO:19<br>04646 | cellular<br>response to<br>amyloid-bet<br>a                       | 9/926      | 43/17913      | 0.<br>00<br>02<br>91<br>7       | 0.<br>00<br>25<br>76<br>00<br>2 | 0.001901156 | 948/2213/2358/3383/3676/4804/10333/54209/7412                                                                                                                                      | 9      |
| B<br>P | GO:00<br>43550 | regulation of<br>lipid kinase<br>activity                         | 11/92<br>6 | 62/17913      | 0.<br>00<br>02<br>98<br>98<br>5 | 0.<br>00<br>26<br>35<br>75<br>1 | 0.001945252 | 6363/6366/1236/930/1917/2261/2322/2358/64127/23533/90<br>21                                                                                                                        | 1<br>1 |
| B<br>P | GO:00<br>22612 | gland<br>morphogen<br>esis                                        | 16/92<br>6 | 116/1791<br>3 | 0.<br>00<br>03<br>08<br>06<br>8 | 0.<br>00<br>27<br>11<br>10<br>5 | 0.002000865 | 374/655/1396/1436/2099/3400/284217/4478/4781/9423/103<br>71/5268/6662/7052/7128/8626                                                                                               | 1<br>6 |
| B<br>P | GO:00<br>31589 | cell-substrat<br>e adhesion                                       | 32/92<br>6 | 322/1791<br>3 | 0.<br>00<br>03<br>15<br>01      | 0.<br>00<br>27<br>67<br>40      | 0.002042417 | 56999/4059/6366/1236/948/916/960/10225/1021/11151/556<br>12/83706/342184/2633/2651/3675/3676/3683/3689/3691/38<br>97/4321/64005/64098/5800/5880/6281/6614/9806/80725/74<br>12/7422 | 3<br>2 |

|        |                |                                                                                 |            |               |                                 |                                 |             |                                                                                                                                                                                        |        |
|--------|----------------|---------------------------------------------------------------------------------|------------|---------------|---------------------------------|---------------------------------|-------------|----------------------------------------------------------------------------------------------------------------------------------------------------------------------------------------|--------|
|        |                |                                                                                 |            |               | 1                               | 6                               |             |                                                                                                                                                                                        |        |
| B<br>P | GO:00<br>07599 | hemostasis                                                                      | 33/92<br>6 | 336/1791<br>3 | 0.<br>00<br>03<br>16<br>85<br>1 | 0.<br>00<br>27<br>78<br>74<br>7 | 0.002050787 | 150/84830/653145/348/948/139189/139818/1906/2152/2207<br>/83706/2811/8356/3569/3932/3937/22915/5027/5294/23533/<br>5329/5341/5577/5579/5588/6403/5265/710/6812/7035/7980/<br>7409/7454 | 3<br>3 |
| B<br>P | GO:00<br>07229 | integrin-med<br>iated<br>signaling<br>pathway                                   | 14/92<br>6 | 94/17913      | 0.<br>00<br>03<br>23<br>77<br>2 | 0.<br>00<br>28<br>34<br>54      | 0.002091963 | 2207/55612/83706/3055/3675/3676/3680/3683/3684/3687/3<br>689/5341/7305/7409                                                                                                            | 1<br>4 |
| B<br>P | GO:00<br>16485 | protein<br>processing                                                           | 30/92<br>6 | 295/1791<br>3 | 0.<br>00<br>03<br>24<br>36<br>6 | 0.<br>00<br>28<br>34<br>85<br>1 | 0.002092193 | 712/713/714/717/718/719/720/721/728/730/147372/930/629/<br>3426/1378/1380/26999/2152/2903/3428/3553/7850/5653/12<br>0892/5027/64065/710/5552/55061/11326                               | 3<br>0 |
| B<br>P | GO:00<br>02864 | regulation of<br>acute<br>inflammator<br>y response<br>to antigenic<br>stimulus | 5/926      | 13/17913      | 0.<br>00<br>03<br>31<br>76<br>6 | 0.<br>00<br>28<br>62<br>73<br>9 | 0.002112775 | 695/718/1236/2207/2213                                                                                                                                                                 | 5      |
| B<br>P | GO:00<br>02921 | negative<br>regulation of<br>humoral<br>immune<br>response                      | 5/926      | 13/17913      | 0.<br>00<br>03<br>31<br>76<br>6 | 0.<br>00<br>28<br>62<br>73<br>9 | 0.002112775 | 1378/2213/710/11005/11326                                                                                                                                                              | 5      |
| B<br>P | GO:19<br>00225 | regulation of<br>NLRP3<br>inflammaso<br>me complex<br>assembly                  | 5/926      | 13/17913      | 0.<br>00<br>03<br>31<br>76<br>6 | 0.<br>00<br>28<br>62<br>73<br>9 | 0.002112775 | 948/115362/4210/197358/10333                                                                                                                                                           | 5      |

|        |                |                                                                   |            |               |                                 |                                 |             |                                                                                                                                                                                                     |        |
|--------|----------------|-------------------------------------------------------------------|------------|---------------|---------------------------------|---------------------------------|-------------|-----------------------------------------------------------------------------------------------------------------------------------------------------------------------------------------------------|--------|
| B<br>P | GO:00<br>10959 | regulation of<br>metal ion<br>transport                           | 35/92<br>6 | 365/1791<br>3 | 0.<br>00<br>03<br>32<br>74      | 0.<br>00<br>28<br>62<br>73<br>9 | 0.002112775 | 150/9914/274/6347/6348/6351/6352/930/8832/57214/11151/<br>3627/6373/4283/7852/115352/3383/3603/3792/353514/1085<br>9/10288/23566/9722/5027/5031/5142/5187/5294/6236/6331/<br>6622/6769/342667/54209 | 3<br>5 |
| B<br>P | GO:00<br>00768 | syncytium<br>formation by<br>plasma<br>membrane<br>fusion         | 10/92<br>6 | 53/17913      | 0.<br>00<br>03<br>33<br>03<br>7 | 0.<br>00<br>28<br>62<br>73<br>9 | 0.002112775 | 575/135228/963/50937/3627/4283/4868/9750/54209/7305                                                                                                                                                 | 1<br>0 |
| B<br>P | GO:00<br>43551 | regulation of<br>phosphatidy<br>linositol<br>3-kinase<br>activity | 10/92<br>6 | 53/17913      | 0.<br>00<br>03<br>33<br>03<br>7 | 0.<br>00<br>28<br>62<br>73<br>9 | 0.002112775 | 6363/6366/1236/930/2261/2322/2358/64127/23533/9021                                                                                                                                                  | 1<br>0 |
| B<br>P | GO:01<br>40253 | cell-cell<br>fusion                                               | 10/92<br>6 | 53/17913      | 0.<br>00<br>03<br>33<br>03<br>7 | 0.<br>00<br>28<br>62<br>73<br>9 | 0.002112775 | 575/135228/963/50937/3627/4283/4868/9750/54209/7305                                                                                                                                                 | 1<br>0 |
| B<br>P | GO:00<br>30224 | monocyte<br>differentiatio<br>n                                   | 8/926      | 35/17913      | 0.<br>00<br>03<br>34<br>27<br>4 | 0.<br>00<br>28<br>62<br>73<br>9 | 0.002112775 | 972/1021/1436/3428/133396/3725/8544/7422                                                                                                                                                            | 8      |
| B<br>P | GO:00<br>45066 | regulatory T<br>cell<br>differentiatio<br>n                       | 8/926      | 35/17913      | 0.<br>00<br>03<br>34<br>27<br>4 | 0.<br>00<br>28<br>62<br>73<br>9 | 0.002112775 | 940/1378/1493/3559/3902/10288/11006/26279                                                                                                                                                           | 8      |
| B      | GO:00          | regulation of                                                     | 8/926      | 35/17913      | 0.                              | 0.                              | 0.002112775 | 301/6363/941/942/3594/3662/3718/114548                                                                                                                                                              | 8      |

|        |                |                                                       |        |           |                                 |                                 |             |                                                                                                                                                                            |        |
|--------|----------------|-------------------------------------------------------|--------|-----------|---------------------------------|---------------------------------|-------------|----------------------------------------------------------------------------------------------------------------------------------------------------------------------------|--------|
| P      | 45622          | T-helper cell differentiation                         |        |           | 00<br>03<br>34<br>27<br>4       | 00<br>28<br>62<br>73<br>9       |             |                                                                                                                                                                            |        |
| B<br>P | GO:19<br>03131 | mononuclear cell differentiation                      | 8/926  | 35/17913  | 0.<br>00<br>03<br>34<br>27<br>4 | 0.<br>00<br>28<br>62<br>73<br>9 | 0.002112775 | 972/1021/1436/3428/133396/3725/8544/7422                                                                                                                                   | 8      |
| B<br>P | GO:00<br>50817 | coagulation                                           | 33/926 | 337/17913 | 0.<br>00<br>03<br>34<br>33<br>4 | 0.<br>00<br>28<br>62<br>73<br>9 | 0.002112775 | 150/84830/653145/348/948/139189/139818/1906/2152/2207/83706/2811/8356/3569/3932/3937/22915/5027/5294/23533/5329/5341/5577/5579/5588/6403/5265/710/6812/7035/7980/7409/7454 | 3<br>3 |
| B<br>P | GO:00<br>50688 | regulation of defense response to virus               | 12/926 | 73/17913  | 0.<br>00<br>03<br>37<br>66      | 0.<br>00<br>28<br>86<br>34      | 0.002130194 | 9447/330/55601/10875/51191/3434/3594/3553/3559/10859/4321/7128                                                                                                             | 1<br>2 |
| B<br>P | GO:00<br>14066 | regulation of phosphatidylinositol 3-kinase signaling | 16/926 | 117/17913 | 0.<br>00<br>03<br>40<br>09<br>8 | 0.<br>00<br>28<br>97<br>40<br>8 | 0.002138362 | 6352/940/2322/3059/653361/197358/118788/5293/5294/2353/8395/26051/10125/5649/6403/6662                                                                                     | 1<br>6 |
| B<br>P | GO:00<br>51208 | sequestration of calcium ion                          | 16/926 | 117/17913 | 0.<br>00<br>03<br>40<br>09<br>8 | 0.<br>00<br>28<br>97<br>40<br>8 | 0.002138362 | 6363/6366/6348/1236/930/57214/11151/3627/6373/4283/3932/5027/5031/5788/22821/6622                                                                                          | 1<br>6 |
| B<br>P | GO:00<br>46640 | regulation of alpha-beta T cell                       | 7/926  | 27/17913  | 0.<br>00<br>03                  | 0.<br>00<br>29                  | 0.00215383  | 384/729230/29126/940/916/5788/7535                                                                                                                                         | 7      |

|        |                |                                                                                       |            |               |                                 |                                 |             |                                                                                                                                                                                                                        |        |
|--------|----------------|---------------------------------------------------------------------------------------|------------|---------------|---------------------------------|---------------------------------|-------------|------------------------------------------------------------------------------------------------------------------------------------------------------------------------------------------------------------------------|--------|
|        |                | proliferation                                                                         |            |               | 44<br>28<br>6                   | 18<br>36<br>7                   |             |                                                                                                                                                                                                                        |        |
| B<br>P | GO:00<br>50858 | negative<br>regulation of<br>antigen<br>receptor-me<br>diated<br>signaling<br>pathway | 7/926      | 27/17913      | 0.<br>00<br>03<br>44<br>28<br>6 | 0.<br>00<br>29<br>18<br>36<br>7 | 0.00215383  | 933/2213/115352/2633/11006/23228/26191                                                                                                                                                                                 | 7      |
| B<br>P | GO:00<br>60512 | prostate<br>gland<br>morphogen<br>esis                                                | 7/926      | 27/17913      | 0.<br>00<br>03<br>44<br>28<br>6 | 0.<br>00<br>29<br>18<br>36<br>7 | 0.00215383  | 655/1396/2099/3400/5268/6662/8626                                                                                                                                                                                      | 7      |
| B<br>P | GO:00<br>45766 | positive<br>regulation of<br>angiogenesi<br>s                                         | 23/92<br>6 | 203/1791<br>3 | 0.<br>00<br>03<br>46<br>21<br>4 | 0.<br>00<br>29<br>29<br>81<br>1 | 0.002162276 | 10000/301/306/718/719/728/147372/1116/3576/7852/1536/2<br>152/9734/3099/8091/3162/3553/3687/3689/3696/26051/557<br>9/7422                                                                                              | 2<br>3 |
| B<br>P | GO:00<br>43254 | regulation of<br>protein<br>complex<br>assembly                                       | 38/92<br>6 | 409/1791<br>3 | 0.<br>00<br>03<br>53<br>71<br>6 | 0.<br>00<br>29<br>88<br>30<br>7 | 0.002205448 | 119/9447/348/274/146206/6366/1236/948/11151/10563/209<br>9/342184/115362/3055/3059/3304/3383/10788/3512/3725/3<br>936/4210/4478/3071/197358/4868/5063/5341/55607/6403/6<br>622/6812/10333/147138/129293/7422/7453/7454 | 3<br>8 |
| B<br>P | GO:00<br>45069 | regulation of<br>viral<br>genome<br>replication                                       | 14/92<br>6 | 95/17913      | 0.<br>00<br>03<br>62<br>00<br>9 | 0.<br>00<br>30<br>53<br>28<br>3 | 0.002253401 | 6352/940/3576/8091/3428/3429/3434/8519/10581/10410/40<br>57/4599/8638/91543                                                                                                                                            | 1<br>4 |
| B<br>P | GO:00<br>34612 | response to<br>tumor<br>necrosis                                                      | 29/92<br>6 | 284/1791<br>3 | 0.<br>00<br>03                  | 0.<br>00<br>31                  | 0.002351464 | 3899/9447/27063/330/6347/6348/6352/929/939/1116/3576/1<br>906/2633/3304/3383/3856/4050/10891/5696/5698/6401/712<br>8/4982/23495/8600/10673/10537/7412/7538                                                             | 2<br>9 |



|        |                |                                                        |            |           |                                 |                                 |             |                                                                                                                                |        |
|--------|----------------|--------------------------------------------------------|------------|-----------|---------------------------------|---------------------------------|-------------|--------------------------------------------------------------------------------------------------------------------------------|--------|
|        |                | factor                                                 |            |           | 78<br>39<br>1                   | 86<br>15<br>4                   |             |                                                                                                                                |        |
| B<br>P | GO:00<br>30193 | regulation of<br>blood<br>coagulation                  | 12/92<br>6 | 74/17913  | 0.<br>00<br>03<br>84<br>37<br>6 | 0.<br>00<br>32<br>25<br>83<br>2 | 0.002380747 | 84830/348/948/1906/2152/2811/5329/5341/5588/6403/710/7035                                                                      | 1<br>2 |
| B<br>P | GO:00<br>60291 | long-term<br>synaptic<br>potentiation                  | 12/92<br>6 | 74/17913  | 0.<br>00<br>03<br>84<br>37<br>6 | 0.<br>00<br>32<br>25<br>83<br>2 | 0.002380747 | 107/348/2048/2903/10288/27065/55607/5649/22941/6622/91683/7305                                                                 | 1<br>2 |
| B<br>P | GO:00<br>38061 | NIK/NF-kap<br>paB<br>signaling                         | 21/92<br>6 | 179/17913 | 0.<br>00<br>03<br>85<br>61<br>6 | 0.<br>00<br>32<br>30<br>89<br>1 | 0.002384481 | 222487/330/655/6363/929/939/1116/1906/84868/3553/197358/114548/64127/4306/5696/5698/26191/7097/10333/51284/54209               | 2<br>1 |
| B<br>P | GO:00<br>50807 | regulation of<br>synapse<br>organization               | 24/92<br>6 | 218/17913 | 0.<br>00<br>03<br>98<br>58<br>2 | 0.<br>00<br>33<br>34<br>01<br>7 | 0.00246059  | 575/348/1006/2048/2213/2904/57549/3587/3556/10288/4038/120892/266727/5818/4897/9423/5063/55607/5800/5649/84189/6622/80725/7097 | 2<br>4 |
| B<br>P | GO:00<br>42417 | dopamine<br>metabolic<br>process                       | 8/926      | 36/17913  | 0.<br>00<br>04<br>10<br>51<br>8 | 0.<br>00<br>34<br>28<br>19<br>3 | 0.002530095 | 2903/3684/3689/4129/4929/6622/9627/7054                                                                                        | 8      |
| B<br>P | GO:00<br>32874 | positive<br>regulation of<br>stress-activ<br>ated MAPK | 19/92<br>6 | 155/17913 | 0.<br>00<br>04<br>14            | 0.<br>00<br>34<br>52            | 0.002548383 | 6363/6366/1236/939/1906/10595/2213/3553/11184/653361/64127/10125/10371/6504/10333/8600/23043/7422/9839                         | 1<br>9 |

|        |                |                                                             |            |               |                                 |                                 |             |                                                                                                                                                   |        |
|--------|----------------|-------------------------------------------------------------|------------|---------------|---------------------------------|---------------------------------|-------------|---------------------------------------------------------------------------------------------------------------------------------------------------|--------|
|        |                | cascade                                                     |            |               | 16<br>6                         | 97<br>4                         |             |                                                                                                                                                   |        |
| B<br>P | GO:00<br>50922 | negative<br>regulation of<br>chemotaxis                     | 9/926      | 45/17913      | 0.<br>00<br>04<br>17<br>80<br>1 | 0.<br>00<br>34<br>77<br>55<br>6 | 0.002566526 | 199/6347/10563/1843/11240/5800/6091/56833/26228                                                                                                   | 9      |
| B<br>P | GO:19<br>04018 | positive<br>regulation of<br>vasculature<br>developmen<br>t | 25/92<br>6 | 232/1791<br>3 | 0.<br>00<br>04<br>21<br>59<br>8 | 0.<br>00<br>35<br>03<br>41<br>4 | 0.00258561  | 10000/301/306/718/719/728/147372/1116/3576/7852/1536/1958/2152/9734/3099/8091/3162/3553/3687/3689/3696/26051/5579/6648/7422                       | 2<br>5 |
| B<br>P | GO:00<br>51235 | maintenanc<br>e of location                                 | 29/92<br>6 | 286/1791<br>3 | 0.<br>00<br>04<br>24<br>87<br>9 | 0.<br>00<br>35<br>24<br>89<br>8 | 0.002601466 | 348/718/6363/6366/6348/1236/930/948/57214/11151/3627/6373/4283/23136/2201/29923/3099/3553/3569/3932/4023/4481/5027/5031/5788/22821/6279/6622/5552 | 2<br>9 |
| B<br>P | GO:19<br>00046 | regulation of<br>hemostasis                                 | 12/92<br>6 | 75/17913      | 0.<br>00<br>04<br>36<br>43<br>7 | 0.<br>00<br>36<br>04<br>53<br>8 | 0.002660242 | 84830/348/948/1906/2152/2811/5329/5341/5588/6403/710/7035                                                                                         | 1<br>2 |
| B<br>P | GO:00<br>01516 | prostaglandi<br>n<br>biosynthetic<br>process                | 7/926      | 28/17913      | 0.<br>00<br>04<br>38<br>74<br>5 | 0.<br>00<br>36<br>04<br>53<br>8 | 0.002660242 | 972/1906/2171/3553/5730/5742/6916                                                                                                                 | 7      |
| B<br>P | GO:00<br>01773 | myeloid<br>dendritic cell<br>activation                     | 7/926      | 28/17913      | 0.<br>00<br>04<br>38<br>74      | 0.<br>00<br>36<br>04<br>53      | 0.002660242 | 914/1794/84868/3662/6504/6688/10537                                                                                                               | 7      |

|        |                |                                                                                         |            |               |                                 |                                 |             |                                                                                                                                           |        |
|--------|----------------|-----------------------------------------------------------------------------------------|------------|---------------|---------------------------------|---------------------------------|-------------|-------------------------------------------------------------------------------------------------------------------------------------------|--------|
| B<br>P | GO:00<br>32814 | regulation of<br>natural killer<br>cell<br>activation                                   | 7/926      | 28/17913      | 0.<br>00<br>04<br>38<br>74<br>5 | 0.<br>00<br>36<br>04<br>53<br>8 | 0.002660242 | 84868/3134/639/26191/10125/9760/7305                                                                                                      | 7      |
| B<br>P | GO:00<br>45577 | regulation of<br>B cell<br>differentiation                                              | 7/926      | 28/17913      | 0.<br>00<br>04<br>38<br>74<br>5 | 0.<br>00<br>36<br>04<br>53<br>8 | 0.002660242 | 695/939/115352/22806/3071/150372/56833                                                                                                    | 7      |
| B<br>P | GO:00<br>46457 | prostanoid<br>biosynthetic<br>process                                                   | 7/926      | 28/17913      | 0.<br>00<br>04<br>38<br>74<br>5 | 0.<br>00<br>36<br>04<br>53<br>8 | 0.002660242 | 972/1906/2171/3553/5730/5742/6916                                                                                                         | 7      |
| B<br>P | GO:00<br>70304 | positive<br>regulation of<br>stress-activated protein<br>kinase<br>signaling<br>cascade | 19/92<br>6 | 156/1791<br>3 | 0.<br>00<br>04<br>49<br>28<br>8 | 0.<br>00<br>36<br>82<br>64<br>7 | 0.002717889 | 6363/6366/1236/939/1906/10595/2213/3553/11184/653361/<br>64127/10125/10371/6504/10333/8600/23043/7422/9839                                | 1<br>9 |
| B<br>P | GO:00<br>98742 | cell-cell<br>adhesion via<br>plasma-membrane<br>adhesion<br>molecules                   | 25/92<br>6 | 233/1791<br>3 | 0.<br>00<br>04<br>49<br>70<br>6 | 0.<br>00<br>36<br>82<br>64<br>7 | 0.002717889 | 57863/30835/923/8832/999/1952/1525/1824/1829/3383/355<br>6/3683/3684/3689/120425/266727/5818/5365/5979/6091/54<br>549/6401/6402/6403/7412 | 2<br>5 |
| B<br>P | GO:00<br>06949 | syncytium<br>formation                                                                  | 10/92<br>6 | 55/17913      | 0.<br>00<br>04<br>54<br>98      | 0.<br>00<br>37<br>19<br>22      | 0.002744881 | 575/135228/963/50937/3627/4283/4868/9750/54209/7305                                                                                       | 1<br>0 |

|        |                |                                                                             |            |               |                                 |                                 |             |                                                                                                                                           |        |
|--------|----------------|-----------------------------------------------------------------------------|------------|---------------|---------------------------------|---------------------------------|-------------|-------------------------------------------------------------------------------------------------------------------------------------------|--------|
|        |                |                                                                             |            |               | 1                               | 1                               |             |                                                                                                                                           |        |
| B<br>P | GO:00<br>32872 | regulation of<br>stress-activ<br>ated MAPK<br>cascade                       | 24/92<br>6 | 220/1791<br>3 | 0.<br>00<br>04<br>55<br>63<br>9 | 0.<br>00<br>37<br>19<br>22<br>1 | 0.002744881 | 6363/6366/1236/939/1843/1906/10595/355/2213/3553/1118<br>4/653361/64127/5187/26191/10125/10371/140885/6504/103<br>33/8600/23043/7422/9839 | 2<br>4 |
| B<br>P | GO:00<br>45428 | regulation of<br>nitric oxide<br>biosynthetic<br>process                    | 11/92<br>6 | 65/17913      | 0.<br>00<br>04<br>57<br>17<br>9 | 0.<br>00<br>37<br>25<br>79<br>1 | 0.00274973  | 54/199/948/1906/3383/3553/3689/9722/5806/140885/10333                                                                                     | 1<br>1 |
| B<br>P | GO:00<br>60401 | cytosolic<br>calcium ion<br>transport                                       | 19/92<br>6 | 157/1791<br>3 | 0.<br>00<br>04<br>86<br>96<br>3 | 0.<br>00<br>39<br>62<br>14<br>6 | 0.002924166 | 6363/6366/6348/1236/930/57214/11151/3627/6373/4283/29<br>03/2904/3932/931/5027/5031/5788/22821/6622                                       | 1<br>9 |
| B<br>P | GO:00<br>10935 | regulation of<br>macrophage<br>cytokine<br>production                       | 5/926      | 14/17913      | 0.<br>00<br>04<br>94<br>18<br>7 | 0.<br>00<br>39<br>71<br>01<br>4 | 0.002930711 | 948/972/51704/11213/10859                                                                                                                 | 5      |
| B<br>P | GO:00<br>19883 | antigen<br>processing<br>and<br>presentation<br>of<br>endogenous<br>antigen | 5/926      | 14/17913      | 0.<br>00<br>04<br>94<br>18<br>7 | 0.<br>00<br>39<br>71<br>01<br>4 | 0.002930711 | 972/64167/3134/6890/6891                                                                                                                  | 5      |
| B<br>P | GO:00<br>30889 | negative<br>regulation of<br>B cell<br>proliferation                        | 5/926      | 14/17913      | 0.<br>00<br>04<br>94<br>18      | 0.<br>00<br>39<br>71<br>01      | 0.002930711 | 695/1493/2213/4332/7305                                                                                                                   | 5      |

|        |                |                                                                                  |            |               |                                 |                                 |             |                                                                                                    |        |
|--------|----------------|----------------------------------------------------------------------------------|------------|---------------|---------------------------------|---------------------------------|-------------|----------------------------------------------------------------------------------------------------|--------|
|        |                |                                                                                  |            |               | 7                               | 4                               |             |                                                                                                    |        |
| B<br>P | GO:00<br>46851 | negative<br>regulation of<br>bone<br>remodeling                                  | 5/926      | 14/17913      | 0.<br>00<br>04<br>94<br>18<br>7 | 0.<br>00<br>39<br>71<br>01<br>4 | 0.002930711 | 952/3569/5027/7128/4982                                                                            | 5      |
| B<br>P | GO:00<br>50862 | positive<br>regulation of<br>T cell<br>receptor<br>signaling<br>pathway          | 5/926      | 14/17913      | 0.<br>00<br>04<br>94<br>18<br>7 | 0.<br>00<br>39<br>71<br>01<br>4 | 0.002930711 | 100/1236/3932/9840/50852                                                                           | 5      |
| B<br>P | GO:00<br>51770 | positive<br>regulation of<br>nitric-oxide<br>synthase<br>biosynthetic<br>process | 5/926      | 14/17913      | 0.<br>00<br>04<br>94<br>18<br>7 | 0.<br>00<br>39<br>71<br>01<br>4 | 0.002930711 | 6347/2208/120892/64127/7097                                                                        | 5      |
| B<br>P | GO:00<br>70166 | enamel<br>mineralizati<br>on                                                     | 5/926      | 14/17913      | 0.<br>00<br>04<br>94<br>18<br>7 | 0.<br>00<br>39<br>71<br>01<br>4 | 0.002930711 | 54757/5818/152816/6899/256764                                                                      | 5      |
| B<br>P | GO:00<br>06809 | nitric oxide<br>biosynthetic<br>process                                          | 12/92<br>6 | 76/17913      | 0.<br>00<br>04<br>94<br>32      | 0.<br>00<br>39<br>71<br>01<br>4 | 0.002930711 | 54/199/384/948/1906/3383/3553/3689/9722/5806/140885/10<br>333                                      | 1<br>2 |
| B<br>P | GO:00<br>30041 | actin<br>filament<br>polymerizati<br>on                                          | 18/92<br>6 | 145/1791<br>3 | 0.<br>00<br>04<br>98<br>99<br>8 | 0.<br>00<br>39<br>84<br>42<br>5 | 0.002940608 | 119/199/274/146206/6366/1236/23242/11151/342184/3055/<br>3059/3383/10788/3071/4868/5063/55607/7454 | 1<br>8 |

|        |                |                                                                              |            |               |                                 |                                 |             |                                                                                                    |        |
|--------|----------------|------------------------------------------------------------------------------|------------|---------------|---------------------------------|---------------------------------|-------------|----------------------------------------------------------------------------------------------------|--------|
| B<br>P | GO:00<br>42133 | neurotransmitter<br>metabolic<br>process                                     | 18/92<br>6 | 145/1791<br>3 | 0.<br>00<br>04<br>98<br>99<br>8 | 0.<br>00<br>39<br>84<br>42<br>5 | 0.002940608 | 54/199/384/948/1806/1906/2903/3383/3553/3689/4129/9722<br>/5806/140885/6507/7054/7097/10333        | 1<br>8 |
| B<br>P | GO:00<br>50806 | positive<br>regulation of<br>synaptic<br>transmission                        | 18/92<br>6 | 145/1791<br>3 | 0.<br>00<br>04<br>98<br>99<br>8 | 0.<br>00<br>39<br>84<br>42<br>5 | 0.002940608 | 107/348/8938/6347/729230/2048/2903/8564/10288/27065/5<br>5607/5649/22941/6507/6622/6812/91683/7305 | 1<br>8 |
| B<br>P | GO:00<br>43029 | T cell<br>homeostasis                                                        | 8/926      | 37/17913      | 0.<br>00<br>05<br>00<br>30<br>5 | 0.<br>00<br>39<br>84<br>42<br>5 | 0.002940608 | 11151/84636/3559/3718/3071/5027/124976/1831                                                        | 8      |
| B<br>P | GO:00<br>45124 | regulation of<br>bone<br>resorption                                          | 8/926      | 37/17913      | 0.<br>00<br>05<br>00<br>30<br>5 | 0.<br>00<br>39<br>84<br>42<br>5 | 0.002940608 | 952/1436/53832/3569/5027/7128/4982/8600                                                            | 8      |
| B<br>P | GO:00<br>50848 | regulation of<br>calcium-me<br>diated<br>signaling                           | 14/92<br>6 | 98/17913      | 0.<br>00<br>05<br>00<br>70<br>6 | 0.<br>00<br>39<br>84<br>42<br>5 | 0.002940608 | 100/6348/6351/933/916/2633/120892/3084/5031/5341/1827/<br>50852/54209/7535                         | 1<br>4 |
| B<br>P | GO:20<br>00117 | negative<br>regulation of<br>cysteine-ty<br>pe<br>endopeptida<br>se activity | 13/92<br>6 | 87/17913      | 0.<br>00<br>05<br>06<br>79<br>5 | 0.<br>00<br>40<br>20<br>37      | 0.002967137 | 939/960/1800/3428/2537/27074/4057/4318/4804/5329/5272/<br>6622/7422                                | 1<br>3 |
| B      | GO:00          | actin                                                                        | 20/92      | 170/1791      | 0.                              | 0.                              | 0.002967137 | 119/199/274/146206/6366/1236/23242/11151/342184/3055/                                              | 2      |

|        |                |                                                                 |            |               |                                 |                                 |             |                                                                                                                                                                             |        |
|--------|----------------|-----------------------------------------------------------------|------------|---------------|---------------------------------|---------------------------------|-------------|-----------------------------------------------------------------------------------------------------------------------------------------------------------------------------|--------|
| P      | 08154          | polymerization or depolymerization                              | 6          | 3             | 00<br>05<br>06<br>80<br>9       | 00<br>40<br>20<br>37            |             | 3059/3383/10788/3071/4868/5063/5341/55607/7454/7456                                                                                                                         | 0      |
| B<br>P | GO:00<br>50803 | regulation of synapse structure or activity                     | 24/92<br>6 | 222/1791<br>3 | 0.<br>00<br>05<br>19<br>72<br>6 | 0.<br>00<br>41<br>09<br>97      | 0.003033264 | 575/348/1006/2048/2213/2904/57549/3587/3556/10288/4038/120892/266727/5818/4897/9423/5063/55607/5800/5649/84189/6622/80725/7097                                              | 2<br>4 |
| B<br>P | GO:00<br>70302 | regulation of stress-activated protein kinase signaling cascade | 24/92<br>6 | 222/1791<br>3 | 0.<br>00<br>05<br>19<br>72<br>6 | 0.<br>00<br>41<br>09<br>97      | 0.003033264 | 6363/6366/1236/939/1843/1906/10595/355/2213/3553/11184/653361/64127/5187/26191/10125/10371/140885/6504/10333/8600/23043/7422/9839                                           | 2<br>4 |
| B<br>P | GO:19<br>03409 | reactive oxygen species biosynthetic process                    | 16/92<br>6 | 122/1791<br>3 | 0.<br>00<br>05<br>46<br>94<br>5 | 0.<br>00<br>43<br>18<br>41<br>4 | 0.003187101 | 54/575/199/384/948/1536/1906/3383/3553/3689/4129/9722/5806/140885/6622/10333                                                                                                | 1<br>6 |
| B<br>P | GO:00<br>48545 | response to steroid hormone                                     | 35/92<br>6 | 375/1791<br>3 | 0.<br>00<br>05<br>47<br>78<br>9 | 0.<br>00<br>43<br>18<br>41<br>4 | 0.003187101 | 21/23205/84830/199/249/301/374/655/952/1536/1601/1829/1843/1906/2099/2322/23426/3383/3569/4129/4306/3164/4929/8013/11240/5069/5187/10891/6696/7035/7054/7068/7097/8626/7538 | 3<br>5 |
| B<br>P | GO:00<br>72538 | T-helper 17 type immune response                                | 7/926      | 29/17913      | 0.<br>00<br>05<br>52<br>78<br>9 | 0.<br>00<br>43<br>51<br>07      | 0.003211201 | 3594/3569/3662/4063/114548/5588/114836                                                                                                                                      | 7      |
| B<br>P | GO:19<br>02106 | negative regulation of                                          | 14/92<br>6 | 99/17913      | 0.<br>00                        | 0.<br>00                        | 0.003224794 | 301/714/6348/972/1021/1493/2213/3718/3902/10859/11006/4057/55365/28959                                                                                                      | 1<br>4 |

|        |                |                                                   |            |               |                                 |                                 |             |                                                                                                                                                                                                                      |        |
|--------|----------------|---------------------------------------------------|------------|---------------|---------------------------------|---------------------------------|-------------|----------------------------------------------------------------------------------------------------------------------------------------------------------------------------------------------------------------------|--------|
|        |                | leukocyte differentiation                         |            |               | 05<br>55<br>99<br>1             | 43<br>69<br>48<br>7             |             |                                                                                                                                                                                                                      |        |
| B<br>P | GO:00<br>45637 | regulation of myeloid cell differentiation        | 26/92<br>6 | 250/1791<br>3 | 0.<br>00<br>05<br>63<br>65<br>1 | 0.<br>00<br>44<br>22<br>83      | 0.003264162 | 714/6348/972/1021/1441/2124/2811/29909/3059/8356/8361/3218/3304/3725/10859/11006/4057/3071/8013/5579/5588/6688/8600/54209/7305/7538                                                                                  | 2<br>6 |
| B<br>P | GO:00<br>45862 | positive regulation of proteolysis                | 32/92<br>6 | 333/1791<br>3 | 0.<br>00<br>05<br>66<br>64<br>6 | 0.<br>00<br>44<br>39<br>46      | 0.003276436 | 150/9447/348/718/147372/1285/1378/26999/1601/112399/2152/355/2729/2903/2904/3428/3553/90865/3932/120892/4210/4804/22861/114548/26471/26577/64065/149628/6091/6279/6622/54209                                         | 3<br>2 |
| B<br>P | GO:00<br>43122 | regulation of I-kappaB kinase/NF-kappaB signaling | 24/92<br>6 | 224/1791<br>3 | 0.<br>00<br>05<br>91<br>55<br>6 | 0.<br>00<br>46<br>27<br>46<br>5 | 0.003415188 | 330/6363/6366/1236/948/972/2099/51704/3162/3553/4057/197358/64127/5187/11040/5579/6398/140885/7052/10333/7128/8600/10346/10537                                                                                       | 2<br>4 |
| B<br>P | GO:00<br>01501 | skeletal system development                       | 42/92<br>6 | 479/1791<br>3 | 0.<br>00<br>05<br>93<br>56<br>5 | 0.<br>00<br>46<br>36<br>02<br>7 | 0.003421507 | 54/249/655/960/1116/50515/1310/55790/56603/1749/1906/2201/2261/342184/79977/8091/3209/3213/3215/3216/3218/3481/3696/10859/4057/4094/4318/4781/5027/5079/5251/5788/860/6662/124976/6899/7020/4982/8600/8626/7227/7305 | 4<br>2 |
| B<br>P | GO:00<br>32418 | lysosome localization                             | 11/92<br>6 | 67/17913      | 0.<br>00<br>05<br>97<br>47<br>4 | 0.<br>00<br>46<br>59<br>37<br>6 | 0.00343874  | 30817/695/8832/2207/3162/8013/5293/5294/5880/10125/6812                                                                                                                                                              | 1<br>1 |
| B<br>P | GO:00<br>71496 | cellular response to external                     | 31/92<br>6 | 320/1791<br>3 | 0.<br>00<br>05                  | 0.<br>00<br>46                  | 0.003443879 | 199/27063/467/1536/1824/355/2350/2729/3162/3383/3428/3553/3676/3725/57535/4023/120892/4316/4929/5027/5029/5251/5788/9750/58528/143686/6513/6662/51284/51311/7412                                                     | 3<br>1 |



|        |                |                                                                                       |            |               |                                 |                                       |             |                                                                                                                                             |        |
|--------|----------------|---------------------------------------------------------------------------------------|------------|---------------|---------------------------------|---------------------------------------|-------------|---------------------------------------------------------------------------------------------------------------------------------------------|--------|
|        |                | stimulus                                                                              |            |               | 99<br>28<br>7                   | 66<br>34                              |             |                                                                                                                                             |        |
| B<br>P | GO:00<br>50856 | regulation of<br>T cell<br>receptor<br>signaling<br>pathway                           | 8/926      | 38/17913      | 0.<br>00<br>06<br>05<br>35<br>5 | 0.<br>00<br>00<br>47<br>06<br>35<br>9 | 0.003473414 | 100/1236/2633/3932/11006/26191/9840/50852                                                                                                   | 8      |
| B<br>P | GO:19<br>03428 | positive<br>regulation of<br>reactive<br>oxygen<br>species<br>biosynthetic<br>process | 10/92<br>6 | 57/17913      | 0.<br>00<br>06<br>11<br>86<br>1 | 0.<br>00<br>47<br>49<br>65<br>6       | 0.003505368 | 575/199/948/1906/3383/3553/3689/9722/5806/10333                                                                                             | 1<br>0 |
| B<br>P | GO:00<br>51402 | neuron<br>apoptotic<br>process                                                        | 25/92<br>6 | 238/1791<br>3 | 0.<br>00<br>06<br>16<br>33<br>1 | 0.<br>00<br>47<br>73<br>84<br>5       | 0.00352322  | 728/6347/6348/10752/11151/112399/2729/3162/3684/3725/<br>4804/22861/4929/8013/26471/5063/10891/54463/6622/6648<br>/6812/7020/7068/8626/7305 | 2<br>5 |
| B<br>P | GO:00<br>35821 | modification<br>of<br>morphology<br>or<br>physiology<br>of other<br>organism          | 19/92<br>6 | 160/1791<br>3 | 0.<br>00<br>06<br>16<br>86<br>1 | 0.<br>00<br>47<br>73<br>84<br>5       | 0.00352322  | 348/6357/6348/6351/6352/30835/10332/2208/10578/8091/3<br>429/3725/4057/4069/219972/5027/5551/5806/5272                                      | 1<br>9 |
| B<br>P | GO:19<br>03305 | regulation of<br>regulated<br>secretory<br>pathway                                    | 17/92<br>6 | 136/1791<br>3 | 0.<br>00<br>06<br>52<br>62<br>3 | 0.<br>00<br>50<br>42<br>90<br>4       | 0.003721793 | 107/30817/150/321/8938/729230/8832/2207/2213/3134/316<br>2/3684/3689/120892/5579/5880/6812                                                  | 1<br>7 |
| B<br>P | GO:00<br>08360 | regulation of<br>cell shape                                                           | 16/92<br>6 | 124/1791<br>3 | 0.<br>00                        | 0.<br>00                              | 0.0037338   | 301/55843/6357/6347/6348/11151/1436/23136/752/3055/33<br>83/3689/4478/57619/375611/7422                                                     | 1<br>6 |

|        |                |                                                                                    |            |               |                                 |                                       |             |                                                                                                                                                                                                        |        |
|--------|----------------|------------------------------------------------------------------------------------|------------|---------------|---------------------------------|---------------------------------------|-------------|--------------------------------------------------------------------------------------------------------------------------------------------------------------------------------------------------------|--------|
|        |                |                                                                                    |            |               | 06<br>55<br>72<br>6             | 50<br>59<br>17<br>3                   |             |                                                                                                                                                                                                        |        |
| B<br>P | GO:00<br>10950 | positive<br>regulation of<br>endopeptida<br>se activity                            | 19/92<br>6 | 161/1791<br>3 | 0.<br>00<br>06<br>66<br>33<br>6 | 0.<br>00<br>00<br>51<br>33<br>21<br>9 | 0.003788448 | 9447/1285/1378/26999/112399/2152/355/2903/2904/3428/3<br>932/4210/4804/22861/114548/64065/6091/6279/6622                                                                                               | 1<br>9 |
| B<br>P | GO:00<br>99177 | regulation of<br>trans-synapt<br>ic signaling                                      | 36/92<br>6 | 394/1791<br>3 | 0.<br>00<br>06<br>80<br>40<br>5 | 0.<br>00<br>52<br>31<br>79<br>6       | 0.0038612   | 107/575/321/348/8938/6347/729230/952/999/1630/1906/195<br>9/2048/2171/2903/2904/3274/3553/8564/10288/120892/797<br>72/27065/23228/55607/5577/5579/5649/22941/6507/6622/9<br>627/6812/91683/347733/7305 | 3<br>6 |
| B<br>P | GO:19<br>03426 | regulation of<br>reactive<br>oxygen<br>species<br>biosynthetic<br>process          | 14/92<br>6 | 101/1791<br>3 | 0.<br>00<br>06<br>82<br>22<br>9 | 0.<br>00<br>52<br>31<br>79<br>6       | 0.0038612   | 54/575/199/384/948/1906/3383/3553/3689/9722/5806/14088<br>5/6622/10333                                                                                                                                 | 1<br>4 |
| B<br>P | GO:20<br>00379 | positive<br>regulation of<br>reactive<br>oxygen<br>species<br>metabolic<br>process | 14/92<br>6 | 101/1791<br>3 | 0.<br>00<br>06<br>82<br>22<br>9 | 0.<br>00<br>52<br>31<br>79<br>6       | 0.0038612   | 575/199/948/1906/2358/3383/3553/3684/3689/9722/5806/66<br>22/10333/7305                                                                                                                                | 1<br>4 |
| B<br>P | GO:00<br>32656 | regulation of<br>interleukin-1<br>3 production                                     | 6/926      | 22/17913      | 0.<br>00<br>06<br>85<br>68<br>6 | 0.<br>00<br>52<br>34<br>55<br>2       | 0.003863235 | 384/3556/90865/3662/353514/114548                                                                                                                                                                      | 6      |
| B<br>P | GO:00<br>45624 | positive<br>regulation of                                                          | 6/926      | 22/17913      | 0.<br>00                        | 0.<br>00                              | 0.003863235 | 301/6363/941/942/3594/114548                                                                                                                                                                           | 6      |

|        |                |                                                    |            |               |                                 |                                       |             |                                                                                                                                  |        |
|--------|----------------|----------------------------------------------------|------------|---------------|---------------------------------|---------------------------------------|-------------|----------------------------------------------------------------------------------------------------------------------------------|--------|
|        |                | T-helper cell differentiation                      |            |               | 06<br>85<br>68<br>6             | 52<br>34<br>55<br>2                   |             |                                                                                                                                  |        |
| B<br>P | GO:19<br>03306 | negative regulation of regulated secretory pathway | 6/926      | 22/17913      | 0.<br>00<br>06<br>85<br>68<br>6 | 0.<br>00<br>06<br>52<br>34<br>55<br>2 | 0.003863235 | 150/729230/8832/2213/3134/3162                                                                                                   | 6      |
| B<br>P | GO:00<br>32689 | negative regulation of interferon-gamma production | 7/926      | 30/17913      | 0.<br>00<br>06<br>89<br>19<br>5 | 0.<br>00<br>06<br>52<br>35<br>61<br>8 | 0.003864021 | 29126/10225/84868/9173/90865/10859/80380                                                                                         | 7      |
| B<br>P | GO:00<br>46596 | regulation of viral entry into host cell           | 7/926      | 30/17913      | 0.<br>00<br>06<br>89<br>19<br>5 | 0.<br>00<br>06<br>52<br>35<br>61<br>8 | 0.003864021 | 972/2219/8519/10581/10410/5806/11074                                                                                             | 7      |
| B<br>P | GO:00<br>07254 | JNK cascade                                        | 22/92<br>6 | 200/1791<br>3 | 0.<br>00<br>06<br>90<br>79<br>8 | 0.<br>00<br>06<br>52<br>35<br>61<br>8 | 0.003864021 | 6363/6366/1236/939/1906/10595/2213/3553/11184/653361/<br>64127/4868/5187/26191/10125/10371/140885/6504/10333/8<br>600/23043/9839 | 2<br>2 |
| B<br>P | GO:00<br>09612 | response to mechanical stimulus                    | 22/92<br>6 | 200/1791<br>3 | 0.<br>00<br>06<br>90<br>79<br>8 | 0.<br>00<br>06<br>52<br>35<br>61<br>8 | 0.003864021 | 84059/27063/1116/3627/7852/1906/355/2729/3553/3725/43<br>16/5027/9750/6507/375611/6513/84189/6662/64220/51284/<br>51311/7273     | 2<br>2 |
| B<br>P | GO:00<br>17157 | regulation of exocytosis                           | 21/92<br>6 | 187/1791<br>3 | 0.<br>00<br>06                  | 0.<br>00<br>06<br>52                  | 0.003864021 | 107/30817/150/301/321/8938/729230/8832/2207/2213/3134/<br>3162/3684/3689/120892/5579/5874/5880/6622/6812/7447                    | 2<br>1 |

|        |                |                                                                             |            |           |                                 |                                 |            |                                                                            |        |
|--------|----------------|-----------------------------------------------------------------------------|------------|-----------|---------------------------------|---------------------------------|------------|----------------------------------------------------------------------------|--------|
|        |                |                                                                             |            |           | 90<br>99                        | 35<br>61<br>8                   |            |                                                                            |        |
| B<br>P | GO:00<br>50818 | regulation of<br>coagulation                                                | 12/92<br>6 | 79/17913  | 0.<br>00<br>07<br>08<br>10<br>7 | 0.<br>00<br>53<br>07<br>32<br>2 | 0.00391694 | 84830/348/948/1906/2152/2811/5329/5341/5588/6403/710/7035                  | 1<br>2 |
| B<br>P | GO:00<br>46717 | acid<br>secretion                                                           | 15/92<br>6 | 113/17913 | 0.<br>00<br>07<br>08<br>74<br>7 | 0.<br>00<br>53<br>07<br>32<br>2 | 0.00391694 | 5244/366/1906/3274/3553/8564/5027/26279/8497/6446/6507/6622/6812/8600/9256 | 1<br>5 |
| B<br>P | GO:00<br>02467 | germinal<br>center<br>formation                                             | 5/926      | 15/17913  | 0.<br>00<br>07<br>09<br>87<br>7 | 0.<br>00<br>53<br>07<br>32<br>2 | 0.00391694 | 100/10563/89857/7128/10673                                                 | 5      |
| B<br>P | GO:00<br>02716 | negative<br>regulation of<br>natural killer<br>cell<br>mediated<br>immunity | 5/926      | 15/17913  | 0.<br>00<br>07<br>09<br>87<br>7 | 0.<br>00<br>53<br>07<br>32<br>2 | 0.00391694 | 10225/84868/3134/10859/5272                                                | 5      |
| B<br>P | GO:00<br>10819 | regulation of<br>T cell<br>chemotaxis                                       | 5/926      | 15/17913  | 0.<br>00<br>07<br>09<br>87<br>7 | 0.<br>00<br>53<br>07<br>32<br>2 | 0.00391694 | 6366/6352/729230/3627/10563                                                | 5      |
| B<br>P | GO:00<br>34134 | toll-like<br>receptor 2<br>signaling<br>pathway                             | 5/926      | 15/17913  | 0.<br>00<br>07<br>09            | 0.<br>00<br>53<br>07            | 0.00391694 | 118788/7096/7097/10333/7128                                                | 5      |

|        |                |                                                         |            |               |                                 |                                 |             |                                                                                                                               |        |
|--------|----------------|---------------------------------------------------------|------------|---------------|---------------------------------|---------------------------------|-------------|-------------------------------------------------------------------------------------------------------------------------------|--------|
|        |                |                                                         |            |               | 87<br>7                         | 32<br>2                         |             |                                                                                                                               |        |
| B<br>P | GO:00<br>44406 | adhesion of<br>symbiont to<br>host                      | 5/926      | 15/17913      | 0.<br>00<br>07<br>09<br>87<br>7 | 0.<br>00<br>53<br>07<br>32<br>2 | 0.00391694  | 30835/10332/3383/4057/5818                                                                                                    | 5      |
| B<br>P | GO:00<br>90197 | positive<br>regulation of<br>chemokine<br>secretion     | 5/926      | 15/17913      | 0.<br>00<br>07<br>09<br>87<br>7 | 0.<br>00<br>53<br>07<br>32<br>2 | 0.00391694  | 199/1436/9173/90865/4023                                                                                                      | 5      |
| B<br>P | GO:20<br>00484 | positive<br>regulation of<br>interleukin-8<br>secretion | 5/926      | 15/17913      | 0.<br>00<br>07<br>09<br>87<br>7 | 0.<br>00<br>53<br>07<br>32<br>2 | 0.00391694  | 929/914/2219/7096/7097                                                                                                        | 5      |
| B<br>P | GO:00<br>30890 | positive<br>regulation of<br>B cell<br>proliferation    | 8/926      | 39/17913      | 0.<br>00<br>07<br>27<br>51<br>4 | 0.<br>00<br>54<br>31<br>17<br>5 | 0.004008347 | 100/952/972/115352/1880/3071/5788/10673                                                                                       | 8      |
| B<br>P | GO:00<br>07160 | cell-matrix<br>adhesion                                 | 23/92<br>6 | 214/1791<br>3 | 0.<br>00<br>07<br>29<br>92<br>2 | 0.<br>00<br>54<br>41<br>13<br>6 | 0.004015699 | 56999/4059/6366/1236/948/916/960/10225/1021/55612/342<br>184/3675/3676/3683/3689/3691/3897/4321/64098/6281/661<br>4/7412/7422 | 2<br>3 |
| B<br>P | GO:00<br>14065 | phosphatidy<br>linositol<br>3-kinase<br>signaling       | 17/92<br>6 | 138/1791<br>3 | 0.<br>00<br>07<br>71<br>70      | 0.<br>00<br>57<br>44<br>18      | 0.004239359 | 6352/940/1906/2322/3059/653361/197358/118788/5293/529<br>4/23533/8395/26051/10125/5649/6403/6662                              | 1<br>7 |

|        |                |                                                          |            |               |                                 |                                 |             |                                                                                                                                                                                                                                        |        |
|--------|----------------|----------------------------------------------------------|------------|---------------|---------------------------------|---------------------------------|-------------|----------------------------------------------------------------------------------------------------------------------------------------------------------------------------------------------------------------------------------------|--------|
|        |                |                                                          |            |               | 9                               | 9                               |             |                                                                                                                                                                                                                                        |        |
| B<br>P | GO:00<br>06958 | complement<br>activation,<br>classical<br>pathway        | 13/92<br>6 | 91/17913      | 0.<br>00<br>07<br>85<br>25<br>7 | 0.<br>00<br>58<br>36<br>46<br>6 | 0.004307462 | 712/713/714/717/718/720/721/730/3426/1378/1380/710/550<br>61                                                                                                                                                                           | 1<br>3 |
| B<br>P | GO:00<br>31529 | ruffle<br>organization                                   | 9/926      | 49/17913      | 0.<br>00<br>08<br>04<br>96<br>6 | 0.<br>00<br>59<br>74<br>19<br>1 | 0.004409107 | 199/146206/6366/1236/23242/1436/3383/5341/26228                                                                                                                                                                                        | 9      |
| B<br>P | GO:00<br>48568 | embryonic<br>organ<br>developmen<br>t                    | 37/92<br>6 | 413/1791<br>3 | 0.<br>00<br>08<br>31<br>01<br>4 | 0.<br>00<br>61<br>58<br>49<br>3 | 0.004545127 | 100/655/50515/23242/3576/1749/79733/1906/8320/2048/22<br>01/2709/79977/3215/3216/3218/3481/3856/26018/4647/801<br>3/9423/5079/113026/639/9750/860/6535/84189/9021/6662/6<br>4220/6899/8463/7020/7054/7422                              | 3<br>7 |
| B<br>P | GO:00<br>07605 | sensory<br>perception<br>of sound                        | 17/92<br>6 | 139/1791<br>3 | 0.<br>00<br>08<br>37<br>90<br>7 | 0.<br>00<br>62<br>00<br>50<br>9 | 0.004576136 | 84059/57214/53405/1285/3383/26018/4647/89797/9750/650<br>7/375611/84189/6899/7020/7054/7068/7399                                                                                                                                       | 1<br>7 |
| B<br>P | GO:00<br>02724 | regulation of<br>T cell<br>cytokine<br>production        | 7/926      | 31/17913      | 0.<br>00<br>08<br>50<br>93<br>9 | 0.<br>00<br>62<br>87<br>77<br>2 | 0.004640537 | 729230/3134/3553/3569/114548/91543/54440                                                                                                                                                                                               | 7      |
| B<br>P | GO:00<br>10975 | regulation of<br>neuron<br>projection<br>developmen<br>t | 40/92<br>6 | 458/1791<br>3 | 0.<br>00<br>08<br>55<br>88<br>5 | 0.<br>00<br>63<br>15<br>11<br>1 | 0.004660715 | 389658/27063/348/655/952/23242/7852/1630/2048/23105/2<br>3426/3675/3792/5653/3897/23566/4038/120892/4139/4804/<br>4897/9423/10439/5063/5365/55607/5800/5649/5979/56963/<br>5997/6091/10371/6696/80725/51760/23043/347733/7422/98<br>39 | 4<br>0 |

|        |                |                                                                                        |            |               |                                 |                                 |             |                                                                                                    |        |
|--------|----------------|----------------------------------------------------------------------------------------|------------|---------------|---------------------------------|---------------------------------|-------------|----------------------------------------------------------------------------------------------------|--------|
| B<br>P | GO:00<br>02369 | T cell<br>cytokine<br>production                                                       | 8/926      | 40/17913      | 0.<br>00<br>08<br>68<br>74<br>8 | 0.<br>00<br>63<br>91<br>41<br>4 | 0.004717028 | 729230/3134/3553/3569/114548/91543/54440/6556                                                      | 8      |
| B<br>P | GO:19<br>02893 | regulation of<br>pri-miRNA<br>transcription<br>by RNA<br>polymerase<br>II              | 8/926      | 40/17913      | 0.<br>00<br>08<br>68<br>74<br>8 | 0.<br>00<br>63<br>91<br>41<br>4 | 0.004717028 | 8862/3725/688/11006/4781/4804/6662/6688                                                            | 8      |
| B<br>P | GO:00<br>34767 | positive<br>regulation of<br>ion<br>transmembr<br>ane<br>transport                     | 18/92<br>6 | 152/1791<br>3 | 0.<br>00<br>08<br>76<br>44<br>5 | 0.<br>00<br>64<br>29<br>37<br>5 | 0.004745045 | 5243/6347/729230/930/57214/3627/6373/4283/2048/3359/9<br>722/5027/5031/5649/6622/6769/342667/54209 | 1<br>8 |
| B<br>P | GO:19<br>03707 | negative<br>regulation of<br>hemopoiesi<br>s                                           | 18/92<br>6 | 152/1791<br>3 | 0.<br>00<br>08<br>76<br>44<br>5 | 0.<br>00<br>64<br>29<br>37<br>5 | 0.004745045 | 301/714/6348/972/1021/1493/2213/29909/8361/3218/3718/3<br>902/10859/11006/4057/55365/28959/7538    | 1<br>8 |
| B<br>P | GO:00<br>60143 | positive<br>regulation of<br>syncytium<br>formation by<br>plasma<br>membrane<br>fusion | 6/926      | 23/17913      | 0.<br>00<br>08<br>87<br>47<br>8 | 0.<br>00<br>64<br>91<br>52<br>6 | 0.004790913 | 575/963/4283/9750/54209/7305                                                                       | 6      |
| B<br>P | GO:00<br>71677 | positive<br>regulation of<br>mononuclea<br>r cell<br>migration                         | 6/926      | 23/17913      | 0.<br>00<br>08<br>87<br>47<br>8 | 0.<br>00<br>64<br>91<br>52<br>6 | 0.004790913 | 199/6352/729230/3627/2358/7941                                                                     | 6      |

|        |                |                                                                                |            |               |                                 |                                 |             |                                                                                                        |        |
|--------|----------------|--------------------------------------------------------------------------------|------------|---------------|---------------------------------|---------------------------------|-------------|--------------------------------------------------------------------------------------------------------|--------|
| B<br>P | GO:00<br>14068 | positive<br>regulation of<br>phosphatidy<br>linositol<br>3-kinase<br>signaling | 12/92<br>6 | 81/17913      | 0.<br>00<br>08<br>89<br>81<br>3 | 0.<br>00<br>64<br>99<br>22<br>4 | 0.004796595 | 6352/940/2322/3059/653361/118788/5293/5294/23533/5649<br>/6403/6662                                    | 1<br>2 |
| B<br>P | GO:00<br>60538 | skeletal<br>muscle<br>organ<br>developmen<br>t                                 | 19/92<br>6 | 165/1791<br>3 | 0.<br>00<br>08<br>99<br>96<br>2 | 0.<br>00<br>65<br>63<br>89<br>5 | 0.004844324 | 467/50937/1134/1310/56603/1958/1959/8320/2817/9734/59<br>269/3792/688/4868/26471/5079/9750/64220/6899  | 1<br>9 |
| B<br>P | GO:19<br>05517 | macrophage<br>migration                                                        | 9/926      | 50/17913      | 0.<br>00<br>09<br>37<br>34<br>9 | 0.<br>00<br>68<br>26<br>75<br>6 | 0.005038322 | 719/728/6347/6348/6352/729230/56833/26228/54209                                                        | 9      |
| B<br>P | GO:00<br>44070 | regulation of<br>anion<br>transport                                            | 13/92<br>6 | 93/17913      | 0.<br>00<br>09<br>66<br>83<br>9 | 0.<br>00<br>70<br>21<br>84<br>9 | 0.005182306 | 5243/5244/348/10396/1906/3553/8564/5027/5997/6098/662<br>2/6812/8600                                   | 1<br>3 |
| B<br>P | GO:00<br>31345 | negative<br>regulation of<br>cell<br>projection<br>organization                | 19/92<br>6 | 166/1791<br>3 | 0.<br>00<br>09<br>68<br>29<br>2 | 0.<br>00<br>70<br>21<br>84<br>9 | 0.005182306 | 348/6366/952/1630/2048/23105/2904/3675/4038/120892/41<br>17/4804/9423/5365/5800/56963/10371/6696/26228 | 1<br>9 |
| B<br>P | GO:00<br>51262 | protein<br>tetramerizati<br>on                                                 | 19/92<br>6 | 166/1791<br>3 | 0.<br>00<br>09<br>68<br>29<br>2 | 0.<br>00<br>70<br>21<br>84<br>9 | 0.005182306 | 6352/919/972/973/978/115362/2904/8356/8361/4038/931/62<br>81/375611/6622/6648/6999/8626/80036/140803   | 1<br>9 |
| B      | GO:00          | neutrophil                                                                     | 5/926      | 16/17913      | 0.                              | 0.                              | 0.005254816 | 301/729230/3569/5142/5293                                                                              | 5      |



|        |                |                                                       |        |           |                                 |                                 |             |                                                                                      |        |
|--------|----------------|-------------------------------------------------------|--------|-----------|---------------------------------|---------------------------------|-------------|--------------------------------------------------------------------------------------|--------|
| P      | 01780          | homeostasis                                           |        |           | 00<br>09<br>88<br>86<br>4       | 00<br>71<br>20<br>09<br>9       |             |                                                                                      |        |
| B<br>P | GO:00<br>02295 | T-helper cell lineage commitment                      | 5/926  | 16/17913  | 0.<br>00<br>09<br>88<br>86<br>4 | 0.<br>00<br>71<br>20<br>09<br>9 | 0.005254816 | 3594/3569/3662/4063/114836                                                           | 5      |
| B<br>P | GO:00<br>06957 | complement activation, alternative pathway            | 5/926  | 16/17913  | 0.<br>00<br>09<br>88<br>86<br>4 | 0.<br>00<br>71<br>20<br>09<br>9 | 0.005254816 | 718/730/629/1378/11326                                                               | 5      |
| B<br>P | GO:00<br>10934 | macrophage cytokine production                        | 5/926  | 16/17913  | 0.<br>00<br>09<br>88<br>86<br>4 | 0.<br>00<br>71<br>20<br>09<br>9 | 0.005254816 | 948/972/51704/11213/10859                                                            | 5      |
| B<br>P | GO:00<br>34116 | positive regulation of heterotypic cell-cell adhesion | 5/926  | 16/17913  | 0.<br>00<br>09<br>88<br>86<br>4 | 0.<br>00<br>71<br>20<br>09<br>9 | 0.005254816 | 655/960/2651/3553/3932                                                               | 5      |
| B<br>P | GO:00<br>30833 | regulation of actin filament polymerization           | 16/926 | 129/17913 | 0.<br>00<br>10<br>11<br>39      | 0.<br>00<br>72<br>71<br>96<br>9 | 0.005366901 | 119/274/146206/6366/1236/11151/342184/3055/3059/3383/10788/3071/4868/5063/55607/7454 | 1<br>6 |
| B<br>P | GO:00<br>14002 | astrocyte development                                 | 8/926  | 41/17913  | 0.<br>00                        | 0.<br>00                        | 0.005463994 | 712/728/1021/2358/3553/3569/6279/54209                                               | 8      |

|        |                |                                                      |            |               |                                 |                                 |             |                                                                                                                                                      |        |
|--------|----------------|------------------------------------------------------|------------|---------------|---------------------------------|---------------------------------|-------------|------------------------------------------------------------------------------------------------------------------------------------------------------|--------|
|        |                | t                                                    |            |               | 10<br>31<br>14<br>8             | 74<br>03<br>52<br>8             |             |                                                                                                                                                      |        |
| B<br>P | GO:00<br>01975 | response to<br>amphetamine                           | 7/926      | 32/17913      | 0.<br>00<br>10<br>41<br>19<br>5 | 0.<br>00<br>74<br>65<br>08<br>9 | 0.005509428 | 2903/9734/3383/4929/26575/5997/7054                                                                                                                  | 7      |
| B<br>P | GO:00<br>10952 | positive<br>regulation of<br>peptidase<br>activity   | 20/92<br>6 | 180/1791<br>3 | 0.<br>00<br>10<br>46<br>62<br>6 | 0.<br>00<br>74<br>93<br>43      | 0.005530344 | 9447/1285/1378/26999/112399/2152/355/2903/2904/3428/3932/4210/4804/22861/114548/26577/64065/6091/6279/6622                                           | 2<br>0 |
| B<br>P | GO:00<br>45778 | positive<br>regulation of<br>ossification            | 13/92<br>6 | 94/17913      | 0.<br>00<br>10<br>70<br>04<br>7 | 0.<br>00<br>76<br>46<br>34<br>4 | 0.005643199 | 84059/655/2201/54857/3400/8519/3569/4057/4745/5027/860/7020/8626                                                                                     | 1<br>3 |
| B<br>P | GO:00<br>32147 | activation of<br>protein<br>kinase<br>activity       | 29/92<br>6 | 303/1791<br>3 | 0.<br>00<br>10<br>71<br>00<br>1 | 0.<br>00<br>76<br>46<br>34<br>4 | 0.005643199 | 107/113/150/728/6363/6352/972/1116/7852/10595/2357/51704/3553/23566/120892/11184/3071/64127/3084/5027/5063/5577/5788/5979/6556/10333/8600/23043/7422 | 2<br>9 |
| B<br>P | GO:00<br>01954 | positive<br>regulation of<br>cell-matrix<br>adhesion | 9/926      | 51/17913      | 0.<br>00<br>10<br>86<br>85<br>7 | 0.<br>00<br>77<br>16<br>07<br>9 | 0.005694665 | 6366/1236/948/916/1021/55612/342184/6281/7422                                                                                                        | 9      |
| B<br>P | GO:00<br>06584 | catecholami<br>ne<br>metabolic                       | 9/926      | 51/17913      | 0.<br>00<br>10                  | 0.<br>00<br>77                  | 0.005694665 | 2903/3684/3689/4129/4929/6622/9627/6799/7054                                                                                                         | 9      |

|        |                |                                                                        |            |               |                                 |                                 |             |                                                                                                          |        |
|--------|----------------|------------------------------------------------------------------------|------------|---------------|---------------------------------|---------------------------------|-------------|----------------------------------------------------------------------------------------------------------|--------|
|        |                | process                                                                |            |               | 86<br>85<br>7                   | 16<br>07<br>9                   |             |                                                                                                          |        |
| B<br>P | GO:00<br>09712 | catechol-co<br>ntaining<br>compound<br>metabolic<br>process            | 9/926      | 51/17913      | 0.<br>00<br>10<br>86<br>85<br>7 | 0.<br>00<br>77<br>16<br>07<br>9 | 0.005694665 | 2903/3684/3689/4129/4929/6622/9627/6799/7054                                                             | 9      |
| B<br>P | GO:00<br>21545 | cranial<br>nerve<br>developmen<br>t                                    | 9/926      | 51/17913      | 0.<br>00<br>10<br>86<br>85<br>7 | 0.<br>00<br>77<br>16<br>07<br>9 | 0.005694665 | 1959/2048/3213/89797/10371/6507/84189/6899/7020                                                          | 9      |
| B<br>P | GO:20<br>00377 | regulation of<br>reactive<br>oxygen<br>species<br>metabolic<br>process | 21/92<br>6 | 194/1791<br>3 | 0.<br>00<br>11<br>11<br>52<br>5 | 0.<br>00<br>78<br>80<br>17      | 0.005815769 | 54/575/199/384/655/948/1906/2358/3099/3383/3553/3684/3<br>689/9722/5806/5880/140885/6622/7020/10333/7305 | 2<br>1 |
| B<br>P | GO:00<br>02861 | regulation of<br>inflammator<br>y response<br>to antigenic<br>stimulus | 6/926      | 24/17913      | 0.<br>00<br>11<br>32<br>06<br>4 | 0.<br>00<br>79<br>81<br>13      | 0.00589028  | 695/718/1236/940/2207/2213                                                                               | 6      |
| B<br>P | GO:00<br>34162 | toll-like<br>receptor 9<br>signaling<br>pathway                        | 6/926      | 24/17913      | 0.<br>00<br>11<br>32<br>06<br>4 | 0.<br>00<br>79<br>81<br>13      | 0.00589028  | 115352/84868/118788/91543/51284/51311                                                                    | 6      |
| B<br>P | GO:00<br>45954 | positive<br>regulation of<br>natural killer<br>cell                    | 6/926      | 24/17913      | 0.<br>00<br>11<br>32            | 0.<br>00<br>79<br>81            | 0.00589028  | 3134/3902/10125/4068/114836/7409                                                                         | 6      |

|        |                |                                                            |       |          |                                 |                                 |             |                              |   |
|--------|----------------|------------------------------------------------------------|-------|----------|---------------------------------|---------------------------------|-------------|------------------------------|---|
|        |                | mediated cytotoxicity                                      |       |          | 06<br>4                         | 13                              |             |                              |   |
| B<br>P | GO:00<br>48143 | astrocyte activation                                       | 6/926 | 24/17913 | 0.<br>00<br>11<br>32<br>06<br>4 | 0.<br>00<br>79<br>81<br>13      | 0.00589028  | 712/728/2358/3553/3569/54209 | 6 |
| B<br>P | GO:00<br>02664 | regulation of T cell tolerance induction                   | 4/926 | 10/17913 | 0.<br>00<br>11<br>59<br>36      | 0.<br>00<br>80<br>82<br>19<br>2 | 0.005964866 | 916/3620/3559/10288          | 4 |
| B<br>P | GO:00<br>02887 | negative regulation of myeloid leukocyte mediated immunity | 4/926 | 10/17913 | 0.<br>00<br>11<br>59<br>36      | 0.<br>00<br>80<br>82<br>19<br>2 | 0.005964866 | 729230/8832/2213/3162        | 4 |
| B<br>P | GO:00<br>19062 | virion attachment to host cell                             | 4/926 | 10/17913 | 0.<br>00<br>11<br>59<br>36      | 0.<br>00<br>80<br>82<br>19<br>2 | 0.005964866 | 30835/10332/3383/5818        | 4 |
| B<br>P | GO:00<br>32308 | positive regulation of prostaglandin secretion             | 4/926 | 10/17913 | 0.<br>00<br>11<br>59<br>36      | 0.<br>00<br>80<br>82<br>19<br>2 | 0.005964866 | 1906/3553/5027/8600          | 4 |
| B<br>P | GO:00<br>32621 | interleukin-18 production                                  | 4/926 | 10/17913 | 0.<br>00<br>11<br>59<br>36      | 0.<br>00<br>80<br>82<br>19      | 0.005964866 | 8832/115362/114548/7097      | 4 |

|        |                |                                                                 |            |               |                                 |                                 |             |                                                                                                                                                                                               |        |
|--------|----------------|-----------------------------------------------------------------|------------|---------------|---------------------------------|---------------------------------|-------------|-----------------------------------------------------------------------------------------------------------------------------------------------------------------------------------------------|--------|
|        |                |                                                                 |            |               |                                 | 2                               |             |                                                                                                                                                                                               |        |
| B<br>P | GO:00<br>45625 | regulation of<br>T-helper 1<br>cell<br>differentiation          | 4/926      | 10/17913      | 0.<br>00<br>11<br>59<br>36      | 0.<br>00<br>80<br>82<br>19<br>2 | 0.005964866 | 301/6363/941/3718                                                                                                                                                                             | 4      |
| B<br>P | GO:00<br>70391 | response to<br>lipoteichoic<br>acid                             | 4/926      | 10/17913      | 0.<br>00<br>11<br>59<br>36      | 0.<br>00<br>80<br>82<br>19<br>2 | 0.005964866 | 929/948/7097/54209                                                                                                                                                                            | 4      |
| B<br>P | GO:00<br>71223 | cellular<br>response to<br>lipoteichoic<br>acid                 | 4/926      | 10/17913      | 0.<br>00<br>11<br>59<br>36      | 0.<br>00<br>80<br>82<br>19<br>2 | 0.005964866 | 929/948/7097/54209                                                                                                                                                                            | 4      |
| B<br>P | GO:00<br>31346 | positive<br>regulation of<br>cell<br>projection<br>organization | 33/92<br>6 | 362/1791<br>3 | 0.<br>00<br>11<br>60<br>74<br>9 | 0.<br>00<br>80<br>82<br>19<br>2 | 0.005964866 | 389658/27063/348/655/146206/6363/6366/1236/23242/7852<br>/139818/5168/23426/3675/3897/23566/4804/9423/5027/506<br>3/26499/5365/55607/5880/5649/5979/5997/9750/6091/5176<br>0/347733/7422/9839 | 3<br>3 |
| B<br>P | GO:00<br>07519 | skeletal<br>muscle<br>tissue<br>developmen<br>t                 | 18/92<br>6 | 156/1791<br>3 | 0.<br>00<br>11<br>86<br>07<br>1 | 0.<br>00<br>82<br>47<br>17<br>8 | 0.00608663  | 467/50937/1134/1310/56603/1958/1959/8320/2817/9734/59<br>269/3792/688/4868/26471/5079/9750/6899                                                                                               | 1<br>8 |
| B<br>P | GO:00<br>48167 | regulation of<br>synaptic<br>plasticity                         | 19/92<br>6 | 169/1791<br>3 | 0.<br>00<br>12<br>00<br>55<br>6 | 0.<br>00<br>83<br>36<br>46<br>1 | 0.006152523 | 107/575/348/952/1959/2048/2903/2904/3274/10288/79772/2<br>7065/55607/5649/22941/6622/6812/91683/7305                                                                                          | 1<br>9 |

|        |                |                                                                                              |            |               |                                 |                                 |             |                                                                                                                                                                                                         |        |
|--------|----------------|----------------------------------------------------------------------------------------------|------------|---------------|---------------------------------|---------------------------------|-------------|---------------------------------------------------------------------------------------------------------------------------------------------------------------------------------------------------------|--------|
| B<br>P | GO:00<br>48732 | gland<br>developmen<br>t                                                                     | 37/92<br>6 | 422/1791<br>3 | 0.<br>00<br>12<br>27<br>13<br>6 | 0.<br>00<br>85<br>09<br>37<br>5 | 0.006280138 | 100/8862/374/9914/655/999/23242/1396/1436/79733/2099/3<br>099/3162/3213/3274/3400/3481/3664/3725/284217/4478/47<br>81/3084/9423/4939/6091/10371/5268/6662/64220/6899/298<br>42/7052/7128/8600/8626/7422 | 3<br>7 |
| B<br>P | GO:00<br>30838 | positive<br>regulation of<br>actin<br>filament<br>polymerizati<br>on                         | 12/92<br>6 | 84/17913      | 0.<br>00<br>12<br>34<br>01<br>7 | 0.<br>00<br>85<br>45<br>4       | 0.006306726 | 274/146206/6366/1236/11151/342184/3055/3383/10788/307<br>1/4868/7454                                                                                                                                    | 1<br>2 |
| B<br>P | GO:00<br>50804 | modulation<br>of chemical<br>synaptic<br>transmissio<br>n                                    | 35/92<br>6 | 393/1791<br>3 | 0.<br>00<br>12<br>56<br>6       | 0.<br>00<br>86<br>89<br>90<br>9 | 0.006413377 | 107/575/321/348/8938/6347/729230/952/999/1630/1906/195<br>9/2048/2903/2904/3274/3553/8564/10288/120892/79772/27<br>065/23228/55607/5577/5579/5649/22941/6507/6622/9627/6<br>812/91683/347733/7305       | 3<br>5 |
| B<br>P | GO:00<br>45589 | regulation of<br>regulatory T<br>cell<br>differentiatio<br>n                                 | 7/926      | 33/17913      | 0.<br>00<br>12<br>63<br>32<br>1 | 0.<br>00<br>87<br>12<br>62      | 0.006430138 | 940/1378/1493/3559/3902/10288/11006                                                                                                                                                                     | 7      |
| B<br>P | GO:00<br>55094 | response to<br>lipoprotein<br>particle                                                       | 7/926      | 33/17913      | 0.<br>00<br>12<br>63<br>32<br>1 | 0.<br>00<br>87<br>12<br>62      | 0.006430138 | 84830/348/948/2207/3689/4023/10333                                                                                                                                                                      | 7      |
| B<br>P | GO:00<br>43281 | regulation of<br>cysteine-typ<br>e<br>endopeptida<br>se activity<br>involved in<br>apoptotic | 21/92<br>6 | 196/1791<br>3 | 0.<br>00<br>12<br>66<br>08<br>5 | 0.<br>00<br>87<br>19<br>81<br>7 | 0.00643545  | 939/960/1285/1800/112399/2152/355/2537/27074/3932/431<br>8/4804/22861/114548/5329/6091/6279/5272/6622/8626/742<br>2                                                                                     | 2<br>1 |

|        |                |                                                                   |            |               |                                 |                                 |             |                                                                                                                                                                                                                                 |        |
|--------|----------------|-------------------------------------------------------------------|------------|---------------|---------------------------------|---------------------------------|-------------|---------------------------------------------------------------------------------------------------------------------------------------------------------------------------------------------------------------------------------|--------|
|        |                | process                                                           |            |               |                                 |                                 |             |                                                                                                                                                                                                                                 |        |
| B<br>P | GO:00<br>09991 | response to<br>extracellular<br>stimulus                          | 42/92<br>6 | 498/1791<br>3 | 0.<br>00<br>12<br>76<br>75<br>7 | 0.<br>00<br>87<br>81<br>38<br>5 | 0.006480889 | 100/122622/199/249/348/467/655/717/916/3627/1536/56603<br>/1824/355/2350/2729/3162/3383/3428/3553/3676/3725/5753<br>5/4023/120892/4316/64127/4929/5027/5029/5251/10891/57<br>88/58528/143686/6581/6513/6696/7054/4982/7412/7538 | 4<br>2 |
| B<br>P | GO:00<br>60759 | regulation of<br>response to<br>cytokine<br>stimulus              | 20/92<br>6 | 183/1791<br>3 | 0.<br>00<br>12<br>83<br>34<br>8 | 0.<br>00<br>88<br>14<br>75<br>6 | 0.006505517 | 330/6352/972/1906/3304/7850/3569/11213/3977/4321/8416<br>6/11240/5788/6091/9021/26228/7097/7128/54209/7294                                                                                                                      | 2<br>0 |
| B<br>P | GO:00<br>01959 | regulation of<br>cytokine-me<br>diated<br>signaling<br>pathway    | 19/92<br>6 | 170/1791<br>3 | 0.<br>00<br>12<br>87<br>84<br>8 | 0.<br>00<br>88<br>33<br>69<br>7 | 0.006519496 | 330/6352/972/1906/3304/7850/3569/11213/3977/4321/8416<br>6/11240/5788/6091/9021/26228/7128/54209/7294                                                                                                                           | 1<br>9 |
| B<br>P | GO:00<br>30282 | bone<br>mineralizati<br>on                                        | 14/92<br>6 | 108/1791<br>3 | 0.<br>00<br>13<br>31<br>45      | 0.<br>00<br>91<br>20<br>43<br>6 | 0.006731117 | 84059/655/6348/2201/2261/10457/4057/4745/5027/5251/66<br>62/5552/7020/7286                                                                                                                                                      | 1<br>4 |
| B<br>P | GO:00<br>21783 | preganglioni<br>c<br>parasympat<br>hetic fiber<br>developmen<br>t | 5/926      | 17/17913      | 0.<br>00<br>13<br>41<br>70<br>4 | 0.<br>00<br>91<br>41<br>25<br>8 | 0.006746484 | 1959/89797/10371/6899/7020                                                                                                                                                                                                      | 5      |
| B<br>P | GO:00<br>32740 | positive<br>regulation of<br>interleukin-1<br>7 production        | 5/926      | 17/17913      | 0.<br>00<br>13<br>41<br>70<br>4 | 0.<br>00<br>91<br>41<br>25<br>8 | 0.006746484 | 3569/4063/64127/5588/114836                                                                                                                                                                                                     | 5      |

|        |                |                                                                                          |       |          |                                 |                                 |             |                                            |   |
|--------|----------------|------------------------------------------------------------------------------------------|-------|----------|---------------------------------|---------------------------------|-------------|--------------------------------------------|---|
| B<br>P | GO:00<br>43373 | CD4-positiv<br>e,<br>alpha-beta T<br>cell lineage<br>commitment                          | 5/926 | 17/17913 | 0.<br>00<br>13<br>41<br>70<br>4 | 0.<br>00<br>91<br>41<br>25<br>8 | 0.006746484 | 3594/3569/3662/4063/114836                 | 5 |
| B<br>P | GO:19<br>03975 | regulation of<br>glial cell<br>migration                                                 | 5/926 | 17/17913 | 0.<br>00<br>13<br>41<br>70<br>4 | 0.<br>00<br>91<br>41<br>25<br>8 | 0.006746484 | 6348/729230/1880/26228/54209               | 5 |
| B<br>P | GO:00<br>02719 | negative<br>regulation of<br>cytokine<br>production<br>involved in<br>immune<br>response | 6/926 | 25/17913 | 0.<br>00<br>14<br>25<br>12<br>6 | 0.<br>00<br>96<br>70<br>63<br>1 | 0.007137175 | 10225/3134/3162/11213/3718/10859           | 6 |
| B<br>P | GO:00<br>32616 | interleukin-1<br>3 production                                                            | 6/926 | 25/17913 | 0.<br>00<br>14<br>25<br>12<br>6 | 0.<br>00<br>96<br>70<br>63<br>1 | 0.007137175 | 384/3556/90865/3662/353514/114548          | 6 |
| B<br>P | GO:00<br>60384 | innervation                                                                              | 6/926 | 25/17913 | 0.<br>00<br>14<br>25<br>12<br>6 | 0.<br>00<br>96<br>70<br>63<br>1 | 0.007137175 | 3676/26018/5979/10371/84189/7412           | 6 |
| B<br>P | GO:00<br>43616 | keratinocyte<br>proliferation                                                            | 8/926 | 43/17913 | 0.<br>00<br>14<br>28<br>40<br>5 | 0.<br>00<br>96<br>79<br>92<br>4 | 0.007144033 | 374/135228/83481/2069/55612/3664/8626/7538 | 8 |



|        |                |                                                                            |            |               |                                 |                                 |             |                                                                                                                      |        |
|--------|----------------|----------------------------------------------------------------------------|------------|---------------|---------------------------------|---------------------------------|-------------|----------------------------------------------------------------------------------------------------------------------|--------|
| B<br>P | GO:00<br>50954 | sensory<br>perception<br>of<br>mechanical<br>stimulus                      | 18/92<br>6 | 159/1791<br>3 | 0.<br>00<br>14<br>75<br>36<br>3 | 0.<br>00<br>99<br>84<br>80<br>3 | 0.007369042 | 84059/57214/53405/1285/7852/3383/26018/4647/89797/975<br>0/6507/375611/84189/6899/7020/7054/7068/7399                | 1<br>8 |
| B<br>P | GO:00<br>10574 | regulation of<br>vascular<br>endothelial<br>growth<br>factor<br>production | 7/926      | 34/17913      | 0.<br>00<br>15<br>20<br>85<br>5 | 0.<br>01<br>02<br>51<br>61<br>4 | 0.007565955 | 718/719/728/147372/729230/3553/3569                                                                                  | 7      |
| B<br>P | GO:00<br>32660 | regulation of<br>interleukin-1<br>7 production                             | 7/926      | 34/17913      | 0.<br>00<br>15<br>20<br>85<br>5 | 0.<br>01<br>02<br>51<br>61<br>4 | 0.007565955 | 384/3569/4063/3071/64127/5588/114836                                                                                 | 7      |
| B<br>P | GO:00<br>32735 | positive<br>regulation of<br>interleukin-1<br>2 production                 | 7/926      | 34/17913      | 0.<br>00<br>15<br>20<br>85<br>5 | 0.<br>01<br>02<br>51<br>61<br>4 | 0.007565955 | 6363/1236/948/3620/3394/4050/7097                                                                                    | 7      |
| B<br>P | GO:00<br>02064 | epithelial<br>cell<br>developmen<br>t                                      | 21/92<br>6 | 199/1791<br>3 | 0.<br>00<br>15<br>32<br>26<br>2 | 0.<br>01<br>03<br>14<br>78<br>7 | 0.007612579 | 54507/1021/7852/2099/79977/3274/3383/3553/688/4478/46<br>47/4868/26051/639/9750/6098/57619/84189/6662/29842/86<br>26 | 2<br>1 |
| B<br>P | GO:00<br>00187 | activation of<br>MAPK<br>activity                                          | 17/92<br>6 | 147/1791<br>3 | 0.<br>00<br>15<br>64<br>26<br>1 | 0.<br>01<br>04<br>92<br>51<br>4 | 0.007743746 | 728/6363/972/7852/10595/2357/3553/23566/120892/11184/<br>64127/3084/5027/5063/5788/5979/8600                         | 1<br>7 |
| B      | GO:00          | regulation of                                                              | 17/92      | 147/1791      | 0.                              | 0.                              | 0.007743746 | 119/274/146206/6366/1236/11151/342184/3055/3059/3383/                                                                | 1      |

|        |            |                                                                                  |        |           |            |             |             |                                                                                                                        |        |
|--------|------------|----------------------------------------------------------------------------------|--------|-----------|------------|-------------|-------------|------------------------------------------------------------------------------------------------------------------------|--------|
| P      | 08064      | actin polymerization or depolymerization                                         | 6      | 3         | 001564261  | 010492514   |             | 10788/3071/4868/5063/5341/55607/7454                                                                                   | 7      |
| B<br>P | GO:0006919 | activation of cysteine-type endopeptidase activity involved in apoptotic process | 11/926 | 75/17913  | 0001564873 | 00010492514 | 0.007743746 | 1285/112399/2152/355/3932/4804/22861/114548/6091/6279/6622                                                             | 1<br>1 |
| B<br>P | GO:0033559 | unsaturated fatty acid metabolic process                                         | 13/926 | 98/17913  | 0001579464 | 00010576356 | 0.007805623 | 241/972/1557/1573/8560/1906/6785/2171/3553/5730/5742/79966/6916                                                        | 1<br>3 |
| B<br>P | GO:0048015 | phosphatidylinositol-mediated signaling                                          | 18/926 | 160/17913 | 0001584188 | 00010593994 | 0.007818641 | 6352/940/1436/1906/2322/3059/653361/197358/118788/5293/5294/23533/8395/26051/10125/5649/6403/6662                      | 1<br>8 |
| B<br>P | GO:0038093 | Fc receptor signaling pathway                                                    | 24/926 | 241/17913 | 0001639338 | 00010948362 | 0.008080173 | 695/919/917/26999/9844/2207/2209/2212/2213/2214/3055/3702/3725/3937/64005/3071/8013/5588/5696/5698/5788/7409/7454/7456 | 2<br>4 |
| B<br>P | GO:0032715 | negative regulation of interleukin-6 production                                  | 9/926  | 54/17913  | 00016544   | 00011034415 | 0.008143682 | 55024/84868/11213/3071/197358/26191/140885/6504/7128                                                                   | 9      |

|        |                |                                                                             |        |           |                                 |                                 |             |                                                                                                                              |        |
|--------|----------------|-----------------------------------------------------------------------------|--------|-----------|---------------------------------|---------------------------------|-------------|------------------------------------------------------------------------------------------------------------------------------|--------|
| B<br>P | GO:00<br>30225 | macrophage<br>differentiation                                               | 8/926  | 44/17913  | 0.<br>00<br>16<br>68<br>02<br>9 | 0.<br>01<br>10<br>96<br>11<br>7 | 0.00818922  | 714/1436/3059/133396/4318/6688/7097/7422                                                                                     | 8      |
| B<br>P | GO:00<br>48483 | autonomic<br>nervous<br>system<br>development                               | 8/926  | 44/17913  | 0.<br>00<br>16<br>68<br>02<br>9 | 0.<br>01<br>10<br>96<br>11<br>7 | 0.00818922  | 1959/89797/5979/10371/6899/7020/8626/7412                                                                                    | 8      |
| B<br>P | GO:00<br>60560 | developmental growth<br>involved in<br>morphogenesis                        | 22/926 | 214/17913 | 0.<br>00<br>16<br>80<br>20<br>5 | 0.<br>01<br>11<br>58<br>13<br>6 | 0.008234992 | 348/374/23242/7852/26999/1630/9201/2099/342184/23105/<br>3676/3897/23566/4897/9423/10439/10371/6662/6696/51760<br>/7422/9839 | 2<br>2 |
| B<br>P | GO:19<br>03035 | negative<br>regulation of<br>response to<br>wounding                        | 12/926 | 87/17913  | 0.<br>00<br>16<br>81<br>75<br>5 | 0.<br>01<br>11<br>58<br>13<br>6 | 0.008234992 | 84830/348/135228/1906/83481/2811/5329/56963/710/89790<br>/6696/7035                                                          | 1<br>2 |
| B<br>P | GO:00<br>30832 | regulation of<br>actin<br>filament<br>length                                | 17/926 | 148/17913 | 0.<br>00<br>16<br>84<br>36<br>8 | 0.<br>01<br>11<br>60<br>86<br>6 | 0.008237007 | 119/274/146206/6366/1236/11151/342184/3055/3059/3383/<br>10788/3071/4868/5063/5341/55607/7454                                | 1<br>7 |
| B<br>P | GO:00<br>02483 | antigen<br>processing<br>and<br>presentation<br>of<br>endogenous<br>peptide | 4/926  | 11/17913  | 0.<br>00<br>17<br>47<br>62      | 0.<br>01<br>14<br>30<br>56<br>3 | 0.00843605  | 64167/3134/6890/6891                                                                                                         | 4      |

|        |                |                                                                                                    |       |          |                            |                                 |            |                        |   |
|--------|----------------|----------------------------------------------------------------------------------------------------|-------|----------|----------------------------|---------------------------------|------------|------------------------|---|
|        |                | antigen                                                                                            |       |          |                            |                                 |            |                        |   |
| B<br>P | GO:00<br>02638 | negative<br>regulation of<br>immunoglob<br>ulin<br>production                                      | 4/926 | 11/17913 | 0.<br>00<br>17<br>47<br>62 | 0.<br>01<br>14<br>30<br>56<br>3 | 0.00843605 | 933/2213/115352/90865  | 4 |
| B<br>P | GO:00<br>02923 | regulation of<br>humoral<br>immune<br>response<br>mediated by<br>circulating<br>immunoglob<br>ulin | 4/926 | 11/17913 | 0.<br>00<br>17<br>47<br>62 | 0.<br>01<br>14<br>30<br>56<br>3 | 0.00843605 | 1378/2208/2213/5788    | 4 |
| B<br>P | GO:00<br>32306 | regulation of<br>prostaglandi<br>n secretion                                                       | 4/926 | 11/17913 | 0.<br>00<br>17<br>47<br>62 | 0.<br>01<br>14<br>30<br>56<br>3 | 0.00843605 | 1906/3553/5027/8600    | 4 |
| B<br>P | GO:00<br>45793 | positive<br>regulation of<br>cell size                                                             | 4/926 | 11/17913 | 0.<br>00<br>17<br>47<br>62 | 0.<br>01<br>14<br>30<br>56<br>3 | 0.00843605 | 10000/1906/5979/375611 | 4 |
| B<br>P | GO:00<br>72672 | neutrophil<br>extravasatio<br>n                                                                    | 4/926 | 11/17913 | 0.<br>00<br>17<br>47<br>62 | 0.<br>01<br>14<br>30<br>56<br>3 | 0.00843605 | 120425/5293/5294/9750  | 4 |
| B<br>P | GO:00<br>97048 | dendritic cell<br>apoptotic<br>process                                                             | 4/926 | 11/17913 | 0.<br>00<br>17<br>47       | 0.<br>01<br>14<br>30            | 0.00843605 | 6363/6366/1236/10859   | 4 |

|        |                |                                                         |       |          |                                 |                                 |             |                                   |   |
|--------|----------------|---------------------------------------------------------|-------|----------|---------------------------------|---------------------------------|-------------|-----------------------------------|---|
|        |                |                                                         |       |          | 62                              | 56                              |             |                                   |   |
|        |                |                                                         |       |          |                                 | 3                               |             |                                   |   |
| B<br>P | GO:00<br>99188 | postsynaptic<br>cytoskeleton<br>organization            | 4/926 | 11/17913 | 0.<br>00<br>17<br>47<br>62      | 0.<br>01<br>14<br>30<br>56<br>3 | 0.00843605  | 9118/4744/9722/55607              | 4 |
| B<br>P | GO:20<br>00668 | regulation of<br>dendritic cell<br>apoptotic<br>process | 4/926 | 11/17913 | 0.<br>00<br>17<br>47<br>62      | 0.<br>01<br>14<br>30<br>56<br>3 | 0.00843605  | 6363/6366/1236/10859              | 4 |
| B<br>P | GO:20<br>01204 | regulation of<br>osteoclast<br>developmen<br>t          | 4/926 | 11/17913 | 0.<br>00<br>17<br>47<br>62      | 0.<br>01<br>14<br>30<br>56<br>3 | 0.00843605  | 10859/4057/8600/7305              | 4 |
| B<br>P | GO:00<br>48668 | collateral<br>sprouting                                 | 6/926 | 26/17913 | 0.<br>00<br>17<br>72<br>61<br>2 | 0.<br>01<br>15<br>48<br>78      | 0.008523297 | 23242/1630/23105/23566/6696/9839  | 6 |
| B<br>P | GO:00<br>72539 | T-helper 17<br>cell<br>differentiatio<br>n              | 6/926 | 26/17913 | 0.<br>00<br>17<br>72<br>61<br>2 | 0.<br>01<br>15<br>48<br>78      | 0.008523297 | 3594/3569/3662/4063/114548/114836 | 6 |
| B<br>P | GO:00<br>01779 | natural killer<br>cell<br>differentiatio<br>n           | 5/926 | 18/17913 | 0.<br>00<br>17<br>79<br>36      | 0.<br>01<br>15<br>48<br>78      | 0.008523297 | 5293/639/5788/10125/9760          | 5 |

|        |                |                                                                    |            |               |                                 |                                 |             |                                                                                                                                                  |        |
|--------|----------------|--------------------------------------------------------------------|------------|---------------|---------------------------------|---------------------------------|-------------|--------------------------------------------------------------------------------------------------------------------------------------------------|--------|
|        |                |                                                                    |            |               | 4                               |                                 |             |                                                                                                                                                  |        |
| B<br>P | GO:00<br>46641 | positive<br>regulation of<br>alpha-beta T<br>cell<br>proliferation | 5/926      | 18/17913      | 0.<br>00<br>17<br>79<br>36<br>4 | 0.<br>01<br>15<br>48<br>78      | 0.008523297 | 729230/940/916/5788/7535                                                                                                                         | 5      |
| B<br>P | GO:00<br>90196 | regulation of<br>chemokine<br>secretion                            | 5/926      | 18/17913      | 0.<br>00<br>17<br>79<br>36<br>4 | 0.<br>01<br>15<br>48<br>78      | 0.008523297 | 199/1436/9173/90865/4023                                                                                                                         | 5      |
| B<br>P | GO:19<br>01739 | regulation of<br>myoblast<br>fusion                                | 5/926      | 18/17913      | 0.<br>00<br>17<br>79<br>36<br>4 | 0.<br>01<br>15<br>48<br>78      | 0.008523297 | 575/963/3627/4283/9750                                                                                                                           | 5      |
| B<br>P | GO:00<br>42063 | gliogenesis                                                        | 27/92<br>6 | 285/1791<br>3 | 0.<br>00<br>18<br>14<br>12      | 0.<br>01<br>17<br>21<br>25<br>8 | 0.00865059  | 374/274/712/728/6347/6348/729230/1021/1436/7852/1959/2<br>358/2817/1880/3400/3553/90865/3569/10397/4781/3084/56<br>49/6279/6662/26228/7097/54209 | 2<br>7 |
| B<br>P | GO:00<br>48246 | macrophage<br>chemotaxis                                           | 7/926      | 35/17913      | 0.<br>00<br>18<br>17<br>5       | 0.<br>01<br>17<br>21<br>25<br>8 | 0.00865059  | 719/728/6347/6348/6352/56833/26228                                                                                                               | 7      |
| B<br>P | GO:00<br>71402 | cellular<br>response to<br>lipoprotein<br>particle<br>stimulus     | 7/926      | 35/17913      | 0.<br>00<br>18<br>17<br>5       | 0.<br>01<br>17<br>21<br>25<br>8 | 0.00865059  | 84830/348/948/2207/3689/4023/10333                                                                                                               | 7      |

|        |                |                                                     |            |               |                                 |                                 |             |                                                                                                                                                     |        |
|--------|----------------|-----------------------------------------------------|------------|---------------|---------------------------------|---------------------------------|-------------|-----------------------------------------------------------------------------------------------------------------------------------------------------|--------|
| B<br>P | GO:00<br>90322 | regulation of<br>superoxide<br>metabolic<br>process | 7/926      | 35/17913      | 0.<br>00<br>18<br>17<br>5       | 0.<br>01<br>17<br>21<br>25<br>8 | 0.00865059  | 54/655/948/2358/3684/3689/7305                                                                                                                      | 7      |
| B<br>P | GO:20<br>00310 | regulation of<br>NMDA<br>receptor<br>activity       | 7/926      | 35/17913      | 0.<br>00<br>18<br>17<br>5       | 0.<br>01<br>17<br>21<br>25<br>8 | 0.00865059  | 6347/729230/2048/2903/2904/10891/5649                                                                                                               | 7      |
| B<br>P | GO:00<br>51403 | stress-activ<br>ated MAPK<br>cascade                | 26/92<br>6 | 271/1791<br>3 | 0.<br>00<br>18<br>29<br>87<br>8 | 0.<br>01<br>17<br>86<br>09      | 0.008698438 | 6363/6366/1236/939/1843/1906/10595/355/2213/3553/1118<br>4/653361/64127/4868/5187/26191/10125/10371/140885/650<br>4/10333/8600/23043/7422/9839/7538 | 2<br>6 |
| B<br>P | GO:00<br>00302 | response to<br>reactive<br>oxygen<br>species        | 23/92<br>6 | 230/1791<br>3 | 0.<br>00<br>19<br>20<br>49<br>9 | 0.<br>01<br>23<br>54<br>07<br>6 | 0.009117626 | 100/348/374/655/695/6363/1236/948/1800/1843/1906/3162/<br>3569/3725/120892/4318/653361/8013/10891/143686/14088<br>5/6648/7128                       | 2<br>3 |
| B<br>P | GO:00<br>46850 | regulation of<br>bone<br>remodeling                 | 8/926      | 45/17913      | 0.<br>00<br>19<br>38<br>34<br>9 | 0.<br>01<br>24<br>37<br>33<br>1 | 0.009179071 | 952/1436/53832/3569/5027/7128/4982/8600                                                                                                             | 8      |
| B<br>P | GO:00<br>72604 | interleukin-6<br>secretion                          | 8/926      | 45/17913      | 0.<br>00<br>19<br>38<br>34<br>9 | 0.<br>01<br>24<br>37<br>33<br>1 | 0.009179071 | 199/55024/3553/3556/353514/4023/26191/51311                                                                                                         | 8      |
| B      | GO:00          | astrocyte                                           | 11/92      | 77/17913      | 0.                              | 0.                              | 0.009182404 | 274/712/728/1021/2358/3400/3553/3569/6279/6662/54209                                                                                                | 1      |

|        |                |                                                         |            |           |                                 |                                 |             |                                                                                                           |        |
|--------|----------------|---------------------------------------------------------|------------|-----------|---------------------------------|---------------------------------|-------------|-----------------------------------------------------------------------------------------------------------|--------|
| P      | 48708          | differentiation                                         | 6          |           | 00<br>19<br>43<br>96<br>2       | 01<br>24<br>41<br>84<br>8       |             |                                                                                                           | 1      |
| B<br>P | GO:00<br>97061 | dendritic spine organization                            | 11/92<br>6 | 77/17913  | 0.<br>00<br>19<br>43<br>96<br>2 | 0.<br>01<br>24<br>41<br>84<br>8 | 0.009182404 | 348/55619/2048/2213/2904/3675/120892/5063/55607/5649/80725                                                | 1<br>1 |
| B<br>P | GO:00<br>97696 | STAT cascade                                            | 17/92<br>6 | 150/17913 | 0.<br>00<br>19<br>47<br>96<br>4 | 0.<br>01<br>24<br>51<br>74<br>1 | 0.009189706 | 6347/6352/729230/1436/2261/2322/3059/3587/11009/133396/3569/3575/3718/5788/5979/9021/6775                 | 1<br>7 |
| B<br>P | GO:00<br>48017 | inositol lipid-mediated signaling                       | 18/92<br>6 | 163/17913 | 0.<br>00<br>19<br>52<br>21<br>9 | 0.<br>01<br>24<br>63<br>22<br>1 | 0.009198178 | 6352/940/1436/1906/2322/3059/653361/197358/118788/5293/5294/23533/8395/26051/10125/5649/6403/6662         | 1<br>8 |
| B<br>P | GO:00<br>44344 | cellular response to fibroblast growth factor stimulus  | 16/92<br>6 | 138/17913 | 0.<br>00<br>20<br>64<br>74<br>8 | 0.<br>01<br>31<br>65<br>03<br>8 | 0.009716137 | 8862/6347/6352/960/10563/3576/1960/54845/2261/2729/2817/3164/860/6622/6899/7538                           | 1<br>6 |
| B<br>P | GO:00<br>48661 | positive regulation of smooth muscle cell proliferation | 13/92<br>6 | 101/17913 | 0.<br>00<br>20<br>81<br>27<br>8 | 0.<br>01<br>32<br>40<br>72<br>7 | 0.009771998 | 199/6352/1906/2069/1839/3162/3569/3725/4318/8013/5031/10891/7052                                          | 1<br>3 |
| B<br>P | GO:00<br>48705 | skeletal system                                         | 21/92<br>6 | 204/17913 | 0.<br>00                        | 0.<br>01                        | 0.009771998 | 54/249/655/50515/55790/56603/1749/2201/2261/342184/79977/3215/3216/3218/4057/5027/5079/860/6662/6899/7020 | 2<br>1 |



|        |                |                                                                                                                        |            |               |                                 |                                 |             |                                                                                                  |        |
|--------|----------------|------------------------------------------------------------------------------------------------------------------------|------------|---------------|---------------------------------|---------------------------------|-------------|--------------------------------------------------------------------------------------------------|--------|
|        |                | morphogenesis                                                                                                          |            |               | 20<br>81<br>84<br>3             | 32<br>40<br>72<br>7             |             |                                                                                                  |        |
| B<br>P | GO:00<br>10573 | vascular<br>endothelial<br>growth<br>factor<br>production                                                              | 7/926      | 36/17913      | 0.<br>00<br>21<br>57<br>11<br>7 | 0.<br>01<br>36<br>85<br>13<br>7 | 0.010099984 | 718/719/728/147372/729230/3553/3569                                                              | 7      |
| B<br>P | GO:19<br>05521 | regulation of<br>macrophage<br>migration                                                                               | 7/926      | 36/17913      | 0.<br>00<br>21<br>57<br>11<br>7 | 0.<br>01<br>36<br>85<br>13<br>7 | 0.010099984 | 719/728/6348/6352/56833/26228/54209                                                              | 7      |
| B<br>P | GO:00<br>43304 | regulation of<br>mast cell<br>degranulation                                                                            | 6/926      | 27/17913      | 0.<br>00<br>21<br>80<br>70<br>5 | 0.<br>01<br>38<br>17<br>49<br>4 | 0.010197667 | 30817/8832/2207/3162/5880/6812                                                                   | 6      |
| B<br>P | GO:00<br>07187 | G<br>protein-coupled<br>receptor<br>signaling<br>pathway,<br>coupled to<br>cyclic<br>nucleotide<br>second<br>messenger | 19/92<br>6 | 178/1791<br>3 | 0.<br>00<br>22<br>01<br>51<br>8 | 0.<br>01<br>39<br>31<br>95<br>1 | 0.010282139 | 107/113/150/301/6347/3627/6373/4283/1906/2357/2358/847<br>7/27201/23566/8685/4886/5996/5997/7253 | 1<br>9 |
| B<br>P | GO:00<br>45669 | positive<br>regulation of<br>osteoblast<br>differentiation                                                             | 10/92<br>6 | 67/17913      | 0.<br>00<br>22<br>06<br>52      | 0.<br>01<br>39<br>46<br>23      | 0.010292683 | 655/2201/54857/3400/8519/3569/4057/4745/860/8626                                                 | 1<br>0 |

|        |                |                                                                      |            |               |                                 |                                 |             |                                                                                                  |        |
|--------|----------------|----------------------------------------------------------------------|------------|---------------|---------------------------------|---------------------------------|-------------|--------------------------------------------------------------------------------------------------|--------|
|        |                |                                                                      |            |               | 6                               | 7                               |             |                                                                                                  |        |
| B<br>P | GO:00<br>61614 | pri-miRNA<br>transcription<br>by RNA<br>polymerase<br>II             | 8/926      | 46/17913      | 0.<br>00<br>22<br>42<br>01<br>8 | 0.<br>01<br>41<br>21<br>00<br>4 | 0.010421665 | 8862/3725/688/11006/4781/4804/6662/6688                                                          | 8      |
| B<br>P | GO:00<br>70169 | positive<br>regulation of<br>biomineral<br>tissue<br>developmen<br>t | 8/926      | 46/17913      | 0.<br>00<br>22<br>42<br>01<br>8 | 0.<br>01<br>41<br>21<br>00<br>4 | 0.010421665 | 84059/655/2201/4057/4745/152816/5027/7020                                                        | 8      |
| B<br>P | GO:00<br>01764 | neuron<br>migration                                                  | 17/92<br>6 | 152/1791<br>3 | 0.<br>00<br>22<br>45<br>32      | 0.<br>01<br>41<br>21<br>00<br>4 | 0.010421665 | 1233/10752/7852/1630/9201/285313/3675/4139/266727/492<br>9/4897/3084/9423/5649/10371/347733/7422 | 1<br>7 |
| B<br>P | GO:00<br>30168 | platelet<br>activation                                               | 17/92<br>6 | 152/1791<br>3 | 0.<br>00<br>22<br>45<br>32      | 0.<br>01<br>41<br>21<br>00<br>4 | 0.010421665 | 150/348/139189/2207/83706/2811/3569/3932/3937/5294/23<br>533/5341/5579/5588/6403/6812/7409       | 1<br>7 |
| B<br>P | GO:00<br>02363 | alpha-beta T<br>cell lineage<br>commitment                           | 5/926      | 19/17913      | 0.<br>00<br>23<br>13<br>11      | 0.<br>01<br>44<br>22<br>08<br>3 | 0.010643869 | 3594/3569/3662/4063/114836                                                                       | 5      |
| B<br>P | GO:00<br>02689 | negative<br>regulation of<br>leukocyte<br>chemotaxis                 | 5/926      | 19/17913      | 0.<br>00<br>23<br>13<br>11      | 0.<br>01<br>44<br>22<br>08<br>3 | 0.010643869 | 6347/1843/11240/56833/26228                                                                      | 5      |

|        |                |                                                               |            |               |                                 |                                 |             |                                                                                                                                                                                                                   |        |
|--------|----------------|---------------------------------------------------------------|------------|---------------|---------------------------------|---------------------------------|-------------|-------------------------------------------------------------------------------------------------------------------------------------------------------------------------------------------------------------------|--------|
| B<br>P | GO:00<br>02710 | negative<br>regulation of<br>T cell<br>mediated<br>immunity   | 5/926      | 19/17913      | 0.<br>00<br>23<br>13<br>11      | 0.<br>01<br>44<br>22<br>08<br>3 | 0.010643869 | 2213/3134/3575/10859/5788                                                                                                                                                                                         | 5      |
| B<br>P | GO:00<br>02726 | positive<br>regulation of<br>T cell<br>cytokine<br>production | 5/926      | 19/17913      | 0.<br>00<br>23<br>13<br>11      | 0.<br>01<br>44<br>22<br>08<br>3 | 0.010643869 | 3553/3569/114548/91543/54440                                                                                                                                                                                      | 5      |
| B<br>P | GO:00<br>34104 | negative<br>regulation of<br>tissue<br>remodeling             | 5/926      | 19/17913      | 0.<br>00<br>23<br>13<br>11      | 0.<br>01<br>44<br>22<br>08<br>3 | 0.010643869 | 952/3569/5027/7128/4982                                                                                                                                                                                           | 5      |
| B<br>P | GO:00<br>48486 | parasympat<br>hetic<br>nervous<br>system<br>developmen<br>t   | 5/926      | 19/17913      | 0.<br>00<br>23<br>13<br>11      | 0.<br>01<br>44<br>22<br>08<br>3 | 0.010643869 | 1959/89797/10371/6899/7020                                                                                                                                                                                        | 5      |
| B<br>P | GO:00<br>71294 | cellular<br>response to<br>zinc ion                           | 5/926      | 19/17913      | 0.<br>00<br>23<br>13<br>11      | 0.<br>01<br>44<br>22<br>08<br>3 | 0.010643869 | 4489/4493/4499/4501/4502                                                                                                                                                                                          | 5      |
| B<br>P | GO:00<br>34765 | regulation of<br>ion<br>transmembr<br>ane<br>transport        | 38/92<br>6 | 453/1791<br>3 | 0.<br>00<br>23<br>32<br>60<br>9 | 0.<br>01<br>45<br>25<br>79<br>3 | 0.01072041  | 5243/150/274/777/6347/729230/930/57214/53405/11151/36<br>27/6373/4283/1536/2048/2903/2904/3359/3738/56479/3792/<br>4318/9722/5027/5031/5142/5294/10891/5649/5997/6236/63<br>28/6331/375611/6622/6769/342667/54209 | 3<br>8 |
| B      | GO:01          | regulation of                                                 | 18/92      | 166/1791      | 0.                              | 0.                              | 0.010964796 | 146206/6363/6366/1236/23242/139818/3383/688/4117/5027                                                                                                                                                             | 1      |

|        |                |                                                                                           |            |               |                                 |                                 |             |                                                                                          |        |
|--------|----------------|-------------------------------------------------------------------------------------------|------------|---------------|---------------------------------|---------------------------------|-------------|------------------------------------------------------------------------------------------|--------|
| P      | 20032          | plasma membrane bounded cell projection assembly                                          | 6          | 3             | 00<br>23<br>89<br>68<br>7       | 01<br>48<br>56<br>92<br>9       |             | /26499/5365/26051/55607/5880/9750/26228/7454                                             | 8      |
| B<br>P | GO:00<br>07259 | JAK-STAT cascade                                                                          | 16/92<br>6 | 140/1791<br>3 | 0.<br>00<br>23<br>94<br>07<br>2 | 0.<br>01<br>48<br>56<br>92<br>9 | 0.010964796 | 6347/6352/729230/1436/2261/2322/3059/3587/11009/13339<br>6/3569/3718/5788/5979/9021/6775 | 1<br>6 |
| B<br>P | GO:00<br>43154 | negative regulation of cysteine-type endopeptidase activity involved in apoptotic process | 11/92<br>6 | 79/17913      | 0.<br>00<br>23<br>94<br>57<br>7 | 0.<br>01<br>48<br>56<br>92<br>9 | 0.010964796 | 939/960/1800/2537/27074/4318/4804/5329/5272/6622/7422                                    | 1<br>1 |
| B<br>P | GO:00<br>10518 | positive regulation of phospholipase activity                                             | 9/926      | 57/17913      | 0.<br>00<br>24<br>37<br>90<br>3 | 0.<br>01<br>50<br>70<br>40<br>2 | 0.011122345 | 728/6352/2099/2261/3702/5031/5330/6401/7294                                              | 9      |
| B<br>P | GO:00<br>45453 | bone resorption                                                                           | 9/926      | 57/17913      | 0.<br>00<br>24<br>37<br>90<br>3 | 0.<br>01<br>50<br>70<br>40<br>2 | 0.011122345 | 952/1436/53832/3569/5027/5880/7128/4982/8600                                             | 9      |
| B<br>P | GO:00<br>46686 | response to cadmium ion                                                                   | 9/926      | 57/17913      | 0.<br>00<br>24<br>37            | 0.<br>01<br>50<br>70            | 0.011122345 | 1536/2729/3162/3725/4318/4489/4493/4501/653361                                           | 9      |

|        |                |                                                          |       |          |                            |                                 |             |                       |   |
|--------|----------------|----------------------------------------------------------|-------|----------|----------------------------|---------------------------------|-------------|-----------------------|---|
|        |                |                                                          |       |          | 90<br>3                    | 40<br>2                         |             |                       |   |
| B<br>P | GO:00<br>16045 | detection of<br>bacterium                                | 4/926 | 12/17913 | 0.<br>00<br>25<br>14<br>82 | 0.<br>01<br>53<br>95<br>67<br>8 | 0.011362407 | 64127/7096/7097/10333 | 4 |
| B<br>P | GO:00<br>38110 | interleukin-2<br>-mediated<br>signaling<br>pathway       | 4/926 | 12/17913 | 0.<br>00<br>25<br>14<br>82 | 0.<br>01<br>53<br>95<br>67<br>8 | 0.011362407 | 3559/3560/3561/3718   | 4 |
| B<br>P | GO:00<br>44650 | adhesion of<br>symbiont to<br>host cell                  | 4/926 | 12/17913 | 0.<br>00<br>25<br>14<br>82 | 0.<br>01<br>53<br>95<br>67<br>8 | 0.011362407 | 30835/10332/3383/5818 | 4 |
| B<br>P | GO:00<br>51608 | histamine<br>transport                                   | 4/926 | 12/17913 | 0.<br>00<br>25<br>14<br>82 | 0.<br>01<br>53<br>95<br>67<br>8 | 0.011362407 | 100/695/1906/6581     | 4 |
| B<br>P | GO:00<br>60100 | positive<br>regulation of<br>phagocytosis,<br>engulfment | 4/926 | 12/17913 | 0.<br>00<br>25<br>14<br>82 | 0.<br>01<br>53<br>95<br>67<br>8 | 0.011362407 | 718/948/3071/26228    | 4 |
| B<br>P | GO:00<br>60707 | trophoblast<br>giant cell<br>differentiation             | 4/926 | 12/17913 | 0.<br>00<br>25<br>14<br>82 | 0.<br>01<br>53<br>95<br>67      | 0.011362407 | 79733/2709/639/9021   | 4 |

|        |                |                                                                             |            |               |                                 |                                 |             |                                                                                                                                                     |        |
|--------|----------------|-----------------------------------------------------------------------------|------------|---------------|---------------------------------|---------------------------------|-------------|-----------------------------------------------------------------------------------------------------------------------------------------------------|--------|
|        |                |                                                                             |            |               |                                 | 8                               |             |                                                                                                                                                     |        |
| B<br>P | GO:00<br>70493 | thrombin-act<br>ivated<br>receptor<br>signaling<br>pathway                  | 4/926      | 12/17913      | 0.<br>00<br>25<br>14<br>82      | 0.<br>01<br>53<br>95<br>67<br>8 | 0.011362407 | 2811/10788/5341/6622                                                                                                                                | 4      |
| B<br>P | GO:19<br>05155 | positive<br>regulation of<br>membrane<br>invagination                       | 4/926      | 12/17913      | 0.<br>00<br>25<br>14<br>82      | 0.<br>01<br>53<br>95<br>67<br>8 | 0.011362407 | 718/948/3071/26228                                                                                                                                  | 4      |
| B<br>P | GO:00<br>51590 | positive<br>regulation of<br>neurotrans<br>mitter<br>transport              | 7/926      | 37/17913      | 0.<br>00<br>25<br>43<br>70<br>6 | 0.<br>01<br>55<br>53<br>73<br>6 | 0.011479058 | 8862/8938/8564/5027/6622/6812/8600                                                                                                                  | 7      |
| B<br>P | GO:00<br>31098 | stress-activ<br>ated protein<br>kinase<br>signaling<br>cascade              | 26/92<br>6 | 278/1791<br>3 | 0.<br>00<br>26<br>05<br>81<br>6 | 0.<br>01<br>59<br>14<br>31<br>5 | 0.011745174 | 6363/6366/1236/939/1843/1906/10595/355/2213/3553/1118<br>4/653361/64127/4868/5187/26191/10125/10371/140885/650<br>4/10333/8600/23043/7422/9839/7538 | 2<br>6 |
| B<br>P | GO:00<br>02717 | positive<br>regulation of<br>natural killer<br>cell<br>mediated<br>immunity | 6/926      | 28/17913      | 0.<br>00<br>26<br>55<br>78<br>5 | 0.<br>01<br>61<br>22<br>36<br>6 | 0.011898722 | 3134/3902/10125/4068/114836/7409                                                                                                                    | 6      |
| B<br>P | GO:00<br>34367 | protein-cont<br>aining<br>complex<br>remodeling                             | 6/926      | 28/17913      | 0.<br>00<br>26<br>55<br>78<br>5 | 0.<br>01<br>61<br>22<br>36<br>6 | 0.011898722 | 341/348/1071/4018/4023/7941                                                                                                                         | 6      |

|        |                |                                                                |            |               |                                 |                                 |             |                                                                                                                                                                                                           |        |
|--------|----------------|----------------------------------------------------------------|------------|---------------|---------------------------------|---------------------------------|-------------|-----------------------------------------------------------------------------------------------------------------------------------------------------------------------------------------------------------|--------|
| B<br>P | GO:00<br>34368 | protein-lipid<br>complex<br>remodeling                         | 6/926      | 28/17913      | 0.<br>00<br>26<br>55<br>78<br>5 | 0.<br>01<br>61<br>22<br>36<br>6 | 0.011898722 | 341/348/1071/4018/4023/7941                                                                                                                                                                               | 6      |
| B<br>P | GO:00<br>34369 | plasma<br>lipoprotein<br>particle<br>remodeling                | 6/926      | 28/17913      | 0.<br>00<br>26<br>55<br>78<br>5 | 0.<br>01<br>61<br>22<br>36<br>6 | 0.011898722 | 341/348/1071/4018/4023/7941                                                                                                                                                                               | 6      |
| B<br>P | GO:20<br>00108 | positive<br>regulation of<br>leukocyte<br>apoptotic<br>process | 6/926      | 28/17913      | 0.<br>00<br>26<br>55<br>78<br>5 | 0.<br>01<br>61<br>22<br>36<br>6 | 0.011898722 | 6352/29126/3620/8013/5027/5293                                                                                                                                                                            | 6      |
| B<br>P | GO:00<br>60491 | regulation of<br>cell<br>projection<br>assembly                | 18/92<br>6 | 168/1791<br>3 | 0.<br>00<br>27<br>24<br>72<br>5 | 0.<br>01<br>65<br>21<br>08<br>9 | 0.01219299  | 146206/6363/6366/1236/23242/139818/3383/688/4117/5027<br>/26499/5365/26051/55607/5880/9750/26228/7454                                                                                                     | 1<br>8 |
| B<br>P | GO:00<br>06979 | response to<br>oxidative<br>stress                             | 37/92<br>6 | 442/1791<br>3 | 0.<br>00<br>27<br>38<br>08<br>4 | 0.<br>01<br>65<br>82<br>25<br>8 | 0.012238134 | 100/199/348/374/655/695/6363/1236/948/952/1536/139189/<br>1800/1843/1906/2729/3162/3304/3569/3725/120892/79772/<br>4318/653361/4688/4689/4929/8013/10891/5742/6414/14368<br>6/140885/6622/6648/10333/7128 | 3<br>7 |
| B<br>P | GO:00<br>09988 | cell-cell<br>recognition                                       | 10/92<br>6 | 69/17913      | 0.<br>00<br>27<br>57<br>46<br>9 | 0.<br>01<br>66<br>79<br>72<br>9 | 0.012310069 | 6363/6366/1236/30835/923/10332/1794/84868/4478/5551                                                                                                                                                       | 1<br>0 |
| B      | GO:00          | Fc receptor                                                    | 16/92      | 142/1791      | 0.                              | 0.                              | 0.012333205 | 919/917/26999/9844/2209/2212/2213/2214/3055/64005/307                                                                                                                                                     | 1      |

|        |                |                                                                    |            |               |                                 |                                 |             |                                                                                                                                |        |
|--------|----------------|--------------------------------------------------------------------|------------|---------------|---------------------------------|---------------------------------|-------------|--------------------------------------------------------------------------------------------------------------------------------|--------|
| P      | 02431          | mediated stimulatory signaling pathway                             | 6          | 3             | 00<br>27<br>65<br>94<br>9       | 01<br>67<br>11<br>07<br>7       |             | 1/8013/5788/7409/7454/7456                                                                                                     | 6      |
| B<br>P | GO:00<br>71356 | cellular response to tumor necrosis factor                         | 25/92<br>6 | 266/1791<br>3 | 0.<br>00<br>29<br>20<br>17<br>7 | 0.<br>01<br>76<br>21<br>87<br>7 | 0.013005399 | 9447/27063/330/6347/6348/6352/939/1116/3576/1906/2633/3304/3383/3856/4050/10891/5696/5698/7128/4982/23495/8600/10673/7412/7538 | 2<br>5 |
| B<br>P | GO:00<br>43523 | regulation of neuron apoptotic process                             | 21/92<br>6 | 210/1791<br>3 | 0.<br>00<br>29<br>53<br>48<br>8 | 0.<br>01<br>77<br>01<br>89<br>4 | 0.013064454 | 728/6347/6348/10752/11151/112399/2729/3162/3684/3725/4929/8013/26471/5063/10891/54463/6622/6648/6812/7020/7305                 | 2<br>1 |
| B<br>P | GO:00<br>42053 | regulation of dopamine metabolic process                           | 5/926      | 20/17913      | 0.<br>00<br>29<br>54<br>39      | 0.<br>01<br>77<br>01<br>89<br>4 | 0.013064454 | 3684/3689/4129/4929/6622                                                                                                       | 5      |
| B<br>P | GO:00<br>42069 | regulation of catecholamine metabolic process                      | 5/926      | 20/17913      | 0.<br>00<br>29<br>54<br>39      | 0.<br>01<br>77<br>01<br>89<br>4 | 0.013064454 | 3684/3689/4129/4929/6622                                                                                                       | 5      |
| B<br>P | GO:00<br>43369 | CD4-positive or CD8-positive, alpha-beta T cell lineage commitment | 5/926      | 20/17913      | 0.<br>00<br>29<br>54<br>39      | 0.<br>01<br>77<br>01<br>89<br>4 | 0.013064454 | 3594/3569/3662/4063/114836                                                                                                     | 5      |
| B      | GO:00          | chemokine                                                          | 5/926      | 20/17913      | 0.                              | 0.                              | 0.013064454 | 199/1436/9173/90865/4023                                                                                                       | 5      |



|        |                |                                                                    |            |               |                                 |                                 |             |                                                                                                                                                                                     |        |
|--------|----------------|--------------------------------------------------------------------|------------|---------------|---------------------------------|---------------------------------|-------------|-------------------------------------------------------------------------------------------------------------------------------------------------------------------------------------|--------|
| P      | 90195          | secretion                                                          |            |               | 00<br>29<br>54<br>39            | 01<br>77<br>01<br>89<br>4       |             |                                                                                                                                                                                     |        |
| B<br>P | GO:19<br>05523 | positive<br>regulation of<br>macrophage<br>migration               | 5/926      | 20/17913      | 0.<br>00<br>29<br>54<br>39      | 0.<br>01<br>77<br>01<br>89<br>4 | 0.013064454 | 719/728/6348/6352/54209                                                                                                                                                             | 5      |
| B<br>P | GO:19<br>03727 | positive<br>regulation of<br>phospholipi<br>d metabolic<br>process | 8/926      | 48/17913      | 0.<br>00<br>29<br>60<br>50<br>6 | 0.<br>01<br>77<br>17<br>59<br>8 | 0.013076044 | 6363/6366/1236/930/2261/2322/2358/64127                                                                                                                                             | 8      |
| B<br>P | GO:00<br>43547 | positive<br>regulation of<br>GTPase<br>activity                    | 30/92<br>6 | 339/1791<br>3 | 0.<br>00<br>29<br>67<br>35<br>8 | 0.<br>01<br>77<br>37<br>66      | 0.01309085  | 9744/216/55843/9411/23526/64333/6363/6366/1236/10563/<br>55619/139818/1794/8477/3383/3725/120892/3071/22821/15<br>3020/10125/10235/729857/5996/26575/5997/9628/6281/117<br>289/7409 | 3<br>0 |
| B<br>P | GO:00<br>07520 | myoblast<br>fusion                                                 | 7/926      | 38/17913      | 0.<br>00<br>29<br>81<br>39<br>8 | 0.<br>01<br>77<br>79<br>65<br>7 | 0.013121845 | 575/963/50937/3627/4283/4868/9750                                                                                                                                                   | 7      |
| B<br>P | GO:00<br>32620 | interleukin-1<br>7 production                                      | 7/926      | 38/17913      | 0.<br>00<br>29<br>81<br>39<br>8 | 0.<br>01<br>77<br>79<br>65<br>7 | 0.013121845 | 384/3569/4063/3071/64127/5588/114836                                                                                                                                                | 7      |
| B<br>P | GO:00<br>15711 | organic<br>anion                                                   | 36/92<br>6 | 430/1791<br>3 | 0.<br>00                        | 0.<br>01                        | 0.013602395 | 5243/5244/341/348/366/10396/771/768/948/1071/1906/2350<br>/3553/8564/4948/5027/26279/8497/5997/6556/117247/6507/                                                                    | 3<br>6 |

|        |                |                                                                                        |            |               |                                 |                                 |             |                                                                                              |        |
|--------|----------------|----------------------------------------------------------------------------------------|------------|---------------|---------------------------------|---------------------------------|-------------|----------------------------------------------------------------------------------------------|--------|
|        |                | transport                                                                              |            |               | 30<br>94<br>22                  | 84<br>30<br>78<br>6             |             | 375611/6513/9498/159963/6538/6535/6545/9056/6578/11309/6622/6812/8600/9256                   |        |
| B<br>P | GO:00<br>50728 | negative<br>regulation of<br>inflammator<br>y response                                 | 18/92<br>6 | 170/1791<br>3 | 0.<br>00<br>30<br>98<br>08<br>6 | 0.<br>01<br>84<br>32<br>15<br>9 | 0.013603408 | 54/100/113/348/2213/2358/7850/3559/4210/197358/114548/4907/5788/89790/140885/56833/9021/7128 | 1<br>8 |
| B<br>P | GO:19<br>03169 | regulation of<br>calcium ion<br>transmembr<br>ane<br>transport                         | 16/92<br>6 | 144/1791<br>3 | 0.<br>00<br>31<br>84<br>45<br>6 | 0.<br>01<br>89<br>09<br>27<br>6 | 0.013955533 | 150/274/930/57214/11151/3627/6373/4283/9722/5031/5142/5294/6236/6622/6769/342667             | 1<br>6 |
| B<br>P | GO:00<br>02888 | positive<br>regulation of<br>myeloid<br>leukocyte<br>mediated<br>immunity              | 6/926      | 29/17913      | 0.<br>00<br>32<br>04<br>39<br>3 | 0.<br>01<br>89<br>09<br>27<br>6 | 0.013955533 | 695/718/2207/3684/3689/6812                                                                  | 6      |
| B<br>P | GO:00<br>10575 | positive<br>regulation of<br>vascular<br>endothelial<br>growth<br>factor<br>production | 6/926      | 29/17913      | 0.<br>00<br>32<br>04<br>39<br>3 | 0.<br>01<br>89<br>09<br>27<br>6 | 0.013955533 | 718/719/728/147372/3553/3569                                                                 | 6      |
| B<br>P | GO:00<br>21602 | cranial<br>nerve<br>morphogen<br>esis                                                  | 6/926      | 29/17913      | 0.<br>00<br>32<br>04<br>39<br>3 | 0.<br>01<br>89<br>09<br>27<br>6 | 0.013955533 | 1959/2048/3213/10371/6899/7020                                                               | 6      |
| B<br>P | GO:00<br>33006 | regulation of<br>mast cell                                                             | 6/926      | 29/17913      | 0.<br>00                        | 0.<br>01                        | 0.013955533 | 30817/8832/2207/3162/5880/6812                                                               | 6      |

|        |            |                                                 |        |           |           |           |             |                                                                                                                                                  |        |
|--------|------------|-------------------------------------------------|--------|-----------|-----------|-----------|-------------|--------------------------------------------------------------------------------------------------------------------------------------------------|--------|
|        |            | activation involved in immune response          |        |           | 3204393   | 8909276   |             |                                                                                                                                                  |        |
| B<br>P | GO:0048873 | homeostasis of number of cells within a tissue  | 6/926  | 29/17913  | 003204393 | 0089276   | 0.013955533 | 10000/729230/11151/5027/54440/6662                                                                                                               | 6      |
| B<br>P | GO:2000778 | positive regulation of interleukin-6 secretion  | 6/926  | 29/17913  | 003204393 | 0089276   | 0.013955533 | 199/3553/3556/353514/4023/51311                                                                                                                  | 6      |
| B<br>P | GO:1990823 | response to leukemia inhibitory factor          | 12/926 | 94/17913  | 00325843  | 009183486 | 0.014157907 | 8745/3099/3383/9118/688/7805/4744/11240/26577/9021/9806/8600                                                                                     | 1<br>2 |
| B<br>P | GO:1990830 | cellular response to leukemia inhibitory factor | 12/926 | 94/17913  | 00325843  | 009183486 | 0.014157907 | 8745/3099/3383/9118/688/7805/4744/11240/26577/9021/9806/8600                                                                                     | 1<br>2 |
| B<br>P | GO:1904062 | regulation of cation transmembrane transport    | 28/926 | 312/17913 | 003300856 | 00941071  | 0.014325609 | 150/274/6347/729230/930/57214/11151/3627/6373/4283/2048/2903/2904/3792/4318/9722/5031/5142/5294/10891/5649/5997/6236/6331/6622/6769/342667/54209 | 2<br>8 |
| B<br>P | GO:0035272 | exocrine system development                     | 8/926  | 49/17913  | 0033      | 009198    | 0.01465686  | 655/3481/284217/4781/10371/6662/29842/7052                                                                                                       | 8      |

|        |                |                                                                            |            |               |                                 |                                 |             |                                                                                                        |        |
|--------|----------------|----------------------------------------------------------------------------|------------|---------------|---------------------------------|---------------------------------|-------------|--------------------------------------------------------------------------------------------------------|--------|
|        |                | t                                                                          |            |               | 81<br>09<br>9                   | 59<br>55<br>1                   |             |                                                                                                        |        |
| B<br>P | GO:00<br>02262 | myeloid cell<br>homeostasi<br>s                                            | 16/92<br>6 | 145/1791<br>3 | 0.<br>00<br>34<br>12<br>53<br>2 | 0.<br>01<br>99<br>32<br>41<br>6 | 0.014710637 | 301/729230/1021/2207/3059/3162/3216/3304/10320/3569/3<br>071/5142/5293/6688/7422/7538                  | 1<br>6 |
| B<br>P | GO:00<br>71774 | response to<br>fibroblast<br>growth<br>factor                              | 16/92<br>6 | 145/1791<br>3 | 0.<br>00<br>34<br>12<br>53<br>2 | 0.<br>01<br>99<br>32<br>41<br>6 | 0.014710637 | 8862/6347/6352/960/10563/3576/1960/54845/2261/2729/28<br>17/3164/860/6622/6899/7538                    | 1<br>6 |
| B<br>P | GO:00<br>01960 | negative<br>regulation of<br>cytokine-me<br>diated<br>signaling<br>pathway | 10/92<br>6 | 71/17913      | 0.<br>00<br>34<br>13<br>16<br>6 | 0.<br>01<br>99<br>32<br>41<br>6 | 0.014710637 | 6352/7850/3569/11213/4321/84166/11240/5788/6091/26228                                                  | 1<br>0 |
| B<br>P | GO:00<br>02312 | B cell<br>activation<br>involved in<br>immune<br>response                  | 10/92<br>6 | 71/17913      | 0.<br>00<br>34<br>13<br>16<br>6 | 0.<br>01<br>99<br>32<br>41<br>6 | 0.014710637 | 100/930/940/55619/139818/2213/1880/9452/23228/5788                                                     | 1<br>0 |
| B<br>P | GO:00<br>30500 | regulation of<br>bone<br>mineralizati<br>on                                | 10/92<br>6 | 71/17913      | 0.<br>00<br>34<br>13<br>16<br>6 | 0.<br>01<br>99<br>32<br>41<br>6 | 0.014710637 | 84059/655/6348/2201/4057/4745/5027/6662/5552/7020                                                      | 1<br>0 |
| B<br>P | GO:00<br>30278 | regulation of<br>ossification                                              | 20/92<br>6 | 199/1791<br>3 | 0.<br>00<br>34<br>62            | 0.<br>02<br>00<br>51            | 0.014798883 | 84059/374/655/6348/1021/1959/2201/54857/3400/8519/356<br>9/4038/4057/4745/5027/860/6662/5552/7020/8626 | 2<br>0 |

|        |                |                                                             |            |               |                                 |                                 |             |                                                                                                             |        |
|--------|----------------|-------------------------------------------------------------|------------|---------------|---------------------------------|---------------------------------|-------------|-------------------------------------------------------------------------------------------------------------|--------|
|        |                |                                                             |            |               | 40<br>7                         | 98<br>7                         |             |                                                                                                             |        |
| B<br>P | GO:00<br>34764 | positive<br>regulation of<br>transmembr<br>ane<br>transport | 20/92<br>6 | 199/1791<br>3 | 0.<br>00<br>34<br>62<br>40<br>7 | 0.<br>02<br>00<br>51<br>98<br>7 | 0.014798883 | 5243/718/6347/729230/930/57214/3627/6373/4283/2048/33<br>59/9722/8013/5027/5031/5649/6622/6769/342667/54209 | 2<br>0 |
| B<br>P | GO:00<br>30501 | positive<br>regulation of<br>bone<br>mineralizati<br>on     | 7/926      | 39/17913      | 0.<br>00<br>34<br>74<br>43<br>6 | 0.<br>02<br>00<br>51<br>98<br>7 | 0.014798883 | 84059/655/2201/4057/4745/5027/7020                                                                          | 7      |
| B<br>P | GO:00<br>33003 | regulation of<br>mast cell<br>activation                    | 7/926      | 39/17913      | 0.<br>00<br>34<br>74<br>43<br>6 | 0.<br>02<br>00<br>51<br>98<br>7 | 0.014798883 | 30817/8832/2207/3162/8013/5880/6812                                                                         | 7      |
| B<br>P | GO:00<br>14902 | myotube<br>differentiatio<br>n                              | 13/92<br>6 | 107/1791<br>3 | 0.<br>00<br>34<br>79<br>87<br>8 | 0.<br>02<br>00<br>51<br>98<br>7 | 0.014798883 | 575/963/50937/3627/4283/56603/9734/3792/688/50804/486<br>8/9750/6899                                        | 1<br>3 |
| B<br>P | GO:00<br>02679 | respiratory<br>burst<br>involved in<br>defense<br>response  | 4/926      | 13/17913      | 0.<br>00<br>34<br>85<br>06<br>6 | 0.<br>02<br>00<br>51<br>98<br>7 | 0.014798883 | 3055/5293/5294/56833                                                                                        | 4      |
| B<br>P | GO:00<br>32754 | positive<br>regulation of<br>interleukin-5<br>production    | 4/926      | 13/17913      | 0.<br>00<br>34<br>85<br>06      | 0.<br>02<br>00<br>51<br>98      | 0.014798883 | 3556/9173/90865/114548                                                                                      | 4      |

|        |                |                                                                                              |       |          |                                 |                                 |             |                       |   |
|--------|----------------|----------------------------------------------------------------------------------------------|-------|----------|---------------------------------|---------------------------------|-------------|-----------------------|---|
| B<br>P | GO:00<br>34374 | low-density<br>lipoprotein<br>particle<br>remodeling                                         | 4/926 | 13/17913 | 0.<br>00<br>34<br>85<br>06<br>6 | 0.<br>02<br>00<br>51<br>98<br>7 | 0.014798883 | 348/1071/4018/7941    | 4 |
| B<br>P | GO:00<br>45073 | regulation of<br>chemokine<br>biosynthetic<br>process                                        | 4/926 | 13/17913 | 0.<br>00<br>34<br>85<br>06<br>6 | 0.<br>02<br>00<br>51<br>98<br>7 | 0.014798883 | 1958/3162/3553/3569   | 4 |
| B<br>P | GO:00<br>61888 | regulation of<br>astrocyte<br>activation                                                     | 4/926 | 13/17913 | 0.<br>00<br>34<br>85<br>06<br>6 | 0.<br>02<br>00<br>51<br>98<br>7 | 0.014798883 | 712/728/3569/54209    | 4 |
| B<br>P | GO:00<br>70431 | nucleotide-b<br>inding<br>oligomerizat<br>ion domain<br>containing 2<br>signaling<br>pathway | 4/926 | 13/17913 | 0.<br>00<br>34<br>85<br>06<br>6 | 0.<br>02<br>00<br>51<br>98<br>7 | 0.014798883 | 3304/64127/26191/7128 | 4 |
| B<br>P | GO:00<br>71352 | cellular<br>response to<br>interleukin-2                                                     | 4/926 | 13/17913 | 0.<br>00<br>34<br>85<br>06<br>6 | 0.<br>02<br>00<br>51<br>98<br>7 | 0.014798883 | 3559/3560/3561/3718   | 4 |
| B<br>P | GO:00<br>98543 | detection of<br>other<br>organism                                                            | 4/926 | 13/17913 | 0.<br>00<br>34<br>85<br>06      | 0.<br>02<br>00<br>51<br>98      | 0.014798883 | 64127/7096/7097/10333 | 4 |

|        |                |                                                                            |            |               |                                 |                                 |             |                                                                                                                                                                                                              |        |
|--------|----------------|----------------------------------------------------------------------------|------------|---------------|---------------------------------|---------------------------------|-------------|--------------------------------------------------------------------------------------------------------------------------------------------------------------------------------------------------------------|--------|
|        |                |                                                                            |            |               | 6                               | 7                               |             |                                                                                                                                                                                                              |        |
| B<br>P | GO:00<br>43123 | positive<br>regulation of<br>I-kappaB<br>kinase/NF-k<br>appaB<br>signaling | 18/92<br>6 | 172/1791<br>3 | 0.<br>00<br>35<br>13<br>05      | 0.<br>02<br>01<br>90<br>08<br>3 | 0.014900801 | 330/6363/6366/1236/948/972/51704/3162/4057/64127/1104<br>0/5579/6398/7052/10333/8600/10346/10537                                                                                                             | 1<br>8 |
| B<br>P | GO:00<br>06925 | inflammator<br>y cell<br>apoptotic<br>process                              | 5/926      | 21/17913      | 0.<br>00<br>37<br>14<br>73      | 0.<br>02<br>12<br>52<br>78<br>1 | 0.0156851   | 6352/1514/3569/64127/5293                                                                                                                                                                                    | 5      |
| B<br>P | GO:00<br>10884 | positive<br>regulation of<br>lipid storage                                 | 5/926      | 21/17913      | 0.<br>00<br>37<br>14<br>73      | 0.<br>02<br>12<br>52<br>78<br>1 | 0.0156851   | 718/948/29923/4023/4481                                                                                                                                                                                      | 5      |
| B<br>P | GO:00<br>32928 | regulation of<br>superoxide<br>anion<br>generation                         | 5/926      | 21/17913      | 0.<br>00<br>37<br>14<br>73      | 0.<br>02<br>12<br>52<br>78<br>1 | 0.0156851   | 54/2358/3684/3689/7305                                                                                                                                                                                       | 5      |
| B<br>P | GO:00<br>51589 | negative<br>regulation of<br>neurotrans<br>mitter<br>transport             | 5/926      | 21/17913      | 0.<br>00<br>37<br>14<br>73      | 0.<br>02<br>12<br>52<br>78<br>1 | 0.0156851   | 10859/4129/55607/5997/6622                                                                                                                                                                                   | 5      |
| B<br>P | GO:00<br>31667 | response to<br>nutrient<br>levels                                          | 38/92<br>6 | 466/1791<br>3 | 0.<br>00<br>37<br>69<br>90<br>4 | 0.<br>02<br>15<br>44<br>13<br>1 | 0.015900124 | 100/122622/249/348/467/655/717/916/3627/1536/56603/182<br>4/355/2350/2729/3162/3383/3428/3553/3725/57535/4023/12<br>0892/4316/64127/5027/5029/5251/10891/58528/143686/658<br>1/6513/6696/7054/4982/7412/7538 | 3<br>8 |

|        |                |                                                              |            |          |                                 |                                 |             |                                                                  |        |
|--------|----------------|--------------------------------------------------------------|------------|----------|---------------------------------|---------------------------------|-------------|------------------------------------------------------------------|--------|
| B<br>P | GO:00<br>07202 | activation of<br>phospholipa<br>se C activity                | 6/926      | 30/17913 | 0.<br>00<br>38<br>33<br>19<br>2 | 0.<br>02<br>18<br>31<br>96<br>9 | 0.016112556 | 728/3702/5031/5330/6401/7294                                     | 6      |
| B<br>P | GO:00<br>21772 | olfactory<br>bulb<br>developmen<br>t                         | 6/926      | 30/17913 | 0.<br>00<br>38<br>33<br>19<br>2 | 0.<br>02<br>18<br>31<br>96<br>9 | 0.016112556 | 1436/1749/8320/120892/6091/10371                                 | 6      |
| B<br>P | GO:00<br>50690 | regulation of<br>defense<br>response to<br>virus by<br>virus | 6/926      | 30/17913 | 0.<br>00<br>38<br>33<br>19<br>2 | 0.<br>02<br>18<br>31<br>96<br>9 | 0.016112556 | 919/940/1794/9844/3055/3932                                      | 6      |
| B<br>P | GO:00<br>02931 | response to<br>ischemia                                      | 8/926      | 50/17913 | 0.<br>00<br>38<br>46<br>57<br>6 | 0.<br>02<br>18<br>59<br>07<br>1 | 0.016132558 | 1436/1958/3099/5027/10891/375611/54209/7345                      | 8      |
| B<br>P | GO:00<br>50771 | negative<br>regulation of<br>axonogenes<br>is                | 8/926      | 50/17913 | 0.<br>00<br>38<br>46<br>57<br>6 | 0.<br>02<br>18<br>59<br>07<br>1 | 0.016132558 | 1630/2048/23105/4038/4804/9423/5800/6696                         | 8      |
| B<br>P | GO:00<br>18958 | phenol-cont<br>aining<br>compound<br>metabolic<br>process    | 12/92<br>6 | 96/17913 | 0.<br>00<br>38<br>80<br>65<br>1 | 0.<br>02<br>20<br>03<br>37<br>8 | 0.01623906  | 2903/3684/3689/4129/4929/4948/6622/9627/6799/27284/70<br>54/9839 | 1<br>2 |
| B      | GO:00          | regulation of                                                | 12/92      | 96/17913 | 0.                              | 0.                              | 0.01623906  | 107/321/8938/8564/120892/79772/55607/5579/6622/9627/6            | 1      |



|        |                |                                                                        |            |               |                                 |                                 |             |                                                                                                            |        |
|--------|----------------|------------------------------------------------------------------------|------------|---------------|---------------------------------|---------------------------------|-------------|------------------------------------------------------------------------------------------------------------|--------|
| P      | 46928          | neurotransmitter secretion                                             | 6          |               | 00<br>38<br>80<br>65<br>1       | 02<br>20<br>03<br>37<br>8       |             | 812/91683                                                                                                  | 2      |
| B<br>P | GO:00<br>06865 | amino acid transport                                                   | 15/92<br>6 | 134/1791<br>3 | 0.<br>00<br>39<br>30<br>90<br>3 | 0.<br>02<br>22<br>63<br>40<br>2 | 0.016430964 | 8564/4948/5027/8497/5997/6556/117247/6507/6538/6535/6545/9056/6622/6812/9256                               | 1<br>5 |
| B<br>P | GO:00<br>19835 | cytolysis                                                              | 7/926      | 40/17913      | 0.<br>00<br>40<br>27<br>15<br>7 | 0.<br>02<br>27<br>32<br>36      | 0.016777068 | 730/3001/3002/10859/4069/5027/5551                                                                         | 7      |
| B<br>P | GO:00<br>51281 | positive regulation of release of sequestered calcium ion into cytosol | 7/926      | 40/17913      | 0.<br>00<br>40<br>27<br>15<br>7 | 0.<br>02<br>27<br>32<br>36      | 0.016777068 | 930/57214/3627/6373/4283/5031/6622                                                                         | 7      |
| B<br>P | GO:20<br>00273 | positive regulation of signaling receptor activity                     | 7/926      | 40/17913      | 0.<br>00<br>40<br>27<br>15<br>7 | 0.<br>02<br>27<br>32<br>36      | 0.016777068 | 150/6347/729230/2048/2069/653361/5649                                                                      | 7      |
| B<br>P | GO:00<br>42737 | drug catabolic process                                                 | 13/92<br>6 | 109/1791<br>3 | 0.<br>00<br>40<br>87<br>65<br>8 | 0.<br>02<br>30<br>48<br>20<br>6 | 0.01701017  | 100/51816/217/1118/1557/1577/1806/259307/4129/4907/6622/6799/27284                                         | 1<br>3 |
| B<br>P | GO:00<br>16358 | dendrite developmen                                                    | 21/92<br>6 | 216/1791<br>3 | 0.<br>00                        | 0.<br>02                        | 0.017077405 | 348/655/916/1952/23242/1630/9201/55619/2048/23105/23426/57549/4038/120892/4139/5063/55607/5649/10371/80725 | 2<br>1 |

|        |                |                                                                       |            |               |                                 |                                 |             |                                                                                                                        |        |
|--------|----------------|-----------------------------------------------------------------------|------------|---------------|---------------------------------|---------------------------------|-------------|------------------------------------------------------------------------------------------------------------------------|--------|
|        |                | t                                                                     |            |               | 41<br>12<br>94<br>5             | 31<br>39<br>30<br>7             |             | /23043                                                                                                                 |        |
| B<br>P | GO:00<br>48588 | developmen<br>tal cell<br>growth                                      | 21/92<br>6 | 216/1791<br>3 | 0.<br>00<br>41<br>12<br>94<br>5 | 0.<br>02<br>31<br>39<br>30<br>7 | 0.017077405 | 348/23242/7852/26999/1630/9201/1906/23105/3676/3897/2<br>3566/4897/9423/10439/5997/10371/6662/6696/51760/7422/<br>9839 | 2<br>1 |
| B<br>P | GO:00<br>42552 | myelination                                                           | 14/92<br>6 | 122/1791<br>3 | 0.<br>00<br>41<br>92<br>71<br>6 | 0.<br>02<br>35<br>61<br>94<br>9 | 0.017389325 | 23205/7852/1959/23136/2817/3400/3687/3792/5653/10397/<br>3084/7097/1890/7368                                           | 1<br>4 |
| B<br>P | GO:01<br>06027 | neuron<br>projection<br>organization                                  | 11/92<br>6 | 85/17913      | 0.<br>00<br>42<br>73<br>31<br>8 | 0.<br>02<br>39<br>88<br>31<br>8 | 0.017703997 | 348/55619/2048/2213/2904/3675/120892/5063/55607/5649/<br>80725                                                         | 1<br>1 |
| B<br>P | GO:00<br>02712 | regulation of<br>B cell<br>mediated<br>immunity                       | 8/926      | 51/17913      | 0.<br>00<br>43<br>60<br>01<br>1 | 0.<br>02<br>44<br>20<br>88<br>2 | 0.01802324  | 695/718/940/1378/2207/2208/2213/5788                                                                                   | 8      |
| B<br>P | GO:00<br>02889 | regulation of<br>immunoglob<br>ulin<br>mediated<br>immune<br>response | 8/926      | 51/17913      | 0.<br>00<br>43<br>60<br>01<br>1 | 0.<br>02<br>44<br>20<br>88<br>2 | 0.01802324  | 695/718/940/1378/2207/2208/2213/5788                                                                                   | 8      |
| B<br>P | GO:00<br>32479 | regulation of<br>type I<br>interferon                                 | 14/92<br>6 | 123/1791<br>3 | 0.<br>00<br>45                  | 0.<br>02<br>52                  | 0.018631847 | 84868/51191/3428/10859/4321/197358/84166/26191/14088<br>5/7097/51284/51311/7128/81030                                  | 1<br>4 |

|        |                |                                                  |            |               |                                 |                                 |             |                                                                                                                                                               |        |
|--------|----------------|--------------------------------------------------|------------|---------------|---------------------------------|---------------------------------|-------------|---------------------------------------------------------------------------------------------------------------------------------------------------------------|--------|
|        |                | production                                       |            |               | 12<br>55<br>7                   | 45<br>52<br>4                   |             |                                                                                                                                                               |        |
| B<br>P | GO:19<br>01653 | cellular<br>response to<br>peptide               | 31/92<br>6 | 364/1791<br>3 | 0.<br>00<br>45<br>17<br>20<br>1 | 0.<br>02<br>52<br>45<br>52<br>4 | 0.018631847 | 107/113/948/1906/2213/2358/2729/9734/3383/3481/3553/3676/3718/688/4023/51237/4804/64127/3164/4929/8013/5140/5577/5579/5588/26191/143686/10333/54209/7253/7412 | 3<br>1 |
| B<br>P | GO:00<br>97305 | response to<br>alcohol                           | 22/92<br>6 | 232/1791<br>3 | 0.<br>00<br>45<br>37<br>87<br>3 | 0.<br>02<br>53<br>33<br>12<br>5 | 0.018696499 | 107/113/6363/6366/6348/1236/929/939/999/1536/2903/2904/3359/3383/4129/1184/5031/5997/6279/6688/7054/7412                                                      | 2<br>2 |
| B<br>P | GO:00<br>21988 | olfactory<br>lobe<br>developmen<br>t             | 6/926      | 31/17913      | 0.<br>00<br>45<br>48<br>93<br>3 | 0.<br>02<br>53<br>39<br>05<br>8 | 0.018700878 | 1436/1749/8320/120892/6091/10371                                                                                                                              | 6      |
| B<br>P | GO:00<br>35587 | purinergic<br>receptor<br>signaling<br>pathway   | 6/926      | 31/17913      | 0.<br>00<br>45<br>48<br>93<br>3 | 0.<br>02<br>53<br>39<br>05<br>8 | 0.018700878 | 100/29909/5027/27334/5029/5031                                                                                                                                | 6      |
| B<br>P | GO:00<br>99175 | regulation of<br>postsynaps<br>e<br>organization | 12/92<br>6 | 98/17913      | 0.<br>00<br>45<br>94<br>97<br>3 | 0.<br>02<br>53<br>52<br>67<br>8 | 0.01871093  | 348/2213/2904/3556/10288/4038/120892/4897/5063/55607/5649/80725                                                                                               | 1<br>2 |
| B<br>P | GO:00<br>33622 | integrin<br>activation                           | 5/926      | 22/17913      | 0.<br>00<br>46<br>05            | 0.<br>02<br>53<br>52            | 0.01871093  | 10563/83706/51237/5341/6403                                                                                                                                   | 5      |

|        |                |                                                              |       |          |                                 |                                 |            |                            |   |
|--------|----------------|--------------------------------------------------------------|-------|----------|---------------------------------|---------------------------------|------------|----------------------------|---|
|        |                |                                                              |       |          | 62<br>5                         | 67<br>8                         |            |                            |   |
| B<br>P | GO:00<br>35590 | purinergic<br>nucleotide<br>receptor<br>signaling<br>pathway | 5/926 | 22/17913 | 0.<br>00<br>46<br>05<br>62<br>5 | 0.<br>02<br>53<br>52<br>67<br>8 | 0.01871093 | 29909/5027/27334/5029/5031 | 5 |
| B<br>P | GO:00<br>43302 | positive<br>regulation of<br>leukocyte<br>degranulation      | 5/926 | 22/17913 | 0.<br>00<br>46<br>05<br>62<br>5 | 0.<br>02<br>53<br>52<br>67<br>8 | 0.01871093 | 2207/3134/3684/3689/6812   | 5 |
| B<br>P | GO:00<br>45117 | azole<br>transport                                           | 5/926 | 22/17913 | 0.<br>00<br>46<br>05<br>62<br>5 | 0.<br>02<br>53<br>52<br>67<br>8 | 0.01871093 | 100/695/1906/80704/6581    | 5 |
| B<br>P | GO:00<br>48305 | immunoglobulin<br>secretion                                  | 5/926 | 22/17913 | 0.<br>00<br>46<br>05<br>62<br>5 | 0.<br>02<br>53<br>52<br>67<br>8 | 0.01871093 | 933/90865/3569/54900/10673 | 5 |
| B<br>P | GO:00<br>50927 | positive<br>regulation of<br>positive<br>chemotaxis          | 5/926 | 22/17913 | 0.<br>00<br>46<br>05<br>62<br>5 | 0.<br>02<br>53<br>52<br>67<br>8 | 0.01871093 | 1233/3576/2152/3603/7422   | 5 |
| B<br>P | GO:00<br>50995 | negative<br>regulation of<br>lipid<br>catabolic<br>process   | 5/926 | 22/17913 | 0.<br>00<br>46<br>05<br>62      | 0.<br>02<br>53<br>52<br>67      | 0.01871093 | 150/341/3553/5140/5294     | 5 |

|        |                |                                                                                                 |            |          |                                 |                                 |            |                                                              |        |
|--------|----------------|-------------------------------------------------------------------------------------------------|------------|----------|---------------------------------|---------------------------------|------------|--------------------------------------------------------------|--------|
|        |                |                                                                                                 |            |          | 5                               | 8                               |            |                                                              |        |
| B<br>P | GO:19<br>00016 | negative<br>regulation of<br>cytokine<br>production<br>involved in<br>inflammator<br>y response | 5/926      | 22/17913 | 0.<br>00<br>46<br>05<br>62<br>5 | 0.<br>02<br>53<br>52<br>67<br>8 | 0.01871093 | 113/7850/4210/197358/140885                                  | 5      |
| B<br>P | GO:00<br>06692 | prostanoid<br>metabolic<br>process                                                              | 7/926      | 41/17913 | 0.<br>00<br>46<br>43<br>98<br>3 | 0.<br>02<br>53<br>52<br>67<br>8 | 0.01871093 | 972/1906/2171/3553/5730/5742/6916                            | 7      |
| B<br>P | GO:00<br>06693 | prostaglandi<br>n metabolic<br>process                                                          | 7/926      | 41/17913 | 0.<br>00<br>46<br>43<br>98<br>3 | 0.<br>02<br>53<br>52<br>67<br>8 | 0.01871093 | 972/1906/2171/3553/5730/5742/6916                            | 7      |
| B<br>P | GO:00<br>50830 | defense<br>response to<br>Gram-positi<br>ve<br>bacterium                                        | 11/92<br>6 | 86/17913 | 0.<br>00<br>46<br>77<br>18<br>4 | 0.<br>02<br>53<br>52<br>67<br>8 | 0.01871093 | 54/728/948/84868/3569/4069/219972/114548/5027/55576/7<br>097 | 1<br>1 |
| B<br>P | GO:19<br>03725 | regulation of<br>phospholipi<br>d metabolic<br>process                                          | 11/92<br>6 | 86/17913 | 0.<br>00<br>46<br>77<br>18<br>4 | 0.<br>02<br>53<br>52<br>67<br>8 | 0.01871093 | 341/6363/6366/1236/930/2261/2322/2358/64127/23533/902<br>1   | 1<br>1 |
| B<br>P | GO:00<br>02523 | leukocyte<br>migration<br>involved in<br>inflammator<br>y response                              | 4/926      | 14/17913 | 0.<br>00<br>46<br>81<br>41      | 0.<br>02<br>53<br>52<br>67      | 0.01871093 | 3689/6279/6401/56833                                         | 4      |

|        |                |                                                              |       |          |                                 |                                 |            |                        |   |
|--------|----------------|--------------------------------------------------------------|-------|----------|---------------------------------|---------------------------------|------------|------------------------|---|
|        |                |                                                              |       |          | 8                               | 8                               |            |                        |   |
| B<br>P | GO:00<br>06837 | serotonin<br>transport                                       | 4/926 | 14/17913 | 0.<br>00<br>46<br>81<br>41<br>8 | 0.<br>02<br>53<br>52<br>67<br>8 | 0.01871093 | 2207/10859/4129/6622   | 4 |
| B<br>P | GO:00<br>06910 | phagocytosis,<br>recognition                                 | 4/926 | 14/17913 | 0.<br>00<br>46<br>81<br>41<br>8 | 0.<br>02<br>53<br>52<br>67<br>8 | 0.01871093 | 575/948/64581/2219     | 4 |
| B<br>P | GO:00<br>10820 | positive<br>regulation of<br>T cell<br>chemotaxis            | 4/926 | 14/17913 | 0.<br>00<br>46<br>81<br>41<br>8 | 0.<br>02<br>53<br>52<br>67<br>8 | 0.01871093 | 6366/6352/729230/10563 | 4 |
| B<br>P | GO:00<br>14048 | regulation of<br>glutamate<br>secretion                      | 4/926 | 14/17913 | 0.<br>00<br>46<br>81<br>41<br>8 | 0.<br>02<br>53<br>52<br>67<br>8 | 0.01871093 | 8564/5027/6622/6812    | 4 |
| B<br>P | GO:00<br>32310 | prostaglandin<br>secretion                                   | 4/926 | 14/17913 | 0.<br>00<br>46<br>81<br>41<br>8 | 0.<br>02<br>53<br>52<br>67<br>8 | 0.01871093 | 1906/3553/5027/8600    | 4 |
| B<br>P | GO:00<br>35589 | G<br>protein-coupled<br>purinergic<br>nucleotide<br>receptor | 4/926 | 14/17913 | 0.<br>00<br>46<br>81<br>41<br>8 | 0.<br>02<br>53<br>52<br>67<br>8 | 0.01871093 | 29909/27334/5029/5031  | 4 |

|        |                |                                                                  |       |          |                                 |                                 |            |                       |   |
|--------|----------------|------------------------------------------------------------------|-------|----------|---------------------------------|---------------------------------|------------|-----------------------|---|
|        |                | signaling pathway                                                |       |          |                                 |                                 |            |                       |   |
| B<br>P | GO:00<br>42033 | chemokine biosynthetic process                                   | 4/926 | 14/17913 | 0.<br>00<br>46<br>81<br>41<br>8 | 0.<br>02<br>53<br>52<br>67<br>8 | 0.01871093 | 1958/3162/3553/3569   | 4 |
| B<br>P | GO:00<br>45953 | negative regulation of natural killer cell mediated cytotoxicity | 4/926 | 14/17913 | 0.<br>00<br>46<br>81<br>41<br>8 | 0.<br>02<br>53<br>52<br>67<br>8 | 0.01871093 | 84868/3134/10859/5272 | 4 |
| B<br>P | GO:00<br>50755 | chemokine metabolic process                                      | 4/926 | 14/17913 | 0.<br>00<br>46<br>81<br>41<br>8 | 0.<br>02<br>53<br>52<br>67<br>8 | 0.01871093 | 1958/3162/3553/3569   | 4 |
| B<br>P | GO:00<br>60099 | regulation of phagocytosis, engulfment                           | 4/926 | 14/17913 | 0.<br>00<br>46<br>81<br>41<br>8 | 0.<br>02<br>53<br>52<br>67<br>8 | 0.01871093 | 718/948/3071/26228    | 4 |
| B<br>P | GO:00<br>70669 | response to interleukin-2                                        | 4/926 | 14/17913 | 0.<br>00<br>46<br>81<br>41<br>8 | 0.<br>02<br>53<br>52<br>67<br>8 | 0.01871093 | 3559/3560/3561/3718   | 4 |
| B<br>P | GO:00<br>97202 | activation of cysteine-type endopeptidase activity               | 4/926 | 14/17913 | 0.<br>00<br>46<br>81<br>41      | 0.<br>02<br>53<br>52<br>67      | 0.01871093 | 26999/2903/3428/64065 | 4 |

|        |                |                                                                |            |               |                                 |                                 |             |                                                                                                                                                                   |        |
|--------|----------------|----------------------------------------------------------------|------------|---------------|---------------------------------|---------------------------------|-------------|-------------------------------------------------------------------------------------------------------------------------------------------------------------------|--------|
|        |                |                                                                |            |               | 8                               | 8                               |             |                                                                                                                                                                   |        |
| B<br>P | GO:00<br>51271 | negative<br>regulation of<br>cellular<br>component<br>movement | 31/92<br>6 | 365/1791<br>3 | 0.<br>00<br>47<br>00<br>49<br>9 | 0.<br>02<br>54<br>28<br>84<br>6 | 0.018767144 | 100/56999/575/84830/199/348/274/6347/6366/999/10563/1800/1843/83481/3162/8519/11009/90865/79772/3084/11240/5365/10891/5800/9750/6091/10371/56833/50859/26228/7454 | 3<br>1 |
| B<br>P | GO:19<br>01654 | response to<br>ketone                                          | 19/92<br>6 | 191/1791<br>3 | 0.<br>00<br>48<br>18<br>96<br>4 | 0.<br>02<br>60<br>41<br>92<br>7 | 0.019219614 | 5244/107/768/6363/6366/1236/952/1536/1829/1843/1906/3383/4129/11184/4478/5031/6696/7054/7097                                                                      | 1<br>9 |
| B<br>P | GO:00<br>51495 | positive<br>regulation of<br>cytoskeleton<br>organization      | 20/92<br>6 | 205/1791<br>3 | 0.<br>00<br>48<br>38<br>57<br>8 | 0.<br>02<br>61<br>20<br>07<br>7 | 0.01927729  | 274/146206/6366/1236/11151/1906/342184/8477/3055/3059/3304/3383/10788/3071/4868/5027/5341/6281/26228/7454                                                         | 2<br>0 |
| B<br>P | GO:19<br>05952 | regulation of<br>lipid<br>localization                         | 16/92<br>6 | 151/1791<br>3 | 0.<br>00<br>50<br>80<br>49<br>3 | 0.<br>02<br>73<br>96<br>82<br>6 | 0.020219564 | 5244/341/348/10396/718/948/1071/1906/29923/3553/3569/4023/4481/5027/6696/8600                                                                                     | 1<br>6 |
| B<br>P | GO:00<br>32606 | type I<br>interferon<br>production                             | 14/92<br>6 | 125/1791<br>3 | 0.<br>00<br>52<br>11<br>47<br>4 | 0.<br>02<br>80<br>73<br>28<br>3 | 0.020718807 | 84868/51191/3428/10859/4321/197358/84166/26191/140885/7097/51284/51311/7128/81030                                                                                 | 1<br>4 |
| B<br>P | GO:00<br>15849 | organic acid<br>transport                                      | 26/92<br>6 | 293/1791<br>3 | 0.<br>00<br>52<br>41<br>81<br>9 | 0.<br>02<br>81<br>76<br>86<br>1 | 0.02079525  | 5244/348/366/948/1906/2350/3553/8564/4948/5027/26279/8497/5997/6556/117247/6507/375611/159963/6538/6535/6545/9056/6622/6812/8600/9256                             | 2<br>6 |



|        |                |                                                           |            |               |                                 |                                 |             |                                                                                                                                                          |        |
|--------|----------------|-----------------------------------------------------------|------------|---------------|---------------------------------|---------------------------------|-------------|----------------------------------------------------------------------------------------------------------------------------------------------------------|--------|
| B<br>P | GO:00<br>46942 | carboxylic<br>acid<br>transport                           | 26/92<br>6 | 293/1791<br>3 | 0.<br>00<br>52<br>41<br>81<br>9 | 0.<br>02<br>81<br>76<br>86<br>1 | 0.02079525  | 5244/348/366/948/1906/2350/3553/8564/4948/5027/26279/8<br>497/5997/6556/117247/6507/375611/159963/6538/6535/654<br>5/9056/6622/6812/8600/9256            | 2<br>6 |
| B<br>P | GO:00<br>51604 | protein<br>maturation                                     | 30/92<br>6 | 353/1791<br>3 | 0.<br>00<br>53<br>13<br>94<br>6 | 0.<br>02<br>85<br>34<br>31<br>6 | 0.02105906  | 712/713/714/717/718/719/720/721/728/730/147372/930/629/<br>3426/1378/1380/26999/2152/2903/3428/3553/7850/5653/12<br>0892/5027/64065/710/5552/55061/11326 | 3<br>0 |
| B<br>P | GO:00<br>10863 | positive<br>regulation of<br>phospholipa<br>se C activity | 7/926      | 42/17913      | 0.<br>00<br>53<br>29<br>39<br>4 | 0.<br>02<br>85<br>56<br>76<br>4 | 0.021075628 | 728/2099/3702/5031/5330/6401/7294                                                                                                                        | 7      |
| B<br>P | GO:00<br>14047 | glutamate<br>secretion                                    | 7/926      | 42/17913      | 0.<br>00<br>53<br>29<br>39<br>4 | 0.<br>02<br>85<br>56<br>76<br>4 | 0.021075628 | 8564/5027/8497/6507/6622/6812/9256                                                                                                                       | 7      |
| B<br>P | GO:00<br>43409 | negative<br>regulation of<br>MAPK<br>cascade              | 18/92<br>6 | 179/1791<br>3 | 0.<br>00<br>53<br>44<br>15<br>5 | 0.<br>02<br>86<br>05<br>62<br>1 | 0.021111685 | 348/467/655/1843/2048/2633/3553/11213/54900/5027/5187/<br>26191/5788/5997/27330/57556/140885/7345                                                        | 1<br>8 |
| B<br>P | GO:00<br>09164 | nucleoside<br>catabolic<br>process                        | 6/926      | 32/17913      | 0.<br>00<br>53<br>58<br>41<br>1 | 0.<br>02<br>86<br>21<br>48<br>2 | 0.021123392 | 100/51816/978/1806/4907/1890                                                                                                                             | 6      |
| B      | GO:00          | myeloid cell                                              | 6/926      | 32/17913      | 0.                              | 0.                              | 0.021123392 | 6352/1514/2207/3569/64127/5293                                                                                                                           | 6      |

|        |                |                                                                                             |        |           |                                 |                                 |             |                                                                                                                        |        |
|--------|----------------|---------------------------------------------------------------------------------------------|--------|-----------|---------------------------------|---------------------------------|-------------|------------------------------------------------------------------------------------------------------------------------|--------|
| P      | 33028          | apoptotic process                                                                           |        |           | 00<br>53<br>58<br>41<br>1       | 02<br>86<br>21<br>48<br>2       |             |                                                                                                                        |        |
| B<br>P | GO:00<br>60135 | maternal process involved in female pregnancy                                               | 9/926  | 64/17913  | 0.<br>00<br>54<br>13<br>83<br>6 | 0.<br>02<br>88<br>87<br>09      | 0.021319417 | 113/1829/2099/84868/3675/4316/639/5997/6696                                                                            | 9      |
| B<br>P | GO:00<br>90596 | sensory organ morphogenesis                                                                 | 23/926 | 250/17913 | 0.<br>00<br>54<br>38<br>13<br>3 | 0.<br>02<br>89<br>86<br>22      | 0.021392578 | 655/50937/56603/1749/1906/2048/2201/26018/4647/5818/8013/9423/639/9750/54549/84189/6662/64220/6899/7020/7054/7068/7422 | 2<br>3 |
| B<br>P | GO:00<br>02433 | immune response-regulating cell surface receptor signaling pathway involved in phagocytosis | 15/926 | 139/17913 | 0.<br>00<br>55<br>35<br>94<br>1 | 0.<br>02<br>93<br>92<br>59<br>5 | 0.021692493 | 919/917/26999/9844/2209/2212/2213/2214/3055/64005/3071/5788/7409/7454/7456                                             | 1<br>5 |
| B<br>P | GO:00<br>38096 | Fc-gamma receptor signaling pathway involved in phagocytosis                                | 15/926 | 139/17913 | 0.<br>00<br>55<br>35<br>94<br>1 | 0.<br>02<br>93<br>92<br>59<br>5 | 0.021692493 | 919/917/26999/9844/2209/2212/2213/2214/3055/64005/3071/5788/7409/7454/7456                                             | 1<br>5 |
| B<br>P | GO:00<br>51384 | response to glucocorticoid                                                                  | 15/926 | 139/17913 | 0.<br>00<br>55                  | 0.<br>02<br>93                  | 0.021692493 | 21/23205/199/249/301/374/1843/1906/2322/3383/3569/4129/5069/7054/7538                                                  | 1<br>5 |

|        |                |                                                          |            |               |                                 |                                 |             |                                                                                                                                                         |        |
|--------|----------------|----------------------------------------------------------|------------|---------------|---------------------------------|---------------------------------|-------------|---------------------------------------------------------------------------------------------------------------------------------------------------------|--------|
|        |                |                                                          |            |               | 35<br>94<br>1                   | 92<br>59<br>5                   |             |                                                                                                                                                         |        |
| B<br>P | GO:00<br>01655 | urogenital<br>system<br>developmen<br>t                  | 28/92<br>6 | 324/1791<br>3 | 0.<br>00<br>55<br>42<br>86<br>7 | 0.<br>02<br>93<br>92<br>59<br>5 | 0.021692493 | 384/655/1285/1286/1396/56603/1958/2048/2099/342184/22<br>97/2650/3400/3675/3691/4038/120892/4318/4868/5017/580<br>0/5979/5268/6662/64220/7020/8626/7422 | 2<br>8 |
| B<br>P | GO:00<br>46456 | icosanoid<br>biosynthetic<br>process                     | 8/926      | 53/17913      | 0.<br>00<br>55<br>43<br>36<br>6 | 0.<br>02<br>93<br>92<br>59<br>5 | 0.021692493 | 241/972/1906/2171/3553/5730/5742/6916                                                                                                                   | 8      |
| B<br>P | GO:00<br>70167 | regulation of<br>biomineral<br>tissue<br>developmen<br>t | 11/92<br>6 | 88/17913      | 0.<br>00<br>55<br>75<br>44<br>3 | 0.<br>02<br>95<br>00<br>95<br>9 | 0.021772468 | 84059/655/6348/2201/4057/4745/152816/5027/6662/5552/7<br>020                                                                                            | 1<br>1 |
| B<br>P | GO:19<br>04894 | positive<br>regulation of<br>STAT<br>cascade             | 11/92<br>6 | 88/17913      | 0.<br>00<br>55<br>75<br>44<br>3 | 0.<br>02<br>95<br>00<br>95<br>9 | 0.021772468 | 6352/1436/2261/2322/3059/3587/11009/133396/3569/3575/<br>9021                                                                                           | 1<br>1 |
| B<br>P | GO:00<br>07272 | ensheathme<br>nt of<br>neurons                           | 14/92<br>6 | 126/1791<br>3 | 0.<br>00<br>55<br>92<br>24<br>8 | 0.<br>02<br>95<br>28<br>23<br>5 | 0.021792598 | 23205/7852/1959/23136/2817/3400/3687/3792/5653/10397/<br>3084/7097/1890/7368                                                                            | 1<br>4 |
| B<br>P | GO:00<br>08366 | axon<br>ensheathme<br>nt                                 | 14/92<br>6 | 126/1791<br>3 | 0.<br>00<br>55<br>92            | 0.<br>02<br>95<br>28            | 0.021792598 | 23205/7852/1959/23136/2817/3400/3687/3792/5653/10397/<br>3084/7097/1890/7368                                                                            | 1<br>4 |

|        |                |                                                                            |        |           |                                 |                                 |             |                                                                                                |        |
|--------|----------------|----------------------------------------------------------------------------|--------|-----------|---------------------------------|---------------------------------|-------------|------------------------------------------------------------------------------------------------|--------|
|        |                |                                                                            |        |           | 24<br>8                         | 23<br>5                         |             |                                                                                                |        |
| B<br>P | GO:00<br>10758 | regulation of<br>macrophage<br>chemotaxis                                  | 5/926  | 23/17913  | 0.<br>00<br>56<br>38<br>44<br>3 | 0.<br>02<br>96<br>17<br>89<br>5 | 0.02185877  | 719/728/6352/56833/26228                                                                       | 5      |
| B<br>P | GO:00<br>34123 | positive<br>regulation of<br>toll-like<br>receptor<br>signaling<br>pathway | 5/926  | 23/17913  | 0.<br>00<br>56<br>38<br>44<br>3 | 0.<br>02<br>96<br>17<br>89<br>5 | 0.02185877  | 4057/26191/91543/7096/7097                                                                     | 5      |
| B<br>P | GO:00<br>35588 | G<br>protein-coupled<br>purinergic<br>receptor<br>signaling<br>pathway     | 5/926  | 23/17913  | 0.<br>00<br>56<br>38<br>44<br>3 | 0.<br>02<br>96<br>17<br>89<br>5 | 0.02185877  | 100/29909/27334/5029/5031                                                                      | 5      |
| B<br>P | GO:00<br>50926 | regulation of<br>positive<br>chemotaxis                                    | 5/926  | 23/17913  | 0.<br>00<br>56<br>38<br>44<br>3 | 0.<br>02<br>96<br>17<br>89<br>5 | 0.02185877  | 1233/3576/2152/3603/7422                                                                       | 5      |
| B<br>P | GO:00<br>51968 | positive<br>regulation of<br>synaptic<br>transmission,<br>glutamatergic    | 5/926  | 23/17913  | 0.<br>00<br>56<br>38<br>44<br>3 | 0.<br>02<br>96<br>17<br>89<br>5 | 0.02185877  | 6347/729230/8564/5649/6812                                                                     | 5      |
| B<br>P | GO:00<br>32271 | regulation of<br>protein<br>polymerization                                 | 18/926 | 180/17913 | 0.<br>00<br>56                  | 0.<br>02<br>97                  | 0.021920103 | 119/274/146206/6366/1236/11151/342184/3055/3059/3304/3383/10788/3071/4868/5063/55607/6622/7454 | 1<br>8 |

|        |                |                                                                                    |            |               |                                 |                                 |             |                                                                                                                               |        |
|--------|----------------|------------------------------------------------------------------------------------|------------|---------------|---------------------------------|---------------------------------|-------------|-------------------------------------------------------------------------------------------------------------------------------|--------|
|        |                | on                                                                                 |            |               | 60<br>12<br>3                   | 00<br>99<br>9                   |             |                                                                                                                               |        |
| B<br>P | GO:00<br>31668 | cellular<br>response to<br>extracellular<br>stimulus                               | 23/92<br>6 | 251/1791<br>3 | 0.<br>00<br>57<br>03<br>62<br>2 | 0.<br>02<br>98<br>98<br>30<br>5 | 0.022065719 | 199/467/1536/1824/355/2350/3162/3383/3428/3676/3725/57<br>535/4023/120892/4929/5027/5029/5251/5788/58528/143686<br>/6513/7412 | 2<br>3 |
| B<br>P | GO:00<br>19233 | sensory<br>perception<br>of pain                                                   | 12/92<br>6 | 101/1791<br>3 | 0.<br>00<br>58<br>59<br>61<br>8 | 0.<br>03<br>06<br>84<br>30<br>2 | 0.022645805 | 6347/6348/729230/7852/1906/2171/2903/3218/4886/5027/5<br>4463/7345                                                            | 1<br>2 |
| B<br>P | GO:19<br>04064 | positive<br>regulation of<br>cation<br>transmembr<br>ane<br>transport              | 15/92<br>6 | 140/1791<br>3 | 0.<br>00<br>59<br>12<br>96<br>5 | 0.<br>03<br>09<br>31<br>70<br>3 | 0.022828394 | 6347/729230/930/57214/3627/6373/4283/2048/9722/5031/5<br>649/6622/6769/342667/54209                                           | 1<br>5 |
| B<br>P | GO:00<br>45471 | response to<br>ethanol                                                             | 14/92<br>6 | 127/1791<br>3 | 0.<br>00<br>59<br>95<br>05<br>9 | 0.<br>03<br>13<br>05<br>92<br>6 | 0.02310458  | 113/929/939/1536/2903/2904/3359/3383/4129/5997/6279/66<br>88/7054/7412                                                        | 1<br>4 |
| B<br>P | GO:00<br>35924 | cellular<br>response to<br>vascular<br>endothelial<br>growth<br>factor<br>stimulus | 9/926      | 65/17913      | 0.<br>00<br>60<br>03<br>03      | 0.<br>03<br>13<br>05<br>92<br>6 | 0.02310458  | 301/147372/1960/2322/3164/6091/57556/7412/7422                                                                                | 9      |
| B<br>P | GO:00<br>48864 | stem cell<br>developmen<br>t                                                       | 9/926      | 65/17913      | 0.<br>00<br>60                  | 0.<br>03<br>13                  | 0.02310458  | 655/1906/3084/5788/5979/10371/6662/6899/9839                                                                                  | 9      |

|        |                |                                                                                              |       |          |                                 |                                 |           |                                     |   |
|--------|----------------|----------------------------------------------------------------------------------------------|-------|----------|---------------------------------|---------------------------------|-----------|-------------------------------------|---|
|        |                |                                                                                              |       |          | 03<br>03                        | 05<br>92<br>6                   |           |                                     |   |
| B<br>P | GO:00<br>51602 | response to<br>electrical<br>stimulus                                                        | 7/926 | 43/17913 | 0.<br>00<br>60<br>87<br>92      | 0.<br>03<br>16<br>19<br>89<br>8 | 0.0233363 | 122622/199/929/1917/5027/10891/7054 | 7 |
| B<br>P | GO:00<br>02693 | positive<br>regulation of<br>cellular<br>extravasatio<br>n                                   | 4/926 | 15/17913 | 0.<br>00<br>61<br>25<br>61<br>5 | 0.<br>03<br>16<br>19<br>89<br>8 | 0.0233363 | 729230/3383/3676/9750               | 4 |
| B<br>P | GO:00<br>15732 | prostaglandi<br>n transport                                                                  | 4/926 | 15/17913 | 0.<br>00<br>61<br>25<br>61<br>5 | 0.<br>03<br>16<br>19<br>89<br>8 | 0.0233363 | 1906/3553/5027/8600                 | 4 |
| B<br>P | GO:00<br>32645 | regulation of<br>granulocyte<br>macrophage<br>colony-stim<br>ulating<br>factor<br>production | 4/926 | 15/17913 | 0.<br>00<br>61<br>25<br>61<br>5 | 0.<br>03<br>16<br>19<br>89<br>8 | 0.0233363 | 941/8832/3553/10125                 | 4 |
| B<br>P | GO:00<br>32736 | positive<br>regulation of<br>interleukin-1<br>3 production                                   | 4/926 | 15/17913 | 0.<br>00<br>61<br>25<br>61<br>5 | 0.<br>03<br>16<br>19<br>89<br>8 | 0.0233363 | 3556/90865/3662/114548              | 4 |
| B<br>P | GO:00<br>42535 | positive<br>regulation of<br>tumor                                                           | 4/926 | 15/17913 | 0.<br>00<br>61                  | 0.<br>03<br>16                  | 0.0233363 | 729230/1536/7096/7305               | 4 |

|        |                |                                                             |            |          |                                 |                                 |            |                                                       |        |
|--------|----------------|-------------------------------------------------------------|------------|----------|---------------------------------|---------------------------------|------------|-------------------------------------------------------|--------|
|        |                | necrosis factor biosynthetic process                        |            |          | 25<br>61<br>5                   | 19<br>89<br>8                   |            |                                                       |        |
| B<br>P | GO:19<br>00451 | positive regulation of glutamate receptor signaling pathway | 4/926      | 15/17913 | 0.<br>00<br>61<br>25<br>61<br>5 | 0.<br>03<br>16<br>19<br>89<br>8 | 0.0233363  | 6347/729230/2048/5649                                 | 4      |
| B<br>P | GO:19<br>01741 | positive regulation of myoblast fusion                      | 4/926      | 15/17913 | 0.<br>00<br>61<br>25<br>61<br>5 | 0.<br>03<br>16<br>19<br>89<br>8 | 0.0233363  | 575/963/4283/9750                                     | 4      |
| B<br>P | GO:19<br>05153 | regulation of membrane invagination                         | 4/926      | 15/17913 | 0.<br>00<br>61<br>25<br>61<br>5 | 0.<br>03<br>16<br>19<br>89<br>8 | 0.0233363  | 718/948/3071/26228                                    | 4      |
| B<br>P | GO:20<br>00402 | negative regulation of lymphocyte migration                 | 4/926      | 15/17913 | 0.<br>00<br>61<br>25<br>61<br>5 | 0.<br>03<br>16<br>19<br>89<br>8 | 0.0233363  | 84830/6347/11240/9750                                 | 4      |
| B<br>P | GO:00<br>34109 | homotypic cell-cell adhesion                                | 10/92<br>6 | 77/17913 | 0.<br>00<br>61<br>45<br>74<br>2 | 0.<br>03<br>16<br>27<br>17<br>5 | 0.02334167 | 6352/1525/1824/1829/83706/5294/5341/5588/6812/8600    | 1<br>0 |
| B<br>P | GO:00<br>60761 | negative regulation of response to                          | 10/92<br>6 | 77/17913 | 0.<br>00<br>61                  | 0.<br>03<br>16                  | 0.02334167 | 6352/7850/3569/11213/4321/84166/11240/5788/6091/26228 | 1<br>0 |

|        |                |                                                           |            |               |                                 |                                 |             |                                                                            |        |
|--------|----------------|-----------------------------------------------------------|------------|---------------|---------------------------------|---------------------------------|-------------|----------------------------------------------------------------------------|--------|
|        |                | cytokine stimulus                                         |            |               | 45<br>74<br>2                   | 27<br>17<br>5                   |             |                                                                            |        |
| B<br>P | GO:00<br>71260 | cellular response to mechanical stimulus                  | 10/92<br>6 | 77/17913      | 0.<br>00<br>61<br>45<br>74<br>2 | 0.<br>03<br>16<br>27<br>17<br>5 | 0.02334167  | 27063/355/2729/3553/4316/9750/6513/6662/51284/51311                        | 1<br>0 |
| B<br>P | GO:00<br>10524 | positive regulation of calcium ion transport into cytosol | 8/926      | 54/17913      | 0.<br>00<br>62<br>19<br>70<br>8 | 0.<br>03<br>19<br>42<br>95<br>6 | 0.023574725 | 930/57214/3627/6373/4283/5027/5031/6622                                    | 8      |
| B<br>P | GO:00<br>60760 | positive regulation of response to cytokine stimulus      | 8/926      | 54/17913      | 0.<br>00<br>62<br>19<br>70<br>8 | 0.<br>03<br>19<br>42<br>95<br>6 | 0.023574725 | 972/1906/3304/4321/84166/7097/54209/7294                                   | 8      |
| B<br>P | GO:00<br>32892 | positive regulation of organic acid transport             | 6/926      | 33/17913      | 0.<br>00<br>62<br>68<br>43<br>1 | 0.<br>03<br>21<br>60<br>60<br>5 | 0.023735356 | 1906/3553/8564/5027/6812/8600                                              | 6      |
| B<br>P | GO:00<br>38094 | Fc-gamma receptor signaling pathway                       | 15/92<br>6 | 141/1791<br>3 | 0.<br>00<br>63<br>10<br>40<br>8 | 0.<br>03<br>23<br>43<br>23<br>6 | 0.023870141 | 919/917/26999/9844/2209/2212/2213/2214/3055/64005/3071/5788/7409/7454/7456 | 1<br>5 |
| B<br>P | GO:00<br>06690 | icosanoid metabolic process                               | 12/92<br>6 | 102/1791<br>3 | 0.<br>00<br>63<br>37            | 0.<br>03<br>24<br>49            | 0.023948579 | 241/972/1557/1573/1800/1906/2171/3553/5730/5742/6916/7097                  | 1<br>2 |



|        |                |                                                                      |            |               |                                 |                                 |             |                                                                                |        |
|--------|----------------|----------------------------------------------------------------------|------------|---------------|---------------------------------|---------------------------------|-------------|--------------------------------------------------------------------------------|--------|
|        |                |                                                                      |            |               | 54<br>6                         | 51<br>6                         |             |                                                                                |        |
| B<br>P | GO:00<br>31960 | response to<br>corticosteroid                                        | 16/92<br>6 | 155/1791<br>3 | 0.<br>00<br>65<br>22<br>69<br>3 | 0.<br>03<br>33<br>63<br>80<br>7 | 0.024623349 | 21/23205/199/249/301/374/1536/1843/1906/2322/3383/3569<br>/4129/5069/7054/7538 | 1<br>6 |
| B<br>P | GO:00<br>61387 | regulation of<br>extent of cell<br>growth                            | 11/92<br>6 | 90/17913      | 0.<br>00<br>66<br>04<br>38<br>7 | 0.<br>03<br>37<br>47<br>62      | 0.024906613 | 348/1630/23105/3897/23566/4897/9423/10439/10371/6696/<br>7422                  | 1<br>1 |
| B<br>P | GO:00<br>22617 | extracellular<br>matrix<br>disassembly                               | 10/92<br>6 | 78/17913      | 0.<br>00<br>67<br>31<br>91<br>7 | 0.<br>03<br>43<br>64<br>64<br>1 | 0.025361991 | 146206/960/1514/1803/3569/5650/3936/4321/4316/4318                             | 1<br>0 |
| B<br>P | GO:00<br>21952 | central<br>nervous<br>system<br>projection<br>neuron<br>axonogenesis | 5/926      | 24/17913      | 0.<br>00<br>68<br>24<br>33<br>2 | 0.<br>03<br>47<br>31<br>46<br>7 | 0.025632718 | 1630/9201/4781/4929/9839                                                       | 5      |
| B<br>P | GO:00<br>33081 | regulation of<br>T cell<br>differentiation<br>in thymus              | 5/926      | 24/17913      | 0.<br>00<br>68<br>24<br>33<br>2 | 0.<br>03<br>47<br>31<br>46<br>7 | 0.025632718 | 100/1960/3575/10125/9840                                                       | 5      |
| B<br>P | GO:00<br>42481 | regulation of<br>odontogenesis                                       | 5/926      | 24/17913      | 0.<br>00<br>68<br>24            | 0.<br>03<br>47<br>31            | 0.025632718 | 1906/152816/860/7020/4982                                                      | 5      |

|        |                |                                                            |            |               |                                 |                                 |             |                                                                                                                                                        |        |
|--------|----------------|------------------------------------------------------------|------------|---------------|---------------------------------|---------------------------------|-------------|--------------------------------------------------------------------------------------------------------------------------------------------------------|--------|
|        |                |                                                            |            |               | 33<br>2                         | 46<br>7                         |             |                                                                                                                                                        |        |
| B<br>P | GO:19<br>04892 | regulation of<br>STAT<br>cascade                           | 14/92<br>6 | 129/1791<br>3 | 0.<br>00<br>68<br>70<br>35<br>7 | 0.<br>03<br>49<br>30<br>62<br>9 | 0.025779705 | 6352/1436/2261/2322/3059/3587/11009/133396/3569/3575/<br>3718/5788/5979/9021                                                                           | 1<br>4 |
| B<br>P | GO:00<br>32273 | positive<br>regulation of<br>protein<br>polymerizati<br>on | 13/92<br>6 | 116/1791<br>3 | 0.<br>00<br>69<br>20<br>42<br>4 | 0.<br>03<br>50<br>63<br>27<br>7 | 0.025877602 | 274/146206/6366/1236/11151/342184/3055/3304/3383/1078<br>8/3071/4868/7454                                                                              | 1<br>3 |
| B<br>P | GO:00<br>01754 | eye<br>photorecept<br>or cell<br>differentiatio<br>n       | 7/926      | 44/17913      | 0.<br>00<br>69<br>24<br>11<br>5 | 0.<br>03<br>50<br>63<br>27<br>7 | 0.025877602 | 4647/639/54549/6662/7054/7068/7422                                                                                                                     | 7      |
| B<br>P | GO:00<br>30850 | prostate<br>gland<br>developmen<br>t                       | 7/926      | 44/17913      | 0.<br>00<br>69<br>24<br>11<br>5 | 0.<br>03<br>50<br>63<br>27<br>7 | 0.025877602 | 655/1396/2099/3400/5268/6662/8626                                                                                                                      | 7      |
| B<br>P | GO:19<br>00274 | regulation of<br>phospholipa<br>se C activity              | 7/926      | 44/17913      | 0.<br>00<br>69<br>24<br>11<br>5 | 0.<br>03<br>50<br>63<br>27<br>7 | 0.025877602 | 728/2099/3702/5031/5330/6401/7294                                                                                                                      | 7      |
| B<br>P | GO:00<br>01101 | response to<br>acid<br>chemical                            | 28/92<br>6 | 330/1791<br>3 | 0.<br>00<br>70<br>72<br>08      | 0.<br>03<br>57<br>76<br>84      | 0.026404236 | 5244/6363/6366/1236/948/952/1536/56603/1843/1906/1958/<br>2350/2729/2707/3383/3856/4023/5031/10891/5979/58528/3<br>75611/6662/6899/8463/7054/7097/7422 | 2<br>8 |

|        |                |                                                                                 |            |               |                                 |                                 |             |                                                                                                                                                                  |        |
|--------|----------------|---------------------------------------------------------------------------------|------------|---------------|---------------------------------|---------------------------------|-------------|------------------------------------------------------------------------------------------------------------------------------------------------------------------|--------|
| B<br>P | GO:00<br>42531 | positive<br>regulation of<br>tyrosine<br>phosphoryla<br>tion of STAT<br>protein | 9/926      | 67/17913      | 0.<br>00<br>73<br>28<br>41<br>2 | 0.<br>03<br>70<br>36<br>61<br>1 | 0.027333974 | 6352/1436/2261/2322/3059/11009/133396/3569/9021                                                                                                                  | 9      |
| B<br>P | GO:00<br>06766 | vitamin<br>metabolic<br>process                                                 | 14/92<br>6 | 130/1791<br>3 | 0.<br>00<br>73<br>44<br>66<br>3 | 0.<br>03<br>70<br>81<br>77      | 0.027367302 | 54/316/8029/56603/1593/2350/2729/3553/8564/5947/80704/<br>6513/6515/8875                                                                                         | 1<br>4 |
| B<br>P | GO:00<br>02761 | regulation of<br>myeloid<br>leukocyte<br>differentiatio<br>n                    | 13/92<br>6 | 117/1791<br>3 | 0.<br>00<br>74<br>28<br>31<br>7 | 0.<br>03<br>74<br>66<br>80<br>2 | 0.027651466 | 714/6348/972/1021/2124/3059/3725/10859/11006/4057/860<br>0/54209/7305                                                                                            | 1<br>3 |
| B<br>P | GO:19<br>02905 | positive<br>regulation of<br>supramolec<br>ular fiber<br>organization           | 18/92<br>6 | 185/1791<br>3 | 0.<br>00<br>74<br>76<br>79<br>4 | 0.<br>03<br>76<br>73<br>82<br>6 | 0.027804254 | 348/274/146206/6366/1236/11151/1906/342184/8477/3055/<br>3304/3383/10788/3071/4868/5341/6281/7454                                                                | 1<br>8 |
| B<br>P | GO:20<br>00146 | negative<br>regulation of<br>cell motility                                      | 29/92<br>6 | 347/1791<br>3 | 0.<br>00<br>75<br>98<br>43<br>6 | 0.<br>03<br>82<br>48<br>73<br>1 | 0.028228549 | 100/56999/575/84830/199/348/6347/6366/999/10563/1800/1<br>843/83481/3162/8519/11009/90865/79772/3084/11240/5365<br>/10891/9750/6091/10371/56833/50859/26228/7454 | 2<br>9 |
| B<br>P | GO:00<br>33619 | membrane<br>protein<br>proteolysis                                              | 8/926      | 56/17913      | 0.<br>00<br>77<br>58<br>04<br>7 | 0.<br>03<br>90<br>13<br>43<br>2 | 0.028792919 | 8728/150/348/3553/4804/5027/5588/5979                                                                                                                            | 8      |

|        |                |                                                                                                                                                                              |       |          |                                 |                            |            |                      |   |
|--------|----------------|------------------------------------------------------------------------------------------------------------------------------------------------------------------------------|-------|----------|---------------------------------|----------------------------|------------|----------------------|---|
| B<br>P | GO:00<br>01916 | positive<br>regulation of<br>T cell<br>mediated<br>cytotoxicity                                                                                                              | 4/926 | 16/17913 | 0.<br>00<br>78<br>37<br>86<br>5 | 0.<br>03<br>91<br>66<br>37 | 0.02890579 | 3134/3594/5027/5788  | 4 |
| B<br>P | GO:00<br>32305 | positive<br>regulation of<br>icosanoid<br>secretion                                                                                                                          | 4/926 | 16/17913 | 0.<br>00<br>78<br>37<br>86<br>5 | 0.<br>03<br>91<br>66<br>37 | 0.02890579 | 1906/3553/5027/8600  | 4 |
| B<br>P | GO:00<br>32604 | granulocyte<br>macrophage<br>colony-stim<br>ulating<br>factor<br>production                                                                                                  | 4/926 | 16/17913 | 0.<br>00<br>78<br>37<br>86<br>5 | 0.<br>03<br>91<br>66<br>37 | 0.02890579 | 941/8832/3553/10125  | 4 |
| B<br>P | GO:00<br>36035 | osteoclast<br>developmen<br>t                                                                                                                                                | 4/926 | 16/17913 | 0.<br>00<br>78<br>37<br>86<br>5 | 0.<br>03<br>91<br>66<br>37 | 0.02890579 | 10859/4057/8600/7305 | 4 |
| B<br>P | GO:00<br>51482 | positive<br>regulation of<br>cytosolic<br>calcium ion<br>concentratio<br>n involved in<br>phospholipa<br>se<br>C-activating<br>G<br>protein-coup<br>led signaling<br>pathway | 4/926 | 16/17913 | 0.<br>00<br>78<br>37<br>86<br>5 | 0.<br>03<br>91<br>66<br>37 | 0.02890579 | 719/1906/23566/7052  | 4 |

|        |                |                                                                      |        |           |                                 |                                 |             |                                                                                                  |    |
|--------|----------------|----------------------------------------------------------------------|--------|-----------|---------------------------------|---------------------------------|-------------|--------------------------------------------------------------------------------------------------|----|
| B<br>P | GO:00<br>60192 | negative<br>regulation of<br>lipase<br>activity                      | 4/926  | 16/17913  | 0.<br>00<br>78<br>37<br>86<br>5 | 0.<br>03<br>91<br>66<br>37      | 0.02890579  | 653145/341/9734/5997                                                                             | 4  |
| B<br>P | GO:00<br>35987 | endodermal<br>cell<br>differentiation                                | 7/926  | 45/17913  | 0.<br>00<br>78<br>42<br>54<br>6 | 0.<br>03<br>91<br>66<br>37      | 0.02890579  | 8320/8091/3676/3689/3909/3914/4318                                                               | 7  |
| B<br>P | GO:00<br>07416 | synapse<br>assembly                                                  | 17/926 | 172/17913 | 0.<br>00<br>78<br>87<br>84<br>2 | 0.<br>03<br>93<br>53<br>81      | 0.029044126 | 119/575/2048/3556/4038/266727/5818/4897/3084/9423/55607/54549/22941/84189/6622/9806/7097         | 17 |
| B<br>P | GO:00<br>07584 | response to<br>nutrient                                              | 20/926 | 215/17913 | 0.<br>00<br>81<br>16<br>58<br>4 | 0.<br>04<br>04<br>55<br>22<br>6 | 0.029856999 | 100/249/655/717/916/3627/1536/56603/2350/2729/3162/3553/4023/64127/5027/5029/5251/6696/4982/7412 | 20 |
| B<br>P | GO:00<br>31664 | regulation of<br>lipopolysaccharide-mediated<br>signaling<br>pathway | 5/926  | 25/17913  | 0.<br>00<br>81<br>74<br>13<br>4 | 0.<br>04<br>05<br>42<br>74<br>6 | 0.029921591 | 4064/948/4057/23643/7128                                                                         | 5  |
| B<br>P | GO:00<br>35640 | exploration<br>behavior                                              | 5/926  | 25/17913  | 0.<br>00<br>81<br>74<br>13<br>4 | 0.<br>04<br>05<br>42<br>74<br>6 | 0.029921591 | 348/10752/1803/3675/120892                                                                       | 5  |
| B      | GO:00          | regulation of                                                        | 5/926  | 25/17913  | 0.                              | 0.                              | 0.029921591 | 2069/3553/7096/10333/7305                                                                        | 5  |

|        |                |                                                               |        |          |                                 |                                 |             |                                                           |        |
|--------|----------------|---------------------------------------------------------------|--------|----------|---------------------------------|---------------------------------|-------------|-----------------------------------------------------------|--------|
| P      | 45408          | interleukin-6 biosynthetic process                            |        |          | 00<br>81<br>74<br>13<br>4       | 04<br>05<br>42<br>74<br>6       |             |                                                           |        |
| B<br>P | GO:00<br>60669 | embryonic placenta morphogenesis                              | 5/926  | 25/17913 | 0.<br>00<br>81<br>74<br>13<br>4 | 0.<br>04<br>05<br>42<br>74<br>6 | 0.029921591 | 655/2709/79977/3481/9021                                  | 5      |
| B<br>P | GO:00<br>60740 | prostate gland epithelium morphogenesis                       | 5/926  | 25/17913 | 0.<br>00<br>81<br>74<br>13<br>4 | 0.<br>04<br>05<br>42<br>74<br>6 | 0.029921591 | 655/2099/3400/6662/8626                                   | 5      |
| B<br>P | GO:00<br>10831 | positive regulation of myotube differentiation                | 6/926  | 35/17913 | 0.<br>00<br>84<br>17<br>13<br>5 | 0.<br>04<br>16<br>39<br>33<br>1 | 0.030730899 | 575/963/4283/56603/9750/6899                              | 6      |
| B<br>P | GO:00<br>48710 | regulation of astrocyte differentiation                       | 6/926  | 35/17913 | 0.<br>00<br>84<br>17<br>13<br>5 | 0.<br>04<br>16<br>39<br>33<br>1 | 0.030730899 | 274/712/728/3400/3569/54209                               | 6      |
| B<br>P | GO:00<br>48010 | vascular endothelial growth factor receptor signaling pathway | 11/926 | 93/17913 | 0.<br>00<br>84<br>19<br>86<br>9 | 0.<br>04<br>16<br>39<br>33<br>1 | 0.030730899 | 1536/26999/9844/3553/653361/4688/4689/3071/5579/7409/7422 | 1<br>1 |
| B      | GO:00          | regulation of                                                 | 8/926  | 57/17913 | 0.                              | 0.                              | 0.031454894 | 1906/3553/8564/5027/5997/6622/6812/8600                   | 8      |

|        |                |                                                     |        |           |                                 |                                 |             |                                                                                                                            |        |
|--------|----------------|-----------------------------------------------------|--------|-----------|---------------------------------|---------------------------------|-------------|----------------------------------------------------------------------------------------------------------------------------|--------|
| P      | 32890          | organic acid transport                              |        |           | 00<br>86<br>26<br>64<br>2       | 04<br>26<br>20<br>31<br>9       |             |                                                                                                                            |        |
| B<br>P | GO:00<br>14075 | response to amine                                   | 7/926  | 46/17913  | 0.<br>00<br>88<br>47<br>76<br>9 | 0.<br>04<br>36<br>27<br>76<br>3 | 0.032198413 | 2903/9734/3383/4929/26575/5997/7054                                                                                        | 7      |
| B<br>P | GO:00<br>32480 | negative regulation of type I interferon production | 7/926  | 46/17913  | 0.<br>00<br>88<br>47<br>76<br>9 | 0.<br>04<br>36<br>27<br>76<br>3 | 0.032198413 | 84868/51191/10859/197358/84166/140885/7128                                                                                 | 7      |
| B<br>P | GO:20<br>01259 | positive regulation of cation channel activity      | 9/926  | 69/17913  | 0.<br>00<br>88<br>66<br>38<br>5 | 0.<br>04<br>36<br>77<br>07<br>2 | 0.032234805 | 6347/729230/2048/9722/5031/5649/6769/342667/54209                                                                          | 9      |
| B<br>P | GO:00<br>21537 | telencephalon development                           | 22/926 | 246/17913 | 0.<br>00<br>88<br>93<br>64<br>7 | 0.<br>04<br>37<br>68<br>83<br>1 | 0.032302525 | 306/597/1021/50937/1436/7852/1749/8320/2048/3400/120892/4781/8013/3084/5079/5649/6091/6331/10371/6513/7054/9839            | 2<br>2 |
| B<br>P | GO:00<br>48562 | embryonic organ morphogenesis                       | 24/926 | 276/17913 | 0.<br>00<br>90<br>54<br>03      | 0.<br>04<br>45<br>14<br>91<br>5 | 0.032853155 | 655/50515/1749/1906/2048/2201/79977/3215/3216/3218/26018/4647/8013/9423/5079/9750/860/84189/6662/64220/6899/8463/7020/7054 | 2<br>4 |
| B<br>P | GO:00<br>30316 | osteoclast differentiation                          | 11/926 | 94/17913  | 0.<br>00                        | 0.<br>04                        | 0.033002155 | 6348/135228/1436/2207/1880/10859/11006/4057/8600/54209/7305                                                                | 1<br>1 |

|        |                |                                                    |            |               |                                 |                                 |             |                                                                         |        |
|--------|----------------|----------------------------------------------------|------------|---------------|---------------------------------|---------------------------------|-------------|-------------------------------------------------------------------------|--------|
|        |                | n                                                  |            |               | 91<br>03<br>91<br>5             | 47<br>16<br>80<br>6             |             |                                                                         |        |
| B<br>P | GO:00<br>46425 | regulation of<br>JAK-STAT<br>cascade               | 13/92<br>6 | 120/1791<br>3 | 0.<br>00<br>91<br>30<br>49<br>1 | 0.<br>04<br>48<br>03<br>92<br>8 | 0.033066453 | 6352/1436/2261/2322/3059/3587/11009/133396/3569/3718/<br>5788/5979/9021 | 1<br>3 |
| B<br>P | GO:00<br>07260 | tyrosine<br>phosphoryla<br>tion of STAT<br>protein | 10/92<br>6 | 82/17913      | 0.<br>00<br>95<br>20<br>52<br>7 | 0.<br>04<br>66<br>72<br>68<br>2 | 0.034445642 | 6352/1436/2261/2322/3059/11009/133396/3569/3718/9021                    | 1<br>0 |
| B<br>P | GO:00<br>32370 | positive<br>regulation of<br>lipid<br>transport    | 8/926      | 58/17913      | 0.<br>00<br>95<br>65<br>93<br>3 | 0.<br>04<br>68<br>49<br>96<br>4 | 0.034576481 | 5244/348/10396/1906/3553/5027/6696/8600                                 | 8      |
| B<br>P | GO:00<br>02360 | T cell<br>lineage<br>commitment                    | 5/926      | 26/17913      | 0.<br>00<br>96<br>98<br>30<br>6 | 0.<br>04<br>72<br>46<br>10<br>4 | 0.034868843 | 3594/3569/3662/4063/114836                                              | 5      |
| B<br>P | GO:00<br>02691 | regulation of<br>cellular<br>extravasatio<br>n     | 5/926      | 26/17913      | 0.<br>00<br>96<br>98<br>30<br>6 | 0.<br>04<br>72<br>46<br>10<br>4 | 0.034868843 | 6366/729230/3383/3676/9750                                              | 5      |
| B<br>P | GO:00<br>10996 | response to<br>auditory<br>stimulus                | 5/926      | 26/17913      | 0.<br>00<br>96                  | 0.<br>04<br>72                  | 0.034868843 | 3627/6507/375611/84189/64220                                            | 5      |



|        |                |                                                                                                |            |               |                                 |                                 |             |                                                                                                                 |        |
|--------|----------------|------------------------------------------------------------------------------------------------|------------|---------------|---------------------------------|---------------------------------|-------------|-----------------------------------------------------------------------------------------------------------------|--------|
|        |                |                                                                                                |            |               | 98<br>30<br>6                   | 46<br>10<br>4                   |             |                                                                                                                 |        |
| B<br>P | GO:00<br>32647 | regulation of<br>interferon- $\alpha$<br>production                                            | 5/926      | 26/17913      | 0.<br>00<br>96<br>98<br>30<br>6 | 0.<br>04<br>72<br>46<br>10<br>4 | 0.034868843 | 84868/4321/197358/51284/51311                                                                                   | 5      |
| B<br>P | GO:00<br>34114 | regulation of<br>heterotypic<br>cell-cell<br>adhesion                                          | 5/926      | 26/17913      | 0.<br>00<br>96<br>98<br>30<br>6 | 0.<br>04<br>72<br>46<br>10<br>4 | 0.034868843 | 655/960/2651/3553/3932                                                                                          | 5      |
| B<br>P | GO:00<br>07200 | phospholipa<br>se<br>C-activating<br>G<br>protein-coup<br>led receptor<br>signaling<br>pathway | 9/926      | 70/17913      | 0.<br>00<br>97<br>21<br>38<br>2 | 0.<br>04<br>72<br>46<br>10<br>4 | 0.034868843 | 150/719/1906/2099/2357/23566/5029/5031/7052                                                                     | 9      |
| B<br>P | GO:00<br>60193 | positive<br>regulation of<br>lipase<br>activity                                                | 9/926      | 70/17913      | 0.<br>00<br>97<br>21<br>38<br>2 | 0.<br>04<br>72<br>46<br>10<br>4 | 0.034868843 | 728/6352/2099/2261/3702/5031/5330/6401/7294                                                                     | 9      |
| B<br>P | GO:19<br>04427 | positive<br>regulation of<br>calcium ion<br>transmembr<br>ane<br>transport                     | 9/926      | 70/17913      | 0.<br>00<br>97<br>21<br>38<br>2 | 0.<br>04<br>72<br>46<br>10<br>4 | 0.034868843 | 930/57214/3627/6373/4283/5031/6622/6769/342667                                                                  | 9      |
| B<br>P | GO:00<br>51146 | striated<br>muscle cell                                                                        | 23/92<br>6 | 263/1791<br>3 | 0.<br>00                        | 0.<br>04                        | 0.035080602 | 575/27063/963/50937/1525/3627/4283/56603/1906/9734/34<br>81/3792/688/3856/50804/4868/3084/5997/9750/6899/7273/7 | 2<br>3 |

|        |                |                                                                                          |            |               |                                 |                                 |             |                                                                                   |        |
|--------|----------------|------------------------------------------------------------------------------------------|------------|---------------|---------------------------------|---------------------------------|-------------|-----------------------------------------------------------------------------------|--------|
|        |                | differentiation                                                                          |            |               | 98<br>11<br>95<br>1             | 75<br>33<br>03<br>1             |             | 345/7422                                                                          |        |
| B<br>P | GO:00<br>07188 | adenylate<br>cyclase-modulating G<br>protein-coupled receptor<br>signaling<br>pathway    | 16/92<br>6 | 162/1791<br>3 | 0.<br>00<br>98<br>27<br>50<br>1 | 0.<br>04<br>75<br>33<br>03<br>1 | 0.035080602 | 107/113/150/3627/6373/4283/1906/2357/2358/8477/27201/8<br>685/4886/5996/5997/7253 | 1<br>6 |
| B<br>P | GO:00<br>42472 | inner ear<br>morphogenesis                                                               | 11/92<br>6 | 95/17913      | 0.<br>00<br>98<br>30<br>08<br>8 | 0.<br>04<br>75<br>33<br>03<br>1 | 0.035080602 | 1749/2048/26018/4647/8013/9423/9750/84189/6662/6899/7<br>020                      | 1<br>1 |
| B<br>P | GO:00<br>32930 | positive<br>regulation of<br>superoxide<br>anion<br>generation                           | 4/926      | 17/17913      | 0.<br>00<br>98<br>36<br>68<br>4 | 0.<br>04<br>75<br>33<br>03<br>1 | 0.035080602 | 2358/3684/3689/7305                                                               | 4      |
| B<br>P | GO:00<br>48535 | lymph node<br>development                                                                | 4/926      | 17/17913      | 0.<br>00<br>98<br>36<br>68<br>4 | 0.<br>04<br>75<br>33<br>03<br>1 | 0.035080602 | 3575/4050/124976/9760                                                             | 4      |
| B<br>P | GO:19<br>04996 | positive<br>regulation of<br>leukocyte<br>adhesion to<br>vascular<br>endothelial<br>cell | 4/926      | 17/17913      | 0.<br>00<br>98<br>36<br>68<br>4 | 0.<br>04<br>75<br>33<br>03<br>1 | 0.035080602 | 729230/3383/3676/3689                                                             | 4      |
| B      | GO:00          | positive                                                                                 | 12/92      | 108/1791      | 0.                              | 0.                              | 0.035224677 | 5243/6347/729230/2048/3359/9722/5031/5649/6446/6769/3                             | 1      |

|        |                |                                                            |        |           |                                 |                                 |             |                                                                                                                                                                                                                                                                                                                                                                                     |        |
|--------|----------------|------------------------------------------------------------|--------|-----------|---------------------------------|---------------------------------|-------------|-------------------------------------------------------------------------------------------------------------------------------------------------------------------------------------------------------------------------------------------------------------------------------------------------------------------------------------------------------------------------------------|--------|
| P      | 32411          | regulation of transporter activity                         | 6      | 3         | 00<br>98<br>86<br>49<br>8       | 04<br>77<br>28<br>24<br>8       |             | 42667/54209                                                                                                                                                                                                                                                                                                                                                                         | 2      |
| B<br>P | GO:00<br>01961 | positive regulation of cytokine-mediated signaling pathway | 7/926  | 47/17913  | 0.<br>00<br>99<br>44<br>31<br>5 | 0.<br>04<br>79<br>16<br>09<br>8 | 0.035363315 | 972/1906/3304/4321/84166/54209/7294                                                                                                                                                                                                                                                                                                                                                 | 7      |
| B<br>P | GO:00<br>02832 | negative regulation of response to biotic stimulus         | 7/926  | 47/17913  | 0.<br>00<br>99<br>44<br>31<br>5 | 0.<br>04<br>79<br>16<br>09<br>8 | 0.035363315 | 384/10875/84868/3559/4057/11005/7128                                                                                                                                                                                                                                                                                                                                                | 7      |
| B<br>P | GO:00<br>07269 | neurotransmitter secretion                                 | 15/926 | 149/17913 | 0.<br>01<br>03<br>20<br>38      | 0.<br>04<br>96<br>80<br>91<br>9 | 0.036665799 | 107/321/8938/8564/120892/79772/5027/8497/55607/5579/6622/9627/6812/91683/9256                                                                                                                                                                                                                                                                                                       | 1<br>5 |
| C<br>C | GO:00<br>98552 | side of membrane                                           | 75/939 | 359/18678 | 1.<br>39<br>E-<br>26            | 6.<br>26<br>E-<br>24            | 4.76E-24    | 100/290/301/9914/4059/146206/929/9332/930/914/30835/940/948/916/921/969/972/973/925/999/1493/8029/3627/4283/1917/2152/2208/2213/2214/2219/2350/2811/3055/3105/3106/3107/3113/3115/3118/3119/3120/3122/3123/3125/3134/3136/3383/29851/9173/3559/3560/3561/3575/3675/3684/3689/3902/10859/120892/931/4897/5027/26191/5778/5788/22821/5996/5997/6403/55576/6769/342667/7054/51311/7412 | 7<br>5 |
| C<br>C | GO:00<br>09897 | external side of plasma membrane                           | 48/939 | 199/18678 | 3.<br>73<br>E-<br>20            | 8.<br>39<br>E-<br>18            | 6.38E-18    | 100/290/301/4059/929/9332/930/914/30835/940/948/916/921/969/972/973/925/1493/8029/3627/4283/2152/2208/2213/2214/2219/2350/2811/3383/29851/9173/3559/3560/3561/3575/3675/3684/3689/3902/10859/931/4897/5027/5788/6403/5576/51311/7412                                                                                                                                                | 4<br>8 |
| C<br>C | GO:00<br>42611 | MHC protein complex                                        | 17/939 | 25/18678  | 5.<br>38                        | 8.<br>07                        | 6.13E-15    | 972/3105/3106/3107/3108/3109/3112/3113/3115/3118/3119/3120/3122/3123/3125/3134/3136                                                                                                                                                                                                                                                                                                 | 1<br>7 |

|        |                |                                 |            |               | E-17                 | E-15                 |          |                                                                                                                                                                                                                                                                                                                                                   |        |
|--------|----------------|---------------------------------|------------|---------------|----------------------|----------------------|----------|---------------------------------------------------------------------------------------------------------------------------------------------------------------------------------------------------------------------------------------------------------------------------------------------------------------------------------------------------|--------|
| C<br>C | GO:00<br>30667 | secretory granule membrane      | 53/93<br>9 | 293/1867<br>8 | 3.<br>06<br>E-<br>16 | 3.<br>01<br>E-<br>14 | 2.29E-14 | 21/84658/222487/290/10396/719/728/135228/929/948/952/960/963/160364/1378/3577/1536/8560/2171/2204/2207/2212/2215/2357/2358/11010/3136/10788/3683/3684/3687/3689/3903/27074/10288/3071/150372/4973/51365/5329/5788/5874/54509/6402/6403/140885/10326/6556/6515/6518/6622/7097/7305                                                                 | 5<br>3 |
| C<br>C | GO:00<br>98797 | plasma membrane protein complex | 68/93<br>9 | 451/1867<br>8 | 3.<br>34<br>E-<br>16 | 3.<br>01<br>E-<br>14 | 2.29E-14 | 54518/730/777/919/915/916/917/923/972/973/925/999/1134/1439/1536/355/2707/127534/2709/375519/2903/2904/3105/3106/3107/3108/3109/3112/3113/3115/3118/3119/3120/3122/3123/3125/3134/3136/3359/3594/3559/3560/3569/3675/3676/3680/3683/3684/3687/3689/3696/3775/56479/3856/653361/4688/4689/9722/9180/5142/5979/6331/22941/7096/7097/50852/7412/7535 | 6<br>8 |
| C<br>C | GO:00<br>43235 | receptor complex                | 49/93<br>9 | 292/1867<br>8 | 8.<br>42<br>E-<br>14 | 6.<br>31<br>E-<br>12 | 4.80E-12 | 84059/150/54518/929/919/948/915/916/917/960/923/972/973/925/1134/1380/1439/83416/2903/2904/3359/3594/3559/3560/3569/3675/3676/3680/3683/3684/3687/3689/3691/3696/3822/3977/23643/4306/4973/9180/5979/22941/7096/7097/10333/51284/50852/7253/7535                                                                                                  | 4<br>9 |
| C<br>C | GO:00<br>42613 | MHC class II protein complex    | 12/93<br>9 | 16/18678      | 3.<br>68<br>E-<br>13 | 2.<br>36<br>E-<br>11 | 1.80E-11 | 972/3108/3109/3112/3113/3115/3118/3119/3120/3122/3123/3125                                                                                                                                                                                                                                                                                        | 1<br>2 |
| C<br>C | GO:00<br>30139 | endocytic vesicle               | 47/93<br>9 | 289/1867<br>8 | 8.<br>84<br>E-<br>13 | 4.<br>97<br>E-<br>11 | 3.78E-11 | 306/348/9332/948/972/57214/11151/1493/8029/1536/1803/2209/752/10578/1839/3105/3106/3107/3113/3115/3118/3119/3120/3122/3123/3125/3134/3136/4057/8685/219972/4481/653361/4688/4689/5880/6556/23166/55576/6812/6890/6891/7096/7097/10333/51284/7454                                                                                                  | 4<br>7 |
| C<br>C | GO:00<br>30666 | endocytic vesicle membrane      | 33/93<br>9 | 161/1867<br>8 | 3.<br>79<br>E-<br>12 | 1.<br>89<br>E-<br>10 | 1.44E-10 | 306/348/9332/948/972/11151/1536/2209/1839/3105/3106/3107/3113/3115/3118/3119/3120/3122/3123/3125/3134/3136/8685/4481/5880/6556/23166/55576/6890/6891/7096/7097/10333                                                                                                                                                                              | 3<br>3 |
| C<br>C | GO:00<br>45121 | membrane raft                   | 47/93<br>9 | 309/1867<br>8 | 1.<br>02<br>E-<br>15 | 4.<br>61<br>E-<br>15 | 3.50E-10 | 5244/107/119/84830/330/695/929/930/914/948/962/973/925/999/1525/1803/355/2817/23426/3055/3162/3383/3684/3689/3738/3932/3937/4038/120892/54742/114569/931/9722/4973                                                                                                                                                                                | 4<br>7 |

|   |       |                                                                      |       |          |      |      |          |                                                                                                                                                                                                                                                                                                       |   |
|---|-------|----------------------------------------------------------------------|-------|----------|------|------|----------|-------------------------------------------------------------------------------------------------------------------------------------------------------------------------------------------------------------------------------------------------------------------------------------------------------|---|
|   |       |                                                                      |       |          | 11   | 10   |          | /5577/5788/5979/6281/6331/6401/6404/6513/7035/7096/7097/10333/7535                                                                                                                                                                                                                                    |   |
| C | GO:00 | membrane                                                             | 47/93 | 310/1867 | 1.   | 4.   | 3.58E-10 | 5244/107/119/84830/330/695/929/930/914/948/962/973/925/999/1525/1803/355/2817/23426/3055/3162/3383/3684/3689/3738/3932/3937/4038/120892/54742/114569/931/9722/4973/5577/5788/5979/6281/6331/6401/6404/6513/7035/7096/7097/10333/7535                                                                  | 4 |
| C | 98857 | microdomain                                                          | 9     | 8        | 15   | 71   |          |                                                                                                                                                                                                                                                                                                       | 7 |
|   |       |                                                                      |       |          | E-11 | E-10 |          |                                                                                                                                                                                                                                                                                                       |   |
| C | GO:00 | integral component of luminal side of endoplasmic reticulum membrane | 14/93 | 29/18678 | 2.   | 7.   | 5.70E-10 | 972/3105/3106/3107/3113/3115/3118/3119/3120/3122/3123/3125/3134/3136                                                                                                                                                                                                                                  | 1 |
| C | 71556 |                                                                      | 9     |          | 29   | 50   |          |                                                                                                                                                                                                                                                                                                       | 4 |
|   |       |                                                                      |       |          | E-11 | E-10 |          |                                                                                                                                                                                                                                                                                                       |   |
| C | GO:00 | luminal side of endoplasmic reticulum membrane                       | 14/93 | 29/18678 | 2.   | 7.   | 5.70E-10 | 972/3105/3106/3107/3113/3115/3118/3119/3120/3122/3123/3125/3134/3136                                                                                                                                                                                                                                  | 1 |
| C | 98553 |                                                                      | 9     |          | 29   | 50   |          |                                                                                                                                                                                                                                                                                                       | 4 |
|   |       |                                                                      |       |          | E-11 | E-10 |          |                                                                                                                                                                                                                                                                                                       |   |
| C | GO:00 | plasma membrane receptor complex                                     | 31/93 | 153/1867 | 2.   | 7.   | 5.70E-10 | 54518/919/915/916/917/923/973/925/1134/1439/2903/2904/3359/3594/3559/3560/3569/3675/3676/3680/3683/3684/3687/3689/3696/9180/22941/7096/7097/50852/7535                                                                                                                                                | 3 |
| C | 98802 |                                                                      | 9     | 8        | 33   | 50   |          |                                                                                                                                                                                                                                                                                                       | 1 |
|   |       |                                                                      |       |          | E-11 | E-10 |          |                                                                                                                                                                                                                                                                                                       |   |
| C | GO:00 | membrane region                                                      | 47/93 | 321/1867 | 3.   | 1.   | 9.06E-10 | 5244/107/119/84830/330/695/929/930/914/948/962/973/925/999/1525/1803/355/2817/23426/3055/3162/3383/3684/3689/3738/3932/3937/4038/120892/54742/114569/931/9722/4973/5577/5788/5979/6281/6331/6401/6404/6513/7035/7096/7097/10333/7535                                                                  | 4 |
| C | 98589 |                                                                      | 9     | 8        | 97   | 19   |          |                                                                                                                                                                                                                                                                                                       | 7 |
|   |       |                                                                      |       |          | E-11 | E-09 |          |                                                                                                                                                                                                                                                                                                       |   |
| C | GO:00 | extracellular matrix                                                 | 57/93 | 468/1867 | 5.   | 1.   | 1.18E-08 | 8728/27299/56999/54507/249/301/309/653145/348/4059/655/712/713/714/147372/50937/1116/1310/340267/1285/1286/131873/1297/1476/1514/84034/2152/2201/2219/10875/2817/3383/3897/284217/3909/3914/4321/4316/4318/22915/4583/89797/9423/5266/5806/5649/6281/6279/5265/5272/710/9806/7980/7052/4982/7399/7422 | 5 |
| C | 31012 |                                                                      | 9     | 8        | 53   | 55   |          |                                                                                                                                                                                                                                                                                                       | 7 |
|   |       |                                                                      |       |          | E-10 | E-08 |          |                                                                                                                                                                                                                                                                                                       |   |
| C | GO:00 | immunological synapse                                                | 14/93 | 36/18678 | 8.   | 2.   | 1.62E-08 | 940/951/916/963/923/11151/3001/3002/84868/3383/3932/5588/388325/7535                                                                                                                                                                                                                                  | 1 |
| C | 01772 |                                                                      | 9     |          | 06   | 13   |          |                                                                                                                                                                                                                                                                                                       | 4 |

|        |                |                                                         |            |               |                      |                      |          |                                                                                                                                                                                                                                  |        |
|--------|----------------|---------------------------------------------------------|------------|---------------|----------------------|----------------------|----------|----------------------------------------------------------------------------------------------------------------------------------------------------------------------------------------------------------------------------------|--------|
|        |                |                                                         |            |               | E-10                 | E-08                 |          |                                                                                                                                                                                                                                  |        |
| C<br>C | GO:00<br>45335 | phagocytic<br>vesicle                                   | 26/93<br>9 | 128/1867<br>8 | 8.<br>96<br>E-<br>10 | 2.<br>24<br>E-<br>08 | 1.70E-08 | 306/948/11151/1536/752/10578/3105/3106/3107/3134/3136/<br>4057/219972/653361/4688/4689/5880/6556/6812/6890/6891<br>/7096/7097/10333/51284/7454                                                                                   | 2<br>6 |
| C<br>C | GO:00<br>42101 | T cell<br>receptor<br>complex                           | 9/939      | 17/18678      | 3.<br>33<br>E-<br>08 | 7.<br>89<br>E-<br>07 | 6.00E-07 | 54518/919/915/916/917/923/925/50852/7535                                                                                                                                                                                         | 9      |
| C<br>C | GO:00<br>70820 | tertiary<br>granule                                     | 27/93<br>9 | 164/1867<br>8 | 4.<br>91<br>E-<br>08 | 1.<br>10<br>E-<br>06 | 8.40E-07 | 84658/963/978/1118/160364/1378/1476/2919/1536/2204/22<br>07/2357/2358/3684/3687/3689/3903/10288/4057/4069/4318/<br>3071/4973/5806/140885/6556/6515                                                                               | 2<br>7 |
| C<br>C | GO:00<br>12507 | ER to Golgi<br>transport<br>vesicle<br>membrane         | 15/93<br>9 | 55/18678      | 5.<br>32<br>E-<br>08 | 1.<br>14<br>E-<br>06 | 8.67E-07 | 374/972/3105/3106/3107/3113/3115/3118/3119/3120/3122/3<br>123/3125/3134/3136                                                                                                                                                     | 1<br>5 |
| C<br>C | GO:00<br>42581 | specific<br>granule                                     | 26/93<br>9 | 160/1867<br>8 | 1.<br>13<br>E-<br>07 | 2.<br>32<br>E-<br>06 | 1.76E-06 | 222487/306/10396/719/948/963/1116/1118/160364/2919/15<br>36/8560/1794/2204/2358/3683/3684/3689/3903/4057/4069/4<br>973/5329/5806/6515/6518                                                                                       | 2<br>6 |
| C<br>C | GO:00<br>30134 | COPII-coate<br>d ER to<br>Golgi<br>transport<br>vesicle | 16/93<br>9 | 69/18678      | 2.<br>27<br>E-<br>07 | 4.<br>45<br>E-<br>06 | 3.38E-06 | 374/972/3105/3106/3107/3113/3115/3118/3119/3120/3122/3<br>123/3125/3134/3136/5265                                                                                                                                                | 1<br>6 |
| C<br>C | GO:00<br>98636 | protein<br>complex<br>involved in<br>cell<br>adhesion   | 11/93<br>9 | 33/18678      | 3.<br>41<br>E-<br>07 | 6.<br>31<br>E-<br>06 | 4.80E-06 | 940/941/1493/3675/3676/3680/3683/3684/3687/3689/3696                                                                                                                                                                             | 1<br>1 |
| C<br>C | GO:00<br>62023 | collagen-co<br>ntaining<br>extracellular<br>matrix      | 45/93<br>9 | 399/1867<br>8 | 3.<br>50<br>E-<br>07 | 6.<br>31<br>E-<br>06 | 4.80E-06 | 8728/27299/56999/54507/301/309/653145/348/4059/655/71<br>2/713/714/50937/1310/340267/1285/1286/131873/1297/147<br>6/1514/84034/2152/2201/2219/10875/2817/3383/3897/2842<br>17/3909/3914/4318/22915/4583/89797/9423/6281/6279/526 | 4<br>5 |

|   |       |                               |       |           |    |    |          |                                                                                                                                                               |   |
|---|-------|-------------------------------|-------|-----------|----|----|----------|---------------------------------------------------------------------------------------------------------------------------------------------------------------|---|
|   |       |                               |       |           |    |    |          | 5/5272/710/7052/7399                                                                                                                                          |   |
| C | GO:00 | clathrin-coat                 | 12/93 | 40/18678  | 3. | 6. | 4.84E-06 | 348/972/2209/1839/3113/3115/3118/3119/3120/3122/3123/3125                                                                                                     | 1 |
| C | 30669 | ed endocytic vesicle membrane | 9     |           | 68 | 36 |          |                                                                                                                                                               | 2 |
|   |       |                               |       |           | E- | E- |          |                                                                                                                                                               |   |
|   |       |                               |       |           | 07 | 06 |          |                                                                                                                                                               |   |
| C | GO:00 | clathrin-coat                 | 20/93 | 110/18678 | 5. | 8. | 6.39E-06 | 348/374/915/917/972/57214/1601/2069/2209/1839/3113/3115/3118/3119/3120/3122/3123/3125/3575/9182                                                               | 2 |
| C | 30665 | ed vesicle membrane           | 9     | 8         | 18 | 40 |          |                                                                                                                                                               | 0 |
|   |       |                               |       |           | E- | E- |          |                                                                                                                                                               |   |
|   |       |                               |       |           | 07 | 06 |          |                                                                                                                                                               |   |
| C | GO:00 | specific granule membrane     | 18/93 | 91/18678  | 5. | 8. | 6.39E-06 | 222487/10396/719/948/963/160364/1536/8560/2204/2358/3683/3684/3689/3903/4973/5329/6515/6518                                                                   | 1 |
| C | 35579 |                               | 9     |           | 23 | 40 |          |                                                                                                                                                               | 8 |
|   |       |                               |       |           | E- | E- |          |                                                                                                                                                               |   |
|   |       |                               |       |           | 07 | 06 |          |                                                                                                                                                               |   |
| C | GO:00 | clathrin-coat                 | 14/93 | 59/18678  | 9. | 1. | 1.13E-05 | 348/972/57214/1493/2209/1839/3113/3115/3118/3119/3120/3122/3123/3125                                                                                          | 1 |
| C | 45334 | ed endocytic vesicle          | 9     |           | 56 | 48 |          |                                                                                                                                                               | 4 |
|   |       |                               |       |           | E- | E- |          |                                                                                                                                                               |   |
|   |       |                               |       |           | 07 | 05 |          |                                                                                                                                                               |   |
| C | GO:00 | coated vesicle membrane       | 25/93 | 169/18678 | 1. | 1. | 1.39E-05 | 348/374/915/917/972/57214/1601/2069/2209/1839/3105/3106/3107/3113/3115/3118/3119/3120/3122/3123/3125/3134/3136/3575/9182                                      | 2 |
| C | 30662 |                               | 9     | 8         | 22 | 83 |          |                                                                                                                                                               | 5 |
|   |       |                               |       |           | E- | E- |          |                                                                                                                                                               |   |
|   |       |                               |       |           | 06 | 05 |          |                                                                                                                                                               |   |
| C | GO:00 | clathrin-coat                 | 26/93 | 182/18678 | 1. | 2. | 1.63E-05 | 5244/348/374/23245/915/917/972/57214/1493/1601/1906/2069/2209/1839/3113/3115/3118/3119/3120/3122/3123/3125/3575/5874/9182/85439                               | 2 |
| C | 30136 | ed vesicle                    | 9     | 8         | 48 | 14 |          |                                                                                                                                                               | 6 |
|   |       |                               |       |           | E- | E- |          |                                                                                                                                                               |   |
|   |       |                               |       |           | 06 | 05 |          |                                                                                                                                                               |   |
| C | GO:00 | tertiary granule membrane     | 15/93 | 73/18678  | 2. | 3. | 2.98E-05 | 963/160364/1536/2204/2207/2358/3684/3687/3689/3903/10288/4973/140885/6556/6515                                                                                | 1 |
| C | 70821 |                               | 9     |           | 78 | 92 |          |                                                                                                                                                               | 5 |
|   |       |                               |       |           | E- | E- |          |                                                                                                                                                               |   |
|   |       |                               |       |           | 06 | 05 |          |                                                                                                                                                               |   |
| C | GO:00 | coated vesicle                | 32/93 | 261/18678 | 2. | 4. | 3.08E-05 | 5244/348/374/23245/915/917/972/57214/1493/1601/1906/2069/2209/1839/3105/3106/3107/3113/3115/3118/3119/3120/3122/3123/3125/3134/3136/3575/5874/9182/5265/85439 | 3 |
| C | 30135 |                               | 9     | 8         | 97 | 05 |          |                                                                                                                                                               | 2 |
|   |       |                               |       |           | E- | E- |          |                                                                                                                                                               |   |
|   |       |                               |       |           | 06 | 05 |          |                                                                                                                                                               |   |
| C | GO:00 | phagocytic vesicle membrane   | 15/93 | 74/18678  | 3. | 4. | 3.33E-05 | 306/11151/1536/3105/3106/3107/3134/3136/5880/6556/6890/6891/7096/7097/10333                                                                                   | 1 |
| C | 30670 |                               | 9     |           | 33 | 39 |          |                                                                                                                                                               | 5 |
|   |       |                               |       |           | E- | E- |          |                                                                                                                                                               |   |

|   |       |                                             |       |          |    |    |             |                                                                                                                         |   |
|---|-------|---------------------------------------------|-------|----------|----|----|-------------|-------------------------------------------------------------------------------------------------------------------------|---|
| C | GO:00 | anchored                                    | 23/93 | 156/1867 | 3. | 4. | 3.33E-05    | 249/420/135228/929/914/962/1043/1368/1800/2215/2350/2674/2811/2817/54742/266727/10232/4907/5329/5874/56963/7035/8875    | 2 |
| C | 31225 | component of membrane                       | 9     | 8        | 41 | 39 |             |                                                                                                                         | 3 |
| C | GO:00 | plasma                                      | 18/93 | 106/1867 | 5. | 6. | 4.98E-05    | 119/84830/925/999/3055/3162/3684/3689/3937/4038/120892/931/9722/6331/6401/6404/6513/7035                                | 1 |
| C | 44853 | membrane raft                               | 9     | 8        | 24 | 55 |             |                                                                                                                         | 8 |
| C | GO:01 | ficolin-1-rich                              | 13/93 | 61/18678 | 8. | 0. | 7.73E-05    | 84658/1378/2204/2207/2357/2358/3687/3689/10288/3071/140885/6556/6515                                                    | 1 |
| C | 01003 | granule membrane                            | 9     |          | 36 | 00 |             |                                                                                                                         | 3 |
| C | GO:00 | integral                                    | 19/93 | 125/1867 | 1. | 0. | 0.000137181 | 972/10170/6785/3105/3106/3107/3113/3115/3118/3119/3120/3122/3123/3125/3134/3136/54463/6890/6891                         | 1 |
| C | 30176 | component of endoplasmic reticulum membrane | 9     | 8        | 52 | 00 |             |                                                                                                                         | 9 |
| C | GO:00 | intrinsic                                   | 19/93 | 131/1867 | 3. | 0. | 0.000262752 | 972/10170/6785/3105/3106/3107/3113/3115/3118/3119/3120/3122/3123/3125/3134/3136/54463/6890/6891                         | 1 |
| C | 31227 | component of endoplasmic reticulum membrane | 9     | 8        | 00 | 00 |             |                                                                                                                         | 9 |
| C | GO:00 | Golgi-associated vesicle                    | 16/93 | 102/1867 | 4. | 0. | 0.000406881 | 374/972/3105/3106/3107/3113/3115/3118/3119/3120/3122/3123/3125/3134/3136/9182                                           | 1 |
| C | 30660 | membrane                                    | 9     | 8        | 76 | 00 |             |                                                                                                                         | 6 |
| C | GO:01 | ficolin-1-rich                              | 23/93 | 185/1867 | 5. | 0. | 0.000476063 | 84658/51411/978/1378/1476/2204/2207/2219/10875/2357/2358/3101/3304/3687/3689/10288/4318/4332/3071/5265/140885/6556/6515 | 2 |
| C | 01002 | granule                                     | 9     | 8        | 71 | 00 |             |                                                                                                                         | 3 |
|   |       |                                             |       |          | E- | 06 |             |                                                                                                                         |   |



|   |       |              |       |          |    |    |             |                                                        |   |
|---|-------|--------------|-------|----------|----|----|-------------|--------------------------------------------------------|---|
|   |       |              |       |          | 05 | 26 |             |                                                        |   |
|   |       |              |       |          |    | 20 |             |                                                        |   |
|   |       |              |       |          |    | 6  |             |                                                        |   |
| C | GO:00 | mast cell    | 7/939 | 22/18678 | 6. | 0. | 0.000566733 | 301/695/8013/5293/5294/10125/5552                      | 7 |
| C | 42629 | granule      |       |          | 96 | 00 |             |                                                        |   |
|   |       |              |       |          | E- | 07 |             |                                                        |   |
|   |       |              |       |          | 05 | 45 |             |                                                        |   |
|   |       |              |       |          |    | 47 |             |                                                        |   |
|   |       |              |       |          |    | 1  |             |                                                        |   |
| C | GO:00 | integrin     | 8/939 | 30/18678 | 8. | 0. | 0.00068525  | 3675/3676/3680/3683/3684/3687/3689/3696                | 8 |
| C | 08305 | complex      |       |          | 61 | 00 |             |                                                        |   |
|   |       |              |       |          | E- | 09 |             |                                                        |   |
|   |       |              |       |          | 05 | 01 |             |                                                        |   |
|   |       |              |       |          |    | 36 |             |                                                        |   |
|   |       |              |       |          |    | 8  |             |                                                        |   |
| C | GO:00 | collagen     | 14/93 | 86/18678 | 9. | 0. | 0.000717569 | 712/713/714/147372/1310/340267/1285/1286/131873/1297/  | 1 |
| C | 05581 | trimer       | 9     |          | 23 | 00 |             | 84034/2219/8685/4481                                   | 4 |
|   |       |              |       |          | E- | 09 |             |                                                        |   |
|   |       |              |       |          | 05 | 43 |             |                                                        |   |
|   |       |              |       |          |    | 87 |             |                                                        |   |
|   |       |              |       |          |    | 9  |             |                                                        |   |
| C | GO:00 | Golgi-associ | 19/93 | 145/1867 | 0. | 0. | 0.000928495 | 374/972/3105/3106/3107/3113/3115/3118/3119/3120/3122/3 | 1 |
| C | 05798 | ated vesicle | 9     | 8        | 00 | 00 |             | 123/3125/3134/3136/120892/5874/9182/5265               | 9 |
|   |       |              |       |          | 01 | 12 |             |                                                        |   |
|   |       |              |       |          | 22 | 21 |             |                                                        |   |
|   |       |              |       |          | 13 | 32 |             |                                                        |   |
|   |       |              |       |          | 3  | 7  |             |                                                        |   |
| C | GO:00 | cell-cell    | 39/93 | 414/1867 | 0. | 0. | 0.000953539 | 5244/575/301/57863/914/916/963/999/11151/1525/1803/182 | 3 |
| C | 05911 | junction     | 9     | 8        | 00 | 00 |             | 4/1829/23136/83481/2707/127534/2709/375519/79977/3702  | 9 |
|   |       |              |       |          | 01 | 12 |             | /120425/3856/284217/3937/10397/5818/4868/5027/64065/1  |   |
|   |       |              |       |          | 28 | 54 |             | 1187/6331/57619/6513/387357/23650/7409/7454/7535       |   |
|   |       |              |       |          | 21 | 27 |             |                                                        |   |
|   |       |              |       |          | 4  |    |             |                                                        |   |
| C | GO:00 | lysosomal    | 34/93 | 344/1867 | 0. | 0. | 0.000979865 | 290/309/10396/719/972/8029/1601/1803/1917/2357/11010/5 | 3 |
| C | 05765 | membrane     | 9     | 8        | 00 | 00 |             | 9345/3108/3109/3112/3113/3115/3118/3119/3120/3122/312  | 4 |
|   |       |              |       |          | 01 | 12 |             | 3/3125/3134/3136/10410/57535/27074/7805/4647/150372/4  |   |
|   |       |              |       |          | 37 | 88 |             | 948/51284/51311                                        |   |

|        |                |                                  |            |               |                                 |                                 |             |                                                                                                                                                                                                        |        |
|--------|----------------|----------------------------------|------------|---------------|---------------------------------|---------------------------------|-------------|--------------------------------------------------------------------------------------------------------------------------------------------------------------------------------------------------------|--------|
|        |                |                                  |            |               | 48<br>3                         | 89<br>9                         |             |                                                                                                                                                                                                        |        |
| C<br>C | GO:00<br>98852 | lytic vacuole<br>membrane        | 34/93<br>9 | 344/1867<br>8 | 0.<br>00<br>01<br>37<br>48<br>3 | 0.<br>00<br>12<br>88<br>89<br>9 | 0.000979865 | 290/309/10396/719/972/8029/1601/1803/1917/2357/11010/59345/3108/3109/3112/3113/3115/3118/3119/3120/3122/3123/3125/3134/3136/10410/57535/27074/7805/4647/150372/4948/51284/51311                        | 3<br>4 |
| C<br>C | GO:00<br>30658 | transport<br>vesicle<br>membrane | 22/93<br>9 | 188/1867<br>8 | 0.<br>00<br>01<br>99<br>89<br>8 | 0.<br>00<br>18<br>35<br>79<br>6 | 0.001395634 | 374/10396/972/3105/3106/3107/3113/3115/3118/3119/3120/3122/3123/3125/3134/3136/120892/79772/5874/9182/6622/91683                                                                                       | 2<br>2 |
| C<br>C | GO:00<br>60205 | cytoplasmic<br>vesicle<br>lumen  | 33/93<br>9 | 338/1867<br>8 | 0.<br>00<br>02<br>15<br>16      | 0.<br>00<br>19<br>36<br>43<br>7 | 0.001472145 | 100/51816/348/23526/64333/51411/718/978/1116/1118/1476/1521/2919/1794/2171/2219/83706/10578/3101/3481/4057/4069/22915/4332/11240/51316/5806/6279/6414/5265/710/5552/7422                               | 3<br>3 |
| C<br>C | GO:00<br>31983 | vesicle<br>lumen                 | 33/93<br>9 | 339/1867<br>8 | 0.<br>00<br>02<br>27<br>19<br>4 | 0.<br>00<br>20<br>04<br>65<br>6 | 0.001524007 | 100/51816/348/23526/64333/51411/718/978/1116/1118/1476/1521/2919/1794/2171/2219/83706/10578/3101/3481/4057/4069/22915/4332/11240/51316/5806/6279/6414/5265/710/5552/7422                               | 3<br>3 |
| C<br>C | GO:00<br>31252 | cell leading<br>edge             | 36/93<br>9 | 384/1867<br>8 | 0.<br>00<br>02<br>52<br>07<br>4 | 0.<br>00<br>21<br>81<br>41<br>1 | 0.001658383 | 30817/84059/199/54518/23526/660/146206/960/999/1021/23242/11151/7852/1803/23136/55612/54857/10788/3691/3936/4210/64005/5341/26499/55607/5800/117177/5880/10235/9750/64092/388325/80725/10381/7399/7456 | 3<br>6 |
| C<br>C | GO:00<br>16324 | apical<br>plasma<br>membrane     | 30/93<br>9 | 300/1867<br>8 | 0.<br>00<br>02<br>72<br>02      | 0.<br>00<br>23<br>09<br>66      | 0.001755888 | 5243/5244/10149/301/948/960/53405/8029/1800/1803/1829/3775/114569/4478/23255/4647/9180/5031/5800/5874/9750/22941/57619/6559/6513/6518/159963/23043/140803/7399                                         | 3<br>0 |

|        |                |                          |            |               |                                 |                                 |             |                                                                                                                                                                                                                                  |        |
|--------|----------------|--------------------------|------------|---------------|---------------------------------|---------------------------------|-------------|----------------------------------------------------------------------------------------------------------------------------------------------------------------------------------------------------------------------------------|--------|
|        |                |                          |            |               | 8                               | 9                               |             |                                                                                                                                                                                                                                  |        |
| C<br>C | GO:00<br>01891 | phagocytic<br>cup        | 7/939      | 27/18678      | 0.<br>00<br>02<br>90<br>60<br>7 | 0.<br>00<br>24<br>21<br>72<br>3 | 0.001841076 | 575/199/301/51411/11151/3936/64005                                                                                                                                                                                               | 7      |
| C<br>C | GO:00<br>10008 | endosome<br>membrane     | 41/93<br>9 | 464/1867<br>8 | 0.<br>00<br>03<br>39<br>54<br>4 | 0.<br>00<br>27<br>78<br>09<br>1 | 0.002111999 | 9744/301/309/653145/8938/929/911/29126/8029/2209/1045<br>7/3105/3106/3107/3108/3109/3112/3113/3115/3118/3119/31<br>20/3122/3123/3125/3134/3136/10410/57535/23643/4360/46<br>89/10397/27065/4948/5874/5979/6556/79689/51284/51311 | 4<br>1 |
| C<br>C | GO:00<br>05774 | vacuolar<br>membrane     | 35/93<br>9 | 382/1867<br>8 | 0.<br>00<br>04<br>67<br>4       | 0.<br>00<br>37<br>55<br>89<br>4 | 0.002855358 | 290/309/10396/719/972/8029/1601/1803/1917/2357/11010/5<br>9345/3108/3109/3112/3113/3115/3118/3119/3120/3122/312<br>3/3125/3134/3136/10410/57535/27074/7805/4647/150372/4<br>948/80183/51284/51311                                | 3<br>5 |
| C<br>C | GO:00<br>32994 | protein-lipid<br>complex | 8/939      | 39/18678      | 0.<br>00<br>06<br>05<br>90<br>5 | 0.<br>00<br>47<br>83<br>45<br>7 | 0.003636546 | 341/348/274/1071/4018/4023/4481/7941                                                                                                                                                                                             | 8      |
| C<br>C | GO:00<br>30133 | transport<br>vesicle     | 32/93<br>9 | 349/1867<br>8 | 0.<br>00<br>07<br>92<br>66      | 0.<br>00<br>61<br>49<br>94<br>8 | 0.004675399 | 321/374/10396/972/1906/2261/2903/3055/3105/3106/3107/3<br>113/3115/3118/3119/3120/3122/3123/3125/3134/3136/9086<br>5/120892/79772/5142/5874/9182/6622/9627/85439/91683/7<br>054                                                  | 3<br>2 |
| C<br>C | GO:00<br>43025 | neuronal<br>cell body    | 39/93<br>9 | 454/1867<br>8 | 0.<br>00<br>08<br>07<br>35<br>3 | 0.<br>00<br>61<br>57<br>78      | 0.004681353 | 100/199/306/348/23245/720/729230/1233/933/22866/23242/<br>1536/1917/2048/3359/3676/3775/3897/4038/120892/653361<br>/10439/5027/10846/10891/55607/5577/5979/22941/6507/65<br>15/9498/6622/9627/80725/7054/64699/7345/7399         | 3<br>9 |

|        |                |                                              |            |               |                                 |                                 |             |                                                                                                                                                                                           |        |
|--------|----------------|----------------------------------------------|------------|---------------|---------------------------------|---------------------------------|-------------|-------------------------------------------------------------------------------------------------------------------------------------------------------------------------------------------|--------|
| C<br>C | GO:00<br>34774 | secretory<br>granule<br>lumen                | 30/93<br>9 | 321/1867<br>8 | 0.<br>00<br>08<br>39<br>40<br>9 | 0.<br>00<br>62<br>14<br>56<br>4 | 0.004724522 | 51816/23526/64333/51411/718/978/1116/1118/1476/1521/2<br>919/1794/2171/2219/83706/3101/3481/4057/4069/22915/43<br>32/11240/51316/5806/6279/6414/5265/710/5552/7422                        | 3<br>0 |
| C<br>C | GO:00<br>45177 | apical part<br>of cell                       | 33/93<br>9 | 365/1867<br>8 | 0.<br>00<br>08<br>42<br>41<br>9 | 0.<br>00<br>62<br>14<br>56<br>4 | 0.004724522 | 5243/5244/10149/301/728/948/960/10752/53405/8029/1800/<br>1803/1829/3775/114569/4478/23255/4647/9180/5031/5800/<br>5874/9750/22941/57619/6559/6513/6518/159963/23043/140<br>803/7399/7412 | 3<br>3 |
| C<br>C | GO:00<br>98562 | cytoplasmic<br>side of<br>membrane           | 16/93<br>9 | 138/1867<br>8 | 0.<br>00<br>15<br>58<br>77<br>9 | 0.<br>01<br>13<br>13<br>72<br>1 | 0.008601075 | 9914/146206/914/999/1917/3055/120892/26191/5778/5788/<br>22821/5996/5997/6769/342667/7054                                                                                                 | 1<br>6 |
| C<br>C | GO:00<br>09898 | cytoplasmic<br>side of<br>plasma<br>membrane | 14/93<br>9 | 114/1867<br>8 | 0.<br>00<br>17<br>33<br>58<br>6 | 0.<br>01<br>23<br>82<br>76<br>1 | 0.009413795 | 9914/146206/914/999/3055/26191/5778/5788/22821/5996/5<br>997/6769/342667/7054                                                                                                             | 1<br>4 |
| C<br>C | GO:00<br>31256 | leading<br>edge<br>membrane                  | 17/93<br>9 | 153/1867<br>8 | 0.<br>00<br>18<br>02<br>25<br>9 | 0.<br>01<br>26<br>72<br>13      | 0.009633783 | 30817/84059/199/23526/660/960/1803/23136/55612/3936/6<br>4005/5341/26499/10235/9750/388325/7399                                                                                           | 1<br>7 |
| C<br>C | GO:00<br>31091 | platelet<br>alpha<br>granule                 | 12/93<br>9 | 91/18678      | 0.<br>00<br>19<br>69<br>88<br>6 | 0.<br>01<br>36<br>37<br>67<br>4 | 0.010367823 | 135228/948/83706/3481/22915/6403/5265/710/6622/5552/6<br>812/7422                                                                                                                         | 1<br>2 |
| C      | GO:00          | plasma                                       | 7/939      | 37/18678      | 0.                              | 0.                              | 0.011099519 | 341/348/1071/4018/4023/4481/7941                                                                                                                                                          | 7      |

|        |                |                              |        |          |                                 |                                 |             |                                                        |        |
|--------|----------------|------------------------------|--------|----------|---------------------------------|---------------------------------|-------------|--------------------------------------------------------|--------|
| C      | 34358          | lipoprotein particle         |        |          | 00<br>21<br>73<br>79<br>8       | 01<br>46<br>00<br>13<br>7       |             |                                                        |        |
| C<br>C | GO:19<br>90777 | lipoprotein particle         | 7/939  | 37/18678 | 0.<br>00<br>21<br>73<br>79<br>8 | 0.<br>01<br>46<br>00<br>13<br>7 | 0.011099519 | 341/348/1071/4018/4023/4481/7941                       | 7      |
| C<br>C | GO:00<br>01931 | uropod                       | 4/939  | 13/18678 | 0.<br>00<br>31<br>50<br>29<br>8 | 0.<br>02<br>05<br>45<br>41<br>9 | 0.015619324 | 4478/8395/388325/6404                                  | 4      |
| C<br>C | GO:00<br>31254 | cell trailing edge           | 4/939  | 13/18678 | 0.<br>00<br>31<br>50<br>29<br>8 | 0.<br>02<br>05<br>45<br>41<br>9 | 0.015619324 | 4478/8395/388325/6404                                  | 4      |
| C<br>C | GO:00<br>32588 | trans-Golgi network membrane | 11/939 | 85/18678 | 0.<br>00<br>34<br>66<br>07<br>3 | 0.<br>02<br>22<br>81<br>89<br>8 | 0.016939454 | 8938/972/3113/3115/3118/3119/3120/3122/3123/3125/27065 | 1<br>1 |
| C<br>C | GO:00<br>05884 | actin filament               | 10/939 | 74/18678 | 0.<br>00<br>38<br>02<br>41<br>4 | 0.<br>02<br>40<br>99<br>80<br>8 | 0.018321491 | 199/301/23242/11151/342184/54857/3055/3936/5880/7454   | 1<br>0 |
| C<br>C | GO:00<br>05767 | secondary lysosome           | 4/939  | 14/18678 | 0.<br>00                        | 0.<br>02                        | 0.020129804 | 120892/653361/4688/4689                                | 4      |

|        |                |                                          |            |           |                                 |                                  |             |                                                                                                       |        |
|--------|----------------|------------------------------------------|------------|-----------|---------------------------------|----------------------------------|-------------|-------------------------------------------------------------------------------------------------------|--------|
|        |                |                                          |            |           | 42<br>36<br>54<br>9             | 64<br>78<br>43<br>4              |             |                                                                                                       |        |
| C<br>C | GO:00<br>55038 | recycling<br>endosome<br>membrane        | 10/93<br>9 | 76/18678  | 0.<br>00<br>46<br>17<br>96<br>8 | 0.<br>02<br>84<br>66<br>92<br>6  | 0.021641522 | 9744/8938/29126/3105/3106/3107/3134/3136/10397/27065                                                  | 1<br>0 |
| C<br>C | GO:00<br>19898 | extrinsic<br>component<br>of<br>membrane | 19/93<br>9 | 199/18678 | 0.<br>00<br>55<br>87<br>45<br>8 | 0.<br>03<br>39<br>77<br>78<br>7  | 0.025831066 | 301/146206/999/22866/8029/2219/2674/3055/94025/653361/5293/5294/23533/5329/5996/9628/6281/6769/342667 | 1<br>9 |
| C<br>C | GO:00<br>98858 | actin-based<br>cell<br>projection        | 19/93<br>9 | 200/18678 | 0.<br>00<br>58<br>92<br>37<br>8 | 0.<br>03<br>49<br>91<br>39<br>2  | 0.026601643 | 84059/768/960/1525/1800/10788/3675/3936/120892/4354/4478/64005/4647/55607/9750/80725/10381/7399/7412  | 1<br>9 |
| C<br>C | GO:19<br>04724 | tertiary<br>granule<br>lumen             | 8/939      | 55/18678  | 0.<br>00<br>59<br>09<br>65<br>7 | 0.<br>03<br>49<br>91<br>39<br>2  | 0.026601643 | 978/1118/1476/2919/4057/4069/4318/5806                                                                | 8      |
| C<br>C | GO:00<br>05901 | caveola                                  | 10/93<br>9 | 79/18678  | 0.<br>00<br>60<br>92<br>27<br>9 | 0.<br>03<br>56<br>04<br>23<br>23 | 0.027067543 | 84830/999/3055/3162/120892/9722/6331/6401/6513/7035                                                   | 1<br>0 |
| C<br>C | GO:00<br>71437 | invadopodium                             | 4/939      | 16/18678  | 0.<br>00<br>71                  | 0.<br>04<br>10                   | 0.031180298 | 1803/3675/4478/5329                                                                                   | 4      |

|        |                |                                          |            |               |                                 |                                 |             |                                                                                                                                                                                                  |        |
|--------|----------------|------------------------------------------|------------|---------------|---------------------------------|---------------------------------|-------------|--------------------------------------------------------------------------------------------------------------------------------------------------------------------------------------------------|--------|
|        |                |                                          |            |               | 09<br>10<br>8                   | 14<br>08<br>4                   |             |                                                                                                                                                                                                  |        |
| C<br>C | GO:00<br>30027 | lamellipodium                            | 18/93<br>9 | 191/1867<br>8 | 0.<br>00<br>78<br>35<br>29<br>1 | 0.<br>04<br>46<br>31<br>40<br>3 | 0.033930306 | 199/54518/146206/960/999/11151/1803/54857/10788/4210/<br>64005/26499/55607/5800/117177/5880/80725/10381                                                                                          | 1<br>8 |
| C<br>C | GO:00<br>16328 | lateral<br>plasma<br>membrane            | 8/939      | 58/18678      | 0.<br>00<br>81<br>55<br>64      | 0.<br>04<br>58<br>75<br>47<br>3 | 0.03487609  | 301/999/1829/23255/27065/5800/6331/375611                                                                                                                                                        | 8      |
| C<br>C | GO:00<br>31092 | platelet<br>alpha<br>granule<br>membrane | 4/939      | 17/18678      | 0.<br>00<br>89<br>32<br>11<br>1 | 0.<br>04<br>90<br>17<br>68<br>2 | 0.037264905 | 135228/948/6403/6622                                                                                                                                                                             | 4      |
| C<br>C | GO:00<br>42599 | lamellar<br>body                         | 4/939      | 17/18678      | 0.<br>00<br>89<br>32<br>11<br>1 | 0.<br>04<br>90<br>17<br>68<br>2 | 0.037264905 | 21/5650/27074/11005                                                                                                                                                                              | 4      |
| M<br>F | GO:00<br>04896 | cytokine<br>receptor<br>activity         | 24/89<br>7 | 78/16969      | 8.<br>65<br>E-<br>13            | 6.<br>22<br>E-<br>10            | 5.12E-10    | 729230/1233/1236/960/972/1439/3577/7852/10663/2322/26<br>74/3594/3595/7850/3556/9173/50615/3559/3560/3561/1333<br>96/3575/3977/9180                                                              | 2<br>4 |
| M<br>F | GO:00<br>42277 | peptide<br>binding                       | 36/89<br>7 | 215/1696<br>9 | 6.<br>91<br>E-<br>10            | 2.<br>15<br>E-<br>07            | 1.77E-07    | 348/712/929/911/30835/948/972/57214/10332/1396/2048/22<br>13/2358/2903/2904/3105/3106/3107/3113/3115/3119/3122/3<br>123/3125/3134/3684/3689/10288/8685/4481/4804/64127/68<br>90/7097/10333/54209 | 3<br>6 |
| M      | GO:00          | glycosamino                              | 34/89      | 199/1696      | 1.                              | 2.                              | 1.77E-07    | 51816/30817/348/655/960/57214/3627/6373/10563/10457/1                                                                                                                                            | 3      |

|        |                |                             |            |           |                      |                      |          |                                                                                                                                                                                                |        |
|--------|----------------|-----------------------------|------------|-----------|----------------------|----------------------|----------|------------------------------------------------------------------------------------------------------------------------------------------------------------------------------------------------|--------|
| F      | 05539          | glycan binding              | 7          | 9         | 19<br>E-<br>09       | 15<br>E-<br>07       |          | 45864/1839/3512/4018/4023/4057/4316/89797/114548/64127/26577/26279/50512/5788/83998/6402/6403/9806/50859/23166/55576/7097/54209/7422                                                           | 4      |
| M<br>F | GO:00<br>42605 | peptide antigen binding     | 13/89<br>7 | 30/16969  | 1.<br>20<br>E-<br>09 | 2.<br>15<br>E-<br>07 | 1.77E-07 | 30835/10332/3105/3106/3107/3113/3115/3119/3122/3123/3125/3134/6890                                                                                                                             | 1<br>3 |
| M<br>F | GO:00<br>19865 | immunoglobulin binding      | 11/89<br>7 | 23/16969  | 6.<br>38<br>E-<br>09 | 9.<br>17<br>E-<br>07 | 7.55E-07 | 933/2204/2208/2209/2212/2213/9103/2214/2215/3512/931                                                                                                                                           | 1<br>1 |
| M<br>F | GO:00<br>01848 | complement binding          | 10/89<br>7 | 20/16969  | 1.<br>85<br>E-<br>08 | 1.<br>72<br>E-<br>06 | 1.41E-06 | 720/721/728/629/1378/1380/3684/3689/5806/11326                                                                                                                                                 | 1<br>0 |
| M<br>F | GO:00<br>23023 | MHC protein complex binding | 11/89<br>7 | 25/16969  | 1.<br>91<br>E-<br>08 | 1.<br>72<br>E-<br>06 | 1.41E-06 | 972/925/3108/3109/3112/3122/3123/3822/10859/10288/931                                                                                                                                          | 1<br>1 |
| M<br>F | GO:00<br>01540 | amyloid-beta binding        | 18/89<br>7 | 71/16969  | 1.<br>91<br>E-<br>08 | 1.<br>72<br>E-<br>06 | 1.41E-06 | 348/712/948/972/2048/2213/2358/2903/2904/3684/3689/10288/8685/4481/4804/7097/10333/54209                                                                                                       | 1<br>8 |
| M<br>F | GO:00<br>05125 | cytokine activity           | 27/89<br>7 | 154/16969 | 3.<br>46<br>E-<br>08 | 2.<br>76<br>E-<br>06 | 2.27E-06 | 374/6357/6363/6366/6348/6351/6352/3627/6373/10563/3576/4283/1906/3603/3553/11009/9235/90865/3569/4050/3084/6398/6696/4982/8600/10673/7422                                                      | 2<br>7 |
| M<br>F | GO:00<br>30246 | carbohydrate binding        | 36/89<br>7 | 252/16969 | 5.<br>18<br>E-<br>08 | 3.<br>72<br>E-<br>06 | 3.06E-06 | 721/30835/933/969/1116/1117/10462/160364/388512/9976/10332/64581/112399/5168/2208/2219/11226/3099/3101/3820/3822/4360/5818/4973/5806/83998/6401/6402/6403/6614/89790/89858/946/6515/6518/56241 | 3<br>6 |
| M<br>F | GO:00<br>33218 | amide binding               | 37/89<br>7 | 266/16969 | 6.<br>85<br>E-<br>08 | 4.<br>22<br>E-<br>06 | 3.47E-06 | 348/712/929/911/30835/948/972/57214/10332/1396/2048/2213/2350/2358/2903/2904/3105/3106/3107/3113/3115/3119/3122/3123/3125/3134/3684/3689/10288/8685/4481/4804/64127/6890/7097/10333/54209      | 3<br>7 |
| M      | GO:00          | cargo                       | 19/89      | 85/16969  | 7.                   | 4.                   | 3.47E-06 | 9332/948/921/923/3426/8029/1601/5168/2350/2358/3684/36                                                                                                                                         | 1      |



|        |                |                                |            |           |                      |                      |             |                                                                                                                          |        |
|--------|----------------|--------------------------------|------------|-----------|----------------------|----------------------|-------------|--------------------------------------------------------------------------------------------------------------------------|--------|
| F      | 38024          | receptor activity              | 7          |           | 04<br>E-<br>08       | 22<br>E-<br>06       |             | 89/8685/4360/4481/23166/55576/56241/64699                                                                                | 9      |
| M<br>F | GO:00<br>42379 | chemokine receptor binding     | 14/89<br>7 | 47/16969  | 8.<br>01<br>E-<br>08 | 4.<br>43<br>E-<br>06 | 3.64E-06    | 6357/6363/6347/6364/6366/6348/6351/6352/729230/3627/6373/10563/3576/4283                                                 | 1<br>4 |
| M<br>F | GO:00<br>32395 | MHC class II receptor activity | 7/897      | 10/16969  | 1.<br>18<br>E-<br>07 | 6.<br>04<br>E-<br>06 | 4.97E-06    | 3112/3113/3118/3119/3120/3122/3125                                                                                       | 7      |
| M<br>F | GO:00<br>01618 | virus receptor activity        | 17/89<br>7 | 74/16969  | 2.<br>24<br>E-<br>07 | 9.<br>55<br>E-<br>06 | 7.86E-06    | 290/30835/941/942/10332/1378/1380/1525/7852/1803/2838/3304/3383/4360/5818/6404/6504                                      | 1<br>7 |
| M<br>F | GO:01<br>04005 | hijacked molecular function    | 17/89<br>7 | 74/16969  | 2.<br>24<br>E-<br>07 | 9.<br>55<br>E-<br>06 | 7.86E-06    | 290/30835/941/942/10332/1378/1380/1525/7852/1803/2838/3304/3383/4360/5818/6404/6504                                      | 1<br>7 |
| M<br>F | GO:00<br>19955 | cytokine binding               | 20/89<br>7 | 100/16969 | 2.<br>26<br>E-<br>07 | 9.<br>55<br>E-<br>06 | 7.86E-06    | 2532/729230/1236/135228/948/972/1436/1441/3577/7852/10663/2633/3587/3594/7850/3560/3561/133396/3676/7538                 | 2<br>0 |
| M<br>F | GO:00<br>15026 | coreceptor activity            | 12/89<br>7 | 40/16969  | 6.<br>25<br>E-<br>07 | 2.<br>50<br>E-<br>05 | 2.06E-05    | 940/941/942/925/7852/10663/115350/2838/3676/23643/5818/4804                                                              | 1<br>2 |
| M<br>F | GO:00<br>03823 | antigen binding                | 24/89<br>7 | 150/16969 | 1.<br>12<br>E-<br>06 | 4.<br>23<br>E-<br>05 | 3.48E-05    | 28/911/30835/962/10332/3105/3106/3107/3113/3115/3119/3122/3123/3125/3134/3575/3676/3512/3822/3902/11006/140885/6504/6890 | 2<br>4 |
| M<br>F | GO:00<br>08009 | chemokine activity             | 10/89<br>7 | 30/16969  | 1.<br>85<br>E-<br>06 | 6.<br>65<br>E-<br>05 | 5.47E-05    | 6357/6363/6366/6348/6352/3627/6373/10563/3576/4283                                                                       | 1<br>0 |
| M      | GO:00          | IgG binding                    | 6/897      | 10/16969  | 3.                   | 0.                   | 0.000100884 | 2209/2212/2213/9103/2214/2215                                                                                            | 6      |

|        |                |                                                             |            |          |                      |                                 |             |                                                                  |        |
|--------|----------------|-------------------------------------------------------------|------------|----------|----------------------|---------------------------------|-------------|------------------------------------------------------------------|--------|
| F      | 19864          |                                                             |            |          | 75<br>E-<br>06       | 00<br>01<br>22<br>61<br>3       |             |                                                                  |        |
| M<br>F | GO:00<br>35325 | Toll-like<br>receptor<br>binding                            | 6/897      | 10/16969 | 3.<br>75<br>E-<br>06 | 0.<br>00<br>01<br>22<br>61<br>3 | 0.000100884 | 948/23643/6279/7096/7097/10333                                   | 6      |
| M<br>F | GO:00<br>48020 | CCR<br>chemokine<br>receptor<br>binding                     | 9/897      | 26/16969 | 4.<br>28<br>E-<br>06 | 0.<br>00<br>01<br>33<br>79<br>5 | 0.000110084 | 6363/6347/6364/6366/6348/6351/6352/729230/10563                  | 9      |
| M<br>F | GO:00<br>23026 | MHC class<br>II protein<br>complex<br>binding               | 7/897      | 16/16969 | 8.<br>46<br>E-<br>06 | 0.<br>00<br>02<br>53<br>56<br>4 | 0.000208627 | 972/3108/3109/3112/3122/3123/931                                 | 7      |
| M<br>F | GO:00<br>05044 | scavenger<br>receptor<br>activity                           | 12/89<br>7 | 51/16969 | 1.<br>04<br>E-<br>05 | 0.<br>00<br>02<br>98<br>46<br>2 | 0.000245568 | 9332/948/921/923/3426/5168/8685/4481/23166/55576/5624<br>1/64699 | 1<br>2 |
| M<br>F | GO:00<br>08329 | signaling<br>pattern<br>recognition<br>receptor<br>activity | 7/897      | 17/16969 | 1.<br>37<br>E-<br>05 | 0.<br>00<br>03<br>78<br>90<br>9 | 0.000311759 | 929/948/64581/2219/23643/8685/7097                               | 7      |
| M<br>F | GO:00<br>19956 | chemokine<br>binding                                        | 8/897      | 23/16969 | 1.<br>42             | 0.<br>00                        | 0.000311759 | 2532/729230/1236/3577/7852/10663/3676/7538                       | 8      |

|        |             |                                       |        |           |          |             |                                                                                                                                      |        |  |
|--------|-------------|---------------------------------------|--------|-----------|----------|-------------|--------------------------------------------------------------------------------------------------------------------------------------|--------|--|
|        |             |                                       |        |           | E-05     | 0378909     |                                                                                                                                      |        |  |
| M<br>F | GO:0001530  | lipopolysaccharide binding            | 9/897  | 30/16969  | 1.62E-05 | 0.000341957 | 575/929/923/4057/23643/5027/6403/7097/54209                                                                                          | 9      |  |
| M<br>F | GO:0038187  | pattern recognition receptor activity | 7/897  | 18/16969  | 2.14E-05 | 0.000437507 | 929/948/64581/2219/23643/8685/7097                                                                                                   | 7      |  |
| M<br>F | GO:0030414  | peptidase inhibitor activity          | 22/897 | 157/16969 | 2.72E-05 | 0.000536349 | 718/720/721/135228/939/340267/1285/1476/1800/4018/4057/89932/51050/5266/5265/5272/710/6622/11005/9806/50859/7035                     | 2<br>2 |  |
| M<br>F | GO:0001664  | G protein-coupled receptor binding    | 26/897 | 205/16969 | 3.15E-05 | 0.000600203 | 51816/150/8862/718/6357/6363/6347/6364/6366/6348/6351/6352/729230/3627/6373/10563/3576/4283/1906/2219/2357/51704/3304/3691/8685/7345 | 2<br>6 |  |
| M<br>F | GO:0004866  | endopeptidase inhibitor activity      | 21/897 | 149/16969 | 3.77E-05 | 0.00067777  | 718/720/721/135228/939/340267/1285/1476/1800/4018/4057/89932/5266/5265/5272/710/6622/11005/9806/50859/7035                           | 2<br>1 |  |
| M<br>F | GO:00098632 | cell-cell adhesion mediator           | 9/897  | 33/16969  | 3.78E-08 | 0.00067777  | 301/1525/1824/1829/4897/11187/5365/140885/23650                                                                                      | 9      |  |

|        |                | activity                                 |            |               | 05                   | 23                              |             |                                                                                                                              |        |
|--------|----------------|------------------------------------------|------------|---------------|----------------------|---------------------------------|-------------|------------------------------------------------------------------------------------------------------------------------------|--------|
| M<br>F | GO:00<br>98631 | cell<br>adhesion<br>mediator<br>activity | 10/89<br>7 | 42/16969      | 5.<br>08<br>E-<br>05 | 0.<br>00<br>10<br>73<br>64<br>2 | 0.000883372 | 301/4059/1525/1824/1829/4897/11187/5365/140885/23650                                                                         | 1<br>0 |
| M<br>F | GO:00<br>31406 | carboxylic<br>acid binding               | 23/89<br>7 | 176/1696<br>9 | 5.<br>54<br>E-<br>05 | 0.<br>00<br>11<br>37<br>95<br>6 | 0.000936288 | 241/341/933/960/57214/56603/112399/2171/2172/2219/2350/2729/2904/145864/5730/6279/6401/6403/6507/23166/55576/6999/7054       | 2<br>3 |
| M<br>F | GO:00<br>61135 | endopeptida<br>se regulator<br>activity  | 21/89<br>7 | 154/1696<br>9 | 6.<br>17<br>E-<br>05 | 0.<br>00<br>12<br>33<br>07<br>7 | 0.001014551 | 718/720/721/135228/939/340267/1285/1476/1800/4018/4057/89932/5266/5265/5272/710/6622/11005/9806/50859/7035                   | 2<br>1 |
| M<br>F | GO:00<br>43177 | organic acid<br>binding                  | 23/89<br>7 | 178/1696<br>9 | 6.<br>61<br>E-<br>05 | 0.<br>00<br>12<br>85<br>30<br>2 | 0.001057521 | 241/341/933/960/57214/56603/112399/2171/2172/2219/2350/2729/2904/145864/5730/6279/6401/6403/6507/23166/55576/6999/7054       | 2<br>3 |
| M<br>F | GO:00<br>01846 | opsonin<br>binding                       | 6/897      | 15/16969      | 7.<br>11<br>E-<br>05 | 0.<br>00<br>13<br>45<br>59<br>2 | 0.001107126 | 720/1378/3684/3689/5806/11326                                                                                                | 6      |
| M<br>F | GO:00<br>61134 | peptidase<br>regulator<br>activity       | 24/89<br>7 | 192/1696<br>9 | 7.<br>90<br>E-<br>05 | 0.<br>00<br>14<br>56            | 0.001198172 | 718/720/721/135228/939/340267/1285/1476/1800/4018/4057/22861/89932/26577/51050/5266/5265/5272/710/6622/11005/9806/50859/7035 | 2<br>4 |

|        |                |                                                                                                                                    |            |               |                                 |                                 |             |                                                                                                                                                                                                                  |        |
|--------|----------------|------------------------------------------------------------------------------------------------------------------------------------|------------|---------------|---------------------------------|---------------------------------|-------------|------------------------------------------------------------------------------------------------------------------------------------------------------------------------------------------------------------------|--------|
|        |                |                                                                                                                                    |            |               |                                 | 24<br>8                         |             |                                                                                                                                                                                                                  |        |
| M<br>F | GO:00<br>45236 | CXCR<br>chemokine<br>receptor<br>binding                                                                                           | 5/897      | 10/16969      | 8.<br>23<br>E-<br>05            | 0.<br>00<br>14<br>79<br>48<br>9 | 0.001217294 | 3627/6373/10563/3576/4283                                                                                                                                                                                        | 5      |
| M<br>F | GO:00<br>08201 | heparin<br>binding                                                                                                                 | 20/89<br>7 | 148/1696<br>9 | 0.<br>00<br>01<br>04<br>07<br>5 | 0.<br>00<br>18<br>25<br>12<br>7 | 0.001501678 | 51816/348/655/3627/6373/10563/10457/1839/4018/4023/40<br>57/4316/89797/26577/26279/5788/83998/6402/6403/7422                                                                                                     | 2<br>0 |
| M<br>F | GO:00<br>04497 | monooxyge<br>nase activity                                                                                                         | 14/89<br>7 | 86/16969      | 0.<br>00<br>01<br>55<br>80<br>8 | 0.<br>00<br>26<br>67<br>29      | 0.002194593 | 9023/1589/56603/1593/1562/1557/1573/29785/1577/2327/2<br>328/8564/6916/7054                                                                                                                                      | 1<br>4 |
| M<br>F | GO:00<br>48018 | receptor<br>ligand<br>activity                                                                                                     | 38/89<br>7 | 397/1696<br>9 | 0.<br>00<br>03<br>00<br>88      | 0.<br>00<br>50<br>30<br>99<br>9 | 0.004139406 | 51816/8862/374/655/6357/6363/6366/6348/6351/6352/2919/<br>3627/6373/10563/3576/4283/1906/10457/1839/3481/3603/3<br>553/11009/9235/90865/3569/4050/3084/145957/6398/10371<br>/6696/7031/4982/8600/10673/1890/7422 | 3<br>8 |
| M<br>F | GO:00<br>16705 | oxidoreduct<br>ase activity,<br>acting on<br>paired<br>donors, with<br>incorporatio<br>n or<br>reduction of<br>molecular<br>oxygen | 18/89<br>7 | 137/1696<br>9 | 0.<br>00<br>03<br>22<br>90<br>2 | 0.<br>00<br>52<br>76<br>51<br>6 | 0.004341413 | 9023/1589/56603/1593/1562/1573/29785/1577/8560/112399<br>/2327/2328/3162/8564/5742/79966/6916/7054                                                                                                               | 1<br>8 |
| M      | GO:00          | protein                                                                                                                            | 5/897      | 13/16969      | 0.                              | 0.                              | 0.004836206 | 1525/1824/1829/4897/140885                                                                                                                                                                                       | 5      |

|        |                |                                                    |            |               |                                 |                                 |             |                                                                                                                                 |        |
|--------|----------------|----------------------------------------------------|------------|---------------|---------------------------------|---------------------------------|-------------|---------------------------------------------------------------------------------------------------------------------------------|--------|
| F      | 86080          | binding involved in heterotypic cell-cell adhesion |            |               | 00<br>03<br>67<br>87<br>9       | 00<br>58<br>77<br>88<br>3       |             |                                                                                                                                 |        |
| M<br>F | GO:00<br>42834 | peptidoglycan binding                              | 5/897      | 14/16969      | 0.<br>00<br>05<br>47<br>44<br>2 | 0.<br>00<br>85<br>56<br>75<br>1 | 0.007040325 | 3512/114548/64127/7097/54209                                                                                                    | 5      |
| M<br>F | GO:00<br>19838 | growth factor binding                              | 16/89<br>7 | 121/1696<br>9 | 0.<br>00<br>06<br>33<br>08<br>7 | 0.<br>00<br>96<br>84<br>88<br>6 | 0.007968532 | 135228/948/10563/1843/2261/23105/2817/3587/7850/3560/<br>3561/3691/3977/4804/9180/6331                                          | 1<br>6 |
| M<br>F | GO:00<br>42287 | MHC protein binding                                | 8/897      | 38/16969      | 0.<br>00<br>07<br>00<br>70<br>1 | 0.<br>01<br>04<br>95<br>92<br>3 | 0.008635837 | 972/925/64581/3902/10859/10288/6890/6891                                                                                        | 8      |
| M<br>F | GO:00<br>05126 | cytokine receptor binding                          | 23/89<br>7 | 210/1696<br>9 | 0.<br>00<br>07<br>57<br>13<br>7 | 0.<br>01<br>10<br>75<br>48<br>2 | 0.009112687 | 6357/6363/6347/6364/6366/6348/6351/6352/729230/3627/6<br>373/10563/3576/4283/3594/3553/3569/3977/4050/26228/86<br>00/10673/7422 | 2<br>3 |
| M<br>F | GO:00<br>04222 | metalloendopeptidase activity                      | 13/89<br>7 | 89/16969      | 0.<br>00<br>07<br>77<br>70<br>8 | 0.<br>01<br>10<br>75<br>48<br>2 | 0.009112687 | 8728/8745/10863/27299/56999/9427/3792/4321/4316/4318/<br>5069/5251/129293                                                       | 1<br>3 |
| M<br>F | GO:00<br>30169 | low-density lipoprotein                            | 5/897      | 15/16969      | 0.<br>00                        | 0.<br>01                        | 0.009112687 | 948/4481/23166/55576/54209                                                                                                      | 5      |

|        |                |                                                     |            |           |                                 |                                 |             |                                                                                                                                                                                                      |        |
|--------|----------------|-----------------------------------------------------|------------|-----------|---------------------------------|---------------------------------|-------------|------------------------------------------------------------------------------------------------------------------------------------------------------------------------------------------------------|--------|
|        |                | particle binding                                    |            |           | 07<br>85<br>60<br>4             | 10<br>75<br>48<br>2             |             |                                                                                                                                                                                                      |        |
| M<br>F | GO:19<br>90782 | protein tyrosine kinase binding                     | 12/89<br>7 | 80/16969  | 0.<br>00<br>09<br>63<br>40<br>6 | 0.<br>01<br>33<br>20<br>93<br>5 | 0.010960201 | 389658/55024/914/919/115352/3687/4038/3084/140885/26228/50852/54209                                                                                                                                  | 1<br>2 |
| M<br>F | GO:00<br>30545 | receptor regulator activity                         | 38/89<br>7 | 425/16969 | 0.<br>00<br>11<br>02<br>38<br>4 | 0.<br>01<br>49<br>54<br>97<br>8 | 0.01230466  | 51816/8862/374/655/6357/6363/6366/6348/6351/6352/2919/3627/6373/10563/3576/4283/1906/10457/1839/3481/3603/3553/11009/9235/90865/3569/4050/3084/145957/6398/10371/6696/7031/4982/8600/10673/1890/7422 | 3<br>8 |
| M<br>F | GO:00<br>48029 | monosaccharide binding                              | 10/89<br>7 | 62/16969  | 0.<br>00<br>14<br>25<br>52<br>6 | 0.<br>01<br>89<br>80<br>62<br>1 | 0.015616879 | 30835/388512/10332/112399/3099/3101/4360/6403/6515/6518                                                                                                                                              | 1<br>0 |
| M<br>F | GO:00<br>01637 | G protein-coupled chemoattractant receptor activity | 6/897      | 25/16969  | 0.<br>00<br>15<br>97<br>53<br>9 | 0.<br>02<br>05<br>11<br>26      | 0.016876258 | 729230/1233/1236/3577/7852/10663                                                                                                                                                                     | 6      |
| M<br>F | GO:00<br>04950 | chemokine receptor activity                         | 6/897      | 25/16969  | 0.<br>00<br>15<br>97<br>53<br>9 | 0.<br>02<br>05<br>11<br>26      | 0.016876258 | 729230/1233/1236/3577/7852/10663                                                                                                                                                                     | 6      |
| M<br>F | GO:00<br>04713 | protein tyrosine kinase                             | 15/89<br>7 | 120/16969 | 0.<br>00<br>16                  | 0.<br>02<br>07                  | 0.017099107 | 640/660/695/1436/2048/2261/2322/3055/3702/3718/3932/5979/6098/7273/7535                                                                                                                              | 1<br>5 |

|        |                |                                     |            |               |                                 |                                 |             |                                                                                                                                                                   |        |
|--------|----------------|-------------------------------------|------------|---------------|---------------------------------|---------------------------------|-------------|-------------------------------------------------------------------------------------------------------------------------------------------------------------------|--------|
|        |                | activity                            |            |               | 47<br>53<br>9                   | 82<br>10<br>9                   |             |                                                                                                                                                                   |        |
| M<br>F | GO:00<br>71813 | lipoprotein<br>particle<br>binding  | 7/897      | 34/16969      | 0.<br>00<br>17<br>28<br>14<br>5 | 0.<br>02<br>10<br>59<br>93<br>1 | 0.017327694 | 348/948/4023/4481/23166/55576/54209                                                                                                                               | 7      |
| M<br>F | GO:00<br>71814 | protein-lipid<br>complex<br>binding | 7/897      | 34/16969      | 0.<br>00<br>17<br>28<br>14<br>5 | 0.<br>02<br>10<br>59<br>93<br>1 | 0.017327694 | 348/948/4023/4481/23166/55576/54209                                                                                                                               | 7      |
| M<br>F | GO:00<br>04175 | endopeptida<br>se activity          | 30/89<br>7 | 322/1696<br>9 | 0.<br>00<br>18<br>97<br>87<br>4 | 0.<br>02<br>27<br>42<br>86      | 0.018712374 | 8728/8745/10863/27299/56999/717/629/3426/1514/1803/94<br>27/2152/3001/3002/3003/3792/5653/5650/4018/4057/4321/4<br>316/4318/5069/5251/5696/5698/64699/129293/7345 | 3<br>0 |
| M<br>F | GO:00<br>43394 | proteoglyca<br>n binding            | 7/897      | 36/16969      | 0.<br>00<br>24<br>46<br>22      | 0.<br>02<br>88<br>33<br>31<br>9 | 0.023723483 | 51816/348/1514/10457/4023/26279/5788                                                                                                                              | 7      |
| M<br>F | GO:00<br>05178 | integrin<br>binding                 | 14/89<br>7 | 113/1696<br>9 | 0.<br>00<br>25<br>23<br>06<br>4 | 0.<br>02<br>91<br>01<br>59<br>5 | 0.023944216 | 8745/1285/1525/2208/83706/3383/3481/3553/3675/120425/<br>3936/3084/6696/7412                                                                                      | 1<br>4 |
| M<br>F | GO:00<br>08395 | steroid<br>hydroxylase<br>activity  | 5/897      | 19/16969      | 0.<br>00<br>25<br>49            | 0.<br>02<br>91<br>01            | 0.023944216 | 9023/1589/1593/1557/1577                                                                                                                                          | 5      |



|        |                |                                        |            |               |                                 |                                 |             |                                                                                                                                               |        |
|--------|----------------|----------------------------------------|------------|---------------|---------------------------------|---------------------------------|-------------|-----------------------------------------------------------------------------------------------------------------------------------------------|--------|
|        |                |                                        |            |               | 93<br>1                         | 59<br>5                         |             |                                                                                                                                               |        |
| M<br>F | GO:00<br>33691 | sialic acid<br>binding                 | 4/897      | 12/16969      | 0.<br>00<br>27<br>28<br>29<br>2 | 0.<br>03<br>06<br>50<br>65<br>7 | 0.025218753 | 933/2219/6401/6403                                                                                                                            | 4      |
| M<br>F | GO:00<br>01784 | phosphotyro<br>sine residue<br>binding | 7/897      | 37/16969      | 0.<br>00<br>28<br>81<br>74<br>2 | 0.<br>03<br>18<br>76<br>50<br>1 | 0.026227353 | 3055/3932/64092/9021/26228/7409/7535                                                                                                          | 7      |
| M<br>F | GO:00<br>08237 | metallopepti<br>dase activity          | 17/89<br>7 | 153/1696<br>9 | 0.<br>00<br>30<br>21<br>84      | 0.<br>03<br>29<br>19<br>74<br>2 | 0.027085711 | 8728/8745/10863/27299/56999/290/51200/1800/9427/64167<br>/3792/4321/4316/4318/5069/5251/129293                                                | 1<br>7 |
| M<br>F | GO:00<br>05540 | hyaluronic<br>acid binding             | 5/897      | 20/16969      | 0.<br>00<br>32<br>53<br>72<br>7 | 0.<br>03<br>47<br>45<br>75<br>3 | 0.028588117 | 960/57214/145864/23166/55576                                                                                                                  | 5      |
| M<br>F | GO:19<br>01681 | sulfur<br>compound<br>binding          | 22/89<br>7 | 221/1696<br>9 | 0.<br>00<br>32<br>86<br>10<br>7 | 0.<br>03<br>47<br>45<br>75<br>3 | 0.028588117 | 51816/30817/348/655/51363/3627/6373/10563/10457/1839/<br>4018/4023/4057/4316/89797/26577/26279/5788/83998/6402<br>/6403/7422                  | 2<br>2 |
| M<br>F | GO:00<br>03924 | GTPase<br>activity                     | 22/89<br>7 | 224/1696<br>9 | 0.<br>00<br>38<br>67<br>71      | 0.<br>04<br>03<br>02<br>66      | 0.033160233 | 122622/2633/115361/115362/168537/120892/389643/5874/<br>51655/158158/387496/5996/26575/5997/9628/54509/6236/5<br>8528/7280/347733/10381/84617 | 2<br>2 |

|        |                |                                                          |            |               |                                 |                                 |             |                                                                                      |        |
|--------|----------------|----------------------------------------------------------|------------|---------------|---------------------------------|---------------------------------|-------------|--------------------------------------------------------------------------------------|--------|
|        |                |                                                          |            |               |                                 | 4                               |             |                                                                                      |        |
| M<br>F | GO:00<br>05506 | iron ion<br>binding                                      | 16/89<br>7 | 144/1696<br>9 | 0.<br>00<br>39<br>46<br>52<br>8 | 0.<br>04<br>05<br>36<br>48<br>3 | 0.033352615 | 54/316/9023/1589/56603/1593/1562/1557/1573/29785/1577/<br>112399/4057/6622/6916/7054 | 1<br>6 |
| M<br>F | GO:00<br>51861 | glycolipid<br>binding                                    | 5/897      | 21/16969      | 0.<br>00<br>40<br>87<br>17<br>2 | 0.<br>04<br>13<br>89<br>80<br>9 | 0.034054715 | 911/1800/284217/6402/6403                                                            | 5      |
| M<br>F | GO:00<br>04252 | serine-type<br>endopeptida<br>se activity                | 15/89<br>7 | 133/1696<br>9 | 0.<br>00<br>44<br>89<br>15      | 0.<br>04<br>45<br>43<br>53<br>3 | 0.036649536 | 717/629/3426/1803/2152/3001/3002/3003/5653/5650/4018/4<br>057/4316/4318/64699        | 1<br>5 |
| M<br>F | GO:00<br>05518 | collagen<br>binding                                      | 9/897      | 61/16969      | 0.<br>00<br>45<br>22<br>50<br>1 | 0.<br>04<br>45<br>43<br>53<br>3 | 0.036649536 | 147372/960/1514/3675/3680/4321/4318/26577/7399                                       | 9      |
| M<br>F | GO:00<br>02020 | protease<br>binding                                      | 14/89<br>7 | 121/1696<br>9 | 0.<br>00<br>47<br>26<br>40<br>1 | 0.<br>04<br>59<br>22<br>73<br>2 | 0.037784314 | 54507/274/147372/940/10752/1476/1803/2152/3675/6402/5<br>265/5272/7128/7273          | 1<br>4 |
| M<br>F | GO:00<br>30159 | receptor<br>signaling<br>complex<br>scaffold<br>activity | 5/897      | 22/16969      | 0.<br>00<br>50<br>62<br>53<br>4 | 0.<br>04<br>75<br>00<br>33      | 0.03908233  | 916/917/23426/120892/22941                                                           | 5      |

|        |                |                           |            |               |                                 |                            |            |                                                                                   |        |
|--------|----------------|---------------------------|------------|---------------|---------------------------------|----------------------------|------------|-----------------------------------------------------------------------------------|--------|
| M<br>F | GO:00<br>43274 | phospholipa<br>se binding | 4/897      | 14/16969      | 0.<br>00<br>50<br>69<br>33<br>4 | 0.<br>04<br>75<br>00<br>33 | 0.03908233 | 6401/6622/6812/7454                                                               | 4      |
| M<br>F | GO:00<br>17124 | SH3 domain<br>binding     | 14/89<br>7 | 122/1696<br>9 | 0.<br>00<br>50<br>86<br>96<br>2 | 0.<br>04<br>75<br>00<br>33 | 0.03908233 | 8728/916/9829/9844/342184/3059/10656/653361/5063/2619<br>1/22941/140885/7454/7456 | 1<br>4 |

**eTable 12.** Gene Ontology Pathway Enrichment Analysis of Immune-Desert Class in IMvigor210 Trial

| Ontology | ID         | Description                          | Gene ratio | Bg ratio  | P value | P adj  | Q value | Gene ID                                                                                                                                                                                                                                                                                                                                                                                                          | Count |
|----------|------------|--------------------------------------|------------|-----------|---------|--------|---------|------------------------------------------------------------------------------------------------------------------------------------------------------------------------------------------------------------------------------------------------------------------------------------------------------------------------------------------------------------------------------------------------------------------|-------|
| BP       | GO:0030198 | extracellular matrix organization    | 75/408     | 33/4173   | 3.9E-5  | 1.4E-4 | 1.0E-9  | 8038/140766/9509/9507/165/84168/633/151887/1300/1301/1303/1307/1277/1278/1281/1289/1290/50509/1291/1292/1293/1295/1296/1311/90993/83716/1513/1545/1634/4921/11117/2191/2199/2200/23768/2331/2335/2303/2621/26585/3037/5654/22801/3678/3690/4015/4016/4017/4060/4148/4237/8076/4320/4327/4313/4314/22795/255743/5156/10630/90102/7837/5054/6423/6678/23213/55959/7042/7057/7076/7077/7092/3371/1462/7490          | 75    |
| BP       | GO:0043062 | extracellular structure organization | 77/408     | 38/4173   | 2.1E-5  | 4.0E-4 | 2.9E-7  | 8038/140766/9509/9507/165/185/84168/633/151887/1300/1301/1303/1307/1277/1278/1281/1289/1290/50509/1291/1292/1293/1295/1296/1311/90993/83716/1513/1545/1634/4921/11117/2191/2199/2200/23768/2331/2335/2303/2621/26585/3037/5654/22801/3678/3690/4015/4016/4017/4060/4148/4237/8076/4320/4327/4313/4314/22795/255743/5156/10630/90102/5360/7837/5054/6423/6678/23213/55959/7042/7057/7076/7077/7092/3371/1462/7490 | 77    |
| BP       | GO:0030199 | collagen fibril organization         | 24/408     | 45/417913 | 4.7E-2  | 5.9E-2 | 4.3E-5  | 140766/9509/165/1301/1303/1277/1278/1281/1289/1290/50509/1311/1545/4921/11117/2331/2303/26585/4015/4017/4060/4320/6423/7042                                                                                                                                                                                                                                                                                      | 24    |
| BP       | GO:0050151 | skeletal system development          | 58/408     | 47/417913 | 7.1E-2  | 6.7E-2 | 4.9E-3  | 81792/9507/56172/8313/658/1009/1300/1301/1277/1278/1281/1311/1513/1893/2202/2121/2138/56975/2200/2260/2303/2702/2736/2737/26585/9464/3037/4015/4017/10234/4060/4148/4313/4883/9060/5125/56034/5156/91461/5549/5396/5745/5744/4920/623/6424/6591/6678/6781/23213/55959/7042/7043/7045/7076/7092/7291/64131                                                                                                        | 58    |
| BP       | GO:0050153 | ossification                         | 49/408     | 38/417913 | 9.6E-2  | 7.2E-2 | 5.3E-1  | 56172/54829/8313/658/1009/1301/1277/1278/1290/1291/1311/90993/115908/1513/4921/1893/5167/56975/2303/2736/2737/26585/9464/3082/3488/22801/4015/4313/4330/9902/255743/4958/91461/5587/5743/5745/5744/4920/6423/6591/6678/6781/7042/7043/3371/63923/7291/1462/64131                                                                                                                                                 | 49    |
| B        | G          | cell-substrate adhesion              | 40         | 32        | 1.8     | 1.1    | 8.4     | 88/81792/84168/558/151887/1012/1307/1277/1281/50509/1295/1842/10085/11117/20                                                                                                                                                                                                                                                                                                                                     | 40    |

|        |         |                                  |                |                           |                      |                      |                      |                                                                                                                                                                                  |        |
|--------|---------|----------------------------------|----------------|---------------------------|----------------------|----------------------|----------------------|----------------------------------------------------------------------------------------------------------------------------------------------------------------------------------|--------|
| P      | O:      |                                  | /4<br>08       | 2/<br>17<br>91<br>3       | 4E<br>-1<br>8        | 6E<br>-1<br>5        | 6E<br>-1<br>6        | 42/10979/2316/2335/2621/26585/3037/22801/3678/3690/3956/91663/22795/255743/10630/90102/5328/10631/8499/5054/8910/25992/6695/7057/7070/63923                                      | 0      |
| B<br>P | G<br>O: | connective tissue<br>development | 35<br>/4<br>08 | 24<br>3/<br>17<br>91<br>3 | 2.4<br>0E<br>-1<br>8 | 1.3<br>0E<br>-1<br>5 | 9.4<br>7E<br>-1<br>6 | 59/81792/8313/658/1301/1277/1289/1311/1513/1893/2202/2121/2260/2303/2736/2737/26585/9464/4015/4017/4060/5159/91461/5396/5745/5744/4920/6423/6591/6781/23213/55959/7045/7076/7490 | 3<br>5 |
| B<br>P | G<br>O: | cartilage development            | 29<br>/4<br>08 | 18<br>2/<br>17<br>91<br>3 | 1.3<br>4E<br>-1<br>6 | 6.3<br>3E<br>-1<br>4 | 4.6<br>3E<br>-1<br>4 | 81792/8313/658/1301/1277/1311/1513/1893/2202/2121/2260/2736/2737/26585/9464/4017/4060/91461/5396/5745/5744/4920/6423/6591/6781/23213/55959/7045/7076                             | 2<br>9 |
| B<br>P | G<br>O: | chondrocyte<br>differentiation   | 20<br>/4<br>08 | 97<br>/1<br>79<br>13      | 4.8<br>5E<br>-1<br>4 | 2.0<br>4E<br>-1<br>1 | 1.4<br>9E<br>-1<br>1 | 81792/8313/658/1301/1311/1893/2202/2260/2736/2737/26585/4017/91461/5745/5744/6423/6591/23213/55959/7045                                                                          | 2<br>0 |
| B<br>P | G<br>O: | bone mineralization              | 20<br>/4<br>08 | 10<br>8/<br>17<br>91<br>3 | 4.1<br>6E<br>-1<br>3 | 1.5<br>7E<br>-1<br>0 | 1.1<br>5E<br>-1<br>0 | 56172/54829/8313/658/1278/1311/4921/1893/5167/56975/26585/4015/4958/91461/5743/5745/5744/4920/7043/7291                                                                          | 2<br>0 |
| B<br>P | G<br>O: | biomineral tissue<br>development | 23<br>/4<br>08 | 15<br>4/<br>17<br>91<br>3 | 8.2<br>6E<br>-1<br>3 | 2.8<br>3E<br>-1<br>0 | 2.0<br>7E<br>-1<br>0 | 56172/54829/8313/658/1277/1278/1311/4921/1893/5167/56975/2621/26585/9622/4015/4958/91461/5743/5745/5744/4920/7043/7291                                                           | 2<br>3 |
| B<br>P | G<br>O: | cell-matrix adhesion             | 26<br>/4<br>08 | 21<br>4/<br>17<br>91      | 3.5<br>2E<br>-1<br>2 | 1.1<br>1E<br>-0<br>9 | 8.1<br>0E<br>-1<br>0 | 88/81792/1012/1307/1281/50509/1842/11117/2042/10979/2335/26585/22801/3690/22795/255743/90102/5328/10631/8499/5054/8910/25992/7057/7070/63923                                     | 2<br>6 |

|        |                                |                                           |                |                           |                      |                      |                      |                                                                                                                                                                  |        |  |
|--------|--------------------------------|-------------------------------------------|----------------|---------------------------|----------------------|----------------------|----------------------|------------------------------------------------------------------------------------------------------------------------------------------------------------------|--------|--|
|        | 16<br>0                        |                                           |                | 3                         |                      |                      |                      |                                                                                                                                                                  |        |  |
| B<br>P | G<br>O:<br>00<br>01<br>64<br>9 | osteoblast<br>differentiation             | 26<br>/4<br>08 | 22<br>2/<br>17<br>91<br>3 | 8.2<br>1E<br>-1<br>2 | 2.3<br>9E<br>-0<br>9 | 1.7<br>4E<br>-0<br>9 | 8313/658/1277/1291/90993/115908/4921/56975/2736/2737/26585/9464/3082/3488/22801/4015/9902/255743/5587/5745/6423/6591/3371/63923/7291/1462                        | 2<br>6 |  |
| B<br>P | G<br>O:<br>00<br>32<br>96<br>3 | collagen metabolic<br>process             | 18<br>/4<br>08 | 10<br>2/<br>17<br>91<br>3 | 1.4<br>7E<br>-1<br>1 | 3.9<br>8E<br>-0<br>9 | 2.9<br>1E<br>-0<br>9 | 140766/9509/1306/1277/1278/1289/90993/1513/11117/2191/4320/4313/4314/9902/10536/5159/7043/7431                                                                   | 1<br>8 |  |
| B<br>P | G<br>O:<br>00<br>01<br>65<br>5 | urogenital system<br>development          | 31<br>/4<br>08 | 32<br>4/<br>17<br>91<br>3 | 1.6<br>4E<br>-1<br>1 | 4.1<br>4E<br>-0<br>9 | 3.0<br>2E<br>-0<br>9 | 59/170690/9370/185/9244/1588/9420/1634/2138/2200/2260/2303/2736/2737/84662/26585/3037/3764/55083/3976/255743/5125/5156/5159/5176/23213/55959/9096/7042/3371/7490 | 3<br>1 |  |
| B<br>P | G<br>O:<br>00<br>30<br>27<br>8 | regulation of<br>ossification             | 24<br>/4<br>08 | 19<br>9/<br>17<br>91<br>3 | 2.8<br>5E<br>-1<br>1 | 6.7<br>2E<br>-0<br>9 | 4.9<br>1E<br>-0<br>9 | 56172/8313/658/1311/115908/4921/1893/5167/56975/2737/26585/9464/3082/3488/255743/4958/91461/5587/6423/6591/7042/7043/63923/7291                                  | 2<br>4 |  |
| B<br>P | G<br>O:<br>00<br>06<br>02<br>4 | glycosaminoglycan<br>biosynthetic process | 18<br>/4<br>08 | 10<br>7/<br>17<br>91<br>3 | 3.4<br>0E<br>-1<br>1 | 7.5<br>6E<br>-0<br>9 | 5.5<br>2E<br>-0<br>9 | 633/4166/1464/1634/29940/92126/2331/11227/2239/10082/3037/4060/4958/5159/5549/6383/1462/64131                                                                    | 1<br>8 |  |
| B<br>P | G<br>O:<br>00<br>06<br>02<br>3 | aminoglycan<br>biosynthetic process       | 18<br>/4<br>08 | 10<br>8/<br>17<br>91<br>3 | 4.0<br>0E<br>-1<br>1 | 8.3<br>9E<br>-0<br>9 | 6.1<br>3E<br>-0<br>9 | 633/4166/1464/1634/29940/92126/2331/11227/2239/10082/3037/4060/4958/5159/5549/6383/1462/64131                                                                    | 1<br>8 |  |

|        |                                |                                                                                   |                |                           |                      |                      |                      |                                                                                                                                                                                |        |
|--------|--------------------------------|-----------------------------------------------------------------------------------|----------------|---------------------------|----------------------|----------------------|----------------------|--------------------------------------------------------------------------------------------------------------------------------------------------------------------------------|--------|
| B<br>P | G<br>O:<br>00<br>60<br>48<br>5 | mesenchyme<br>development                                                         | 27<br>/4<br>08 | 25<br>8/<br>17<br>91<br>3 | 4.5<br>2E<br>-1<br>1 | 8.9<br>9E<br>-0<br>9 | 6.5<br>7E<br>-0<br>9 | 59/8313/54796/1277/1909/2042/2260/2335/2303/26585/9464/3037/3082/3357/4017/8828/5159/10630/90102/6423/6591/7042/7043/7291/7472/7490/23414                                      | 2<br>7 |
| B<br>P | G<br>O:<br>00<br>50<br>67<br>3 | epithelial cell<br>proliferation                                                  | 35<br>/4<br>08 | 42<br>5/<br>17<br>91<br>3 | 5.4<br>1E<br>-1<br>1 | 1.0<br>2E<br>-0<br>8 | 7.4<br>7E<br>-0<br>9 | 185/857/6356/1012/1295/1296/6387/9420/1893/2138/2191/2260/3037/3082/3357/5654/3488/3690/57608/687/4017/8828/5587/7857/5176/6423/6591/6678/23213/55959/7042/7057/7060/7291/7472 | 3<br>5 |
| B<br>P | G<br>O:<br>00<br>07<br>17<br>8 | transmembrane<br>receptor protein<br>serine/threonine kinase<br>signaling pathway | 30<br>/4<br>08 | 32<br>3/<br>17<br>91<br>3 | 7.3<br>8E<br>-1<br>1 | 1.3<br>3E<br>-0<br>8 | 9.7<br>0E<br>-0<br>9 | 54829/658/857/8483/1278/1281/1311/11117/2200/10979/2331/11167/26585/5654/94031/3624/4015/2615/4053/255743/56937/4920/6423/6424/23213/7042/7043/7057/7431/23090                 | 3<br>0 |
| B<br>P | G<br>O:<br>00<br>02<br>57<br>6 | platelet degranulation                                                            | 19<br>/4<br>08 | 12<br>8/<br>17<br>91<br>3 | 9.2<br>4E<br>-1<br>1 | 1.5<br>8E<br>-0<br>8 | 1.1<br>6E<br>-0<br>8 | 88/1893/2162/2316/2335/2621/3082/3671/3690/5099/5627/5919/5054/6678/7042/7043/7057/7076/7078                                                                                   | 1<br>9 |
| B<br>P | G<br>O:<br>00<br>72<br>00<br>1 | renal system<br>development                                                       | 28<br>/4<br>08 | 29<br>1/<br>17<br>91<br>3 | 1.4<br>2E<br>-1<br>0 | 2.3<br>4E<br>-0<br>8 | 1.7<br>1E<br>-0<br>8 | 59/170690/9370/185/9244/1634/2138/2200/2260/2303/2736/2737/84662/26585/3037/3764/55083/3976/255743/5125/5156/5159/5176/23213/55959/9096/7042/7490                              | 2<br>8 |
| B<br>P | G<br>O:<br>00<br>01<br>82<br>2 | kidney development                                                                | 27<br>/4<br>08 | 27<br>6/<br>17<br>91<br>3 | 2.1<br>1E<br>-1<br>0 | 3.2<br>6E<br>-0<br>8 | 2.3<br>8E<br>-0<br>8 | 59/170690/9370/185/9244/1634/2138/2200/2260/2303/2736/2737/84662/26585/3037/3764/55083/3976/255743/5125/5156/5159/5176/23213/55959/7042/7490                                   | 2<br>7 |
| B<br>P | G<br>O:<br>00                  | regulation of<br>cell-substrate adhesion                                          | 23<br>/4<br>08 | 20<br>1/<br>17            | 2.1<br>6E<br>-1      | 3.2<br>6E<br>-0      | 2.3<br>8E<br>-0      | 151887/1012/1307/1277/1295/10085/2042/2316/2335/26585/3037/3678/3956/91663/255743/10630/90102/5328/10631/5054/6695/7057/7070                                                   | 2<br>3 |

|        |                                |                                                                     |                |                           |                      |                      |                      |                                                                                                                                       |        |
|--------|--------------------------------|---------------------------------------------------------------------|----------------|---------------------------|----------------------|----------------------|----------------------|---------------------------------------------------------------------------------------------------------------------------------------|--------|
|        | 10<br>81<br>0                  |                                                                     |                | 91<br>3                   | 0                    | 8                    | 8                    |                                                                                                                                       |        |
| B<br>P | G<br>O:<br>00<br>71<br>55<br>9 | response to<br>transforming growth<br>factor beta                   | 25<br>/4<br>08 | 23<br>9/<br>17<br>91<br>3 | 2.4<br>3E<br>-1<br>0 | 3.5<br>3E<br>-0<br>8 | 2.5<br>8E<br>-0<br>8 | 54829/857/8483/1277/1278/1281/11117/2200/10979/2331/5654/94031/4015/2615/4053/25878/50507/255743/5139/56937/10631/7042/7043/7057/7472 | 2<br>5 |
| B<br>P | G<br>O:<br>00<br>60<br>34<br>8 | bone development                                                    | 22<br>/4<br>08 | 18<br>9/<br>17<br>91<br>3 | 3.8<br>5E<br>-1<br>0 | 5.3<br>9E<br>-0<br>8 | 3.9<br>4E<br>-0<br>8 | 8313/658/1277/1311/56975/2200/2737/26585/3037/4015/10234/9060/56034/6423/6424/6678/6781/23213/55959/7043/7291/64131                   | 2<br>2 |
| B<br>P | G<br>O:<br>00<br>71<br>56<br>0 | cellular response to<br>transforming growth<br>factor beta stimulus | 24<br>/4<br>08 | 23<br>3/<br>17<br>91<br>3 | 7.6<br>7E<br>-1<br>0 | 1.0<br>3E<br>-0<br>7 | 7.5<br>6E<br>-0<br>8 | 54829/857/8483/1277/1278/1281/11117/2200/10979/2331/5654/94031/4015/2615/4053/50507/255743/5139/56937/10631/7042/7043/7057/7472       | 2<br>4 |
| B<br>P | G<br>O:<br>00<br>33<br>62<br>7 | cell adhesion mediated<br>by integrin                               | 13<br>/4<br>08 | 61<br>/1<br>79<br>13      | 8.9<br>5E<br>-1<br>0 | 1.1<br>6E<br>-0<br>7 | 8.5<br>1E<br>-0<br>8 | 1307/1545/2200/2303/22801/3678/3690/255743/5328/5054/6423/6591/7042                                                                   | 1<br>3 |
| B<br>P | G<br>O:<br>00<br>48<br>76<br>2 | mesenchymal cell<br>differentiation                                 | 22<br>/4<br>08 | 19<br>9/<br>17<br>91<br>3 | 1.0<br>4E<br>-0<br>9 | 1.3<br>1E<br>-0<br>7 | 9.5<br>5E<br>-0<br>8 | 8313/1277/1909/2042/2260/2335/2303/26585/9464/3037/3082/3357/4017/8828/10630/90102/6423/6591/7042/7043/7291/7472                      | 2<br>2 |
| B<br>P | G<br>O:<br>00<br>48<br>77<br>1 | tissue remodeling                                                   | 20<br>/4<br>08 | 17<br>0/<br>17<br>91<br>3 | 2.0<br>3E<br>-0<br>9 | 2.4<br>7E<br>-0<br>7 | 1.8<br>0E<br>-0<br>7 | 558/633/857/1464/115908/1513/2303/2702/26585/9464/3488/3690/3953/3976/4286/50507/5745/7043/7060/7076                                  | 2<br>0 |



|        |                                |                                                 |                |                           |                      |                      |                      |                                                                                                                                                             |        |
|--------|--------------------------------|-------------------------------------------------|----------------|---------------------------|----------------------|----------------------|----------------------|-------------------------------------------------------------------------------------------------------------------------------------------------------------|--------|
| B<br>P | G<br>O:<br>00<br>30<br>20<br>3 | glycosaminoglycan<br>metabolic process          | 19<br>/4<br>08 | 15<br>7/<br>17<br>91<br>3 | 3.2<br>0E<br>-0<br>9 | 3.7<br>8E<br>-0<br>7 | 2.7<br>6E<br>-0<br>7 | 633/4166/1464/1634/29940/92126/2331/11227/2239/10082/3037/3082/4060/4958/5159/5549/6383/1462/64131                                                          | 1<br>9 |
| B<br>P | G<br>O:<br>00<br>60<br>54<br>1 | respiratory system<br>development               | 21<br>/4<br>08 | 19<br>3/<br>17<br>91<br>3 | 3.3<br>4E<br>-0<br>9 | 3.8<br>2E<br>-0<br>7 | 2.7<br>9E<br>-0<br>7 | 9509/220/83716/2260/2627/2736/2737/3488/3976/4015/9242/5156/5159/10630/91461/6678/7043/3371/7472/7490/23414                                                 | 2<br>1 |
| B<br>P | G<br>O:<br>00<br>35<br>98<br>7 | endodermal cell<br>differentiation              | 11<br>/4<br>08 | 45<br>/1<br>79<br>13      | 3.7<br>9E<br>-0<br>9 | 4.2<br>1E<br>-0<br>7 | 3.0<br>7E<br>-0<br>7 | 1301/1303/1289/1290/1291/1295/2335/2627/3624/3678/4313                                                                                                      | 1<br>1 |
| B<br>P | G<br>O:<br>00<br>42<br>47<br>6 | odontogenesis                                   | 17<br>/4<br>08 | 12<br>6/<br>17<br>91<br>3 | 4.1<br>0E<br>-0<br>9 | 4.4<br>2E<br>-0<br>7 | 3.2<br>3E<br>-0<br>7 | 54829/8313/1277/1278/56975/2736/2737/9464/5654/3624/9622/5156/5054/7042/7043/3371/7291                                                                      | 1<br>7 |
| B<br>P | G<br>O:<br>00<br>45<br>76<br>5 | regulation of<br>angiogenesis                   | 30<br>/4<br>08 | 38<br>3/<br>17<br>91<br>3 | 4.3<br>9E<br>-0<br>9 | 4.5<br>3E<br>-0<br>7 | 3.3<br>1E<br>-0<br>7 | 8038/185/6356/90993/1545/1634/1893/11117/2303/2627/26585/3082/3678/57608/4223/10769/5587/5740/5743/5054/5176/6423/6678/27286/23213/7042/7057/7058/7060/7291 | 3<br>0 |
| B<br>P | G<br>O:<br>00<br>07<br>36<br>9 | gastrulation                                    | 20<br>/4<br>08 | 17<br>8/<br>17<br>91<br>3 | 4.5<br>5E<br>-0<br>9 | 4.5<br>3E<br>-0<br>7 | 3.3<br>1E<br>-0<br>7 | 9370/1301/1303/1289/1290/1291/1295/2138/2260/2335/2303/2627/3624/3678/3690/4313/91663/90102/6423/26011                                                      | 2<br>0 |
| B<br>P | G<br>O:<br>00                  | regulation of<br>chondrocyte<br>differentiation | 11<br>/4<br>08 | 46<br>/1<br>79            | 4.8<br>8E<br>-0      | 4.5<br>3E<br>-0      | 3.3<br>1E<br>-0      | 81792/8313/658/2202/2736/2737/26585/4017/91461/5744/6591                                                                                                    | 1<br>1 |

|        |                                |                                                           |                |                           |                      |                      |                      |                                                                                                                                                  |        |
|--------|--------------------------------|-----------------------------------------------------------|----------------|---------------------------|----------------------|----------------------|----------------------|--------------------------------------------------------------------------------------------------------------------------------------------------|--------|
|        | 32<br>33<br>0                  |                                                           |                | 13                        | 9                    | 7                    | 7                    |                                                                                                                                                  |        |
| B<br>P | G<br>O:<br>00<br>06<br>02<br>2 | aminoglycan metabolic process                             | 19<br>/4<br>08 | 16<br>1/<br>17<br>91<br>3 | 4.8<br>9E<br>-0<br>9 | 4.5<br>3E<br>-0<br>7 | 3.3<br>1E<br>-0<br>7 | 633/4166/1464/1634/29940/92126/2331/11227/2239/10082/3037/3082/4060/4958/5159/5549/6383/1462/64131                                               | 1<br>9 |
| B<br>P | G<br>O:<br>00<br>90<br>28<br>7 | regulation of cellular response to growth factor stimulus | 25<br>/4<br>08 | 27<br>6/<br>17<br>91<br>3 | 4.9<br>1E<br>-0<br>9 | 4.5<br>3E<br>-0<br>7 | 3.3<br>1E<br>-0<br>7 | 81792/54829/857/90993/1634/11117/56975/2200/2260/26585/5654/94031/3678/3690/57608/4015/255743/56937/6423/6424/23213/55959/7043/7057/23090        | 2<br>5 |
| B<br>P | G<br>O:<br>00<br>02<br>06<br>3 | chondrocyte development                                   | 9/<br>40<br>8  | 27<br>/1<br>79<br>13      | 4.9<br>3E<br>-0<br>9 | 4.5<br>3E<br>-0<br>7 | 3.3<br>1E<br>-0<br>7 | 8313/658/1301/1311/1893/5744/6423/23213/55959                                                                                                    | 9      |
| B<br>P | G<br>O:<br>00<br>18<br>10<br>8 | peptidyl-tyrosine phosphorylation                         | 28<br>/4<br>08 | 34<br>6/<br>17<br>91<br>3 | 7.1<br>7E<br>-0<br>9 | 6.2<br>9E<br>-0<br>7 | 4.6<br>0E<br>-0<br>7 | 9370/558/857/1272/9244/1464/4921/2202/2042/2260/2621/2690/26585/3082/3678/3690/3976/50507/4915/56034/5156/5159/91461/4919/4920/6423/7060/7070    | 2<br>8 |
| B<br>P | G<br>O:<br>00<br>50<br>67<br>8 | regulation of epithelial cell proliferation               | 29<br>/4<br>08 | 36<br>9/<br>17<br>91<br>3 | 7.4<br>3E<br>-0<br>9 | 6.2<br>9E<br>-0<br>7 | 4.6<br>0E<br>-0<br>7 | 185/857/6356/1012/6387/9420/1893/2138/2260/3037/3357/5654/3690/57608/687/8828/5587/7857/5176/6423/6591/6678/23213/55959/7042/7057/7060/7291/7472 | 2<br>9 |
| B<br>P | G<br>O:<br>00<br>70<br>25<br>2 | actin-mediated cell contraction                           | 16<br>/4<br>08 | 11<br>5/<br>17<br>91<br>3 | 7.4<br>9E<br>-0<br>9 | 6.2<br>9E<br>-0<br>7 | 4.6<br>0E<br>-0<br>7 | 88/781/857/2316/122786/2702/23704/3764/4620/10630/6330/6444/6781/7168/7169/7431                                                                  | 1<br>6 |

|        |                                |                                                              |                |                           |                      |                      |                      |                                                                                                                                                          |        |
|--------|--------------------------------|--------------------------------------------------------------|----------------|---------------------------|----------------------|----------------------|----------------------|----------------------------------------------------------------------------------------------------------------------------------------------------------|--------|
| B<br>P | G<br>O:<br>00<br>60<br>53<br>7 | muscle tissue<br>development                                 | 30<br>/4<br>08 | 39<br>2/<br>17<br>91<br>3 | 7.5<br>0E<br>-0<br>9 | 6.2<br>9E<br>-0<br>7 | 4.6<br>0E<br>-0<br>7 | 88/857/1301/1281/1634/2138/2260/80206/2303/2627/2702/26585/3488/57158/3776/4015/4223/9242/50507/5156/5159/5999/6444/26011/7042/7168/7291/7472/7490/23414 | 3<br>0 |
| B<br>P | G<br>O:<br>00<br>18<br>21<br>2 | peptidyl-tyrosine<br>modification                            | 28<br>/4<br>08 | 34<br>9/<br>17<br>91<br>3 | 8.6<br>7E<br>-0<br>9 | 7.1<br>1E<br>-0<br>7 | 5.2<br>0E<br>-0<br>7 | 9370/558/857/1272/9244/1464/4921/2202/2042/2260/2621/2690/26585/3082/3678/3690/3976/50507/4915/56034/5156/5159/91461/4919/4920/6423/7060/7070            | 2<br>8 |
| B<br>P | G<br>O:<br>00<br>01<br>70<br>4 | formation of primary<br>germ layer                           | 16<br>/4<br>08 | 11<br>7/<br>17<br>91<br>3 | 9.6<br>6E<br>-0<br>9 | 7.6<br>0E<br>-0<br>7 | 5.5<br>5E<br>-0<br>7 | 1301/1303/1289/1290/1291/1295/2138/2260/2335/2303/2627/3624/3678/3690/4313/6423                                                                          | 1<br>6 |
| B<br>P | G<br>O:<br>00<br>60<br>02<br>1 | roof of mouth<br>development                                 | 14<br>/4<br>08 | 87<br>/1<br>79<br>13      | 9.6<br>7E<br>-0<br>9 | 7.6<br>0E<br>-0<br>7 | 5.5<br>5E<br>-0<br>7 | 54796/2737/9464/3624/2615/4223/9242/5156/91461/5396/6591/7042/7043/7291                                                                                  | 1<br>4 |
| B<br>P | G<br>O:<br>00<br>90<br>09<br>0 | negative regulation of<br>canonical Wnt signaling<br>pathway | 19<br>/4<br>08 | 16<br>9/<br>17<br>91<br>3 | 1.1<br>0E<br>-0<br>8 | 8.4<br>7E<br>-0<br>7 | 6.1<br>9E<br>-0<br>7 | 8313/80114/857/1000/115908/51339/2737/26585/23072/3489/85409/144165/27303/4920/6423/6424/6591/9096/63923                                                 | 1<br>9 |
| B<br>P | G<br>O:<br>00<br>70<br>16<br>7 | regulation of biomineral<br>tissue development               | 14<br>/4<br>08 | 88<br>/1<br>79<br>13      | 1.1<br>3E<br>-0<br>8 | 8.5<br>0E<br>-0<br>7 | 6.2<br>1E<br>-0<br>7 | 56172/54829/658/1311/4921/1893/5167/56975/2621/26585/4958/91461/7043/7291                                                                                | 1<br>4 |
| B<br>P | G<br>O:<br>00                  | negative regulation of<br>cell migration                     | 27<br>/4<br>08 | 33<br>2/<br>17            | 1.2<br>1E<br>-0      | 8.7<br>3E<br>-0      | 6.3<br>7E<br>-0      | 9370/4345/1281/6387/1588/1545/1634/1809/11117/26585/3488/4223/4286/89795/90102/127435/5592/5054/5176/6423/6781/23213/7057/7070/7076/63923/7168           | 2<br>7 |

|        |                                |                                          |                |                           |                      |                      |                      |                                                                                                                                                                  |        |
|--------|--------------------------------|------------------------------------------|----------------|---------------------------|----------------------|----------------------|----------------------|------------------------------------------------------------------------------------------------------------------------------------------------------------------|--------|
|        | 30<br>33<br>6                  |                                          |                | 91<br>3                   | 8                    | 7                    | 7                    |                                                                                                                                                                  |        |
| B<br>P | G<br>O:<br>00<br>03<br>01<br>2 | muscle system process                    | 32<br>/4<br>08 | 44<br>8/<br>17<br>91<br>3 | 1.2<br>3E<br>-0<br>8 | 8.7<br>3E<br>-0<br>7 | 6.3<br>7E<br>-0<br>7 | 59/88/781/800/857/1311/1410/1909/2316/2627/2702/2982/9464/3357/3488/23704/3764/29995/4620/10398/255743/5592/5743/5999/6330/6444/6781/23213/55959/7168/7169/7431  | 3<br>2 |
| B<br>P | G<br>O:<br>00<br>01<br>70<br>6 | endoderm formation                       | 11<br>/4<br>08 | 50<br>/1<br>79<br>13      | 1.2<br>6E<br>-0<br>8 | 8.7<br>3E<br>-0<br>7 | 6.3<br>7E<br>-0<br>7 | 1301/1303/1289/1290/1291/1295/2335/2627/3624/3678/4313                                                                                                           | 1<br>1 |
| B<br>P | G<br>O:<br>19<br>00<br>04<br>7 | negative regulation of hemostasis        | 11<br>/4<br>08 | 50<br>/1<br>79<br>13      | 1.2<br>6E<br>-0<br>8 | 8.7<br>3E<br>-0<br>7 | 6.3<br>7E<br>-0<br>7 | 170692/114897/1311/2191/5156/5328/5592/5627/5054/5270/7057                                                                                                       | 1<br>1 |
| B<br>P | G<br>O:<br>19<br>00<br>04<br>6 | regulation of hemostasis                 | 13<br>/4<br>08 | 75<br>/1<br>79<br>13      | 1.2<br>9E<br>-0<br>8 | 8.7<br>3E<br>-0<br>7 | 6.3<br>7E<br>-0<br>7 | 170692/114897/857/1311/2191/5156/10630/5328/5592/5627/5054/5270/7057                                                                                             | 1<br>3 |
| B<br>P | G<br>O:<br>19<br>01<br>34<br>2 | regulation of vasculature development    | 31<br>/4<br>08 | 42<br>5/<br>17<br>91<br>3 | 1.2<br>9E<br>-0<br>8 | 8.7<br>3E<br>-0<br>7 | 6.3<br>7E<br>-0<br>7 | 8038/185/6356/90993/1545/1634/1893/11117/2303/2627/26585/3082/3678/57608/4223/10769/5587/5740/5743/5054/5176/6423/6678/27286/23213/7042/7057/7058/7060/7291/7490 | 3<br>1 |
| B<br>P | G<br>O:<br>20<br>00<br>02<br>7 | regulation of animal organ morphogenesis | 23<br>/4<br>08 | 25<br>0/<br>17<br>91<br>3 | 1.5<br>3E<br>-0<br>8 | 1.0<br>1E<br>-0<br>6 | 7.3<br>9E<br>-0<br>7 | 54829/115908/51339/2138/2260/2303/2239/10082/26585/9464/3082/3976/144165/4919/4920/6423/6591/23213/55959/7042/7291/7472/7490                                     | 2<br>3 |

|        |                                |                                        |                |                           |                      |                      |                      |                                                                                                                                             |        |
|--------|--------------------------------|----------------------------------------|----------------|---------------------------|----------------------|----------------------|----------------------|---------------------------------------------------------------------------------------------------------------------------------------------|--------|
| B<br>P | G<br>O:<br>00<br>30<br>32<br>3 | respiratory tube<br>development        | 19<br>/4<br>08 | 17<br>3/<br>17<br>91<br>3 | 1.6<br>2E<br>-0<br>8 | 1.0<br>5E<br>-0<br>6 | 7.6<br>9E<br>-0<br>7 | 9509/83716/2260/2627/2736/2737/3488/3976/4015/5125/5156/5159/10630/91461/667<br>8/7043/3371/7472/23414                                      | 1<br>9 |
| B<br>P | G<br>O:<br>00<br>22<br>61<br>7 | extracellular matrix<br>disassembly    | 13<br>/4<br>08 | 78<br>/1<br>79<br>13      | 2.1<br>2E<br>-0<br>8 | 1.3<br>5E<br>-0<br>6 | 9.8<br>9E<br>-0<br>7 | 9507/1513/4921/2191/5654/4320/4327/4313/4314/10630/7076/7077/7092                                                                           | 1<br>3 |
| B<br>P | G<br>O:<br>00<br>01<br>65<br>4 | eye development                        | 27<br>/4<br>08 | 34<br>2/<br>17<br>91<br>3 | 2.2<br>6E<br>-0<br>8 | 1.4<br>2E<br>-0<br>6 | 1.0<br>4E<br>-0<br>6 | 170692/220/658/1289/1290/1295/1296/1410/1545/2202/2200/2303/2737/3624/4237/4<br>286/4915/5156/5159/5176/55714/7042/7070/7291/7431/7472/7490 | 2<br>7 |
| B<br>P | G<br>O:<br>00<br>06<br>93<br>6 | muscle contraction                     | 27<br>/4<br>08 | 34<br>3/<br>17<br>91<br>3 | 2.4<br>0E<br>-0<br>8 | 1.4<br>8E<br>-0<br>6 | 1.0<br>8E<br>-0<br>6 | 59/88/781/800/857/1311/1410/1909/2316/2702/2982/3357/23704/3764/4620/10398/25<br>5743/5592/5743/6330/6444/6781/23213/55959/7168/7169/7431   | 2<br>7 |
| B<br>P | G<br>O:<br>00<br>61<br>03<br>5 | regulation of cartilage<br>development | 12<br>/4<br>08 | 66<br>/1<br>79<br>13      | 2.6<br>9E<br>-0<br>8 | 1.6<br>4E<br>-0<br>6 | 1.2<br>0E<br>-0<br>6 | 81792/8313/658/1513/2202/2736/2737/26585/4017/91461/5744/6591                                                                               | 1<br>2 |
| B<br>P | G<br>O:<br>00<br>35<br>26<br>5 | organ growth                           | 19<br>/4<br>08 | 17<br>9/<br>17<br>91<br>3 | 2.8<br>3E<br>-0<br>8 | 1.6<br>9E<br>-0<br>6 | 1.2<br>4E<br>-0<br>6 | 54796/1311/1588/4921/1893/2121/2260/2303/2627/3776/3953/5159/5999/6781/26011<br>/7042/7472/7490/23414                                       | 1<br>9 |
| B<br>P | G<br>O:<br>01                  | visual system<br>development           | 27<br>/4<br>08 | 34<br>6/<br>17            | 2.8<br>8E<br>-0      | 1.7<br>0E<br>-0      | 1.2<br>4E<br>-0      | 170692/220/658/1289/1290/1295/1296/1410/1545/2202/2200/2303/2737/3624/4237/4<br>286/4915/5156/5159/5176/55714/7042/7070/7291/7431/7472/7490 | 2<br>7 |

|        |                                |                                             |                |                           |                      |                      |                      |                                                                                                                                                |        |
|--------|--------------------------------|---------------------------------------------|----------------|---------------------------|----------------------|----------------------|----------------------|------------------------------------------------------------------------------------------------------------------------------------------------|--------|
|        | 50<br>06<br>3                  |                                             |                | 91<br>3                   | 8                    | 6                    | 6                    |                                                                                                                                                |        |
| B<br>P | G<br>O:<br>20<br>00<br>14<br>6 | negative regulation of<br>cell motility     | 27<br>/4<br>08 | 34<br>7/<br>17<br>91<br>3 | 3.0<br>6E<br>-0<br>8 | 1.7<br>7E<br>-0<br>6 | 1.3<br>0E<br>-0<br>6 | 9370/4345/1281/6387/1588/1545/1634/1809/11117/26585/3488/4223/4286/89795/90102/127435/5592/5054/5176/6423/6781/23213/7057/7070/7076/63923/7168 | 2<br>7 |
| B<br>P | G<br>O:<br>00<br>45<br>66<br>7 | regulation of osteoblast<br>differentiation | 16<br>/4<br>08 | 12<br>8/<br>17<br>91<br>3 | 3.5<br>6E<br>-0<br>8 | 2.0<br>4E<br>-0<br>6 | 1.4<br>9E<br>-0<br>6 | 8313/658/115908/4921/56975/2737/26585/9464/3082/3488/255743/5587/6423/6591/63923/7291                                                          | 1<br>6 |
| B<br>P | G<br>O:<br>00<br>48<br>73<br>8 | cardiac muscle tissue<br>development        | 21<br>/4<br>08 | 22<br>1/<br>17<br>91<br>3 | 3.7<br>2E<br>-0<br>8 | 2.0<br>9E<br>-0<br>6 | 1.5<br>3E<br>-0<br>6 | 88/1301/2260/80206/2303/2627/2702/26585/57158/3776/50507/5156/5159/5999/6444/26011/7042/7168/7472/7490/23414                                   | 2<br>1 |
| B<br>P | G<br>O:<br>00<br>48<br>88<br>0 | sensory system<br>development               | 27<br>/4<br>08 | 35<br>1/<br>17<br>91<br>3 | 3.8<br>8E<br>-0<br>8 | 2.1<br>5E<br>-0<br>6 | 1.5<br>7E<br>-0<br>6 | 170692/220/658/1289/1290/1295/1296/1410/1545/2202/2200/2303/2737/3624/4237/4286/4915/5156/5159/5176/55714/7042/7070/7291/7431/7472/7490        | 2<br>7 |
| B<br>P | G<br>O:<br>00<br>45<br>76<br>6 | positive regulation of<br>angiogenesis      | 20<br>/4<br>08 | 20<br>3/<br>17<br>91<br>3 | 4.3<br>1E<br>-0<br>8 | 2.3<br>3E<br>-0<br>6 | 1.7<br>0E<br>-0<br>6 | 8038/185/6356/1545/1893/2303/2627/26585/3082/3678/57608/10769/5587/5740/5743/5054/6423/27286/7057/7291                                         | 2<br>0 |
| B<br>P | G<br>O:<br>00<br>14<br>70<br>6 | striated muscle tissue<br>development       | 28<br>/4<br>08 | 37<br>6/<br>17<br>91<br>3 | 4.3<br>1E<br>-0<br>8 | 2.3<br>3E<br>-0<br>6 | 1.7<br>0E<br>-0<br>6 | 88/857/1301/1634/2138/2260/80206/2303/2627/2702/26585/57158/3776/4015/4223/9242/50507/5156/5159/5999/6444/26011/7042/7168/7291/7472/7490/23414 | 2<br>8 |

|        |                                |                                      |                |                           |                      |                      |                      |                                                                                                                                                     |        |
|--------|--------------------------------|--------------------------------------|----------------|---------------------------|----------------------|----------------------|----------------------|-----------------------------------------------------------------------------------------------------------------------------------------------------|--------|
| B<br>P | G<br>O:<br>00<br>48<br>70<br>5 | skeletal system<br>morphogenesis     | 20<br>/4<br>08 | 20<br>4/<br>17<br>91<br>3 | 4.6<br>8E<br>-0<br>8 | 2.4<br>9E<br>-0<br>6 | 1.8<br>2E<br>-0<br>6 | 8313/658/1301/1277/1311/2138/2260/2303/2737/26585/3037/4313/5156/5396/4920/6423/6424/6781/7043/7291                                                 | 2<br>0 |
| B<br>P | G<br>O:<br>00<br>01<br>93<br>5 | endothelial cell<br>proliferation    | 19<br>/4<br>08 | 18<br>5/<br>17<br>91<br>3 | 4.8<br>3E<br>-0<br>8 | 2.5<br>3E<br>-0<br>6 | 1.8<br>5E<br>-0<br>6 | 185/857/6356/1012/6387/1893/2260/3357/3690/57608/4017/8828/5587/7857/6678/23213/7057/7060/7472                                                      | 1<br>9 |
| B<br>P | G<br>O:<br>00<br>07<br>51<br>7 | muscle organ<br>development          | 29<br>/4<br>08 | 40<br>3/<br>17<br>91<br>3 | 5.1<br>9E<br>-0<br>8 | 2.6<br>8E<br>-0<br>6 | 1.9<br>6E<br>-0<br>6 | 857/1301/1281/1293/1410/1634/2115/2121/2260/2303/2627/26585/22801/57158/3776/3976/4015/4223/9242/5999/6444/8910/6876/7042/7168/7291/7472/7490/23414 | 2<br>9 |
| B<br>P | G<br>O:<br>00<br>30<br>04<br>8 | actin filament-based<br>movement     | 16<br>/4<br>08 | 13<br>2/<br>17<br>91<br>3 | 5.5<br>3E<br>-0<br>8 | 2.8<br>2E<br>-0<br>6 | 2.0<br>6E<br>-0<br>6 | 88/781/857/2316/122786/2702/23704/3764/4620/10630/6330/6444/6781/7168/7169/7431                                                                     | 1<br>6 |
| B<br>P | G<br>O:<br>00<br>60<br>84<br>0 | artery development                   | 14<br>/4<br>08 | 10<br>0/<br>17<br>91<br>3 | 6.0<br>4E<br>-0<br>8 | 3.0<br>4E<br>-0<br>6 | 2.2<br>2E<br>-0<br>6 | 11174/1281/1311/2138/2303/2702/2737/9464/4015/4016/5159/144165/5396/7042                                                                            | 1<br>4 |
| B<br>P | G<br>O:<br>00<br>30<br>32<br>4 | lung development                     | 18<br>/4<br>08 | 16<br>9/<br>17<br>91<br>3 | 6.2<br>3E<br>-0<br>8 | 3.1<br>0E<br>-0<br>6 | 2.2<br>6E<br>-0<br>6 | 9509/83716/2260/2627/2736/2737/3488/3976/4015/5156/5159/10630/91461/6678/7043/3371/7472/23414                                                       | 1<br>8 |
| B<br>P | G<br>O:<br>00                  | regulation of bone<br>mineralization | 12<br>/4<br>08 | 71<br>/1<br>79            | 6.3<br>2E<br>-0      | 3.1<br>0E<br>-0      | 2.2<br>6E<br>-0      | 56172/658/1311/4921/1893/5167/56975/26585/4958/91461/7043/7291                                                                                      | 1<br>2 |

|        |                                |                                                    |                |                           |                      |                      |                      |                                                                                                                                                |        |
|--------|--------------------------------|----------------------------------------------------|----------------|---------------------------|----------------------|----------------------|----------------------|------------------------------------------------------------------------------------------------------------------------------------------------|--------|
|        | 30<br>50<br>0                  |                                                    |                | 13                        | 8                    | 6                    | 6                    |                                                                                                                                                |        |
| B<br>P | G<br>O:<br>00<br>70<br>52<br>7 | platelet aggregation                               | 11<br>/4<br>08 | 58<br>/1<br>79<br>13      | 6.5<br>1E<br>-0<br>8 | 3.1<br>5E<br>-0<br>6 | 2.3<br>0E<br>-0<br>6 | 170692/114897/1311/2316/2621/3690/10398/5156/10630/5592/5270                                                                                   | 1<br>1 |
| B<br>P | G<br>O:<br>00<br>01<br>93<br>6 | regulation of endothelial cell proliferation       | 18<br>/4<br>08 | 17<br>0/<br>17<br>91<br>3 | 6.8<br>3E<br>-0<br>8 | 3.2<br>6E<br>-0<br>6 | 2.3<br>8E<br>-0<br>6 | 185/857/6356/1012/6387/1893/2260/3357/3690/57608/8828/5587/7857/6678/23213/7057/7060/7472                                                      | 1<br>8 |
| B<br>P | G<br>O:<br>00<br>51<br>27<br>1 | negative regulation of cellular component movement | 27<br>/4<br>08 | 36<br>5/<br>17<br>91<br>3 | 8.6<br>6E<br>-0<br>8 | 4.0<br>9E<br>-0<br>6 | 2.9<br>9E<br>-0<br>6 | 9370/4345/1281/6387/1588/1545/1634/1809/11117/26585/3488/4223/4286/89795/90102/127435/5592/5054/5176/6423/6781/23213/7057/7070/7076/63923/7168 | 2<br>7 |
| B<br>P | G<br>O:<br>00<br>30<br>19<br>3 | regulation of blood coagulation                    | 12<br>/4<br>08 | 74<br>/1<br>79<br>13      | 1.0<br>2E<br>-0<br>7 | 4.7<br>4E<br>-0<br>6 | 3.4<br>7E<br>-0<br>6 | 170692/114897/857/2191/5156/10630/5328/5592/5627/5054/5270/7057                                                                                | 1<br>2 |
| B<br>P | G<br>O:<br>00<br>30<br>57<br>4 | collagen catabolic process                         | 9/<br>40<br>8  | 37<br>/1<br>79<br>13      | 1.0<br>7E<br>-0<br>7 | 4.9<br>2E<br>-0<br>6 | 3.5<br>9E<br>-0<br>6 | 140766/9509/1306/1513/2191/4320/4313/4314/9902                                                                                                 | 9      |
| B<br>P | G<br>O:<br>00<br>30<br>20<br>8 | dermatan sulfate biosynthetic process              | 6/<br>40<br>8  | 12<br>/1<br>79<br>13      | 1.1<br>1E<br>-0<br>7 | 5.0<br>4E<br>-0<br>6 | 3.6<br>8E<br>-0<br>6 | 633/1464/1634/29940/92126/1462                                                                                                                 | 6      |



|        |                                |                                                             |                |                           |                      |                      |                      |                                                                                                                                                                                         |        |
|--------|--------------------------------|-------------------------------------------------------------|----------------|---------------------------|----------------------|----------------------|----------------------|-----------------------------------------------------------------------------------------------------------------------------------------------------------------------------------------|--------|
| B<br>P | G<br>O:<br>00<br>06<br>02<br>7 | glycosaminoglycan<br>catabolic process                      | 11<br>/4<br>08 | 61<br>/1<br>79<br>13      | 1.1<br>2E<br>-0<br>7 | 5.0<br>6E<br>-0<br>6 | 3.6<br>9E<br>-0<br>6 | 633/1464/1634/2331/2239/10082/4060/4958/5549/6383/1462                                                                                                                                  | 1<br>1 |
| B<br>P | G<br>O:<br>00<br>30<br>19<br>5 | negative regulation of<br>blood coagulation                 | 10<br>/4<br>08 | 49<br>/1<br>79<br>13      | 1.2<br>5E<br>-0<br>7 | 5.5<br>6E<br>-0<br>6 | 4.0<br>6E<br>-0<br>6 | 170692/114897/2191/5156/5328/5592/5627/5054/5270/7057                                                                                                                                   | 1<br>0 |
| B<br>P | G<br>O:<br>00<br>01<br>66<br>7 | ameboidal-type cell<br>migration                            | 30<br>/4<br>08 | 44<br>6/<br>17<br>91<br>3 | 1.3<br>4E<br>-0<br>7 | 5.9<br>0E<br>-0<br>6 | 4.3<br>1E<br>-0<br>6 | 9590/1012/1545/1634/4921/2191/2260/2335/2303/26585/9464/3037/3357/3690/57608<br>/4017/4223/8828/10769/5587/5743/7857/5176/6678/27286/6781/7042/7057/7076/729<br>1                       | 3<br>0 |
| B<br>P | G<br>O:<br>00<br>30<br>17<br>8 | negative regulation of<br>Wnt signaling pathway             | 19<br>/4<br>08 | 19<br>8/<br>17<br>91<br>3 | 1.4<br>3E<br>-0<br>7 | 6.1<br>3E<br>-0<br>6 | 4.4<br>8E<br>-0<br>6 | 8313/80114/857/1000/115908/51339/2737/26585/23072/3489/85409/144165/27303/4<br>920/6423/6424/6591/9096/63923                                                                            | 1<br>9 |
| B<br>P | G<br>O:<br>00<br>01<br>93<br>8 | positive regulation of<br>endothelial cell<br>proliferation | 14<br>/4<br>08 | 10<br>7/<br>17<br>91<br>3 | 1.4<br>4E<br>-0<br>7 | 6.1<br>3E<br>-0<br>6 | 4.4<br>8E<br>-0<br>6 | 185/6356/1012/6387/1893/2260/3357/3690/57608/8828/5587/7857/7060/7472                                                                                                                   | 1<br>4 |
| B<br>P | G<br>O:<br>00<br>16<br>05<br>5 | Wnt signaling pathway                                       | 32<br>/4<br>08 | 49<br>8/<br>17<br>91<br>3 | 1.4<br>4E<br>-0<br>7 | 6.1<br>3E<br>-0<br>6 | 4.4<br>8E<br>-0<br>6 | 8313/80114/857/1000/1277/1363/8532/115908/51339/10979/2737/2239/10082/26585/<br>23072/3489/4286/85409/144165/26108/27303/4919/4920/6423/6424/6591/23213/559<br>59/9096/83439/63923/7472 | 3<br>2 |
| B<br>P | G<br>O:<br>00                  | positive regulation of<br>epithelial cell<br>proliferation  | 19<br>/4<br>08 | 19<br>9/<br>17            | 1.5<br>5E<br>-0      | 6.4<br>8E<br>-0      | 4.7<br>4E<br>-0      | 185/6356/1012/6387/9420/1893/2138/2260/3037/3357/5654/3690/57608/8828/5587/7<br>857/7060/7291/7472                                                                                      | 1<br>9 |

|        |                                |                                       |                |                           |                      |                      |                      |                                                                                                                                                                                         |        |
|--------|--------------------------------|---------------------------------------|----------------|---------------------------|----------------------|----------------------|----------------------|-----------------------------------------------------------------------------------------------------------------------------------------------------------------------------------------|--------|
|        | 50<br>67<br>9                  |                                       |                | 91<br>3                   | 7                    | 6                    | 6                    |                                                                                                                                                                                         |        |
| B<br>P | G<br>O:<br>01<br>98<br>73<br>8 | cell-cell signaling by<br>wnt         | 32<br>/4<br>08 | 50<br>0/<br>17<br>91<br>3 | 1.5<br>8E<br>-0<br>7 | 6.5<br>1E<br>-0<br>6 | 4.7<br>5E<br>-0<br>6 | 8313/80114/857/1000/1277/1363/8532/115908/51339/10979/2737/2239/10082/26585/<br>23072/3489/4286/85409/144165/26108/27303/4919/4920/6423/6424/6591/23213/559<br>59/9096/83439/63923/7472 | 3<br>2 |
| B<br>P | G<br>O:<br>00<br>06<br>02<br>6 | aminoglycan catabolic<br>process      | 11<br>/4<br>08 | 63<br>/1<br>79<br>13      | 1.5<br>9E<br>-0<br>7 | 6.5<br>1E<br>-0<br>6 | 4.7<br>5E<br>-0<br>6 | 633/1464/1634/2331/2239/10082/4060/4958/5549/6383/1462                                                                                                                                  | 1<br>1 |
| B<br>P | G<br>O:<br>00<br>34<br>10<br>9 | homotypic cell-cell<br>adhesion       | 12<br>/4<br>08 | 77<br>/1<br>79<br>13      | 1.6<br>0E<br>-0<br>7 | 6.5<br>1E<br>-0<br>6 | 4.7<br>5E<br>-0<br>6 | 170692/114897/1311/2316/2621/3690/3956/10398/5156/10630/5592/5270                                                                                                                       | 1<br>2 |
| B<br>P | G<br>O:<br>00<br>40<br>01<br>3 | negative regulation of<br>locomotion  | 27<br>/4<br>08 | 37<br>7/<br>17<br>91<br>3 | 1.6<br>7E<br>-0<br>7 | 6.7<br>0E<br>-0<br>6 | 4.8<br>9E<br>-0<br>6 | 9370/4345/1281/6387/1588/1545/1634/1809/11117/26585/3488/4223/4286/89795/901<br>02/127435/5592/5054/5176/6423/6781/23213/7057/7070/7076/63923/7168                                      | 2<br>7 |
| B<br>P | G<br>O:<br>00<br>07<br>59<br>6 | blood coagulation                     | 25<br>/4<br>08 | 33<br>1/<br>17<br>91<br>3 | 1.7<br>7E<br>-0<br>7 | 7.0<br>4E<br>-0<br>6 | 5.1<br>4E<br>-0<br>6 | 170692/114897/857/1277/1278/1281/1311/2162/2151/2191/2316/2621/2627/3690/103<br>98/9060/5156/10630/5328/5592/5627/5054/5270/7057/23414                                                  | 2<br>5 |
| B<br>P | G<br>O:<br>00<br>30<br>20<br>5 | dermatan sulfate<br>metabolic process | 6/<br>40<br>8  | 13<br>/1<br>79<br>13      | 2.0<br>2E<br>-0<br>7 | 7.8<br>5E<br>-0<br>6 | 5.7<br>4E<br>-0<br>6 | 633/1464/1634/29940/92126/1462                                                                                                                                                          | 6      |

|        |                                |                                                                  |                |                           |                      |                      |                      |                                                                                                                                     |        |
|--------|--------------------------------|------------------------------------------------------------------|----------------|---------------------------|----------------------|----------------------|----------------------|-------------------------------------------------------------------------------------------------------------------------------------|--------|
| B<br>P | G<br>O:<br>00<br>70<br>20<br>8 | protein<br>heterotrimerization                                   | 6/<br>40<br>8  | 13<br>/1<br>79<br>13      | 2.0<br>2E<br>-0<br>7 | 7.8<br>5E<br>-0<br>6 | 5.7<br>4E<br>-0<br>6 | 9370/114897/1277/1278/1291/1292                                                                                                     | 6      |
| B<br>P | G<br>O:<br>00<br>60<br>07<br>0 | canonical Wnt signaling<br>pathway                               | 24<br>/4<br>08 | 31<br>/1<br>17<br>91<br>3 | 2.1<br>1E<br>-0<br>7 | 8.0<br>9E<br>-0<br>6 | 5.9<br>1E<br>-0<br>6 | 8313/80114/857/1000/1277/115908/51339/2737/26585/23072/3489/4286/85409/144165/26108/27303/4920/6423/6424/6591/55959/9096/63923/7472 | 2<br>4 |
| B<br>P | G<br>O:<br>00<br>06<br>02<br>9 | proteoglycan metabolic<br>process                                | 12<br>/4<br>08 | 79<br>/1<br>79<br>13      | 2.1<br>4E<br>-0<br>7 | 8.0<br>9E<br>-0<br>6 | 5.9<br>1E<br>-0<br>6 | 81792/633/658/1301/1464/1634/29940/92126/23213/55959/1462/64131                                                                     | 1<br>2 |
| B<br>P | G<br>O:<br>00<br>50<br>81<br>8 | regulation of<br>coagulation                                     | 12<br>/4<br>08 | 79<br>/1<br>79<br>13      | 2.1<br>4E<br>-0<br>7 | 8.0<br>9E<br>-0<br>6 | 5.9<br>1E<br>-0<br>6 | 170692/114897/857/2191/5156/10630/5328/5592/5627/5054/5270/7057                                                                     | 1<br>2 |
| B<br>P | G<br>O:<br>00<br>07<br>17<br>9 | transforming growth<br>factor beta receptor<br>signaling pathway | 18<br>/4<br>08 | 18<br>/4<br>17<br>91<br>3 | 2.2<br>8E<br>-0<br>7 | 8.5<br>3E<br>-0<br>6 | 6.2<br>3E<br>-0<br>6 | 54829/857/1278/1281/11117/2200/10979/2331/5654/94031/4015/2615/4053/255743/56937/7042/7043/7057                                     | 1<br>8 |
| B<br>P | G<br>O:<br>00<br>07<br>59<br>9 | hemostasis                                                       | 25<br>/4<br>08 | 33<br>/6<br>17<br>91<br>3 | 2.3<br>6E<br>-0<br>7 | 8.7<br>2E<br>-0<br>6 | 6.3<br>7E<br>-0<br>6 | 170692/114897/857/1277/1278/1281/1311/2162/2151/2191/2316/2621/2627/3690/10398/9060/5156/10630/5328/5592/5627/5054/5270/7057/23414  | 2<br>5 |
| B<br>P | G<br>O:<br>00                  | coagulation                                                      | 25<br>/4<br>08 | 33<br>/7<br>17            | 2.4<br>9E<br>-0      | 9.1<br>3E<br>-0      | 6.6<br>7E<br>-0      | 170692/114897/857/1277/1278/1281/1311/2162/2151/2191/2316/2621/2627/3690/10398/9060/5156/10630/5328/5592/5627/5054/5270/7057/23414  | 2<br>5 |

|        |                                |                                                      |                |                           |                      |                      |                      |                                                                                                                       |        |
|--------|--------------------------------|------------------------------------------------------|----------------|---------------------------|----------------------|----------------------|----------------------|-----------------------------------------------------------------------------------------------------------------------|--------|
|        | 50<br>81<br>7                  |                                                      |                | 91<br>3                   | 7                    | 6                    | 6                    |                                                                                                                       |        |
| B<br>P | G<br>O:<br>19<br>03<br>51<br>0 | mucopolysaccharide<br>metabolic process              | 14<br>/4<br>08 | 11<br>2/<br>17<br>91<br>3 | 2.5<br>6E<br>-0<br>7 | 9.3<br>0E<br>-0<br>6 | 6.7<br>9E<br>-0<br>6 | 633/4166/1464/1634/29940/92126/2331/3037/3082/4060/4958/5549/1462/64131                                               | 1<br>4 |
| B<br>P | G<br>O:<br>00<br>50<br>81<br>9 | negative regulation of<br>coagulation                | 10<br>/4<br>08 | 53<br>/1<br>79<br>13      | 2.7<br>4E<br>-0<br>7 | 9.8<br>5E<br>-0<br>6 | 7.1<br>9E<br>-0<br>6 | 170692/114897/2191/5156/5328/5592/5627/5054/5270/7057                                                                 | 1<br>0 |
| B<br>P | G<br>O:<br>00<br>90<br>59<br>6 | sensory organ<br>morphogenesis                       | 21<br>/4<br>08 | 25<br>0/<br>17<br>91<br>3 | 3.0<br>4E<br>-0<br>7 | 1.0<br>8E<br>-0<br>5 | 7.9<br>1E<br>-0<br>6 | 220/1301/1289/1290/1295/1296/115908/2202/2138/2200/2260/2736/2737/4237/4915/<br>5396/4920/55714/7070/7291/7472        | 2<br>1 |
| B<br>P | G<br>O:<br>00<br>43<br>01<br>0 | camera-type eye<br>development                       | 23<br>/4<br>08 | 29<br>5/<br>17<br>91<br>3 | 3.1<br>6E<br>-0<br>7 | 1.1<br>2E<br>-0<br>5 | 8.1<br>5E<br>-0<br>6 | 220/658/1295/1296/1410/1545/2202/2200/2303/2737/3624/4286/4915/5156/5159/517<br>6/55714/7042/7070/7291/7431/7472/7490 | 2<br>3 |
| B<br>P | G<br>O:<br>00<br>08<br>21<br>7 | regulation of blood<br>pressure                      | 17<br>/4<br>08 | 16<br>9/<br>17<br>91<br>3 | 3.3<br>2E<br>-0<br>7 | 1.1<br>6E<br>-0<br>5 | 8.4<br>8E<br>-0<br>6 | 59/170690/9370/185/552/1066/1278/10699/1909/2621/2702/2982/4883/5125/10631/5<br>743/7168                              | 1<br>7 |
| B<br>P | G<br>O:<br>19<br>04<br>01<br>8 | positive regulation of<br>vasculature<br>development | 20<br>/4<br>08 | 23<br>2/<br>17<br>91<br>3 | 3.8<br>5E<br>-0<br>7 | 1.3<br>3E<br>-0<br>5 | 9.7<br>4E<br>-0<br>6 | 8038/185/6356/1545/1893/2303/2627/26585/3082/3678/57608/10769/5587/5740/5743<br>/5054/6423/27286/7057/7291            | 2<br>0 |

|        |                                |                                                                          |                |                           |                      |                      |                      |                                                                                                                                             |        |
|--------|--------------------------------|--------------------------------------------------------------------------|----------------|---------------------------|----------------------|----------------------|----------------------|---------------------------------------------------------------------------------------------------------------------------------------------|--------|
| B<br>P | G<br>O:<br>00<br>22<br>61<br>2 | gland morphogenesis                                                      | 14<br>/4<br>08 | 11<br>6/<br>17<br>91<br>3 | 3.9<br>7E<br>-0<br>7 | 1.3<br>6E<br>-0<br>5 | 9.9<br>6E<br>-0<br>6 | 857/6356/9420/2260/2736/2737/3082/3488/6591/23213/55959/7042/7043/3371                                                                      | 1<br>4 |
| B<br>P | G<br>O:<br>00<br>50<br>65<br>1 | dermatan sulfate<br>proteoglycan<br>biosynthetic process                 | 6/<br>40<br>8  | 15<br>/1<br>79<br>13      | 5.6<br>6E<br>-0<br>7 | 1.8<br>9E<br>-0<br>5 | 1.3<br>8E<br>-0<br>5 | 633/1464/1634/29940/92126/1462                                                                                                              | 6      |
| B<br>P | G<br>O:<br>00<br>90<br>28<br>8 | negative regulation of<br>cellular response to<br>growth factor stimulus | 16<br>/4<br>08 | 15<br>6/<br>17<br>91<br>3 | 5.6<br>6E<br>-0<br>7 | 1.8<br>9E<br>-0<br>5 | 1.3<br>8E<br>-0<br>5 | 81792/54829/857/90993/1634/11117/2200/26585/5654/94031/56937/6423/23213/55959/7043/7057                                                     | 1<br>6 |
| B<br>P | G<br>O:<br>00<br>48<br>60<br>8 | reproductive structure<br>development                                    | 28<br>/4<br>08 | 42<br>6/<br>17<br>91<br>3 | 5.6<br>6E<br>-0<br>7 | 1.8<br>9E<br>-0<br>5 | 1.3<br>8E<br>-0<br>5 | 558/658/1588/9420/1634/2316/2627/2736/2737/5654/3624/3976/4327/5156/5159/5740/5743/4920/5270/5176/6423/6781/23213/7042/3371/7472/7490/23414 | 2<br>8 |
| B<br>P | G<br>O:<br>00<br>48<br>73<br>6 | appendage<br>development                                                 | 17<br>/4<br>08 | 17<br>6/<br>17<br>91<br>3 | 5.9<br>2E<br>-0<br>7 | 1.9<br>4E<br>-0<br>5 | 1.4<br>2E<br>-0<br>5 | 658/1311/2260/2702/2736/2737/26585/9464/4223/5125/91461/5396/4920/57167/6423/7042/7291                                                      | 1<br>7 |
| B<br>P | G<br>O:<br>00<br>60<br>17<br>3 | limb development                                                         | 17<br>/4<br>08 | 17<br>6/<br>17<br>91<br>3 | 5.9<br>2E<br>-0<br>7 | 1.9<br>4E<br>-0<br>5 | 1.4<br>2E<br>-0<br>5 | 658/1311/2260/2702/2736/2737/26585/9464/4223/5125/91461/5396/4920/57167/6423/7042/7291                                                      | 1<br>7 |
| B<br>P | G<br>O:<br>00                  | reproductive system<br>development                                       | 28<br>/4<br>08 | 42<br>9/<br>17            | 6.5<br>2E<br>-0      | 2.1<br>2E<br>-0      | 1.5<br>5E<br>-0      | 558/658/1588/9420/1634/2316/2627/2736/2737/5654/3624/3976/4327/5156/5159/5740/5743/4920/5270/5176/6423/6781/23213/7042/3371/7472/7490/23414 | 2<br>8 |

|        |                                |                                                  |                |                           |                      |                      |                      |                                                                                                                         |        |
|--------|--------------------------------|--------------------------------------------------|----------------|---------------------------|----------------------|----------------------|----------------------|-------------------------------------------------------------------------------------------------------------------------|--------|
|        | 61<br>45<br>8                  |                                                  |                | 91<br>3                   | 7                    | 5                    | 5                    |                                                                                                                         |        |
| B<br>P | G<br>O:<br>00<br>61<br>13<br>8 | morphogenesis of a<br>branching epithelium       | 17<br>/4<br>08 | 17<br>8/<br>17<br>91<br>3 | 6.9<br>5E<br>-0<br>7 | 2.2<br>4E<br>-0<br>5 | 1.6<br>4E<br>-0<br>5 | 170690/6356/1909/2138/2260/2303/2736/2737/26585/3082/255743/6423/6591/23213/<br>3371/7472/7490                          | 1<br>7 |
| B<br>P | G<br>O:<br>00<br>01<br>83<br>7 | epithelial to<br>mesenchymal transition          | 15<br>/4<br>08 | 14<br>0/<br>17<br>91<br>3 | 7.3<br>0E<br>-0<br>7 | 2.3<br>3E<br>-0<br>5 | 1.7<br>1E<br>-0<br>5 | 8313/1277/2042/26585/3037/3082/4017/10630/90102/6423/6591/7042/7043/7291/747<br>2                                       | 1<br>5 |
| B<br>P | G<br>O:<br>00<br>60<br>82<br>8 | regulation of canonical<br>Wnt signaling pathway | 21<br>/4<br>08 | 26<br>4/<br>17<br>91<br>3 | 7.4<br>7E<br>-0<br>7 | 2.3<br>4E<br>-0<br>5 | 1.7<br>1E<br>-0<br>5 | 8313/80114/857/1000/1277/115908/51339/2737/26585/23072/3489/85409/144165/27<br>303/4920/6423/6424/6591/55959/9096/63923 | 2<br>1 |
| B<br>P | G<br>O:<br>00<br>07<br>49<br>2 | endoderm development                             | 11<br>/4<br>08 | 73<br>/1<br>79<br>13      | 7.4<br>9E<br>-0<br>7 | 2.3<br>4E<br>-0<br>5 | 1.7<br>1E<br>-0<br>5 | 1301/1303/1289/1290/1291/1295/2335/2627/3624/3678/4313                                                                  | 1<br>1 |
| B<br>P | G<br>O:<br>00<br>61<br>04<br>5 | negative regulation of<br>wound healing          | 11<br>/4<br>08 | 73<br>/1<br>79<br>13      | 7.4<br>9E<br>-0<br>7 | 2.3<br>4E<br>-0<br>5 | 1.7<br>1E<br>-0<br>5 | 170692/114897/2191/5156/90102/5328/5592/5627/5054/5270/7057                                                             | 1<br>1 |
| B<br>P | G<br>O:<br>00<br>72<br>00<br>6 | nephron development                              | 15<br>/4<br>08 | 14<br>2/<br>17<br>91<br>3 | 8.7<br>6E<br>-0<br>7 | 2.7<br>0E<br>-0<br>5 | 1.9<br>7E<br>-0<br>5 | 59/170690/9370/2138/2303/2737/26585/55083/3976/255743/5156/5159/23213/55959/<br>7490                                    | 1<br>5 |

|        |                                |                                                 |                |                           |                      |                      |                      |                                                                                                                 |        |
|--------|--------------------------------|-------------------------------------------------|----------------|---------------------------|----------------------|----------------------|----------------------|-----------------------------------------------------------------------------------------------------------------|--------|
| B<br>P | G<br>O:<br>19<br>05<br>33<br>0 | regulation of morphogenesis of an epithelium    | 17<br>/4<br>08 | 18<br>/1<br>17<br>91<br>3 | 8.7<br>9E<br>-0<br>7 | 2.7<br>0E<br>-0<br>5 | 1.9<br>7E<br>-0<br>5 | 81792/115908/51339/2260/2239/10082/26585/3082/3976/90102/144165/4919/4920/6423/6591/23213/7472                  | 1<br>7 |
| B<br>P | G<br>O:<br>00<br>50<br>65<br>5 | dermatan sulfate proteoglycan metabolic process | 6/<br>40<br>8  | 16<br>/1<br>79<br>13      | 8.8<br>8E<br>-0<br>7 | 2.7<br>0E<br>-0<br>5 | 1.9<br>8E<br>-0<br>5 | 633/1464/1634/29940/92126/1462                                                                                  | 6      |
| B<br>P | G<br>O:<br>00<br>48<br>64<br>5 | animal organ formation                          | 10<br>/4<br>08 | 61<br>/1<br>79<br>13      | 1.0<br>8E<br>-0<br>6 | 3.2<br>5E<br>-0<br>5 | 2.3<br>8E<br>-0<br>5 | 8313/2138/2260/2627/2736/2737/9464/23213/7472/7490                                                              | 1<br>0 |
| B<br>P | G<br>O:<br>00<br>07<br>16<br>2 | negative regulation of cell adhesion            | 21<br>/4<br>08 | 27<br>/1<br>17<br>91<br>3 | 1.1<br>4E<br>-0<br>6 | 3.4<br>2E<br>-0<br>5 | 2.5<br>0E<br>-0<br>5 | 170692/9370/114897/1012/1277/6387/1545/2737/3956/2615/91663/90102/10631/5592/5054/5270/6591/6695/7045/7057/3371 | 2<br>1 |
| B<br>P | G<br>O:<br>00<br>44<br>27<br>3 | sulfur compound catabolic process               | 9/<br>40<br>8  | 48<br>/1<br>79<br>13      | 1.1<br>5E<br>-0<br>6 | 3.4<br>3E<br>-0<br>5 | 2.5<br>1E<br>-0<br>5 | 633/1464/1634/2331/2687/4060/4958/5549/1462                                                                     | 9      |
| B<br>P | G<br>O:<br>00<br>03<br>00<br>7 | heart morphogenesis                             | 20<br>/4<br>08 | 24<br>/9<br>17<br>91<br>3 | 1.1<br>8E<br>-0<br>6 | 3.4<br>8E<br>-0<br>5 | 2.5<br>4E<br>-0<br>5 | 8313/1301/1289/1363/2138/23768/2303/2627/2702/9464/3037/3357/8828/6423/6591/7042/7168/7291/7472/23414           | 2<br>0 |
| B<br>P | G<br>O:<br>00                  | appendage morphogenesis                         | 15<br>/4<br>08 | 14<br>/6<br>17            | 1.2<br>5E<br>-0      | 3.6<br>3E<br>-0      | 2.6<br>5E<br>-0      | 658/2260/2702/2736/2737/26585/9464/5125/91461/5396/4920/57167/6423/7042/7291                                    | 1<br>5 |

|        |                                |                                              |                |                           |                      |                      |                      |                                                                                                              |        |
|--------|--------------------------------|----------------------------------------------|----------------|---------------------------|----------------------|----------------------|----------------------|--------------------------------------------------------------------------------------------------------------|--------|
|        | 35<br>10<br>7                  |                                              |                | 91<br>3                   | 6                    | 5                    | 5                    |                                                                                                              |        |
| B<br>P | G<br>O:<br>00<br>35<br>10<br>8 | limb morphogenesis                           | 15<br>/4<br>08 | 14<br>6/<br>17<br>91<br>3 | 1.2<br>5E<br>-0<br>6 | 3.6<br>3E<br>-0<br>5 | 2.6<br>5E<br>-0<br>5 | 658/2260/2702/2736/2737/26585/9464/5125/91461/5396/4920/57167/6423/7042/7291                                 | 1<br>5 |
| B<br>P | G<br>O:<br>00<br>61<br>03<br>7 | negative regulation of cartilage development | 7/<br>40<br>8  | 26<br>/1<br>79<br>13      | 1.3<br>7E<br>-0<br>6 | 3.9<br>1E<br>-0<br>5 | 2.8<br>6E<br>-0<br>5 | 81792/1513/2202/2736/26585/5744/6591                                                                         | 7      |
| B<br>P | G<br>O:<br>00<br>98<br>86<br>8 | bone growth                                  | 7/<br>40<br>8  | 26<br>/1<br>79<br>13      | 1.3<br>7E<br>-0<br>6 | 3.9<br>1E<br>-0<br>5 | 2.8<br>6E<br>-0<br>5 | 54796/1311/4921/1893/2121/3953/6781                                                                          | 7      |
| B<br>P | G<br>O:<br>00<br>43<br>54<br>2 | endothelial cell migration                   | 21<br>/4<br>08 | 27<br>5/<br>17<br>91<br>3 | 1.4<br>5E<br>-0<br>6 | 4.1<br>1E<br>-0<br>5 | 3.0<br>0E<br>-0<br>5 | 1012/1545/1634/2191/2260/2303/26585/3690/57608/4017/4223/8828/10769/5587/5743/7857/5176/6678/27286/6781/7057 | 2<br>1 |
| B<br>P | G<br>O:<br>00<br>45<br>77<br>8 | positive regulation of ossification          | 12<br>/4<br>08 | 94<br>/1<br>79<br>13      | 1.4<br>7E<br>-0<br>6 | 4.1<br>4E<br>-0<br>5 | 3.0<br>3E<br>-0<br>5 | 658/115908/4921/56975/2737/3082/255743/91461/5587/6423/7042/7043                                             | 1<br>2 |
| B<br>P | G<br>O:<br>00<br>71<br>23<br>0 | cellular response to amino acid stimulus     | 10<br>/4<br>08 | 64<br>/1<br>79<br>13      | 1.7<br>0E<br>-0<br>6 | 4.7<br>6E<br>-0<br>5 | 3.4<br>8E<br>-0<br>5 | 1307/1277/1278/1281/1290/1291/4313/4915/56034/5156                                                           | 1<br>0 |



|        |                                |                                                                                                    |                |                           |                      |                      |                      |                                                                                                        |        |
|--------|--------------------------------|----------------------------------------------------------------------------------------------------|----------------|---------------------------|----------------------|----------------------|----------------------|--------------------------------------------------------------------------------------------------------|--------|
| B<br>P | G<br>O:<br>00<br>03<br>20<br>5 | cardiac chamber<br>development                                                                     | 16<br>/4<br>08 | 17<br>0/<br>17<br>91<br>3 | 1.7<br>9E<br>-0<br>6 | 4.9<br>8E<br>-0<br>5 | 3.6<br>4E<br>-0<br>5 | 11174/1301/1363/2303/2627/2702/9464/3776/8828/5125/57167/6423/7042/7168/7472<br>/23414                 | 1<br>6 |
| B<br>P | G<br>O:<br>00<br>48<br>56<br>5 | digestive tract<br>development                                                                     | 14<br>/4<br>08 | 13<br>2/<br>17<br>91<br>3 | 1.9<br>3E<br>-0<br>6 | 5.3<br>2E<br>-0<br>5 | 3.8<br>9E<br>-0<br>5 | 79827/1281/51339/2627/2736/2737/5125/56034/5156/91461/5919/6423/7042/7043                              | 1<br>4 |
| B<br>P | G<br>O:<br>00<br>01<br>76<br>3 | morphogenesis of a<br>branching structure                                                          | 17<br>/4<br>08 | 19<br>2/<br>17<br>91<br>3 | 2.0<br>0E<br>-0<br>6 | 5.4<br>6E<br>-0<br>5 | 3.9<br>9E<br>-0<br>5 | 170690/6356/1909/2138/2260/2303/2736/2737/26585/3082/255743/6423/6591/23213/<br>3371/7472/7490         | 1<br>7 |
| B<br>P | G<br>O:<br>00<br>30<br>16<br>8 | platelet activation                                                                                | 15<br>/4<br>08 | 15<br>2/<br>17<br>91<br>3 | 2.0<br>8E<br>-0<br>6 | 5.6<br>6E<br>-0<br>5 | 4.1<br>3E<br>-0<br>5 | 170692/114897/1277/1278/1281/1311/2151/2316/2621/3690/10398/5156/10630/5592/<br>5270                   | 1<br>5 |
| B<br>P | G<br>O:<br>00<br>90<br>09<br>2 | regulation of<br>transmembrane<br>receptor protein<br>serine/threonine kinase<br>signaling pathway | 18<br>/4<br>08 | 21<br>5/<br>17<br>91<br>3 | 2.2<br>4E<br>-0<br>6 | 6.0<br>5E<br>-0<br>5 | 4.4<br>2E<br>-0<br>5 | 54829/857/8483/111117/2200/26585/5654/94031/3624/4015/255743/56937/6423/6424/<br>23213/7043/7057/23090 | 1<br>8 |
| B<br>P | G<br>O:<br>00<br>07<br>56<br>6 | embryo implantation                                                                                | 9/<br>40<br>8  | 52<br>/1<br>79<br>13      | 2.3<br>4E<br>-0<br>6 | 6.2<br>5E<br>-0<br>5 | 4.5<br>7E<br>-0<br>5 | 3490/3976/4313/5125/5740/5743/6781/7076/7216                                                           | 9      |
| B<br>P | G<br>O:<br>00                  | cardiocyte<br>differentiation                                                                      | 15<br>/4<br>08 | 15<br>4/<br>17            | 2.4<br>6E<br>-0      | 6.5<br>3E<br>-0      | 4.7<br>7E<br>-0      | 88/80206/2627/26585/9464/50507/5156/5159/144165/5999/6444/26011/7042/7291/74<br>90                     | 1<br>5 |

|        |                                |                                                          |                |                           |                      |                      |                      |                                                                                                                                           |        |
|--------|--------------------------------|----------------------------------------------------------|----------------|---------------------------|----------------------|----------------------|----------------------|-------------------------------------------------------------------------------------------------------------------------------------------|--------|
|        | 35<br>05<br>1                  |                                                          |                | 91<br>3                   | 6                    | 5                    | 5                    |                                                                                                                                           |        |
| B<br>P | G<br>O:<br>00<br>48<br>70<br>6 | embryonic skeletal<br>system development                 | 13<br>/4<br>08 | 11<br>7/<br>17<br>91<br>3 | 2.6<br>6E<br>-0<br>6 | 7.0<br>3E<br>-0<br>5 | 5.1<br>3E<br>-0<br>5 | 1301/1277/2138/2303/2737/5125/5156/5396/23213/55959/7043/7291/64131                                                                       | 1<br>3 |
| B<br>P | G<br>O:<br>00<br>32<br>33<br>1 | negative regulation of<br>chondrocyte<br>differentiation | 6/<br>40<br>8  | 19<br>/1<br>79<br>13      | 2.8<br>4E<br>-0<br>6 | 7.4<br>4E<br>-0<br>5 | 5.4<br>4E<br>-0<br>5 | 81792/2202/2736/26585/5744/6591                                                                                                           | 6      |
| B<br>P | G<br>O:<br>00<br>48<br>56<br>8 | embryonic organ<br>development                           | 26<br>/4<br>08 | 41<br>3/<br>17<br>91<br>3 | 3.2<br>0E<br>-0<br>6 | 8.3<br>2E<br>-0<br>5 | 6.0<br>8E<br>-0<br>5 | 220/1301/115908/2202/2138/2200/2260/2303/2702/2736/2737/9464/3976/4237/5125/<br>56034/5156/91461/5396/5919/4920/7042/7043/7291/7472/23414 | 2<br>6 |
| B<br>P | G<br>O:<br>00<br>33<br>00<br>2 | muscle cell proliferation                                | 19<br>/4<br>08 | 24<br>3/<br>17<br>91<br>3 | 3.2<br>5E<br>-0<br>6 | 8.3<br>9E<br>-0<br>5 | 6.1<br>3E<br>-0<br>5 | 9370/1012/2260/2303/2627/3488/3776/4313/4883/5159/5592/5743/26011/7042/7043/<br>7057/7168/7472/23414                                      | 1<br>9 |
| B<br>P | G<br>O:<br>00<br>90<br>13<br>0 | tissue migration                                         | 24<br>/4<br>08 | 36<br>3/<br>17<br>91<br>3 | 3.3<br>3E<br>-0<br>6 | 8.5<br>3E<br>-0<br>5 | 6.2<br>3E<br>-0<br>5 | 59/1012/1545/1634/2191/2260/2303/26585/3037/3690/57608/4017/4223/8828/10769/<br>5587/5743/7857/5176/6678/27286/6781/7042/7057             | 2<br>4 |
| B<br>P | G<br>O:<br>19<br>03<br>05<br>3 | regulation of<br>extracellular matrix<br>organization    | 8/<br>40<br>8  | 41<br>/1<br>79<br>13      | 3.3<br>4E<br>-0<br>6 | 8.5<br>3E<br>-0<br>5 | 6.2<br>3E<br>-0<br>5 | 165/84168/4921/11117/2191/3037/10630/90102                                                                                                | 8      |

|        |                                |                                                |                |                           |                      |                             |                      |                                                                                                                                 |        |
|--------|--------------------------------|------------------------------------------------|----------------|---------------------------|----------------------|-----------------------------|----------------------|---------------------------------------------------------------------------------------------------------------------------------|--------|
| B<br>P | G<br>O:<br>00<br>30<br>11<br>1 | regulation of Wnt<br>signaling pathway         | 23<br>/4<br>08 | 34<br>/1<br>17<br>91<br>3 | 3.8<br>3E<br>-0<br>6 | 9.7<br>0E<br>-0<br>5        | 7.0<br>9E<br>-0<br>5 | 8313/80114/857/1000/1277/115908/51339/2737/26585/23072/3489/85409/144165/27303/4920/6423/6424/6591/23213/55959/9096/83439/63923 | 2<br>3 |
| B<br>P | G<br>O:<br>00<br>14<br>81<br>2 | muscle cell migration                          | 12<br>/4<br>08 | 10<br>/3<br>17<br>91<br>3 | 3.9<br>2E<br>-0<br>6 | 9.8<br>5E<br>-0<br>5        | 7.2<br>0E<br>-0<br>5 | 9370/3037/3488/3690/50507/5159/5328/10631/5592/5054/7060/7168                                                                   | 1<br>2 |
| B<br>P | G<br>O:<br>00<br>44<br>70<br>6 | multi-multicellular<br>organism process        | 18<br>/4<br>08 | 22<br>/5<br>17<br>91<br>3 | 4.2<br>7E<br>-0<br>6 | 0.0<br>00<br>10<br>67<br>49 | 7.8<br>0E<br>-0<br>5 | 552/1307/10699/1833/3488/3490/3678/3976/4313/5125/5740/5743/5744/5270/6781/7043/7076/7216                                       | 1<br>8 |
| B<br>P | G<br>O:<br>19<br>03<br>03<br>5 | negative regulation of<br>response to wounding | 11<br>/4<br>08 | 87<br>/1<br>79<br>13      | 4.4<br>3E<br>-0<br>6 | 0.0<br>00<br>11<br>01<br>09 | 8.0<br>4E<br>-0<br>5 | 170692/114897/2191/5156/90102/5328/5592/5627/5054/5270/7057                                                                     | 1<br>1 |
| B<br>P | G<br>O:<br>00<br>10<br>47<br>0 | regulation of<br>gastrulation                  | 8/<br>40<br>8  | 43<br>/1<br>79<br>13      | 4.8<br>8E<br>-0<br>6 | 0.0<br>00<br>12<br>03<br>58 | 8.7<br>9E<br>-0<br>5 | 9370/1289/1290/2260/91663/90102/6423/26011                                                                                      | 8      |
| B<br>P | G<br>O:<br>00<br>55<br>12<br>3 | digestive system<br>development                | 14<br>/4<br>08 | 14<br>/3<br>17<br>91<br>3 | 5.0<br>0E<br>-0<br>6 | 0.0<br>00<br>12<br>17<br>51 | 8.8<br>9E<br>-0<br>5 | 79827/1281/51339/2627/2736/2737/5125/56034/5156/91461/5919/6423/7042/7043                                                       | 1<br>4 |
| B<br>P | G<br>O:<br>00                  | regulation of wound<br>healing                 | 14<br>/4<br>08 | 14<br>/3<br>17            | 5.0<br>0E<br>-0      | 0.0<br>00<br>12             | 8.8<br>9E<br>-0      | 170692/114897/857/2191/2303/5156/10630/90102/5328/5592/5627/5054/5270/7057                                                      | 1<br>4 |

|        |                                |                                   |                |                           |                      |                             |                             |                                                                                                      |        |
|--------|--------------------------------|-----------------------------------|----------------|---------------------------|----------------------|-----------------------------|-----------------------------|------------------------------------------------------------------------------------------------------|--------|
|        | 61<br>04<br>1                  |                                   |                | 91<br>3                   | 6                    | 17<br>51                    | 5                           |                                                                                                      |        |
| B<br>P | G<br>O:<br>00<br>60<br>32<br>6 | cell chemotaxis                   | 19<br>/4<br>08 | 25<br>3/<br>17<br>91<br>3 | 5.8<br>4E<br>-0<br>6 | 0.0<br>00<br>14<br>13<br>48 | 0.0<br>00<br>10<br>32<br>65 | 185/6356/6387/1588/9420/2260/2621/26585/3082/4015/5156/5159/5587/5919/7857/5054/7042/7057/7060       | 1<br>9 |
| B<br>P | G<br>O:<br>00<br>48<br>59<br>2 | eye morphogenesis                 | 14<br>/4<br>08 | 14<br>5/<br>17<br>91<br>3 | 5.8<br>8E<br>-0<br>6 | 0.0<br>00<br>14<br>14<br>26 | 0.0<br>00<br>10<br>33<br>21 | 220/1289/1290/1295/1296/2202/2200/2737/4237/4915/55714/7070/7291/7472                                | 1<br>4 |
| B<br>P | G<br>O:<br>00<br>34<br>33<br>0 | cell junction organization        | 20<br>/4<br>08 | 27<br>7/<br>17<br>91<br>3 | 6.0<br>2E<br>-0<br>6 | 0.0<br>00<br>14<br>37<br>33 | 0.0<br>00<br>10<br>50<br>07 | 88/857/1009/1012/1000/1307/2042/10979/2316/2335/2702/26585/3678/90102/11228/6591/7042/7043/7057/7070 | 2<br>0 |
| B<br>P | G<br>O:<br>00<br>60<br>34<br>9 | bone morphogenesis                | 11<br>/4<br>08 | 90<br>/1<br>79<br>13      | 6.2<br>0E<br>-0<br>6 | 0.0<br>00<br>14<br>71<br>11 | 0.0<br>00<br>10<br>74<br>74 | 8313/658/1277/1311/2737/3037/6423/6424/6781/7043/7291                                                | 1<br>1 |
| B<br>P | G<br>O:<br>00<br>71<br>77<br>2 | response to BMP                   | 14<br>/4<br>08 | 14<br>7/<br>17<br>91<br>3 | 6.9<br>0E<br>-0<br>6 | 0.0<br>00<br>15<br>89<br>68 | 0.0<br>00<br>11<br>61<br>37 | 81792/658/1311/2200/11167/2627/26585/5654/94031/4920/6423/6424/23213/23090                           | 1<br>4 |
| B<br>P | G<br>O:<br>00<br>71<br>77<br>3 | cellular response to BMP stimulus | 14<br>/4<br>08 | 14<br>7/<br>17<br>91<br>3 | 6.9<br>0E<br>-0<br>6 | 0.0<br>00<br>15<br>89<br>68 | 0.0<br>00<br>11<br>61<br>37 | 81792/658/1311/2200/11167/2627/26585/5654/94031/4920/6423/6424/23213/23090                           | 1<br>4 |

|        |                                |                                                          |                |                           |                      |                             |                             |                                                                                                                        |        |
|--------|--------------------------------|----------------------------------------------------------|----------------|---------------------------|----------------------|-----------------------------|-----------------------------|------------------------------------------------------------------------------------------------------------------------|--------|
| B<br>P | G<br>O:<br>00<br>01<br>65<br>6 | metanephros<br>development                               | 11<br>/4<br>08 | 91<br>/1<br>79<br>13      | 6.9<br>1E<br>-0<br>6 | 0.0<br>00<br>15<br>89<br>68 | 0.0<br>00<br>11<br>61<br>37 | 9370/2138/2200/2303/2737/26585/55083/3976/5156/5159/7490                                                               | 1<br>1 |
| B<br>P | G<br>O:<br>00<br>10<br>71<br>7 | regulation of epithelial<br>to mesenchymal<br>transition | 11<br>/4<br>08 | 91<br>/1<br>79<br>13      | 6.9<br>1E<br>-0<br>6 | 0.0<br>00<br>15<br>89<br>68 | 0.0<br>00<br>11<br>61<br>37 | 8313/1277/2042/26585/4017/10630/90102/6423/7042/7043/7291                                                              | 1<br>1 |
| B<br>P | G<br>O:<br>00<br>14<br>90<br>9 | smooth muscle cell<br>migration                          | 11<br>/4<br>08 | 91<br>/1<br>79<br>13      | 6.9<br>1E<br>-0<br>6 | 0.0<br>00<br>15<br>89<br>68 | 0.0<br>00<br>11<br>61<br>37 | 9370/3037/3488/3690/50507/5159/5328/10631/5592/5054/7168                                                               | 1<br>1 |
| B<br>P | G<br>O:<br>00<br>10<br>63<br>1 | epithelial cell migration                                | 23<br>/4<br>08 | 35<br>4/<br>17<br>91<br>3 | 7.1<br>0E<br>-0<br>6 | 0.0<br>00<br>16<br>25<br>52 | 0.0<br>00<br>11<br>87<br>55 | 1012/1545/1634/2191/2260/2303/26585/3037/3690/57608/4017/4223/8828/10769/5587/5743/7857/5176/6678/27286/6781/7042/7057 | 2<br>3 |
| B<br>P | G<br>O:<br>00<br>10<br>81<br>1 | positive regulation of<br>cell-substrate adhesion        | 12<br>/4<br>08 | 11<br>0/<br>17<br>91<br>3 | 7.8<br>0E<br>-0<br>6 | 0.0<br>00<br>17<br>74<br>77 | 0.0<br>00<br>12<br>96<br>59 | 151887/1012/1307/1295/10085/2316/2335/3037/3678/91663/255743/7070                                                      | 1<br>2 |
| B<br>P | G<br>O:<br>00<br>90<br>13<br>2 | epithelium migration                                     | 23<br>/4<br>08 | 35<br>7/<br>17<br>91<br>3 | 8.1<br>5E<br>-0<br>6 | 0.0<br>00<br>18<br>43<br>31 | 0.0<br>00<br>13<br>46<br>67 | 1012/1545/1634/2191/2260/2303/26585/3037/3690/57608/4017/4223/8828/10769/5587/5743/7857/5176/6678/27286/6781/7042/7057 | 2<br>3 |
| B<br>P | G<br>O:<br>00                  | female pregnancy                                         | 16<br>/4<br>08 | 19<br>3/<br>17            | 9.2<br>8E<br>-0      | 0.0<br>00<br>20             | 0.0<br>00<br>15             | 1307/10699/1833/3488/3490/3678/3976/4313/5125/5740/5743/5744/6781/7043/7076/7216                                       | 1<br>6 |

|        |                                |                                       |                |                           |                      |                             |                             |                                                                                                                                                   |        |
|--------|--------------------------------|---------------------------------------|----------------|---------------------------|----------------------|-----------------------------|-----------------------------|---------------------------------------------------------------------------------------------------------------------------------------------------|--------|
|        | 07<br>56<br>5                  |                                       |                | 91<br>3                   | 6                    | 84<br>64                    | 22<br>97                    |                                                                                                                                                   |        |
| B<br>P | G<br>O:<br>00<br>48<br>56<br>6 | embryonic digestive tract development | 7/<br>40<br>8  | 34<br>/1<br>79<br>13      | 9.5<br>5E<br>-0<br>6 | 0.0<br>00<br>21<br>33<br>29 | 0.0<br>00<br>15<br>58<br>52 | 2736/2737/5125/5156/91461/5919/7042                                                                                                               | 7      |
| B<br>P | G<br>O:<br>00<br>03<br>41<br>6 | endochondral bone growth              | 6/<br>40<br>8  | 23<br>/1<br>79<br>13      | 9.7<br>8E<br>-0<br>6 | 0.0<br>00<br>21<br>71<br>77 | 0.0<br>00<br>15<br>86<br>62 | 54796/1311/4921/1893/2121/6781                                                                                                                    | 6      |
| B<br>P | G<br>O:<br>00<br>01<br>76<br>4 | neuron migration                      | 14<br>/4<br>08 | 15<br>2/<br>17<br>91<br>3 | 1.0<br>2E<br>-0<br>5 | 0.0<br>00<br>22<br>43<br>16 | 0.0<br>00<br>16<br>38<br>78 | 558/1281/6387/2260/2316/23768/2621/4131/8828/4915/5592/6695/63923/7291                                                                            | 1<br>4 |
| B<br>P | G<br>O:<br>00<br>60<br>56<br>2 | epithelial tube morphogenesis         | 21<br>/4<br>08 | 31<br>3/<br>17<br>91<br>3 | 1.1<br>0E<br>-0<br>5 | 0.0<br>00<br>24<br>03<br>34 | 0.0<br>00<br>17<br>55<br>8  | 81792/170690/6356/115908/1909/2138/2303/2736/2737/26585/9464/55083/255743/144165/57167/6423/7042/3371/7291/7472/7490                              | 2<br>1 |
| B<br>P | G<br>O:<br>00<br>50<br>87<br>8 | regulation of body fluid levels       | 28<br>/4<br>08 | 49<br>9/<br>17<br>91<br>3 | 1.1<br>8E<br>-0<br>5 | 0.0<br>00<br>25<br>80<br>94 | 0.0<br>00<br>18<br>85<br>55 | 170692/114897/857/1277/1278/1281/1311/2162/2151/2191/2316/2621/2627/2702/3037/3690/10398/4883/9060/5156/10630/5328/5592/5627/5054/5270/7057/23414 | 2<br>8 |
| B<br>P | G<br>O:<br>00<br>03<br>15<br>1 | outflow tract morphogenesis           | 10<br>/4<br>08 | 80<br>/1<br>79<br>13      | 1.3<br>4E<br>-0<br>5 | 0.0<br>00<br>29<br>03<br>12 | 0.0<br>00<br>21<br>20<br>93 | 2138/2303/2627/2702/9464/8828/6423/7042/7291/23414                                                                                                | 1<br>0 |

|        |                                |                                                                |                |                           |                      |                             |                             |                                                                                                 |        |
|--------|--------------------------------|----------------------------------------------------------------|----------------|---------------------------|----------------------|-----------------------------|-----------------------------|-------------------------------------------------------------------------------------------------|--------|
| B<br>P | G<br>O:<br>00<br>50<br>73<br>0 | regulation of<br>peptidyl-tyrosine<br>phosphorylation          | 18<br>/4<br>08 | 24<br>5/<br>17<br>91<br>3 | 1.3<br>8E<br>-0<br>5 | 0.0<br>00<br>29<br>85<br>72 | 0.0<br>00<br>21<br>81<br>27 | 9370/857/1272/9244/1464/2621/2690/26585/3082/3678/3690/3976/50507/4915/56034<br>/6423/7060/7070 | 1<br>8 |
| B<br>P | G<br>O:<br>00<br>71<br>63<br>4 | regulation of<br>transforming growth<br>factor beta production | 7/<br>40<br>8  | 36<br>/1<br>79<br>13      | 1.4<br>2E<br>-0<br>5 | 0.0<br>00<br>30<br>38<br>96 | 0.0<br>00<br>22<br>20<br>17 | 4345/2627/2615/4060/5743/7042/7057                                                              | 7      |
| B<br>P | G<br>O:<br>00<br>98<br>80<br>1 | regulation of renal<br>system process                          | 7/<br>40<br>8  | 36<br>/1<br>79<br>13      | 1.4<br>2E<br>-0<br>5 | 0.0<br>00<br>30<br>38<br>96 | 0.0<br>00<br>22<br>20<br>17 | 9370/185/552/10699/2621/2702/6781                                                               | 7      |
| B<br>P | G<br>O:<br>00<br>34<br>11<br>0 | regulation of homotypic<br>cell-cell adhesion                  | 6/<br>40<br>8  | 25<br>/1<br>79<br>13      | 1.6<br>5E<br>-0<br>5 | 0.0<br>00<br>35<br>01<br>08 | 0.0<br>00<br>25<br>57<br>78 | 170692/114897/3956/10630/5592/5270                                                              | 6      |
| B<br>P | G<br>O:<br>00<br>03<br>07<br>3 | regulation of systemic<br>arterial blood pressure              | 10<br>/4<br>08 | 83<br>/1<br>79<br>13      | 1.8<br>6E<br>-0<br>5 | 0.0<br>00<br>39<br>23<br>67 | 0.0<br>00<br>28<br>66<br>51 | 170690/185/552/1066/10699/2621/2702/5125/10631/7168                                             | 1<br>0 |
| B<br>P | G<br>O:<br>00<br>03<br>01<br>4 | renal system process                                           | 12<br>/4<br>08 | 12<br>0/<br>17<br>91<br>3 | 1.9<br>1E<br>-0<br>5 | 0.0<br>00<br>39<br>99<br>23 | 0.0<br>00<br>29<br>21<br>71 | 9370/185/552/10699/2621/2702/3037/4883/5125/6781/23213/55959                                    | 1<br>2 |
| B<br>P | G<br>O:<br>00                  | positive regulation of<br>osteoblast<br>differentiation        | 9/<br>40<br>8  | 67<br>/1<br>79            | 2.0<br>1E<br>-0      | 0.0<br>00<br>41             | 0.0<br>00<br>30             | 658/115908/4921/56975/2737/3082/255743/5587/6423                                                | 9      |

|        |                                |                                               |                |                           |                      |                             |                             |                                                                             |        |
|--------|--------------------------------|-----------------------------------------------|----------------|---------------------------|----------------------|-----------------------------|-----------------------------|-----------------------------------------------------------------------------|--------|
|        | 45<br>66<br>9                  |                                               |                | 13                        | 5                    | 88<br>9                     | 60<br>28                    |                                                                             |        |
| B<br>P | G<br>O:<br>00<br>71<br>60<br>4 | transforming growth<br>factor beta production | 7/<br>40<br>8  | 38<br>/1<br>79<br>13      | 2.0<br>7E<br>-0<br>5 | 0.0<br>00<br>42<br>96<br>21 | 0.0<br>00<br>31<br>38<br>68 | 4345/2627/2615/4060/5743/7042/7057                                          | 7      |
| B<br>P | G<br>O:<br>00<br>30<br>20<br>6 | chondroitin sulfate<br>biosynthetic process   | 6/<br>40<br>8  | 26<br>/1<br>79<br>13      | 2.1<br>1E<br>-0<br>5 | 0.0<br>00<br>43<br>42<br>47 | 0.0<br>00<br>31<br>72<br>47 | 633/1464/1634/29940/1462/64131                                              | 6      |
| B<br>P | G<br>O:<br>00<br>42<br>69<br>8 | ovulation cycle                               | 9/<br>40<br>8  | 68<br>/1<br>79<br>13      | 2.2<br>7E<br>-0<br>5 | 0.0<br>00<br>46<br>29<br>74 | 0.0<br>00<br>33<br>82<br>34 | 558/658/3037/3624/4327/5156/5176/7042/7043                                  | 9      |
| B<br>P | G<br>O:<br>00<br>86<br>00<br>3 | cardiac muscle cell<br>contraction            | 9/<br>40<br>8  | 68<br>/1<br>79<br>13      | 2.2<br>7E<br>-0<br>5 | 0.0<br>00<br>46<br>29<br>74 | 0.0<br>00<br>33<br>82<br>34 | 781/857/2316/2702/23704/3764/6330/6444/6781                                 | 9      |
| B<br>P | G<br>O:<br>00<br>48<br>83<br>9 | inner ear development                         | 15<br>/4<br>08 | 18<br>5/<br>17<br>91<br>3 | 2.2<br>9E<br>-0<br>5 | 0.0<br>00<br>46<br>40<br>47 | 0.0<br>00<br>33<br>90<br>18 | 220/1301/115908/2138/2260/2736/2737/3776/5159/5396/4919/4920/6678/7042/7043 | 1<br>5 |
| B<br>P | G<br>O:<br>00<br>14<br>91<br>0 | regulation of smooth<br>muscle cell migration | 10<br>/4<br>08 | 85<br>/1<br>79<br>13      | 2.3<br>0E<br>-0<br>5 | 0.0<br>00<br>46<br>40<br>47 | 0.0<br>00<br>33<br>90<br>18 | 9370/3037/3488/50507/5159/5328/10631/5592/5054/7168                         | 1<br>0 |



|        |                                |                                                   |                |                           |                      |                             |                             |                                                                              |        |
|--------|--------------------------------|---------------------------------------------------|----------------|---------------------------|----------------------|-----------------------------|-----------------------------|------------------------------------------------------------------------------|--------|
| B<br>P | G<br>O:<br>00<br>50<br>92<br>0 | regulation of<br>chemotaxis                       | 15<br>/4<br>08 | 18<br>6/<br>17<br>91<br>3 | 2.4<br>4E<br>-0<br>5 | 0.0<br>00<br>48<br>11<br>19 | 0.0<br>00<br>35<br>14<br>9  | 1012/6387/1588/2260/2621/26585/5156/5159/91584/5587/5919/7857/5054/7057/7060 | 1<br>5 |
| B<br>P | G<br>O:<br>00<br>30<br>16<br>6 | proteoglycan<br>biosynthetic process              | 8/<br>40<br>8  | 53<br>/1<br>79<br>13      | 2.4<br>4E<br>-0<br>5 | 0.0<br>00<br>48<br>11<br>19 | 0.0<br>00<br>35<br>14<br>9  | 633/658/1464/1634/29940/92126/1462/64131                                     | 8      |
| B<br>P | G<br>O:<br>00<br>32<br>96<br>4 | collagen biosynthetic<br>process                  | 8/<br>40<br>8  | 53<br>/1<br>79<br>13      | 2.4<br>4E<br>-0<br>5 | 0.0<br>00<br>48<br>11<br>19 | 0.0<br>00<br>35<br>14<br>9  | 1277/1289/90993/11117/10536/5159/7043/7431                                   | 8      |
| B<br>P | G<br>O:<br>00<br>30<br>32<br>6 | embryonic limb<br>morphogenesis                   | 12<br>/4<br>08 | 12<br>3/<br>17<br>91<br>3 | 2.4<br>5E<br>-0<br>5 | 0.0<br>00<br>48<br>11<br>19 | 0.0<br>00<br>35<br>14<br>9  | 2260/2702/2736/2737/26585/9464/5396/4920/57167/6423/7042/7291                | 1<br>2 |
| B<br>P | G<br>O:<br>00<br>35<br>11<br>3 | embryonic appendage<br>morphogenesis              | 12<br>/4<br>08 | 12<br>3/<br>17<br>91<br>3 | 2.4<br>5E<br>-0<br>5 | 0.0<br>00<br>48<br>11<br>19 | 0.0<br>00<br>35<br>14<br>9  | 2260/2702/2736/2737/26585/9464/5396/4920/57167/6423/7042/7291                | 1<br>2 |
| B<br>P | G<br>O:<br>00<br>30<br>20<br>4 | chondroitin sulfate<br>metabolic process          | 7/<br>40<br>8  | 39<br>/1<br>79<br>13      | 2.4<br>8E<br>-0<br>5 | 0.0<br>00<br>48<br>41<br>69 | 0.0<br>00<br>35<br>37<br>18 | 633/1464/1634/29940/92126/1462/64131                                         | 7      |
| B<br>P | G<br>O:<br>00                  | substrate<br>adhesion-dependent<br>cell spreading | 10<br>/4<br>08 | 86<br>/1<br>79            | 2.5<br>5E<br>-0      | 0.0<br>00<br>49             | 0.0<br>00<br>36             | 84168/558/10979/2316/2335/3037/3690/91663/10630/10631                        | 1<br>0 |

|        |                                |                                                           |                |                           |                      |                                   |                             |                                                                                                                               |        |
|--------|--------------------------------|-----------------------------------------------------------|----------------|---------------------------|----------------------|-----------------------------------|-----------------------------|-------------------------------------------------------------------------------------------------------------------------------|--------|
|        | 34<br>44<br>6                  |                                                           |                | 13                        | 5                    | 60<br>39                          | 23<br>9                     |                                                                                                                               |        |
| B<br>P | G<br>O:<br>00<br>06<br>93<br>9 | smooth muscle<br>contraction                              | 11<br>/4<br>08 | 10<br>5/<br>17<br>91<br>3 | 2.7<br>4E<br>-0<br>5 | 0.0<br>00<br>52<br>94<br>79       | 0.0<br>00<br>38<br>68<br>21 | 59/857/1311/1909/2982/3357/255743/5592/5743/23213/55959                                                                       | 1<br>1 |
| B<br>P | G<br>O:<br>00<br>61<br>00<br>5 | cell differentiation<br>involved in kidney<br>development | 8/<br>40<br>8  | 54<br>/1<br>79<br>13      | 2.8<br>1E<br>-0<br>5 | 0.0<br>00<br>54<br>17<br>28       | 0.0<br>00<br>39<br>57<br>69 | 59/9370/2303/2737/84662/26585/3976/7490                                                                                       | 8      |
| B<br>P | G<br>O:<br>00<br>43<br>58<br>3 | ear development                                           | 16<br>/4<br>08 | 21<br>2/<br>17<br>91<br>3 | 2.9<br>8E<br>-0<br>5 | 0.0<br>00<br>00<br>57<br>17<br>86 | 0.0<br>00<br>41<br>77<br>29 | 220/1301/115908/2138/2260/2736/2737/3776/5159/5396/4919/4920/6678/7042/7043/<br>7291                                          | 1<br>6 |
| B<br>P | G<br>O:<br>00<br>48<br>75<br>4 | branching<br>morphogenesis of an<br>epithelial tube       | 13<br>/4<br>08 | 14<br>6/<br>17<br>91<br>3 | 3.0<br>1E<br>-0<br>5 | 0.0<br>00<br>57<br>36<br>68       | 0.0<br>00<br>41<br>91<br>03 | 170690/6356/1909/2138/2303/2736/2737/26585/255743/6423/3371/7472/7490                                                         | 1<br>3 |
| B<br>P | G<br>O:<br>00<br>45<br>78<br>5 | positive regulation of<br>cell adhesion                   | 23<br>/4<br>08 | 38<br>8/<br>17<br>91<br>3 | 3.0<br>8E<br>-0<br>5 | 0.0<br>00<br>58<br>35<br>72       | 0.0<br>00<br>42<br>63<br>39 | 857/151887/1012/1307/1295/6387/10085/2316/2335/2303/2736/2737/3037/3678/5508<br>3/3956/91663/255743/10630/6423/7042/7070/7168 | 2<br>3 |
| B<br>P | G<br>O:<br>00<br>44<br>27<br>2 | sulfur compound<br>biosynthetic process                   | 15<br>/4<br>08 | 19<br>0/<br>17<br>91<br>3 | 3.1<br>3E<br>-0<br>5 | 0.0<br>00<br>59<br>05<br>89       | 0.0<br>00<br>43<br>14<br>66 | 633/23743/4166/1464/1634/29940/92126/2331/2687/4060/4958/9060/5549/1462/6413<br>1                                             | 1<br>5 |

|        |                                |                                                          |                |                           |                      |                             |                             |                                                                                                                         |        |
|--------|--------------------------------|----------------------------------------------------------|----------------|---------------------------|----------------------|-----------------------------|-----------------------------|-------------------------------------------------------------------------------------------------------------------------|--------|
| B<br>P | G<br>O:<br>00<br>85<br>02<br>9 | extracellular matrix<br>assembly                         | 6/<br>40<br>8  | 28<br>/1<br>79<br>13      | 3.3<br>1E<br>-0<br>5 | 0.0<br>00<br>62<br>24<br>81 | 0.0<br>00<br>45<br>47<br>65 | 84168/1278/11117/2621/3037/4015                                                                                         | 6      |
| B<br>P | G<br>O:<br>00<br>72<br>21<br>0 | metanephric nephron<br>development                       | 7/<br>40<br>8  | 41<br>/1<br>79<br>13      | 3.4<br>8E<br>-0<br>5 | 0.0<br>00<br>65<br>01<br>69 | 0.0<br>00<br>47<br>49<br>93 | 9370/26585/55083/3976/5156/5159/7490                                                                                    | 7      |
| B<br>P | G<br>O:<br>00<br>03<br>20<br>6 | cardiac chamber<br>morphogenesis                         | 12<br>/4<br>08 | 12<br>9/<br>17<br>91<br>3 | 3.9<br>4E<br>-0<br>5 | 0.0<br>00<br>73<br>22<br>22 | 0.0<br>00<br>53<br>49<br>38 | 1301/1363/2303/2627/2702/9464/8828/6423/7042/7168/7472/23414                                                            | 1<br>2 |
| B<br>P | G<br>O:<br>00<br>90<br>33<br>0 | regulation of platelet<br>aggregation                    | 5/<br>40<br>8  | 18<br>/1<br>79<br>13      | 4.0<br>1E<br>-0<br>5 | 0.0<br>00<br>74<br>23<br>85 | 0.0<br>00<br>54<br>23<br>63 | 170692/114897/10630/5592/5270                                                                                           | 5      |
| B<br>P | G<br>O:<br>00<br>48<br>73<br>2 | gland development                                        | 24<br>/4<br>08 | 42<br>2/<br>17<br>91<br>3 | 4.0<br>3E<br>-0<br>5 | 0.0<br>00<br>74<br>25<br>37 | 0.0<br>00<br>54<br>24<br>74 | 220/857/6356/1588/9420/2260/2627/2736/2737/9464/3082/3488/8660/5156/5270/5176/6591/23213/55959/7042/7043/3371/7472/7490 | 2<br>4 |
| B<br>P | G<br>O:<br>00<br>10<br>86<br>3 | positive regulation of<br>phospholipase C<br>activity    | 7/<br>40<br>8  | 42<br>/1<br>79<br>13      | 4.0<br>9E<br>-0<br>5 | 0.0<br>00<br>74<br>39<br>81 | 0.0<br>00<br>54<br>35<br>29 | 552/1909/2260/3357/4915/5156/5159                                                                                       | 7      |
| B<br>P | G<br>O:<br>00                  | chondroitin sulfate<br>proteoglycan metabolic<br>process | 7/<br>40<br>8  | 42<br>/1<br>79            | 4.0<br>9E<br>-0      | 0.0<br>00<br>74             | 0.0<br>00<br>54             | 633/1464/1634/29940/92126/1462/64131                                                                                    | 7      |

|        |                                |                                                             |                |                           |                      |                             |                             |                                                                                                                    |        |
|--------|--------------------------------|-------------------------------------------------------------|----------------|---------------------------|----------------------|-----------------------------|-----------------------------|--------------------------------------------------------------------------------------------------------------------|--------|
|        | 50<br>65<br>4                  |                                                             |                | 13                        | 5                    | 39<br>81                    | 35<br>29                    |                                                                                                                    |        |
| B<br>P | G<br>O:<br>00<br>50<br>65<br>0 | chondroitin sulfate<br>proteoglycan<br>biosynthetic process | 6/<br>40<br>8  | 29<br>/1<br>79<br>13      | 4.1<br>0E<br>-0<br>5 | 0.0<br>00<br>74<br>39<br>81 | 0.0<br>00<br>54<br>35<br>29 | 633/1464/1634/29940/1462/64131                                                                                     | 6      |
| B<br>P | G<br>O:<br>00<br>10<br>51<br>8 | positive regulation of<br>phospholipase activity            | 8/<br>40<br>8  | 57<br>/1<br>79<br>13      | 4.2<br>1E<br>-0<br>5 | 0.0<br>00<br>75<br>65<br>79 | 0.0<br>00<br>55<br>27<br>33 | 185/552/1909/2260/3357/4915/5156/5159                                                                              | 8      |
| B<br>P | G<br>O:<br>00<br>35<br>90<br>4 | aorta development                                           | 8/<br>40<br>8  | 57<br>/1<br>79<br>13      | 4.2<br>1E<br>-0<br>5 | 0.0<br>00<br>75<br>65<br>79 | 0.0<br>00<br>55<br>27<br>33 | 11174/1281/2138/4015/4016/5159/144165/7042                                                                         | 8      |
| B<br>P | G<br>O:<br>00<br>32<br>10<br>2 | negative regulation of<br>response to external<br>stimulus  | 21<br>/4<br>08 | 34<br>3/<br>17<br>91<br>3 | 4.2<br>6E<br>-0<br>5 | 0.0<br>00<br>76<br>23<br>69 | 0.0<br>00<br>55<br>69<br>62 | 170692/9370/114897/4345/1588/2191/26585/3082/5654/5156/90102/5328/5592/5627/<br>5740/5054/5270/5176/6591/7057/7130 | 2<br>1 |
| B<br>P | G<br>O:<br>19<br>03<br>03<br>4 | regulation of response<br>to wounding                       | 14<br>/4<br>08 | 17<br>3/<br>17<br>91<br>3 | 4.3<br>6E<br>-0<br>5 | 0.0<br>00<br>77<br>66<br>35 | 0.0<br>00<br>56<br>73<br>85 | 170692/114897/857/2191/2303/5156/10630/90102/5328/5592/5627/5054/5270/7057                                         | 1<br>4 |
| B<br>P | G<br>O:<br>00<br>10<br>54<br>3 | regulation of platelet<br>activation                        | 6/<br>40<br>8  | 30<br>/1<br>79<br>13      | 5.0<br>3E<br>-0<br>5 | 0.0<br>00<br>88<br>66<br>6  | 0.0<br>00<br>64<br>77<br>65 | 170692/114897/5156/10630/5592/5270                                                                                 | 6      |

|        |                                |                                             |                |                           |                      |                             |                             |                                                                                                                                   |        |
|--------|--------------------------------|---------------------------------------------|----------------|---------------------------|----------------------|-----------------------------|-----------------------------|-----------------------------------------------------------------------------------------------------------------------------------|--------|
| B<br>P | G<br>O:<br>00<br>60<br>32<br>5 | face morphogenesis                          | 6/<br>40<br>8  | 30<br>/1<br>79<br>13      | 5.0<br>3E<br>-0<br>5 | 0.0<br>00<br>88<br>66<br>6  | 0.0<br>00<br>64<br>77<br>65 | 1277/83690/83716/4313/5156/7043                                                                                                   | 6      |
| B<br>P | G<br>O:<br>00<br>71<br>22<br>9 | cellular response to acid chemical          | 15<br>/4<br>08 | 19<br>9/<br>17<br>91<br>3 | 5.3<br>4E<br>-0<br>5 | 0.0<br>00<br>93<br>38<br>23 | 0.0<br>00<br>68<br>22<br>21 | 552/1307/1277/1278/1281/1290/1291/2042/4313/4915/56034/5156/5176/3371/7472                                                        | 1<br>5 |
| B<br>P | G<br>O:<br>00<br>10<br>54<br>4 | negative regulation of platelet activation  | 5/<br>40<br>8  | 19<br>/1<br>79<br>13      | 5.3<br>4E<br>-0<br>5 | 0.0<br>00<br>93<br>38<br>23 | 0.0<br>00<br>68<br>22<br>21 | 170692/114897/5156/5592/5270                                                                                                      | 5      |
| B<br>P | G<br>O:<br>00<br>10<br>97<br>5 | regulation of neuron projection development | 25<br>/4<br>08 | 45<br>8/<br>17<br>91<br>3 | 5.4<br>5E<br>-0<br>5 | 0.0<br>00<br>94<br>88<br>81 | 0.0<br>00<br>69<br>32<br>22 | 1272/6387/1809/2042/2260/2335/3082/3956/4131/4915/10769/91584/5376/5587/5396/5789/6383/5176/6423/6695/11075/55714/7070/7431/22891 | 2<br>5 |
| B<br>P | G<br>O:<br>00<br>10<br>46<br>6 | negative regulation of peptidase activity   | 16<br>/4<br>08 | 22<br>3/<br>17<br>91<br>3 | 5.5<br>0E<br>-0<br>5 | 0.0<br>00<br>95<br>08<br>27 | 0.0<br>00<br>69<br>46<br>44 | 3730/1293/1410/1470/1893/2621/3082/5627/5743/5054/6423/6695/7057/7076/7077/7078                                                   | 1<br>6 |
| B<br>P | G<br>O:<br>00<br>07<br>22<br>9 | integrin-mediated signaling pathway         | 10<br>/4<br>08 | 94<br>/1<br>79<br>13      | 5.5<br>4E<br>-0<br>5 | 0.0<br>00<br>95<br>08<br>27 | 0.0<br>00<br>69<br>46<br>44 | 1307/1281/10979/2316/22801/3678/3690/5587/7070/7076                                                                               | 1<br>0 |
| B<br>P | G<br>O:<br>00                  | artery morphogenesis                        | 9/<br>40<br>8  | 76<br>/1<br>79            | 5.5<br>9E<br>-0      | 0.0<br>00<br>95             | 0.0<br>00<br>69             | 1281/1311/2138/2303/2702/9464/5159/5396/7042                                                                                      | 9      |

|        |                                |                                                                                   |                |                            |                      |                             |                             |                                                                              |        |
|--------|--------------------------------|-----------------------------------------------------------------------------------|----------------|----------------------------|----------------------|-----------------------------|-----------------------------|------------------------------------------------------------------------------|--------|
|        | 48<br>84<br>4                  |                                                                                   |                | 13                         | 5                    | 08<br>27                    | 46<br>44                    |                                                                              |        |
| B<br>P | G<br>O:<br>00<br>30<br>85<br>0 | prostate gland<br>development                                                     | 7/<br>40<br>8  | 44<br>/1<br>79<br>13       | 5.5<br>9E<br>-0<br>5 | 0.0<br>00<br>95<br>08<br>27 | 0.0<br>00<br>69<br>46<br>44 | 1588/9420/2736/2737/5176/23213/3371                                          | 7      |
| B<br>P | G<br>O:<br>19<br>00<br>27<br>4 | regulation of<br>phospholipase C<br>activity                                      | 7/<br>40<br>8  | 44<br>/1<br>79<br>13       | 5.5<br>9E<br>-0<br>5 | 0.0<br>00<br>95<br>08<br>27 | 0.0<br>00<br>69<br>46<br>44 | 552/1909/2260/3357/4915/5156/5159                                            | 7      |
| B<br>P | G<br>O:<br>00<br>09<br>61<br>2 | response to mechanical<br>stimulus                                                | 15/<br>4<br>08 | 20<br>/0/<br>17<br>91<br>3 | 5.6<br>6E<br>-0<br>5 | 0.0<br>00<br>95<br>78<br>48 | 0.0<br>00<br>69<br>97<br>73 | 1301/1277/1281/6387/1634/2115/3776/4131/9379/63895/10631/5743/5270/7057/3371 | 1<br>5 |
| B<br>P | G<br>O:<br>00<br>30<br>50<br>9 | BMP signaling pathway                                                             | 12/<br>4<br>08 | 13<br>/4/<br>17<br>91<br>3 | 5.7<br>3E<br>-0<br>5 | 0.0<br>00<br>96<br>08<br>63 | 0.0<br>00<br>70<br>19<br>76 | 658/1311/2200/11167/26585/5654/94031/4920/6423/6424/23213/23090              | 1<br>2 |
| B<br>P | G<br>O:<br>00<br>34<br>33<br>2 | adherens junction<br>organization                                                 | 12/<br>4<br>08 | 13<br>/4/<br>17<br>91<br>3 | 5.7<br>3E<br>-0<br>5 | 0.0<br>00<br>96<br>08<br>63 | 0.0<br>00<br>70<br>19<br>76 | 88/1009/1012/1000/1307/2042/10979/26585/90102/11228/7057/7070                | 1<br>2 |
| B<br>P | G<br>O:<br>00<br>17<br>01<br>5 | regulation of<br>transforming growth<br>factor beta receptor<br>signaling pathway | 11/<br>4<br>08 | 11<br>/5/<br>17<br>91<br>3 | 6.3<br>8E<br>-0<br>5 | 0.0<br>01<br>06<br>50<br>12 | 0.0<br>00<br>77<br>80<br>64 | 54829/857/11117/2200/5654/94031/4015/255743/56937/7043/7057                  | 1<br>1 |

|        |                                |                                                              |                |                           |                      |                             |                             |                                                                                                                               |        |
|--------|--------------------------------|--------------------------------------------------------------|----------------|---------------------------|----------------------|-----------------------------|-----------------------------|-------------------------------------------------------------------------------------------------------------------------------|--------|
| B<br>P | G<br>O:<br>00<br>33<br>62<br>8 | regulation of cell<br>adhesion mediated by<br>integrin       | 7/<br>40<br>8  | 45<br>/1<br>79<br>13      | 6.4<br>9E<br>-0<br>5 | 0.0<br>01<br>07<br>98<br>32 | 0.0<br>00<br>78<br>88<br>91 | 1545/2303/5328/5054/6423/6591/7042                                                                                            | 7      |
| B<br>P | G<br>O:<br>00<br>07<br>04<br>4 | cell-substrate junction<br>assembly                          | 10<br>/4<br>08 | 96<br>/1<br>79<br>13      | 6.6<br>4E<br>-0<br>5 | 0.0<br>01<br>09<br>88<br>7  | 0.0<br>00<br>80<br>27<br>99 | 88/1307/2042/10979/2335/26585/3678/90102/7057/7070                                                                            | 1<br>0 |
| B<br>P | G<br>O:<br>00<br>14<br>03<br>2 | neural crest cell<br>development                             | 8/<br>40<br>8  | 61<br>/1<br>79<br>13      | 6.9<br>3E<br>-0<br>5 | 0.0<br>01<br>13<br>72<br>24 | 0.0<br>00<br>83<br>08<br>19 | 1909/2335/2303/9464/3357/8828/6591/7291                                                                                       | 8      |
| B<br>P | G<br>O:<br>00<br>32<br>83<br>5 | glomerulus<br>development                                    | 8/<br>40<br>8  | 61<br>/1<br>79<br>13      | 6.9<br>3E<br>-0<br>5 | 0.0<br>01<br>13<br>72<br>24 | 0.0<br>00<br>83<br>08<br>19 | 59/9370/2303/5156/5159/23213/55959/7490                                                                                       | 8      |
| B<br>P | G<br>O:<br>00<br>01<br>10<br>1 | response to acid<br>chemical                                 | 20<br>/4<br>08 | 33<br>0/<br>17<br>91<br>3 | 7.4<br>4E<br>-0<br>5 | 0.0<br>01<br>20<br>95<br>96 | 0.0<br>00<br>88<br>36<br>92 | 9370/552/1307/1277/1278/1281/1290/1291/2042/3490/4313/4915/56034/5156/5159/5743/5176/6678/3371/7472                           | 2<br>0 |
| B<br>P | G<br>O:<br>00<br>50<br>90<br>0 | leukocyte migration                                          | 25<br>/4<br>08 | 46<br>7/<br>17<br>91<br>3 | 7.4<br>5E<br>-0<br>5 | 0.0<br>01<br>20<br>95<br>96 | 0.0<br>00<br>88<br>36<br>92 | 857/6356/4345/1277/1278/6387/1588/9420/1893/11117/2335/2621/26585/3678/3690/5627/5919/4920/7857/6383/5054/7042/7057/7060/7070 | 2<br>5 |
| B<br>P | G<br>O:<br>19                  | regulation of cellular<br>response to<br>transforming growth | 11<br>/4<br>08 | 11<br>7/<br>17            | 7.4<br>7E<br>-0      | 0.0<br>01<br>20             | 0.0<br>00<br>88             | 54829/857/11117/2200/5654/94031/4015/255743/56937/7043/7057                                                                   | 1<br>1 |

|        |                                |                                                                |                |                           |                      |                             |                             |                                                                         |        |
|--------|--------------------------------|----------------------------------------------------------------|----------------|---------------------------|----------------------|-----------------------------|-----------------------------|-------------------------------------------------------------------------|--------|
|        | 03<br>84<br>4                  | factor beta stimulus                                           |                | 91<br>3                   | 5                    | 95<br>96                    | 36<br>92                    |                                                                         |        |
| B<br>P | G<br>O:<br>00<br>60<br>32<br>4 | face development                                               | 7/<br>40<br>8  | 46<br>/1<br>79<br>13      | 7.5<br>1E<br>-0<br>5 | 0.0<br>01<br>21<br>16<br>03 | 0.0<br>00<br>88<br>51<br>59 | 220/1277/83690/83716/4313/5156/7043                                     | 7      |
| B<br>P | G<br>O:<br>00<br>72<br>02<br>8 | nephron<br>morphogenesis                                       | 9/<br>40<br>8  | 79<br>/1<br>79<br>13      | 7.6<br>0E<br>-0<br>5 | 0.0<br>01<br>22<br>12<br>07 | 0.0<br>00<br>89<br>21<br>75 | 170690/2138/2737/26585/55083/3976/255743/5159/7490                      | 9      |
| B<br>P | G<br>O:<br>00<br>01<br>65<br>7 | ureteric bud<br>development                                    | 10<br>/4<br>08 | 98<br>/1<br>79<br>13      | 7.9<br>2E<br>-0<br>5 | 0.0<br>01<br>26<br>60<br>69 | 0.0<br>00<br>92<br>49<br>5  | 170690/9244/2138/2260/2303/2737/26585/55083/255743/7490                 | 1<br>0 |
| B<br>P | G<br>O:<br>00<br>03<br>01<br>8 | vascular process in<br>circulatory system                      | 13<br>/4<br>08 | 16<br>/1<br>17<br>91<br>3 | 8.3<br>2E<br>-0<br>5 | 0.0<br>01<br>32<br>50<br>16 | 0.0<br>00<br>96<br>80<br>15 | 59/185/9590/857/1311/1909/2303/2702/2982/3357/5139/5592/5743            | 1<br>3 |
| B<br>P | G<br>O:<br>00<br>50<br>73<br>1 | positive regulation of<br>peptidyl-tyrosine<br>phosphorylation | 14<br>/4<br>08 | 18<br>/4<br>17<br>91<br>3 | 8.5<br>3E<br>-0<br>5 | 0.0<br>01<br>35<br>22<br>52 | 0.0<br>00<br>98<br>79<br>12 | 9370/1272/9244/1464/2621/2690/26585/3082/3678/3690/3976/50507/4915/7060 | 1<br>4 |
| B<br>P | G<br>O:<br>00<br>72<br>16<br>3 | mesonephric<br>epithelium<br>development                       | 10<br>/4<br>08 | 99<br>/1<br>79<br>13      | 8.6<br>3E<br>-0<br>5 | 0.0<br>01<br>35<br>72<br>25 | 0.0<br>00<br>99<br>15<br>46 | 170690/9244/2138/2260/2303/2737/26585/55083/255743/7490                 | 1<br>0 |



|        |                                |                                                                                                             |                |                           |                             |                             |                             |                                                                   |        |
|--------|--------------------------------|-------------------------------------------------------------------------------------------------------------|----------------|---------------------------|-----------------------------|-----------------------------|-----------------------------|-------------------------------------------------------------------|--------|
| B<br>P | G<br>O:<br>00<br>72<br>16<br>4 | mesonephric tubule<br>development                                                                           | 10<br>/4<br>08 | 99<br>/1<br>79<br>13      | 8.6<br>3E<br>-0<br>5        | 0.0<br>01<br>35<br>72<br>25 | 0.0<br>00<br>99<br>15<br>46 | 170690/9244/2138/2260/2303/2737/26585/55083/255743/7490           | 1<br>0 |
| B<br>P | G<br>O:<br>00<br>72<br>07<br>3 | kidney epithelium<br>development                                                                            | 12<br>/4<br>08 | 14<br>0/<br>17<br>91<br>3 | 8.7<br>7E<br>-0<br>5        | 0.0<br>01<br>37<br>31<br>46 | 0.0<br>01<br>00<br>31<br>77 | 170690/9370/9244/2138/2260/2303/2737/26585/55083/3976/255743/7490 | 1<br>2 |
| B<br>P | G<br>O:<br>00<br>46<br>84<br>9 | bone remodeling                                                                                             | 9/<br>40<br>8  | 81<br>/1<br>79<br>13      | 9.2<br>6E<br>-0<br>5        | 0.0<br>01<br>44<br>42<br>93 | 0.0<br>01<br>05<br>51<br>54 | 115908/1513/26585/3690/3953/4286/50507/5745/7043                  | 9      |
| B<br>P | G<br>O:<br>00<br>10<br>17<br>1 | body morphogenesis                                                                                          | 7/<br>40<br>8  | 48<br>/1<br>79<br>13      | 9.9<br>3E<br>-0<br>5        | 0.0<br>01<br>54<br>33<br>9  | 0.0<br>01<br>12<br>75<br>51 | 1277/83690/83716/4313/5156/90102/7043                             | 7      |
| B<br>P | G<br>O:<br>00<br>90<br>10<br>1 | negative regulation of<br>transmembrane<br>receptor protein<br>serine/threonine kinase<br>signaling pathway | 11<br>/4<br>08 | 12<br>1/<br>17<br>91<br>3 | 0.0<br>00<br>10<br>13<br>06 | 0.0<br>01<br>56<br>73<br>31 | 0.0<br>01<br>14<br>50<br>42 | 54829/857/8483/111117/2200/26585/5654/94031/56937/6423/7043       | 1<br>1 |
| B<br>P | G<br>O:<br>00<br>18<br>14<br>9 | peptide cross-linking                                                                                       | 6/<br>40<br>8  | 34<br>/1<br>79<br>13      | 0.0<br>00<br>10<br>54<br>15 | 0.0<br>01<br>62<br>42<br>44 | 0.0<br>01<br>18<br>66<br>21 | 633/1281/1634/2162/2335/7057                                      | 6      |
| B<br>P | G<br>O:<br>00                  | mesenchymal cell<br>development                                                                             | 8/<br>40<br>8  | 65<br>/1<br>79            | 0.0<br>00<br>10             | 0.0<br>01<br>67             | 0.0<br>01<br>22             | 1909/2335/2303/9464/3357/8828/6591/7291                           | 8      |

|        |                                |                                                                        |                |                           |                             |                             |                             |                                                                                                               |        |
|--------|--------------------------------|------------------------------------------------------------------------|----------------|---------------------------|-----------------------------|-----------------------------|-----------------------------|---------------------------------------------------------------------------------------------------------------|--------|
|        | 14<br>03<br>1                  |                                                                        |                | 13                        | 97<br>13                    | 00<br>22                    | 00<br>65                    |                                                                                                               |        |
| B<br>P | G<br>O:<br>00<br>35<br>92<br>4 | cellular response to<br>vascular endothelial<br>growth factor stimulus | 8/<br>40<br>8  | 65<br>/1<br>79<br>13      | 0.0<br>00<br>10<br>97<br>13 | 0.0<br>01<br>67<br>00<br>22 | 0.0<br>01<br>22<br>00<br>65 | 81792/1634/2619/57608/8828/5156/5159/5587                                                                     | 8      |
| B<br>P | G<br>O:<br>00<br>48<br>86<br>4 | stem cell development                                                  | 8/<br>40<br>8  | 65<br>/1<br>79<br>13      | 0.0<br>00<br>10<br>97<br>13 | 0.0<br>01<br>67<br>00<br>22 | 0.0<br>01<br>22<br>00<br>65 | 1909/2335/2303/9464/3357/8828/6591/7291                                                                       | 8      |
| B<br>P | G<br>O:<br>00<br>42<br>34<br>0 | keratan sulfate<br>catabolic process                                   | 4/<br>40<br>8  | 12<br>/1<br>79<br>13      | 0.0<br>00<br>11<br>35<br>54 | 0.0<br>01<br>71<br>46<br>62 | 0.0<br>01<br>25<br>26<br>77 | 2331/4060/4958/5549                                                                                           | 4      |
| B<br>P | G<br>O:<br>00<br>90<br>33<br>1 | negative regulation of<br>platelet aggregation                         | 4/<br>40<br>8  | 12<br>/1<br>79<br>13      | 0.0<br>00<br>11<br>35<br>54 | 0.0<br>01<br>71<br>46<br>62 | 0.0<br>01<br>25<br>26<br>77 | 170692/114897/5592/5270                                                                                       | 4      |
| B<br>P | G<br>O:<br>00<br>32<br>97<br>0 | regulation of actin<br>filament-based process                          | 20<br>/4<br>08 | 34<br>/1<br>17<br>91<br>3 | 0.0<br>00<br>11<br>62<br>16 | 0.0<br>01<br>74<br>78<br>67 | 0.0<br>01<br>27<br>69<br>36 | 88/857/6356/6387/2042/80206/2316/122786/2702/91663/50507/5156/5159/10630/901<br>02/130271/5999/6781/7043/7168 | 2<br>0 |
| B<br>P | G<br>O:<br>00<br>51<br>14<br>6 | striated muscle cell<br>differentiation                                | 17<br>/4<br>08 | 26<br>/3<br>17<br>91<br>3 | 0.0<br>00<br>11<br>81<br>3  | 0.0<br>01<br>76<br>96<br>03 | 0.0<br>01<br>29<br>28<br>16 | 88/8038/552/1000/1311/80206/2627/26585/3488/4015/50507/5156/5159/5999/6444/7<br>168/7490                      | 1<br>7 |

|        |                                |                                                                   |                |                           |                             |                             |                             |                                                                           |        |
|--------|--------------------------------|-------------------------------------------------------------------|----------------|---------------------------|-----------------------------|-----------------------------|-----------------------------|---------------------------------------------------------------------------|--------|
| B<br>P | G<br>O:<br>00<br>01<br>82<br>3 | mesonephros<br>development                                        | 10<br>/4<br>08 | 10<br>3/<br>17<br>91<br>3 | 0.0<br>00<br>12<br>05<br>48 | 0.0<br>01<br>79<br>86<br>93 | 0.0<br>01<br>31<br>40<br>68 | 170690/9244/2138/2260/2303/2737/26585/55083/255743/7490                   | 1<br>0 |
| B<br>P | G<br>O:<br>00<br>10<br>51<br>7 | regulation of<br>phospholipase activity                           | 8/<br>40<br>8  | 66<br>/1<br>79<br>13      | 0.0<br>00<br>12<br>23<br>99 | 0.0<br>01<br>81<br>91<br>16 | 0.0<br>01<br>32<br>89<br>88 | 185/552/1909/2260/3357/4915/5156/5159                                     | 8      |
| B<br>P | G<br>O:<br>00<br>48<br>33<br>3 | mesodermal cell<br>differentiation                                | 6/<br>40<br>8  | 35<br>/1<br>79<br>13      | 0.0<br>00<br>12<br>48<br>03 | 0.0<br>01<br>84<br>03<br>5  | 0.0<br>01<br>34<br>45<br>01 | 2138/2260/2303/3624/3690/6423                                             | 6      |
| B<br>P | G<br>O:<br>00<br>60<br>32<br>3 | head morphogenesis                                                | 6/<br>40<br>8  | 35<br>/1<br>79<br>13      | 0.0<br>00<br>12<br>48<br>03 | 0.0<br>01<br>84<br>03<br>5  | 0.0<br>01<br>34<br>45<br>01 | 1277/83690/83716/4313/5156/7043                                           | 6      |
| B<br>P | G<br>O:<br>19<br>01<br>34<br>3 | negative regulation of<br>vasculature<br>development              | 14<br>/4<br>08 | 19<br>1/<br>17<br>91<br>3 | 0.0<br>00<br>12<br>69<br>48 | 0.0<br>01<br>86<br>47<br>08 | 0.0<br>01<br>36<br>22<br>96 | 90993/1634/11117/4223/10769/5054/5176/6678/23213/7042/7057/7058/7060/7490 | 1<br>4 |
| B<br>P | G<br>O:<br>00<br>10<br>71<br>8 | positive regulation of<br>epithelial to<br>mesenchymal transition | 7/<br>40<br>8  | 50<br>/1<br>79<br>13      | 0.0<br>00<br>12<br>96<br>09 | 0.0<br>01<br>88<br>18<br>21 | 0.0<br>01<br>37<br>47<br>98 | 8313/1277/4017/10630/7042/7043/7291                                       | 7      |
| B<br>P | G<br>O:<br>00                  | coronary vasculature<br>development                               | 7/<br>40<br>8  | 50<br>/1<br>79            | 0.0<br>00<br>12             | 0.0<br>01<br>88             | 0.0<br>01<br>37             | 11174/2627/9464/5125/5159/144165/6444                                     | 7      |

|        |                                |                                                    |                |                           |                             |                             |                             |                                                                    |        |
|--------|--------------------------------|----------------------------------------------------|----------------|---------------------------|-----------------------------|-----------------------------|-----------------------------|--------------------------------------------------------------------|--------|
|        | 60<br>97<br>6                  |                                                    |                | 13                        | 96<br>09                    | 18<br>21                    | 47<br>98                    |                                                                    |        |
| B<br>P | G<br>O:<br>00<br>86<br>00<br>9 | membrane<br>repolarization                         | 7/<br>40<br>8  | 50<br>/1<br>79<br>13      | 0.0<br>00<br>12<br>96<br>09 | 0.0<br>01<br>88<br>18<br>21 | 0.0<br>01<br>37<br>47<br>98 | 781/857/2316/2702/23704/3764/6330                                  | 7      |
| B<br>P | G<br>O:<br>00<br>42<br>47<br>5 | odontogenesis of<br>dentin-containing tooth        | 9/<br>40<br>8  | 85<br>/1<br>79<br>13      | 0.0<br>00<br>13<br>48<br>95 | 0.0<br>01<br>95<br>10<br>68 | 0.0<br>01<br>42<br>53<br>88 | 56975/2736/2737/9464/5654/9622/5156/5054/3371                      | 9      |
| B<br>P | G<br>O:<br>00<br>97<br>52<br>9 | myeloid leukocyte<br>migration                     | 13<br>/4<br>08 | 17<br>0/<br>17<br>91<br>3 | 0.0<br>00<br>14<br>42<br>01 | 0.0<br>02<br>07<br>77       | 0.0<br>01<br>51<br>79<br>02 | 6356/4345/6387/1588/11117/26585/5919/4920/7857/5054/7042/7057/7060 | 1<br>3 |
| B<br>P | G<br>O:<br>00<br>03<br>15<br>6 | regulation of animal<br>organ formation            | 6/<br>40<br>8  | 36<br>/1<br>79<br>13      | 0.0<br>00<br>14<br>69<br>13 | 0.0<br>02<br>10<br>65<br>9  | 0.0<br>01<br>53<br>90<br>08 | 2138/2260/9464/23213/7472/7490                                     | 6      |
| B<br>P | G<br>O:<br>00<br>48<br>14<br>6 | positive regulation of<br>fibroblast proliferation | 7/<br>40<br>8  | 51<br>/1<br>79<br>13      | 0.0<br>00<br>14<br>73<br>22 | 0.0<br>02<br>10<br>65<br>9  | 0.0<br>01<br>53<br>90<br>08 | 4921/2335/2621/56034/5156/5159/7472                                | 7      |
| B<br>P | G<br>O:<br>00<br>60<br>03<br>8 | cardiac muscle cell<br>proliferation               | 8/<br>40<br>8  | 68<br>/1<br>79<br>13      | 0.0<br>00<br>15<br>14<br>16 | 0.0<br>02<br>15<br>69<br>68 | 0.0<br>01<br>57<br>58<br>12 | 2260/2303/2627/3776/26011/7042/7472/23414                          | 8      |

|        |                                |                                                   |                |                           |                             |                             |                             |                                                                                                |        |
|--------|--------------------------------|---------------------------------------------------|----------------|---------------------------|-----------------------------|-----------------------------|-----------------------------|------------------------------------------------------------------------------------------------|--------|
| B<br>P | G<br>O:<br>00<br>43<br>20<br>0 | response to amino acid                            | 10<br>/4<br>08 | 10<br>6/<br>17<br>91<br>3 | 0.0<br>00<br>15<br>32<br>29 | 0.0<br>02<br>17<br>45<br>84 | 0.0<br>01<br>58<br>86<br>82 | 1307/1277/1278/1281/1290/1291/4313/4915/56034/5156                                             | 1<br>0 |
| B<br>P | G<br>O:<br>00<br>16<br>48<br>5 | protein processing                                | 18<br>/4<br>08 | 29<br>5/<br>17<br>91<br>3 | 0.0<br>00<br>15<br>52<br>26 | 0.0<br>02<br>19<br>46<br>82 | 0.0<br>01<br>60<br>33<br>65 | 9509/715/716/1066/3075/1311/10699/2619/2737/85409/5122/5125/5328/5627/5054/5270/10418/7057     | 1<br>8 |
| B<br>P | G<br>O:<br>00<br>45<br>99<br>5 | regulation of embryonic development               | 11<br>/4<br>08 | 12<br>8/<br>17<br>91<br>3 | 0.0<br>00<br>16<br>75<br>62 | 0.0<br>02<br>36<br>02<br>45 | 0.0<br>01<br>72<br>43<br>2  | 9370/1289/1290/2260/91663/90102/6423/23213/9096/26011/7472                                     | 1<br>1 |
| B<br>P | G<br>O:<br>00<br>45<br>86<br>1 | negative regulation of proteolysis                | 19<br>/4<br>08 | 32<br>4/<br>17<br>91<br>3 | 0.0<br>00<br>17<br>16<br>28 | 0.0<br>02<br>40<br>04<br>66 | 0.0<br>01<br>75<br>37<br>04 | 3730/1293/1410/1470/1893/2619/2621/3082/4130/5627/5743/5054/5270/6423/6695/7057/7076/7077/7078 | 1<br>9 |
| B<br>P | G<br>O:<br>00<br>10<br>63<br>4 | positive regulation of epithelial cell migration  | 13<br>/4<br>08 | 17<br>3/<br>17<br>91<br>3 | 0.0<br>00<br>17<br>16<br>89 | 0.0<br>02<br>40<br>04<br>66 | 0.0<br>01<br>75<br>37<br>04 | 2260/2303/3037/3690/57608/8828/10769/5587/5743/6678/27286/7042/7057                            | 1<br>3 |
| B<br>P | G<br>O:<br>00<br>72<br>01<br>2 | glomerulus vasculature development                | 5/<br>40<br>8  | 24<br>/1<br>79<br>13      | 0.0<br>00<br>17<br>78<br>11 | 0.0<br>02<br>47<br>68<br>91 | 0.0<br>01<br>80<br>95<br>38 | 59/2303/5156/5159/7490                                                                         | 5      |
| B<br>P | G<br>O:<br>00                  | positive regulation of endothelial cell migration | 11<br>/4<br>08 | 12<br>9/<br>17            | 0.0<br>00<br>17             | 0.0<br>02<br>49             | 0.0<br>01<br>81             | 2260/2303/3690/57608/8828/10769/5587/5743/6678/27286/7057                                      | 1<br>1 |

|        |                                |                                                           |                |                           |                             |                             |                             |                                                           |        |
|--------|--------------------------------|-----------------------------------------------------------|----------------|---------------------------|-----------------------------|-----------------------------|-----------------------------|-----------------------------------------------------------|--------|
|        | 10<br>59<br>5                  |                                                           |                | 91<br>3                   | 95<br>11                    | 03<br>49                    | 93<br>7                     |                                                           |        |
| B<br>P | G<br>O:<br>20<br>01<br>23<br>6 | regulation of extrinsic<br>apoptotic signaling<br>pathway | 12<br>/4<br>08 | 15<br>1/<br>17<br>91<br>3 | 0.0<br>00<br>18<br>00<br>97 | 0.0<br>02<br>49<br>03<br>49 | 0.0<br>01<br>81<br>93<br>7  | 658/857/2260/3082/3624/7857/5054/6423/6591/8406/7057/7078 | 1<br>2 |
| B<br>P | G<br>O:<br>00<br>14<br>03<br>3 | neural crest cell<br>differentiation                      | 8/<br>40<br>8  | 70<br>/1<br>79<br>13      | 0.0<br>00<br>18<br>58<br>76 | 0.0<br>02<br>55<br>15<br>66 | 0.0<br>01<br>86<br>40<br>93 | 1909/2335/2303/9464/3357/8828/6591/7291                   | 8      |
| B<br>P | G<br>O:<br>00<br>60<br>19<br>3 | positive regulation of<br>lipase activity                 | 8/<br>40<br>8  | 70<br>/1<br>79<br>13      | 0.0<br>00<br>18<br>58<br>76 | 0.0<br>02<br>55<br>15<br>66 | 0.0<br>01<br>86<br>40<br>93 | 185/552/1909/2260/3357/4915/5156/5159                     | 8      |
| B<br>P | G<br>O:<br>00<br>50<br>92<br>1 | positive regulation of<br>chemotaxis                      | 11<br>/4<br>08 | 13<br>0/<br>17<br>91<br>3 | 0.0<br>00<br>19<br>21<br>76 | 0.0<br>02<br>62<br>84<br>94 | 0.0<br>01<br>92<br>02<br>94 | 1012/6387/2260/2621/5159/5587/5919/7857/5054/7057/7060    | 1<br>1 |
| B<br>P | G<br>O:<br>00<br>72<br>00<br>9 | nephron epithelium<br>development                         | 10<br>/4<br>08 | 10<br>9/<br>17<br>91<br>3 | 0.0<br>00<br>19<br>30<br>77 | 0.0<br>02<br>63<br>12<br>87 | 0.0<br>01<br>92<br>23<br>35 | 170690/9370/2138/2303/2737/26585/55083/3976/255743/7490   | 1<br>0 |
| B<br>P | G<br>O:<br>00<br>42<br>31<br>0 | vasoconstriction                                          | 8/<br>40<br>8  | 71<br>/1<br>79<br>13      | 0.0<br>00<br>20<br>53<br>79 | 0.0<br>02<br>77<br>17<br>89 | 0.0<br>02<br>02<br>49<br>81 | 59/185/857/1311/1909/2702/3357/5743                       | 8      |

|        |                                |                                          |                |                           |                             |                             |                             |                                                                                           |        |
|--------|--------------------------------|------------------------------------------|----------------|---------------------------|-----------------------------|-----------------------------|-----------------------------|-------------------------------------------------------------------------------------------|--------|
| B<br>P | G<br>O:<br>00<br>03<br>23<br>1 | cardiac ventricle<br>development         | 11<br>/4<br>08 | 13<br>/1<br>17<br>91<br>3 | 0.0<br>00<br>20<br>55<br>9  | 0.0<br>02<br>77<br>17<br>89 | 0.0<br>02<br>02<br>49<br>81 | 1301/1363/2303/2702/9464/3776/57167/6423/7042/7168/23414                                  | 1<br>1 |
| B<br>P | G<br>O:<br>00<br>07<br>22<br>4 | smoothened signaling<br>pathway          | 11<br>/4<br>08 | 13<br>/1<br>17<br>91<br>3 | 0.0<br>00<br>20<br>55<br>9  | 0.0<br>02<br>77<br>17<br>89 | 0.0<br>02<br>02<br>49<br>81 | 22873/5167/2121/132884/2619/2736/2737/84662/5396/4920/5270                                | 1<br>1 |
| B<br>P | G<br>O:<br>00<br>48<br>56<br>2 | embryonic organ<br>morphogenesis         | 17<br>/4<br>08 | 27<br>/6<br>17<br>91<br>3 | 0.0<br>00<br>21<br>03<br>55 | 0.0<br>02<br>82<br>59<br>4  | 0.0<br>02<br>06<br>45<br>41 | 220/1301/115908/2202/2138/2200/2260/2303/2736/2737/9464/4237/5156/5396/4920/<br>7043/7291 | 1<br>7 |
| B<br>P | G<br>O:<br>00<br>70<br>20<br>6 | protein trimerization                    | 7/<br>40<br>8  | 54<br>/1<br>79<br>13      | 0.0<br>00<br>21<br>25<br>36 | 0.0<br>02<br>84<br>51<br>24 | 0.0<br>02<br>07<br>85<br>57 | 9370/114897/1277/1278/1291/1292/11117                                                     | 7      |
| B<br>P | G<br>O:<br>00<br>16<br>52<br>5 | negative regulation of<br>angiogenesis   | 13<br>/4<br>08 | 17<br>/7<br>17<br>91<br>3 | 0.0<br>00<br>21<br>52<br>6  | 0.0<br>02<br>87<br>13<br>98 | 0.0<br>02<br>09<br>77<br>52 | 90993/1634/11117/4223/10769/5054/5176/6678/23213/7042/7057/7058/7060                      | 1<br>3 |
| B<br>P | G<br>O:<br>00<br>42<br>73<br>0 | fibrinolysis                             | 5/<br>40<br>8  | 25<br>/1<br>79<br>13      | 0.0<br>00<br>21<br>81<br>37 | 0.0<br>02<br>89<br>95<br>32 | 0.0<br>02<br>11<br>83<br>06 | 2191/5328/5627/5054/7057                                                                  | 5      |
| B<br>P | G<br>O:<br>00                  | chondroitin sulfate<br>catabolic process | 4/<br>40<br>8  | 14<br>/1<br>79            | 0.0<br>00<br>22             | 0.0<br>02<br>92             | 0.0<br>02<br>13             | 633/1464/1634/1462                                                                        | 4      |

|        |                                |                                                         |                |                           |                             |                             |                             |                                                                                                           |        |
|--------|--------------------------------|---------------------------------------------------------|----------------|---------------------------|-----------------------------|-----------------------------|-----------------------------|-----------------------------------------------------------------------------------------------------------|--------|
|        | 30<br>20<br>7                  |                                                         |                | 13                        | 14<br>68                    | 32<br>25                    | 56<br>15                    |                                                                                                           |        |
| B<br>P | G<br>O:<br>00<br>72<br>21<br>6 | positive regulation of<br>metanephros<br>development    | 4/<br>40<br>8  | 14<br>/1<br>79<br>13      | 0.0<br>00<br>22<br>14<br>68 | 0.0<br>02<br>92<br>32<br>25 | 0.0<br>02<br>13<br>56<br>15 | 9370/3976/5159/7490                                                                                       | 4      |
| B<br>P | G<br>O:<br>00<br>42<br>69<br>2 | muscle cell<br>differentiation                          | 20<br>/4<br>08 | 35<br>9/<br>17<br>91<br>3 | 0.0<br>00<br>23<br>03<br>51 | 0.0<br>03<br>02<br>98<br>85 | 0.0<br>02<br>21<br>35<br>37 | 88/8038/552/1000/1311/80206/2627/26585/3488/4015/50507/255743/93145/5156/5159/5999/6444/23345/7168/7490   | 2<br>0 |
| B<br>P | G<br>O:<br>00<br>50<br>88<br>0 | regulation of blood<br>vessel size                      | 11<br>/4<br>08 | 13<br>3/<br>17<br>91<br>3 | 0.0<br>00<br>23<br>48<br>07 | 0.0<br>03<br>07<br>77<br>59 | 0.0<br>02<br>24<br>85<br>13 | 59/185/857/1311/1909/2303/2702/2982/3357/5592/5743                                                        | 1<br>1 |
| B<br>P | G<br>O:<br>20<br>00<br>18<br>1 | negative regulation of<br>blood vessel<br>morphogenesis | 13<br>/4<br>08 | 17<br>9/<br>17<br>91<br>3 | 0.0<br>00<br>24<br>03<br>86 | 0.0<br>03<br>13<br>99<br>96 | 0.0<br>02<br>29<br>39<br>81 | 90993/1634/11117/4223/10769/5054/5176/6678/23213/7042/7057/7058/7060                                      | 1<br>3 |
| B<br>P | G<br>O:<br>00<br>60<br>41<br>9 | heart growth                                            | 10<br>/4<br>08 | 11<br>2/<br>17<br>91<br>3 | 0.0<br>00<br>24<br>12<br>94 | 0.0<br>03<br>14<br>09<br>87 | 0.0<br>02<br>29<br>47<br>05 | 2260/2303/2627/3776/5999/26011/7042/7472/7490/23414                                                       | 1<br>0 |
| B<br>P | G<br>O:<br>00<br>70<br>48<br>2 | response to oxygen<br>levels                            | 21<br>/4<br>08 | 38<br>9/<br>17<br>91<br>3 | 0.0<br>00<br>24<br>80<br>77 | 0.0<br>03<br>21<br>81<br>82 | 0.0<br>02<br>35<br>11<br>01 | 9370/857/1277/1410/6387/1909/2627/3776/4017/50507/5159/5328/5352/10631/5740/5743/6781/7042/7043/7057/7291 | 2<br>1 |



|        |                                |                                                                    |                |                           |                             |                             |                             |                                                    |        |
|--------|--------------------------------|--------------------------------------------------------------------|----------------|---------------------------|-----------------------------|-----------------------------|-----------------------------|----------------------------------------------------|--------|
| B<br>P | G<br>O:<br>00<br>03<br>20<br>8 | cardiac ventricle<br>morphogenesis                                 | 8/<br>40<br>8  | 73<br>/1<br>79<br>13      | 0.0<br>00<br>24<br>94<br>34 | 0.0<br>03<br>22<br>47<br>08 | 0.0<br>02<br>35<br>58<br>69 | 1301/1363/2303/9464/6423/7042/7168/23414           | 8      |
| B<br>P | G<br>O:<br>00<br>35<br>15<br>0 | regulation of tube size                                            | 11<br>/4<br>08 | 13<br>4/<br>17<br>91<br>3 | 0.0<br>00<br>25<br>06<br>84 | 0.0<br>03<br>22<br>98<br>89 | 0.0<br>02<br>35<br>95<br>89 | 59/185/857/1311/1909/2303/2702/2982/3357/5592/5743 | 1<br>1 |
| B<br>P | G<br>O:<br>00<br>61<br>43<br>7 | renal system<br>vasculature<br>development                         | 5/<br>40<br>8  | 26<br>/1<br>79<br>13      | 0.0<br>00<br>26<br>50<br>62 | 0.0<br>03<br>36<br>90<br>57 | 0.0<br>02<br>46<br>13<br>26 | 59/2303/5156/5159/7490                             | 5      |
| B<br>P | G<br>O:<br>00<br>61<br>44<br>0 | kidney vasculature<br>development                                  | 5/<br>40<br>8  | 26<br>/1<br>79<br>13      | 0.0<br>00<br>26<br>50<br>62 | 0.0<br>03<br>36<br>90<br>57 | 0.0<br>02<br>46<br>13<br>26 | 59/2303/5156/5159/7490                             | 5      |
| B<br>P | G<br>O:<br>00<br>70<br>16<br>8 | negative regulation of<br>biomineral tissue<br>development         | 5/<br>40<br>8  | 26<br>/1<br>79<br>13      | 0.0<br>00<br>26<br>50<br>62 | 0.0<br>03<br>36<br>90<br>57 | 0.0<br>02<br>46<br>13<br>26 | 54829/1893/5167/2621/26585                         | 5      |
| B<br>P | G<br>O:<br>00<br>72<br>27<br>3 | metanephric nephron<br>morphogenesis                               | 5/<br>40<br>8  | 26<br>/1<br>79<br>13      | 0.0<br>00<br>26<br>50<br>62 | 0.0<br>03<br>36<br>90<br>57 | 0.0<br>02<br>46<br>13<br>26 | 26585/55083/3976/5159/7490                         | 5      |
| B<br>P | G<br>O:<br>00                  | cardiac muscle cell<br>action potential<br>involved in contraction | 7/<br>40<br>8  | 56<br>/1<br>79            | 0.0<br>00<br>26             | 0.0<br>03<br>37             | 0.0<br>02<br>46             | 781/857/2316/2702/23704/3764/6330                  | 7      |

|        |                                |                                                      |                |                           |                             |                             |                             |                                                                               |        |
|--------|--------------------------------|------------------------------------------------------|----------------|---------------------------|-----------------------------|-----------------------------|-----------------------------|-------------------------------------------------------------------------------|--------|
|        | 86<br>00<br>2                  |                                                      |                | 13                        | 76<br>71                    | 38<br>24                    | 48<br>08                    |                                                                               |        |
| B<br>P | G<br>O:<br>00<br>02<br>04<br>0 | sprouting angiogenesis                               | 13<br>/4<br>08 | 18<br>1/<br>17<br>91<br>3 | 0.0<br>00<br>26<br>79<br>82 | 0.0<br>03<br>37<br>38<br>24 | 0.0<br>02<br>46<br>48<br>08 | 185/1012/90993/2303/26585/3678/57608/4017/4223/10769/5743/27286/7057          | 1<br>3 |
| B<br>P | G<br>O:<br>00<br>38<br>08<br>4 | vascular endothelial growth factor signaling pathway | 6/<br>40<br>8  | 40<br>/1<br>79<br>13      | 0.0<br>00<br>26<br>81<br>18 | 0.0<br>03<br>37<br>38<br>24 | 0.0<br>02<br>46<br>48<br>08 | 1634/57608/8828/5156/5159/5587                                                | 6      |
| B<br>P | G<br>O:<br>00<br>10<br>59<br>4 | regulation of endothelial cell migration             | 15<br>/4<br>08 | 23<br>1/<br>17<br>91<br>3 | 0.0<br>00<br>27<br>95<br>88 | 0.0<br>03<br>50<br>64<br>63 | 0.0<br>02<br>56<br>17<br>1  | 1634/2260/2303/3690/57608/4223/8828/10769/5587/5743/5176/6678/27286/6781/7057 | 1<br>5 |
| B<br>P | G<br>O:<br>00<br>60<br>19<br>1 | regulation of lipase activity                        | 9/<br>40<br>8  | 94<br>/1<br>79<br>13      | 0.0<br>00<br>29<br>11<br>97 | 0.0<br>03<br>63<br>99<br>63 | 0.0<br>02<br>65<br>92<br>41 | 185/552/1909/2260/3357/4915/5125/5156/5159                                    | 9      |
| B<br>P | G<br>O:<br>00<br>34<br>11<br>1 | negative regulation of homotypic cell-cell adhesion  | 4/<br>40<br>8  | 15<br>/1<br>79<br>13      | 0.0<br>00<br>29<br>65<br>92 | 0.0<br>03<br>68<br>30<br>07 | 0.0<br>02<br>69<br>06<br>88 | 170692/114897/5592/5270                                                       | 4      |
| B<br>P | G<br>O:<br>00<br>72<br>10<br>9 | glomerular mesangium development                     | 4/<br>40<br>8  | 15<br>/1<br>79<br>13      | 0.0<br>00<br>29<br>65<br>92 | 0.0<br>03<br>68<br>30<br>07 | 0.0<br>02<br>69<br>06<br>88 | 59/2303/5159/7490                                                             | 4      |

|        |                                |                                                                 |                |                           |                             |                             |                             |                                                                                                     |        |
|--------|--------------------------------|-----------------------------------------------------------------|----------------|---------------------------|-----------------------------|-----------------------------|-----------------------------|-----------------------------------------------------------------------------------------------------|--------|
| B<br>P | G<br>O:<br>00<br>98<br>74<br>2 | cell-cell adhesion via<br>plasma-membrane<br>adhesion molecules | 15<br>/4<br>08 | 23<br>3/<br>17<br>91<br>3 | 0.0<br>00<br>30<br>66<br>23 | 0.0<br>03<br>79<br>50<br>92 | 0.0<br>02<br>77<br>25<br>73 | 9370/1012/1000/64084/120114/2239/3678/91663/5099/5101/5789/91179/55714/7042/<br>7216                | 1<br>5 |
| B<br>P | G<br>O:<br>00<br>48<br>01<br>5 | phosphatidylinositol-me<br>diated signaling                     | 12<br>/4<br>08 | 16<br>0/<br>17<br>91<br>3 | 0.0<br>00<br>30<br>83<br>18 | 0.0<br>03<br>80<br>35<br>94 | 0.0<br>02<br>77<br>87<br>84 | 1634/2260/3082/3357/8660/4883/4915/5156/5159/5270/7042/7291                                         | 1<br>2 |
| B<br>P | G<br>O:<br>00<br>33<br>27<br>3 | response to vitamin                                             | 9/<br>40<br>8  | 95<br>/1<br>79<br>13      | 0.0<br>00<br>31<br>53<br>22 | 0.0<br>03<br>86<br>47<br>47 | 0.0<br>02<br>82<br>34<br>61 | 1277/2621/4131/10631/5743/6591/6678/6781/3371                                                       | 9      |
| B<br>P | G<br>O:<br>00<br>60<br>99<br>3 | kidney morphogenesis                                            | 9/<br>40<br>8  | 95<br>/1<br>79<br>13      | 0.0<br>00<br>31<br>53<br>22 | 0.0<br>03<br>86<br>47<br>47 | 0.0<br>02<br>82<br>34<br>61 | 170690/2138/2737/26585/55083/3976/255743/5159/7490                                                  | 9      |
| B<br>P | G<br>O:<br>19<br>02<br>90<br>3 | regulation of<br>supramolecular fiber<br>organization           | 18<br>/4<br>08 | 31<br>3/<br>17<br>91<br>3 | 0.0<br>00<br>32<br>04<br>19 | 0.0<br>03<br>91<br>44<br>99 | 0.0<br>02<br>85<br>98<br>09 | 88/165/6356/1410/6387/11117/80206/2316/4131/91663/89795/50507/90102/130271/5<br>999/11075/7043/7168 | 1<br>8 |
| B<br>P | G<br>O:<br>00<br>14<br>06<br>5 | phosphatidylinositol<br>3-kinase signaling                      | 11<br>/4<br>08 | 13<br>8/<br>17<br>91<br>3 | 0.0<br>00<br>32<br>35<br>73 | 0.0<br>03<br>94<br>02<br>86 | 0.0<br>02<br>87<br>86<br>47 | 1634/2260/3082/3357/8660/4915/5156/5159/5270/7042/7291                                              | 1<br>1 |
| B<br>P | G<br>O:<br>00                  | negative regulation of<br>endopeptidase activity                | 14<br>/4<br>08 | 21<br>0/<br>17            | 0.0<br>00<br>33             | 0.0<br>04<br>12             | 0.0<br>03<br>00             | 3730/1293/1410/1470/2621/3082/5627/5743/5054/6423/6695/7057/7076/7078                               | 1<br>4 |

|        |                                |                                                             |                |                           |                             |                             |                             |                                                             |        |
|--------|--------------------------------|-------------------------------------------------------------|----------------|---------------------------|-----------------------------|-----------------------------|-----------------------------|-------------------------------------------------------------|--------|
|        | 10<br>95<br>1                  |                                                             |                | 91<br>3                   | 94<br>26                    | 00<br>38                    | 99<br>68                    |                                                             |        |
| B<br>P | G<br>O:<br>00<br>01<br>95<br>2 | regulation of cell-matrix<br>adhesion                       | 10<br>/4<br>08 | 11<br>7/<br>17<br>91<br>3 | 0.0<br>00<br>34<br>39<br>5  | 0.0<br>04<br>14<br>82<br>84 | 0.0<br>03<br>03<br>06<br>04 | 1012/1307/2042/26585/90102/5328/10631/5054/7057/7070        | 1<br>0 |
| B<br>P | G<br>O:<br>00<br>14<br>06<br>6 | regulation of<br>phosphatidylinositol<br>3-kinase signaling | 10<br>/4<br>08 | 11<br>7/<br>17<br>91<br>3 | 0.0<br>00<br>34<br>39<br>5  | 0.0<br>04<br>14<br>82<br>84 | 0.0<br>03<br>03<br>06<br>04 | 1634/2260/3082/8660/4915/5156/5159/5270/7042/7291           | 1<br>0 |
| B<br>P | G<br>O:<br>00<br>99<br>62<br>2 | cardiac muscle cell<br>membrane<br>repolarization           | 6/<br>40<br>8  | 42<br>/1<br>79<br>13      | 0.0<br>00<br>35<br>26<br>47 | 0.0<br>04<br>23<br>96<br>3  | 0.0<br>03<br>09<br>73<br>39 | 781/2316/2702/23704/3764/6330                               | 6      |
| B<br>P | G<br>O:<br>00<br>30<br>27<br>9 | negative regulation of<br>ossification                      | 8/<br>40<br>8  | 77<br>/1<br>79<br>13      | 0.0<br>00<br>36<br>08<br>12 | 0.0<br>04<br>31<br>03<br>39 | 0.0<br>03<br>14<br>89<br>96 | 8313/1893/5167/26585/9464/3488/63923/7291                   | 8      |
| B<br>P | G<br>O:<br>00<br>72<br>08<br>8 | nephron epithelium<br>morphogenesis                         | 8/<br>40<br>8  | 77<br>/1<br>79<br>13      | 0.0<br>00<br>36<br>08<br>12 | 0.0<br>04<br>31<br>03<br>39 | 0.0<br>03<br>14<br>89<br>96 | 170690/2138/2737/26585/55083/3976/255743/7490               | 8      |
| B<br>P | G<br>O:<br>00<br>48<br>01<br>7 | inositol lipid-mediated<br>signaling                        | 12<br>/4<br>08 | 16<br>3/<br>17<br>91<br>3 | 0.0<br>00<br>36<br>54<br>34 | 0.0<br>04<br>35<br>17<br>73 | 0.0<br>03<br>17<br>92<br>67 | 1634/2260/3082/3357/8660/4883/4915/5156/5159/5270/7042/7291 | 1<br>2 |

|        |                                |                                                                       |                |                           |                             |                             |                             |                                                                                                 |        |
|--------|--------------------------------|-----------------------------------------------------------------------|----------------|---------------------------|-----------------------------|-----------------------------|-----------------------------|-------------------------------------------------------------------------------------------------|--------|
| B<br>P | G<br>O:<br>00<br>18<br>14<br>6 | keratan sulfate<br>biosynthetic process                               | 5/<br>40<br>8  | 28<br>/1<br>79<br>13      | 0.0<br>00<br>38<br>14<br>71 | 0.0<br>04<br>52<br>84<br>71 | 0.0<br>03<br>30<br>83<br>56 | 4166/2331/4060/4958/5549                                                                        | 5      |
| B<br>P | G<br>O:<br>00<br>45<br>16<br>5 | cell fate commitment                                                  | 15<br>/4<br>08 | 23<br>8/<br>17<br>91<br>3 | 0.0<br>00<br>38<br>42<br>56 | 0.0<br>04<br>54<br>72<br>32 | 0.0<br>03<br>32<br>20<br>63 | 2138/2260/2303/2619/2627/2736/2737/4286/10630/5396/4920/6423/26011/7490/2592<br>5               | 1<br>5 |
| B<br>P | G<br>O:<br>00<br>07<br>56<br>8 | aging                                                                 | 18<br>/4<br>08 | 31<br>8/<br>17<br>91<br>3 | 0.0<br>00<br>38<br>74<br>22 | 0.0<br>04<br>55<br>31<br>75 | 0.0<br>03<br>32<br>64<br>05 | 1311/1410/1634/3488/4017/50507/9891/5159/10769/5549/5743/5745/5054/5176/7043<br>/7076/7077/7291 | 1<br>8 |
| B<br>P | G<br>O:<br>00<br>10<br>93<br>4 | macrophage cytokine<br>production                                     | 4/<br>40<br>8  | 16<br>/1<br>79<br>13      | 0.0<br>00<br>38<br>83<br>77 | 0.0<br>04<br>55<br>31<br>75 | 0.0<br>03<br>32<br>64<br>05 | 2621/10417/7042/7043                                                                            | 4      |
| B<br>P | G<br>O:<br>00<br>72<br>22<br>4 | metanephric<br>glomerulus<br>development                              | 4/<br>40<br>8  | 16<br>/1<br>79<br>13      | 0.0<br>00<br>38<br>83<br>77 | 0.0<br>04<br>55<br>31<br>75 | 0.0<br>03<br>32<br>64<br>05 | 9370/5156/5159/7490                                                                             | 4      |
| B<br>P | G<br>O:<br>00<br>08<br>58<br>9 | regulation of<br>smoothened signaling<br>pathway                      | 8/<br>40<br>8  | 78<br>/1<br>79<br>13      | 0.0<br>00<br>39<br>41<br>94 | 0.0<br>04<br>59<br>28<br>48 | 0.0<br>03<br>35<br>53<br>89 | 5167/2121/2619/2736/2737/84662/5396/5270                                                        | 8      |
| B<br>P | G<br>O:<br>00                  | negative regulation of<br>transforming growth<br>factor beta receptor | 8/<br>40<br>8  | 78<br>/1<br>79            | 0.0<br>00<br>39             | 0.0<br>04<br>59             | 0.0<br>03<br>35             | 54829/857/11117/2200/5654/94031/56937/7043                                                      | 8      |

|        |                                |                                                                              |                |                           |                             |                             |                             |                                                                                         |        |
|--------|--------------------------------|------------------------------------------------------------------------------|----------------|---------------------------|-----------------------------|-----------------------------|-----------------------------|-----------------------------------------------------------------------------------------|--------|
|        | 30<br>51<br>2                  | signaling pathway                                                            |                | 13                        | 41<br>94                    | 28<br>48                    | 53<br>89                    |                                                                                         |        |
| B<br>P | G<br>O:<br>00<br>03<br>04<br>4 | regulation of systemic arterial blood pressure mediated by a chemical signal | 6/<br>40<br>8  | 43<br>/1<br>79<br>13      | 0.0<br>00<br>40<br>20<br>58 | 0.0<br>04<br>67<br>00<br>55 | 0.0<br>03<br>41<br>17<br>93 | 185/1066/10699/2702/5125/7168                                                           | 6      |
| B<br>P | G<br>O:<br>00<br>34<br>32<br>9 | cell junction assembly                                                       | 14<br>/4<br>08 | 21<br>4/<br>17<br>91<br>3 | 0.0<br>00<br>41<br>07<br>59 | 0.0<br>04<br>75<br>64<br>83 | 0.0<br>03<br>47<br>49<br>35 | 88/857/1307/2042/10979/2316/2335/2702/26585/3678/90102/6591/7057/7070                   | 1<br>4 |
| B<br>P | G<br>O:<br>00<br>97<br>75<br>6 | negative regulation of blood vessel diameter                                 | 8/<br>40<br>8  | 79<br>/1<br>79<br>13      | 0.0<br>00<br>43<br>00<br>45 | 0.0<br>04<br>96<br>45<br>81 | 0.0<br>03<br>62<br>69<br>65 | 59/185/857/1311/1909/2702/3357/5743                                                     | 8      |
| B<br>P | G<br>O:<br>00<br>10<br>63<br>2 | regulation of epithelial cell migration                                      | 17<br>/4<br>08 | 29<br>4/<br>17<br>91<br>3 | 0.0<br>00<br>43<br>82<br>29 | 0.0<br>05<br>04<br>36<br>39 | 0.0<br>03<br>68<br>47<br>22 | 1634/2260/2303/3037/3690/57608/4223/8828/10769/5587/5743/5176/6678/27286/6781/7042/7057 | 1<br>7 |
| B<br>P | G<br>O:<br>00<br>55<br>00<br>7 | cardiac muscle cell differentiation                                          | 10<br>/4<br>08 | 12<br>1/<br>17<br>91<br>3 | 0.0<br>00<br>45<br>02<br>51 | 0.0<br>05<br>16<br>62<br>52 | 0.0<br>03<br>77<br>42<br>99 | 88/80206/2627/26585/50507/5156/5159/5999/6444/7490                                      | 1<br>0 |
| B<br>P | G<br>O:<br>00<br>35<br>85<br>0 | epithelial cell differentiation involved in kidney development               | 6/<br>40<br>8  | 44<br>/1<br>79<br>13      | 0.0<br>00<br>45<br>67<br>12 | 0.0<br>05<br>22<br>45<br>04 | 0.0<br>03<br>81<br>68<br>56 | 59/9370/2303/26585/3976/7490                                                            | 6      |

|        |                                |                                                                                               |                |                           |                             |                             |                             |                                                              |        |
|--------|--------------------------------|-----------------------------------------------------------------------------------------------|----------------|---------------------------|-----------------------------|-----------------------------|-----------------------------|--------------------------------------------------------------|--------|
| B<br>P | G<br>O:<br>00<br>43<br>27<br>1 | negative regulation of<br>ion transport                                                       | 11<br>/4<br>08 | 14<br>4/<br>17            | 0.0<br>00<br>46             | 0.0<br>05<br>27             | 0.0<br>03<br>85             | 88/857/2669/8660/5743/5999/5270/6424/6781/7057/7291          | 1<br>1 |
| B<br>P | G<br>O:<br>00<br>43<br>53<br>6 | positive regulation of<br>blood vessel<br>endothelial cell<br>migration                       | 8/<br>40<br>8  | 80<br>/1<br>79<br>13      | 0.0<br>00<br>46<br>84<br>98 | 0.0<br>05<br>27<br>93<br>44 | 0.0<br>03<br>85<br>69<br>2  | 2260/2303/57608/10769/5587/5743/27286/7057                   | 8      |
| B<br>P | G<br>O:<br>00<br>50<br>88<br>6 | endocrine process                                                                             | 8/<br>40<br>8  | 80<br>/1<br>79<br>13      | 0.0<br>00<br>46<br>84<br>98 | 0.0<br>05<br>27<br>93<br>44 | 0.0<br>03<br>85<br>69<br>2  | 185/114897/1066/10699/2260/2702/3624/5125                    | 8      |
| B<br>P | G<br>O:<br>01<br>10<br>11<br>0 | positive regulation of<br>animal organ<br>morphogenesis                                       | 8/<br>40<br>8  | 80<br>/1<br>79<br>13      | 0.0<br>00<br>46<br>84<br>98 | 0.0<br>05<br>27<br>93<br>44 | 0.0<br>03<br>85<br>69<br>2  | 2260/26585/9464/3976/7042/7291/7472/7490                     | 8      |
| B<br>P | G<br>O:<br>19<br>03<br>84<br>5 | negative regulation of<br>cellular response to<br>transforming growth<br>factor beta stimulus | 8/<br>40<br>8  | 80<br>/1<br>79<br>13      | 0.0<br>00<br>46<br>84<br>98 | 0.0<br>05<br>27<br>93<br>44 | 0.0<br>03<br>85<br>69<br>2  | 54829/857/11117/2200/5654/94031/56937/7043                   | 8      |
| B<br>P | G<br>O:<br>00<br>71<br>77<br>4 | response to fibroblast<br>growth factor                                                       | 11<br>/4<br>08 | 14<br>5/<br>17<br>91<br>3 | 0.0<br>00<br>49<br>40<br>15 | 0.0<br>05<br>55<br>03<br>22 | 0.0<br>04<br>05<br>48<br>89 | 3730/1277/90993/56975/2260/23768/10631/23213/55959/7057/3371 | 1<br>1 |
| B<br>P | G<br>O:<br>00                  | chondrocyte<br>proliferation                                                                  | 4/<br>40<br>8  | 17<br>/1<br>79            | 0.0<br>00<br>49             | 0.0<br>05<br>55             | 0.0<br>04<br>05             | 658/1311/4921/6781                                           | 4      |

|        |                                |                                                                            |               |                      |                             |                             |                             |                                             |   |
|--------|--------------------------------|----------------------------------------------------------------------------|---------------|----------------------|-----------------------------|-----------------------------|-----------------------------|---------------------------------------------|---|
|        | 35<br>98<br>8                  |                                                                            |               | 13                   | 87<br>93                    | 44<br>05                    | 78<br>71                    |                                             |   |
| B<br>P | G<br>O:<br>00<br>40<br>03<br>7 | negative regulation of fibroblast growth factor receptor signaling pathway | 4/<br>40<br>8 | 17<br>/1<br>79<br>13 | 0.0<br>00<br>49<br>87<br>93 | 0.0<br>05<br>55<br>44<br>05 | 0.0<br>04<br>05<br>78<br>71 | 90993/23213/55959/7057                      | 4 |
| B<br>P | G<br>O:<br>20<br>00<br>81<br>1 | negative regulation of anoikis                                             | 4/<br>40<br>8 | 17<br>/1<br>79<br>13 | 0.0<br>00<br>49<br>87<br>93 | 0.0<br>05<br>55<br>44<br>05 | 0.0<br>04<br>05<br>78<br>71 | 857/3678/4915/6591                          | 4 |
| B<br>P | G<br>O:<br>00<br>07<br>04<br>5 | cell-substrate adherens junction assembly                                  | 8/<br>40<br>8 | 81<br>/1<br>79<br>13 | 0.0<br>00<br>50<br>96<br>94 | 0.0<br>05<br>60<br>96<br>03 | 0.0<br>04<br>09<br>81<br>97 | 88/1307/2042/10979/26585/90102/7057/7070    | 8 |
| B<br>P | G<br>O:<br>00<br>14<br>06<br>8 | positive regulation of phosphatidylinositol 3-kinase signaling             | 8/<br>40<br>8 | 81<br>/1<br>79<br>13 | 0.0<br>00<br>50<br>96<br>94 | 0.0<br>05<br>60<br>96<br>03 | 0.0<br>04<br>09<br>81<br>97 | 1634/2260/3082/8660/4915/5156/5159/7042     | 8 |
| B<br>P | G<br>O:<br>00<br>30<br>51<br>0 | regulation of BMP signaling pathway                                        | 8/<br>40<br>8 | 81<br>/1<br>79<br>13 | 0.0<br>00<br>50<br>96<br>94 | 0.0<br>05<br>60<br>96<br>03 | 0.0<br>04<br>09<br>81<br>97 | 2200/26585/5654/94031/6423/6424/23213/23090 | 8 |
| B<br>P | G<br>O:<br>00<br>48<br>04<br>1 | focal adhesion assembly                                                    | 8/<br>40<br>8 | 81<br>/1<br>79<br>13 | 0.0<br>00<br>50<br>96<br>94 | 0.0<br>05<br>60<br>96<br>03 | 0.0<br>04<br>09<br>81<br>97 | 88/1307/2042/10979/26585/90102/7057/7070    | 8 |



|        |                                |                                       |                |                           |                             |                             |                             |                                                                                                 |        |
|--------|--------------------------------|---------------------------------------|----------------|---------------------------|-----------------------------|-----------------------------|-----------------------------|-------------------------------------------------------------------------------------------------|--------|
| B<br>P | G<br>O:<br>00<br>22<br>60<br>2 | ovulation cycle process               | 6/<br>40<br>8  | 45<br>/1<br>79<br>13      | 0.0<br>00<br>51<br>69<br>85 | 0.0<br>05<br>67<br>33<br>12 | 0.0<br>04<br>14<br>47<br>41 | 658/3624/4327/5156/7042/7043                                                                    | 6      |
| B<br>P | G<br>O:<br>00<br>01<br>66<br>6 | response to hypoxia                   | 19<br>/4<br>08 | 35<br>4/<br>17<br>91<br>3 | 0.0<br>00<br>51<br>95<br>18 | 0.0<br>05<br>68<br>45<br>84 | 0.0<br>04<br>15<br>29<br>76 | 9370/857/1410/6387/1909/2627/3776/4017/50507/5328/5352/10631/5740/5743/6781/7042/7043/7057/7291 | 1<br>9 |
| B<br>P | G<br>O:<br>00<br>16<br>33<br>1 | morphogenesis of embryonic epithelium | 11<br>/4<br>08 | 14<br>6/<br>17<br>91<br>3 | 0.0<br>00<br>52<br>35<br>93 | 0.0<br>05<br>71<br>26<br>08 | 0.0<br>04<br>17<br>34<br>49 | 220/115908/2736/26585/144165/57167/6423/23213/7042/7291/7472                                    | 1<br>1 |
| B<br>P | G<br>O:<br>00<br>14<br>85<br>5 | striated muscle cell proliferation    | 8/<br>40<br>8  | 82<br>/1<br>79<br>13      | 0.0<br>00<br>55<br>37<br>75 | 0.0<br>06<br>00<br>71<br>83 | 0.0<br>04<br>38<br>86<br>57 | 2260/2303/2627/3776/26011/7042/7472/23414                                                       | 8      |
| B<br>P | G<br>O:<br>00<br>48<br>64<br>4 | muscle organ morphogenesis            | 8/<br>40<br>8  | 82<br>/1<br>79<br>13      | 0.0<br>00<br>55<br>37<br>75 | 0.0<br>06<br>00<br>71<br>83 | 0.0<br>04<br>38<br>86<br>57 | 1301/1281/2303/3976/7042/7168/7472/23414                                                        | 8      |
| B<br>P | G<br>O:<br>00<br>35<br>29<br>6 | regulation of tube diameter           | 10<br>/4<br>08 | 12<br>5/<br>17<br>91<br>3 | 0.0<br>00<br>58<br>25<br>17 | 0.0<br>06<br>28<br>28<br>64 | 0.0<br>04<br>59<br>00<br>6  | 59/185/857/1311/1909/2702/2982/3357/5592/5743                                                   | 1<br>0 |
| B<br>P | G<br>O:<br>00                  | regulation of blood vessel diameter   | 10<br>/4<br>08 | 12<br>5/<br>17            | 0.0<br>00<br>58             | 0.0<br>06<br>28             | 0.0<br>04<br>59             | 59/185/857/1311/1909/2702/2982/3357/5592/5743                                                   | 1<br>0 |

|        |                                |                                                               |                |                           |                             |                             |                             |                                                                                 |        |
|--------|--------------------------------|---------------------------------------------------------------|----------------|---------------------------|-----------------------------|-----------------------------|-----------------------------|---------------------------------------------------------------------------------|--------|
|        | 97<br>74<br>6                  |                                                               |                | 91<br>3                   | 25<br>17                    | 28<br>64                    | 00<br>6                     |                                                                                 |        |
| B<br>P | G<br>O:<br>00<br>44<br>31<br>9 | wound healing,<br>spreading of cells                          | 5/<br>40<br>8  | 31<br>/1<br>79<br>13      | 0.0<br>00<br>62<br>35<br>43 | 0.0<br>06<br>64<br>93<br>59 | 0.0<br>04<br>85<br>78<br>1  | 1289/2316/3678/10630/90102                                                      | 5      |
| B<br>P | G<br>O:<br>00<br>86<br>01<br>1 | membrane<br>repolarization during<br>action potential         | 5/<br>40<br>8  | 31<br>/1<br>79<br>13      | 0.0<br>00<br>62<br>35<br>43 | 0.0<br>06<br>64<br>93<br>59 | 0.0<br>04<br>85<br>78<br>1  | 781/857/2316/23704/3764                                                         | 5      |
| B<br>P | G<br>O:<br>00<br>90<br>50<br>5 | epiboly involved in<br>wound healing                          | 5/<br>40<br>8  | 31<br>/1<br>79<br>13      | 0.0<br>00<br>62<br>35<br>43 | 0.0<br>06<br>64<br>93<br>59 | 0.0<br>04<br>85<br>78<br>1  | 1289/2316/3678/10630/90102                                                      | 5      |
| B<br>P | G<br>O:<br>00<br>99<br>62<br>5 | ventricular cardiac<br>muscle cell membrane<br>repolarization | 5/<br>40<br>8  | 31<br>/1<br>79<br>13      | 0.0<br>00<br>62<br>35<br>43 | 0.0<br>06<br>64<br>93<br>59 | 0.0<br>04<br>85<br>78<br>1  | 781/2702/23704/3764/6330                                                        | 5      |
| B<br>P | G<br>O:<br>00<br>90<br>25<br>7 | regulation of muscle<br>system process                        | 15<br>/4<br>08 | 25<br>1/<br>17<br>91<br>3 | 0.0<br>00<br>66<br>92<br>34 | 0.0<br>07<br>11<br>65<br>02 | 0.0<br>05<br>19<br>90<br>9  | 857/114907/2316/2702/2982/9464/3488/29995/10398/255743/5592/5743/5999/6781/7168 | 1<br>5 |
| B<br>P | G<br>O:<br>19<br>04<br>88<br>8 | cranial skeletal system<br>development                        | 7/<br>40<br>8  | 65<br>/1<br>79<br>13      | 0.0<br>00<br>67<br>43<br>53 | 0.0<br>07<br>15<br>07<br>92 | 0.0<br>05<br>22<br>41<br>41 | 2303/2737/5156/5396/7042/7043/7291                                              | 7      |

|        |                                |                                                                         |                |                           |                             |                             |                             |                                                              |        |
|--------|--------------------------------|-------------------------------------------------------------------------|----------------|---------------------------|-----------------------------|-----------------------------|-----------------------------|--------------------------------------------------------------|--------|
| B<br>P | G<br>O:<br>00<br>48<br>70<br>4 | embryonic skeletal<br>system morphogenesis                              | 8/<br>40<br>8  | 85<br>/1<br>79<br>13      | 0.0<br>00<br>70<br>48<br>29 | 0.0<br>07<br>45<br>30<br>23 | 0.0<br>05<br>44<br>49<br>41 | 1301/2138/2303/2737/5156/5396/7043/7291                      | 8      |
| B<br>P | G<br>O:<br>00<br>55<br>01<br>7 | cardiac muscle tissue<br>growth                                         | 9/<br>40<br>8  | 10<br>6/<br>17<br>91<br>3 | 0.0<br>00<br>70<br>79<br>58 | 0.0<br>07<br>46<br>51<br>98 | 0.0<br>05<br>45<br>38<br>36 | 2260/2303/2627/3776/5999/26011/7042/7472/23414               | 9      |
| B<br>P | G<br>O:<br>00<br>40<br>03<br>6 | regulation of fibroblast<br>growth factor receptor<br>signaling pathway | 5/<br>40<br>8  | 32<br>/1<br>79<br>13      | 0.0<br>00<br>72<br>53<br>44 | 0.0<br>07<br>56<br>40<br>19 | 0.0<br>05<br>52<br>60<br>31 | 90993/56975/23213/55959/7057                                 | 5      |
| B<br>P | G<br>O:<br>00<br>60<br>31<br>7 | cardiac epithelial to<br>mesenchymal transition                         | 5/<br>40<br>8  | 32<br>/1<br>79<br>13      | 0.0<br>00<br>72<br>53<br>44 | 0.0<br>07<br>56<br>40<br>19 | 0.0<br>05<br>52<br>60<br>31 | 3037/6591/7042/7291/7472                                     | 5      |
| B<br>P | G<br>O:<br>00<br>71<br>29<br>5 | cellular response to<br>vitamin                                         | 5/<br>40<br>8  | 32<br>/1<br>79<br>13      | 0.0<br>00<br>72<br>53<br>44 | 0.0<br>07<br>56<br>40<br>19 | 0.0<br>05<br>52<br>60<br>31 | 1277/2621/10631/6591/3371                                    | 5      |
| B<br>P | G<br>O:<br>00<br>90<br>50<br>4 | epiboly                                                                 | 5/<br>40<br>8  | 32<br>/1<br>79<br>13      | 0.0<br>00<br>72<br>53<br>44 | 0.0<br>07<br>56<br>40<br>19 | 0.0<br>05<br>52<br>60<br>31 | 1289/2316/3678/10630/90102                                   | 5      |
| B<br>P | G<br>O:<br>19                  | carbohydrate derivative<br>catabolic process                            | 12<br>/4<br>08 | 17<br>6/<br>17            | 0.0<br>00<br>72             | 0.0<br>07<br>56             | 0.0<br>05<br>52             | 81792/633/1464/1634/2331/2239/10082/4060/4958/5549/6383/1462 | 1<br>2 |

|        |                                |                                                       |                |                           |                             |                             |                             |                                                                                                     |        |
|--------|--------------------------------|-------------------------------------------------------|----------------|---------------------------|-----------------------------|-----------------------------|-----------------------------|-----------------------------------------------------------------------------------------------------|--------|
|        | 01<br>13<br>6                  |                                                       |                | 91<br>3                   | 74<br>02                    | 45<br>76                    | 64<br>38                    |                                                                                                     |        |
| B<br>P | G<br>O:<br>19<br>01<br>86<br>1 | regulation of muscle<br>tissue development            | 11<br>/4<br>08 | 15<br>2/<br>17<br>91<br>3 | 0.0<br>00<br>73<br>38<br>47 | 0.0<br>07<br>60<br>66<br>32 | 0.0<br>05<br>55<br>71<br>63 | 2260/2627/26585/3488/57158/3776/4015/5999/7291/7472/23414                                           | 1<br>1 |
| B<br>P | G<br>O:<br>00<br>60<br>38<br>9 | pathway-restricted<br>SMAD protein<br>phosphorylation | 6/<br>40<br>8  | 48<br>/1<br>79<br>13      | 0.0<br>00<br>73<br>54<br>76 | 0.0<br>07<br>60<br>66<br>32 | 0.0<br>05<br>55<br>71<br>63 | 11117/26585/3624/56937/7042/7043                                                                    | 6      |
| B<br>P | G<br>O:<br>00<br>60<br>67<br>5 | ureteric bud<br>morphogenesis                         | 7/<br>40<br>8  | 66<br>/1<br>79<br>13      | 0.0<br>00<br>73<br>98<br>39 | 0.0<br>07<br>61<br>00<br>6  | 0.0<br>05<br>55<br>96<br>67 | 170690/2138/2737/26585/55083/255743/7490                                                            | 7      |
| B<br>P | G<br>O:<br>19<br>03<br>67<br>2 | positive regulation of<br>sprouting angiogenesis      | 7/<br>40<br>8  | 66<br>/1<br>79<br>13      | 0.0<br>00<br>73<br>98<br>39 | 0.0<br>07<br>61<br>00<br>6  | 0.0<br>05<br>55<br>96<br>67 | 185/2303/3678/57608/10769/5743/27286                                                                | 7      |
| B<br>P | G<br>O:<br>00<br>36<br>29<br>3 | response to decreased<br>oxygen levels                | 19<br>/4<br>08 | 36<br>5/<br>17<br>91<br>3 | 0.0<br>00<br>75<br>13<br>15 | 0.0<br>07<br>70<br>71<br>04 | 0.0<br>05<br>63<br>05<br>65 | 9370/857/1410/6387/1909/2627/3776/4017/50507/5328/5352/10631/5740/5743/6781/<br>7042/7043/7057/7291 | 1<br>9 |
| B<br>P | G<br>O:<br>00<br>01<br>71<br>0 | mesodermal cell fate<br>commitment                    | 4/<br>40<br>8  | 19<br>/1<br>79<br>13      | 0.0<br>00<br>78<br>35<br>52 | 0.0<br>07<br>97<br>28<br>03 | 0.0<br>05<br>82<br>46<br>76 | 2138/2260/2303/6423                                                                                 | 4      |

|        |                                |                                                          |                |                           |                             |                             |                             |                                                                                                                   |        |
|--------|--------------------------------|----------------------------------------------------------|----------------|---------------------------|-----------------------------|-----------------------------|-----------------------------|-------------------------------------------------------------------------------------------------------------------|--------|
| B<br>P | G<br>O:<br>00<br>32<br>33<br>2 | positive regulation of<br>chondrocyte<br>differentiation | 4/<br>40<br>8  | 19<br>/1<br>79<br>13      | 0.0<br>00<br>78<br>35<br>52 | 0.0<br>07<br>97<br>28<br>03 | 0.0<br>05<br>82<br>46<br>76 | 658/2737/4017/91461                                                                                               | 4      |
| B<br>P | G<br>O:<br>00<br>60<br>97<br>3 | cell migration involved<br>in heart development          | 4/<br>40<br>8  | 19<br>/1<br>79<br>13      | 0.0<br>00<br>78<br>35<br>52 | 0.0<br>07<br>97<br>28<br>03 | 0.0<br>05<br>82<br>46<br>76 | 9464/5159/6591/7291                                                                                               | 4      |
| B<br>P | G<br>O:<br>00<br>46<br>68<br>3 | response to<br>organophosphorus                          | 10<br>/4<br>08 | 13<br>0/<br>17<br>91<br>3 | 0.0<br>00<br>79<br>15<br>12 | 0.0<br>08<br>03<br>21<br>41 | 0.0<br>05<br>86<br>80<br>27 | 9370/1277/3488/4327/50507/5139/5743/6678/6781/7490                                                                | 1<br>0 |
| B<br>P | G<br>O:<br>00<br>50<br>76<br>9 | positive regulation of<br>neurogenesis                   | 22<br>/4<br>08 | 45<br>5/<br>17<br>91<br>3 | 0.0<br>00<br>79<br>50<br>44 | 0.0<br>08<br>04<br>63<br>53 | 0.0<br>05<br>87<br>84<br>09 | 1272/6387/1809/2042/2260/2316/2335/2736/2737/3082/3976/4131/4915/5587/5789/5270/5176/11075/55714/26011/7077/22891 | 2<br>2 |
| B<br>P | G<br>O:<br>00<br>10<br>81<br>2 | negative regulation of<br>cell-substrate adhesion        | 7/<br>40<br>8  | 67<br>/1<br>79<br>13      | 0.0<br>00<br>81<br>02<br>55 | 0.0<br>08<br>15<br>65<br>68 | 0.0<br>05<br>95<br>89<br>29 | 1277/3956/90102/10631/5054/6695/7057                                                                              | 7      |
| B<br>P | G<br>O:<br>00<br>72<br>17<br>1 | mesonephric tubule<br>morphogenesis                      | 7/<br>40<br>8  | 67<br>/1<br>79<br>13      | 0.0<br>00<br>81<br>02<br>55 | 0.0<br>08<br>15<br>65<br>68 | 0.0<br>05<br>95<br>89<br>29 | 170690/2138/2737/26585/55083/255743/7490                                                                          | 7      |
| B<br>P | G<br>O:<br>00                  | regulation of collagen<br>metabolic process              | 6/<br>40<br>8  | 49<br>/1<br>79            | 0.0<br>00<br>82             | 0.0<br>08<br>23             | 0.0<br>06<br>01             | 90993/11117/2191/5159/7043/7431                                                                                   | 6      |

|        |                                |                                                                    |                |                           |                             |                             |                             |                                                                                      |        |
|--------|--------------------------------|--------------------------------------------------------------------|----------------|---------------------------|-----------------------------|-----------------------------|-----------------------------|--------------------------------------------------------------------------------------|--------|
|        | 10<br>71<br>2                  |                                                                    |                | 13                        | 22<br>4                     | 33<br>07                    | 49<br>92                    |                                                                                      |        |
| B<br>P | G<br>O:<br>20<br>01<br>23<br>8 | positive regulation of<br>extrinsic apoptotic<br>signaling pathway | 6/<br>40<br>8  | 49<br>/1<br>79<br>13      | 0.0<br>00<br>82<br>22<br>4  | 0.0<br>08<br>23<br>33<br>07 | 0.0<br>06<br>01<br>49<br>92 | 658/857/3624/8406/7057/7078                                                          | 6      |
| B<br>P | G<br>O:<br>00<br>03<br>33<br>8 | metanephros<br>morphogenesis                                       | 5/<br>40<br>8  | 33<br>/1<br>79<br>13      | 0.0<br>00<br>83<br>90<br>67 | 0.0<br>08<br>32<br>21<br>91 | 0.0<br>06<br>07<br>99<br>27 | 26585/55083/3976/5159/7490                                                           | 5      |
| B<br>P | G<br>O:<br>00<br>42<br>33<br>9 | keratan sulfate<br>metabolic process                               | 5/<br>40<br>8  | 33<br>/1<br>79<br>13      | 0.0<br>00<br>83<br>90<br>67 | 0.0<br>08<br>32<br>21<br>91 | 0.0<br>06<br>07<br>99<br>27 | 4166/2331/4060/4958/5549                                                             | 5      |
| B<br>P | G<br>O:<br>00<br>48<br>04<br>8 | embryonic eye<br>morphogenesis                                     | 5/<br>40<br>8  | 33<br>/1<br>79<br>13      | 0.0<br>00<br>83<br>90<br>67 | 0.0<br>08<br>32<br>21<br>91 | 0.0<br>06<br>07<br>99<br>27 | 220/2202/2200/4237/7291                                                              | 5      |
| B<br>P | G<br>O:<br>00<br>45<br>59<br>8 | regulation of fat cell<br>differentiation                          | 10<br>/4<br>08 | 13<br>/1<br>17<br>91<br>3 | 0.0<br>00<br>83<br>99<br>35 | 0.0<br>08<br>32<br>21<br>91 | 0.0<br>06<br>07<br>99<br>27 | 9370/5167/84935/4320/5743/5919/862/6423/6591/23414                                   | 1<br>0 |
| B<br>P | G<br>O:<br>00<br>03<br>01<br>5 | heart process                                                      | 16<br>/4<br>08 | 28<br>/4<br>17<br>91<br>3 | 0.0<br>00<br>84<br>56<br>89 | 0.0<br>08<br>35<br>72<br>68 | 0.0<br>06<br>10<br>55<br>54 | 10060/552/781/857/10699/2316/2702/23704/3764/50507/5999/6330/6444/6781/7042/<br>7168 | 1<br>6 |

|        |                                |                                                                   |                |                           |                             |                             |                             |                                                                                                              |        |
|--------|--------------------------------|-------------------------------------------------------------------|----------------|---------------------------|-----------------------------|-----------------------------|-----------------------------|--------------------------------------------------------------------------------------------------------------|--------|
| B<br>P | G<br>O:<br>00<br>52<br>54<br>7 | regulation of peptidase activity                                  | 20<br>/4<br>08 | 39<br>8/<br>17<br>91<br>3 | 0.0<br>00<br>85<br>18<br>84 | 0.0<br>08<br>39<br>65<br>09 | 0.0<br>06<br>13<br>42<br>22 | 3730/84168/857/1293/1410/1470/1893/2335/2621/3082/5118/5627/5743/5054/6423/6695/7057/7076/7077/7078          | 2<br>0 |
| B<br>P | G<br>O:<br>19<br>03<br>52<br>4 | positive regulation of blood circulation                          | 7/<br>40<br>8  | 68<br>/1<br>79<br>13      | 0.0<br>00<br>88<br>58<br>6  | 0.0<br>08<br>70<br>86<br>45 | 0.0<br>06<br>36<br>22<br>59 | 552/857/2702/5743/5999/7042/7168                                                                             | 7      |
| B<br>P | G<br>O:<br>00<br>60<br>04<br>8 | cardiac muscle contraction                                        | 10<br>/4<br>08 | 13<br>2/<br>17<br>91<br>3 | 0.0<br>00<br>89<br>07<br>67 | 0.0<br>08<br>73<br>41<br>41 | 0.0<br>06<br>38<br>08<br>85 | 781/857/2316/2702/23704/3764/6330/6444/6781/7168                                                             | 1<br>0 |
| B<br>P | G<br>O:<br>19<br>05<br>51<br>7 | macrophage migration                                              | 6/<br>40<br>8  | 50<br>/1<br>79<br>13      | 0.0<br>00<br>91<br>66<br>9  | 0.0<br>08<br>96<br>50<br>37 | 0.0<br>06<br>54<br>95<br>71 | 4345/1588/11117/5919/4920/7057                                                                               | 6      |
| B<br>P | G<br>O:<br>19<br>01<br>65<br>2 | response to peptide                                               | 23<br>/4<br>08 | 49<br>1/<br>17<br>91<br>3 | 0.0<br>00<br>93<br>33<br>95 | 0.0<br>09<br>10<br>48<br>23 | 0.0<br>06<br>65<br>16<br>93 | 88/9370/185/773/781/857/1277/6387/1759/5167/2200/2303/2690/3488/8660/4131/4313/4314/5743/5919/6678/7076/7431 | 2<br>3 |
| B<br>P | G<br>O:<br>00<br>10<br>00<br>2 | cardioblast differentiation                                       | 4/<br>40<br>8  | 20<br>/1<br>79<br>13      | 0.0<br>00<br>96<br>19<br>61 | 0.0<br>09<br>32<br>22<br>11 | 0.0<br>06<br>81<br>05<br>1  | 2627/26585/144165/7042                                                                                       | 4      |
| B<br>P | G<br>O:<br>00                  | positive regulation of transforming growth factor beta production | 4/<br>40<br>8  | 20<br>/1<br>79            | 0.0<br>00<br>96             | 0.0<br>09<br>32             | 0.0<br>06<br>81             | 4345/4060/5743/7057                                                                                          | 4      |

|        |                                |                                                                        |               |                      |                                   |                                  |                             |                                          |   |
|--------|--------------------------------|------------------------------------------------------------------------|---------------|----------------------|-----------------------------------|----------------------------------|-----------------------------|------------------------------------------|---|
|        | 71<br>63<br>6                  |                                                                        |               | 13                   | 19<br>61                          | 22<br>11                         | 05<br>1                     |                                          |   |
| B<br>P | G<br>O:<br>00<br>07<br>43<br>5 | salivary gland<br>morphogenesis                                        | 5/<br>40<br>8 | 34<br>/1<br>79<br>13 | 0.0<br>00<br>96<br>55<br>59       | 0.0<br>09<br>32<br>22<br>11      | 0.0<br>06<br>81<br>05<br>1  | 2260/3082/6591/7042/7043                 | 5 |
| B<br>P | G<br>O:<br>00<br>60<br>79<br>5 | cell fate commitment<br>involved in formation of<br>primary germ layer | 5/<br>40<br>8 | 34<br>/1<br>79<br>13 | 0.0<br>00<br>96<br>55<br>59       | 0.0<br>09<br>32<br>22<br>11      | 0.0<br>06<br>81<br>05<br>1  | 2138/2260/2303/2627/6423                 | 5 |
| B<br>P | G<br>O:<br>00<br>45<br>66<br>8 | negative regulation of<br>osteoblast<br>differentiation                | 6/<br>40<br>8 | 51<br>/1<br>79<br>13 | 0.0<br>01<br>09<br>01<br>92<br>72 | 0.0<br>09<br>07<br>15<br>27<br>2 | 0.0<br>07<br>15<br>27<br>88 | 8313/26585/9464/3488/63923/7291          | 6 |
| B<br>P | G<br>O:<br>00<br>72<br>13<br>2 | mesenchyme<br>morphogenesis                                            | 6/<br>40<br>8 | 51<br>/1<br>79<br>13 | 0.0<br>01<br>01<br>92<br>72       | 0.0<br>09<br>07<br>15<br>27<br>2 | 0.0<br>07<br>15<br>27<br>88 | 59/2260/2303/6591/7042/7291              | 6 |
| B<br>P | G<br>O:<br>00<br>34<br>33<br>3 | adherens junction<br>assembly                                          | 8/<br>40<br>8 | 90<br>/1<br>79<br>13 | 0.0<br>01<br>02<br>89<br>37       | 0.0<br>09<br>08<br>35<br>08      | 0.0<br>07<br>18<br>40<br>47 | 88/1307/2042/10979/26585/90102/7057/7070 | 8 |
| B<br>P | G<br>O:<br>19<br>01<br>88<br>8 | regulation of cell<br>junction assembly                                | 8/<br>40<br>8 | 90<br>/1<br>79<br>13 | 0.0<br>01<br>02<br>89<br>37       | 0.0<br>09<br>08<br>35<br>08      | 0.0<br>07<br>18<br>40<br>47 | 857/1307/2042/26585/90102/6591/7057/7070 | 8 |



|        |                                |                                                           |                |                           |                             |                             |                             |                                                                                                   |        |
|--------|--------------------------------|-----------------------------------------------------------|----------------|---------------------------|-----------------------------|-----------------------------|-----------------------------|---------------------------------------------------------------------------------------------------|--------|
| B<br>P | G<br>O:<br>00<br>06<br>79<br>0 | sulfur compound<br>metabolic process                      | 18<br>/4<br>08 | 34<br>6/<br>17<br>91<br>3 | 0.0<br>01<br>03<br>34<br>49 | 0.0<br>09<br>85<br>16<br>89 | 0.0<br>07<br>19<br>73<br>3  | 633/23743/4166/1464/1634/29940/92126/5167/2331/2687/2690/4060/50507/4958/906<br>0/5549/1462/64131 | 1<br>8 |
| B<br>P | G<br>O:<br>00<br>07<br>60<br>1 | visual perception                                         | 13<br>/4<br>08 | 20<br>9/<br>17<br>91<br>3 | 0.0<br>01<br>04<br>38<br>71 | 0.0<br>09<br>92<br>59<br>78 | 0.0<br>07<br>25<br>16<br>03 | 1301/1277/1545/2202/2070/2743/83872/4060/4942/93145/25769/7045/7078                               | 1<br>3 |
| B<br>P | G<br>O:<br>00<br>01<br>81<br>8 | negative regulation of<br>cytokine production             | 16<br>/4<br>08 | 29<br>0/<br>17<br>91<br>3 | 0.0<br>01<br>05<br>41<br>43 | 0.0<br>09<br>99<br>84<br>67 | 0.0<br>07<br>30<br>45<br>61 | 9370/558/4345/2260/2335/2621/2627/3082/3624/2615/89795/284297/7042/7043/7057<br>/7291             | 1<br>6 |
| B<br>P | G<br>O:<br>00<br>50<br>95<br>4 | sensory perception of<br>mechanical stimulus              | 11<br>/4<br>08 | 15<br>9/<br>17<br>91<br>3 | 0.0<br>01<br>06<br>33<br>73 | 0.0<br>10<br>06<br>07<br>31 | 0.0<br>07<br>35<br>00<br>49 | 1301/1277/6387/2138/2070/2260/125336/63895/4919/5270/6591                                         | 1<br>1 |
| B<br>P | G<br>O:<br>00<br>45<br>92<br>3 | positive regulation of<br>fatty acid metabolic<br>process | 5/<br>40<br>8  | 35<br>/1<br>79<br>13      | 0.0<br>01<br>10<br>56<br>85 | 0.0<br>10<br>40<br>88<br>79 | 0.0<br>07<br>60<br>43<br>95 | 9370/552/8660/5743/7291                                                                           | 5      |
| B<br>P | G<br>O:<br>01<br>10<br>11<br>1 | negative regulation of<br>animal organ<br>morphogenesis   | 5/<br>40<br>8  | 35<br>/1<br>79<br>13      | 0.0<br>01<br>10<br>56<br>85 | 0.0<br>10<br>40<br>88<br>79 | 0.0<br>07<br>60<br>43<br>95 | 54829/2303/26585/23213/7042                                                                       | 5      |
| B<br>P | G<br>O:<br>00                  | stem cell differentiation                                 | 14<br>/4<br>08 | 23<br>7/<br>17            | 0.0<br>01<br>11             | 0.0<br>10<br>50             | 0.0<br>07<br>67             | 1909/2335/2303/2627/26585/9464/3357/3976/8828/5156/144165/6591/7042/7291                          | 1<br>4 |

|        |                                |                                                                |               |                      |                             |                             |                             |                                 |   |
|--------|--------------------------------|----------------------------------------------------------------|---------------|----------------------|-----------------------------|-----------------------------|-----------------------------|---------------------------------|---|
|        | 48<br>86<br>3                  |                                                                |               | 91<br>3              | 89<br>56                    | 76<br>09                    | 65<br>25                    |                                 |   |
| B<br>P | G<br>O:<br>20<br>00<br>24<br>2 | negative regulation of<br>reproductive process                 | 6/<br>40<br>8 | 52<br>/1<br>79<br>13 | 0.0<br>01<br>13<br>04<br>45 | 0.0<br>10<br>58<br>91<br>59 | 0.0<br>07<br>73<br>61<br>02 | 3976/5176/23213/7076/7490/23414 | 6 |
| B<br>P | G<br>O:<br>00<br>03<br>09<br>4 | glomerular filtration                                          | 4/<br>40<br>8 | 21<br>/1<br>79<br>13 | 0.0<br>01<br>16<br>71<br>15 | 0.0<br>10<br>79<br>86<br>76 | 0.0<br>07<br>88<br>91<br>69 | 2621/2702/23213/55959           | 4 |
| B<br>P | G<br>O:<br>00<br>30<br>72<br>8 | ovulation                                                      | 4/<br>40<br>8 | 21<br>/1<br>79<br>13 | 0.0<br>01<br>16<br>71<br>15 | 0.0<br>10<br>79<br>86<br>76 | 0.0<br>07<br>88<br>91<br>69 | 3624/4327/5743/7130             | 4 |
| B<br>P | G<br>O:<br>00<br>71<br>71<br>1 | basement membrane<br>organization                              | 4/<br>40<br>8 | 21<br>/1<br>79<br>13 | 0.0<br>01<br>16<br>71<br>15 | 0.0<br>10<br>79<br>86<br>76 | 0.0<br>07<br>88<br>91<br>69 | 23768/4320/22795/90102          | 4 |
| B<br>P | G<br>O:<br>19<br>03<br>01<br>0 | regulation of bone<br>development                              | 4/<br>40<br>8 | 21<br>/1<br>79<br>13 | 0.0<br>01<br>16<br>71<br>15 | 0.0<br>10<br>79<br>86<br>76 | 0.0<br>07<br>88<br>91<br>69 | 2200/2737/26585/4015            | 4 |
| B<br>P | G<br>O:<br>19<br>03<br>05<br>5 | positive regulation of<br>extracellular matrix<br>organization | 4/<br>40<br>8 | 21<br>/1<br>79<br>13 | 0.0<br>01<br>16<br>71<br>15 | 0.0<br>10<br>79<br>86<br>76 | 0.0<br>07<br>88<br>91<br>69 | 4921/11117/10630/90102          | 4 |

|        |                                |                                                                 |                |                           |                             |                             |                             |                                                                     |        |
|--------|--------------------------------|-----------------------------------------------------------------|----------------|---------------------------|-----------------------------|-----------------------------|-----------------------------|---------------------------------------------------------------------|--------|
| B<br>P | G<br>O:<br>00<br>02<br>68<br>5 | regulation of leukocyte<br>migration                            | 12<br>/4<br>08 | 18<br>6/<br>17<br>91<br>3 | 0.0<br>01<br>17<br>75<br>13 | 0.0<br>10<br>86<br>82<br>46 | 0.0<br>07<br>93<br>99<br>94 | 4345/6387/1588/1893/11117/2621/26585/5919/5054/7057/7060/7070       | 1<br>2 |
| B<br>P | G<br>O:<br>00<br>50<br>95<br>3 | sensory perception of<br>light stimulus                         | 13<br>/4<br>08 | 21<br>3/<br>17<br>91<br>3 | 0.0<br>01<br>24<br>03<br>17 | 0.0<br>11<br>35<br>68<br>74 | 0.0<br>08<br>29<br>69<br>7  | 1301/1277/1545/2202/2070/2743/83872/4060/4942/93145/25769/7045/7078 | 1<br>3 |
| B<br>P | G<br>O:<br>00<br>97<br>19<br>1 | extrinsic apoptotic<br>signaling pathway                        | 13<br>/4<br>08 | 21<br>3/<br>17<br>91<br>3 | 0.0<br>01<br>24<br>03<br>17 | 0.0<br>11<br>35<br>68<br>74 | 0.0<br>08<br>29<br>69<br>7  | 658/857/2260/3082/3624/7857/5054/6423/6591/8406/7042/7057/7078      | 1<br>3 |
| B<br>P | G<br>O:<br>00<br>32<br>83<br>6 | glomerular basement<br>membrane<br>development                  | 3/<br>40<br>8  | 10<br>/1<br>79<br>13      | 0.0<br>01<br>24<br>94<br>06 | 0.0<br>11<br>35<br>68<br>74 | 0.0<br>08<br>29<br>69<br>7  | 23213/55959/7490                                                    | 3      |
| B<br>P | G<br>O:<br>00<br>33<br>62<br>9 | negative regulation of<br>cell adhesion mediated<br>by integrin | 3/<br>40<br>8  | 10<br>/1<br>79<br>13      | 0.0<br>01<br>24<br>94<br>06 | 0.0<br>11<br>35<br>68<br>74 | 0.0<br>08<br>29<br>69<br>7  | 1545/5054/6591                                                      | 3      |
| B<br>P | G<br>O:<br>00<br>60<br>34<br>6 | bone trabecula<br>formation                                     | 3/<br>40<br>8  | 10<br>/1<br>79<br>13      | 0.0<br>01<br>24<br>94<br>06 | 0.0<br>11<br>35<br>68<br>74 | 0.0<br>08<br>29<br>69<br>7  | 1277/26585/4313                                                     | 3      |
| B<br>P | G<br>O:<br>00                  | cartilage<br>morphogenesis                                      | 3/<br>40<br>8  | 10<br>/1<br>79            | 0.0<br>01<br>24             | 0.0<br>11<br>35             | 0.0<br>08<br>29             | 9464/6591/6781                                                      | 3      |

|        |                                |                                                               |                |                           |                             |                             |                             |                                                         |        |
|--------|--------------------------------|---------------------------------------------------------------|----------------|---------------------------|-----------------------------|-----------------------------|-----------------------------|---------------------------------------------------------|--------|
|        | 60<br>53<br>6                  |                                                               |                | 13                        | 94<br>06                    | 68<br>74                    | 69<br>7                     |                                                         |        |
| B<br>P | G<br>O:<br>00<br>44<br>34<br>4 | cellular response to fibroblast growth factor stimulus        | 10<br>/4<br>08 | 13<br>8/<br>17<br>91<br>3 | 0.0<br>01<br>25<br>15<br>12 | 0.0<br>11<br>35<br>68<br>74 | 0.0<br>08<br>29<br>69<br>7  | 3730/1277/90993/56975/2260/23768/10631/23213/55959/7057 | 1<br>0 |
| B<br>P | G<br>O:<br>19<br>05<br>52<br>1 | regulation of macrophage migration                            | 5/<br>40<br>8  | 36<br>/1<br>79<br>13      | 0.0<br>01<br>26<br>03<br>25 | 0.0<br>11<br>40<br>94<br>21 | 0.0<br>08<br>33<br>53<br>59 | 4345/1588/11117/5919/7057                               | 5      |
| B<br>P | G<br>O:<br>00<br>42<br>47<br>1 | ear morphogenesis                                             | 9/<br>40<br>8  | 11<br>5/<br>17<br>91<br>3 | 0.0<br>01<br>26<br>79<br>06 | 0.0<br>11<br>42<br>77<br>03 | 0.0<br>08<br>34<br>87<br>16 | 220/1301/115908/2138/2260/2736/5396/4920/7291           | 9      |
| B<br>P | G<br>O:<br>00<br>48<br>01<br>0 | vascular endothelial growth factor receptor signaling pathway | 8/<br>40<br>8  | 93<br>/1<br>79<br>13      | 0.0<br>01<br>27<br>44<br>54 | 0.0<br>11<br>42<br>77<br>03 | 0.0<br>08<br>34<br>87<br>16 | 558/11117/2303/3678/3690/8828/5587/23213                | 8      |
| B<br>P | G<br>O:<br>00<br>51<br>59<br>1 | response to cAMP                                              | 8/<br>40<br>8  | 93<br>/1<br>79<br>13      | 0.0<br>01<br>27<br>44<br>54 | 0.0<br>11<br>42<br>77<br>03 | 0.0<br>08<br>34<br>87<br>16 | 9370/1277/3488/4327/50507/6678/6781/7490                | 8      |
| B<br>P | G<br>O:<br>00<br>72<br>08<br>0 | nephron tubule development                                    | 8/<br>40<br>8  | 93<br>/1<br>79<br>13      | 0.0<br>01<br>27<br>44<br>54 | 0.0<br>11<br>42<br>77<br>03 | 0.0<br>08<br>34<br>87<br>16 | 170690/2138/2737/26585/55083/3976/255743/7490           | 8      |

|        |                                |                                          |                |                           |                             |                             |                             |                                                                                            |        |
|--------|--------------------------------|------------------------------------------|----------------|---------------------------|-----------------------------|-----------------------------|-----------------------------|--------------------------------------------------------------------------------------------|--------|
| B<br>P | G<br>O:<br>00<br>30<br>59<br>5 | leukocyte chemotaxis                     | 12<br>/4<br>08 | 18<br>8/<br>17<br>91<br>3 | 0.0<br>01<br>29<br>07<br>42 | 0.0<br>11<br>54<br>63<br>34 | 0.0<br>08<br>43<br>53<br>83 | 6356/6387/1588/9420/2621/26585/5919/7857/5054/7042/7057/7060                               | 1<br>2 |
| B<br>P | G<br>O:<br>00<br>51<br>60<br>4 | protein maturation                       | 18<br>/4<br>08 | 35<br>3/<br>17<br>91<br>3 | 0.0<br>01<br>29<br>45<br>15 | 0.0<br>11<br>55<br>27<br>05 | 0.0<br>08<br>44<br>00<br>38 | 9509/715/716/1066/3075/1311/10699/2619/2737/85409/5122/5125/5328/5627/5054/5270/10418/7057 | 1<br>8 |
| B<br>P | G<br>O:<br>00<br>31<br>63<br>9 | plasminogen activation                   | 4/<br>40<br>8  | 22<br>/1<br>79<br>13      | 0.0<br>01<br>40<br>10<br>57 | 0.0<br>12<br>38<br>63<br>94 | 0.0<br>09<br>04<br>91<br>05 | 5328/5054/5270/7057                                                                        | 4      |
| B<br>P | G<br>O:<br>00<br>33<br>62<br>2 | integrin activation                      | 4/<br>40<br>8  | 22<br>/1<br>79<br>13      | 0.0<br>01<br>40<br>10<br>57 | 0.0<br>12<br>38<br>63<br>94 | 0.0<br>09<br>04<br>91<br>05 | 1307/6387/10979/2335                                                                       | 4      |
| B<br>P | G<br>O:<br>00<br>45<br>64<br>9 | regulation of macrophage differentiation | 4/<br>40<br>8  | 22<br>/1<br>79<br>13      | 0.0<br>01<br>40<br>10<br>57 | 0.0<br>12<br>38<br>63<br>94 | 0.0<br>09<br>04<br>91<br>05 | 9370/3624/3976/4920                                                                        | 4      |
| B<br>P | G<br>O:<br>00<br>97<br>20<br>5 | renal filtration                         | 4/<br>40<br>8  | 22<br>/1<br>79<br>13      | 0.0<br>01<br>40<br>10<br>57 | 0.0<br>12<br>38<br>63<br>94 | 0.0<br>09<br>04<br>91<br>05 | 2621/2702/23213/55959                                                                      | 4      |
| B<br>P | G<br>O:<br>00                  | neural crest cell migration              | 5/<br>40<br>8  | 37<br>/1<br>79            | 0.0<br>01<br>43             | 0.0<br>12<br>49             | 0.0<br>09<br>13             | 2335/9464/3357/8828/7291                                                                   | 5      |

|        |                                |                                                                 |               |                      |                             |                             |                             |                                               |   |
|--------|--------------------------------|-----------------------------------------------------------------|---------------|----------------------|-----------------------------|-----------------------------|-----------------------------|-----------------------------------------------|---|
|        | 01<br>75<br>5                  |                                                                 |               | 13                   | 03<br>74                    | 92<br>2                     | 15<br>32                    |                                               |   |
| B<br>P | G<br>O:<br>00<br>01<br>99<br>0 | regulation of systemic<br>arterial blood pressure<br>by hormone | 5/<br>40<br>8 | 37<br>/1<br>79<br>13 | 0.0<br>01<br>43<br>03<br>74 | 0.0<br>12<br>49<br>92<br>2  | 0.0<br>09<br>13<br>15<br>32 | 185/1066/10699/2702/5125                      | 5 |
| B<br>P | G<br>O:<br>00<br>14<br>91<br>2 | negative regulation of<br>smooth muscle cell<br>migration       | 5/<br>40<br>8 | 37<br>/1<br>79<br>13 | 0.0<br>01<br>43<br>03<br>74 | 0.0<br>12<br>49<br>92<br>2  | 0.0<br>09<br>13<br>15<br>32 | 9370/3488/5592/5054/7168                      | 5 |
| B<br>P | G<br>O:<br>00<br>60<br>30<br>6 | regulation of membrane<br>repolarization                        | 5/<br>40<br>8 | 37<br>/1<br>79<br>13 | 0.0<br>01<br>43<br>03<br>74 | 0.0<br>12<br>49<br>92<br>2  | 0.0<br>09<br>13<br>15<br>32 | 781/857/2316/2702/6330                        | 5 |
| B<br>P | G<br>O:<br>19<br>05<br>31<br>4 | semi-lunar valve<br>development                                 | 5/<br>40<br>8 | 37<br>/1<br>79<br>13 | 0.0<br>01<br>43<br>03<br>74 | 0.0<br>12<br>49<br>92<br>2  | 0.0<br>09<br>13<br>15<br>32 | 11117/2702/6591/7042/7291                     | 5 |
| B<br>P | G<br>O:<br>00<br>42<br>47<br>2 | inner ear<br>morphogenesis                                      | 8/<br>40<br>8 | 95<br>/1<br>79<br>13 | 0.0<br>01<br>46<br>25<br>26 | 0.0<br>12<br>70<br>24<br>77 | 0.0<br>09<br>28<br>00<br>25 | 220/1301/115908/2138/2260/2736/5396/4920      | 8 |
| B<br>P | G<br>O:<br>00<br>61<br>32<br>6 | renal tubule<br>development                                     | 8/<br>40<br>8 | 95<br>/1<br>79<br>13 | 0.0<br>01<br>46<br>25<br>26 | 0.0<br>12<br>70<br>24<br>77 | 0.0<br>09<br>28<br>00<br>25 | 170690/2138/2737/26585/55083/3976/255743/7490 | 8 |

|        |                                |                                                                   |                |                           |                             |                             |                             |                                                                                                     |        |
|--------|--------------------------------|-------------------------------------------------------------------|----------------|---------------------------|-----------------------------|-----------------------------|-----------------------------|-----------------------------------------------------------------------------------------------------|--------|
| B<br>P | G<br>O:<br>00<br>86<br>00<br>1 | cardiac muscle cell<br>action potential                           | 7/<br>40<br>8  | 74<br>/1<br>79<br>13      | 0.0<br>01<br>46<br>37<br>29 | 0.0<br>12<br>70<br>24<br>77 | 0.0<br>09<br>28<br>00<br>25 | 781/857/2316/2702/23704/3764/6330                                                                   | 7      |
| B<br>P | G<br>O:<br>00<br>48<br>00<br>8 | platelet-derived growth<br>factor receptor<br>signaling pathway   | 6/<br>40<br>8  | 55<br>/1<br>79<br>13      | 0.0<br>01<br>52<br>02<br>35 | 0.0<br>13<br>16<br>25<br>81 | 0.0<br>09<br>61<br>61<br>62 | 9370/4015/56034/5156/5159/5157                                                                      | 6      |
| B<br>P | G<br>O:<br>00<br>31<br>10<br>0 | animal organ<br>regeneration                                      | 7/<br>40<br>8  | 75<br>/1<br>79<br>13      | 0.0<br>01<br>58<br>34<br>28 | 0.0<br>13<br>64<br>71<br>26 | 0.0<br>09<br>97<br>01<br>55 | 558/6387/2621/2737/3082/4837/55959                                                                  | 7      |
| B<br>P | G<br>O:<br>00<br>72<br>07<br>8 | nephron tubule<br>morphogenesis                                   | 7/<br>40<br>8  | 75<br>/1<br>79<br>13      | 0.0<br>01<br>58<br>34<br>28 | 0.0<br>13<br>64<br>71<br>26 | 0.0<br>09<br>97<br>01<br>55 | 170690/2138/2737/26585/55083/255743/7490                                                            | 7      |
| B<br>P | G<br>O:<br>00<br>43<br>68<br>7 | post-translational<br>protein modification                        | 18<br>/4<br>08 | 36<br>0/<br>17<br>91<br>3 | 0.0<br>01<br>60<br>96<br>4  | 0.0<br>13<br>83<br>94<br>14 | 0.0<br>10<br>11<br>06<br>35 | 83987/1000/56975/2200/114907/2335/11167/2621/3488/3490/3956/4148/54587/7857/<br>6383/7076/3371/1462 | 1<br>8 |
| B<br>P | G<br>O:<br>00<br>07<br>43<br>1 | salivary gland<br>development                                     | 5/<br>40<br>8  | 38<br>/1<br>79<br>13      | 0.0<br>01<br>61<br>67<br>37 | 0.0<br>13<br>83<br>94<br>14 | 0.0<br>10<br>11<br>06<br>35 | 2260/3082/6591/7042/7043                                                                            | 5      |
| B<br>P | G<br>O:<br>00                  | positive regulation of<br>cell migration involved<br>in sprouting | 5/<br>40<br>8  | 38<br>/1<br>79            | 0.0<br>01<br>61             | 0.0<br>13<br>83             | 0.0<br>10<br>11             | 2303/57608/10769/5743/27286                                                                         | 5      |

|        |                                |                                             |                |                           |                             |                             |                             |                                                                            |        |
|--------|--------------------------------|---------------------------------------------|----------------|---------------------------|-----------------------------|-----------------------------|-----------------------------|----------------------------------------------------------------------------|--------|
|        | 90<br>05<br>0                  | angiogenesis                                |                | 13                        | 67<br>37                    | 94<br>14                    | 06<br>35                    |                                                                            |        |
| B<br>P | G<br>O:<br>19<br>03<br>67<br>0 | regulation of sprouting<br>angiogenesis     | 10<br>/4<br>08 | 14<br>3/<br>17<br>91<br>3 | 0.0<br>01<br>63<br>60<br>45 | 0.0<br>13<br>97<br>30<br>09 | 0.0<br>10<br>20<br>82<br>35 | 185/90993/2303/3678/57608/4223/10769/5743/27286/7057                       | 1<br>0 |
| B<br>P | G<br>O:<br>00<br>71<br>52<br>6 | semaphorin-plexin<br>signaling pathway      | 4/<br>40<br>8  | 23<br>/1<br>79<br>13      | 0.0<br>01<br>66<br>58<br>2  | 0.0<br>14<br>07<br>52<br>2  | 0.0<br>10<br>28<br>29<br>07 | 2316/9464/8828/91584                                                       | 4      |
| B<br>P | G<br>O:<br>00<br>72<br>21<br>5 | regulation of<br>metanephros<br>development | 4/<br>40<br>8  | 23<br>/1<br>79<br>13      | 0.0<br>01<br>66<br>58<br>2  | 0.0<br>14<br>07<br>52<br>2  | 0.0<br>10<br>28<br>29<br>07 | 9370/3976/5159/7490                                                        | 4      |
| B<br>P | G<br>O:<br>00<br>60<br>04<br>7 | heart contraction                           | 15<br>/4<br>08 | 27<br>5/<br>17<br>91<br>3 | 0.0<br>01<br>67<br>30<br>05 | 0.0<br>14<br>07<br>52<br>2  | 0.0<br>10<br>28<br>29<br>07 | 10060/552/781/857/10699/2316/2702/23704/3764/5999/6330/6444/6781/7042/7168 | 1<br>5 |
| B<br>P | G<br>O:<br>00<br>06<br>81<br>3 | potassium ion transport                     | 12<br>/4<br>08 | 19<br>4/<br>17<br>91<br>3 | 0.0<br>01<br>68<br>57<br>33 | 0.0<br>14<br>07<br>52<br>2  | 0.0<br>10<br>28<br>29<br>07 | 10060/88/857/2316/2702/3764/3776/343450/259232/5999/25769/57419            | 1<br>2 |
| B<br>P | G<br>O:<br>00<br>31<br>09<br>9 | regeneration                                | 12<br>/4<br>08 | 19<br>4/<br>17<br>91<br>3 | 0.0<br>01<br>68<br>57<br>33 | 0.0<br>14<br>07<br>52<br>2  | 0.0<br>10<br>28<br>29<br>07 | 558/6387/2621/2737/3082/4131/4837/10631/5396/55959/7070/3371               | 1<br>2 |



|        |                                |                                                                 |               |                      |                             |                            |                             |                                     |   |
|--------|--------------------------------|-----------------------------------------------------------------|---------------|----------------------|-----------------------------|----------------------------|-----------------------------|-------------------------------------|---|
| B<br>P | G<br>O:<br>00<br>10<br>75<br>5 | regulation of<br>plasminogen activation                         | 3/<br>40<br>8 | 11<br>/1<br>79<br>13 | 0.0<br>01<br>68<br>90<br>26 | 0.0<br>14<br>07<br>52<br>2 | 0.0<br>10<br>28<br>29<br>07 | 5054/5270/7057                      | 3 |
| B<br>P | G<br>O:<br>00<br>14<br>83<br>1 | gastro-intestinal system<br>smooth muscle<br>contraction        | 3/<br>40<br>8 | 11<br>/1<br>79<br>13 | 0.0<br>01<br>68<br>90<br>26 | 0.0<br>14<br>07<br>52<br>2 | 0.0<br>10<br>28<br>29<br>07 | 3357/23213/55959                    | 3 |
| B<br>P | G<br>O:<br>00<br>32<br>90<br>8 | regulation of<br>transforming growth<br>factor beta1 production | 3/<br>40<br>8 | 11<br>/1<br>79<br>13 | 0.0<br>01<br>68<br>90<br>26 | 0.0<br>14<br>07<br>52<br>2 | 0.0<br>10<br>28<br>29<br>07 | 2627/4060/7057                      | 3 |
| B<br>P | G<br>O:<br>00<br>97<br>04<br>8 | dendritic cell apoptotic<br>process                             | 3/<br>40<br>8 | 11<br>/1<br>79<br>13 | 0.0<br>01<br>68<br>90<br>26 | 0.0<br>14<br>07<br>52<br>2 | 0.0<br>10<br>28<br>29<br>07 | 558/6387/2621                       | 3 |
| B<br>P | G<br>O:<br>19<br>01<br>20<br>1 | regulation of<br>extracellular matrix<br>assembly               | 3/<br>40<br>8 | 11<br>/1<br>79<br>13 | 0.0<br>01<br>68<br>90<br>26 | 0.0<br>14<br>07<br>52<br>2 | 0.0<br>10<br>28<br>29<br>07 | 84168/11117/3037                    | 3 |
| B<br>P | G<br>O:<br>20<br>00<br>66<br>8 | regulation of dendritic<br>cell apoptotic process               | 3/<br>40<br>8 | 11<br>/1<br>79<br>13 | 0.0<br>01<br>68<br>90<br>26 | 0.0<br>14<br>07<br>52<br>2 | 0.0<br>10<br>28<br>29<br>07 | 558/6387/2621                       | 3 |
| B<br>P | G<br>O:<br>00                  | muscle tissue<br>morphogenesis                                  | 7/<br>40<br>8 | 76<br>/1<br>79       | 0.0<br>01<br>71             | 0.0<br>14<br>22            | 0.0<br>10<br>39             | 1301/1281/2303/7042/7168/7472/23414 | 7 |

|        |                                |                                                            |                |                           |                             |                             |                             |                                                    |        |
|--------|--------------------------------|------------------------------------------------------------|----------------|---------------------------|-----------------------------|-----------------------------|-----------------------------|----------------------------------------------------|--------|
|        | 60<br>41<br>5                  |                                                            |                | 13                        | 06<br>11                    | 36<br>92                    | 13<br>76                    |                                                    |        |
| B<br>P | G<br>O:<br>00<br>45<br>83<br>4 | positive regulation of<br>lipid metabolic process          | 10<br>/4<br>08 | 14<br>4/<br>17<br>91<br>3 | 0.0<br>01<br>72<br>33<br>73 | 0.0<br>14<br>29<br>83<br>15 | 0.0<br>10<br>44<br>58<br>94 | 9370/185/552/3357/8660/5156/5159/5587/5743/7291    | 1<br>0 |
| B<br>P | G<br>O:<br>00<br>14<br>07<br>4 | response to<br>purine-containing<br>compound               | 10<br>/4<br>08 | 14<br>5/<br>17<br>91<br>3 | 0.0<br>01<br>81<br>44<br>37 | 0.0<br>14<br>97<br>11<br>1  | 0.0<br>10<br>93<br>74<br>16 | 9370/1277/3488/4327/50507/5139/5743/6678/6781/7490 | 1<br>0 |
| B<br>P | G<br>O:<br>00<br>30<br>04<br>9 | muscle filament sliding                                    | 5/<br>40<br>8  | 39<br>/1<br>79<br>13      | 0.0<br>01<br>82<br>03<br>28 | 0.0<br>14<br>97<br>11<br>1  | 0.0<br>10<br>93<br>74<br>16 | 88/4620/7168/7169/7431                             | 5      |
| B<br>P | G<br>O:<br>00<br>33<br>27<br>5 | actin-myosin filament<br>sliding                           | 5/<br>40<br>8  | 39<br>/1<br>79<br>13      | 0.0<br>01<br>82<br>03<br>28 | 0.0<br>14<br>97<br>11<br>1  | 0.0<br>10<br>93<br>74<br>16 | 88/4620/7168/7169/7431                             | 5      |
| B<br>P | G<br>O:<br>20<br>00<br>82<br>6 | regulation of heart<br>morphogenesis                       | 5/<br>40<br>8  | 39<br>/1<br>79<br>13      | 0.0<br>01<br>82<br>03<br>28 | 0.0<br>14<br>97<br>11<br>1  | 0.0<br>10<br>93<br>74<br>16 | 2138/2303/9464/7042/7291                           | 5      |
| B<br>P | G<br>O:<br>00<br>60<br>68<br>8 | regulation of<br>morphogenesis of a<br>branching structure | 6/<br>40<br>8  | 57<br>/1<br>79<br>13      | 0.0<br>01<br>83<br>18<br>7  | 0.0<br>15<br>00<br>06<br>73 | 0.0<br>10<br>95<br>90<br>14 | 2260/26585/3082/6591/23213/7472                    | 6      |

|        |                                |                                                                                         |                |                           |                             |                             |                             |                                                                     |        |
|--------|--------------------------------|-----------------------------------------------------------------------------------------|----------------|---------------------------|-----------------------------|-----------------------------|-----------------------------|---------------------------------------------------------------------|--------|
| B<br>P | G<br>O:<br>19<br>02<br>04<br>1 | regulation of extrinsic<br>apoptotic signaling<br>pathway via death<br>domain receptors | 6/<br>40<br>8  | 57<br>/1<br>79<br>13      | 0.0<br>01<br>83<br>18<br>7  | 0.0<br>15<br>00<br>06<br>73 | 0.0<br>10<br>95<br>90<br>14 | 658/3082/5054/6423/7057/7078                                        | 6      |
| B<br>P | G<br>O:<br>19<br>02<br>90<br>4 | negative regulation of<br>supramolecular fiber<br>organization                          | 9/<br>40<br>8  | 12<br>2/<br>17<br>91<br>3 | 0.0<br>01<br>91<br>42<br>07 | 0.0<br>15<br>64<br>09<br>79 | 0.0<br>11<br>42<br>68<br>01 | 1410/11117/80206/4131/91663/89795/90102/130271/11075                | 9      |
| B<br>P | G<br>O:<br>00<br>09<br>74<br>3 | response to<br>carbohydrate                                                             | 13<br>/4<br>08 | 22<br>4/<br>17            | 0.0<br>01<br>94<br>50<br>19 | 0.0<br>15<br>85<br>84<br>18 | 0.0<br>11<br>58<br>56<br>55 | 9370/55107/1292/81035/2621/8660/3956/4131/50507/5743/5176/6678/7057 | 1<br>3 |
| B<br>P | G<br>O:<br>00<br>46<br>69<br>7 | decidualization                                                                         | 4/<br>40<br>8  | 24<br>/1<br>79<br>13      | 0.0<br>01<br>96<br>34<br>22 | 0.0<br>15<br>93<br>96<br>08 | 0.0<br>11<br>64<br>49<br>7  | 3976/5740/5743/6781                                                 | 4      |
| B<br>P | G<br>O:<br>20<br>00<br>20<br>9 | regulation of anoikis                                                                   | 4/<br>40<br>8  | 24<br>/1<br>79<br>13      | 0.0<br>01<br>96<br>34<br>22 | 0.0<br>15<br>93<br>96<br>08 | 0.0<br>11<br>64<br>49<br>7  | 857/3678/4915/6591                                                  | 4      |
| B<br>P | G<br>O:<br>00<br>48<br>66<br>0 | regulation of smooth<br>muscle cell proliferation                                       | 11<br>/4<br>08 | 17<br>2/<br>17<br>91<br>3 | 0.0<br>01<br>99<br>72<br>7  | 0.0<br>16<br>17<br>96<br>02 | 0.0<br>11<br>82<br>03<br>02 | 9370/1012/3488/4313/4883/5159/5592/5743/7043/7057/7168              | 1<br>1 |
| B<br>P | G<br>O:<br>00                  | lung alveolus<br>development                                                            | 5/<br>40<br>8  | 40<br>/1<br>79            | 0.0<br>02<br>04             | 0.0<br>16<br>50             | 0.0<br>12<br>05             | 2627/3488/3976/91461/7043                                           | 5      |

|        |                                |                                                         |                |                           |                             |                             |                             |                                                        |        |
|--------|--------------------------------|---------------------------------------------------------|----------------|---------------------------|-----------------------------|-----------------------------|-----------------------------|--------------------------------------------------------|--------|
|        | 48<br>28<br>6                  |                                                         |                | 13                        | 20<br>73                    | 71<br>18                    | 95<br>75                    |                                                        |        |
| B<br>P | G<br>O:<br>00<br>61<br>33<br>3 | renal tubule<br>morphogenesis                           | 7/<br>40<br>8  | 79<br>/1<br>79<br>13      | 0.0<br>02<br>14<br>02<br>21 | 0.0<br>17<br>26<br>35<br>33 | 0.0<br>12<br>61<br>21<br>87 | 170690/2138/2737/26585/55083/255743/7490               | 7      |
| B<br>P | G<br>O:<br>00<br>02<br>04<br>2 | cell migration involved<br>in sprouting<br>angiogenesis | 8/<br>40<br>8  | 10<br>/1<br>17<br>91<br>3 | 0.0<br>02<br>16<br>17<br>29 | 0.0<br>17<br>36<br>28<br>23 | 0.0<br>12<br>68<br>47<br>26 | 2303/26585/57608/4223/10769/5743/27286/7057            | 8      |
| B<br>P | G<br>O:<br>00<br>55<br>02<br>4 | regulation of cardiac<br>muscle tissue<br>development   | 8/<br>40<br>8  | 10<br>/1<br>17<br>91<br>3 | 0.0<br>02<br>16<br>17<br>29 | 0.0<br>17<br>36<br>28<br>23 | 0.0<br>12<br>68<br>47<br>26 | 2260/2627/26585/57158/3776/5999/7472/23414             | 8      |
| B<br>P | G<br>O:<br>00<br>48<br>65<br>9 | smooth muscle cell<br>proliferation                     | 11<br>/4<br>08 | 17<br>4/<br>17<br>91<br>3 | 0.0<br>02<br>18<br>71<br>8  | 0.0<br>17<br>51<br>97<br>47 | 0.0<br>12<br>79<br>93<br>69 | 9370/1012/3488/4313/4883/5159/5592/5743/7043/7057/7168 | 1<br>1 |
| B<br>P | G<br>O:<br>00<br>09<br>88<br>6 | post-embryonic animal<br>morphogenesis                  | 3/<br>40<br>8  | 12<br>/1<br>79<br>13      | 0.0<br>02<br>21<br>41<br>84 | 0.0<br>17<br>51<br>97<br>47 | 0.0<br>12<br>79<br>93<br>69 | 2202/2200/4237                                         | 3      |
| B<br>P | G<br>O:<br>00<br>32<br>90<br>5 | transforming growth<br>factor beta1 production          | 3/<br>40<br>8  | 12<br>/1<br>79<br>13      | 0.0<br>02<br>21<br>41<br>84 | 0.0<br>17<br>51<br>97<br>47 | 0.0<br>12<br>79<br>93<br>69 | 2627/4060/7057                                         | 3      |

|        |                                |                                                                                 |                |                           |                             |                             |                             |                                                      |        |
|--------|--------------------------------|---------------------------------------------------------------------------------|----------------|---------------------------|-----------------------------|-----------------------------|-----------------------------|------------------------------------------------------|--------|
| B<br>P | G<br>O:<br>00<br>48<br>93<br>4 | peripheral nervous<br>system neuron<br>differentiation                          | 3/<br>40<br>8  | 12<br>/1<br>79<br>13      | 0.0<br>02<br>21<br>41<br>84 | 0.0<br>17<br>51<br>97<br>47 | 0.0<br>12<br>79<br>93<br>69 | 2115/9464/4915                                       | 3      |
| B<br>P | G<br>O:<br>00<br>48<br>93<br>5 | peripheral nervous<br>system neuron<br>development                              | 3/<br>40<br>8  | 12<br>/1<br>79<br>13      | 0.0<br>02<br>21<br>41<br>84 | 0.0<br>17<br>51<br>97<br>47 | 0.0<br>12<br>79<br>93<br>69 | 2115/9464/4915                                       | 3      |
| B<br>P | G<br>O:<br>00<br>60<br>39<br>4 | negative regulation of<br>pathway-restricted<br>SMAD protein<br>phosphorylation | 3/<br>40<br>8  | 12<br>/1<br>79<br>13      | 0.0<br>02<br>21<br>41<br>84 | 0.0<br>17<br>51<br>97<br>47 | 0.0<br>12<br>79<br>93<br>69 | 11117/26585/56937                                    | 3      |
| B<br>P | G<br>O:<br>19<br>05<br>52<br>2 | negative regulation of<br>macrophage migration                                  | 3/<br>40<br>8  | 12<br>/1<br>79<br>13      | 0.0<br>02<br>21<br>41<br>84 | 0.0<br>17<br>51<br>97<br>47 | 0.0<br>12<br>79<br>93<br>69 | 4345/1588/11117                                      | 3      |
| B<br>P | G<br>O:<br>00<br>16<br>20<br>2 | regulation of striated<br>muscle tissue<br>development                          | 10<br>/4<br>08 | 14<br>9/<br>17<br>91<br>3 | 0.0<br>02<br>21<br>83<br>94 | 0.0<br>17<br>51<br>97<br>47 | 0.0<br>12<br>79<br>93<br>69 | 2260/2627/26585/57158/3776/4015/5999/7291/7472/23414 | 1<br>0 |
| B<br>P | G<br>O:<br>00<br>90<br>18<br>4 | positive regulation of<br>kidney development                                    | 5/<br>40<br>8  | 41<br>/1<br>79<br>13      | 0.0<br>02<br>28<br>29       | 0.0<br>17<br>94<br>38<br>11 | 0.0<br>13<br>10<br>91<br>77 | 9370/26585/3976/5159/7490                            | 5      |
| B<br>P | G<br>O:<br>00                  | renal system process<br>involved in regulation of<br>systemic arterial blood    | 4/<br>40<br>8  | 25<br>/1<br>79            | 0.0<br>02<br>29             | 0.0<br>17<br>94             | 0.0<br>13<br>10             | 185/2621/2702/5125                                   | 4      |

|        |                                |                                                        |                |                           |                             |                             |                             |                                                                                    |        |
|--------|--------------------------------|--------------------------------------------------------|----------------|---------------------------|-----------------------------|-----------------------------|-----------------------------|------------------------------------------------------------------------------------|--------|
|        | 03<br>07<br>1                  | pressure                                               |                | 13                        | 58<br>57                    | 38<br>11                    | 91<br>77                    |                                                                                    |        |
| B<br>P | G<br>O:<br>00<br>44<br>06<br>2 | regulation of excretion                                | 4/<br>40<br>8  | 25<br>/1<br>79<br>13      | 0.0<br>02<br>29<br>58<br>57 | 0.0<br>17<br>94<br>38<br>11 | 0.0<br>13<br>10<br>91<br>77 | 185/552/10699/6781                                                                 | 4      |
| B<br>P | G<br>O:<br>00<br>60<br>56<br>1 | apoptotic process<br>involved in<br>morphogenesis      | 4/<br>40<br>8  | 25<br>/1<br>79<br>13      | 0.0<br>02<br>29<br>58<br>57 | 0.0<br>17<br>94<br>38<br>11 | 0.0<br>13<br>10<br>91<br>77 | 1410/2303/9464/7042                                                                | 4      |
| B<br>P | G<br>O:<br>00<br>60<br>74<br>0 | prostate gland<br>epithelium<br>morphogenesis          | 4/<br>40<br>8  | 25<br>/1<br>79<br>13      | 0.0<br>02<br>29<br>58<br>57 | 0.0<br>17<br>94<br>38<br>11 | 0.0<br>13<br>10<br>91<br>77 | 9420/2736/23213/3371                                                               | 4      |
| B<br>P | G<br>O:<br>00<br>42<br>06<br>3 | gliogenesis                                            | 15<br>/4<br>08 | 28<br>5/<br>17<br>91<br>3 | 0.0<br>02<br>36<br>28<br>95 | 0.0<br>18<br>42<br>96<br>02 | 0.0<br>13<br>46<br>40<br>8  | 1000/1464/2737/3953/3976/54587/4915/4919/4920/5270/26011/7042/10100/7431/228<br>91 | 1<br>5 |
| B<br>P | G<br>O:<br>00<br>01<br>65<br>8 | branching involved in<br>ureteric bud<br>morphogenesis | 6/<br>40<br>8  | 60<br>/1<br>79<br>13      | 0.0<br>02<br>38<br>71<br>17 | 0.0<br>18<br>54<br>59<br>83 | 0.0<br>13<br>54<br>91<br>04 | 170690/2138/2737/26585/255743/7490                                                 | 6      |
| B<br>P | G<br>O:<br>00<br>51<br>66<br>8 | localization within<br>membrane                        | 9/<br>40<br>8  | 12<br>6/<br>17<br>91<br>3 | 0.0<br>02<br>38<br>76<br>42 | 0.0<br>18<br>54<br>59<br>83 | 0.0<br>13<br>54<br>91<br>04 | 1012/1000/2316/2743/2239/10082/3690/9379/7070                                      | 9      |

|        |                                |                                                      |                |                           |                             |                             |                             |                                                                                                                         |        |
|--------|--------------------------------|------------------------------------------------------|----------------|---------------------------|-----------------------------|-----------------------------|-----------------------------|-------------------------------------------------------------------------------------------------------------------------|--------|
| B<br>P | G<br>O:<br>00<br>43<br>41<br>0 | positive regulation of<br>MAPK cascade               | 22<br>/4<br>08 | 49<br>9/<br>17<br>91<br>3 | 0.0<br>02<br>54<br>70<br>04 | 0.0<br>19<br>74<br>32<br>02 | 0.0<br>14<br>42<br>37<br>54 | 9590/114897/1000/1464/2260/2621/2690/9464/3082/3357/57608/3976/50507/255743/<br>4915/5156/5159/4920/7042/7043/7057/7077 | 2<br>2 |
| B<br>P | G<br>O:<br>00<br>34<br>11<br>3 | heterotypic cell-cell<br>adhesion                    | 6/<br>40<br>8  | 61<br>/1<br>79<br>13      | 0.0<br>02<br>59<br>76<br>98 | 0.0<br>19<br>97<br>21<br>21 | 0.0<br>14<br>59<br>09<br>95 | 9370/4345/3678/3690/91663/7070                                                                                          | 6      |
| B<br>P | G<br>O:<br>00<br>42<br>73<br>3 | embryonic digit<br>morphogenesis                     | 6/<br>40<br>8  | 61<br>/1<br>79<br>13      | 0.0<br>02<br>59<br>76<br>98 | 0.0<br>19<br>97<br>21<br>21 | 0.0<br>14<br>59<br>09<br>95 | 2736/2737/9464/4920/6423/7291                                                                                           | 6      |
| B<br>P | G<br>O:<br>00<br>51<br>89<br>3 | regulation of focal<br>adhesion assembly             | 6/<br>40<br>8  | 61<br>/1<br>79<br>13      | 0.0<br>02<br>59<br>76<br>98 | 0.0<br>19<br>97<br>21<br>21 | 0.0<br>14<br>59<br>09<br>95 | 1307/2042/26585/90102/7057/7070                                                                                         | 6      |
| B<br>P | G<br>O:<br>00<br>90<br>10<br>9 | regulation of<br>cell-substrate junction<br>assembly | 6/<br>40<br>8  | 61<br>/1<br>79<br>13      | 0.0<br>02<br>59<br>76<br>98 | 0.0<br>19<br>97<br>21<br>21 | 0.0<br>14<br>59<br>09<br>95 | 1307/2042/26585/90102/7057/7070                                                                                         | 6      |
| B<br>P | G<br>O:<br>00<br>10<br>72<br>1 | negative regulation of<br>cell development           | 16<br>/4<br>08 | 31<br>7/<br>17<br>91<br>3 | 0.0<br>02<br>61<br>12<br>84 | 0.0<br>20<br>03<br>57<br>67 | 0.0<br>14<br>63<br>74<br>93 | 1281/1809/2200/2737/3956/10769/5376/10631/5744/5999/6695/11075/7070/63923/74<br>31/22891                                | 1<br>6 |
| B<br>P | G<br>O:<br>00                  | axon development                                     | 20<br>/4<br>08 | 43<br>8/<br>17            | 0.0<br>02<br>64             | 0.0<br>20<br>04             | 0.0<br>14<br>64             | 3730/658/1009/6387/2042/2115/23768/2335/2736/2737/8660/4131/4685/8828/4915/9<br>1584/7070/3371/63923/10100              | 2<br>0 |

|        |                                |                                                             |               |                      |                             |                             |                             |                         |   |
|--------|--------------------------------|-------------------------------------------------------------|---------------|----------------------|-----------------------------|-----------------------------|-----------------------------|-------------------------|---|
|        | 61<br>56<br>4                  |                                                             |               | 91<br>3              | 51<br>55                    | 12<br>84                    | 15<br>24                    |                         |   |
| B<br>P | G<br>O:<br>00<br>02<br>05<br>3 | positive regulation of<br>mesenchymal cell<br>proliferation | 4/<br>40<br>8 | 26<br>/1<br>79<br>13 | 0.0<br>02<br>66<br>50<br>93 | 0.0<br>20<br>04<br>12<br>84 | 0.0<br>14<br>64<br>15<br>24 | 2260/8660/5396/7472     | 4 |
| B<br>P | G<br>O:<br>00<br>19<br>93<br>4 | cGMP-mediated<br>signaling                                  | 4/<br>40<br>8 | 26<br>/1<br>79<br>13 | 0.0<br>02<br>66<br>50<br>93 | 0.0<br>20<br>04<br>12<br>84 | 0.0<br>14<br>64<br>15<br>24 | 3357/5139/5592/7057     | 4 |
| B<br>P | G<br>O:<br>00<br>30<br>20<br>1 | heparan sulfate<br>proteoglycan metabolic<br>process        | 4/<br>40<br>8 | 26<br>/1<br>79<br>13 | 0.0<br>02<br>66<br>50<br>93 | 0.0<br>20<br>04<br>12<br>84 | 0.0<br>14<br>64<br>15<br>24 | 29940/23213/55959/64131 | 4 |
| B<br>P | G<br>O:<br>00<br>32<br>96<br>7 | positive regulation of<br>collagen biosynthetic<br>process  | 4/<br>40<br>8 | 26<br>/1<br>79<br>13 | 0.0<br>02<br>66<br>50<br>93 | 0.0<br>20<br>04<br>12<br>84 | 0.0<br>14<br>64<br>15<br>24 | 90993/5159/7043/7431    | 4 |
| B<br>P | G<br>O:<br>00<br>45<br>99<br>2 | negative regulation of<br>embryonic<br>development          | 4/<br>40<br>8 | 26<br>/1<br>79<br>13 | 0.0<br>02<br>66<br>50<br>93 | 0.0<br>20<br>04<br>12<br>84 | 0.0<br>14<br>64<br>15<br>24 | 1289/1290/6423/23213    | 4 |
| B<br>P | G<br>O:<br>00<br>50<br>91<br>9 | negative chemotaxis                                         | 4/<br>40<br>8 | 26<br>/1<br>79<br>13 | 0.0<br>02<br>66<br>50<br>93 | 0.0<br>20<br>04<br>12<br>84 | 0.0<br>14<br>64<br>15<br>24 | 23768/3690/8828/91584   | 4 |



|        |                                |                                                                          |                |                           |                             |                                  |                             |                                                                                                     |        |
|--------|--------------------------------|--------------------------------------------------------------------------|----------------|---------------------------|-----------------------------|----------------------------------|-----------------------------|-----------------------------------------------------------------------------------------------------|--------|
| B<br>P | G<br>O:<br>00<br>60<br>35<br>1 | cartilage development<br>involved in<br>enchondral bone<br>morphogenesis | 4/<br>40<br>8  | 26<br>/1<br>79<br>13      | 0.0<br>02<br>66<br>50<br>93 | 0.0<br>20<br>04<br>12<br>84      | 0.0<br>14<br>64<br>15<br>24 | 8313/1277/1311/6781                                                                                 | 4      |
| B<br>P | G<br>O:<br>19<br>03<br>79<br>2 | negative regulation of<br>anion transport                                | 4/<br>40<br>8  | 26<br>/1<br>79<br>13      | 0.0<br>02<br>66<br>50<br>93 | 0.0<br>20<br>04<br>12<br>84      | 0.0<br>14<br>64<br>15<br>24 | 8660/5999/6424/7057                                                                                 | 4      |
| B<br>P | G<br>O:<br>19<br>05<br>04<br>8 | regulation of<br>metallopeptidase<br>activity                            | 4/<br>40<br>8  | 26<br>/1<br>79<br>13      | 0.0<br>02<br>66<br>50<br>93 | 0.0<br>20<br>04<br>12<br>84      | 0.0<br>14<br>64<br>15<br>24 | 84168/7076/7077/7078                                                                                | 4      |
| B<br>P | G<br>O:<br>00<br>48<br>63<br>4 | regulation of muscle<br>organ development                                | 10<br>/4<br>08 | 15<br>3/<br>17<br>91<br>3 | 0.0<br>02<br>69<br>17<br>43 | 0.0<br>20<br>20<br>14<br>49      | 0.0<br>14<br>75<br>85<br>35 | 2260/2627/26585/57158/3776/4015/5999/7291/7472/23414                                                | 1<br>0 |
| B<br>P | G<br>O:<br>00<br>07<br>38<br>9 | pattern specification<br>process                                         | 19<br>/4<br>08 | 40<br>8/<br>17<br>91<br>3 | 0.0<br>02<br>69<br>97<br>27 | 0.0<br>20<br>14<br>22<br>11<br>7 | 0.0<br>14<br>77<br>29<br>42 | 8313/80114/658/2138/2260/2303/2736/2737/26585/9464/4223/8828/5125/4920/6423/<br>6781/9096/7472/7490 | 1<br>9 |
| B<br>P | G<br>O:<br>00<br>02<br>68<br>8 | regulation of leukocyte<br>chemotaxis                                    | 8/<br>40<br>8  | 10<br>5/<br>17<br>91<br>3 | 0.0<br>02<br>75<br>77<br>33 | 0.0<br>20<br>61<br>47<br>39      | 0.0<br>15<br>06<br>04<br>71 | 6387/1588/2621/26585/5919/5054/7057/7060                                                            | 8      |
| B<br>P | G<br>O:<br>00                  | keratinocyte<br>proliferation                                            | 5/<br>40<br>8  | 43<br>/1<br>79            | 0.0<br>02<br>82             | 0.0<br>20<br>74                  | 0.0<br>15<br>15             | 1012/3037/687/5587/6591                                                                             | 5      |

|        |                                |                                                          |               |                      |                             |                            |                             |                           |   |
|--------|--------------------------------|----------------------------------------------------------|---------------|----------------------|-----------------------------|----------------------------|-----------------------------|---------------------------|---|
|        | 43<br>61<br>6                  |                                                          |               | 13                   | 55<br>46                    | 50<br>2                    | 56<br>51                    |                           |   |
| B<br>P | G<br>O:<br>00<br>44<br>06<br>0 | regulation of endocrine<br>process                       | 5/<br>40<br>8 | 43<br>/1<br>79<br>13 | 0.0<br>02<br>82<br>55<br>46 | 0.0<br>20<br>74<br>50<br>2 | 0.0<br>15<br>15<br>56<br>51 | 185/114897/2260/2702/3624 | 5 |
| B<br>P | G<br>O:<br>00<br>60<br>44<br>3 | mammary gland<br>morphogenesis                           | 5/<br>40<br>8 | 43<br>/1<br>79<br>13 | 0.0<br>02<br>82<br>55<br>46 | 0.0<br>20<br>74<br>50<br>2 | 0.0<br>15<br>15<br>56<br>51 | 857/6356/2736/2737/3488   | 5 |
| B<br>P | G<br>O:<br>00<br>10<br>76<br>3 | positive regulation of<br>fibroblast migration           | 3/<br>40<br>8 | 13<br>/1<br>79<br>13 | 0.0<br>02<br>83<br>01<br>15 | 0.0<br>20<br>74<br>50<br>2 | 0.0<br>15<br>15<br>56<br>51 | 9590/4921/7057            | 3 |
| B<br>P | G<br>O:<br>00<br>31<br>95<br>3 | negative regulation of<br>protein<br>autophosphorylation | 3/<br>40<br>8 | 13<br>/1<br>79<br>13 | 0.0<br>02<br>83<br>01<br>15 | 0.0<br>20<br>74<br>50<br>2 | 0.0<br>15<br>15<br>56<br>51 | 9370/857/5167             | 3 |
| B<br>P | G<br>O:<br>00<br>51<br>91<br>7 | regulation of fibrinolysis                               | 3/<br>40<br>8 | 13<br>/1<br>79<br>13 | 0.0<br>02<br>83<br>01<br>15 | 0.0<br>20<br>74<br>50<br>2 | 0.0<br>15<br>15<br>56<br>51 | 2191/5054/7057            | 3 |
| B<br>P | G<br>O:<br>00<br>61<br>43<br>0 | bone trabecula<br>morphogenesis                          | 3/<br>40<br>8 | 13<br>/1<br>79<br>13 | 0.0<br>02<br>83<br>01<br>15 | 0.0<br>20<br>74<br>50<br>2 | 0.0<br>15<br>15<br>56<br>51 | 1277/26585/4313           | 3 |

|        |                                |                                                               |                |                           |                             |                             |                             |                                                                                                    |        |
|--------|--------------------------------|---------------------------------------------------------------|----------------|---------------------------|-----------------------------|-----------------------------|-----------------------------|----------------------------------------------------------------------------------------------------|--------|
| B<br>P | G<br>O:<br>00<br>98<br>90<br>3 | regulation of membrane repolarization during action potential | 3/<br>40<br>8  | 13<br>/1<br>79<br>13      | 0.0<br>02<br>83<br>01<br>15 | 0.0<br>20<br>74<br>50<br>2  | 0.0<br>15<br>15<br>56<br>51 | 781/857/2316                                                                                       | 3      |
| B<br>P | G<br>O:<br>19<br>03<br>96<br>0 | negative regulation of anion transmembrane transport          | 3/<br>40<br>8  | 13<br>/1<br>79<br>13      | 0.0<br>02<br>83<br>01<br>15 | 0.0<br>20<br>74<br>50<br>2  | 0.0<br>15<br>15<br>56<br>51 | 8660/5999/7057                                                                                     | 3      |
| B<br>P | G<br>O:<br>20<br>01<br>04<br>4 | regulation of integrin-mediated signaling pathway             | 3/<br>40<br>8  | 13<br>/1<br>79<br>13      | 0.0<br>02<br>83<br>01<br>15 | 0.0<br>20<br>74<br>50<br>2  | 0.0<br>15<br>15<br>56<br>51 | 2316/5587/7076                                                                                     | 3      |
| B<br>P | G<br>O:<br>00<br>90<br>06<br>6 | regulation of anatomical structure size                       | 20<br>/4<br>08 | 44<br>2/<br>17<br>91<br>3 | 0.0<br>02<br>93<br>28<br>76 | 0.0<br>21<br>45<br>66<br>01 | 0.0<br>15<br>67<br>55<br>09 | 59/88/185/857/6356/1311/6387/1909/80206/2335/2303/2702/2982/3357/4131/91663/130271/91584/5592/5743 | 2<br>0 |
| B<br>P | G<br>O:<br>00<br>31<br>96<br>0 | response to corticosteroid                                    | 10<br>/4<br>08 | 15<br>5/<br>17<br>91<br>3 | 0.0<br>02<br>95<br>69<br>83 | 0.0<br>21<br>59<br>11<br>2  | 0.0<br>15<br>77<br>37<br>85 | 9370/552/1277/114907/3490/687/5743/5176/6678/6781                                                  | 1<br>0 |
| B<br>P | G<br>O:<br>00<br>60<br>42<br>0 | regulation of heart growth                                    | 7/<br>40<br>8  | 84<br>/1<br>79<br>13      | 0.0<br>03<br>03<br>61<br>32 | 0.0<br>22<br>12<br>62<br>53 | 0.0<br>16<br>16<br>47<br>35 | 2260/2627/3776/5999/7472/7490/23414                                                                | 7      |
| B<br>P | G<br>O:<br>00                  | cardiac muscle tissue morphogenesis                           | 6/<br>40<br>8  | 63<br>/1<br>79            | 0.0<br>03<br>06             | 0.0<br>22<br>18             | 0.0<br>16<br>20             | 1301/2303/7042/7168/7472/23414                                                                     | 6      |

|        |                                |                                                                           |                |                           |                             |                             |                             |                                                        |        |
|--------|--------------------------------|---------------------------------------------------------------------------|----------------|---------------------------|-----------------------------|-----------------------------|-----------------------------|--------------------------------------------------------|--------|
|        | 55<br>00<br>8                  |                                                                           |                | 13                        | 03<br>11                    | 12<br>78                    | 49<br>35                    |                                                        |        |
| B<br>P | G<br>O:<br>00<br>03<br>08<br>1 | regulation of systemic<br>arterial blood pressure<br>by renin-angiotensin | 4/<br>40<br>8  | 27<br>/1<br>79<br>13      | 0.0<br>03<br>07<br>30<br>62 | 0.0<br>22<br>18<br>12<br>78 | 0.0<br>16<br>20<br>49<br>35 | 185/1066/2702/5125                                     | 4      |
| B<br>P | G<br>O:<br>00<br>03<br>14<br>8 | outflow tract septum<br>morphogenesis                                     | 4/<br>40<br>8  | 27<br>/1<br>79<br>13      | 0.0<br>03<br>07<br>30<br>62 | 0.0<br>22<br>18<br>12<br>78 | 0.0<br>16<br>20<br>49<br>35 | 2627/8828/7042/23414                                   | 4      |
| B<br>P | G<br>O:<br>00<br>10<br>71<br>4 | positive regulation of<br>collagen metabolic<br>process                   | 4/<br>40<br>8  | 27<br>/1<br>79<br>13      | 0.0<br>03<br>07<br>30<br>62 | 0.0<br>22<br>18<br>12<br>78 | 0.0<br>16<br>20<br>49<br>35 | 90993/5159/7043/7431                                   | 4      |
| B<br>P | G<br>O:<br>00<br>60<br>51<br>2 | prostate gland<br>morphogenesis                                           | 4/<br>40<br>8  | 27<br>/1<br>79<br>13      | 0.0<br>03<br>07<br>30<br>62 | 0.0<br>22<br>18<br>12<br>78 | 0.0<br>16<br>20<br>49<br>35 | 9420/2736/23213/3371                                   | 4      |
| B<br>P | G<br>O:<br>00<br>09<br>95<br>2 | anterior/posterior<br>pattern specification                               | 11<br>/4<br>08 | 18<br>2/<br>17<br>91<br>3 | 0.0<br>03<br>09<br>88<br>34 | 0.0<br>22<br>28<br>84<br>71 | 0.0<br>16<br>28<br>32<br>47 | 8313/2303/2736/2737/4223/5125/4920/6423/9096/7472/7490 | 1<br>1 |
| B<br>P | G<br>O:<br>00<br>60<br>07<br>1 | Wnt signaling pathway,<br>planar cell polarity<br>pathway                 | 8/<br>40<br>8  | 10<br>7/<br>17<br>91<br>3 | 0.0<br>03<br>10<br>01<br>97 | 0.0<br>22<br>28<br>84<br>71 | 0.0<br>16<br>28<br>32<br>47 | 115908/51339/2239/10082/144165/4919/4920/6423          | 8      |

|        |                                |                                                                        |                |                           |                             |                             |                             |                                                                         |        |
|--------|--------------------------------|------------------------------------------------------------------------|----------------|---------------------------|-----------------------------|-----------------------------|-----------------------------|-------------------------------------------------------------------------|--------|
| B<br>P | G<br>O:<br>00<br>30<br>22<br>5 | macrophage<br>differentiation                                          | 5/<br>40<br>8  | 44<br>/1<br>79<br>13      | 0.0<br>03<br>12<br>92<br>42 | 0.0<br>22<br>28<br>84<br>71 | 0.0<br>16<br>28<br>32<br>47 | 9370/3624/3976/4920/10100                                               | 5      |
| B<br>P | G<br>O:<br>00<br>32<br>96<br>5 | regulation of collagen<br>biosynthetic process                         | 5/<br>40<br>8  | 44<br>/1<br>79<br>13      | 0.0<br>03<br>12<br>92<br>42 | 0.0<br>22<br>28<br>84<br>71 | 0.0<br>16<br>28<br>32<br>47 | 90993/11117/5159/7043/7431                                              | 5      |
| B<br>P | G<br>O:<br>00<br>48<br>48<br>3 | autonomic nervous<br>system development                                | 5/<br>40<br>8  | 44<br>/1<br>79<br>13      | 0.0<br>03<br>12<br>92<br>42 | 0.0<br>22<br>28<br>84<br>71 | 0.0<br>16<br>28<br>32<br>47 | 1909/2335/9464/8828/91584                                               | 5      |
| B<br>P | G<br>O:<br>00<br>48<br>70<br>1 | embryonic cranial<br>skeleton<br>morphogenesis                         | 5/<br>40<br>8  | 44<br>/1<br>79<br>13      | 0.0<br>03<br>12<br>92<br>42 | 0.0<br>22<br>28<br>84<br>71 | 0.0<br>16<br>28<br>32<br>47 | 2303/5156/5396/7043/7291                                                | 5      |
| B<br>P | G<br>O:<br>00<br>60<br>39<br>3 | regulation of<br>pathway-restricted<br>SMAD protein<br>phosphorylation | 5/<br>40<br>8  | 44<br>/1<br>79<br>13      | 0.0<br>03<br>12<br>92<br>42 | 0.0<br>22<br>28<br>84<br>71 | 0.0<br>16<br>28<br>32<br>47 | 11117/26585/3624/56937/7043                                             | 5      |
| B<br>P | G<br>O:<br>00<br>10<br>97<br>6 | positive regulation of<br>neuron projection<br>development             | 14<br>/4<br>08 | 26<br>5/<br>17<br>91<br>3 | 0.0<br>03<br>15<br>01<br>08 | 0.0<br>22<br>39<br>48<br>36 | 0.0<br>16<br>36<br>09<br>54 | 1272/6387/1809/2042/2260/2335/3082/4131/4915/5587/5789/5176/11075/55714 | 1<br>4 |
| B<br>P | G<br>O:<br>00                  | regulation of cell<br>migration involved in<br>sprouting angiogenesis  | 7/<br>40<br>8  | 85<br>/1<br>79            | 0.0<br>03<br>24             | 0.0<br>23<br>02             | 0.0<br>16<br>82             | 2303/57608/4223/10769/5743/27286/7057                                   | 7      |

|        |                                |                                                              |                |                           |                             |                             |                             |                                                                                             |        |
|--------|--------------------------------|--------------------------------------------------------------|----------------|---------------------------|-----------------------------|-----------------------------|-----------------------------|---------------------------------------------------------------------------------------------|--------|
|        | 90<br>04<br>9                  |                                                              |                | 13                        | 53<br>52                    | 85<br>76                    | 39<br>44                    |                                                                                             |        |
| B<br>P | G<br>O:<br>00<br>07<br>01<br>5 | actin filament<br>organization                               | 16<br>/4<br>08 | 32<br>5/<br>17<br>91<br>3 | 0.0<br>03<br>33<br>50<br>21 | 0.0<br>23<br>62<br>04<br>58 | 0.0<br>17<br>25<br>63<br>54 | 88/6356/84952/6387/1809/80206/2316/91663/50507/27295/90102/130271/5999/7043/<br>7168/165904 | 1<br>6 |
| B<br>P | G<br>O:<br>00<br>10<br>46<br>3 | mesenchymal cell<br>proliferation                            | 5/<br>40<br>8  | 45<br>/1<br>79<br>13      | 0.0<br>03<br>45<br>57<br>74 | 0.0<br>24<br>13<br>25<br>03 | 0.0<br>17<br>63<br>04<br>38 | 2260/9464/8660/5396/7472                                                                    | 5      |
| B<br>P | G<br>O:<br>00<br>71<br>67<br>5 | regulation of<br>mononuclear cell<br>migration               | 5/<br>40<br>8  | 45<br>/1<br>79<br>13      | 0.0<br>03<br>45<br>57<br>74 | 0.0<br>24<br>13<br>25<br>03 | 0.0<br>17<br>63<br>04<br>38 | 6387/26585/5919/5054/7057                                                                   | 5      |
| B<br>P | G<br>O:<br>00<br>33<br>13<br>8 | positive regulation of<br>peptidyl-serine<br>phosphorylation | 7/<br>40<br>8  | 86<br>/1<br>79<br>13      | 0.0<br>03<br>46<br>53<br>98 | 0.0<br>24<br>13<br>25<br>03 | 0.0<br>17<br>63<br>04<br>38 | 857/2621/3976/4915/5587/5743/6423                                                           | 7      |
| B<br>P | G<br>O:<br>00<br>48<br>14<br>5 | regulation of fibroblast<br>proliferation                    | 7/<br>40<br>8  | 86<br>/1<br>79<br>13      | 0.0<br>03<br>46<br>53<br>98 | 0.0<br>24<br>13<br>25<br>03 | 0.0<br>17<br>63<br>04<br>38 | 4921/2335/2621/56034/5156/5159/7472                                                         | 7      |
| B<br>P | G<br>O:<br>00<br>08<br>54<br>3 | fibroblast growth factor<br>receptor signaling<br>pathway    | 8/<br>40<br>8  | 10<br>9/<br>17<br>91<br>3 | 0.0<br>03<br>47<br>48<br>63 | 0.0<br>24<br>13<br>25<br>03 | 0.0<br>17<br>63<br>04<br>38 | 3730/90993/56975/2260/23768/23213/55959/7057                                                | 8      |

|        |                                |                                                                       |                |                           |                             |                             |                             |                                                                                |        |
|--------|--------------------------------|-----------------------------------------------------------------------|----------------|---------------------------|-----------------------------|-----------------------------|-----------------------------|--------------------------------------------------------------------------------|--------|
| B<br>P | G<br>O:<br>00<br>48<br>59<br>3 | camera-type eye<br>morphogenesis                                      | 8/<br>40<br>8  | 10<br>9/<br>17<br>91<br>3 | 0.0<br>03<br>47<br>48<br>63 | 0.0<br>24<br>13<br>25<br>03 | 0.0<br>17<br>63<br>04<br>38 | 220/1295/1296/2737/55714/7070/7291/7472                                        | 8      |
| B<br>P | G<br>O:<br>00<br>90<br>17<br>5 | regulation of<br>establishment of planar<br>polarity                  | 8/<br>40<br>8  | 10<br>9/<br>17<br>91<br>3 | 0.0<br>03<br>47<br>48<br>63 | 0.0<br>24<br>13<br>25<br>03 | 0.0<br>17<br>63<br>04<br>38 | 115908/51339/2239/10082/144165/4919/4920/6423                                  | 8      |
| B<br>P | G<br>O:<br>00<br>32<br>95<br>6 | regulation of actin<br>cytoskeleton<br>organization                   | 15<br>/4<br>08 | 29<br>7/<br>17<br>91<br>3 | 0.0<br>03<br>48<br>68<br>14 | 0.0<br>24<br>13<br>25<br>03 | 0.0<br>17<br>63<br>04<br>38 | 88/6356/6387/2042/80206/2316/91663/50507/5156/5159/90102/130271/5999/7043/7168 | 1<br>5 |
| B<br>P | G<br>O:<br>00<br>10<br>00<br>1 | glial cell differentiation                                            | 12<br>/4<br>08 | 21<br>2/<br>17<br>91<br>3 | 0.0<br>03<br>50<br>33<br>38 | 0.0<br>24<br>13<br>25<br>03 | 0.0<br>17<br>63<br>04<br>38 | 1000/2737/3976/54587/4915/4919/4920/5270/26011/10100/7431/22891                | 1<br>2 |
| B<br>P | G<br>O:<br>00<br>33<br>68<br>8 | regulation of osteoblast<br>proliferation                             | 4/<br>40<br>8  | 28<br>/1<br>79<br>13      | 0.0<br>03<br>52<br>16<br>6  | 0.0<br>24<br>13<br>25<br>03 | 0.0<br>17<br>63<br>04<br>38 | 115908/26585/4883/63923                                                        | 4      |
| B<br>P | G<br>O:<br>00<br>50<br>97<br>4 | detection of mechanical<br>stimulus involved in<br>sensory perception | 4/<br>40<br>8  | 28<br>/1<br>79<br>13      | 0.0<br>03<br>52<br>16<br>6  | 0.0<br>24<br>13<br>25<br>03 | 0.0<br>17<br>63<br>04<br>38 | 1301/6387/63895/5270                                                           | 4      |
| B<br>P | G<br>O:<br>19                  | response to<br>angiotensin                                            | 4/<br>40<br>8  | 28<br>/1<br>79            | 0.0<br>03<br>52             | 0.0<br>24<br>13             | 0.0<br>17<br>63             | 88/185/857/5743                                                                | 4      |

|        |                                |                                                                      |               |                      |                             |                             |                             |                 |   |
|--------|--------------------------------|----------------------------------------------------------------------|---------------|----------------------|-----------------------------|-----------------------------|-----------------------------|-----------------|---|
|        | 90<br>77<br>6                  |                                                                      |               | 13                   | 16<br>6                     | 25<br>03                    | 04<br>38                    |                 |   |
| B<br>P | G<br>O:<br>00<br>07<br>50<br>1 | mesodermal cell fate<br>specification                                | 3/<br>40<br>8 | 14<br>/1<br>79<br>13 | 0.0<br>03<br>54<br>15<br>65 | 0.0<br>24<br>13<br>25<br>03 | 0.0<br>17<br>63<br>04<br>38 | 2138/2260/6423  | 3 |
| B<br>P | G<br>O:<br>00<br>10<br>93<br>5 | regulation of<br>macrophage cytokine<br>production                   | 3/<br>40<br>8 | 14<br>/1<br>79<br>13 | 0.0<br>03<br>54<br>15<br>65 | 0.0<br>24<br>13<br>25<br>03 | 0.0<br>17<br>63<br>04<br>38 | 10417/7042/7043 | 3 |
| B<br>P | G<br>O:<br>00<br>35<br>79<br>1 | platelet-derived growth<br>factor receptor-beta<br>signaling pathway | 3/<br>40<br>8 | 14<br>/1<br>79<br>13 | 0.0<br>03<br>54<br>15<br>65 | 0.0<br>24<br>13<br>25<br>03 | 0.0<br>17<br>63<br>04<br>38 | 4015/5159/5157  | 3 |
| B<br>P | G<br>O:<br>00<br>38<br>16<br>6 | angiotensin-activated<br>signaling pathway                           | 3/<br>40<br>8 | 14<br>/1<br>79<br>13 | 0.0<br>03<br>54<br>15<br>65 | 0.0<br>24<br>13<br>25<br>03 | 0.0<br>17<br>63<br>04<br>38 | 88/185/857      | 3 |
| B<br>P | G<br>O:<br>00<br>45<br>98<br>6 | negative regulation of<br>smooth muscle<br>contraction               | 3/<br>40<br>8 | 14<br>/1<br>79<br>13 | 0.0<br>03<br>54<br>15<br>65 | 0.0<br>24<br>13<br>25<br>03 | 0.0<br>17<br>63<br>04<br>38 | 2982/5592/5743  | 3 |
| B<br>P | G<br>O:<br>00<br>48<br>56<br>9 | post-embryonic animal<br>organ development                           | 3/<br>40<br>8 | 14<br>/1<br>79<br>13 | 0.0<br>03<br>54<br>15<br>65 | 0.0<br>24<br>13<br>25<br>03 | 0.0<br>17<br>63<br>04<br>38 | 2202/2200/4237  | 3 |



|        |                                |                                                                                                  |                |                           |                             |                             |                             |                                                                                                      |        |
|--------|--------------------------------|--------------------------------------------------------------------------------------------------|----------------|---------------------------|-----------------------------|-----------------------------|-----------------------------|------------------------------------------------------------------------------------------------------|--------|
| B<br>P | G<br>O:<br>19<br>02<br>04<br>3 | positive regulation of<br>extrinsic apoptotic<br>signaling pathway via<br>death domain receptors | 3/<br>40<br>8  | 14<br>/1<br>79<br>13      | 0.0<br>03<br>54<br>15<br>65 | 0.0<br>24<br>13<br>25<br>03 | 0.0<br>17<br>63<br>04<br>38 | 658/7057/7078                                                                                        | 3      |
| B<br>P | G<br>O:<br>19<br>03<br>05<br>4 | negative regulation of<br>extracellular matrix<br>organization                                   | 3/<br>40<br>8  | 14<br>/1<br>79<br>13      | 0.0<br>03<br>54<br>15<br>65 | 0.0<br>24<br>13<br>25<br>03 | 0.0<br>17<br>63<br>04<br>38 | 84168/11117/2191                                                                                     | 3      |
| B<br>P | G<br>O:<br>19<br>05<br>04<br>9 | negative regulation of<br>metallopeptidase<br>activity                                           | 3/<br>40<br>8  | 14<br>/1<br>79<br>13      | 0.0<br>03<br>54<br>15<br>65 | 0.0<br>24<br>13<br>25<br>03 | 0.0<br>17<br>63<br>04<br>38 | 7076/7077/7078                                                                                       | 3      |
| B<br>P | G<br>O:<br>00<br>07<br>54<br>8 | sex differentiation                                                                              | 14<br>/4<br>08 | 26<br>9/<br>17<br>91<br>3 | 0.0<br>03<br>60<br>07<br>65 | 0.0<br>24<br>49<br>16<br>92 | 0.0<br>17<br>89<br>28<br>5  | 558/658/1588/2316/2627/3624/4327/5156/5159/4920/6423/7042/7490/23414                                 | 1<br>4 |
| B<br>P | G<br>O:<br>00<br>22<br>40<br>7 | regulation of cell-cell<br>adhesion                                                              | 18<br>/4<br>08 | 38<br>9/<br>17<br>91<br>3 | 0.0<br>03<br>69<br>28<br>33 | 0.0<br>25<br>04<br>69<br>98 | 0.0<br>18<br>29<br>85<br>39 | 170692/9370/114897/857/6387/2736/2737/3037/55083/3956/2615/91663/10630/5592/<br>5270/6591/55714/7070 | 1<br>8 |
| B<br>P | G<br>O:<br>00<br>48<br>14<br>4 | fibroblast proliferation                                                                         | 7/<br>40<br>8  | 87<br>/1<br>79<br>13      | 0.0<br>03<br>69<br>66<br>27 | 0.0<br>25<br>04<br>69<br>98 | 0.0<br>18<br>29<br>85<br>39 | 4921/2335/2621/56034/5156/5159/7472                                                                  | 7      |
| B<br>P | G<br>O:<br>00                  | negative regulation of<br>hydrolase activity                                                     | 19<br>/4<br>08 | 42<br>0/<br>17            | 0.0<br>03<br>70             | 0.0<br>25<br>04             | 0.0<br>18<br>29             | 3730/83987/1293/1410/1470/1893/2621/3082/3953/5627/5743/5054/6423/6695/7042/<br>7057/7076/7077/7078  | 1<br>9 |

|        |                                |                                                      |                |                           |                             |                             |                             |                                                            |        |
|--------|--------------------------------|------------------------------------------------------|----------------|---------------------------|-----------------------------|-----------------------------|-----------------------------|------------------------------------------------------------|--------|
|        | 51<br>34<br>6                  |                                                      |                | 91<br>3                   | 23<br>11                    | 69<br>98                    | 85<br>39                    |                                                            |        |
| B<br>P | G<br>O:<br>00<br>46<br>66<br>1 | male sex differentiation                             | 10<br>/4<br>08 | 16<br>0/<br>17<br>91<br>3 | 0.0<br>03<br>71<br>19<br>82 | 0.0<br>25<br>06<br>74<br>97 | 0.0<br>18<br>31<br>35<br>14 | 2316/2627/3624/5156/5159/4920/6423/7042/7490/23414         | 1<br>0 |
| B<br>P | G<br>O:<br>00<br>10<br>97<br>7 | negative regulation of neuron projection development | 9/<br>40<br>8  | 13<br>5/<br>17<br>91<br>3 | 0.0<br>03<br>79<br>37<br>18 | 0.0<br>25<br>49<br>42<br>89 | 0.0<br>18<br>62<br>53<br>16 | 1809/3956/10769/5376/6695/11075/7070/7431/22891            | 9      |
| B<br>P | G<br>O:<br>00<br>30<br>51<br>4 | negative regulation of BMP signaling pathway         | 5/<br>40<br>8  | 46<br>/1<br>79<br>13      | 0.0<br>03<br>80<br>60<br>8  | 0.0<br>25<br>49<br>42<br>89 | 0.0<br>18<br>62<br>53<br>16 | 2200/26585/5654/94031/6423                                 | 5      |
| B<br>P | G<br>O:<br>00<br>31<br>63<br>8 | zymogen activation                                   | 5/<br>40<br>8  | 46<br>/1<br>79<br>13      | 0.0<br>03<br>80<br>60<br>8  | 0.0<br>25<br>49<br>42<br>89 | 0.0<br>18<br>62<br>53<br>16 | 715/5328/5054/5270/7057                                    | 5      |
| B<br>P | G<br>O:<br>00<br>48<br>80<br>6 | genitalia development                                | 5/<br>40<br>8  | 46<br>/1<br>79<br>13      | 0.0<br>03<br>80<br>60<br>8  | 0.0<br>25<br>49<br>42<br>89 | 0.0<br>18<br>62<br>53<br>16 | 558/1588/5156/4920/7490                                    | 5      |
| B<br>P | G<br>O:<br>00<br>50<br>86<br>6 | negative regulation of cell activation               | 11<br>/4<br>08 | 18<br>7/<br>17<br>91<br>3 | 0.0<br>03<br>80<br>89<br>48 | 0.0<br>25<br>49<br>42<br>89 | 0.0<br>18<br>62<br>53<br>16 | 170692/558/114897/4345/11117/2737/3624/2615/5156/5592/5270 | 1<br>1 |

|        |                                |                                                                               |                |                           |                             |                             |                             |                                                                                              |        |
|--------|--------------------------------|-------------------------------------------------------------------------------|----------------|---------------------------|-----------------------------|-----------------------------|-----------------------------|----------------------------------------------------------------------------------------------|--------|
| B<br>P | G<br>O:<br>00<br>51<br>96<br>5 | positive regulation of<br>synapse assembly                                    | 6/<br>40<br>8  | 66<br>/1<br>79<br>13      | 0.0<br>03<br>86<br>60<br>01 | 0.0<br>25<br>83<br>03<br>61 | 0.0<br>18<br>87<br>08<br>39 | 23768/4915/5789/139065/27286/7058                                                            | 6      |
| B<br>P | G<br>O:<br>00<br>46<br>62<br>0 | regulation of organ<br>growth                                                 | 8/<br>40<br>8  | 11<br>/1<br>17<br>91<br>3 | 0.0<br>03<br>88<br>37<br>06 | 0.0<br>25<br>90<br>28<br>09 | 0.0<br>18<br>92<br>37<br>67 | 2260/2303/2627/3776/5999/7472/7490/23414                                                     | 8      |
| B<br>P | G<br>O:<br>00<br>42<br>44<br>5 | hormone metabolic<br>process                                                  | 12<br>/4<br>08 | 21<br>5/<br>17<br>91<br>3 | 0.0<br>03<br>92<br>12<br>57 | 0.0<br>26<br>10<br>71<br>32 | 0.0<br>19<br>07<br>30<br>39 | 220/1066/10699/1588/1545/1734/2260/2690/8630/5122/5125/5156                                  | 1<br>2 |
| B<br>P | G<br>O:<br>00<br>06<br>92<br>9 | substrate-dependent<br>cell migration                                         | 4/<br>40<br>8  | 29<br>/1<br>79<br>13      | 0.0<br>04<br>01<br>27<br>41 | 0.0<br>26<br>62<br>23<br>16 | 0.0<br>19<br>44<br>94<br>16 | 2335/22801/8828/6591                                                                         | 4      |
| B<br>P | G<br>O:<br>00<br>10<br>57<br>5 | positive regulation of<br>vascular endothelial<br>growth factor<br>production | 4/<br>40<br>8  | 29<br>/1<br>79<br>13      | 0.0<br>04<br>01<br>27<br>41 | 0.0<br>26<br>62<br>23<br>16 | 0.0<br>19<br>44<br>94<br>16 | 1545/5743/23213/55959                                                                        | 4      |
| B<br>P | G<br>O:<br>00<br>31<br>34<br>6 | positive regulation of<br>cell projection<br>organization                     | 17<br>/4<br>08 | 36<br>2/<br>17<br>91<br>3 | 0.0<br>04<br>06<br>97<br>01 | 0.0<br>26<br>95<br>28<br>44 | 0.0<br>19<br>69<br>08<br>89 | 1272/6387/1809/22873/2042/2260/2335/3082/4131/89795/4915/5587/5789/5176/1107<br>5/55714/7043 | 1<br>7 |
| B<br>P | G<br>O:<br>19                  | regulation of adherens<br>junction organization                               | 6/<br>40<br>8  | 67<br>/1<br>79            | 0.0<br>04<br>16             | 0.0<br>27<br>49             | 0.0<br>20<br>08             | 1307/2042/26585/90102/7057/7070                                                              | 6      |

|        |                                |                                                            |                |                           |                             |                             |                             |                                                             |        |
|--------|--------------------------------|------------------------------------------------------------|----------------|---------------------------|-----------------------------|-----------------------------|-----------------------------|-------------------------------------------------------------|--------|
|        | 03<br>39<br>1                  |                                                            |                | 13                        | 65<br>66                    | 76<br>16                    | 88<br>82                    |                                                             |        |
| B<br>P | G<br>O:<br>00<br>08<br>58<br>4 | male gonad<br>development                                  | 9/<br>40<br>8  | 13<br>7/<br>17<br>91<br>3 | 0.0<br>04<br>17<br>99<br>93 | 0.0<br>27<br>49<br>76<br>16 | 0.0<br>20<br>08<br>88<br>82 | 2316/2627/3624/5156/5159/6423/7042/7490/23414               | 9      |
| B<br>P | G<br>O:<br>00<br>14<br>91<br>1 | positive regulation of<br>smooth muscle cell<br>migration  | 5/<br>40<br>8  | 47<br>/1<br>79<br>13      | 0.0<br>04<br>18<br>10<br>94 | 0.0<br>27<br>49<br>76<br>16 | 0.0<br>20<br>08<br>88<br>82 | 3037/3488/50507/5159/10631                                  | 5      |
| B<br>P | G<br>O:<br>19<br>03<br>11<br>5 | regulation of actin<br>filament-based<br>movement          | 5/<br>40<br>8  | 47<br>/1<br>79<br>13      | 0.0<br>04<br>18<br>10<br>94 | 0.0<br>27<br>49<br>76<br>16 | 0.0<br>20<br>08<br>88<br>82 | 857/2316/2702/10630/6781                                    | 5      |
| B<br>P | G<br>O:<br>00<br>08<br>40<br>6 | gonad development                                          | 12<br>/4<br>08 | 21<br>7/<br>17<br>91<br>3 | 0.0<br>04<br>22<br>14<br>9  | 0.0<br>27<br>71<br>50<br>03 | 0.0<br>20<br>24<br>76<br>98 | 658/1588/2316/2627/3624/4327/5156/5159/6423/7042/7490/23414 | 1<br>2 |
| B<br>P | G<br>O:<br>00<br>50<br>68<br>0 | negative regulation of<br>epithelial cell<br>proliferation | 10<br>/4<br>08 | 16<br>3/<br>17<br>91<br>3 | 0.0<br>04<br>23<br>35<br>76 | 0.0<br>27<br>74<br>60<br>92 | 0.0<br>20<br>27<br>04<br>11 | 857/687/7857/5176/6423/6591/6678/23213/7042/7057            | 1<br>0 |
| B<br>P | G<br>O:<br>00<br>03<br>27<br>9 | cardiac septum<br>development                              | 8/<br>40<br>8  | 11<br>3/<br>17<br>91<br>3 | 0.0<br>04<br>32<br>87<br>4  | 0.0<br>28<br>32<br>06<br>12 | 0.0<br>20<br>69<br>01<br>37 | 11174/2627/2702/8828/5125/57167/7042/23414                  | 8      |

|        |                                |                                                                  |                |                           |                             |                             |                             |                                                                                           |        |
|--------|--------------------------------|------------------------------------------------------------------|----------------|---------------------------|-----------------------------|-----------------------------|-----------------------------|-------------------------------------------------------------------------------------------|--------|
| B<br>P | G<br>O:<br>00<br>34<br>35<br>6 | NAD biosynthesis via<br>nicotinamide riboside<br>salvage pathway | 3/<br>40<br>8  | 15<br>/1<br>79<br>13      | 0.0<br>04<br>35<br>28<br>08 | 0.0<br>28<br>42<br>88<br>05 | 0.0<br>20<br>76<br>91<br>79 | 4837/5740/5743                                                                            | 3      |
| B<br>P | G<br>O:<br>00<br>30<br>87<br>9 | mammary gland<br>development                                     | 9/<br>40<br>8  | 13<br>8/<br>17<br>91<br>3 | 0.0<br>04<br>38<br>43<br>06 | 0.0<br>28<br>53<br>57<br>85 | 0.0<br>20<br>84<br>73<br>35 | 857/6356/1588/2736/2737/3488/8660/7043/7472                                               | 9      |
| B<br>P | G<br>O:<br>00<br>46<br>54<br>6 | development of primary<br>male sexual<br>characteristics         | 9/<br>40<br>8  | 13<br>8/<br>17<br>91<br>3 | 0.0<br>04<br>38<br>43<br>06 | 0.0<br>28<br>53<br>57<br>85 | 0.0<br>20<br>84<br>73<br>35 | 2316/2627/3624/5156/5159/6423/7042/7490/23414                                             | 9      |
| B<br>P | G<br>O:<br>00<br>06<br>93<br>7 | regulation of muscle<br>contraction                              | 10<br>/4<br>08 | 16<br>4/<br>17<br>91<br>3 | 0.0<br>04<br>41<br>97<br>35 | 0.0<br>28<br>71<br>68<br>66 | 0.0<br>20<br>97<br>96<br>28 | 857/2316/2702/2982/10398/255743/5592/5743/6781/7168                                       | 1<br>0 |
| B<br>P | G<br>O:<br>00<br>01<br>55<br>8 | regulation of cell growth                                        | 18<br>/4<br>08 | 39<br>6/<br>17<br>91<br>3 | 0.0<br>04<br>44<br>03<br>78 | 0.0<br>28<br>80<br>14<br>24 | 0.0<br>21<br>04<br>14<br>03 | 185/552/1410/6387/5167/2335/26585/3488/3490/3624/4131/91584/5999/5270/6423/6695/7042/7490 | 1<br>8 |
| B<br>P | G<br>O:<br>00<br>07<br>20<br>2 | activation of<br>phospholipase C<br>activity                     | 4/<br>40<br>8  | 30<br>/1<br>79<br>13      | 0.0<br>04<br>54<br>81<br>12 | 0.0<br>29<br>21<br>63<br>81 | 0.0<br>21<br>34<br>45<br>57 | 552/1909/3357/4915                                                                        | 4      |
| B<br>P | G<br>O:<br>00                  | negative regulation of<br>smoothed signaling<br>pathway          | 4/<br>40<br>8  | 30<br>/1<br>79            | 0.0<br>04<br>54             | 0.0<br>29<br>21             | 0.0<br>21<br>34             | 5167/2737/84662/5270                                                                      | 4      |

|        |                                |                                                                 |                |                           |                             |                             |                             |                                                                                                                |        |
|--------|--------------------------------|-----------------------------------------------------------------|----------------|---------------------------|-----------------------------|-----------------------------|-----------------------------|----------------------------------------------------------------------------------------------------------------|--------|
|        | 45<br>87<br>9                  |                                                                 |                | 13                        | 81<br>12                    | 63<br>81                    | 45<br>57                    |                                                                                                                |        |
| B<br>P | G<br>O:<br>00<br>61<br>08<br>2 | myeloid leukocyte<br>cytokine production                        | 4/<br>40<br>8  | 30<br>/1<br>79<br>13      | 0.0<br>04<br>54<br>81<br>12 | 0.0<br>29<br>21<br>63<br>81 | 0.0<br>21<br>34<br>45<br>57 | 2621/10417/7042/7043                                                                                           | 4      |
| B<br>P | G<br>O:<br>00<br>99<br>62<br>3 | regulation of cardiac<br>muscle cell membrane<br>repolarization | 4/<br>40<br>8  | 30<br>/1<br>79<br>13      | 0.0<br>04<br>54<br>81<br>12 | 0.0<br>29<br>21<br>63<br>81 | 0.0<br>21<br>34<br>45<br>57 | 781/2316/2702/6330                                                                                             | 4      |
| B<br>P | G<br>O:<br>19<br>04<br>83<br>7 | beta-catenin-TCF<br>complex assembly                            | 4/<br>40<br>8  | 30<br>/1<br>79<br>13      | 0.0<br>04<br>54<br>81<br>12 | 0.0<br>29<br>21<br>63<br>81 | 0.0<br>21<br>34<br>45<br>57 | 8313/51339/26108/83439                                                                                         | 4      |
| B<br>P | G<br>O:<br>00<br>46<br>66<br>0 | female sex<br>differentiation                                   | 8/<br>40<br>8  | 11<br>4/<br>17<br>91<br>3 | 0.0<br>04<br>56<br>54<br>68 | 0.0<br>29<br>21<br>63<br>81 | 0.0<br>21<br>34<br>45<br>57 | 558/658/1588/3624/4327/5156/7490/23414                                                                         | 8      |
| B<br>P | G<br>O:<br>00<br>22<br>41<br>1 | cellular component<br>disassembly                               | 21<br>/4<br>08 | 49<br>2/<br>17<br>91<br>3 | 0.0<br>04<br>57<br>85<br>13 | 0.0<br>29<br>21<br>63<br>81 | 0.0<br>21<br>34<br>45<br>57 | 88/9507/857/1513/4921/2191/5654/4131/4320/4327/4313/4314/89795/10630/130271/<br>6591/11075/7043/7076/7077/7092 | 2<br>1 |
| B<br>P | G<br>O:<br>00<br>02<br>68<br>6 | negative regulation of<br>leukocyte migration                   | 5/<br>40<br>8  | 48<br>/1<br>79<br>13      | 0.0<br>04<br>58<br>17<br>48 | 0.0<br>29<br>21<br>63<br>81 | 0.0<br>21<br>34<br>45<br>57 | 4345/6387/1588/11117/26585                                                                                     | 5      |

|        |                                |                                                               |               |                           |                             |                             |                             |                                                |   |
|--------|--------------------------------|---------------------------------------------------------------|---------------|---------------------------|-----------------------------|-----------------------------|-----------------------------|------------------------------------------------|---|
| B<br>P | G<br>O:<br>00<br>48<br>54<br>6 | digestive tract<br>morphogenesis                              | 5/<br>40<br>8 | 48<br>/1<br>79<br>13      | 0.0<br>04<br>58<br>17<br>48 | 0.0<br>29<br>21<br>63<br>81 | 0.0<br>21<br>34<br>45<br>57 | 51339/2736/2737/5156/6423                      | 5 |
| B<br>P | G<br>O:<br>00<br>55<br>01<br>0 | ventricular cardiac<br>muscle tissue<br>morphogenesis         | 5/<br>40<br>8 | 48<br>/1<br>79<br>13      | 0.0<br>04<br>58<br>17<br>48 | 0.0<br>29<br>21<br>63<br>81 | 0.0<br>21<br>34<br>45<br>57 | 1301/2303/7042/7168/23414                      | 5 |
| B<br>P | G<br>O:<br>00<br>51<br>38<br>4 | response to<br>glucocorticoid                                 | 9/<br>40<br>8 | 13<br>9/<br>17<br>91<br>3 | 0.0<br>04<br>59<br>63<br>23 | 0.0<br>29<br>25<br>98<br>99 | 0.0<br>21<br>37<br>63<br>5  | 9370/552/114907/3490/687/5743/5176/6678/6781   | 9 |
| B<br>P | G<br>O:<br>00<br>10<br>92<br>7 | cellular component<br>assembly involved in<br>morphogenesis   | 7/<br>40<br>8 | 91<br>/1<br>79<br>13      | 0.0<br>04<br>74<br>05<br>79 | 0.0<br>30<br>12<br>74<br>2  | 0.0<br>22<br>01<br>01<br>33 | 88/80206/5156/5159/90102/26011/7168            | 7 |
| B<br>P | G<br>O:<br>00<br>71<br>80<br>4 | cellular potassium ion<br>transport                           | 9/<br>40<br>8 | 14<br>0/<br>17<br>91<br>3 | 0.0<br>04<br>81<br>62<br>38 | 0.0<br>30<br>47<br>20<br>23 | 0.0<br>22<br>26<br>18<br>9  | 10060/88/857/2316/3764/3776/343450/259232/5999 | 9 |
| B<br>P | G<br>O:<br>00<br>71<br>80<br>5 | potassium ion<br>transmembrane<br>transport                   | 9/<br>40<br>8 | 14<br>0/<br>17<br>91<br>3 | 0.0<br>04<br>81<br>62<br>38 | 0.0<br>30<br>47<br>20<br>23 | 0.0<br>22<br>26<br>18<br>9  | 10060/88/857/2316/3764/3776/343450/259232/5999 | 9 |
| B<br>P | G<br>O:<br>00                  | negative regulation of<br>smooth muscle cell<br>proliferation | 6/<br>40<br>8 | 69<br>/1<br>79            | 0.0<br>04<br>81             | 0.0<br>30<br>47             | 0.0<br>22<br>26             | 9370/3488/4883/5592/7043/7168                  | 6 |

|        |                                |                                              |                |                           |                             |                             |                             |                                                                                                 |        |
|--------|--------------------------------|----------------------------------------------|----------------|---------------------------|-----------------------------|-----------------------------|-----------------------------|-------------------------------------------------------------------------------------------------|--------|
|        | 48<br>66<br>2                  |                                              |                | 13                        | 90<br>19                    | 20<br>23                    | 18<br>9                     |                                                                                                 |        |
| B<br>P | G<br>O:<br>00<br>09<br>10<br>0 | glycoprotein metabolic process               | 17<br>/4<br>08 | 36<br>9/<br>17<br>91<br>3 | 0.0<br>04<br>91<br>87<br>41 | 0.0<br>31<br>05<br>05<br>81 | 0.0<br>22<br>68<br>45<br>65 | 81792/633/658/1301/1464/1634/29940/92126/117248/11227/727936/22822/81849/23213/55959/1462/64131 | 1<br>7 |
| B<br>P | G<br>O:<br>00<br>35<br>27<br>2 | exocrine system development                  | 5/<br>40<br>8  | 49<br>/1<br>79<br>13      | 0.0<br>05<br>00<br>89<br>64 | 0.0<br>31<br>46<br>22<br>98 | 0.0<br>22<br>98<br>53<br>52 | 2260/3082/6591/7042/7043                                                                        | 5      |
| B<br>P | G<br>O:<br>00<br>43<br>11<br>3 | receptor clustering                          | 5/<br>40<br>8  | 49<br>/1<br>79<br>13      | 0.0<br>05<br>00<br>89<br>64 | 0.0<br>31<br>46<br>22<br>98 | 0.0<br>22<br>98<br>53<br>52 | 1000/2316/2743/9379/7070                                                                        | 5      |
| B<br>P | G<br>O:<br>00<br>60<br>39<br>5 | SMAD protein signal transduction             | 5/<br>40<br>8  | 49<br>/1<br>79<br>13      | 0.0<br>05<br>00<br>89<br>64 | 0.0<br>31<br>46<br>22<br>98 | 0.0<br>22<br>98<br>53<br>52 | 8483/4920/7042/7043/7431                                                                        | 5      |
| B<br>P | G<br>O:<br>00<br>33<br>68<br>7 | osteoblast proliferation                     | 4/<br>40<br>8  | 31<br>/1<br>79<br>13      | 0.0<br>05<br>12<br>95<br>29 | 0.0<br>32<br>11<br>27<br>26 | 0.0<br>23<br>46<br>05<br>34 | 115908/26585/4883/63923                                                                         | 4      |
| B<br>P | G<br>O:<br>00<br>61<br>03<br>6 | positive regulation of cartilage development | 4/<br>40<br>8  | 31<br>/1<br>79<br>13      | 0.0<br>05<br>12<br>95<br>29 | 0.0<br>32<br>11<br>27<br>26 | 0.0<br>23<br>46<br>05<br>34 | 658/2737/4017/91461                                                                             | 4      |



|        |                                |                                                  |                |                           |                             |                             |                             |                                                                                                          |        |
|--------|--------------------------------|--------------------------------------------------|----------------|---------------------------|-----------------------------|-----------------------------|-----------------------------|----------------------------------------------------------------------------------------------------------|--------|
| B<br>P | G<br>O:<br>00<br>45<br>13<br>7 | development of primary<br>sexual characteristics | 12<br>/4<br>08 | 22<br>3/<br>17<br>91<br>3 | 0.0<br>05<br>23<br>43<br>36 | 0.0<br>32<br>65<br>26<br>74 | 0.0<br>23<br>85<br>50<br>04 | 658/1588/2316/2627/3624/4327/5156/5159/6423/7042/7490/23414                                              | 1<br>2 |
| B<br>P | G<br>O:<br>00<br>16<br>04<br>9 | cell growth                                      | 20<br>/4<br>08 | 46<br>6/<br>17<br>91<br>3 | 0.0<br>05<br>26<br>52<br>47 | 0.0<br>32<br>65<br>26<br>74 | 0.0<br>23<br>85<br>50<br>04 | 185/552/1410/6387/5167/2335/26585/3488/3490/3624/4131/8828/91584/10631/5999/<br>5270/6423/6695/7042/7490 | 2<br>0 |
| B<br>P | G<br>O:<br>00<br>02<br>07<br>6 | osteoblast<br>development                        | 3/<br>40<br>8  | 16<br>/1<br>79<br>13      | 0.0<br>05<br>26<br>76<br>76 | 0.0<br>32<br>65<br>26<br>74 | 0.0<br>23<br>85<br>50<br>04 | 2736/5745/63923                                                                                          | 3      |
| B<br>P | G<br>O:<br>00<br>60<br>57<br>2 | morphogenesis of an<br>epithelial bud            | 3/<br>40<br>8  | 16<br>/1<br>79<br>13      | 0.0<br>05<br>26<br>76<br>76 | 0.0<br>32<br>65<br>26<br>74 | 0.0<br>23<br>85<br>50<br>04 | 2736/23213/7472                                                                                          | 3      |
| B<br>P | G<br>O:<br>00<br>70<br>29<br>3 | renal absorption                                 | 3/<br>40<br>8  | 16<br>/1<br>79<br>13      | 0.0<br>05<br>26<br>76<br>76 | 0.0<br>32<br>65<br>26<br>74 | 0.0<br>23<br>85<br>50<br>04 | 9370/2621/3037                                                                                           | 3      |
| B<br>P | G<br>O:<br>00<br>72<br>28<br>3 | metanephric renal<br>vesicle morphogenesis       | 3/<br>40<br>8  | 16<br>/1<br>79<br>13      | 0.0<br>05<br>26<br>76<br>76 | 0.0<br>32<br>65<br>26<br>74 | 0.0<br>23<br>85<br>50<br>04 | 26585/55083/3976                                                                                         | 3      |
| B<br>P | G<br>O:<br>00                  | segmentation                                     | 7/<br>40<br>8  | 93<br>/1<br>79            | 0.0<br>05<br>33             | 0.0<br>32<br>98             | 0.0<br>24<br>09             | 8313/2303/4223/8828/4920/6423/7490                                                                       | 7      |

|        |                                |                                                |                |                           |                             |                             |                             |                                                        |        |
|--------|--------------------------------|------------------------------------------------|----------------|---------------------------|-----------------------------|-----------------------------|-----------------------------|--------------------------------------------------------|--------|
|        | 35<br>28<br>2                  |                                                |                | 13                        | 90<br>91                    | 70<br>18                    | 92<br>65                    |                                                        |        |
| B<br>P | G<br>O:<br>00<br>44<br>07<br>0 | regulation of anion<br>transport               | 7/<br>40<br>8  | 93<br>/1<br>79<br>13      | 0.0<br>05<br>33<br>90<br>91 | 0.0<br>32<br>98<br>70<br>18 | 0.0<br>24<br>09<br>92<br>65 | 552/2260/8660/5999/6424/6781/7057                      | 7      |
| B<br>P | G<br>O:<br>00<br>22<br>40<br>8 | negative regulation of<br>cell-cell adhesion   | 10<br>/4<br>08 | 16<br>9/<br>17<br>91<br>3 | 0.0<br>05<br>44<br>94<br>19 | 0.0<br>33<br>61<br>36<br>57 | 0.0<br>24<br>55<br>70<br>67 | 170692/9370/114897/6387/2737/2615/91663/5592/5270/6591 | 1<br>0 |
| B<br>P | G<br>O:<br>01<br>06<br>10<br>6 | cold-induced<br>thermogenesis                  | 9/<br>40<br>8  | 14<br>3/<br>17<br>91<br>3 | 0.0<br>05<br>52<br>53<br>18 | 0.0<br>33<br>97<br>08<br>09 | 0.0<br>24<br>81<br>79<br>91 | 9370/857/1734/2303/3953/4237/4883/56034/23090          | 9      |
| B<br>P | G<br>O:<br>01<br>20<br>16<br>1 | regulation of<br>cold-induced<br>thermogenesis | 9/<br>40<br>8  | 14<br>3/<br>17<br>91<br>3 | 0.0<br>05<br>52<br>53<br>18 | 0.0<br>33<br>97<br>08<br>09 | 0.0<br>24<br>81<br>79<br>91 | 9370/857/1734/2303/3953/4237/4883/56034/23090          | 9      |
| B<br>P | G<br>O:<br>00<br>01<br>70<br>7 | mesoderm formation                             | 6/<br>40<br>8  | 71<br>/1<br>79<br>13      | 0.0<br>05<br>54<br>36<br>06 | 0.0<br>33<br>97<br>25<br>84 | 0.0<br>24<br>81<br>92<br>87 | 2138/2260/2303/3624/3690/6423                          | 6      |
| B<br>P | G<br>O:<br>00<br>31<br>67<br>0 | cellular response to<br>nutrient               | 6/<br>40<br>8  | 71<br>/1<br>79<br>13      | 0.0<br>05<br>54<br>36<br>06 | 0.0<br>33<br>97<br>25<br>84 | 0.0<br>24<br>81<br>92<br>87 | 1277/2621/10631/5743/6591/3371                         | 6      |

|        |                                |                                                          |                |                           |                             |                             |                             |                                                                                      |        |
|--------|--------------------------------|----------------------------------------------------------|----------------|---------------------------|-----------------------------|-----------------------------|-----------------------------|--------------------------------------------------------------------------------------|--------|
| B<br>P | G<br>O:<br>00<br>06<br>94<br>1 | striated muscle<br>contraction                           | 10<br>/4<br>08 | 17<br>0/<br>17<br>91<br>3 | 0.0<br>05<br>67<br>61<br>96 | 0.0<br>34<br>72<br>87<br>5  | 0.0<br>25<br>37<br>17<br>18 | 781/857/2316/2702/23704/3764/6330/6444/6781/7168                                     | 1<br>0 |
| B<br>P | G<br>O:<br>00<br>48<br>54<br>5 | response to steroid<br>hormone                           | 17<br>/4<br>08 | 37<br>5/<br>17<br>91<br>3 | 0.0<br>05<br>75<br>71<br>9  | 0.0<br>35<br>00<br>65<br>83 | 0.0<br>25<br>57<br>46<br>94 | 9370/552/857/1277/9420/114907/3490/687/4015/56937/5743/5176/6678/6781/7042/7043/7057 | 1<br>7 |
| B<br>P | G<br>O:<br>00<br>16<br>48<br>6 | peptide hormone<br>processing                            | 4/<br>40<br>8  | 32<br>/1<br>79<br>13      | 0.0<br>05<br>75<br>86<br>99 | 0.0<br>35<br>00<br>65<br>83 | 0.0<br>25<br>57<br>46<br>94 | 1066/10699/5122/5125                                                                 | 4      |
| B<br>P | G<br>O:<br>00<br>71<br>70<br>9 | membrane assembly                                        | 4/<br>40<br>8  | 32<br>/1<br>79<br>13      | 0.0<br>05<br>75<br>86<br>99 | 0.0<br>35<br>00<br>65<br>83 | 0.0<br>25<br>57<br>46<br>94 | 857/1000/9379/5789                                                                   | 4      |
| B<br>P | G<br>O:<br>00<br>86<br>01<br>9 | cell-cell signaling<br>involved in cardiac<br>conduction | 4/<br>40<br>8  | 32<br>/1<br>79<br>13      | 0.0<br>05<br>75<br>86<br>99 | 0.0<br>35<br>00<br>65<br>83 | 0.0<br>25<br>57<br>46<br>94 | 781/2316/2702/6330                                                                   | 4      |
| B<br>P | G<br>O:<br>00<br>33<br>13<br>5 | regulation of<br>peptidyl-serine<br>phosphorylation      | 8/<br>40<br>8  | 11<br>9/<br>17<br>91<br>3 | 0.0<br>05<br>90<br>16<br>32 | 0.0<br>35<br>81<br>77<br>82 | 0.0<br>26<br>16<br>73<br>31 | 857/2621/3082/3976/4915/5587/5743/6423                                               | 8      |
| B<br>P | G<br>O:<br>00                  | adenylate<br>cyclase-inhibiting G<br>protein-coupled     | 6/<br>40<br>8  | 72<br>/1<br>79            | 0.0<br>05<br>93             | 0.0<br>35<br>86             | 0.0<br>26<br>19             | 9590/1909/2316/2550/2774/4883                                                        | 6      |

|        |                                |                                                           |               |                           |                             |                             |                             |                                                    |   |
|--------|--------------------------------|-----------------------------------------------------------|---------------|---------------------------|-----------------------------|-----------------------------|-----------------------------|----------------------------------------------------|---|
|        | 07<br>19<br>3                  | receptor signaling pathway                                |               | 13                        | 43<br>37                    | 09<br>77                    | 88<br>87                    |                                                    |   |
| B<br>P | G<br>O:<br>00<br>30<br>23<br>9 | myofibril assembly                                        | 5/<br>40<br>8 | 51<br>/1<br>79<br>13      | 0.0<br>05<br>94<br>67<br>47 | 0.0<br>35<br>86<br>09<br>77 | 0.0<br>26<br>19<br>88<br>87 | 88/80206/5156/5159/7168                            | 5 |
| B<br>P | G<br>O:<br>00<br>45<br>59<br>9 | negative regulation of fat cell differentiation           | 5/<br>40<br>8 | 51<br>/1<br>79<br>13      | 0.0<br>05<br>94<br>67<br>47 | 0.0<br>35<br>86<br>09<br>77 | 0.0<br>26<br>19<br>88<br>87 | 9370/5167/4320/862/23414                           | 5 |
| B<br>P | G<br>O:<br>19<br>00<br>02<br>4 | regulation of substrate adhesion-dependent cell spreading | 5/<br>40<br>8 | 51<br>/1<br>79<br>13      | 0.0<br>05<br>94<br>67<br>47 | 0.0<br>35<br>86<br>09<br>77 | 0.0<br>26<br>19<br>88<br>87 | 2316/3037/91663/10630/10631                        | 5 |
| B<br>P | G<br>O:<br>00<br>08<br>58<br>5 | female gonad development                                  | 7/<br>40<br>8 | 95<br>/1<br>79<br>13      | 0.0<br>05<br>99<br>25<br>64 | 0.0<br>36<br>07<br>96<br>29 | 0.0<br>26<br>35<br>86<br>28 | 658/1588/3624/4327/5156/7490/23414                 | 7 |
| B<br>P | G<br>O:<br>00<br>35<br>56<br>7 | non-canonical Wnt signaling pathway                       | 9/<br>40<br>8 | 14<br>5/<br>17<br>91<br>3 | 0.0<br>06<br>04<br>11<br>28 | 0.0<br>36<br>20<br>19<br>42 | 0.0<br>26<br>44<br>79<br>86 | 115908/51339/2239/10082/144165/4919/4920/6423/6424 | 9 |
| B<br>P | G<br>O:<br>00<br>55<br>00<br>2 | striated muscle cell development                          | 9/<br>40<br>8 | 14<br>5/<br>17<br>91<br>3 | 0.0<br>06<br>04<br>11<br>28 | 0.0<br>36<br>20<br>19<br>42 | 0.0<br>26<br>44<br>79<br>86 | 88/1311/80206/4015/5156/5159/5999/6444/7168        | 9 |

|        |                                |                                                      |                |                           |                             |                             |                             |                                                                                                             |        |
|--------|--------------------------------|------------------------------------------------------|----------------|---------------------------|-----------------------------|-----------------------------|-----------------------------|-------------------------------------------------------------------------------------------------------------|--------|
| B<br>P | G<br>O:<br>00<br>51<br>49<br>3 | regulation of<br>cytoskeleton<br>organization        | 20<br>/4<br>08 | 47<br>2/<br>17<br>91<br>3 | 0.0<br>06<br>04<br>16<br>49 | 0.0<br>36<br>20<br>19<br>42 | 0.0<br>26<br>44<br>79<br>86 | 88/6356/6387/2042/80206/2316/4131/91663/89795/91624/50507/5156/5159/90102/130271/10769/5999/11075/7043/7168 | 2<br>0 |
| B<br>P | G<br>O:<br>00<br>01<br>65<br>9 | temperature<br>homeostasis                           | 10<br>/4<br>08 | 17<br>2/<br>17<br>91<br>3 | 0.0<br>06<br>15<br>18<br>21 | 0.0<br>36<br>74<br>54<br>51 | 0.0<br>26<br>84<br>50<br>56 | 9370/857/1734/2303/3953/4237/4883/56034/5743/23090                                                          | 1<br>0 |
| B<br>P | G<br>O:<br>00<br>07<br>41<br>6 | synapse assembly                                     | 10<br>/4<br>08 | 17<br>2/<br>17<br>91<br>3 | 0.0<br>06<br>15<br>18<br>21 | 0.0<br>36<br>74<br>54<br>51 | 0.0<br>26<br>84<br>50<br>56 | 1000/23768/2239/4131/9379/4915/5789/139065/27286/7058                                                       | 1<br>0 |
| B<br>P | G<br>O:<br>01<br>10<br>05<br>3 | regulation of actin<br>filament organization         | 12<br>/4<br>08 | 22<br>8/<br>17<br>91<br>3 | 0.0<br>06<br>21<br>86<br>13 | 0.0<br>36<br>98<br>31<br>23 | 0.0<br>27<br>01<br>86<br>91 | 88/6356/6387/80206/2316/91663/50507/90102/130271/5999/7043/7168                                             | 1<br>2 |
| B<br>P | G<br>O:<br>00<br>34<br>28<br>4 | response to<br>monosaccharide                        | 11<br>/4<br>08 | 20<br>0/<br>17<br>91<br>3 | 0.0<br>06<br>27<br>43<br>17 | 0.0<br>36<br>98<br>31<br>23 | 0.0<br>27<br>01<br>86<br>91 | 9370/55107/1292/2621/8660/3956/50507/5743/5176/6678/7057                                                    | 1<br>1 |
| B<br>P | G<br>O:<br>00<br>10<br>71<br>5 | regulation of<br>extracellular matrix<br>disassembly | 3/<br>40<br>8  | 17<br>/1<br>79<br>13      | 0.0<br>06<br>28<br>95<br>8  | 0.0<br>36<br>98<br>31<br>23 | 0.0<br>27<br>01<br>86<br>91 | 4921/2191/10630                                                                                             | 3      |
| B<br>P | G<br>O:<br>00                  | negative regulation of<br>bone mineralization        | 3/<br>40<br>8  | 17<br>/1<br>79            | 0.0<br>06<br>28             | 0.0<br>36<br>98             | 0.0<br>27<br>01             | 1893/5167/26585                                                                                             | 3      |

|        |                                |                                                           |               |                      |                            |                             |                             |                 |   |
|--------|--------------------------------|-----------------------------------------------------------|---------------|----------------------|----------------------------|-----------------------------|-----------------------------|-----------------|---|
|        | 30<br>50<br>2                  |                                                           |               | 13                   | 95<br>8                    | 31<br>23                    | 86<br>91                    |                 |   |
| B<br>P | G<br>O:<br>00<br>35<br>31<br>3 | wound healing,<br>spreading of epidermal<br>cells         | 3/<br>40<br>8 | 17<br>/1<br>79<br>13 | 0.0<br>06<br>28<br>95<br>8 | 0.0<br>36<br>98<br>31<br>23 | 0.0<br>27<br>01<br>86<br>91 | 1289/3678/90102 | 3 |
| B<br>P | G<br>O:<br>00<br>55<br>00<br>3 | cardiac myofibril<br>assembly                             | 3/<br>40<br>8 | 17<br>/1<br>79<br>13 | 0.0<br>06<br>28<br>95<br>8 | 0.0<br>36<br>98<br>31<br>23 | 0.0<br>27<br>01<br>86<br>91 | 80206/5156/5159 | 3 |
| B<br>P | G<br>O:<br>00<br>60<br>00<br>4 | reflex                                                    | 3/<br>40<br>8 | 17<br>/1<br>79<br>13 | 0.0<br>06<br>28<br>95<br>8 | 0.0<br>36<br>98<br>31<br>23 | 0.0<br>27<br>01<br>86<br>91 | 220/2743/255743 | 3 |
| B<br>P | G<br>O:<br>00<br>61<br>29<br>8 | retina vasculature<br>development in<br>camera-type eye   | 3/<br>40<br>8 | 17<br>/1<br>79<br>13 | 0.0<br>06<br>28<br>95<br>8 | 0.0<br>36<br>98<br>31<br>23 | 0.0<br>27<br>01<br>86<br>91 | 1545/5156/5159  | 3 |
| B<br>P | G<br>O:<br>00<br>61<br>31<br>8 | renal filtration cell<br>differentiation                  | 3/<br>40<br>8 | 17<br>/1<br>79<br>13 | 0.0<br>06<br>28<br>95<br>8 | 0.0<br>36<br>98<br>31<br>23 | 0.0<br>27<br>01<br>86<br>91 | 9370/2303/7490  | 3 |
| B<br>P | G<br>O:<br>00<br>72<br>11<br>2 | glomerular visceral<br>epithelial cell<br>differentiation | 3/<br>40<br>8 | 17<br>/1<br>79<br>13 | 0.0<br>06<br>28<br>95<br>8 | 0.0<br>36<br>98<br>31<br>23 | 0.0<br>27<br>01<br>86<br>91 | 9370/2303/7490  | 3 |

|        |                                |                                                   |                |                           |                             |                             |                             |                                                                    |        |
|--------|--------------------------------|---------------------------------------------------|----------------|---------------------------|-----------------------------|-----------------------------|-----------------------------|--------------------------------------------------------------------|--------|
| B<br>P | G<br>O:<br>00<br>48<br>51<br>1 | rhythmic process                                  | 14<br>/4<br>08 | 28<br>7/<br>17<br>91<br>3 | 0.0<br>06<br>32<br>49<br>98 | 0.0<br>37<br>13<br>35<br>44 | 0.0<br>27<br>12<br>85<br>85 | 9370/558/658/3037/3624/687/4327/4915/5156/5054/5176/7042/7043/7291 | 1<br>4 |
| B<br>P | G<br>O:<br>00<br>48<br>33<br>2 | mesoderm morphogenesis                            | 6/<br>40<br>8  | 73<br>/1<br>79<br>13      | 0.0<br>06<br>34<br>47<br>67 | 0.0<br>37<br>19<br>17<br>64 | 0.0<br>27<br>17<br>11<br>18 | 2138/2260/2303/3624/3690/6423                                      | 6      |
| B<br>P | G<br>O:<br>00<br>51<br>89<br>7 | positive regulation of protein kinase B signaling | 10<br>/4<br>08 | 17<br>3/<br>17<br>91<br>3 | 0.0<br>06<br>40<br>09<br>84 | 0.0<br>37<br>39<br>75<br>13 | 0.0<br>27<br>32<br>14<br>31 | 114897/2260/2621/3082/3488/8660/50507/5156/5159/7057               | 1<br>0 |
| B<br>P | G<br>O:<br>00<br>70<br>61<br>3 | regulation of protein processing                  | 10<br>/4<br>08 | 17<br>3/<br>17<br>91<br>3 | 0.0<br>06<br>40<br>09<br>84 | 0.0<br>37<br>39<br>75<br>13 | 0.0<br>27<br>32<br>14<br>31 | 715/716/3075/2619/85409/5627/5054/5270/10418/7057                  | 1<br>0 |
| B<br>P | G<br>O:<br>00<br>10<br>09<br>2 | specification of animal organ identity            | 4/<br>40<br>8  | 33<br>/1<br>79<br>13      | 0.0<br>06<br>43<br>72<br>69 | 0.0<br>37<br>39<br>75<br>13 | 0.0<br>27<br>32<br>14<br>31 | 8313/2260/2737/7472                                                | 4      |
| B<br>P | G<br>O:<br>00<br>10<br>83<br>7 | regulation of keratinocyte proliferation          | 4/<br>40<br>8  | 33<br>/1<br>79<br>13      | 0.0<br>06<br>43<br>72<br>69 | 0.0<br>37<br>39<br>75<br>13 | 0.0<br>27<br>32<br>14<br>31 | 3037/687/5587/6591                                                 | 4      |
| B<br>P | G<br>O:<br>19                  | apoptotic process involved in development         | 4/<br>40<br>8  | 33<br>/1<br>79            | 0.0<br>06<br>43             | 0.0<br>37<br>39             | 0.0<br>27<br>32             | 1410/2303/9464/7042                                                | 4      |

|        |                                |                                                          |                |                           |                             |                             |                             |                                                                            |        |
|--------|--------------------------------|----------------------------------------------------------|----------------|---------------------------|-----------------------------|-----------------------------|-----------------------------|----------------------------------------------------------------------------|--------|
|        | 02<br>74<br>2                  |                                                          |                | 13                        | 72<br>69                    | 75<br>13                    | 14<br>31                    |                                                                            |        |
| B<br>P | G<br>O:<br>00<br>03<br>17<br>9 | heart valve<br>morphogenesis                             | 5/<br>40<br>8  | 52<br>/1<br>79<br>13      | 0.0<br>06<br>45<br>91<br>2  | 0.0<br>37<br>39<br>75<br>13 | 0.0<br>27<br>32<br>14<br>31 | 11117/2702/6591/7042/7291                                                  | 5      |
| B<br>P | G<br>O:<br>00<br>60<br>35<br>0 | endochondral bone<br>morphogenesis                       | 5/<br>40<br>8  | 52<br>/1<br>79<br>13      | 0.0<br>06<br>45<br>91<br>2  | 0.0<br>37<br>39<br>75<br>13 | 0.0<br>27<br>32<br>14<br>31 | 8313/658/1277/1311/6781                                                    | 5      |
| B<br>P | G<br>O:<br>00<br>71<br>32<br>0 | cellular response to<br>cAMP                             | 5/<br>40<br>8  | 52<br>/1<br>79<br>13      | 0.0<br>06<br>45<br>91<br>2  | 0.0<br>37<br>39<br>75<br>13 | 0.0<br>27<br>32<br>14<br>31 | 9370/3488/50507/6781/7490                                                  | 5      |
| B<br>P | G<br>O:<br>00<br>03<br>00<br>2 | regionalization                                          | 15<br>/4<br>08 | 31<br>8/<br>17<br>91<br>3 | 0.0<br>06<br>48<br>90<br>56 | 0.0<br>37<br>51<br>33<br>03 | 0.0<br>27<br>40<br>60<br>24 | 8313/658/2260/2303/2736/2737/26585/4223/8828/5125/4920/6423/9096/7472/7490 | 1<br>5 |
| B<br>P | G<br>O:<br>00<br>34<br>76<br>6 | negative regulation of<br>ion transmembrane<br>transport | 7/<br>40<br>8  | 97<br>/1<br>79<br>13      | 0.0<br>06<br>70<br>39<br>74 | 0.0<br>38<br>66<br>68<br>29 | 0.0<br>28<br>24<br>87<br>53 | 88/857/2669/8660/5999/7057/7291                                            | 7      |
| B<br>P | G<br>O:<br>00<br>70<br>37<br>1 | ERK1 and ERK2<br>cascade                                 | 14<br>/4<br>08 | 28<br>9/<br>17<br>91<br>3 | 0.0<br>06<br>70<br>90<br>79 | 0.0<br>38<br>66<br>68<br>29 | 0.0<br>28<br>24<br>87<br>53 | 9370/9590/6356/11117/2335/2621/9464/3357/3976/50507/255743/5156/5159/7078  | 1<br>4 |



|        |                                |                                                              |                |                           |                             |                             |                             |                                                                      |        |
|--------|--------------------------------|--------------------------------------------------------------|----------------|---------------------------|-----------------------------|-----------------------------|-----------------------------|----------------------------------------------------------------------|--------|
| B<br>P | G<br>O:<br>00<br>21<br>67<br>5 | nerve development                                            | 6/<br>40<br>8  | 74<br>/1<br>79<br>13      | 0.0<br>06<br>77<br>54<br>47 | 0.0<br>38<br>98<br>98<br>05 | 0.0<br>28<br>48<br>47<br>1  | 2737/8828/91584/5270/23213/55959                                     | 6      |
| B<br>P | G<br>O:<br>00<br>32<br>36<br>8 | regulation of lipid transport                                | 8/<br>40<br>8  | 12<br>2/<br>17<br>91<br>3 | 0.0<br>06<br>83<br>48<br>76 | 0.0<br>39<br>21<br>22<br>46 | 0.0<br>28<br>64<br>72<br>17 | 9370/185/114897/1588/8660/3690/5360/7057                             | 8      |
| B<br>P | G<br>O:<br>00<br>34<br>76<br>3 | negative regulation of transmembrane transport               | 8/<br>40<br>8  | 12<br>2/<br>17<br>91<br>3 | 0.0<br>06<br>83<br>48<br>76 | 0.0<br>39<br>21<br>22<br>46 | 0.0<br>28<br>64<br>72<br>17 | 88/857/5167/2669/8660/5999/7057/7291                                 | 8      |
| B<br>P | G<br>O:<br>00<br>10<br>76<br>9 | regulation of cell morphogenesis involved in differentiation | 13<br>/4<br>08 | 26<br>0/<br>17<br>91<br>3 | 0.0<br>06<br>84<br>94<br>42 | 0.0<br>39<br>23<br>61<br>82 | 0.0<br>28<br>66<br>47<br>04 | 6387/2316/2335/3037/4131/91663/4915/10630/91584/10631/5789/6383/7070 | 1<br>3 |
| B<br>P | G<br>O:<br>19<br>03<br>31<br>7 | regulation of protein maturation                             | 10<br>/4<br>08 | 17<br>5/<br>17<br>91<br>3 | 0.0<br>06<br>92<br>27<br>98 | 0.0<br>39<br>59<br>63<br>06 | 0.0<br>28<br>92<br>78       | 715/716/3075/2619/85409/5627/5054/5270/10418/7057                    | 1<br>0 |
| B<br>P | G<br>O:<br>00<br>60<br>42<br>1 | positive regulation of heart growth                          | 5/<br>40<br>8  | 53<br>/1<br>79<br>13      | 0.0<br>07<br>00<br>16<br>66 | 0.0<br>39<br>98<br>68<br>23 | 0.0<br>29<br>21<br>30<br>99 | 2260/2627/7472/7490/23414                                            | 5      |
| B<br>P | G<br>O:<br>00                  | regulation of heart rate                                     | 7/<br>40<br>8  | 98<br>/1<br>79            | 0.0<br>07<br>08             | 0.0<br>40<br>38             | 0.0<br>29<br>50             | 552/781/857/2702/5999/6330/7168                                      | 7      |

|        |                                |                                                                   |               |                           |                             |                             |                             |                                               |   |
|--------|--------------------------------|-------------------------------------------------------------------|---------------|---------------------------|-----------------------------|-----------------------------|-----------------------------|-----------------------------------------------|---|
|        | 02<br>02<br>7                  |                                                                   |               | 13                        | 23<br>39                    | 64<br>47                    | 50<br>52                    |                                               |   |
| B<br>P | G<br>O:<br>00<br>10<br>46<br>4 | regulation of<br>mesenchymal cell<br>proliferation                | 4/<br>40<br>8 | 34<br>/1<br>79<br>13      | 0.0<br>07<br>16<br>68<br>3  | 0.0<br>40<br>45<br>56<br>28 | 0.0<br>29<br>55<br>55<br>93 | 2260/8660/5396/7472                           | 4 |
| B<br>P | G<br>O:<br>00<br>10<br>57<br>4 | regulation of vascular<br>endothelial growth<br>factor production | 4/<br>40<br>8 | 34<br>/1<br>79<br>13      | 0.0<br>07<br>16<br>68<br>3  | 0.0<br>40<br>45<br>56<br>28 | 0.0<br>29<br>55<br>55<br>93 | 1545/5743/23213/55959                         | 4 |
| B<br>P | G<br>O:<br>00<br>35<br>90<br>9 | aorta morphogenesis                                               | 4/<br>40<br>8 | 34<br>/1<br>79<br>13      | 0.0<br>07<br>16<br>68<br>3  | 0.0<br>40<br>45<br>56<br>28 | 0.0<br>29<br>55<br>55<br>93 | 1281/2138/5159/7042                           | 4 |
| B<br>P | G<br>O:<br>00<br>43<br>27<br>6 | anoikis                                                           | 4/<br>40<br>8 | 34<br>/1<br>79<br>13      | 0.0<br>07<br>16<br>68<br>3  | 0.0<br>40<br>45<br>56<br>28 | 0.0<br>29<br>55<br>55<br>93 | 857/3678/4915/6591                            | 4 |
| B<br>P | G<br>O:<br>00<br>01<br>50<br>8 | action potential                                                  | 8/<br>40<br>8 | 12<br>3/<br>17<br>91<br>3 | 0.0<br>07<br>16<br>94<br>87 | 0.0<br>40<br>45<br>56<br>28 | 0.0<br>29<br>55<br>55<br>93 | 781/857/2316/2702/23704/3764/4915/6330        | 8 |
| B<br>P | G<br>O:<br>00<br>01<br>73<br>6 | establishment of planar<br>polarity                               | 8/<br>40<br>8 | 12<br>3/<br>17<br>91<br>3 | 0.0<br>07<br>16<br>94<br>87 | 0.0<br>40<br>45<br>56<br>28 | 0.0<br>29<br>55<br>55<br>93 | 115908/51339/2239/10082/144165/4919/4920/6423 | 8 |

|        |                                |                                               |                |                           |                             |                             |                             |                                                                     |        |
|--------|--------------------------------|-----------------------------------------------|----------------|---------------------------|-----------------------------|-----------------------------|-----------------------------|---------------------------------------------------------------------|--------|
| B<br>P | G<br>O:<br>00<br>07<br>16<br>4 | establishment of tissue<br>polarity           | 8/<br>40<br>8  | 12<br>3/<br>17<br>91<br>3 | 0.0<br>07<br>16<br>94<br>87 | 0.0<br>40<br>45<br>56<br>28 | 0.0<br>29<br>55<br>55<br>93 | 115908/51339/2239/10082/144165/4919/4920/6423                       | 8      |
| B<br>P | G<br>O:<br>00<br>30<br>10<br>0 | regulation of<br>endocytosis                  | 13<br>/4<br>08 | 26<br>2/<br>17<br>91<br>3 | 0.0<br>07<br>28<br>48<br>84 | 0.0<br>41<br>04<br>54<br>26 | 0.0<br>29<br>98<br>64<br>81 | 9370/558/857/1012/1759/2042/2621/26585/3690/5587/5054/6424/84251    | 1<br>3 |
| B<br>P | G<br>O:<br>19<br>03<br>52<br>2 | regulation of blood<br>circulation            | 14<br>/4<br>08 | 29<br>2/<br>17<br>91<br>3 | 0.0<br>07<br>31<br>99<br>17 | 0.0<br>41<br>18<br>13<br>5  | 0.0<br>30<br>08<br>57<br>83 | 10060/185/552/781/857/10699/2316/2702/5743/5999/6330/6781/7042/7168 | 1<br>4 |
| B<br>P | G<br>O:<br>00<br>60<br>97<br>7 | coronary vasculature<br>morphogenesis         | 3/<br>40<br>8  | 18<br>/1<br>79<br>13      | 0.0<br>07<br>42<br>15<br>28 | 0.0<br>41<br>50<br>55<br>8  | 0.0<br>30<br>32<br>26<br>55 | 9464/5159/6444                                                      | 3      |
| B<br>P | G<br>O:<br>00<br>71<br>37<br>1 | cellular response to<br>gonadotropin stimulus | 3/<br>40<br>8  | 18<br>/1<br>79<br>13      | 0.0<br>07<br>42<br>15<br>28 | 0.0<br>41<br>50<br>55<br>8  | 0.0<br>30<br>32<br>26<br>55 | 2627/3624/7490                                                      | 3      |
| B<br>P | G<br>O:<br>00<br>72<br>31<br>1 | glomerular epithelial<br>cell differentiation | 3/<br>40<br>8  | 18<br>/1<br>79<br>13      | 0.0<br>07<br>42<br>15<br>28 | 0.0<br>41<br>50<br>55<br>8  | 0.0<br>30<br>32<br>26<br>55 | 9370/2303/7490                                                      | 3      |
| B<br>P | G<br>O:<br>00                  | craniofacial suture<br>morphogenesis          | 3/<br>40<br>8  | 18<br>/1<br>79            | 0.0<br>07<br>42             | 0.0<br>41<br>50             | 0.0<br>30<br>32             | 2737/7043/7291                                                      | 3      |

|        |                                |                                                            |                |                           |                             |                             |                             |                                                                                       |        |
|--------|--------------------------------|------------------------------------------------------------|----------------|---------------------------|-----------------------------|-----------------------------|-----------------------------|---------------------------------------------------------------------------------------|--------|
|        | 97<br>09<br>4                  |                                                            |                | 13                        | 15<br>28                    | 55<br>8                     | 26<br>55                    |                                                                                       |        |
| B<br>P | G<br>O:<br>00<br>21<br>95<br>3 | central nervous system<br>neuron differentiation           | 10<br>/4<br>08 | 17<br>7/<br>17<br>91<br>3 | 0.0<br>07<br>47<br>69<br>94 | 0.0<br>41<br>75<br>39<br>23 | 0.0<br>30<br>50<br>40<br>86 | 1009/2736/2737/3624/8828/4915/91584/6423/6695/7472                                    | 1<br>0 |
| B<br>P | G<br>O:<br>00<br>02<br>01<br>1 | morphogenesis of an<br>epithelial sheet                    | 5/<br>40<br>8  | 54<br>/1<br>79<br>13      | 0.0<br>07<br>57<br>52<br>6  | 0.0<br>42<br>17<br>78<br>87 | 0.0<br>30<br>81<br>38<br>21 | 1289/2316/3678/10630/90102                                                            | 5      |
| B<br>P | G<br>O:<br>19<br>04<br>64<br>5 | response to<br>amyloid-beta                                | 5/<br>40<br>8  | 54<br>/1<br>79<br>13      | 0.0<br>07<br>57<br>52<br>6  | 0.0<br>42<br>17<br>78<br>87 | 0.0<br>30<br>81<br>38<br>21 | 773/781/1759/4313/4314                                                                | 5      |
| B<br>P | G<br>O:<br>00<br>45<br>66<br>6 | positive regulation of<br>neuron differentiation           | 16<br>/4<br>08 | 35<br>5/<br>17<br>91<br>3 | 0.0<br>07<br>66<br>40<br>4  | 0.0<br>42<br>60<br>93<br>52 | 0.0<br>31<br>12<br>90<br>35 | 1272/6387/1809/2042/2260/2335/2736/3082/4131/4915/5587/5789/5176/11075/55714<br>/7077 | 1<br>6 |
| B<br>P | G<br>O:<br>00<br>46<br>54<br>5 | development of primary<br>female sexual<br>characteristics | 7/<br>40<br>8  | 10<br>0/<br>17<br>91<br>3 | 0.0<br>07<br>88<br>62<br>52 | 0.0<br>43<br>78<br>02<br>97 | 0.0<br>31<br>98<br>44<br>9  | 658/1588/3624/4327/5156/7490/23414                                                    | 7      |
| B<br>P | G<br>O:<br>00<br>01<br>89<br>3 | maternal placenta<br>development                           | 4/<br>40<br>8  | 35<br>/1<br>79<br>13      | 0.0<br>07<br>94<br>89<br>13 | 0.0<br>43<br>99<br>87<br>5  | 0.0<br>32<br>14<br>40<br>85 | 3976/5740/5743/6781                                                                   | 4      |

|        |                                |                                                                                      |               |                           |                             |                             |                             |                                               |   |
|--------|--------------------------------|--------------------------------------------------------------------------------------|---------------|---------------------------|-----------------------------|-----------------------------|-----------------------------|-----------------------------------------------|---|
| B<br>P | G<br>O:<br>00<br>07<br>15<br>7 | heterophilic cell-cell<br>adhesion via plasma<br>membrane cell<br>adhesion molecules | 4/<br>40<br>8 | 35<br>/1<br>79<br>13      | 0.0<br>07<br>94<br>89<br>13 | 0.0<br>43<br>99<br>87<br>5  | 0.0<br>32<br>14<br>40<br>85 | 1000/3678/5789/91179                          | 4 |
| B<br>P | G<br>O:<br>19<br>90<br>84<br>5 | adaptive<br>thermogenesis                                                            | 9/<br>40<br>8 | 15<br>2/<br>17<br>91<br>3 | 0.0<br>08<br>14<br>32<br>79 | 0.0<br>45<br>00<br>86<br>08 | 0.0<br>32<br>88<br>18<br>55 | 9370/857/1734/2303/3953/4237/4883/56034/23090 | 9 |
| B<br>P | G<br>O:<br>00<br>03<br>22<br>9 | ventricular cardiac<br>muscle tissue<br>development                                  | 5/<br>40<br>8 | 55<br>/1<br>79<br>13      | 0.0<br>08<br>18<br>07<br>63 | 0.0<br>45<br>08<br>37<br>66 | 0.0<br>32<br>93<br>67<br>63 | 1301/2303/7042/7168/23414                     | 5 |
| B<br>P | G<br>O:<br>00<br>31<br>10<br>2 | neuron projection<br>regeneration                                                    | 5/<br>40<br>8 | 55<br>/1<br>79<br>13      | 0.0<br>08<br>18<br>07<br>63 | 0.0<br>45<br>08<br>37<br>66 | 0.0<br>32<br>93<br>67<br>63 | 3082/4131/5396/7070/3371                      | 5 |
| B<br>P | G<br>O:<br>00<br>48<br>70<br>8 | astrocyte differentiation                                                            | 6/<br>40<br>8 | 77<br>/1<br>79<br>13      | 0.0<br>08<br>19<br>44<br>72 | 0.0<br>45<br>09<br>34<br>86 | 0.0<br>32<br>94<br>38<br>65 | 3976/4919/4920/5270/10100/7431                | 6 |
| B<br>P | G<br>O:<br>00<br>01<br>50<br>2 | cartilage condensation                                                               | 3/<br>40<br>8 | 19<br>/1<br>79<br>13      | 0.0<br>08<br>66<br>61<br>48 | 0.0<br>47<br>20<br>73<br>72 | 0.0<br>34<br>48<br>82<br>02 | 658/1301/4920                                 | 3 |
| B<br>P | G<br>O:<br>00                  | regulation of systemic<br>arterial blood pressure<br>by circulatory                  | 3/<br>40<br>8 | 19<br>/1<br>79            | 0.0<br>08<br>66             | 0.0<br>47<br>20             | 0.0<br>34<br>48             | 1066/2702/5125                                | 3 |

|        |                                |                                                  |               |                      |                             |                             |                             |                               |   |
|--------|--------------------------------|--------------------------------------------------|---------------|----------------------|-----------------------------|-----------------------------|-----------------------------|-------------------------------|---|
|        | 01<br>99<br>1                  | renin-angiotensin                                |               | 13                   | 61<br>48                    | 73<br>72                    | 82<br>02                    |                               |   |
| B<br>P | G<br>O:<br>00<br>02<br>54<br>4 | chronic inflammatory<br>response                 | 3/<br>40<br>8 | 19<br>/1<br>79<br>13 | 0.0<br>08<br>66<br>61<br>48 | 0.0<br>47<br>20<br>73<br>72 | 0.0<br>34<br>48<br>82<br>02 | 6356/1588/7057                | 3 |
| B<br>P | G<br>O:<br>00<br>03<br>21<br>5 | cardiac right ventricle<br>morphogenesis         | 3/<br>40<br>8 | 19<br>/1<br>79<br>13 | 0.0<br>08<br>66<br>61<br>48 | 0.0<br>47<br>20<br>73<br>72 | 0.0<br>34<br>48<br>82<br>02 | 9464/7042/23414               | 3 |
| B<br>P | G<br>O:<br>00<br>32<br>89<br>1 | negative regulation of<br>organic acid transport | 3/<br>40<br>8 | 19<br>/1<br>79<br>13 | 0.0<br>08<br>66<br>61<br>48 | 0.0<br>47<br>20<br>73<br>72 | 0.0<br>34<br>48<br>82<br>02 | 8660/5999/7057                | 3 |
| B<br>P | G<br>O:<br>00<br>72<br>07<br>7 | renal vesicle<br>morphogenesis                   | 3/<br>40<br>8 | 19<br>/1<br>79<br>13 | 0.0<br>08<br>66<br>61<br>48 | 0.0<br>47<br>20<br>73<br>72 | 0.0<br>34<br>48<br>82<br>02 | 26585/55083/3976              | 3 |
| B<br>P | G<br>O:<br>00<br>90<br>28<br>0 | positive regulation of<br>calcium ion import     | 3/<br>40<br>8 | 19<br>/1<br>79<br>13 | 0.0<br>08<br>66<br>61<br>48 | 0.0<br>47<br>20<br>73<br>72 | 0.0<br>34<br>48<br>82<br>02 | 6387/5159/6781                | 3 |
| B<br>P | G<br>O:<br>00<br>01<br>57<br>0 | vasculogenesis                                   | 6/<br>40<br>8 | 78<br>/1<br>79<br>13 | 0.0<br>08<br>71<br>16<br>21 | 0.0<br>47<br>31<br>85<br>16 | 0.0<br>34<br>56<br>94       | 857/3037/4915/5159/7490/23414 | 6 |

|        |                                |                                                         |                |                           |                             |                             |                             |                                                        |        |
|--------|--------------------------------|---------------------------------------------------------|----------------|---------------------------|-----------------------------|-----------------------------|-----------------------------|--------------------------------------------------------|--------|
| B<br>P | G<br>O:<br>00<br>55<br>01<br>3 | cardiac muscle cell<br>development                      | 6/<br>40<br>8  | 78<br>/1<br>79<br>13      | 0.0<br>08<br>71<br>16<br>21 | 0.0<br>47<br>31<br>85<br>16 | 0.0<br>34<br>56<br>94       | 88/80206/5156/5159/5999/6444                           | 6      |
| B<br>P | G<br>O:<br>00<br>10<br>57<br>3 | vascular endothelial<br>growth factor<br>production     | 4/<br>40<br>8  | 36<br>/1<br>79<br>13      | 0.0<br>08<br>78<br>49<br>87 | 0.0<br>47<br>51<br>19<br>27 | 0.0<br>34<br>71<br>07       | 1545/5743/23213/55959                                  | 4      |
| B<br>P | G<br>O:<br>00<br>50<br>98<br>2 | detection of mechanical<br>stimulus                     | 4/<br>40<br>8  | 36<br>/1<br>79<br>13      | 0.0<br>08<br>78<br>49<br>87 | 0.0<br>47<br>51<br>19<br>27 | 0.0<br>34<br>71<br>07       | 1301/6387/63895/5270                                   | 4      |
| B<br>P | G<br>O:<br>00<br>86<br>09<br>1 | regulation of heart rate<br>by cardiac conduction       | 4/<br>40<br>8  | 36<br>/1<br>79<br>13      | 0.0<br>08<br>78<br>49<br>87 | 0.0<br>47<br>51<br>19<br>27 | 0.0<br>34<br>71<br>07       | 781/857/2702/6330                                      | 4      |
| B<br>P | G<br>O:<br>00<br>86<br>06<br>5 | cell communication<br>involved in cardiac<br>conduction | 5/<br>40<br>8  | 56<br>/1<br>79<br>13      | 0.0<br>08<br>81<br>90<br>2  | 0.0<br>47<br>62<br>77<br>53 | 0.0<br>34<br>79<br>53<br>19 | 781/857/2316/2702/6330                                 | 5      |
| B<br>P | G<br>O:<br>00<br>46<br>77<br>7 | protein<br>autophosphorylation                          | 11<br>/4<br>08 | 21<br>0/<br>17<br>91<br>3 | 0.0<br>08<br>91<br>01<br>4  | 0.0<br>48<br>05<br>11<br>13 | 0.0<br>35<br>10<br>46<br>12 | 9370/857/4921/5167/2260/26585/4915/5156/5159/5587/7070 | 1<br>1 |
| B<br>P | G<br>O:<br>00                  | blood vessel<br>endothelial cell<br>migration           | 10<br>/4<br>08 | 18<br>2/<br>17            | 0.0<br>09<br>01             | 0.0<br>48<br>53             | 0.0<br>35<br>45             | 2260/2303/26585/57608/4223/10769/5587/5743/27286/7057  | 1<br>0 |

|        |                                |                                                                                                       |                |                           |                             |                                   |                             |                                                                                                 |        |
|--------|--------------------------------|-------------------------------------------------------------------------------------------------------|----------------|---------------------------|-----------------------------|-----------------------------------|-----------------------------|-------------------------------------------------------------------------------------------------|--------|
|        | 43<br>53<br>4                  |                                                                                                       |                | 91<br>3                   | 26<br>19                    | 44<br>34                          | 77<br>11                    |                                                                                                 |        |
| B<br>P | G<br>O:<br>00<br>46<br>39<br>4 | carboxylic acid<br>biosynthetic process                                                               | 18<br>/4<br>08 | 42<br>6/<br>17<br>91<br>3 | 0.0<br>09<br>18<br>70<br>94 | 0.0<br>49<br>39<br>08<br>33       | 0.0<br>36<br>08<br>33<br>59 | 9370/220/552/633/23743/1464/9420/1634/29940/92126/2687/3037/340895/4942/5352<br>/5740/5743/1462 | 1<br>8 |
| B<br>P | G<br>O:<br>00<br>21<br>91<br>5 | neural tube<br>development                                                                            | 9/<br>40<br>8  | 15<br>5/<br>17<br>91<br>3 | 0.0<br>09<br>19<br>78<br>13 | 0.0<br>49<br>39<br>08<br>33       | 0.0<br>36<br>08<br>33<br>59 | 115908/51339/2736/2737/144165/57167/6423/7042/7291                                              | 9      |
| B<br>P | G<br>O:<br>00<br>32<br>52<br>6 | response to retinoic<br>acid                                                                          | 7/<br>40<br>8  | 10<br>3/<br>17<br>91<br>3 | 0.0<br>09<br>21<br>56<br>67 | 0.0<br>49<br>39<br>08<br>92<br>95 | 0.0<br>36<br>08<br>95<br>53 | 1277/2042/3490/5159/5176/3371/7472                                                              | 7      |
| B<br>P | G<br>O:<br>00<br>01<br>70<br>8 | cell fate specification                                                                               | 6/<br>40<br>8  | 79<br>/1<br>79<br>13      | 0.0<br>09<br>25<br>17<br>36 | 0.0<br>49<br>39<br>08<br>92<br>95 | 0.0<br>36<br>08<br>95<br>53 | 2138/2260/2736/2737/6423/26011                                                                  | 6      |
| B<br>P | G<br>O:<br>00<br>43<br>15<br>4 | negative regulation of<br>cysteine-type<br>endopeptidase activity<br>involved in apoptotic<br>process | 6/<br>40<br>8  | 79<br>/1<br>79<br>13      | 0.0<br>09<br>25<br>17<br>36 | 0.0<br>49<br>39<br>08<br>92<br>95 | 0.0<br>36<br>08<br>95<br>53 | 1410/2621/3082/5743/6423/7057                                                                   | 6      |
| B<br>P | G<br>O:<br>00<br>55<br>02<br>1 | regulation of cardiac<br>muscle tissue growth                                                         | 6/<br>40<br>8  | 79<br>/1<br>79<br>13      | 0.0<br>09<br>25<br>17<br>36 | 0.0<br>49<br>39<br>08<br>92<br>95 | 0.0<br>36<br>08<br>95<br>53 | 2260/2627/3776/5999/7472/23414                                                                  | 6      |



|        |                                |                                          |                     |                           |                      |                      |                      |                                                                                                                                                                                                                                                                                                                                                                                                                                                                                                                                                                    |             |
|--------|--------------------------------|------------------------------------------|---------------------|---------------------------|----------------------|----------------------|----------------------|--------------------------------------------------------------------------------------------------------------------------------------------------------------------------------------------------------------------------------------------------------------------------------------------------------------------------------------------------------------------------------------------------------------------------------------------------------------------------------------------------------------------------------------------------------------------|-------------|
| C<br>C | G<br>O:<br>00<br>31<br>01<br>2 | extracellular matrix                     | 10<br>3/<br>41<br>9 | 46<br>8/<br>18<br>67<br>8 | 2.2<br>7E<br>-7<br>3 | 7.6<br>2E<br>-7<br>1 | 5.8<br>7E<br>-7<br>1 | 81794/9509/9507/9370/165/23452/3730/54829/633/151887/57124/1012/1000/8483/1300/1301/1303/1306/1307/1277/1278/255631/1281/1289/1290/50509/1291/1292/1293/1295/1296/1311/83716/1464/115908/6387/1634/1805/1893/1842/10085/2202/11117/2162/2199/2200/23768/2331/2335/2239/10082/26585/83872/5654/3490/3956/4015/4016/4017/131578/4053/4060/4237/8076/4320/4327/4313/4314/25878/22795/255743/4958/5118/127435/10631/5549/10216/7837/5919/6383/5054/5270/5176/6423/6678/10418/8406/27286/284297/23213/7042/7043/7045/7057/7058/7060/7076/7077/7078/3371/63923/1462/7472 | 1<br>0<br>3 |
| C<br>C | G<br>O:<br>00<br>62<br>02<br>3 | collagen-containing extracellular matrix | 94<br>/4<br>19      | 39<br>9/<br>18<br>67<br>8 | 1.3<br>1E<br>-6<br>9 | 2.2<br>1E<br>-6<br>7 | 1.7<br>0E<br>-6<br>7 | 81794/9509/9507/9370/165/23452/54829/633/151887/1012/1000/8483/1300/1301/1303/1306/1307/1277/1278/255631/1281/1289/1290/50509/1291/1292/1293/1295/1296/1311/1464/115908/6387/1634/1805/1893/1842/10085/2202/11117/2162/2199/2200/2331/2335/2239/10082/26585/83872/5654/3490/3956/4016/4017/131578/4053/4060/4237/8076/4313/25878/22795/255743/4958/5118/127435/10631/5549/10216/7837/5919/6383/5054/5270/5176/6423/6678/10418/8406/27286/284297/23213/7042/7043/7045/7057/7058/7060/7076/7077/7078/3371/1462/7472                                                  | 9<br>4      |
| C<br>C | G<br>O:<br>00<br>05<br>78<br>8 | endoplasmic reticulum lumen              | 44<br>/4<br>19      | 30<br>6/<br>18<br>67<br>8 | 5.0<br>9E<br>-2<br>3 | 5.7<br>0E<br>-2<br>1 | 4.3<br>9E<br>-2<br>1 | 92949/340075/1000/1066/1300/1301/1303/1306/1307/1277/1278/255631/1281/1289/1290/50509/1291/1292/1293/1295/1296/56975/2200/60681/2326/2335/11167/2621/493869/3488/3490/3956/4148/54587/283208/56034/5743/7857/6383/10418/7057/7076/3371/1462                                                                                                                                                                                                                                                                                                                        | 4<br>4      |
| C<br>C | G<br>O:<br>00<br>05<br>58<br>1 | collagen trimer                          | 26<br>/4<br>19      | 86<br>/1<br>86<br>78      | 1.2<br>9E<br>-2<br>2 | 1.0<br>8E<br>-2<br>0 | 8.3<br>5E<br>-2<br>1 | 9370/114897/1300/1301/1303/1306/1307/1277/1278/255631/1281/1289/1290/50509/1291/1292/1293/1295/1296/81035/115908/1634/11117/4015/4060/51435                                                                                                                                                                                                                                                                                                                                                                                                                        | 2<br>6      |
| C<br>C | G<br>O:<br>00<br>44<br>42<br>0 | extracellular matrix component           | 17<br>/4<br>19      | 47<br>/1<br>86<br>78      | 9.9<br>0E<br>-1<br>7 | 6.6<br>5E<br>-1<br>5 | 5.1<br>3E<br>-1<br>5 | 81794/1301/1303/1306/1277/1278/1281/1289/1290/50509/1295/11117/2200/4060/4237/8076/3371                                                                                                                                                                                                                                                                                                                                                                                                                                                                            | 1<br>7      |
| C<br>C | G<br>O:<br>00<br>05<br>60<br>4 | basement membrane                        | 20<br>/4<br>19      | 91<br>/1<br>86<br>78      | 1.0<br>1E<br>-1<br>4 | 5.6<br>3E<br>-1<br>3 | 4.3<br>4E<br>-1<br>3 | 151887/1306/1289/1295/1296/2200/2335/83872/4016/4017/22795/255743/5176/6678/7045/7058/7060/7076/7078/3371                                                                                                                                                                                                                                                                                                                                                                                                                                                          | 2<br>0      |

|        |                                |                             |                |                           |                      |                      |                      |                                                                                                                                                |        |
|--------|--------------------------------|-----------------------------|----------------|---------------------------|----------------------|----------------------|----------------------|------------------------------------------------------------------------------------------------------------------------------------------------|--------|
| C<br>C | G<br>O:<br>00<br>05<br>58<br>3 | fibrillar collagen trimer   | 8/<br>41<br>9  | 11<br>/1<br>86<br>78      | 9.3<br>4E<br>-1<br>2 | 3.5<br>9E<br>-1<br>0 | 2.7<br>7E<br>-1<br>0 | 1301/1277/1278/1281/1289/1290/50509/4060                                                                                                       | 8      |
| C<br>C | G<br>O:<br>00<br>98<br>64<br>3 | banded collagen fibril      | 8/<br>41<br>9  | 11<br>/1<br>86<br>78      | 9.3<br>4E<br>-1<br>2 | 3.5<br>9E<br>-1<br>0 | 2.7<br>7E<br>-1<br>0 | 1301/1277/1278/1281/1289/1290/50509/4060                                                                                                       | 8      |
| C<br>C | G<br>O:<br>00<br>43<br>29<br>2 | contractile fiber           | 25<br>/4<br>19 | 20<br>9/<br>18<br>67<br>8 | 9.6<br>2E<br>-1<br>2 | 3.5<br>9E<br>-1<br>0 | 2.7<br>7E<br>-1<br>0 | 10060/59/88/113146/115557/800/1410/114907/10979/80206/2316/91156/57158/3764/<br>4313/4620/10398/91624/255743/23022/27295/81493/23345/7168/7169 | 2<br>5 |
| C<br>C | G<br>O:<br>00<br>31<br>09<br>1 | platelet alpha granule      | 17<br>/4<br>19 | 91<br>/1<br>86<br>78      | 1.6<br>8E<br>-1<br>1 | 5.6<br>5E<br>-1<br>0 | 4.3<br>5E<br>-1<br>0 | 88/2162/2335/2621/3082/3671/3690/5099/5627/5054/5270/6678/7042/7043/7057/705<br>8/7076                                                         | 1<br>7 |
| C<br>C | G<br>O:<br>00<br>98<br>64<br>4 | complex of collagen trimers | 9/<br>41<br>9  | 18<br>/1<br>86<br>78      | 5.3<br>7E<br>-1<br>1 | 1.6<br>4E<br>-0<br>9 | 1.2<br>6E<br>-0<br>9 | 1301/1277/1278/1281/1289/1290/50509/1295/4060                                                                                                  | 9      |
| C<br>C | G<br>O:<br>00<br>44<br>44<br>9 | contractile fiber part      | 23<br>/4<br>19 | 19<br>2/<br>18<br>67<br>8 | 6.4<br>1E<br>-1<br>1 | 1.7<br>9E<br>-0<br>9 | 1.3<br>8E<br>-0<br>9 | 10060/59/88/113146/115557/1410/114907/10979/80206/2316/91156/57158/4313/462<br>0/10398/91624/255743/23022/27295/81493/23345/7168/7169          | 2<br>3 |
| C<br>C | G<br>O:<br>00                  | myofibril                   | 23<br>/4<br>19 | 19<br>7/<br>18            | 1.0<br>8E<br>-1      | 2.8<br>0E<br>-0      | 2.1<br>6E<br>-0      | 10060/88/113146/115557/800/1410/114907/10979/80206/2316/91156/57158/3764/43<br>13/4620/10398/91624/23022/27295/81493/23345/7168/7169           | 2<br>3 |

|        |                                |                              |                |                           |                      |                      |                      |                                                                                                                         |        |
|--------|--------------------------------|------------------------------|----------------|---------------------------|----------------------|----------------------|----------------------|-------------------------------------------------------------------------------------------------------------------------|--------|
|        | 30<br>01<br>6                  |                              |                | 67<br>8                   | 0                    | 9                    | 9                    |                                                                                                                         |        |
| C<br>C | G<br>O:<br>00<br>30<br>01<br>7 | sarcomere                    | 21<br>/4<br>19 | 17<br>4/<br>18<br>67<br>8 | 3.8<br>2E<br>-1<br>0 | 9.1<br>6E<br>-0<br>9 | 7.0<br>6E<br>-0<br>9 | 10060/88/113146/115557/1410/114907/10979/80206/2316/91156/57158/4313/4620/10398/91624/23022/27295/81493/23345/7168/7169 | 2<br>1 |
| C<br>C | G<br>O:<br>00<br>31<br>09<br>3 | platelet alpha granule lumen | 13<br>/4<br>19 | 67<br>/1<br>86<br>78      | 2.5<br>6E<br>-0<br>9 | 5.7<br>3E<br>-0<br>8 | 4.4<br>2E<br>-0<br>8 | 88/2162/2335/2621/3082/3671/5627/5054/6678/7042/7043/7057/7076                                                          | 1<br>3 |
| C<br>C | G<br>O:<br>00<br>05<br>79<br>6 | Golgi lumen                  | 15<br>/4<br>19 | 10<br>2/<br>18<br>67<br>8 | 8.4<br>1E<br>-0<br>9 | 1.7<br>7E<br>-0<br>7 | 1.3<br>6E<br>-0<br>7 | 633/1464/1634/2331/2621/2239/10082/4060/4320/4958/5125/5549/5627/6383/1462                                              | 1<br>5 |
| C<br>C | G<br>O:<br>00<br>43<br>20<br>2 | lysosomal lumen              | 13<br>/4<br>19 | 94<br>/1<br>86<br>78      | 1.7<br>6E<br>-0<br>7 | 3.4<br>7E<br>-0<br>6 | 2.6<br>7E<br>-0<br>6 | 633/1464/1513/1634/2331/2239/10082/4060/4958/5159/5549/6383/1462                                                        | 1<br>3 |
| C<br>C | G<br>O:<br>00<br>31<br>67<br>4 | I band                       | 14<br>/4<br>19 | 11<br>6/<br>18<br>67<br>8 | 3.3<br>3E<br>-0<br>7 | 6.2<br>1E<br>-0<br>6 | 4.7<br>9E<br>-0<br>6 | 88/113146/1410/114907/10979/80206/2316/91156/57158/10398/91624/23022/27295/81493                                        | 1<br>4 |
| C<br>C | G<br>O:<br>00<br>30<br>01<br>8 | Z disc                       | 13<br>/4<br>19 | 10<br>6/<br>18<br>67<br>8 | 7.2<br>7E<br>-0<br>7 | 1.2<br>9E<br>-0<br>5 | 9.9<br>1E<br>-0<br>6 | 88/113146/1410/114907/80206/2316/91156/57158/10398/91624/23022/27295/81493                                              | 1<br>3 |

|        |                                |                                  |                |                           |                      |                      |                      |                                                                                                                                                |        |
|--------|--------------------------------|----------------------------------|----------------|---------------------------|----------------------|----------------------|----------------------|------------------------------------------------------------------------------------------------------------------------------------------------|--------|
| C<br>C | G<br>O:<br>00<br>05<br>92<br>5 | focal adhesion                   | 26<br>/4<br>19 | 39<br>7/<br>18<br>67<br>8 | 1.1<br>8E<br>-0<br>6 | 1.9<br>9E<br>-0<br>5 | 1.5<br>3E<br>-0<br>5 | 88/9590/857/1012/1000/1464/4921/2191/10979/2316/23768/22801/3678/3690/9902/91624/50507/23022/5159/90102/5328/91179/7070/3371/7431/165904       | 2<br>6 |
| C<br>C | G<br>O:<br>00<br>05<br>92<br>4 | cell-substrate adherens junction | 26<br>/4<br>19 | 39<br>9/<br>18<br>67<br>8 | 1.3<br>0E<br>-0<br>6 | 2.0<br>8E<br>-0<br>5 | 1.6<br>0E<br>-0<br>5 | 88/9590/857/1012/1000/1464/4921/2191/10979/2316/23768/22801/3678/3690/9902/91624/50507/23022/5159/90102/5328/91179/7070/3371/7431/165904       | 2<br>6 |
| C<br>C | G<br>O:<br>00<br>30<br>05<br>5 | cell-substrate junction          | 26<br>/4<br>19 | 40<br>4/<br>18<br>67<br>8 | 1.6<br>4E<br>-0<br>6 | 2.5<br>0E<br>-0<br>5 | 1.9<br>3E<br>-0<br>5 | 88/9590/857/1012/1000/1464/4921/2191/10979/2316/23768/22801/3678/3690/9902/91624/50507/23022/5159/90102/5328/91179/7070/3371/7431/165904       | 2<br>6 |
| C<br>C | G<br>O:<br>00<br>31<br>25<br>2 | cell leading edge                | 25<br>/4<br>19 | 38<br>4/<br>18<br>67<br>8 | 2.1<br>2E<br>-0<br>6 | 3.0<br>9E<br>-0<br>5 | 2.3<br>8E<br>-0<br>5 | 59/273/84168/1000/1464/1809/2191/10979/3678/3690/57608/24141/91663/23022/8572/10630/90102/130271/8910/23516/11075/7070/26230/7168/7431         | 2<br>5 |
| C<br>C | G<br>O:<br>00<br>15<br>62<br>9 | actin cytoskeleton               | 26<br>/4<br>19 | 43<br>2/<br>18<br>67<br>8 | 5.5<br>5E<br>-0<br>6 | 7.7<br>7E<br>-0<br>5 | 5.9<br>9E<br>-0<br>5 | 59/88/273/794/800/1000/84952/10699/1410/4921/1809/10979/80206/2316/91663/4620/10398/50507/23022/27295/8572/130271/4919/7168/7169/165904        | 2<br>6 |
| C<br>C | G<br>O:<br>00<br>31<br>25<br>8 | lamellipodium membrane           | 6/<br>41<br>9  | 22<br>/1<br>86<br>78      | 6.7<br>6E<br>-0<br>6 | 9.0<br>9E<br>-0<br>5 | 7.0<br>1E<br>-0<br>5 | 84168/1464/2191/10979/3690/10630                                                                                                               | 6      |
| C<br>C | G<br>O:<br>00                  | adherens junction                | 27<br>/4<br>19 | 49<br>6/<br>18            | 2.2<br>4E<br>-0      | 0.0<br>00<br>28      | 0.0<br>00<br>22      | 88/9590/857/1012/1000/1464/4921/2191/10979/2316/23768/22801/3678/3690/57608/9902/91624/50507/23022/5159/90102/5328/91179/7070/3371/7431/165904 | 2<br>7 |

|        |                                |                          |                |                           |                             |                             |                             |                                                                                                     |        |
|--------|--------------------------------|--------------------------|----------------|---------------------------|-----------------------------|-----------------------------|-----------------------------|-----------------------------------------------------------------------------------------------------|--------|
|        | 05<br>91<br>2                  |                          |                | 67<br>8                   | 5                           | 98                          | 33<br>42                    |                                                                                                     |        |
| C<br>C | G<br>O:<br>00<br>30<br>02<br>7 | lamellipodium            | 15<br>/4<br>19 | 19<br>1/<br>18<br>67<br>8 | 2.8<br>1E<br>-0<br>5        | 0.0<br>00<br>34<br>94<br>86 | 0.0<br>00<br>26<br>93<br>41 | 59/84168/1000/1464/1809/2191/10979/3690/23022/8572/10630/130271/23516/11075/<br>26230               | 1<br>5 |
| C<br>C | G<br>O:<br>00<br>31<br>25<br>6 | leading edge<br>membrane | 13<br>/4<br>19 | 15<br>3/<br>18<br>67<br>8 | 4.2<br>3E<br>-0<br>5        | 0.0<br>00<br>50<br>73<br>26 | 0.0<br>00<br>39<br>09<br>84 | 273/84168/1464/2191/10979/3678/3690/57608/24141/10630/8910/7070/7168                                | 1<br>3 |
| C<br>C | G<br>O:<br>00<br>01<br>52<br>7 | microfibril              | 4/<br>41<br>9  | 10<br>/1<br>86<br>78      | 4.7<br>1E<br>-0<br>5        | 0.0<br>00<br>54<br>56<br>81 | 0.0<br>00<br>42<br>05<br>43 | 81794/2200/4237/8076                                                                                | 4      |
| C<br>C | G<br>O:<br>00<br>32<br>43<br>2 | actin filament bundle    | 8/<br>41<br>9  | 59<br>/1<br>86<br>78      | 4.8<br>9E<br>-0<br>5        | 0.0<br>00<br>54<br>73<br>67 | 0.0<br>00<br>42<br>18<br>43 | 1410/10979/10398/50507/8572/4919/7168/165904                                                        | 8      |
| C<br>C | G<br>O:<br>00<br>43<br>23<br>5 | receptor complex         | 18<br>/4<br>19 | 29<br>2/<br>18<br>67<br>8 | 0.0<br>00<br>11<br>37<br>92 | 0.0<br>01<br>23<br>33<br>53 | 0.0<br>00<br>95<br>05<br>17 | 658/11117/2260/2550/2690/2892/22801/3678/3690/3953/84171/255743/8828/4915/93<br>145/91584/5745/4919 | 1<br>8 |
| C<br>C | G<br>O:<br>00<br>42<br>38<br>3 | sarcolemma               | 11<br>/4<br>19 | 12<br>5/<br>18<br>67<br>8 | 0.0<br>00<br>11<br>91<br>25 | 0.0<br>01<br>25<br>08<br>12 | 0.0<br>00<br>96<br>39<br>72 | 113146/633/781/1000/1291/1292/1293/3764/8910/81493/7043                                             | 1<br>1 |

|        |                                |                                      |                |                           |                             |                             |                             |                                                                                                                          |        |
|--------|--------------------------------|--------------------------------------|----------------|---------------------------|-----------------------------|-----------------------------|-----------------------------|--------------------------------------------------------------------------------------------------------------------------|--------|
| C<br>C | G<br>O:<br>00<br>34<br>77<br>4 | secretory granule<br>lumen           | 19<br>/4<br>19 | 32<br>1/<br>18<br>67<br>8 | 0.0<br>00<br>12<br>60<br>44 | 0.0<br>01<br>28<br>33<br>59 | 0.0<br>00<br>98<br>90<br>55 | 88/83716/1893/2162/2335/2621/3082/3671/5122/5627/5919/5054/6678/7042/7043/7057/7076/7077/7078                            | 1<br>9 |
| C<br>C | G<br>O:<br>00<br>05<br>77<br>5 | vacuolar lumen                       | 13<br>/4<br>19 | 17<br>1/<br>18<br>67<br>8 | 0.0<br>00<br>13<br>21<br>44 | 0.0<br>01<br>30<br>58<br>97 | 0.0<br>01<br>00<br>64<br>24 | 633/1464/1513/1634/2331/2239/10082/4060/4958/5159/5549/6383/1462                                                         | 1<br>3 |
| C<br>C | G<br>O:<br>00<br>98<br>79<br>7 | plasma membrane<br>protein complex   | 23<br>/4<br>19 | 45<br>1/<br>18<br>67<br>8 | 0.0<br>00<br>23<br>52<br>42 | 0.0<br>02<br>16<br>08<br>86 | 0.0<br>01<br>66<br>53<br>44 | 10060/658/773/781/1000/11117/2121/132884/2550/2702/2743/2892/22801/3678/3690/3764/3776/255743/93145/6330/6444/8910/84251 | 2<br>3 |
| C<br>C | G<br>O:<br>00<br>60<br>20<br>5 | cytoplasmic vesicle<br>lumen         | 19<br>/4<br>19 | 33<br>8/<br>18<br>67<br>8 | 0.0<br>00<br>24<br>41<br>24 | 0.0<br>02<br>16<br>08<br>86 | 0.0<br>01<br>66<br>53<br>44 | 88/83716/1893/2162/2335/2621/3082/3671/5122/5627/5919/5054/6678/7042/7043/7057/7076/7077/7078                            | 1<br>9 |
| C<br>C | G<br>O:<br>00<br>01<br>72<br>5 | stress fiber                         | 7/<br>41<br>9  | 56<br>/1<br>86<br>78      | 0.0<br>00<br>24<br>43<br>86 | 0.0<br>02<br>16<br>08<br>86 | 0.0<br>01<br>66<br>53<br>44 | 10979/10398/50507/8572/4919/7168/165904                                                                                  | 7      |
| C<br>C | G<br>O:<br>00<br>97<br>51<br>7 | contractile actin<br>filament bundle | 7/<br>41<br>9  | 56<br>/1<br>86<br>78      | 0.0<br>00<br>24<br>43<br>86 | 0.0<br>02<br>16<br>08<br>86 | 0.0<br>01<br>66<br>53<br>44 | 10979/10398/50507/8572/4919/7168/165904                                                                                  | 7      |
| C<br>C | G<br>O:<br>00                  | vesicle lumen                        | 19<br>/4<br>19 | 33<br>9/<br>18            | 0.0<br>00<br>25             | 0.0<br>02<br>18             | 0.0<br>01<br>68             | 88/83716/1893/2162/2335/2621/3082/3671/5122/5627/5919/5054/6678/7042/7043/7057/7076/7077/7078                            | 1<br>9 |

|        |                                |                                                 |                |                           |                             |                             |                             |                                                                                               |        |
|--------|--------------------------------|-------------------------------------------------|----------------|---------------------------|-----------------------------|-----------------------------|-----------------------------|-----------------------------------------------------------------------------------------------|--------|
|        | 31<br>98<br>3                  |                                                 |                | 67<br>8                   | 33<br>92                    | 30<br>71                    | 24<br>42                    |                                                                                               |        |
| C<br>C | G<br>O:<br>00<br>08<br>30<br>5 | integrin complex                                | 5/<br>41<br>9  | 30<br>/1<br>86<br>78      | 0.0<br>00<br>49<br>75<br>7  | 0.0<br>04<br>17<br>95<br>85 | 0.0<br>03<br>22<br>11<br>08 | 11117/22801/3678/3690/255743                                                                  | 5      |
| C<br>C | G<br>O:<br>00<br>42<br>64<br>1 | actomyosin                                      | 7/<br>41<br>9  | 67<br>/1<br>86<br>78      | 0.0<br>00<br>74<br>20<br>85 | 0.0<br>06<br>08<br>14<br>78 | 0.0<br>04<br>68<br>68<br>54 | 10979/10398/50507/8572/4919/7168/165904                                                       | 7      |
| C<br>C | G<br>O:<br>00<br>98<br>63<br>6 | protein complex<br>involved in cell<br>adhesion | 5/<br>41<br>9  | 33<br>/1<br>86<br>78      | 0.0<br>00<br>78<br>41<br>85 | 0.0<br>06<br>27<br>34<br>8  | 0.0<br>04<br>83<br>48<br>25 | 11117/22801/3678/3690/255743                                                                  | 5      |
| C<br>C | G<br>O:<br>00<br>31<br>25<br>3 | cell projection<br>membrane                     | 17<br>/4<br>19 | 31<br>/7<br>18<br>67<br>8 | 0.0<br>00<br>86<br>51<br>02 | 0.0<br>06<br>75<br>98<br>68 | 0.0<br>05<br>20<br>96<br>73 | 84168/1464/79901/2121/132884/2191/10979/3678/3690/57608/24141/54587/10630/5745/8910/7070/7168 | 1<br>7 |
| C<br>C | G<br>O:<br>00<br>05<br>61<br>4 | interstitial matrix                             | 3/<br>41<br>9  | 11<br>/1<br>86<br>78      | 0.0<br>01<br>61<br>72<br>61 | 0.0<br>12<br>34<br>99<br>96 | 0.0<br>09<br>51<br>78<br>54 | 151887/1842/3371                                                                              | 3      |
| C<br>C | G<br>O:<br>00<br>30<br>86<br>4 | cortical actin<br>cytoskeleton                  | 6/<br>41<br>9  | 57<br>/1<br>86<br>78      | 0.0<br>01<br>69<br>79<br>95 | 0.0<br>12<br>67<br>83<br>61 | 0.0<br>09<br>77<br>09<br>17 | 88/794/800/1000/91663/130271                                                                  | 6      |

|        |                                |                                 |                |                           |                             |                             |                             |                                                                                           |        |
|--------|--------------------------------|---------------------------------|----------------|---------------------------|-----------------------------|-----------------------------|-----------------------------|-------------------------------------------------------------------------------------------|--------|
| C<br>C | G<br>O:<br>00<br>30<br>86<br>3 | cortical cytoskeleton           | 7/<br>41<br>9  | 81<br>/1<br>86<br>78      | 0.0<br>02<br>27<br>10<br>57 | 0.0<br>16<br>58<br>85<br>88 | 0.0<br>12<br>78<br>44<br>38 | 88/794/800/1000/2316/91663/130271                                                         | 7      |
| C<br>C | G<br>O:<br>00<br>33<br>26<br>7 | axon part                       | 17<br>/4<br>19 | 35<br>/4<br>18<br>67<br>8 | 0.0<br>02<br>79<br>68<br>78 | 0.0<br>19<br>99<br>46<br>99 | 0.0<br>15<br>40<br>94<br>49 | 1759/1809/3776/24141/4130/4131/4915/23022/5101/4919/5176/6695/11075/7070/26230/7077/63923 | 1<br>7 |
| C<br>C | G<br>O:<br>00<br>31<br>08<br>9 | platelet dense granule lumen    | 3/<br>41<br>9  | 14<br>/1<br>86<br>78      | 0.0<br>03<br>39<br>36<br>53 | 0.0<br>23<br>75<br>55<br>74 | 0.0<br>18<br>30<br>78<br>67 | 1893/5919/7078                                                                            | 3      |
| C<br>C | G<br>O:<br>00<br>05<br>86<br>5 | striated muscle thin filament   | 3/<br>41<br>9  | 16<br>/1<br>86<br>78      | 0.0<br>05<br>05<br>02<br>07 | 0.0<br>34<br>62<br>99<br>9  | 0.0<br>26<br>68<br>85<br>26 | 80206/7168/7169                                                                           | 3      |
| C<br>C | G<br>O:<br>00<br>05<br>93<br>8 | cell cortex                     | 12<br>/4<br>19 | 22<br>/9<br>18<br>67<br>8 | 0.0<br>05<br>73<br>54<br>23 | 0.0<br>38<br>54<br>20<br>42 | 0.0<br>29<br>70<br>34<br>53 | 88/9590/794/800/857/1000/10979/2316/83872/91663/90102/130271                              | 1<br>2 |
| C<br>C | G<br>O:<br>00<br>31<br>09<br>2 | platelet alpha granule membrane | 3/<br>41<br>9  | 17<br>/1<br>86<br>78      | 0.0<br>06<br>03<br>14<br>29 | 0.0<br>39<br>73<br>64<br>73 | 0.0<br>30<br>62<br>39<br>74 | 3690/5099/6678                                                                            | 3      |
| C<br>C | G<br>O:<br>01                  | distal axon                     | 13<br>/4<br>19 | 26<br>/2<br>18            | 0.0<br>06<br>46             | 0.0<br>41<br>76             | 0.0<br>32<br>18             | 1809/3776/24141/4131/4915/23022/5101/4919/11075/7070/26230/7077/63923                     | 1<br>3 |



|        |                                |                                     |                |                           |                             |                                   |                             |                                                                           |        |
|--------|--------------------------------|-------------------------------------|----------------|---------------------------|-----------------------------|-----------------------------------|-----------------------------|---------------------------------------------------------------------------|--------|
|        | 50<br>03<br>4                  |                                     |                | 67<br>8                   | 38<br>89                    | 66<br>69                          | 85<br>99                    |                                                                           |        |
| C<br>C | G<br>O:<br>00<br>31<br>52<br>7 | filopodium membrane                 | 3/<br>41<br>9  | 18<br>/1<br>86<br>78      | 0.0<br>07<br>11<br>86<br>9  | 0.0<br>44<br>64<br>09             | 0.0<br>34<br>40<br>37<br>01 | 84168/3690/10630                                                          | 3      |
| C<br>C | G<br>O:<br>00<br>16<br>52<br>8 | sarcoplasm                          | 6/<br>41<br>9  | 76<br>/1<br>86<br>78      | 0.0<br>07<br>17<br>44<br>3  | 0.0<br>44<br>64<br>09<br>37<br>01 | 0.0<br>34<br>40<br>37<br>01 | 781/57158/6444/6695/7057/7060                                             | 6      |
| C<br>C | G<br>O:<br>00<br>98<br>80<br>2 | plasma membrane<br>receptor complex | 9/<br>41<br>9  | 15<br>3/<br>18<br>67<br>8 | 0.0<br>07<br>73<br>13<br>46 | 0.0<br>47<br>23<br>14<br>98       | 0.0<br>36<br>40<br>02<br>15 | 658/11117/2550/2892/22801/3678/3690/255743/93145                          | 9      |
| C<br>C | G<br>O:<br>00<br>16<br>32<br>4 | apical plasma<br>membrane           | 14<br>/4<br>19 | 30<br>0/<br>18<br>67<br>8 | 0.0<br>08<br>10<br>58<br>26 | 0.0<br>47<br>35<br>08<br>87       | 0.0<br>36<br>49<br>22<br>25 | 55107/1000/1464/4921/2151/2335/23704/3776/50507/5159/10630/5745/6781/7070 | 1<br>4 |
| C<br>C | G<br>O:<br>00<br>44<br>44<br>8 | cell cortex part                    | 8/<br>41<br>9  | 12<br>8/<br>18<br>67<br>8 | 0.0<br>08<br>29<br>17<br>54 | 0.0<br>47<br>35<br>08<br>87       | 0.0<br>36<br>49<br>22<br>25 | 88/794/800/1000/2316/91663/90102/130271                                   | 8      |
| C<br>C | G<br>O:<br>00<br>31<br>94<br>1 | filamentous actin                   | 3/<br>41<br>9  | 19<br>/1<br>86<br>78      | 0.0<br>08<br>31<br>45<br>9  | 0.0<br>47<br>35<br>08<br>87       | 0.0<br>36<br>49<br>22<br>25 | 1809/2316/8572                                                            | 3      |

|        |                                |                                                                                  |                |                           |                            |                             |                             |                                                                                                                                                                                                                                                                                                                                              |        |
|--------|--------------------------------|----------------------------------------------------------------------------------|----------------|---------------------------|----------------------------|-----------------------------|-----------------------------|----------------------------------------------------------------------------------------------------------------------------------------------------------------------------------------------------------------------------------------------------------------------------------------------------------------------------------------------|--------|
| C<br>C | G<br>O:<br>00<br>36<br>37<br>9 | myofilament                                                                      | 3/<br>41<br>9  | 19<br>/1<br>86<br>78      | 0.0<br>08<br>31<br>45<br>9 | 0.0<br>47<br>35<br>08<br>87 | 0.0<br>36<br>49<br>22<br>25 | 80206/7168/7169                                                                                                                                                                                                                                                                                                                              | 3      |
| M<br>F | G<br>O:<br>00<br>05<br>20<br>1 | extracellular matrix<br>structural constituent                                   | 60<br>/3<br>93 | 15<br>8/<br>16<br>96<br>9 | 2.5<br>4E<br>-5<br>7       | 1.2<br>0E<br>-5<br>4        | 9.8<br>8E<br>-5<br>5        | 9370/165/3730/54829/633/8483/1300/1301/1303/1306/1307/1277/1278/255631/1281/<br>1289/1290/50509/1291/1292/1293/1295/1296/1311/115908/1634/1805/1893/10085/22<br>02/11117/2199/2200/2331/2335/83872/3490/4053/4060/4148/4237/8076/25878/22795<br>/255743/5118/127435/10631/5549/10216/7837/6678/10418/8406/27286/7045/7057/70<br>58/3371/1462 | 6<br>0 |
| M<br>F | G<br>O:<br>00<br>05<br>51<br>8 | collagen binding                                                                 | 20<br>/3<br>93 | 61<br>/1<br>69<br>69      | 3.1<br>9E<br>-1<br>8       | 7.5<br>1E<br>-1<br>6        | 6.2<br>0E<br>-1<br>6        | 165/84168/54829/114897/50509/1311/1513/1634/4921/2335/22801/131578/4060/990<br>2/22795/5118/127435/6678/7045/7057                                                                                                                                                                                                                            | 2<br>0 |
| M<br>F | G<br>O:<br>00<br>30<br>02<br>0 | extracellular matrix<br>structural constituent<br>conferring tensile<br>strength | 17<br>/3<br>93 | 41<br>/1<br>69<br>69      | 1.0<br>3E<br>-1<br>7       | 1.6<br>1E<br>-1<br>5        | 1.3<br>3E<br>-1<br>5        | 1300/1301/1303/1306/1307/1277/1278/255631/1281/1289/1290/50509/1291/1292/129<br>3/1295/1296                                                                                                                                                                                                                                                  | 1<br>7 |
| M<br>F | G<br>O:<br>00<br>19<br>83<br>8 | growth factor binding                                                            | 23<br>/3<br>93 | 12<br>/1<br>16<br>96<br>9 | 5.3<br>8E<br>-1<br>5       | 6.3<br>4E<br>-1<br>3        | 5.2<br>3E<br>-1<br>3        | 1277/1278/1281/1289/1291/2260/5654/94031/3488/3489/3490/3690/2615/4053/85409<br>/8828/4915/5156/5159/7837/27286/7043/7057                                                                                                                                                                                                                    | 2<br>3 |
| M<br>F | G<br>O:<br>00<br>05<br>17<br>8 | integrin binding                                                                 | 22<br>/3<br>93 | 11<br>3/<br>16<br>96<br>9 | 1.2<br>6E<br>-1<br>4       | 1.1<br>9E<br>-1<br>2        | 9.7<br>8E<br>-1<br>3        | 88/1307/1281/1289/1311/6387/1842/10085/11117/2191/2200/2335/3678/3690/255743<br>/6423/7045/7057/7060/7070/7077/63923                                                                                                                                                                                                                         | 2<br>2 |
| M<br>F | G<br>O:<br>00                  | glycosaminoglycan<br>binding                                                     | 25<br>/3<br>93 | 19<br>9/<br>16            | 6.1<br>2E<br>-1            | 4.8<br>1E<br>-1             | 3.9<br>6E<br>-1             | 3730/633/151887/3075/1301/1289/1311/83716/1634/1809/1833/2200/2260/2335/1116<br>7/4053/8828/5118/10631/5270/7057/7058/7060/7130/1462                                                                                                                                                                                                         | 2<br>5 |

|        |                                |                                                                                        |                |                           |                      |                      |                      |                                                                                                               |        |
|--------|--------------------------------|----------------------------------------------------------------------------------------|----------------|---------------------------|----------------------|----------------------|----------------------|---------------------------------------------------------------------------------------------------------------|--------|
|        | 05<br>53<br>9                  |                                                                                        |                | 96<br>9                   | 2                    | 0                    | 0                    |                                                                                                               |        |
| M<br>F | G<br>O:<br>00<br>30<br>02<br>1 | extracellular matrix<br>structural constituent<br>conferring compression<br>resistance | 9/<br>39<br>3  | 21<br>/1<br>69<br>69      | 4.0<br>2E<br>-1<br>0 | 2.7<br>1E<br>-0<br>8 | 2.2<br>3E<br>-0<br>8 | 54829/633/1634/2331/4060/127435/5549/10216/1462                                                               | 9      |
| M<br>F | G<br>O:<br>00<br>48<br>40<br>7 | platelet-derived growth<br>factor binding                                              | 7/<br>39<br>3  | 11<br>/1<br>69<br>69      | 1.0<br>3E<br>-0<br>9 | 6.0<br>8E<br>-0<br>8 | 5.0<br>1E<br>-0<br>8 | 1277/1278/1281/1289/1291/5156/5159                                                                            | 7      |
| M<br>F | G<br>O:<br>00<br>08<br>20<br>1 | heparin binding                                                                        | 19<br>/3<br>93 | 14<br>8/<br>16<br>96<br>9 | 1.5<br>2E<br>-0<br>9 | 7.9<br>5E<br>-0<br>8 | 6.5<br>5E<br>-0<br>8 | 3730/151887/3075/1301/1289/1311/83716/2200/2260/2335/11167/4053/8828/5118/10631/5270/7057/7058/7060           | 1<br>9 |
| M<br>F | G<br>O:<br>00<br>50<br>84<br>0 | extracellular matrix<br>binding                                                        | 10<br>/3<br>93 | 43<br>/1<br>69<br>69      | 3.8<br>4E<br>-0<br>8 | 1.8<br>1E<br>-0<br>6 | 1.4<br>9E<br>-0<br>6 | 633/1301/1634/1893/3690/3956/131578/284297/7045/7057                                                          | 1<br>0 |
| M<br>F | G<br>O:<br>19<br>01<br>68<br>1 | sulfur compound<br>binding                                                             | 21<br>/3<br>93 | 22<br>/1<br>16<br>96<br>9 | 4.8<br>6E<br>-0<br>8 | 2.0<br>8E<br>-0<br>6 | 1.7<br>1E<br>-0<br>6 | 3730/151887/3075/1301/1289/1311/83716/1809/5167/2200/2260/2335/11167/4053/8828/5118/10631/5270/7057/7058/7060 | 2<br>1 |
| M<br>F | G<br>O:<br>00<br>04<br>22<br>2 | metalloendopeptidase<br>activity                                                       | 13<br>/3<br>93 | 89<br>/1<br>69<br>69      | 1.2<br>9E<br>-0<br>7 | 5.0<br>8E<br>-0<br>6 | 4.1<br>9E<br>-0<br>6 | 8038/81794/81792/140766/170690/170692/9509/9507/11174/2191/4327/4313/7092                                     | 1<br>3 |

|        |                                |                                                         |                |                           |                      |                      |                      |                                                                                                                                                     |        |
|--------|--------------------------------|---------------------------------------------------------|----------------|---------------------------|----------------------|----------------------|----------------------|-----------------------------------------------------------------------------------------------------------------------------------------------------|--------|
| M<br>F | G<br>O:<br>00<br>04<br>17<br>5 | endopeptidase activity                                  | 24<br>/3<br>93 | 32<br>2/<br>16<br>96<br>9 | 5.2<br>8E<br>-0<br>7 | 1.8<br>7E<br>-0<br>5 | 1.5<br>4E<br>-0<br>5 | 8038/81794/81792/140766/170690/170692/9509/9507/11174/715/716/10699/1513/2191/5654/94031/9622/4327/4313/4314/5122/5125/5328/7092                    | 2<br>4 |
| M<br>F | G<br>O:<br>00<br>50<br>83<br>9 | cell adhesion molecule binding                          | 29<br>/3<br>93 | 44<br>4/<br>16<br>96<br>9 | 5.5<br>5E<br>-0<br>7 | 1.8<br>7E<br>-0<br>5 | 1.5<br>4E<br>-0<br>5 | 88/800/1012/1307/1281/1289/1311/1363/6387/1842/10085/11117/2191/2200/2316/2335/3678/3690/255743/9379/90102/5789/6423/7045/7057/7060/7070/7077/63923 | 2<br>9 |
| M<br>F | G<br>O:<br>00<br>01<br>96<br>8 | fibronectin binding                                     | 7/<br>39<br>3  | 24<br>/1<br>69<br>69      | 8.3<br>4E<br>-0<br>7 | 2.6<br>2E<br>-0<br>5 | 2.1<br>6E<br>-0<br>5 | 151887/1513/3690/131578/6423/284297/7057                                                                                                            | 7      |
| M<br>F | G<br>O:<br>00<br>43<br>39<br>4 | proteoglycan binding                                    | 8/<br>39<br>3  | 36<br>/1<br>69<br>69      | 1.3<br>2E<br>-0<br>6 | 3.8<br>9E<br>-0<br>5 | 3.2<br>1E<br>-0<br>5 | 3075/1289/50509/1311/1513/2335/7057/3371                                                                                                            | 8      |
| M<br>F | G<br>O:<br>00<br>04<br>71<br>4 | transmembrane receptor protein tyrosine kinase activity | 9/<br>39<br>3  | 49<br>/1<br>69<br>69      | 1.5<br>8E<br>-0<br>6 | 4.3<br>9E<br>-0<br>5 | 3.6<br>2E<br>-0<br>5 | 4921/2202/2042/2260/8828/4915/5156/5159/5157                                                                                                        | 9      |
| M<br>F | G<br>O:<br>00<br>19<br>19<br>9 | transmembrane receptor protein kinase activity          | 10<br>/3<br>93 | 65<br>/1<br>69<br>69      | 2.2<br>8E<br>-0<br>6 | 5.9<br>6E<br>-0<br>5 | 4.9<br>2E<br>-0<br>5 | 658/4921/2202/2042/2260/8828/4915/5156/5159/5157                                                                                                    | 1<br>0 |
| M<br>F | G<br>O:<br>00                  | platelet-derived growth factor receptor binding         | 5/<br>39<br>3  | 14<br>/1<br>69            | 1.0<br>9E<br>-0      | 0.0<br>00<br>27      | 0.0<br>00<br>22      | 3678/3690/56034/5156/5159                                                                                                                           | 5      |

|        |                                |                                       |                |                           |                             |                             |                             |                                                                                |        |
|--------|--------------------------------|---------------------------------------|----------------|---------------------------|-----------------------------|-----------------------------|-----------------------------|--------------------------------------------------------------------------------|--------|
|        | 05<br>16<br>1                  |                                       |                | 69                        | 5                           | 13<br>39                    | 37<br>66                    |                                                                                |        |
| M<br>F | G<br>O:<br>00<br>08<br>23<br>7 | metallopeptidase<br>activity          | 14<br>/3<br>93 | 15<br>3/<br>16<br>96<br>9 | 1.3<br>1E<br>-0<br>5        | 0.0<br>00<br>30<br>88<br>9  | 0.0<br>00<br>25<br>47<br>34 | 8038/81794/81792/140766/170690/170692/9509/9507/11174/2191/4327/4313/4314/7092 | 1<br>4 |
| M<br>F | G<br>O:<br>00<br>05<br>52<br>0 | insulin-like growth<br>factor binding | 6/<br>39<br>3  | 26<br>/1<br>69<br>69      | 2.3<br>1E<br>-0<br>5        | 0.0<br>00<br>51<br>78<br>34 | 0.0<br>00<br>42<br>70<br>43 | 5654/94031/3488/3489/3490/3690                                                 | 6      |
| M<br>F | G<br>O:<br>00<br>61<br>13<br>4 | peptidase regulator<br>activity       | 15<br>/3<br>93 | 19<br>2/<br>16<br>96<br>9 | 4.2<br>4E<br>-0<br>5        | 0.0<br>00<br>90<br>87<br>59 | 0.0<br>00<br>74<br>94<br>29 | 3730/857/1293/1470/2335/2621/5118/5627/5054/5270/6423/6695/7076/7077/7078      | 1<br>5 |
| M<br>F | G<br>O:<br>00<br>04<br>25<br>2 | serine-type<br>endopeptidase activity | 12<br>/3<br>93 | 13<br>3/<br>16<br>96<br>9 | 6.2<br>1E<br>-0<br>5        | 0.0<br>01<br>27<br>20<br>58 | 0.0<br>01<br>04<br>90<br>32 | 715/716/10699/2191/5654/94031/9622/4313/4314/5122/5125/5328                    | 1<br>2 |
| M<br>F | G<br>O:<br>00<br>19<br>95<br>5 | cytokine binding                      | 10<br>/3<br>93 | 10<br>0/<br>16<br>96<br>9 | 0.0<br>00<br>10<br>73<br>74 | 0.0<br>02<br>04<br>27<br>21 | 0.0<br>01<br>68<br>45<br>77 | 1311/9244/26585/3690/2615/8828/10630/7837/7043/7057                            | 1<br>0 |
| M<br>F | G<br>O:<br>00<br>04<br>71<br>3 | protein tyrosine kinase<br>activity   | 11<br>/3<br>93 | 12<br>0/<br>16<br>96<br>9 | 0.0<br>00<br>10<br>84<br>25 | 0.0<br>02<br>04<br>27<br>21 | 0.0<br>01<br>68<br>45<br>77 | 558/4921/2202/2042/2260/8828/4915/5156/5159/5157/91461                         | 1<br>1 |

|        |                                |                                  |                |                           |                             |                             |                             |                                                             |        |
|--------|--------------------------------|----------------------------------|----------------|---------------------------|-----------------------------|-----------------------------|-----------------------------|-------------------------------------------------------------|--------|
| M<br>F | G<br>O:<br>00<br>02<br>02<br>0 | protease binding                 | 11<br>/3<br>93 | 12<br>/1<br>16<br>96<br>9 | 0.0<br>00<br>11             | 0.0<br>02<br>11             | 0.0<br>01<br>74<br>54<br>56 | 9507/1277/1278/1281/1311/1893/2191/2335/3690/5054/7077      | 1<br>1 |
| M<br>F | G<br>O:<br>00<br>08<br>30<br>7 | structural constituent of muscle | 6/<br>39<br>3  | 36<br>/1<br>69<br>69      | 0.0<br>00<br>16<br>06<br>26 | 0.0<br>02<br>74<br>09<br>19 | 0.0<br>02<br>26<br>03<br>63 | 88/10398/91624/27295/7168/7169                              | 6      |
| M<br>F | G<br>O:<br>00<br>05<br>04<br>4 | scavenger receptor activity      | 7/<br>39<br>3  | 51<br>/1<br>69<br>69      | 0.0<br>00<br>16<br>29<br>42 | 0.0<br>02<br>74<br>09<br>19 | 0.0<br>02<br>26<br>03<br>63 | 81035/5167/4017/84171/10216/51435/284297                    | 7      |
| M<br>F | G<br>O:<br>00<br>46<br>33<br>2 | SMAD binding                     | 8/<br>39<br>3  | 72<br>/1<br>69<br>69      | 0.0<br>00<br>25<br>29<br>41 | 0.0<br>04<br>10<br>81<br>1  | 0.0<br>03<br>38<br>78<br>48 | 8313/658/1278/1281/1290/90993/2316/56937                    | 8      |
| M<br>F | G<br>O:<br>00<br>43<br>23<br>6 | laminin binding                  | 5/<br>39<br>3  | 26<br>/1<br>69<br>69      | 0.0<br>00<br>28<br>59<br>9  | 0.0<br>04<br>49<br>00<br>38 | 0.0<br>03<br>70<br>28<br>14 | 1893/3956/131578/284297/7057                                | 5      |
| M<br>F | G<br>O:<br>00<br>08<br>23<br>6 | serine-type peptidase activity   | 12<br>/3<br>93 | 15<br>/8<br>16<br>96<br>9 | 0.0<br>00<br>31<br>79<br>72 | 0.0<br>04<br>83<br>11<br>2  | 0.0<br>03<br>98<br>40<br>95 | 715/716/10699/2191/5654/94031/9622/4313/4314/5122/5125/5328 | 1<br>2 |
| M<br>F | G<br>O:<br>00                  | Wnt-protein binding              | 5/<br>39<br>3  | 27<br>/1<br>69            | 0.0<br>00<br>34             | 0.0<br>05<br>06             | 0.0<br>04<br>18             | 115908/4919/4920/6423/6424                                  | 5      |

|        |                                |                                |                |                           |                             |                             |                             |                                                                                                                  |        |
|--------|--------------------------------|--------------------------------|----------------|---------------------------|-----------------------------|-----------------------------|-----------------------------|------------------------------------------------------------------------------------------------------------------|--------|
|        | 17<br>14<br>7                  |                                |                | 69                        | 43<br>72                    | 87<br>22                    | 00<br>39                    |                                                                                                                  |        |
| M<br>F | G<br>O:<br>00<br>30<br>54<br>5 | receptor regulator<br>activity | 22<br>/3<br>93 | 42<br>5/<br>16<br>96<br>9 | 0.0<br>00<br>39<br>59<br>97 | 0.0<br>05<br>57<br>26<br>04 | 0.0<br>04<br>59<br>55<br>77 | 9370/6356/9244/6387/2202/2200/23768/2621/26585/3082/3624/3976/56034/7837/7857/6423/6781/7042/7043/7060/7076/7472 | 2<br>2 |
| M<br>F | G<br>O:<br>00<br>48<br>01<br>8 | receptor ligand activity       | 21<br>/3<br>93 | 39<br>7/<br>16<br>96<br>9 | 0.0<br>00<br>40<br>22<br>69 | 0.0<br>05<br>57<br>26<br>04 | 0.0<br>04<br>59<br>55<br>77 | 9370/6356/9244/6387/2202/2200/23768/2621/26585/3082/3624/3976/56034/7857/6423/6781/7042/7043/7060/7076/7472      | 2<br>1 |
| M<br>F | G<br>O:<br>00<br>17<br>17<br>1 | serine hydrolase<br>activity   | 12<br>/3<br>93 | 16<br>3/<br>16<br>96<br>9 | 0.0<br>00<br>42<br>24<br>65 | 0.0<br>05<br>68<br>51<br>7  | 0.0<br>04<br>68<br>84<br>07 | 715/716/10699/2191/5654/94031/9622/4313/4314/5122/5125/5328                                                      | 1<br>2 |
| M<br>F | G<br>O:<br>00<br>51<br>01<br>5 | actin filament binding         | 11<br>/3<br>93 | 14<br>3/<br>16<br>96<br>9 | 0.0<br>00<br>50<br>27<br>85 | 0.0<br>06<br>57<br>81<br>02 | 0.0<br>05<br>42<br>47<br>84 | 88/84168/10979/2316/4620/91624/23345/6876/7168/7169/165904                                                       | 1<br>1 |
| M<br>F | G<br>O:<br>00<br>20<br>03<br>7 | heme binding                   | 9/<br>39<br>3  | 10<br>6/<br>16<br>96<br>9 | 0.0<br>00<br>79<br>46<br>55 | 0.0<br>10<br>11<br>57<br>43 | 0.0<br>08<br>34<br>21<br>81 | 1588/1545/9420/2982/125336/50507/5740/5743/7837                                                                  | 9      |
| M<br>F | G<br>O:<br>00<br>05<br>12<br>5 | cytokine activity              | 11<br>/3<br>93 | 15<br>4/<br>16<br>96<br>9 | 0.0<br>00<br>93<br>33<br>35 | 0.0<br>11<br>27<br>18<br>13 | 0.0<br>09<br>29<br>55<br>61 | 9370/6356/9244/6387/26585/3624/3976/7857/7042/7076/7472                                                          | 1<br>1 |

|        |                                |                                                           |                |                                 |                             |                             |                             |                                                        |        |
|--------|--------------------------------|-----------------------------------------------------------|----------------|---------------------------------|-----------------------------|-----------------------------|-----------------------------|--------------------------------------------------------|--------|
| M<br>F | G<br>O:<br>00<br>61<br>13<br>5 | endopeptidase<br>regulator activity                       | 11<br>/3<br>93 | 15<br>4/<br>16<br>96<br>9<br>35 | 0.0<br>00<br>93             | 0.0<br>11<br>27             | 0.0<br>09<br>29             | 3730/1293/1470/2621/5627/5054/5270/6423/6695/7076/7078 | 1<br>1 |
| M<br>F | G<br>O:<br>00<br>30<br>41<br>4 | peptidase inhibitor<br>activity                           | 11<br>/3<br>93 | 15<br>7/<br>16<br>96<br>9<br>57 | 0.0<br>01<br>09<br>30<br>57 | 0.0<br>12<br>87<br>07<br>42 | 0.0<br>10<br>61<br>41<br>55 | 3730/1293/1470/2621/5627/5054/5270/6695/7076/7077/7078 | 1<br>1 |
| M<br>F | G<br>O:<br>00<br>46<br>90<br>6 | tetrapyrrole binding                                      | 9/<br>39<br>3  | 11<br>6/<br>16<br>96<br>9<br>07 | 0.0<br>01<br>50<br>78<br>07 | 0.0<br>17<br>32<br>13<br>9  | 0.0<br>14<br>28<br>44<br>86 | 1588/1545/9420/2982/125336/50507/5740/5743/7837        | 9      |
| M<br>F | G<br>O:<br>00<br>17<br>04<br>6 | peptide hormone<br>binding                                | 5/<br>39<br>3  | 38<br>/1<br>69<br>69            | 0.0<br>01<br>73<br>80<br>25 | 0.0<br>18<br>95<br>98<br>8  | 0.0<br>15<br>63<br>57<br>04 | 552/2690/3624/4883/5745                                | 5      |
| M<br>F | G<br>O:<br>00<br>05<br>17<br>2 | vascular endothelial<br>growth factor receptor<br>binding | 3/<br>39<br>3  | 11<br>/1<br>69<br>69            | 0.0<br>01<br>77<br>11<br>99 | 0.0<br>18<br>95<br>98<br>8  | 0.0<br>15<br>63<br>57<br>04 | 26585/3678/3690                                        | 3      |
| M<br>F | G<br>O:<br>00<br>97<br>49<br>3 | structural molecule<br>activity conferring<br>elasticity  | 3/<br>39<br>3  | 11<br>/1<br>69<br>69            | 0.0<br>01<br>77<br>11<br>99 | 0.0<br>18<br>95<br>98<br>8  | 0.0<br>15<br>63<br>57<br>04 | 11117/2199/2200                                        | 3      |
| M<br>F | G<br>O:<br>00                  | growth factor receptor<br>binding                         | 9/<br>39<br>3  | 12<br>1/<br>16                  | 0.0<br>02<br>02             | 0.0<br>21<br>14             | 0.0<br>17<br>43             | 1893/2202/23768/26585/3678/3690/56034/5156/5159        | 9      |



|        |                                |                                  |                |                           |                             |                             |                             |                                                                                |        |
|--------|--------------------------------|----------------------------------|----------------|---------------------------|-----------------------------|-----------------------------|-----------------------------|--------------------------------------------------------------------------------|--------|
|        | 70<br>85<br>1                  |                                  |                | 96<br>9                   | 03<br>32                    | 61<br>46                    | 86<br>59                    |                                                                                |        |
| M<br>F | G<br>O:<br>00<br>15<br>02<br>6 | coreceptor activity              | 5/<br>39<br>3  | 40<br>/1<br>69<br>69      | 0.0<br>02<br>19<br>39<br>45 | 0.0<br>21<br>86<br>62<br>22 | 0.0<br>18<br>03<br>24<br>86 | 2239/10082/3690/4919/4920                                                      | 5      |
| M<br>F | G<br>O:<br>00<br>08<br>08<br>3 | growth factor activity           | 10<br>/3<br>93 | 14<br>7/<br>16<br>96<br>9 | 0.0<br>02<br>26<br>07<br>74 | 0.0<br>21<br>86<br>62<br>22 | 0.0<br>18<br>03<br>24<br>86 | 6387/2202/3082/3624/3976/56034/7042/7043/7060/7076                             | 1<br>0 |
| M<br>F | G<br>O:<br>00<br>30<br>24<br>6 | carbohydrate binding             | 14<br>/3<br>93 | 25<br>2/<br>16<br>96<br>9 | 0.0<br>02<br>31<br>06<br>19 | 0.0<br>21<br>86<br>62<br>22 | 0.0<br>18<br>03<br>24<br>86 | 57124/1272/81035/5167/117248/11227/3956/4017/9902/10536/283208/5352/10216/1462 | 1<br>4 |
| M<br>F | G<br>O:<br>00<br>04<br>06<br>5 | arylsulfatase activity           | 3/<br>39<br>3  | 12<br>/1<br>69<br>69      | 0.0<br>02<br>32<br>12<br>55 | 0.0<br>21<br>86<br>62<br>22 | 0.0<br>18<br>03<br>24<br>86 | 340075/23213/55959                                                             | 3      |
| M<br>F | G<br>O:<br>00<br>32<br>03<br>6 | myosin heavy chain binding       | 3/<br>39<br>3  | 12<br>/1<br>69<br>69      | 0.0<br>02<br>32<br>12<br>55 | 0.0<br>21<br>86<br>62<br>22 | 0.0<br>18<br>03<br>24<br>86 | 558/10398/85409                                                                | 3      |
| M<br>F | G<br>O:<br>00<br>04<br>86<br>6 | endopeptidase inhibitor activity | 10<br>/3<br>93 | 14<br>9/<br>16<br>96<br>9 | 0.0<br>02<br>49<br>57<br>85 | 0.0<br>23<br>04<br>93<br>1  | 0.0<br>19<br>00<br>81<br>47 | 3730/1293/1470/2621/5627/5054/5270/6695/7076/7078                              | 1<br>0 |

|        |                                |                                          |               |                      |                             |                             |                             |                                          |   |
|--------|--------------------------------|------------------------------------------|---------------|----------------------|-----------------------------|-----------------------------|-----------------------------|------------------------------------------|---|
| M<br>F | G<br>O:<br>00<br>42<br>56<br>2 | hormone binding                          | 7/<br>39<br>3 | 81<br>/1<br>69<br>69 | 0.0<br>02<br>70<br>63<br>01 | 0.0<br>24<br>51<br>28<br>43 | 0.0<br>20<br>21<br>50<br>84 | 220/552/1012/2690/3624/4883/5745         | 7 |
| M<br>F | G<br>O:<br>00<br>38<br>02<br>4 | cargo receptor activity                  | 7/<br>39<br>3 | 85<br>/1<br>69<br>69 | 0.0<br>03<br>55<br>15<br>47 | 0.0<br>31<br>56<br>18<br>65 | 0.0<br>26<br>02<br>82<br>23 | 81035/5167/4017/84171/10216/51435/284297 | 7 |
| M<br>F | G<br>O:<br>00<br>08<br>19<br>1 | metalloendopeptidase inhibitor activity  | 3/<br>39<br>3 | 14<br>/1<br>69<br>69 | 0.0<br>03<br>71<br>07<br>49 | 0.0<br>32<br>36<br>59<br>81 | 0.0<br>26<br>69<br>13<br>55 | 6695/7076/7078                           | 3 |
| M<br>F | G<br>O:<br>00<br>08<br>48<br>4 | sulfuric ester hydrolase activity        | 3/<br>39<br>3 | 15<br>/1<br>69<br>69 | 0.0<br>04<br>55<br>94<br>77 | 0.0<br>38<br>34<br>84<br>59 | 0.0<br>31<br>62<br>49<br>44 | 340075/23213/55959                       | 3 |
| M<br>F | G<br>O:<br>00<br>30<br>16<br>9 | low-density lipoprotein particle binding | 3/<br>39<br>3 | 15<br>/1<br>69<br>69 | 0.0<br>04<br>55<br>94<br>77 | 0.0<br>38<br>34<br>84<br>59 | 0.0<br>31<br>62<br>49<br>44 | 1012/81035/7057                          | 3 |
